# Supplementary material for: Application of near-infrared hyperspectral imaging to identify a variety of silage maize seeds and common maize seeds
Source: RSC Adv. 2020 Mar 23;10(20):11707–15. doi: 10.1039/c9ra11047j (PMC9050551; doi:10.1039/c9ra11047j)
Supplement: RA-010-C9RA11047J-s002 [file RA-010-C9RA11047J-s002.xlsx]

## Sheet: Sheet1
0	0	0	0	0	0	0	0	0	0	0	0	0	0	0	0	0	0	0	0	0	0	0	0	0	0	0	0	0	0	0	0	0	0	0	0	0	0	0	0	0	0	0	0	0	0	0	0	0	0
0	0	0	0	0	0	0	0	0	0	0	0	0	0	0	0	0	0	0	0	0	0	0	0	0	0	0	0	0	0	0	0	0	0	0	0	0	0	0	0	0	0	0	0	0	0	0	0	0	0
0	0	0	0	0	0	0	0	0	0	0	0	0	0	0	0	0	0	0	0	0	0	0	0	0	0	0	0	0	0	0	0	0	0	0	0	0	0	0	0	0	0	0	0	0	0	0	0	0	0
0	0	0	0	0	0	0	0	0	0	0	0	0	0	0	0	0	0	0	0	0	0	0	0	0	0	0	0	0	0	0	0	0	0	0	0	0	0	0	0	0	0	0	0	0	0	0	0	0	0
0	0	0	0	0	0	0	0	0	0	0	0	0	0	0	0	0	0	0	0	0	0	0	0	0	0	0	0	0	0	0	0	0	0	0	0	0	0	0	0	0	0	0	0	0	0	0	0	0	0
0	0	0	0	0	0	0	0	0	0	0	0	0	0	0	0	0	0	0	0	0	0	0	0	0	0	0	0	0	0	0	0	0	0	0	0	0	0	0	0	0	0	0	0	0	0	0	0	0	0
0	0	0	0	0	0	0	0	0	0	0	0	0	0	0	0	0	0	0	0	0	0	0	0	0	0	0	0	0	0	0	0	0	0	0	0	0	0	0	0	0	0	0	0	0	0	0	0	0	0
0	0	0	0	0	0	0	0	0	0	0	0	0	0	0	0	0	0	0	0	0	0	0	0	0	0	0	0	0	0	0	0	0	0	0	0	0	0	0	0	0	0	0	0	0	0	0	0	0	0
0	0	0	0	0	0	0	0	0	0	0	0	0	0	0	0	0	0	0	0	0	0	0	0	0	0	0	0	0	0	0	0	0	0	0	0	0	0	0	0	0	0	0	0	0	0	0	0	0	0
0	0	0	0	0	0	0	0	0	0	0	0	0	0	0	0	0	0	0	0	0	0	0	0	0	0	0	0	0	0	0	0	0	0	0	0	0	0	0	0	0	0	0	0	0	0	0	0	0	0
0	0	0	0	0	0	0	0	0	0	0	0	0	0	0	0	0	0	0	0	0	0	0	0	0	0	0	0	0	0	0	0	0	0	0	0	0	0	0	0	0	0	0	0	0	0	0	0	0	0
0	0	0	0	0	0	0	0	0	0	0	0	0	0	0	0	0	0	0	0	0	0	0	0	0	0	0	0	0	0	0	0	0	0	0	0	0	0	0	0	0	0	0	0	0	0	0	0	0	0
0	0	0	0	0	0	0	0	0	0	0	0	0	0	0	0	0	0	0	0	0	0	0	0	0	0	0	0	0	0	0	0	0	0	0	0	0	0	0	0	0	0	0	0	0	0	0	0	0	0
0	0	0	0	0	0	0	0	0	0	0	0	0	0	0	0	0	0	0	0	0	0	0	0	0	0	0	0	0	0	0	0	0	0	0	0	0	0	0	0	0	0	0	0	0	0	0	0	0	0
0	0	0	0	0	0	0	0	0	0	0	0	0	0	0	0	0	0	0	0	0	0	0	0	0	0	0	0	0	0	0	0	0	0	0	0	0	0	0	0	0	0	0	0	0	0	0	0	0	0
0	0	0	0	0	0	0	0	0	0	0	0	0	0	0	0	0	0	0	0	0	0	0	0	0	0	0	0	0	0	0	0	0	0	0	0	0	0	0	0	0	0	0	0	0	0	0	0	0	0
0	0	0	0	0	0	0	0	0	0	0	0	0	0	0	0	0	0	0	0	0	0	0	0	0	0	0	0	0	0	0	0	0	0	0	0	0	0	0	0	0	0	0	0	0	0	0	0	0	0
0	0	0	0	0	0	0	0	0	0	0	0	0	0	0	0	0	0	0	0	0	0	0	0	0	0	0	0	0	0	0	0	0	0	0	0	0	0	0	0	0	0	0	0	0	0	0	0	0	0
0	0	0	0	0	0	0	0	0	0	0	0	0	0	0	0	0	0	0	0	0	0	0	0	0	0	0	0	0	0	0	0	0	0	0	0	0	0	0	0	0	0	0	0	0	0	0	0	0	0
0	0	0	0	0	0	0	0	0	0	0	0	0	0	0	0	0	0	0	0	0	0	0	0	0	0	0	0	0	0	0	0	0	0	0	0	0	0	0	0	0	0	0	0	0	0	0	0	0	0
0	0	0	0	0	0	0	0	0	0	0	0	0	0	0	0	0	0	0	0	0	0	0	0	0	0	0	0	0	0	0	0	0	0	0	0	0	0	0	0	0	0	0	0	0	0	0	0	0	0
0	0	0	0	0	0	0	0	0	0	0	0	0	0	0	0	0	0	0	0	0	0	0	0	0	0	0	0	0	0	0	0	0	0	0	0	0	0	0	0	0	0	0	0	0	0	0	0	0	0
0	0	0	0	0	0	0	0	0	0	0	0	0	0	0	0	0	0	0	0	0	0	0	0	0	0	0	0	0	0	0	0	0	0	0	0	0	0	0	0	0	0	0	0	0	0	0	0	0	0
0	0	0	0	0	0	0	0	0	0	0	0	0	0	0	0	0	0	0	0	0	0	0	0	0	0	0	0	0	0	0	0	0	0	0	0	0	0	0	0	0	0	0	0	0	0	0	0	0	0
0	0	0	0	0	0	0	0	0	0	0	0	0	0	0	0	0	0	0	0	0	0	0	0	0	0	0	0	0	0	0	0	0	0	0	0	0	0	0	0	0	0	0	0	0	0	0	0	0	0
0	0	0	0	0	0	0	0	0	0	0	0	0	0	0	0	0	0	0	0	0	0	0	0	0	0	0	0	0	0	0	0	0	0	0	0	0	0	0	0	0	0	0	0	0	0	0	0	0	0
0	0	0	0	0	0	0	0	0	0	0	0	0	0	0	0	0	0	0	0	0	0	0	0	0	0	0	0	0	0	0	0	0	0	0	0	0	0	0	0	0	0	0	0	0	0	0	0	0	0
0	0	0	0	0	0	0	0	0	0	0	0	0	0	0	0	0	0	0	0	0	0	0	0	0	0	0	0	0	0	0	0	0	0	0	0	0	0	0	0	0	0	0	0	0	0	0	0	0	0
0	0	0	0	0	0	0	0	0	0	0	0	0	0	0	0	0	0	0	0	0	0	0	0	0	0	0	0	0	0	0	0	0	0	0	0	0	0	0	0	0	0	0	0	0	0	0	0	0	0
0	0	0	0	0	0	0	0	0	0	0	0	0	0	0	0	0	0	0	0	0	0	0	0	0	0	0	0	0	0	0	0	0	0	0	0	0	0	0	0	0	0	0	0	0	0	0	0	0	0
0	0	0	0	0	0	0	0	0	0	0	0	0	0	0	0	0	0	0	0	0	0	0	0	0	0	0	0	0	0	0	0	0	0	0	0	0	0	0	0	0	0	0	0	0	0	0	0	0	0
0	0	0	0	0	0	0	0	0	0	0	0	0	0	0	0	0	0	0	0	0	0	0	0	0	0	0	0	0	0	0	0	0	0	0	0	0	0	0	0	0	0	0	0	0	0	0	0	0	0
0	0	0	0	0	0	0	0	0	0	0	0	0	0	0	0	0	0	0	0	0	0	0	0	0	0	0	0	0	0	0	0	0	0	0	0	0	0	0	0	0	0	0	0	0	0	0	0	0	0
0	0	0	0	0	0	0	0	0	0	0	0	0	0	0	0	0	0	0	0	0	0	0	0	0	0	0	0	0	0	0	0	0	0	0	0	0	0	0	0	0	0	0	0	0	0	0	0	0	0
0	0	0	0	0	0	0	0	0	0	0	0	0	0	0	0	0	0	0	0	0	0	0	0	0	0	0	0	0	0	0	0	0	0	0	0	0	0	0	0	0	0	0	0	0	0	0	0	0	0
0	0	0	0	0	0	0	0	0	0	0	0	0	0	0	0	0	0	0	0	0	0	0	0	0	0	0	0	0	0	0	0	0	0	0	0	0	0	0	0	0	0	0	0	0	0	0	0	0	0
0	0	0	0	0	0	0	0	0	0	0	0	0	0	0	0	0	0	0	0	0	0	0	0	0	0	0	0	0	0	0	0	0	0	0	0	0	0	0	0	0	0	0	0	0	0	0	0	0	0
0	0	0	0	0	0	0	0	0	0	0	0	0	0	0	0	0	0	0	0	0	0	0	0	0	0	0	0	0	0	0	0	0	0	0	0	0	0	0	0	0	0	0	0	0	0	0	0	0	0
0	0	0	0	0	0	0	0	0	0	0	0	0	0	0	0	0	0	0	0	0	0	0	0	0	0	0	0	0	0	0	0	0	0	0	0	0	0	0	0	0	0	0	0	0	0	0	0	0	0
0	0	0	0	0	0	0	0	0	0	0	0	0	0	0	0	0	0	0	0	0	0	0	0	0	0	0	0	0	0	0	0	0	0	0	0	0	0	0	0	0	0	0	0	0	0	0	0	0	0
0	0	0	0	0	0	0	0	0	0	0	0	0	0	0	0	0	0	0	0	0	0	0	0	0	0	0	0	0	0	0	0	0	0	0	0	0	0	0	0	0	0	0	0	0	0	0	0	0	0
0	0	0	0	0	0	0	0	0	0	0	0	0	0	0	0	0	0	0	0	0	0	0	0	0	0	0	0	0	0	0	0	0	0	0	0	0	0	0	0	0	0	0	0	0	0	0	0	0	0
0	0	0	0	0	0	0	0	0	0	0	0	0	0	0	0	0	0	0	0	0	0	0	0	0	0	0	0	0	0	0	0	0	0	0	0	0	0	0	0	0	0	0	0	0	0	0	0	0	0
0	0	0	0	0	0	0	0	0	0	0	0	0	0	0	0	0	0	0	0	0	0	0	0	0	0	0	0	0	0	0	0	0	0	0	0	0	0	0	0	0	0	0	0	0	0	0	0	0	0
0	0	0	0	0	0	0	0	0	0	0	0	0	0	0	0	0	0	0	0	0	0	0	0	0	0	0	0	0	0	0	0	0	0	0	0	0	0	0	0	0	0	0	0	0	0	0	0	0	0
0	0	0	0	0	0	0	0	0	0	0	0	0	0	0	0	0	0	0	0	0	0	0	0	0	0	0	0	0	0	0	0	0	0	0	0	0	0	0	0	0	0	0	0	0	0	0	0	0	0
0	0	0	0	0	0	0	0	0	0	0	0	0	0	0	0	0	0	0	0	0	0	0	0	0	0	0	0	0	0	0	0	0	0	0	0	0	0	0	0	0	0	0	0	0	0	0	0	0	0
0	0	0	0	0	0	0	0	0	0	0	0	0	0	0	0	0	0	0	0	0	0	0	0	0	0	0	0	0	0	0	0	0	0	0	0	0	0	0	0	0	0	0	0	0	0	0	0	0	0
0	0	0	0	0	0	0	0	0	0	0	0	0	0	0	0	0	0	0	0	0	0	0	0	0	0	0	0	0	0	0	0	0	0	0	0	0	0	0	0	0	0	0	0	0	0	0	0	0	0
0	0	0	0	0	0	0	0	0	0	0	0	0	0	0	0	0	0	0	0	0	0	0	0	0	0	0	0	0	0	0	0	0	0	0	0	0	0	0	0	0	0	0	0	0	0	0	0	0	0
0	0	0	0	0	0	0	0	0	0	0	0	0	0	0	0	0	0	0	0	0	0	0	0	0	0	0	0	0	0	0	0	0	0	0	0	0	0	0	0	0	0	0	0	0	0	0	0	0	0
0	0	0	0	0	0	0	0	0	0	0	0	0	0	0	0	0	0	0	0	0	0	0	0	0	0	0	0	0	0	0	0	0	0	0	0	0	0	0	0	0	0	0	0	0	0	0	0	0	0
0	0	0	0	0	0	0	0	0	0	0	0	0	0	0	0	0	0	0	0	0	0	0	0	0	0	0	0	0	0	0	0	0	0	0	0	0	0	0	0	0	0	0	0	0	0	0	0	0	0
0	0	0	0	0	0	0	0	0	0	0	0	0	0	0	0	0	0	0	0	0	0	0	0	0	0	0	0	0	0	0	0	0	0	0	0	0	0	0	0	0	0	0	0	0	0	0	0	0	0
0	0	0	0	0	0	0	0	0	0	0	0	0	0	0	0	0	0	0	0	0	0	0	0	0	0	0	0	0	0	0	0	0	0	0	0	0	0	0	0	0	0	0	0	0	0	0	0	0	0
0	0	0	0	0	0	0	0	0	0	0	0	0	0	0	0	0	0	0	0	0	0	0	0	0	0	0	0	0	0	0	0	0	0	0	0	0	0	0	0	0	0	0	0	0	0	0	0	0	0
0	0	0	0	0	0	0	0	0	0	0	0	0	0	0	0	0	0	0	0	0	0	0	0	0	0	0	0	0	0	0	0	0	0	0	0	0	0	0	0	0	0	0	0	0	0	0	0	0	0
0	0	0	0	0	0	0	0	0	0	0	0	0	0	0	0	0	0	0	0	0	0	0	0	0	0	0	0	0	0	0	0	0	0	0	0	0	0	0	0	0	0	0	0	0	0	0	0	0	0
0	0	0	0	0	0	0	0	0	0	0	0	0	0	0	0	0	0	0	0	0	0	0	0	0	0	0	0	0	0	0	0	0	0	0	0	0	0	0	0	0	0	0	0	0	0	0	0	0	0
0	0	0	0	0	0	0	0	0	0	0	0	0	0	0	0	0	0	0	0	0	0	0	0	0	0	0	0	0	0	0	0	0	0	0	0	0	0	0	0	0	0	0	0	0	0	0	0	0	0
0	0	0	0	0	0	0	0	0	0	0	0	0	0	0	0	0	0	0	0	0	0	0	0	0	0	0	0	0	0	0	0	0	0	0	0	0	0	0	0	0	0	0	0	0	0	0	0	0	0
0	0	0	0	0	0	0	0	0	0	0	0	0	0	0	0	0	0	0	0	0	0	0	0	0	0	0	0	0	0	0	0	0	0	0	0	0	0	0	0	0	0	0	0	0	0	0	0	0	0
0	0	0	0	0	0	0	0	0	0	0	0	0	0	0	0	0	0	0	0	0	0	0	0	0	0	0	0	0	0	0	0	0	0	0	0	0	0	0	0	0	0	0	0	0	0	0	0	0	0
0	0	0	0	0	0	0	0	0	0	0	0	0	0	0	0	0	0	0	0	0	0	0	0	0	0	0	0	0	0	0	0	0	0	0	0	0	0	0	0	0	0	0	0	0	0	0	0	0	0
0	0	0	0	0	0	0	0	0	0	0	0	0	0	0	0	0	0	0	0	0	0	0	0	0	0	0	0	0	0	0	0	0	0	0	0	0	0	0	0	0	0	0	0	0	0	0	0	0	0
0	0	0	0	0	0	0	0	0	0	0	0	0	0	0	0	0	0	0	0	0	0	0	0	0	0	0	0	0	0	0	0	0	0	0	0	0	0	0	0	0	0	0	0	0	0	0	0	0	0
0	0	0	0	0	0	0	0	0	0	0	0	0	0	0	0	0	0	0	0	0	0	0	0	0	0	0	0	0	0	0	0	0	0	0	0	0	0	0	0	0	0	0	0	0	0	0	0	0	0
0	0	0	0	0	0	0	0	0	0	0	0	0	0	0	0	0	0	0	0	0	0	0	0	0	0	0	0	0	0	0	0	0	0	0	0	0	0	0	0	0	0	0	0	0	0	0	0	0	0
0	0	0	0	0	0	0	0	0	0	0	0	0	0	0	0	0	0	0	0	0	0	0	0	0	0	0	0	0	0	0	0	0	0	0	0	0	0	0	0	0	0	0	0	0	0	0	0	0	0
0	0	0	0	0	0	0	0	0	0	0	0	0	0	0	0	0	0	0	0	0	0	0	0	0	0	0	0	0	0	0	0	0	0	0	0	0	0	0	0	0	0	0	0	0	0	0	0	0	0
0	0	0	0	0	0	0	0	0	0	0	0	0	0	0	0	0	0	0	0	0	0	0	0	0	0	0	0	0	0	0	0	0	0	0	0	0	0	0	0	0	0	0	0	0	0	0	0	0	0
0	0	0	0	0	0	0	0	0	0	0	0	0	0	0	0	0	0	0	0	0	0	0	0	0	0	0	0	0	0	0	0	0	0	0	0	0	0	0	0	0	0	0	0	0	0	0	0	0	0
0	0	0	0	0	0	0	0	0	0	0	0	0	0	0	0	0	0	0	0	0	0	0	0	0	0	0	0	0	0	0	0	0	0	0	0	0	0	0	0	0	0	0	0	0	0	0	0	0	0
0	0	0	0	0	0	0	0	0	0	0	0	0	0	0	0	0	0	0	0	0	0	0	0	0	0	0	0	0	0	0	0	0	0	0	0	0	0	0	0	0	0	0	0	0	0	0	0	0	0
0	0	0	0	0	0	0	0	0	0	0	0	0	0	0	0	0	0	0	0	0	0	0	0	0	0	0	0	0	0	0	0	0	0	0	0	0	0	0	0	0	0	0	0	0	0	0	0	0	0
0	0	0	0	0	0	0	0	0	0	0	0	0	0	0	0	0	0	0	0	0	0	0	0	0	0	0	0	0	0	0	0	0	0	0	0	0	0	0	0	0	0	0	0	0	0	0	0	0	0
0	0	0	0	0	0	0	0	0	0	0	0	0	0	0	0	0	0	0	0	0	0	0	0	0	0	0	0	0	0	0	0	0	0	0	0	0	0	0	0	0	0	0	0	0	0	0	0	0	0
0	0	0	0	0	0	0	0	0	0	0	0	0	0	0	0	0	0	0	0	0	0	0	0	0	0	0	0	0	0	0	0	0	0	0	0	0	0	0	0	0	0	0	0	0	0	0	0	0	0
0	0	0	0	0	0	0	0	0	0	0	0	0	0	0	0	0	0	0	0	0	0	0	0	0	0	0	0	0	0	0	0	0	0	0	0	0	0	0	0	0	0	0	0	0	0	0	0	0	0
0	0	0	0	0	0	0	0	0	0	0	0	0	0	0	0	0	0	0	0	0	0	0	0	0	0	0	0	0	0	0	0	0	0	0	0	0	0	0	0	0	0	0	0	0	0	0	0	0	0
0	0	0	0	0	0	0	0	0	0	0	0	0	0	0	0	0	0	0	0	0	0	0	0	0	0	0	0	0	0	0	0	0	0	0	0	0	0	0	0	0	0	0	0	0	0	0	0	0	0
0	0	0	0	0	0	0	0	0	0	0	0	0	0	0	0	0	0	0	0	0	0	0	0	0	0	0	0	0	0	0	0	0	0	0	0	0	0	0	0	0	0	0	0	0	0	0	0	0	0
0	0	0	0	0	0	0	0	0	0	0	0	0	0	0	0	0	0	0	0	0	0	0	0	0	0	0	0	0	0	0	0	0	0	0	0	0	0	0	0	0	0	0	0	0	0	0	0	0	0
0	0	0	0	0	0	0	0	0	0	0	0	0	0	0	0	0	0	0	0	0	0	0	0	0	0	0	0	0	0	0	0	0	0	0	0	0	0	0	0	0	0	0	0	0	0	0	0	0	0
0	0	0	0	0	0	0	0	0	0	0	0	0	0	0	0	0	0	0	0	0	0	0	0	0	0	0	0	0	0	0	0	0	0	0	0	0	0	0	0	0	0	0	0	0	0	0	0	0	0
0	0	0	0	0	0	0	0	0	0	0	0	0	0	0	0	0	0	0	0	0	0	0	0	0	0	0	0	0	0	0	0	0	0	0	0	0	0	0	0	0	0	0	0	0	0	0	0	0	0
0	0	0	0	0	0	0	0	0	0	0	0	0	0	0	0	0	0	0	0	0	0	0	0	0	0	0	0	0	0	0	0	0	0	0	0	0	0	0	0	0	0	0	0	0	0	0	0	0	0
0	0	0	0	0	0	0	0	0	0	0	0	0	0	0	0	0	0	0	0	0	0	0	0	0	0	0	0	0	0	0	0	0	0	0	0	0	0	0	0	0	0	0	0	0	0	0	0	0	0
0	0	0	0	0	0	0	0	0	0	0	0	0	0	0	0	0	0	0	0	0	0	0	0	0	0	0	0	0	0	0	0	0	0	0	0	0	0	0	0	0	0	0	0	0	0	0	0	0	0
0	0	0	0	0	0	0	0	0	0	0	0	0	0	0	0	0	0	0	0	0	0	0	0	0	0	0	0	0	0	0	0	0	0	0	0	0	0	0	0	0	0	0	0	0	0	0	0	0	0
0	0	0	0	0	0	0	0	0	0	0	0	0	0	0	0	0	0	0	0	0	0	0	0	0	0	0	0	0	0	0	0	0	0	0	0	0	0	0	0	0	0	0	0	0	0	0	0	0	0
0	0	0	0	0	0	0	0	0	0	0	0	0	0	0	0	0	0	0	0	0	0	0	0	0	0	0	0	0	0	0	0	0	0	0	0	0	0	0	0	0	0	0	0	0	0	0	0	0	0
0	0	0	0	0	0	0	0	0	0	0	0	0	0	0	0	0	0	0	0	0	0	0	0	0	0	0	0	0	0	0	0	0	0	0	0	0	0	0	0	0	0	0	0	0	0	0	0	0	0
0	0	0	0	0	0	0	0	0	0	0	0	0	0	0	0	0	0	0	0	0	0	0	0	0	0	0	0	0	0	0	0	0	0	0	0	0	0	0	0	0	0	0	0	0	0	0	0	0	0
0	0	0	0	0	0	0	0	0	0	0	0	0	0	0	0	0	0	0	0	0	0	0	0	0	0	0	0	0	0	0	0	0	0	0	0	0	0	0	0	0	0	0	0	0	0	0	0	0	0
0	0	0	0	0	0	0	0	0	0	0	0	0	0	0	0	0	0	0	0	0	0	0	0	0	0	0	0	0	0	0	0	0	0	0	0	0	0	0	0	0	0	0	0	0	0	0	0	0	0
0	0	0	0	0	0	0	0	0	0	0	0	0	0	0	0	0	0	0	0	0	0	0	0	0	0	0	0	0	0	0	0	0	0	0	0	0	0	0	0	0	0	0	0	0	0	0	0	0	0
0	0	0	0	0	0	0	0	0	0	0	0	0	0	0	0	0	0	0	0	0	0	0	0	0	0	0	0	0	0	0	0	0	0	0	0	0	0	0	0	0	0	0	0	0	0	0	0	0	0
0	0	0	0	0	0	0	0	0	0	0	0	0	0	0	0	0	0	0	0	0	0	0	0	0	0	0	0	0	0	0	0	0	0	0	0	0	0	0	0	0	0	0	0	0	0	0	0	0	0
0	0	0	0	0	0	0	0	0	0	0	0	0	0	0	0	0	0	0	0	0	0	0	0	0	0	0	0	0	0	0	0	0	0	0	0	0	0	0	0	0	0	0	0	0	0	0	0	0	0
0	0	0	0	0	0	0	0	0	0	0	0	0	0	0	0	0	0	0	0	0	0	0	0	0	0	0	0	0	0	0	0	0	0	0	0	0	0	0	0	0	0	0	0	0	0	0	0	0	0
0	0	0	0	0	0	0	0	0	0	0	0	0	0	0	0	0	0	0	0	0	0	0	0	0	0	0	0	0	0	0	0	0	0	0	0	0	0	0	0	0	0	0	0	0	0	0	0	0	0
0	0	0	0	0	0	0	0	0	0	0	0	0	0	0	0	0	0	0	0	0	0	0	0	0	0	0	0	0	0	0	0	0	0	0	0	0	0	0	0	0	0	0	0	0	0	0	0	0	0
0	0	0	0	0	0	0	0	0	0	0	0	0	0	0	0	0	0	0	0	0	0	0	0	0	0	0	0	0	0	0	0	0	0	0	0	0	0	0	0	0	0	0	0	0	0	0	0	0	0
0	0	0	0	0	0	0	0	0	0	0	0	0	0	0	0	0	0	0	0	0	0	0	0	0	0	0	0	0	0	0	0	0	0	0	0	0	0	0	0	0	0	0	0	0	0	0	0	0	0
0	0	0	0	0	0	0	0	0	0	0	0	0	0	0	0	0	0	0	0	0	0	0	0	0	0	0	0	0	0	0	0	0	0	0	0	0	0	0	0	0	0	0	0	0	0	0	0	0	0
0	0	0	0	0	0	0	0	0	0	0	0	0	0	0	0	0	0	0	0	0	0	0	0	0	0	0	0	0	0	0	0	0	0	0	0	0	0	0	0	0	0	0	0	0	0	0	0	0	0
0	0	0	0	0	0	0	0	0	0	0	0	0	0	0	0	0	0	0	0	0	0	0	0	0	0	0	0	0	0	0	0	0	0	0	0	0	0	0	0	0	0	0	0	0	0	0	0	0	0
0	0	0	0	0	0	0	0	0	0	0	0	0	0	0	0	0	0	0	0	0	0	0	0	0	0	0	0	0	0	0	0	0	0	0	0	0	0	0	0	0	0	0	0	0	0	0	0	0	0
0	0	0	0	0	0	0	0	0	0	0	0	0	0	0	0	0	0	0	0	0	0	0	0	0	0	0	0	0	0	0	0	0	0	0	0	0	0	0	0	0	0	0	0	0	0	0	0	0	0
0	0	0	0	0	0	0	0	0	0	0	0	0	0	0	0	0	0	0	0	0	0	0	0	0	0	0	0	0	0	0	0	0	0	0	0	0	0	0	0	0	0	0	0	0	0	0	0	0	0
0	0	0	0	0	0	0	0	0	0	0	0	0	0	0	0	0	0	0	0	0	0	0	0	0	0	0	0	0	0	0	0	0	0	0	0	0	0	0	0	0	0	0	0	0	0	0	0	0	0
0	0	0	0	0	0	0	0	0	0	0	0	0	0	0	0	0	0	0	0	0	0	0	0	0	0	0	0	0	0	0	0	0	0	0	0	0	0	0	0	0	0	0	0	0	0	0	0	0	0
0	0	0	0	0	0	0	0	0	0	0	0	0	0	0	0	0	0	0	0	0	0	0	0	0	0	0	0	0	0	0	0	0	0	0	0	0	0	0	0	0	0	0	0	0	0	0	0	0	0
0	0	0	0	0	0	0	0	0	0	0	0	0	0	0	0	0	0	0	0	0	0	0	0	0	0	0	0	0	0	0	0	0	0	0	0	0	0	0	0	0	0	0	0	0	0	0	0	0	0
0	0	0	0	0	0	0	0	0	0	0	0	0	0	0	0	0	0	0	0	0	-0.0504558	-0.0387624	-0.00341177	0.0222789	-0.000735718	0.00859354	0	0	0	0	0	0	0	0	0	0	0	0	0	0	0	0	0	0	0	0	0	0	0
0	0	0	0	0	0	0	0	0	0	0	0	0	0	0	0	0	0	0	0	-0.0414117	-0.0326751	0.00396105	0.015041	0.00308516	0.00598989	0.0101064	-0.0139931	-0.0160896	0	0	0	0	0	0	0	0	0	0	0	0	0	0	0	0	0	0	0	0	0
0	0	0	0	0	0	0	0	0	0	0	0	0	0	0	-0.0458684	0.00385405	0	0	0.00391152	-0.0225703	-0.0186615	0.00999034	-0.00530083	0.00112277	0.0016373	5.47455e-05	-0.0096489	-0.00260309	0.00153321	0	0	0	0	0	0	0	0	0	0	0	0	0	0	0	0	0	0	0	0
0	0	0	0	0	0	0	0	0	0	0	0	0	0	-0.121777	-0.0189399	-0.0202082	-0.031375	0.0346795	0.0274183	-0.0240117	0.00579859	0.00509797	-0.00644643	-0.00201086	-0.00417753	-0.00126058	-0.00740952	-0.00267142	0.00657103	-2.38486e-05	0	0	0	0	0	0	0	0	0	0	0	0	0	0	0	0	0	0	0
0	0	0	0	0	0	0	0	0	0	0	0	0	0	-0.0734601	-0.0114037	-0.0392875	-0.0217932	0.0426669	0.0128645	-0.0131935	0.00254944	-0.000528246	-0.00962508	-0.0129988	-0.0129601	-0.00792492	-0.00966257	-0.00398313	0.000665921	-0.00339229	-0.00796854	0.00884766	0	0	0	0	0	0	0	0	0	0	0	0	0	0	0	0	0
0	0	0	0	0	0	0	0	0	0	0	0	0	-0.107023	-0.0215017	-0.018245	-0.04341	-0.00814789	0.0497995	0.0143353	-0.00762515	-0.0117346	-0.0086627	-0.0111651	-0.00865141	-0.0138474	-0.0156341	-0.0223678	-0.0083726	-0.00363128	-0.00731608	0.00173266	0.00729539	0.00528574	0	0	0	0	0	0	0	0	0	0	0	0	0	0	0	0
0	0	0	0	0	0	0	0	0	0	0	0	0	-0.136342	-0.0906264	-0.113381	-0.16643	-0.0199956	0.118022	0.061994	-0.0834454	-0.14071	-0.121923	0.0258708	0.186836	0.298955	0.355568	0.324264	0.263406	0.204857	0.155684	0.0833907	0.0598534	0.0344953	0.0260887	0	0	0	0	0	0	0	0	0	0	0	0	0	0	0
0	0	0	0	0	0	0	0	0	0	0	0	0	-0.071059	-0.0433109	-0.0155857	-0.0084021	-0.0281686	0.0324106	0.0608019	0.0120991	-0.00250895	0.0130581	-0.0029977	-0.014437	-0.00500819	0.000320807	0.00551191	0.0288766	0.00927006	-0.0216906	-0.00315911	0.0138634	-0.005029	0.00341686	0.00681766	0	0	0	0	0	0	0	0	0	0	0	0	0	0
0	0	0	0	0	0	0	0	0	0	0	0	0	0	-0.0540321	-0.00583696	0.0109193	0.0239691	0.0334903	0.0412517	0.0256495	-0.000766393	-8.8402e-05	0.00780008	-0.00277483	-0.00632471	-0.0057799	-0.0133715	-0.0415348	-0.0231879	-0.0269822	-0.0219036	-0.00300899	-0.0133705	-0.0142039	-0.0214285	-0.0191164	0.00987183	0	0	0	0	0	0	0	0	0	0	0	0
0	0	0	0	0	0	0	0	0	0	0	0	0	0	-0.0542497	0.0191719	0.0339468	0.0187958	0.031946	0.0463563	0.0386379	-0.0039103	0.00110347	0.00206975	-0.000914733	0.00101867	0.00404541	-0.0124736	-0.0228772	0.00286375	-0.00257251	-0.0137496	-0.00662094	-0.017484	-0.0190984	-0.0234178	-0.0269473	-0.00820672	0.00862431	0	0	0	0	0	0	0	0	0	0	0
0	0	0	0	0	0	0	0	0	0	0	0	0	-0.0791747	-0.0224717	0.0185923	0.0304085	0.0367711	0.0380201	0.0387773	0.04222	0.0176651	0.0115619	-0.00052367	-0.00804647	-0.00145609	-0.00421806	-0.0224932	-0.0198181	-0.00358944	-0.0104732	-0.019669	-0.010597	-0.0222156	-0.0286889	-0.0340024	-0.0289348	-0.0271561	0.00381803	0	0	0	0	0	0	0	0	0	0	0
0	0	0	0	0	0	0	0	0	0	0	0	0	-0.0717727	-0.0148754	0.0369562	0.0386394	0.0351263	0.03413	0.0306621	0.0340169	0.0230831	0.00978072	-0.00946425	-0.00711939	-0.00271868	0.00639995	-0.0164741	-0.0138395	-0.00327802	-0.0100348	-0.020373	-0.0191081	-0.0328686	-0.0306109	-0.0372582	-0.041134	-0.0266425	-0.00496007	0	0	0	0	0	0	0	0	0	0	0
0	0	0	0	0	0	0	0	0	0	0	0	0	-0.0480856	0.00700165	0.016527	0.0204064	0.0351547	0.0471291	0.0238451	0.0334581	0.0227458	0.0130793	-0.0135213	-0.00924082	-0.00554324	-0.00122078	-0.0163026	-0.0203089	-0.00228578	-0.0157037	-0.0237211	-0.0152973	-0.0380681	-0.0329444	-0.0341147	-0.0287936	-0.0243383	-0.00399744	0	0	0	0	0	0	0	0	0	0	0
0	0	0	0	0	0	0	0	0	0	0	0	0	-0.0578352	-0.010581	0.00847083	-0.00197668	0.00607196	0.0257712	0.000802178	0.00655069	0.00207006	-0.00319995	-0.0123473	-0.0185834	-0.0160735	-0.0142316	-0.0203015	-0.0245798	-0.0135371	-0.0195407	-0.0272077	-0.0269815	-0.0332503	-0.033375	-0.0394363	-0.034087	-0.0147508	0.00250951	0	0	0	0	0	0	0	0	0	0	0
0	0	0	0	0	0	0	0	0	0	0	0	0	0	-0.0359743	-0.00552011	-0.00419875	-0.0044527	-0.00405229	-0.0158114	-0.00525416	-0.0111794	-0.0110166	-0.0166489	-0.0133392	-0.0198665	-0.025251	-0.0212965	-0.0196232	-0.0118261	-0.0228238	-0.0411256	-0.0359513	-0.0333908	-0.0299042	-0.0290879	-0.0290952	-0.0173059	0.00275214	0	0	0	0	0	0	0	0	0	0	0
0	0	0	0	0	0	0	0	0	0	0	0	0	0	0	0	0.00312608	0.00447567	0.00685984	-0.000524153	0.00165394	0.00588733	-0.000259838	0.00233108	-0.0039386	-0.00462798	-0.00484325	-0.0161373	-0.00113023	0.0201715	-0.00981553	-0.0615174	-0.0147369	-0.00730446	-0.0148658	-0.0185864	-0.00477203	0.0333838	0	0	0	0	0	0	0	0	0	0	0	0
0	0	0	0	0	0	0	0	0	0	0	0	0	0	0	0	0	-0.0231582	-0.0102562	-0.0229105	-0.00903176	-0.0138786	-0.0197528	-0.0262719	-0.0130253	-0.0172782	-0.0175272	-0.0312317	-0.0269261	-0.0206515	-0.0483941	-0.0480583	-0.0358742	-0.0220294	-0.024179	-0.0150147	-0.00847161	0	0	0	0	0	0	0	0	0	0	0	0	0
0	0	0	0	0	0	0	0	0	0	0	0	0	0	0	0	0	0	-0.0215368	-0.0266885	-0.0165974	-0.0127179	-0.0178832	-0.019178	-0.0147846	-0.0180856	-0.0192902	-0.0291682	-0.0165435	-0.019286	-0.0418841	-0.0163727	-0.00270725	-0.0236098	-0.0220854	-0.0168259	0	0	0	0	0	0	0	0	0	0	0	0	0	0
0	0	0	0	0	0	0	0	0	0	0	0	0	0	0	0	0	0	0	-0.0383112	-0.0234847	-0.0211086	-0.0149331	-0.0233596	-0.0246581	-0.0241266	-0.0221218	-0.0222423	-0.0432063	-0.0542716	-0.0310377	-0.0111707	-0.0116382	-0.0197345	-0.0125362	0	0	0	0	0	0	0	0	0	0	0	0	0	0	0
0	0	0	0	0	0	0	0	0	0	0	0	0	0	0	0	0	0	0	0	0	-0.032374	-0.0229945	-0.0194409	-0.0187832	-0.0235512	-0.0161444	-0.0381317	-0.0374973	-0.0238461	-0.0257181	-0.0257094	-0.0103421	-0.0216047	0	0	0	0	0	0	0	0	0	0	0	0	0	0	0	0
0	0	0	0	0	0	0	0	0	0	0	0	0	0	0	0	0	0	0	0	0	0	0	-0.028881	-0.0323	-0.0258522	-0.0218835	-0.0264343	-0.0201218	-0.0163058	-0.0299179	-0.0326469	0	0	0	0	0	0	0	0	0	0	0	0	0	0	0	0	0	0
0	0	0	0	0	0	0	0	0	0	0	0	0	0	0	0	0	0	0	0	0	0	0	0	0	0	0	0	0	0	0	0	0	0	0	0	0	0	0	0	0	0	0	0	0	0	0	0	0	0
0	0	0	0	0	0	0	0	0	0	0	0	0	0	0	0	0	0	0	0	0	0	0	0	0	0	0	0	0	0	0	0	0	0	0	0	0	0	0	0	0	0	0	0	0	0	0	0	0	0
0	0	0	0	0	0	0	0	0	0	0	0	0	0	0	0	0	0	0	0	0	0	0	0	0	0	0	0	0	0	0	0	0	0	0	0	0	0	0	0	0	0	0	0	0	0	0	0	0	0
0	0	0	0	0	0	0	0	0	0	0	0	0	0	0	0	0	0	0	0	0	0	0	0	0	0	0	0	0	0	0	0	0	0	0	0	0	0	0	0	0	0	0	0	0	0	0	0	0	0
0	0	0	0	0	0	0	0	0	0	0	0	0	0	0	0	0	0	0	0	0	0	0	0	0	0	0	0	0	0	0	0	0	0	0	0	0	0	0	0	0	0	0	0	0	0	0	0	0	0
0	0	0	0	0	0	0	0	0	0	0	0	0	0	0	0	0	0	0	0	0	0	0	0	0	0	0	0	0	0	0	0	0	0	0	0	0	0	0	0	0	0	0	0	0	0	0	0	0	0
0	0	0	0	0	0	0	0	0	0	0	0	0	0	0	0	0	0	0	0	0	0	0	0	0	0	0	0	0	0	0	0	0	0	0	0	0	0	0	0	0	0	0	0	0	0	0	0	0	0
0	0	0	0	0	0	0	0	0	0	0	0	0	0	0	0	0	0	0	0	0	0	0	0	0	0	0	0	0	0	0	0	0	0	0	0	0	0	0	0	0	0	0	0	0	0	0	0	0	0
0	0	0	0	0	0	0	0	0	0	0	0	0	0	0	0	0	0	0	0	0	0	0	0	0	0	0	0	0	0	0	0	0	0	0	0	0	0	0	0	0	0	0	0	0	0	0	0	0	0
0	0	0	0	0	0	0	0	0	0	0	0	0	0	0	0	0	0	0	0	0	0	0	0	0	0	0	0	0	0	0	0	0	0	0	0	0	0	0	0	0	0	0	0	0	0	0	0	0	0
0	0	0	0	0	0	0	0	0	0	0	0	0	0	0	0	0	0	0	0	0	0	0	0	0	0	0	0	0	0	0	0	0	0	0	0	0	0	0	0	0	0	0	0	0	0	0	0	0	0
0	0	0	0	0	0	0	0	0	0	0	0	0	0	0	0	0	0	0	0	0	0	0	0	0	0	0	0	0	0	0	0	0	0	0	0	0	0	0	0	0	0	0	0	0	0	0	0	0	0
0	0	0	0	0	0	0	0	0	0	0	0	0	0	0	0	0	0	0	0	0	0	0	0	0	0	0	0	0	0	0	0	0	0	0	0	0	0	0	0	0	0	0	0	0	0	0	0	0	0
0	0	0	0	0	0	0	0	0	0	0	0	0	0	0	0	0	0	0	0	0	0	0	0	0	0	0	0	0	0	0	0	0	0	0	0	0	0	0	0	0	0	0	0	0	0	0	0	0	0
0	0	0	0	0	0	0	0	0	0	0	0	0	0	0	0	0	0	0	0	0	0	0	0	0	0	0	0	0	0	0	0	0	0	0	0	0	0	0	0	0	0	0	0	0	0	0	0	0	0
0	0	0	0	0	0	0	0	0	0	0	0	0	0	0	0	0	0	0	0	0	0	0	0	0	0	0	0	0	0	0	0	0	0	0	0	0	0	0	0	0	0	0	0	0	0	0	0	0	0
0	0	0	0	0	0	0	0	0	0	0	0	0	0	0	0	0	0	0	0	0	0	0	0	0	0	0	0	0	0	0	0	0	0	0	0	0	0	0	0	0	0	0	0	0	0	0	0	0	0
0	0	0	0	0	0	0	0	0	0	0	0	0	0	0	0	0	0	0	0	0	0	0	0	0	0	0	0	0	0	0	0	0	0	0	0	0	0	0	0	0	0	0	0	0	0	0	0	0	0
0	0	0	0	0	0	0	0	0	0	0	0	0	0	0	0	0	0	0	0	0	0	0	0	0	0	0	0	0	0	0	0	0	0	0	0	0	0	0	0	0	0	0	0	0	0	0	0	0	0
0	0	0	0	0	0	0	0	0	0	0	0	0	0	0	0	0	0	0	0	0	0	0	0	0	0	0	0	0	0	0	0	0	0	0	0	0	0	0	0	0	0	0	0	0	0	0	0	0	0
0	0	0	0	0	0	0	0	0	0	0	0	0	0	0	0	0	0	0	0	0	0	0	0	0	0	0	0	0	0	0	0	0	0	0	0	0	0	0	0	0	0	0	0	0	0	0	0	0	0
0	0	0	0	0	0	0	0	0	0	0	0	0	0	0	0	0	0	0	0	0	0	0	0	0	0	0	0	0	0	0	0	0	0	0	0	0	0	0	0	0	0	0	0	0	0	0	0	0	0
0	0	0	0	0	0	0	0	0	0	0	0	0	0	0	0	0	0	0	0	0	0	0	0	0	0	0	0	0	0	0	0	0	0	0	0	0	0	0	0	0	0	0	0	0	0	0	0	0	0
0	0	0	0	0	0	0	0	0	0	0	0	0	0	0	0	0	0	0	0	0	0	0	0	0	0	0	0	0	0	0	0	0	0	0	0	0	0	0	0	0	0	0	0	0	0	0	0	0	0
0	0	0	0	0	0	0	0	0	0	0	0	0	0	0	0	0	0	0	0	0	0	0	0	0	0	0	0	0	0	0	0	0	0	0	0	0	0	0	0	0	0	0	0	0	0	0	0	0	0
0	0	0	0	0	0	0	0	0	0	0	0	0	0	0	0	0	0	0	0	-0.040615	-0.178725	-0.172166	-0.0374112	-0.121061	0	0	0	0	0	0	0	0	0	0	0	0	0	0	0	0	0	0	0	0	0	0	0	0	0
0	0	0	0	0	0	0	0	0	0	0	0	0	0	0	0	-0.0235858	-0.0051941	-0.00382864	0.00277164	0.0406579	0.0464717	0.0251551	-0.00437675	0.0258673	0.0373073	0.0411929	0.0315562	0.00187897	0.0438284	0	0	0	0	0	0	0	0	0	0	0	0	0	0	0	0	0	0	0	0
0	0	0	0	0	0	0	0	0	0	0	0	0	0	0	-0.015562	-0.00717346	-0.0131298	0.0109565	0.00399438	0.0359554	0.0597479	0.0251611	-0.00154744	0.0359196	0.0452631	0.0322147	0.0172071	0.0109972	0.0235883	0	0	0	0	0	0	0	0	0	0	0	0	0	0	0	0	0	0	0	0
0	0	0	0	0	0	0	0	0	0	0	0	0	0	-0.0333963	-0.00736499	-0.00773313	-0.0434557	0.00176814	0.0154791	0.049078	0.0449052	0.00760292	-0.0194941	0.00862762	0.0274468	0.0510572	0.0145251	-0.00205559	0.0271754	0	0	0	0	0	0	0	0	0	0	0	0	0	0	0	0	0	0	0	0
0	0	0	0	0	0	0	0	0	0	0	0	0	0	-0.0218508	-0.0143365	-0.00935828	-0.0127009	0.010395	0.0341006	0.0431596	0.0341755	0.00636982	-0.0170954	-0.00375031	0.0247687	0.0474783	0.0466758	0.0280686	0.00541713	0	0	0	0	0	0	0	0	0	0	0	0	0	0	0	0	0	0	0	0
0	0	0	0	0	0	0	0	0	0	0	0	0	0	-0.0297886	-0.00314402	0.00183765	-0.0116802	0.00593102	0.0315844	0.0393232	0.0247072	0.00726195	0.022956	0.000681986	0.00741516	0.0391483	0.027289	0.0343052	0.013933	0	0	0	0	0	0	0	0	0	0	0	0	0	0	0	0	0	0	0	0
0	0	0	0	0	0	0	0	0	0	0	0	0	0	-0.0335322	-0.0056955	-0.0061029	-0.0163804	-0.00741135	0.0130131	0.0274348	0.010548	-0.0111968	0.0241618	0.0118269	0.00845043	0.000234286	-0.00171266	0.0201732	0.0371982	0.0365002	0	0	0	0	0	0	0	0	0	0	0	0	0	0	0	0	0	0	0
0	0	0	0	0	0	0	0	0	0	0	0	0	0	-0.0189594	0.00242826	0.00236381	0.00348462	-0.000785108	-0.00894012	0.0140296	0.027794	-0.0200972	-0.0193471	0.047121	0.0311992	0.0179874	-0.0124718	-0.00311152	0.0377354	-0.0231495	0	0	0	0	0	0	0	0	0	0	0	0	0	0	0	0	0	0	0
0	0	0	0	0	0	0	0	0	0	0	0	0	0	-0.0275606	0.00314234	-0.00140782	-0.0102995	-0.0145829	-0.00789305	0.00676573	0.0197595	-0.0267289	-0.0620518	-0.0285992	0.037537	0.0255837	0.00728793	-0.0106405	0.0309112	-0.0460926	0.0397272	0	0	0	0	0	0	0	0	0	0	0	0	0	0	0	0	0	0
0	0	0	0	0	0	0	0	0	0	0	0	0	0	-0.0239657	-0.00896596	-0.00913518	-0.0117743	-0.0117474	-0.0211696	-0.0235537	-0.00632718	0.00178567	-0.0422668	-0.0309168	-0.0174992	0.0424198	0.0280963	-0.0262381	0.0165216	-0.0220221	-0.000789834	0	0	0	0	0	0	0	0	0	0	0	0	0	0	0	0	0	0
0	0	0	0	0	0	0	0	0	0	0	0	0	0	-0.0212479	-0.0103539	-0.0108478	-0.0156865	0.00104544	-0.00819438	-0.0224013	-0.0170657	0.00625383	-0.0514892	-0.0661458	-0.0251534	0.0282861	0.00746199	0.00293349	-0.00596923	-0.0259532	0.0352987	0	0	0	0	0	0	0	0	0	0	0	0	0	0	0	0	0	0
0	0	0	0	0	0	0	0	0	0	0	0	0	-0.0334939	-0.0226366	-0.0168446	-0.0195115	-0.0188321	-0.00951355	-0.0103976	-0.0282554	-0.0440132	-0.0254124	-0.0320956	-0.0653068	-0.0418667	0.0299131	0.00690192	-0.0106126	-0.0137346	-0.0356966	0.0288467	0.038172	0	0	0	0	0	0	0	0	0	0	0	0	0	0	0	0	0
0	0	0	0	0	0	0	0	0	0	0	0	0	0	-0.0214298	-0.0120164	-0.0125221	-0.0166974	-0.014065	-0.00840609	-0.00601135	-0.0300633	-0.037156	-0.000298954	-0.0465476	-0.0115309	0.0398533	0.0140255	-0.00849596	-0.0203091	-0.0320995	0.0107834	0.0287101	0	0	0	0	0	0	0	0	0	0	0	0	0	0	0	0	0
0	0	0	0	0	0	0	0	0	0	0	0	0	0	-0.022556	-0.021937	-0.0115235	-0.0194831	-0.0139105	-0.0128939	-0.00112983	-0.00909435	-0.0328308	-0.0580416	-0.0251848	0.000452548	-0.00977823	-0.00872553	0.00225788	0.00858891	-0.00627136	0.0170933	0.0125396	0	0	0	0	0	0	0	0	0	0	0	0	0	0	0	0	0
0	0	0	0	0	0	0	0	0	0	0	0	0	0	-0.027034	-0.0193318	-0.0220556	-0.0263308	-0.024353	-0.0244568	-0.0108669	-0.00454052	-0.0128537	-0.0246354	-0.138206	-0.0676762	0.0203366	-0.00899945	0.000106712	-0.00486184	-0.00204637	0.00169881	0.00699558	0.000506484	0	0	0	0	0	0	0	0	0	0	0	0	0	0	0	0
0	0	0	0	0	0	0	0	0	0	0	0	0	0	-0.029416	-0.0241942	-0.0263029	-0.0277898	-0.0286431	-0.0306891	-0.0231513	-0.0218572	-0.0187734	-0.036065	-0.0292711	-0.0405497	-0.0153739	-0.0307248	-0.0193003	0.00667175	-0.00307612	-0.00637852	0.00391556	-0.00462574	0	0	0	0	0	0	0	0	0	0	0	0	0	0	0	0
0	0	0	0	0	0	0	0	0	0	0	0	0	0	-0.0256901	-0.0278602	-0.0336289	-0.0359544	-0.0328846	-0.037185	-0.0295684	-0.0285488	-0.0202666	-0.0221289	-0.0215766	-0.0260081	-0.0179165	-0.0304306	-0.0163087	-0.00405031	-0.0141104	-0.013439	0.00374952	0	0	0	0	0	0	0	0	0	0	0	0	0	0	0	0	0
0	0	0	0	0	0	0	0	0	0	0	0	0	0	-0.0378492	-0.0285413	-0.0381699	-0.0329892	-0.0208173	-0.0193027	-0.0232921	-0.0235316	-0.0258649	-0.0218649	-0.00768392	-0.00549635	1.3143e-05	-0.0139429	-0.0060853	0.0133806	0.00954154	0.0071982	0	0	0	0	0	0	0	0	0	0	0	0	0	0	0	0	0	0
0	0	0	0	0	0	0	0	0	0	0	0	0	0	0	-0.0331886	-0.0332287	-0.0313911	-0.0109195	-0.0151943	-0.0120476	-0.0167179	-0.0153548	-0.0123183	-0.00249403	-0.0162634	-0.0049765	0.00302329	0.0149533	0.018019	0.00979288	0	0	0	0	0	0	0	0	0	0	0	0	0	0	0	0	0	0	0
0	0	0	0	0	0	0	0	0	0	0	0	0	0	0	-0.0327162	-0.0316769	-0.0302302	-0.0136976	-0.00755372	0.00252993	0.00944203	3.73249e-05	-0.00642684	-0.00148966	-0.0039452	0.000713481	0.0117246	0.0168552	0.0117358	0	0	0	0	0	0	0	0	0	0	0	0	0	0	0	0	0	0	0	0
0	0	0	0	0	0	0	0	0	0	0	0	0	0	0	0	-0.0287186	-0.0254502	-0.0268082	-0.00441856	-0.00231684	-0.000733036	-0.0120891	-0.00328471	-0.00748931	-0.00161806	0.00588601	0	0	0	0	0	0	0	0	0	0	0	0	0	0	0	0	0	0	0	0	0	0	0
0	0	0	0	0	0	0	0	0	0	0	0	0	0	0	0	0	0	0	0	0	0	0	0	0	0	0	0	0	0	0	0	0	0	0	0	0	0	0	0	0	0	0	0	0	0	0	0	0	0
0	0	0	0	0	0	0	0	0	0	0	0	0	0	0	0	0	0	0	0	0	0	0	0	0	0	0	0	0	0	0	0	0	0	0	0	0	0	0	0	0	0	0	0	0	0	0	0	0	0
0	0	0	0	0	0	0	0	0	0	0	0	0	0	0	0	0	0	0	0	0	0	0	0	0	0	0	0	0	0	0	0	0	0	0	0	0	0	0	0	0	0	0	0	0	0	0	0	0	0
0	0	0	0	0	0	0	0	0	0	0	0	0	0	0	0	0	0	0	0	0	0	0	0	0	0	0	0	0	0	0	0	0	0	0	0	0	0	0	0	0	0	0	0	0	0	0	0	0	0
0	0	0	0	0	0	0	0	0	0	0	0	0	0	0	0	0	0	0	0	0	0	0	0	0	0	0	0	0	0	0	0	0	0	0	0	0	0	0	0	0	0	0	0	0	0	0	0	0	0
0	0	0	0	0	0	0	0	0	0	0	0	0	0	0	0	0	0	0	0	0	0	0	0	0	0	0	0	0	0	0	0	0	0	0	0	0	0	0	0	0	0	0	0	0	0	0	0	0	0
0	0	0	0	0	0	0	0	0	0	0	0	0	0	0	0	0	0	0	0	0	0	0	0	0	0	0	0	0	0	0	0	0	0	0	0	0	0	0	0	0	0	0	0	0	0	0	0	0	0
0	0	0	0	0	0	0	0	0	0	0	0	0	0	0	0	0	0	0	0	0	0	0	0	0	0	0	0	0	0	0	0	0	0	0	0	0	0	0	0	0	0	0	0	0	0	0	0	0	0
0	0	0	0	0	0	0	0	0	0	0	0	0	0	0	0	0	0	0	0	0	0	0	0	0	0	0	0	0	0	0	0	0	0	0	0	0	0	0	0	0	0	0	0	0	0	0	0	0	0
0	0	0	0	0	0	0	0	0	0	0	0	0	0	0	0	0	0	0	0	0	0	0	0	0	0	0	0	0	0	0	0	0	0	0	0	0	0	0	0	0	0	0	0	0	0	0	0	0	0
0	0	0	0	0	0	0	0	0	0	0	0	0	0	0	0	0	0	0	0	0	0	0	0	0	0	0	0	0	0	0	0	0	0	0	0	0	0	0	0	0	0	0	0	0	0	0	0	0	0
0	0	0	0	0	0	0	0	0	0	0	0	0	0	0	0	0	0	0	0	0	0	0	0	0	0	0	0	0	0	0	0	0	0	0	0	0	0	0	0	0	0	0	0	0	0	0	0	0	0
0	0	0	0	0	0	0	0	0	0	0	0	0	0	0	0	0	0	0	0	0	0	0	0	0	0	0	0	0	0	0	0	0	0	0	0	0	0	0	0	0	0	0	0	0	0	0	0	0	0
0	0	0	0	0	0	0	0	0	0	0	0	0	0	0	0	0	0	0	0	0	0	0	0	0	0	0	0	0	0	0	0	0	0	0	0	0	0	0	0	0	0	0	0	0	0	0	0	0	0
0	0	0	0	0	0	0	0	0	0	0	0	0	0	0	0	0	0	0	0	0	0	0	0	0	0	0	0	0	0	0	0	0	0	0	0	0	0	0	0	0	0	0	0	0	0	0	0	0	0
0	0	0	0	0	0	0	0	0	0	0	0	0	0	0	0	0	0	0	0	0	0	0	0	0	0	0	0	0	0	0	0	0	0	0	0	0	0	0	0	0	0	0	0	0	0	0	0	0	0
0	0	0	0	0	0	0	0	0	0	0	0	0	0	0	0	0	0	0	0	0	0	0	0	0	0	0	0	0	0	0	0	0	0	0	0	0	0	0	0	0	0	0	0	0	0	0	0	0	0
0	0	0	0	0	0	0	0	0	0	0	0	0	0	0	0	0	0	0	0	0	0	0	0	0	0	0	0	0	0	0	0	0	0	0	0	0	0	0	0	0	0	0	0	0	0	0	0	0	0
0	0	0	0	0	0	0	0	0	0	0	0	0	0	0	0	0	0	0	0	0	0	0	0	0	0	0	0	0	0	0	0	0	0	0	0	0	0	0	0	0	0	0	0	0	0	0	0	0	0
0	0	0	0	0	0	0	0	0	0	0	0	0	0	0	0	0	0	0	0	0	0	0	0	0	0	0	0	0	0	0	0	0	0	0	0	0	0	0	0	0	0	0	0	0	0	0	0	0	0
0	0	0	0	0	0	0	0	0	0	0	0	0	0	0	0	0	0	0	0	0	0	0	0	0	0	0	0	0	0	0	0	0	0	0	0	0	0	0	0	0	0	0	0	0	0	0	0	0	0
0	0	0	0	0	0	0	0	0	0	0	0	0	0	0	0	0	0	0	0	0	0	0	0	0	0	0	0	0	0	0	0	0	0	0	0	0	0	0	0	0	0	0	0	0	0	0	0	0	0
0	0	0	0	0	0	0	0	0	0	0	0	0	0	0	0	0	0	0	0	0	0	0	0	0	0	0	0	0	0	0	0	0	0	0	0	0	0	0	0	0	0	0	0	0	0	0	0	0	0
0	0	0	0	0	0	0	0	0	0	0	0	0	0	0	0	0	0	0	0	0	0	0	0	0	0	0	0	0	0	0	0	0	0	0	0	0	0	0	0	0	0	0	0	0	0	0	0	0	0
0	0	0	0	0	0	0	0	0	0	0	0	0	0	0	0	0	0	0	0	0	0	0	0	0	0	0	0	0	0	0	0	0	0	0	0	0	0	0	0	0	0	0	0	0	0	0	0	0	0
0	0	0	0	0	0	0	0	0	0	0	0	0	0	0	0	0	0	0	0	0	0	0	0	0	0	0	-0.099935	-0.0615251	0	0	0	0	0	0	0	0	0	0	0	0	0	0	0	0	0	0	0	0	0
0	0	0	0	0	0	0	0	0	0	0	0	0	0	0	0	0	0	0	0	0	0	0	0	0	-0.0871942	-0.0640304	-0.0291619	-0.0449379	0.0293197	0	0	0	0	0	0	0	0	0	0	0	0	0	0	0	0	0	0	0	0
0	0	0	0	0	0	0	0	0	0	0	0	0	0	0	0	0	0	0	0	0	0	0	0	-0.0281971	-0.0124807	-0.00360435	-0.0197595	-0.0285014	0.00430013	0.0164836	0	0	0	0	0	0	0	0	0	0	0	0	0	0	0	0	0	0	0
0	0	0	0	0	0	0	0	0	0	0	0	0	0	0	0	0	0	0	-0.0568037	-0.0144661	-0.0106412	-0.00887496	-0.0132919	-0.0334037	-0.0246408	-0.00639033	-0.0212367	-0.0245958	-0.00493178	0.0468874	0.00694371	0	0	0	0	0	0	0	0	0	0	0	0	0	0	0	0	0	0
0	0	0	0	0	0	0	0	0	0	0	0	0	0	0	0	0	0	-0.0494383	-0.0251209	-0.0424284	-0.00366211	0.0258999	0.0175606	0.00221932	0.0056902	0.00932625	0.00813501	0.0201693	0.0594156	0.0520041	0.0251879	0.0268258	0	0	0	0	0	0	0	0	0	0	0	0	0	0	0	0	0
0	0	0	0	0	0	0	0	0	0	0	0	0	0	0	0	0	-0.0352223	-0.0511615	-0.0580935	-0.0298163	0.00830001	0.0122939	0.0132092	0.0238798	0.0328857	0.0245375	0.0231468	0.0369141	0.0467115	0.0342567	0.027379	0.0366316	0	0	0	0	0	0	0	0	0	0	0	0	0	0	0	0	0
0	0	0	0	0	0	0	0	0	0	0	0	0	0	0	0	0	-0.0434995	-0.0382306	-0.0441165	-0.0165175	0.0073903	0.011292	0.00247898	0.0381467	0.0505438	0.0336195	0.00699967	0.0246596	0.0539896	0.0167713	0.0237159	0.035799	0	0	0	0	0	0	0	0	0	0	0	0	0	0	0	0	0
0	0	0	0	0	0	0	0	0	0	0	0	0	0	0	0	-0.0265764	-0.0328987	-0.0413991	0.000176255	-0.0121684	0.0148167	0.0141247	0.0119488	0.0188374	0.0206622	0.0304986	0.0396954	0.0741744	0.070244	0.00616365	-0.00902505	0.0536461	0.0562929	0	0	0	0	0	0	0	0	0	0	0	0	0	0	0	0
0	0	0	0	0	0	0	0	0	0	0	0	0	0	0	0	-0.029545	-0.025619	-0.00345785	0.01199	-0.0345312	-0.0114085	-0.0205039	-0.00378483	-0.00873404	0.0188474	0.0267057	0.0405768	0.0461385	0.0450761	0.0366495	-0.0134086	0.0129381	0.0205726	0	0	0	0	0	0	0	0	0	0	0	0	0	0	0	0
0	0	0	0	0	0	0	0	0	0	0	0	0	0	0	0	-0.0257401	-0.0376531	-0.0258033	0.0103487	-0.0115332	-0.0246404	-0.0350403	0.0146324	-0.015482	0.0306978	0.0096377	0.0216959	0.0380466	0.0474377	0.0532664	-0.0108181	-0.0246139	0.0134912	0	0	0	0	0	0	0	0	0	0	0	0	0	0	0	0
0	0	0	0	0	0	0	0	0	0	0	0	0	0	0	0	-0.0324033	-0.0339163	-0.036824	-0.0190899	-0.0169968	-0.00821117	-0.0231295	-0.018563	0.0249695	0.0401366	0.0332756	0.0282989	0.0261804	0.0410809	0.0279542	0.00265333	0.00292643	-0.00413815	0.0118249	0	0	0	0	0	0	0	0	0	0	0	0	0	0	0
0	0	0	0	0	0	0	0	0	0	0	0	0	0	0	-0.0183584	-0.0293434	-0.0331892	-0.00497103	-0.0234684	-0.0255528	0.00689478	-0.00115742	-0.0014039	0.0267927	0.0109745	0.0126178	0.0518969	0.0277572	0.0223026	0.0147223	0.00690066	0.00172912	0.000974691	0.0102049	0	0	0	0	0	0	0	0	0	0	0	0	0	0	0
0	0	0	0	0	0	0	0	0	0	0	0	0	0	0	-0.0743516	-0.0446636	-0.0307752	-0.0177303	0.0116342	0.0251715	-0.0246324	-0.00935361	0.0766643	0.096233	0.104739	0.118238	0.055781	0.0564374	0.0705635	0.0495771	0.0266586	0.0433615	0.0302752	0.0318097	0	0	0	0	0	0	0	0	0	0	0	0	0	0	0
0	0	0	0	0	0	0	0	0	0	0	0	0	0	-0.0134917	-0.00506904	-0.0165662	-0.0366144	-0.0229205	-0.0213513	-0.0242731	-0.0307879	-0.0224409	-0.0308236	-0.0117751	0.00556726	-0.000277335	-0.0080414	0.000650817	0.0221152	0.00737517	0.000695005	0.00969766	-0.00051005	0.00674023	0	0	0	0	0	0	0	0	0	0	0	0	0	0	0
0	0	0	0	0	0	0	0	0	0	0	0	0	-0.0236601	-0.0147595	-0.0148132	-0.0216493	-0.0308592	-0.0333611	-0.0242947	-0.0218469	-0.0232903	-0.0351107	-0.02844	-0.0225708	-0.0199336	-0.00886071	-0.014805	-0.00832257	-0.00312622	-0.000790887	0.00277345	0.000622797	-0.0134158	-0.00359369	0	0	0	0	0	0	0	0	0	0	0	0	0	0	0
0	0	0	0	0	0	0	0	0	0	0	0	0	-0.0169707	-0.012426	-0.0145806	-0.0314473	-0.0363876	-0.0293834	-0.0298938	-0.0267281	-0.0248935	-0.0258953	-0.0410477	-0.0216266	-0.0137914	-0.00597769	-0.0112349	-0.0037215	0.00487541	0.000671912	0.00789016	0.0101196	-0.00739669	-0.000246488	0	0	0	0	0	0	0	0	0	0	0	0	0	0	0
0	0	0	0	0	0	0	0	0	0	0	0	0	-0.0166361	-0.00482378	-0.0157884	-0.0275262	-0.0262503	-0.0163995	-0.0282557	-0.0200442	-0.0189068	-0.0229025	-0.0308849	-0.0200921	-0.0142127	-0.00935148	-0.0099248	-0.0131918	0.000819978	0.000176376	0.00480273	0.00700687	-0.00371879	0.00364639	0	0	0	0	0	0	0	0	0	0	0	0	0	0	0
0	0	0	0	0	0	0	0	0	0	0	0	0	-0.0147237	-0.0109421	-0.0214786	-0.0419438	-0.0373428	-0.0292511	-0.0321902	-0.0269725	-0.0294179	-0.0271264	-0.0275826	-0.0233697	-0.0180743	-0.0171671	-0.0205277	-0.0167065	-0.00516777	-0.010495	-0.00326969	0.00718456	-0.00533282	-0.00243199	0	0	0	0	0	0	0	0	0	0	0	0	0	0	0
0	0	0	0	0	0	0	0	0	0	0	0	0	-0.0223187	-0.0142329	-0.0194186	-0.0395685	-0.0365242	-0.033963	-0.0417555	-0.0337173	-0.0332653	-0.0275	-0.0257532	-0.0271288	-0.020123	-0.020283	-0.0239938	-0.0190896	-0.0079495	-0.0167107	-0.0141494	0.0115048	0.00537435	0.0019755	0	0	0	0	0	0	0	0	0	0	0	0	0	0	0
0	0	0	0	0	0	0	0	0	0	0	0	0	-0.0269482	-0.017206	-0.024705	-0.0365984	-0.0347739	-0.0429413	-0.0406964	-0.0361456	-0.032624	-0.0276938	-0.0344939	-0.0326904	-0.0269962	-0.0263185	-0.028709	-0.0207518	-0.00787555	-0.0210438	-0.0196083	0.00598445	0.00687578	-0.00142712	0	0	0	0	0	0	0	0	0	0	0	0	0	0	0
0	0	0	0	0	0	0	0	0	0	0	0	0	-0.0348029	-0.0211235	-0.0274219	-0.0392452	-0.0437911	-0.0419077	-0.0415268	-0.0306257	-0.0360603	-0.0267869	-0.0333016	-0.0311321	-0.0317059	-0.0257202	-0.0328009	-0.0260053	-0.0113956	-0.0179194	-0.0281765	-0.0100997	-0.00562689	0.00233244	0	0	0	0	0	0	0	0	0	0	0	0	0	0	0
0	0	0	0	0	0	0	0	0	0	0	0	0	0	-0.0342408	-0.0355534	-0.0425842	-0.0442449	-0.0395056	-0.0412846	-0.0325221	-0.0365413	-0.0317658	-0.0400653	-0.0348501	-0.0263349	-0.0306518	-0.0335697	-0.0296464	-0.0142396	-0.0236903	-0.030083	-0.00869527	0.000953845	0	0	0	0	0	0	0	0	0	0	0	0	0	0	0	0
0	0	0	0	0	0	0	0	0	0	0	0	0	0	0	-0.0429428	-0.0446886	-0.0414091	-0.0364022	-0.0458416	-0.0412371	-0.0391211	-0.0405143	-0.045248	-0.0418248	-0.0428404	-0.0308874	-0.0406427	-0.0268189	-0.0124151	-0.0192563	-0.0185324	-0.00076962	0	0	0	0	0	0	0	0	0	0	0	0	0	0	0	0	0
0	0	0	0	0	0	0	0	0	0	0	0	0	0	0	0	0	0	0	0	-0.0357687	-0.0394992	-0.0409598	-0.0450134	-0.0401384	-0.0365466	-0.0299692	-0.0288815	0	0	0	0	0	0	0	0	0	0	0	0	0	0	0	0	0	0	0	0	0	0
0	0	0	0	0	0	0	0	0	0	0	0	0	0	0	0	0	0	0	0	0	0	0	0	0	0	0	0	0	0	0	0	0	0	0	0	0	0	0	0	0	0	0	0	0	0	0	0	0	0
0	0	0	0	0	0	0	0	0	0	0	0	0	0	0	0	0	0	0	0	0	0	0	0	0	0	0	0	0	0	0	0	0	0	0	0	0	0	0	0	0	0	0	0	0	0	0	0	0	0
0	0	0	0	0	0	0	0	0	0	0	0	0	0	0	0	0	0	0	0	0	0	0	0	0	0	0	0	0	0	0	0	0	0	0	0	0	0	0	0	0	0	0	0	0	0	0	0	0	0
0	0	0	0	0	0	0	0	0	0	0	0	0	0	0	0	0	0	0	0	0	0	0	0	0	0	0	0	0	0	0	0	0	0	0	0	0	0	0	0	0	0	0	0	0	0	0	0	0	0
0	0	0	0	0	0	0	0	0	0	0	0	0	0	0	0	0	0	0	0	0	0	0	0	0	0	0	0	0	0	0	0	0	0	0	0	0	0	0	0	0	0	0	0	0	0	0	0	0	0
0	0	0	0	0	0	0	0	0	0	0	0	0	0	0	0	0	0	0	0	0	0	0	0	0	0	0	0	0	0	0	0	0	0	0	0	0	0	0	0	0	0	0	0	0	0	0	0	0	0
0	0	0	0	0	0	0	0	0	0	0	0	0	0	0	0	0	0	0	0	0	0	0	0	0	0	0	0	0	0	0	0	0	0	0	0	0	0	0	0	0	0	0	0	0	0	0	0	0	0
0	0	0	0	0	0	0	0	0	0	0	0	0	0	0	0	0	0	0	0	0	0	0	0	0	0	0	0	0	0	0	0	0	0	0	0	0	0	0	0	0	0	0	0	0	0	0	0	0	0
0	0	0	0	0	0	0	0	0	0	0	0	0	0	0	0	0	0	0	0	0	0	0	0	0	0	0	0	0	0	0	0	0	0	0	0	0	0	0	0	0	0	0	0	0	0	0	0	0	0
0	0	0	0	0	0	0	0	0	0	0	0	0	0	0	0	0	0	0	0	0	0	0	0	0	0	0	0	0	0	0	0	0	0	0	0	0	0	0	0	0	0	0	0	0	0	0	0	0	0
0	0	0	0	0	0	0	0	0	0	0	0	0	0	0	0	0	0	0	0	0	0	0	0	0	0	0	0	0	0	0	0	0	0	0	0	0	0	0	0	0	0	0	0	0	0	0	0	0	0
0	0	0	0	0	0	0	0	0	0	0	0	0	0	0	0	0	0	0	0	0	0	0	0	0	0	0	0	0	0	0	0	0	0	0	0	0	0	0	0	0	0	0	0	0	0	0	0	0	0
0	0	0	0	0	0	0	0	0	0	0	0	0	0	0	0	0	0	0	0	0	0	0	0	0	0	0	0	0	0	0	0	0	0	0	0	0	0	0	0	0	0	0	0	0	0	0	0	0	0
0	0	0	0	0	0	0	0	0	0	0	0	0	0	0	0	0	0	0	0	0	0	0	0	0	0	0	0	0	0	0	0	0	0	0	0	0	0	0	0	0	0	0	0	0	0	0	0	0	0
0	0	0	0	0	0	0	0	0	0	0	0	0	0	0	0	0	0	0	0	0	0	0	0	0	0	0	0	0	0	0	0	0	0	0	0	0	0	0	0	0	0	0	0	0	0	0	0	0	0
0	0	0	0	0	0	0	0	0	0	0	0	0	0	0	0	0	0	0	0	0	0	0	0	0	0	0	0	0	0	0	0	0	0	0	0	0	0	0	0	0	0	0	0	0	0	0	0	0	0
0	0	0	0	0	0	0	0	0	0	0	0	0	0	0	0	0	0	0	0	0	0	0	0	0	0	0	0	0	0	0	0	0	0	0	0	0	0	0	0	0	0	0	0	0	0	0	0	0	0
0	0	0	0	0	0	0	0	0	0	0	0	0	0	0	0	0	0	0	0	0	0	0	0	0	0	0	0	0	0	0	0	0	0	0	0	0	0	0	0	0	0	0	0	0	0	0	0	0	0
0	0	0	0	0	0	0	0	0	0	0	0	0	0	0	0	0	0	0	0	0	0	0	0	0	0	0	0	0	0	0	0	0	0	0	0	0	0	0	0	0	0	0	0	0	0	0	0	0	0
0	0	0	0	0	0	0	0	0	0	0	0	0	0	0	0	0	0	0	0	0	0	0	0	0	0	0	0	0	0	0	0	0	0	0	0	0	0	0	0	0	0	0	0	0	0	0	0	0	0
0	0	0	0	0	0	0	0	0	0	0	0	0	0	0	0	0	0	0	0	0	0	0	0	0	0	0	0	0	0	0	0	0	0	0	0	0	0	0	0	0	0	0	0	0	0	0	0	0	0
0	0	0	0	0	0	0	0	0	0	0	0	0	0	0	0	0	0	0	0	0	0	0	0	0	0	0	0	0	0	0	0	0	0	0	0	0	0	0	0	0	0	0	0	0	0	0	0	0	0
0	0	0	0	0	0	0	0	0	0	0	0	0	0	0	0	0	0	0	0	0	0	0	0	0	0	0	0	0	0	0	0	0	0	0	0	0	0	0	0	0	0	0	0	0	0	0	0	0	0
0	0	0	0	0	0	0	0	0	0	0	0	0	0	0	0	0	0	0	0	0	0	0	0	0	0	0	0	0	0	0	0	0	0	0	0	0	0	0	0	0	0	0	0	0	0	0	0	0	0
0	0	0	0	0	0	0	0	0	0	0	0	0	0	0	0	0	0	0	0	0	0	0	0	0	0	0	0	0	0	0	0	0	0	0	0	0	0	0	0	0	0	0	0	0	0	0	0	0	0
0	0	0	0	0	0	0	0	0	0	0	0	0	0	0	0	0	0	0	0	0	0	0	0	0	0	0	0	0	0	0	0	0	0	0	0	0	0	0	0	0	0	0	0	0	0	0	0	0	0
0	0	0	0	0	0	0	0	0	0	0	0	0	0	0	0	0	0	0	0	0	0	0	0	0	0	0	0	0	0	0	0	0	0	0	0	0	0	0	0	0	0	0	0	0	0	0	0	0	0
0	0	0	0	0	0	0	0	0	0	0	0	0	0	0	0	0	0	0	0	0	0	0	0	0	0	0	0	0	0	0	0	0	0	0	0	0	0	0	0	0	0	0	0	0	0	0	0	0	0
0	0	0	0	0	0	0	0	0	0	0	0	0	0	0	0	0	0	0	0	0	0	0	0	0	0	0	0	0	0	0	0	0	0	0	0	0	0	0	0	0	0	0	0	0	0	0	0	0	0
0	0	0	0	0	0	0	0	0	0	0	0	0	0	0	0	0	0	0	0	0	0	0	0	0	0	-0.0319399	-0.0541707	-0.0725665	-0.0512882	-0.0491179	-0.0392849	-0.0242966	-0.0503931	-0.0499162	0	0	0	0	0	0	0	0	0	0	0	0	0	0	0
0	0	0	0	0	0	0	0	0	0	0	0	0	0	0	0	0	0	0	0	0	0	0	0	-0.0179035	-0.0173834	-0.0126826	-0.0215301	-0.0159712	-0.00964048	-0.0232251	-0.0313142	-0.0192878	-0.0231854	-0.0121654	-0.00798721	0	0	0	0	0	0	0	0	0	0	0	0	0	0
0	0	0	0	0	0	0	0	0	0	0	0	0	0	0	0	0	0	0	0	0	0	-0.0276924	-0.0163517	-0.0146834	-0.0296958	-0.0070695	-0.0153424	-0.044127	-0.0497255	-0.0545755	-0.0328913	-0.00138674	-0.0179387	-0.0171344	-0.00918746	0.00174978	0.00961935	0	0	0	0	0	0	0	0	0	0	0	0
0	0	0	0	0	0	0	0	0	0	0	0	0	0	0	0	0	0	0	0	0	-0.0230781	-0.0158526	-0.0192613	-0.0112669	-0.00951671	-0.0072892	-0.0198435	-0.0101821	-0.00881637	-0.031342	-0.0318832	-0.00882975	-0.0058865	0.00132617	-0.000629269	0.000493615	0.0125341	0.0111294	0	0	0	0	0	0	0	0	0	0	0
0	0	0	0	0	0	0	0	0	0	0	0	0	0	0	0	0	0	0	0	-0.0242431	-0.0295692	-0.0302092	-0.0203041	-0.0123917	-0.00877662	-0.0143619	-0.0258531	-0.0249682	-0.00771842	-0.0198491	-0.0388896	-0.00894881	-0.0110424	-0.00764604	-0.0136035	-0.00648111	-0.000669397	0.00556842	0.0033436	0	0	0	0	0	0	0	0	0	0
0	0	0	0	0	0	0	0	0	0	0	0	0	0	0	0	0	0	0	-0.0199202	-0.0450393	-0.0347365	-0.0275362	0.000722661	-0.0191909	-0.0182896	0.00963168	-0.0351713	-0.0256784	-0.00653361	-0.0157065	-0.0262442	0.0118134	-0.0269484	-0.0232345	-0.00347265	-0.00572398	-0.0101279	0.000362977	0.00589538	0	0	0	0	0	0	0	0	0	0
0	0	0	0	0	0	0	0	0	0	0	0	0	0	0	0	0	0	-0.0152589	-0.0211256	-0.046976	-0.00790315	-0.00973953	-0.00424335	0.0123986	-0.00704789	-0.00841198	-0.0180017	-0.00287146	-0.0162839	-0.013782	-0.0150632	0.00778002	-0.0289493	-0.0223197	0.00515916	-0.00505563	-0.0109147	-0.00349649	0.00926078	0	0	0	0	0	0	0	0	0	0
0	0	0	0	0	0	0	0	0	0	0	0	0	0	0	0	0	0.225787	0.298387	0.141065	0.0124547	-0.0196076	0.00432518	0.114192	0.148902	0.0696352	-0.0418285	-0.108486	0.0083818	-0.0153348	-0.0303965	-0.0439792	-0.0322712	-0.0682304	-0.0474544	-0.0315779	-0.0352392	-0.0393206	-0.0407892	-0.0124815	-0.00904105	0	0	0	0	0	0	0	0	0
0	0	0	0	0	0	0	0	0	0	0	0	0	0	0	0	-0.0454488	0.00369221	-0.00113862	-0.00550084	0.00781929	0.0333715	0.00763929	-0.00255294	-0.00638203	-0.00186683	0.00809838	-0.00403002	-0.00901398	-0.00593285	-0.0171846	-0.0172607	0.0108458	-0.00564849	-0.00919666	-0.0185428	-0.0193006	-0.00949083	-0.0126622	-0.00636855	0.00348038	0	0	0	0	0	0	0	0	0
0	0	0	0	0	0	0	0	0	0	0	0	0	0	0	-0.034301	0.00035543	0.0250296	-0.0167503	0.00489216	0.0358813	0.0177644	0.0207039	0.00140834	0.00923346	0.0120152	0.0194136	-0.00766297	-0.00650553	0.00093398	-0.0148496	0.00329442	0.00877519	-0.00944337	-0.0129083	-0.0158434	-0.0125261	-0.0180768	-0.0185748	-0.00163008	0	0	0	0	0	0	0	0	0	0
0	0	0	0	0	0	0	0	0	0	0	0	0	0	0	-0.0358567	0.00430302	0.00679626	0.0287971	0.0154228	0.00309586	0.00471415	0.0266412	0.00439834	0.0126003	0.00936893	0.00792457	-0.00118931	0.000547238	0.00883605	-0.00290484	-0.00474934	0.0062262	-0.0113265	-0.0139368	-0.0105525	-0.0156592	-0.0115838	-0.000682921	-0.0016862	0	0	0	0	0	0	0	0	0	0
0	0	0	0	0	0	0	0	0	0	0	0	0	0	0	-0.0235529	0.00526849	0.000838786	0.0344678	0.0169844	0.0022981	0.00265281	0.0233323	0.00703666	0.000606531	0.0079812	0.0235192	0.00965695	0.00817889	0.0115989	-0.00908779	0.00493514	0.00999345	-0.0176145	0.00195755	0.00828006	0.0137531	0.00830982	-0.00534941	0	0	0	0	0	0	0	0	0	0	0
0	0	0	0	0	0	0	0	0	0	0	0	0	0	0	-0.0370373	0.00788927	0.0170156	0.019172	0.00462325	-0.00216785	0.0241633	0.0388885	0.0189479	0.0084051	0.023805	0.0358442	0.0110962	0.024901	0.0147231	0.00333961	-0.00786499	-0.0152686	-0.0271391	0.00999462	0.00612683	-0.00133958	-0.00405374	-0.00307317	0	0	0	0	0	0	0	0	0	0	0
0	0	0	0	0	0	0	0	0	0	0	0	0	0	0	0	-0.0370996	-0.00130315	0.0439945	0.0175902	-0.00108141	0.022601	0.0287667	0.0255377	0.0302361	0.0161759	0.0143872	0.00641181	0.0161435	0.00282401	-0.0031547	-0.00927911	0.00328811	0.00818156	0.00919019	0.00367637	-0.00586429	0	0	0	0	0	0	0	0	0	0	0	0	0
0	0	0	0	0	0	0	0	0	0	0	0	0	0	0	0	-0.0520152	-0.0104744	0.0231003	0.0217459	-0.0051502	0.0442068	0.0682673	0.0444874	0.0404158	0.0158393	0.0177582	-0.00127382	-0.00943992	0.0113625	0.00481288	0.00597781	0.0211152	0	0	0	0	0	0	0	0	0	0	0	0	0	0	0	0	0
0	0	0	0	0	0	0	0	0	0	0	0	0	0	0	0	0	-0.0336538	-0.0342889	0.0222923	-0.0125962	0.00975911	0.0358818	0.0330531	0.0234572	0.01433	0.0042802	0.00145886	0.0154929	0.0210874	0.00539668	0	0	0	0	0	0	0	0	0	0	0	0	0	0	0	0	0	0	0
0	0	0	0	0	0	0	0	0	0	0	0	0	0	0	0	0	0	0	0	-0.0165189	0.00874144	0.028184	0.0209112	-0.000133845	-0.00732633	0.0268576	0	0	0	0	0	0	0	0	0	0	0	0	0	0	0	0	0	0	0	0	0	0	0
0	0	0	0	0	0	0	0	0	0	0	0	0	0	0	0	0	0	0	0	0	0	0	0	0	0	0	0	0	0	0	0	0	0	0	0	0	0	0	0	0	0	0	0	0	0	0	0	0	0
0	0	0	0	0	0	0	0	0	0	0	0	0	0	0	0	0	0	0	0	0	0	0	0	0	0	0	0	0	0	0	0	0	0	0	0	0	0	0	0	0	0	0	0	0	0	0	0	0	0
0	0	0	0	0	0	0	0	0	0	0	0	0	0	0	0	0	0	0	0	0	0	0	0	0	0	0	0	0	0	0	0	0	0	0	0	0	0	0	0	0	0	0	0	0	0	0	0	0	0
0	0	0	0	0	0	0	0	0	0	0	0	0	0	0	0	0	0	0	0	0	0	0	0	0	0	0	0	0	0	0	0	0	0	0	0	0	0	0	0	0	0	0	0	0	0	0	0	0	0
0	0	0	0	0	0	0	0	0	0	0	0	0	0	0	0	0	0	0	0	0	0	0	0	0	0	0	0	0	0	0	0	0	0	0	0	0	0	0	0	0	0	0	0	0	0	0	0	0	0
0	0	0	0	0	0	0	0	0	0	0	0	0	0	0	0	0	0	0	0	0	0	0	0	0	0	0	0	0	0	0	0	0	0	0	0	0	0	0	0	0	0	0	0	0	0	0	0	0	0
0	0	0	0	0	0	0	0	0	0	0	0	0	0	0	0	0	0	0	0	0	0	0	0	0	0	0	0	0	0	0	0	0	0	0	0	0	0	0	0	0	0	0	0	0	0	0	0	0	0
0	0	0	0	0	0	0	0	0	0	0	0	0	0	0	0	0	0	0	0	0	0	0	0	0	0	0	0	0	0	0	0	0	0	0	0	0	0	0	0	0	0	0	0	0	0	0	0	0	0
0	0	0	0	0	0	0	0	0	0	0	0	0	0	0	0	0	0	0	0	0	0	0	0	0	0	0	0	0	0	0	0	0	0	0	0	0	0	0	0	0	0	0	0	0	0	0	0	0	0
0	0	0	0	0	0	0	0	0	0	0	0	0	0	0	0	0	0	0	0	0	0	0	0	0	0	0	0	0	0	0	0	0	0	0	0	0	0	0	0	0	0	0	0	0	0	0	0	0	0
0	0	0	0	0	0	0	0	0	0	0	0	0	0	0	0	0	0	0	0	0	0	0	0	0	0	0	0	0	0	0	0	0	0	0	0	0	0	0	0	0	0	0	0	0	0	0	0	0	0
0	0	0	0	0	0	0	0	0	0	0	0	0	0	0	0	0	0	0	0	0	0	0	0	0	0	0	0	0	0	0	0	0	0	0	0	0	0	0	0	0	0	0	0	0	0	0	0	0	0
0	0	0	0	0	0	0	0	0	0	0	0	0	0	0	0	0	0	0	0	0	0	0	0	0	0	0	0	0	0	0	0	0	0	0	0	0	0	0	0	0	0	0	0	0	0	0	0	0	0
0	0	0	0	0	0	0	0	0	0	0	0	0	0	0	0	0	0	0	0	0	0	0	0	0	0	0	0	0	0	0	0	0	0	0	0	0	0	0	0	0	0	0	0	0	0	0	0	0	0
0	0	0	0	0	0	0	0	0	0	0	0	0	0	0	0	0	0	0	0	0	0	0	0	0	0	0	0	0	0	0	0	0	0	0	0	0	0	0	0	0	0	0	0	0	0	0	0	0	0
0	0	0	0	0	0	0	0	0	0	0	0	0	0	0	0	0	0	0	0	0	0	0	0	0	0	0	0	0	0	0	0	0	0	0	0	0	0	0	0	0	0	0	0	0	0	0	0	0	0
0	0	0	0	0	0	0	0	0	0	0	0	0	0	0	0	0	0	0	0	0	0	0	0	0	0	0	0	0	0	0	0	0	0	0	0	0	0	0	0	0	0	0	0	0	0	0	0	0	0
0	0	0	0	0	0	0	0	0	0	0	0	0	0	0	0	0	0	0	0	0	0	0	0	0	0	0	0	0	0	0	0	0	0	0	0	0	0	0	0	0	0	0	0	0	0	0	0	0	0
0	0	0	0	0	0	0	0	0	0	0	0	0	0	0	0	0	0	0	0	0	0	0	0	0	0	0	0	0	0	0	0	0	0	0	0	0	0	0	0	0	0	0	0	0	0	0	0	0	0
0	0	0	0	0	0	0	0	0	0	0	0	0	0	0	0	0	0	0	0	0	0	0	0	0	0	0	0	0	0	0	0	0	0	0	0	0	0	0	0	0	0	0	0	0	0	0	0	0	0
0	0	0	0	0	0	0	0	0	0	0	0	0	0	0	0	0	0	0	0	0	0	0	0	0	0	0	0	0	0	0	0	0	0	0	0	0	0	0	0	0	0	0	0	0	0	0	0	0	0
0	0	0	0	0	0	0	0	0	0	0	0	0	0	0	0	0	0	0	-0.119615	-0.112533	-0.0514365	0	0	0	0	0	0	0	0	0	0	0	0	0	0	0	0	0	0	0	0	0	0	0	0	0	0	0	0
0	0	0	0	0	0	0	0	0	0	0	0	0	0	0	0	0	0	0	-0.0899781	-0.0454318	-0.0175551	-0.00190168	0	0	0	0	0	0	0	0	0	0	0	0	0	0	0	0	0	0	0	0	0	0	0	0	0	0	0
0	0	0	0	0	0	0	0	0	0	0	0	0	0	0	0	0	0	-0.0656634	-0.0132204	0.0265432	0.0242645	-0.0125852	-0.0317061	-0.0243939	-0.016926	0.0147297	0.0173776	0.0415852	0.0207733	0.00784377	0	0	0	0	0	0	0	0	0	0	0	0	0	0	0	0	0	0	0
0	0	0	0	0	0	0	0	0	0	0	0	0	0	0	0	0	0.122448	0.0585696	0.0784814	0.100612	0.0545111	0.0412324	0.0239998	-0.0137497	-0.00604809	0.0306866	0.0536531	0.0616515	0.0699234	0.139032	0.120105	0	0	0	0	0	0	0	0	0	0	0	0	0	0	0	0	0	0
0	0	0	0	0	0	0	0	0	0	0	0	0	0	0	-0.0217927	-0.0129971	-0.025201	-0.0279482	0.0143668	0.00519889	-0.0171695	6.4812e-05	0.00341877	-0.041286	-0.0168504	0.0367189	0.0229789	0.020072	0.0237521	-0.0314656	0.0105297	0.0406891	0.0220154	0	0	0	0	0	0	0	0	0	0	0	0	0	0	0	0
0	0	0	0	0	0	0	0	0	0	0	0	0	0	-0.0478736	-0.0166692	-0.000132387	-0.00847865	-0.0244173	-0.00719798	0.00407506	0.00986785	0.0035107	-0.0205355	-0.0395902	-0.0063015	0.0420016	0.0349709	0.0401861	0.0265361	-0.00748714	-0.0123269	0.00848926	0.00512134	0	0	0	0	0	0	0	0	0	0	0	0	0	0	0	0
0	0	0	0	0	0	0	0	0	0	0	0	0	-0.0582058	-0.035891	-0.0134269	0.00758601	0.0141043	-0.00761742	0.00674043	0.0231846	0.0137965	0.00707732	0.0129187	0.00699044	-0.00119422	0.0314276	0.0219154	0.0328914	0.0272662	-0.000707211	-0.0230192	0.00532528	0.0100255	0.0186313	0	0	0	0	0	0	0	0	0	0	0	0	0	0	0
0	0	0	0	0	0	0	0	0	0	0	0	0	0	-0.0302964	0.00223146	0.00138861	0.00924737	-0.0147511	-0.00466692	0.0213621	0.0199022	0.00806549	0.00915776	0.0264719	-0.00690249	0.0156456	0.0317886	0.0264253	0.0189777	-0.00362311	-0.0213259	0.000955952	0.00561436	0.0089448	0	0	0	0	0	0	0	0	0	0	0	0	0	0	0
0	0	0	0	0	0	0	0	0	0	0	0	0	-0.0489345	-0.036357	-0.0401109	-0.0294703	0.00232502	-0.0111873	-0.00105489	0.00988983	0.00326917	-0.0101436	0.0129915	0.0164549	0.0184153	0.0648029	0.0360944	0.0264149	0.0133417	-0.000300593	-0.00484023	0.00402101	-0.00440921	0.0011482	0	0	0	0	0	0	0	0	0	0	0	0	0	0	0
0	0	0	0	0	0	0	0	0	0	0	0	0	-0.0308942	-0.0200243	-0.0159386	0.0115234	-0.00966143	-0.0187987	-0.00112438	-0.017167	-0.00971956	0.0032817	0.0272829	0.0211901	0.00325312	0.0212101	0.0030809	0.0139964	0.0140373	0.00510585	-0.00671963	0.000931464	-0.0012998	0.00729377	0.00823888	0	0	0	0	0	0	0	0	0	0	0	0	0	0
0	0	0	0	0	0	0	0	0	0	0	0	0	-0.0315333	-0.0150762	-0.000798863	-0.00666219	-0.0233357	-0.00891998	-0.0208912	-0.024513	0.0116696	0.0205116	0.00791551	-0.00629538	-0.00217737	0.0064082	-0.012567	0.00400085	0.00216664	-0.00527959	-0.0156882	5.00349e-05	-0.013272	0.00221142	0.00478993	0	0	0	0	0	0	0	0	0	0	0	0	0	0
0	0	0	0	0	0	0	0	0	0	0	0	-0.0353341	-0.0302592	-0.015501	-0.00718855	-0.00940842	-0.0184939	-0.00788621	-0.0156016	-0.0179832	0.0023494	-0.0180213	-0.0126723	-0.00194368	-0.00182832	-0.0103228	-0.0014125	0.00570874	0.0153538	-0.00220505	-0.00274427	-0.000217971	-0.0150831	0.00251622	-0.00537222	0	0	0	0	0	0	0	0	0	0	0	0	0	0
0	0	0	0	0	0	0	0	0	0	0	0	-0.037788	-0.0202243	-0.0169134	-0.00835796	-0.013285	-0.0200228	-0.0155232	-0.012926	-0.0150195	-0.00702836	-0.0219725	-0.0153285	-0.00077348	-0.00334763	-0.00305931	-0.00414446	0.00157566	0.00438429	-0.00361586	-0.00895031	-0.000250693	-0.00331979	0.00354731	-0.00185507	0	0	0	0	0	0	0	0	0	0	0	0	0	0
0	0	0	0	0	0	0	0	0	0	0	0	-0.033623	-0.0177923	-0.0152012	-0.016188	-0.0175155	-0.00589956	-0.00478455	-0.00967485	-0.00867421	-0.00847623	-0.0187209	-0.0162433	-0.0019853	-0.00598117	-0.00829812	-0.0124836	0.00577656	-0.0087803	-0.0151485	-0.00226475	0.00418741	-0.00290225	-0.00374795	-0.00401975	0	0	0	0	0	0	0	0	0	0	0	0	0	0
0	0	0	0	0	0	0	0	0	0	0	0	-0.0322852	-0.0143464	-0.00345518	-0.00516438	-0.0141502	-0.00248607	-0.0130998	-0.020883	-0.0144659	-0.0112754	-0.0190486	-0.0208196	9.55109e-05	-0.00536928	0.00194927	-0.0031056	-0.00336316	0.00751702	-0.00593169	-0.00574455	0.00543512	-0.00256443	-0.00460525	-0.00205736	-0.00819377	0	0	0	0	0	0	0	0	0	0	0	0	0
0	0	0	0	0	0	0	0	0	0	0	0	-0.0350337	-0.0196834	-0.0126215	-0.0184333	-0.0113922	-0.00738625	-0.00381214	-0.00434965	-0.00959052	-0.0249064	-0.0159348	-0.0220007	-0.0209855	-0.00750501	0.00554864	-0.00851206	-0.00628236	0.00536256	-0.00115268	-0.00470281	-0.00260762	-0.00423233	-0.00522357	-0.00773906	0	0	0	0	0	0	0	0	0	0	0	0	0	0
0	0	0	0	0	0	0	0	0	0	0	0	-0.128011	-0.0722123	-0.0133088	-0.0167824	-0.0304726	-0.0357223	-0.0458978	-0.0570428	-0.0604415	-0.166228	-0.229582	-0.208726	-0.112435	-0.0425011	-0.0272674	-0.0257687	-0.00341916	-0.00328191	-0.0135076	-0.00821685	0.00124111	-0.0124744	-0.0160619	-0.0241888	0	0	0	0	0	0	0	0	0	0	0	0	0	0
0	0	0	0	0	0	0	0	0	0	0	0	-0.0446058	-0.022606	0.000662857	-0.00478831	-0.0103385	-0.0106964	-0.0113046	-0.0107224	-0.00817346	-0.00742123	-0.00809114	-0.00945361	-0.00940644	-0.0054944	0.000409796	-0.0184508	-0.0140892	0.000579481	-0.0113103	-0.0180284	-0.00112656	-0.0127215	-0.00778543	0	0	0	0	0	0	0	0	0	0	0	0	0	0	0
0	0	0	0	0	0	0	0	0	0	0	0	-0.0548841	-0.0262091	-0.00490566	-0.00784633	-0.0166558	-0.018818	-0.0120478	-0.0104383	-0.014431	-0.00935018	-0.010583	-0.00688733	-0.00853659	-0.00928055	-0.00700909	-0.0140809	-0.0158131	-0.00938293	-0.0136758	-0.014485	-0.0010518	-0.0159531	-0.00140708	0	0	0	0	0	0	0	0	0	0	0	0	0	0	0
0	0	0	0	0	0	0	0	0	0	0	0	-0.0670011	-0.0225592	-0.0082484	-0.00954111	-0.0196612	-0.0112024	-0.0089523	-0.0189033	-0.0157747	-0.0171598	-0.0150385	-0.0111636	-0.0108242	-0.0131319	-0.0107941	-0.0219802	-0.0159128	-0.00404074	-0.0187438	-0.0179007	-0.00318539	-0.0123891	0	0	0	0	0	0	0	0	0	0	0	0	0	0	0	0
0	0	0	0	0	0	0	0	0	0	0	0	0	-0.0245559	-0.00878928	-0.0213486	-0.0237147	-0.0187061	-0.0150816	-0.0180798	-0.020534	-0.0203993	-0.0184323	-0.0150593	-0.0156942	-0.0191877	-0.0136049	-0.0213898	-0.0175029	-0.00940245	-0.0199019	-0.0251736	-0.0099471	-0.0112193	0	0	0	0	0	0	0	0	0	0	0	0	0	0	0	0
0	0	0	0	0	0	0	0	0	0	0	0	0	0	-0.0191462	-0.0205489	-0.0237646	-0.0193541	-0.0148579	-0.0143989	-0.0154473	-0.0200347	-0.0242515	-0.0199923	-0.0169728	-0.0126294	-0.0177453	-0.0255411	-0.0208882	-0.021859	-0.0251883	-0.0181284	0	0	0	0	0	0	0	0	0	0	0	0	0	0	0	0	0	0
0	0	0	0	0	0	0	0	0	0	0	0	0	0	0	0	-0.0336384	-0.026947	-0.0326477	-0.0405588	-0.038079	-0.0345648	-0.0306918	-0.0173147	-0.0134583	-0.0246621	-0.0241405	-0.025019	-0.0265076	0	0	0	0	0	0	0	0	0	0	0	0	0	0	0	0	0	0	0	0	0
0	0	0	0	0	0	0	0	0	0	0	0	0	0	0	0	0	-0.041286	-0.0296447	-0.0306726	-0.0325527	-0.0318323	-0.0291647	-0.0211291	-0.0216477	-0.0261208	-0.0216696	0	0	0	0	0	0	0	0	0	0	0	0	0	0	0	0	0	0	0	0	0	0	0
0	0	0	0	0	0	0	0	0	0	0	0	0	0	0	0	0	0	0	0	0	0	0	0	0	0	0	0	0	0	0	0	0	0	0	0	0	0	0	0	0	0	0	0	0	0	0	0	0	0
0	0	0	0	0	0	0	0	0	0	0	0	0	0	0	0	0	0	0	0	0	0	0	0	0	0	0	0	0	0	0	0	0	0	0	0	0	0	0	0	0	0	0	0	0	0	0	0	0	0
0	0	0	0	0	0	0	0	0	0	0	0	0	0	0	0	0	0	0	0	0	0	0	0	0	0	0	0	0	0	0	0	0	0	0	0	0	0	0	0	0	0	0	0	0	0	0	0	0	0
0	0	0	0	0	0	0	0	0	0	0	0	0	0	0	0	0	0	0	0	0	0	0	0	0	0	0	0	0	0	0	0	0	0	0	0	0	0	0	0	0	0	0	0	0	0	0	0	0	0
0	0	0	0	0	0	0	0	0	0	0	0	0	0	0	0	0	0	0	0	0	0	0	0	0	0	0	0	0	0	0	0	0	0	0	0	0	0	0	0	0	0	0	0	0	0	0	0	0	0
0	0	0	0	0	0	0	0	0	0	0	0	0	0	0	0	0	0	0	0	0	0	0	0	0	0	0	0	0	0	0	0	0	0	0	0	0	0	0	0	0	0	0	0	0	0	0	0	0	0
0	0	0	0	0	0	0	0	0	0	0	0	0	0	0	0	0	0	0	0	0	0	0	0	0	0	0	0	0	0	0	0	0	0	0	0	0	0	0	0	0	0	0	0	0	0	0	0	0	0
0	0	0	0	0	0	0	0	0	0	0	0	0	0	0	0	0	0	0	0	0	0	0	0	0	0	0	0	0	0	0	0	0	0	0	0	0	0	0	0	0	0	0	0	0	0	0	0	0	0
0	0	0	0	0	0	0	0	0	0	0	0	0	0	0	0	0	0	0	0	0	0	0	0	0	0	0	0	0	0	0	0	0	0	0	0	0	0	0	0	0	0	0	0	0	0	0	0	0	0
0	0	0	0	0	0	0	0	0	0	0	0	0	0	0	0	0	0	0	0	0	0	0	0	0	0	0	0	0	0	0	0	0	0	0	0	0	0	0	0	0	0	0	0	0	0	0	0	0	0
0	0	0	0	0	0	0	0	0	0	0	0	0	0	0	0	0	0	0	0	0	0	0	0	0	0	0	0	0	0	0	0	0	0	0	0	0	0	0	0	0	0	0	0	0	0	0	0	0	0
0	0	0	0	0	0	0	0	0	0	0	0	0	0	0	0	0	0	0	0	0	0	0	0	0	0	0	0	0	0	0	0	0	0	0	0	0	0	0	0	0	0	0	0	0	0	0	0	0	0
0	0	0	0	0	0	0	0	0	0	0	0	0	0	0	0	0	0	0	0	0	0	0	0	0	0	0	0	0	0	0	0	0	0	0	0	0	0	0	0	0	0	0	0	0	0	0	0	0	0
0	0	0	0	0	0	0	0	0	0	0	0	0	0	0	0	0	0	0	0	0	0	0	0	0	0	0	0	0	0	0	0	0	0	0	0	0	0	0	0	0	0	0	0	0	0	0	0	0	0
0	0	0	0	0	0	0	0	0	0	0	0	0	0	0	0	0	0	0	0	0	0	0	0	0	0	0	0	0	0	0	0	0	0	0	0	0	0	0	0	0	0	0	0	0	0	0	0	0	0
0	0	0	0	0	0	0	0	0	0	0	0	0	0	0	0	0	0	0	0	0	0	0	0	0	0	0	0	0	0	0	0	0	0	0	0	0	0	0	0	0	0	0	0	0	0	0	0	0	0
0	0	0	0	0	0	0	0	0	0	0	0	0	0	0	0	0	0	0	0	0	0	0	0	0	0	0	0	0	0	0	0	0	0	0	0	0	0	0	0	0	0	0	0	0	0	0	0	0	0
0	0	0	0	0	0	0	0	0	0	0	0	0	0	0	0	0	0	0	0	0	0	0	0	0	0	0	0	0	0	0	0	0	0	0	0	0	0	0	0	0	0	0	0	0	0	0	0	0	0
0	0	0	0	0	0	0	0	0	0	0	0	0	0	0	0	0	0	0	0	0	0	0	0	0	0	0	0	0	0	0	0	0	0	0	0	0	0	0	0	0	0	0	0	0	0	0	0	0	0
0	0	0	0	0	0	0	0	0	0	0	0	0	0	0	0	0	0	0	0	0	0	0	0	0	0	0	0	0	0	0	0	0	0	0	0	0	0	0	0	0	0	0	0	0	0	0	0	0	0
0	0	0	0	0	0	0	0	0	0	0	0	0	0	0	0	0	0	0	0	0	0	0	0	0	0	0	0	0	0	0	0	0	0	0	0	0	0	0	0	0	0	0	0	0	0	0	0	0	0
0	0	0	0	0	0	0	0	0	0	0	0	0	0	0	0	0	0	0	0	0	0	0	0	0	0	0	0	0	0	0	0	0	0	0	0	0	0	0	0	0	0	0	0	0	0	0	0	0	0
0	0	0	0	0	0	0	0	0	0	0	0	0	0	0	0	0	0	0	0	0	0	0	0	0	0	0	0	0	0	0	0	0	0	0	0	0	0	0	0	0	0	0	0	0	0	0	0	0	0
0	0	0	0	0	0	0	0	0	0	0	0	0	0	0	0	0	0	0	0	0	0	0	0	0	0	0	0	0	0	0	0	0	0	0	0	0	0	0	0	0	0	0	0	0	0	0	0	0	0
0	0	0	0	0	0	0	0	0	0	0	0	0	0	0	0	0	0	0	0	0	0	0	0	0	0	0	0	0	0	0	0	0	0	0	0	0	0	0	0	0	0	0	0	0	0	0	0	0	0
0	0	0	0	0	0	0	0	0	0	0	0	0	0	0	0	0	0	0	0	0	0	0	0	0	0	0	0	0	0	0	0	0	0	0	0	0	0	0	0	0	0	0	0	0	0	0	0	0	0
0	0	0	0	0	0	0	0	0	0	0	0	0	0	0	0	0	0	0	0	0	0	0	0	0	0	0	0	0	0	0	0	0	0	0	0	0	0	0	0	0	0	0	0	0	0	0	0	0	0
0	0	0	0	0	0	0	0	0	0	0	0	0	0	0	0	0	0	0	0	0	0	0	0	0	0	0	0	0	0	0	0	0	-0.0269033	-0.025801	-0.00748943	-0.0040644	0.00324795	0.0137031	0.026476	0.0329806	0.0356098	0.0335136	0	0	0	0	0	0	0
0	0	0	0	0	0	0	0	0	0	0	0	0	0	0	0	0	0	0	0	0	0	0	0	0	0	0	0	0	0	-0.00984182	-0.0156313	-0.00967832	-0.0323332	-0.036142	-0.0228296	-0.0165627	-0.0224069	-0.00334771	-0.00161786	0.00997622	0.0317454	0.0151198	0.0147656	0.0344721	0.0359109	0	0	0	0
0	0	0	0	0	0	0	0	0	0	0	0	0	0	0	0	0	0	0	0	0	0	0	0	0	0	0	0	-0.0181501	-0.00555808	-0.0142215	-0.0184623	-0.00996992	-0.0339103	-0.0271635	-0.0204627	-0.0116542	-0.00555605	0.00171662	0.00238862	0.00299021	0.00610806	0.0112408	0.0109195	0.0178446	0.0301498	0.0349681	0.0306465	0	0
0	0	0	0	0	0	0	0	0	0	0	0	0	0	0	0	0	0	0	0	0	0	0	0	0	0	0	0	-0.0134767	-0.000683644	-0.0239095	-0.0321851	-0.0183852	-0.0291565	-0.0230844	-0.0227667	-0.0188859	-0.00456108	-0.00297364	-0.00409394	-0.0102724	-0.0151938	0.00584358	0.00336069	0.00908887	0.0410394	0.0371009	0.0277256	0	0
0	0	0	0	0	0	0	0	0	0	0	0	0	0	0	0	0	0	0	0	0	0	0	0	0	0	0	-0.0115538	-0.00851268	0.000171762	-0.0174604	-0.0506058	-0.00973212	-0.0095037	-0.0221963	-0.0137782	-0.0177923	-0.0194458	-0.0236401	-0.0102132	0.000931696	0.00468506	0.00743135	-0.00617687	-0.0189225	0.0320738	0.0433911	0.0318524	0.0361751	0
0	0	0	0	0	0	0	0	0	0	0	0	0	0	0	0	0	0	0	0	0	0	0	0	0	0	-0.00733576	-0.0101452	-0.00598581	-0.00443551	-0.0253868	-0.0269141	0.00346531	-0.00980229	-0.0118216	-0.0250743	-0.0387592	-0.0421711	-0.00568369	0.00188514	0.00711872	0.0022779	-0.00709862	-0.0102749	-0.0253242	0.0149383	0.0327986	0.025781	0.0249022	0
0	0	0	0	0	0	0	0	0	0	0	0	0	0	0	0	0	0	0	0	0	0	0	0	0	-0.00637137	0.000169588	-0.0162846	-0.00552821	0.00396896	0.00176477	0.0039531	0.00258953	-0.0191042	-0.0230553	-0.00772416	0.000375772	0.00369414	0.00599993	-0.00316224	-0.0149155	0.00700759	-0.0173098	-0.0318923	-0.037099	-0.0362385	-0.0206406	-0.0155379	0.00142829	0.00524315
0	0	0	0	0	0	0	0	0	0	0	0	0	0	0	0	0	0	0	0	0	0	0	0	-0.0152893	-0.00589688	-0.00666424	-0.0102127	0.0031586	0.0131538	-0.00971466	-0.051922	-0.0506644	-0.0402867	-0.0199387	-0.034189	-0.0346883	0.0230219	0.00543858	-0.00921425	-0.0124108	-0.00123562	-0.012271	-0.0196803	-0.0171258	-0.0422441	-0.0192028	-0.00654454	0.00332608	-0.000873735
0	0	0	0	0	0	0	0	0	0	0	0	0	0	0	0	0	0	0	0	0	0	0	-0.0240041	-0.0110638	-0.018281	-0.00657445	0.00412138	-0.0141769	-0.019639	-0.0198379	-0.0210576	-0.0128901	-0.000810291	-0.00795525	-0.0130744	0.0154925	-0.00315426	-0.0105762	-0.00698781	-0.009017	0.00781584	-0.000784375	-0.00390342	-0.0478195	-0.0277698	-0.00496536	-0.0105148	-0.00384038	-0.013237
0	0	0	0	0	0	0	0	0	0	0	0	0	0	0	0	0	0	0	0	0	0	0	-0.0185723	-0.0116816	-0.0132563	-0.00450549	-0.023476	-0.0225619	-0.0159602	-0.028472	-0.0285567	0.00691957	0.00164694	-0.0190813	-0.00571865	0.0154813	-0.0121414	-0.00185557	0.00270744	0.00261601	0.0119337	-0.00408167	-0.00572547	-0.0297985	-0.0132214	-0.0104894	-0.0138497	-0.0100492	-0.00952051
0	0	0	0	0	0	0	0	0	0	0	0	0	0	0	0	0	0	0	0	0	0	0	-0.0187978	-0.00718165	-0.0248128	-0.023674	-0.0279752	-0.014624	-0.0169221	-0.0104535	-0.0186009	-0.0174461	-0.0145983	0.00462171	0.00988235	-0.0240254	-0.0171791	0.0127616	0.0115897	0.00753014	0.00529641	-0.00238896	-0.00880196	-0.0189829	-0.00999765	-0.00457802	-0.00803707	-0.00793356	-0.011291
0	0	0	0	0	0	0	0	0	0	0	0	0	0	0	0	0	0	0	0	0	0	0	-0.0184251	-0.0392056	-0.0592354	0.0041284	-0.00857978	0.00324614	0.0112119	-0.0116927	-0.0112976	-0.0257382	0.00345009	0.020712	0.00549995	-0.0110222	0.00476128	0.00646087	0.00918046	-0.0008148	0.0139099	-0.000742927	-0.00387772	-0.0290911	-0.00446071	-0.00106252	-0.0108907	-0.00764083	-0.00850782
0	0	0	0	0	0	0	0	0	0	0	0	0	0	0	0	0	0	0	0	0	0	0	-0.0103568	-0.0549425	-0.0377286	0.0168506	0.00730168	-0.0065412	0.0178186	0.00400743	-0.0102394	0.0133657	-0.0047799	0.0158355	0.00961663	0.00446528	0.00598645	0.0135165	0.00383605	0.00139491	0.0095439	0.00651439	-0.00678671	0.00319199	0.000591382	0.00207933	-0.00380919	0.00340144	0
0	0	0	0	0	0	0	0	0	0	0	0	0	0	0	0	0	0	0	0	0	0	0	-0.0187863	-0.0778826	-0.0353021	-0.00237817	0.008155	0.0232376	0.00972663	-0.0277657	0.00927695	0.0326794	-0.00757143	-0.00308827	0.0188223	0.0170876	0.014024	0.0178754	0.0135407	-0.00589799	0.0116025	0.00425976	-0.00555481	0.000912603	0.0053533	0.00176026	-0.0061621	-0.00423487	0
0	0	0	0	0	0	0	0	0	0	0	0	0	0	0	0	0	0	0	0	0	0	0	-0.0105505	-0.080602	-0.0272013	0.036663	0.0135275	0.0219089	0.015286	-0.0267549	0.0135313	0.0192192	0.0267139	0.03003	0.0297546	0.0213451	0.016399	0.0215071	0.0268489	0.0166915	0.00765516	-0.00907487	-0.00280881	0.00408625	0.00442109	0.00096395	-0.00497635	0	0
0	0	0	0	0	0	0	0	0	0	0	0	0	0	0	0	0	0	0	0	0	0	0	0	-0.0541412	-0.0423134	0.0151751	0.0139322	0.00502748	0.021551	0.00873691	0.0147858	0.0213767	0.026477	0.0234462	0.0211176	0.0101973	0.0119831	0.0142058	0.0109387	0.00678407	-0.00506432	-0.00436873	-0.00153655	-4.77504e-05	0.00157685	-0.00401146	-0.00664279	0	0
0	0	0	0	0	0	0	0	0	0	0	0	0	0	0	0	0	0	0	0	0	0	0	0	0	-0.0398913	-0.0129056	0.0176506	0.0208967	0.0154836	-0.00276458	0.0149092	0.0459435	0.0172136	0.0277602	0.0345885	0.0138345	0.00611964	0.0102529	0.0120166	0.00595285	-0.00608187	-0.0100492	-0.00308274	-0.0037909	-0.00200002	-0.00374494	0	0	0
0	0	0	0	0	0	0	0	0	0	0	0	0	0	0	0	0	0	0	0	0	0	0	0	0	0	0	-0.021605	0.00809448	0.0230676	0.00906121	-0.0204917	0.00718844	0.0403101	0.054802	0.0228093	0.0128876	0.012606	0.00560756	-0.00110627	-0.0118688	-0.0217818	-0.0081145	-0.00243614	-0.00275032	0	0	0	0	0
0	0	0	0	0	0	0	0	0	0	0	0	0	0	0	0	0	0	0	0	0	0	0	0	0	0	0	0	-0.0255926	-0.00379301	0.00223093	-0.0184862	-0.012361	-0.0118377	0.0022223	0.0209599	0.0129408	0.00731039	0.00191082	-3.10806e-05	-0.0210417	-0.0160483	-0.00123834	-0.000415693	0	0	0	0	0	0
0	0	0	0	0	0	0	0	0	0	0	0	0	0	0	0	0	0	0	0	0	0	0	0	0	0	0	0	0	-0.039896	-0.0247605	0.0177439	0.0075715	-0.015995	-0.0100353	0.00287762	0.0090496	-0.00225291	-0.0101944	-0.0396819	-0.0136776	-0.000190989	-0.00149534	0	0	0	0	0	0	0
0	0	0	0	0	0	0	0	0	0	0	0	0	0	0	0	0	0	0	0	0	0	0	0	0	0	0	0	0	0	-0.0833023	-0.00692105	0.0343793	-0.00629669	-0.0111455	-0.0144476	-0.01027	-0.00640824	-0.0129662	-0.0204729	-0.00523259	-0.00772976	0	0	0	0	0	0	0	0
0	0	0	0	0	0	0	0	0	0	0	0	0	0	0	0	0	0	0	0	0	0	0	0	0	0	0	0	0	0	0	0	0	0	0	0	0	0	0	0	0	0	0	0	0	0	0	0	0	0
0	0	0	0	0	0	0	0	0	0	0	0	0	0	0	0	0	0	0	0	0	0	0	0	0	0	0	0	0	0	0	0	0	0	0	0	0	0	0	0	0	0	0	0	0	0	0	0	0	0
0	0	0	0	0	0	0	0	0	0	0	0	0	0	0	0	0	0	0	0	0	0	0	0	0	0	0	0	0	0	0	0	0	0	0	0	0	0	0	0	0	0	0	0	0	0	0	0	0	0
0	0	0	0	0	0	0	0	0	0	0	0	0	0	0	0	0	0	0	0	0	0	0	0	0	0	0	0	0	0	0	0	0	0	0	0	0	0	0	0	0	0	0	0	0	0	0	0	0	0
0	0	0	0	0	0	0	0	0	0	0	0	0	0	0	0	0	0	0	0	0	0	0	0	0	0	0	0	0	0	0	0	0	0	0	0	0	0	0	0	0	0	0	0	0	0	0	0	0	0
0	0	0	0	0	0	0	0	0	0	0	0	0	0	0	0	0	0	0	0	0	0	0	0	0	0	0	0	0	0	0	0	0	0	0	0	0	0	0	0	0	0	0	0	0	0	0	0	0	0
0	0	0	0	0	0	0	0	0	0	0	0	0	0	0	0	0	0	0	0	0	0	0	0	0	0	0	0	0	0	0	0	0	0	0	0	0	0	0	0	0	0	0	0	0	0	0	0	0	0
0	0	0	0	0	0	0	0	0	0	0	0	0	0	0	0	0	0	0	0	0	0	0	0	0	0	0	0	0	0	0	0	0	0	0	0	0	0	0	0	0	0	0	0	0	0	0	0	0	0
0	0	0	0	0	0	0	0	0	0	0	0	0	0	0	0	0	0	0	0	0	0	0	0	0	0	0	0	0	0	0	0	0	0	0	0	0	0	0	0	0	0	0	0	0	0	0	0	0	0
0	0	0	0	0	0	0	0	0	0	0	0	0	0	0	0	0	0	0	0	0	0	0	0	0	0	0	0	0	0	0	0	0	0	0	0	0	0	0	0	0	0	0	0	0	0	0	0	0	0
0	0	0	0	0	0	0	0	0	0	0	0	0	0	0	0	0	0	0	0	0	0	0	0	0	0	0	0	0	0	0	0	0	0	0	0	0	0	0	0	0	0	0	0	0	0	0	0	0	0
0	0	0	0	0	0	0	0	0	0	0	0	0	0	0	0	0	0	0	0	0	0	0	0	0	0	0	0	0	0	0	0	0	0	0	0	0	0	0	0	0	0	0	0	0	0	0	0	0	0
0	0	0	0	0	0	0	0	0	0	0	0	0	0	0	0	0	0	0	0	0	0	0	0	0	0	0	0	0	0	0	0	0	0	0	0	0	0	0	0	0	0	0	0	0	0	0	0	0	0
0	0	0	0	0	0	0	0	0	0	0	0	0	0	0	0	0	0	0	0	0	0	0	0	0	0	0	0	0	0	0	0	0	0	0	0	0	0	0	0	0	0	0	0	0	0	0	0	0	0
0	0	0	0	0	0	0	0	0	0	0	0	0	0	0	0	0	0	0	0	0	0	0	0	0	0	0	0	0	0	0	0	0	0	0	0	0	0	0	0	0	0	0	0	0	0	0	0	0	0
0	0	0	0	0	0	0	0	0	0	0	0	0	0	0	0	0	0	0	0	0	0	0	0	0	0	0	0	0	0	0	0	0	0	0	0	0	0	0	0	0	0	0	0	0	0	0	0	0	0
0	0	0	0	0	0	0	0	0	0	0	0	0	0	0	0	0	0	0	0	0	0	0	0	0	0	0	0	0	0	0	0	0	0	0	0	0	0	0	0	0	0	0	0	0	0	0	0	0	0
0	0	0	0	0	0	0	0	0	0	0	0	0	0	0	0	0	0	0	0	0	0	0	0	0	0	0	0	0	0	0	0	0	0	0	0	0	0	0	0	0	0	0	0	0	0	0	0	0	0
0	0	0	0	0	0	0	0	0	0	0	0	0	0	0	0	0	0	0	0	0	0	0	0	0	0	0	0	0	0	0	0	0	0	0	0	0	0	0	0	0	0	0	0	0	0	0	0	0	0
0	0	0	0	0	0	0	0	0	0	0	0	0	0	0	0	0	0	0	0	0	0	0	0	0	0	0	0	0	0	0	0	0	0	0	0	0	0	0	0	0	0	0	0	0	0	0	0	0	0
0	0	0	0	0	0	0	0	0	0	0	0	0	0	0	0	0	0	0	0	0	0	0	0	0	0	0	0	0	0	0	0	0	0	0	0	0	0	0	0	0	0	0	0	0	0	0	0	0	0
0	0	0	0	0	0	0	0	0	0	0	0	0	0	0	0	0	0	0	0	0	0	0	0	0	0	0	0	0	0	0	0	0	0	0	0	0	0	0	0	0	0	0	0	0	0	0	0	0	0
0	0	0	0	0	0	0	0	0	0	0	0	0	0	0	0	0	0	0	0	0	0	0	0	0	0	0	0	0	0	0	0	0	0	0	0	0	0	0	0	0	0	0	0	0	0	0	0	0	0
0	0	0	0	0	0	0	0	0	0	0	0	0	0	0	0	0	0	0	0	0	0	0	0	0	0	0	0	0	0	0	0	0	0	0	0	0	0	0	0	0	0	0	0	0	0	0	0	0	0
0	0	0	0	0	0	0	0	0	0	0	0	0	0	0	0	0	0	0	0	0	0	0	0	0	0	0	0	0	0	0	0	0	0	0	0	0	0	0	0	0	0	0	0	0	0	0	0	0	0
0	0	0	0	0	0	0	0	0	0	0	0	0	0	0	0	0	0	0	0	0	0	0	0	0	0	0	0	0	0	0	0	0	0	0	0	0	0	0	0	0	0	0	0	0	0	0	0	0	0
0	0	0	0	0	0	0	0	0	0	0	0	0	0	0	0	0	0	0	0	0	0	0	0	0	0	0	0	0	0	0	0	0	0	0	0	0	0	0	0	0	0	0	0	0	0	0	0	0	0
0	0	0	0	0	0	0	0	0	0	0	0	0	0	0	0	0	0	0	0	0	0	0	0	0	0	0	0	0	0	0	0	0	0	0	0	0	0	0	0	0	0	0	0	0	0	0	0	0	0
0	0	0	0	0	0	0	0	0	0	0	0	0	0	0	0	0	0	0	0	0	0	0	0	0	0	0	0	0	0	0	0	0	0	0	0	0	0	0	0	0	0	0	0	0	0	0	0	0	0
0	0	0	0	0	0	0	0	0	0	0	0	0	0	0	0	0	0	0	0	0	0	0	0	0	0	0	0	0	0	0	0	0	0	0	0	0	0	0	0	0	0	0	0	0	0	0	0	0	0
0	0	0	0	0	0	0	0	0	0	0	0	0	0	0	0	0	0	0	0	0	0	0	0	0	0	0	0	-0.0258316	-0.019485	-0.0137072	0	0	0	0	0	0	0	0	0	0	0	0	0	0	0	0	0	0	0
0	0	0	0	0	0	0	0	0	0	0	0	0	0	0	0	0	0	0	0	0	0	0	0	-0.00343672	-0.00179091	0.00396001	-0.0139748	-0.00987212	0.0249525	0.0174192	0.0296313	0.0335108	0	0	0.00439312	0.015692	-0.0149511	0	0	0	0	0	0	0	0	0	0	0	0
0	0	0	0	0	0	0	0	0	0	0	0	0	0	0	0	0	0	0	0	-0.0102084	-0.00775854	-0.00449546	0.00469471	0.00282619	-0.000882642	0.0101369	-0.00644273	-0.00187233	0.0276133	0.0343798	0.0271358	0.0437516	0.0509143	0.040077	0.0401658	0.0751787	0.006825	0.0345898	0	0	0	0	0	0	0	0	0	0	0
0	0	0	0	0	0	0	0	0	0	0	0	0	0	0	0	0	0	-0.0246099	-0.00798806	-0.002273	-0.00749651	-0.000735496	-0.00296577	-0.000245669	0.000859293	0.0166355	0.00116927	0.0132664	0.0390061	0.0284794	0.036108	0.0513215	0.0569182	0.0324079	0.0487178	0.0409142	0.0182322	-0.0146882	0	0	0	0	0	0	0	0	0	0	0
0	0	0	0	0	0	0	0	0	0	0	0	0	0	0	0	-0.0495752	-0.0300003	-0.0303472	-0.0105927	-0.00406838	-0.00604505	-0.00878972	-0.0241869	-0.0298756	-0.0315621	-0.0237086	-0.0253331	-0.00854451	0.00149304	-0.0142524	0.0364841	0.153419	0.0485264	-0.0190026	0.0845405	-0.0220525	-0.0247445	0.0991158	0	0	0	0	0	0	0	0	0	0	0
0	0	0	0	0	0	0	0	0	0	0	0	0	0	0	-0.0129895	-0.0193716	-0.0115815	-0.0201584	-0.0130666	-0.00745352	0.00247544	-0.00174404	-0.00676724	-0.00350768	-0.00990943	0.00760264	-0.000760603	0.00764665	0.0304553	0.0248572	0.0605924	0.0689057	0.0172205	-0.00121121	0.0447925	0.0176243	0.0204305	0	0	0	0	0	0	0	0	0	0	0	0
0	0	0	0	0	0	0	0	0	0	0	0	0	0	-0.00511105	-0.00362909	-0.0144079	-0.0184945	-0.0111332	-0.0264125	-0.0219599	-0.0222683	-0.00993115	0.0194741	0.0274657	0.00382394	0.0138261	0.00281006	0.0379521	0.0658681	0.0416133	0.0475927	0.0116413	-0.0415319	0.059838	0.0411412	0.0328994	0.00544398	0.0636507	0	0	0	0	0	0	0	0	0	0	0
0	0	0	0	0	0	0	0	0	0	0	0	0	-0.0160682	-0.00383812	-0.00505211	-0.0129709	-0.011699	-0.00806414	-0.0155737	-0.0795156	-0.0489059	0.0206591	0.0247812	0.0154705	0.016525	0.0343369	0.0117442	0.0311245	0.0572792	0.0463339	0.0414445	-0.0424563	0.0301576	0.0246139	0.00280336	0.0526881	0.0130009	0.0565935	0	0	0	0	0	0	0	0	0	0	0
0	0	0	0	0	0	0	0	0	0	0	0	0	-0.0152259	-0.00891478	-0.0138588	-0.014081	-0.00818359	-0.00193476	-0.0108069	-0.0372758	-0.0241373	0.00766849	0.00320343	0.00758132	0.0176752	0.0343807	0.0176465	0.0284657	0.0300072	0.0336727	0.0235291	0.029589	0.030575	-0.021058	0.028661	0.0648561	0.0258653	0.0628825	0	0	0	0	0	0	0	0	0	0	0
0	0	0	0	0	0	0	0	0	0	0	0	0	-0.022998	-0.00855314	-0.0119196	-0.0176494	-0.0099156	-0.00918253	-0.017129	-0.00979645	0.00204504	-0.00948045	-0.00734243	0.0049696	0.0144775	0.0282449	0.0157138	0.0100001	0.0140171	0.0313221	0.0593919	0.0447605	-0.0386484	0.014391	0.0459774	0.0349619	0.0144597	0	0	0	0	0	0	0	0	0	0	0	0
0	0	0	0	0	0	0	0	0	0	0	0	0	-0.026971	-0.0154838	-0.020723	-0.016517	-0.0116421	-0.0128385	-0.00883003	-0.000203702	-0.0043404	-0.0137363	-0.00124285	0.00132566	0.0143629	0.0134883	-0.00954529	0.0076485	0.00065071	0.0506887	0.0647646	-0.0127699	-0.00488763	0.0411076	0.0350924	0.0222652	0.0236861	0	0	0	0	0	0	0	0	0	0	0	0
0	0	0	0	0	0	0	0	0	0	0	0	0	-0.0331052	-0.0205661	-0.01721	-0.0216317	-0.0139315	-0.0122906	-0.000633572	-0.000773812	-0.0134787	-0.0132587	-0.0108115	-0.0142188	-0.0104557	-0.019197	0.0180701	0.0239936	0.032932	0.0491537	-0.00406957	-0.000883892	0.0227036	0.0286998	0.0331513	0.0134825	0.0257027	0	0	0	0	0	0	0	0	0	0	0	0
0	0	0	0	0	0	0	0	0	0	0	0	0	-0.0173767	-0.00438191	-0.0045704	0.0113142	0.0401739	0.10736	0.104317	0.0370857	-0.0820116	-0.222486	-0.285347	-0.179913	-0.0527217	0.0298608	0.0701145	0.103862	0.126567	0.0716546	0.000450659	0.00617664	0.000488791	-0.0253358	-0.230555	0	0	0	0	0	0	0	0	0	0	0	0	0	0
0	0	0	0	0	0	0	0	0	0	0	0	0	0	-0.0251139	-0.0192288	-0.0274627	-0.0245696	-0.0394472	-0.0302516	-0.0170096	-0.0160776	-0.0209952	-0.0179738	-0.023308	-0.0202262	-0.0150362	-0.0115423	-0.00781093	0.00582236	0.00229222	-0.00383056	0.0153906	-0.0199903	0.00399684	0	0	0	0	0	0	0	0	0	0	0	0	0	0	0
0	0	0	0	0	0	0	0	0	0	0	0	0	0	-0.0462351	-0.0301679	-0.0246842	-0.021392	-0.0201731	-0.0213728	-0.0264006	-0.0287043	-0.0187535	-0.0284332	-0.0293089	-0.0184708	-0.0115797	-0.0157627	-0.0107914	-0.00930837	-0.00898953	-0.0121171	-0.00773533	0	0	0	0	0	0	0	0	0	0	0	0	0	0	0	0	0
0	0	0	0	0	0	0	0	0	0	0	0	0	0	0	-0.0282019	-0.0268107	-0.0236826	-0.0215582	-0.0191172	-0.0217025	-0.0207727	-0.0183668	-0.0236706	-0.0293069	-0.0225886	-0.0102703	-0.0129394	-0.0146714	-0.000788645	0	0	0	0	0	0	0	0	0	0	0	0	0	0	0	0	0	0	0	0
0	0	0	0	0	0	0	0	0	0	0	0	0	0	0	0	-0.0245596	-0.013542	-0.0161647	-0.0234905	-0.0206396	-0.0179155	-0.0249294	-0.0236007	-0.0230845	-0.0227591	-0.0101337	-0.0189079	0	0	0	0	0	0	0	0	0	0	0	0	0	0	0	0	0	0	0	0	0	0
0	0	0	0	0	0	0	0	0	0	0	0	0	0	0	0	0	-0.0272364	-0.0188455	-0.0233197	-0.0188181	-0.0115544	-0.0163696	-0.0311196	-0.00957973	-0.0173379	-0.0169364	0	0	0	0	0	0	0	0	0	0	0	0	0	0	0	0	0	0	0	0	0	0	0
0	0	0	0	0	0	0	0	0	0	0	0	0	0	0	0	0	0	-0.0283561	-0.0305278	-0.0170542	-0.0185365	-0.0215128	-0.0235438	-0.0161517	0	0	0	0	0	0	0	0	0	0	0	0	0	0	0	0	0	0	0	0	0	0	0	0	0
0	0	0	0	0	0	0	0	0	0	0	0	0	0	0	0	0	0	0	0	0	0	0	0	0	0	0	0	0	0	0	0	0	0	0	0	0	0	0	0	0	0	0	0	0	0	0	0	0	0
0	0	0	0	0	0	0	0	0	0	0	0	0	0	0	0	0	0	0	0	0	0	0	0	0	0	0	0	0	0	0	0	0	0	0	0	0	0	0	0	0	0	0	0	0	0	0	0	0	0
0	0	0	0	0	0	0	0	0	0	0	0	0	0	0	0	0	0	0	0	0	0	0	0	0	0	0	0	0	0	0	0	0	0	0	0	0	0	0	0	0	0	0	0	0	0	0	0	0	0
0	0	0	0	0	0	0	0	0	0	0	0	0	0	0	0	0	0	0	0	0	0	0	0	0	0	0	0	0	0	0	0	0	0	0	0	0	0	0	0	0	0	0	0	0	0	0	0	0	0
0	0	0	0	0	0	0	0	0	0	0	0	0	0	0	0	0	0	0	0	0	0	0	0	0	0	0	0	0	0	0	0	0	0	0	0	0	0	0	0	0	0	0	0	0	0	0	0	0	0
0	0	0	0	0	0	0	0	0	0	0	0	0	0	0	0	0	0	0	0	0	0	0	0	0	0	0	0	0	0	0	0	0	0	0	0	0	0	0	0	0	0	0	0	0	0	0	0	0	0
0	0	0	0	0	0	0	0	0	0	0	0	0	0	0	0	0	0	0	0	0	0	0	0	0	0	0	0	0	0	0	0	0	0	0	0	0	0	0	0	0	0	0	0	0	0	0	0	0	0
0	0	0	0	0	0	0	0	0	0	0	0	0	0	0	0	0	0	0	0	0	0	0	0	0	0	0	0	0	0	0	0	0	0	0	0	0	0	0	0	0	0	0	0	0	0	0	0	0	0
0	0	0	0	0	0	0	0	0	0	0	0	0	0	0	0	0	0	0	0	0	0	0	0	0	0	0	0	0	0	0	0	0	0	0	0	0	0	0	0	0	0	0	0	0	0	0	0	0	0
0	0	0	0	0	0	0	0	0	0	0	0	0	0	0	0	0	0	0	0	0	0	0	0	0	0	0	0	0	0	0	0	0	0	0	0	0	0	0	0	0	0	0	0	0	0	0	0	0	0
0	0	0	0	0	0	0	0	0	0	0	0	0	0	0	0	0	0	0	0	0	0	0	0	0	0	0	0	0	0	0	0	0	0	0	0	0	0	0	0	0	0	0	0	0	0	0	0	0	0
0	0	0	0	0	0	0	0	0	0	0	0	0	0	0	0	0	0	0	0	0	0	0	0	0	0	0	0	0	0	0	0	0	0	0	0	0	0	0	0	0	0	0	0	0	0	0	0	0	0
0	0	0	0	0	0	0	0	0	0	0	0	0	0	0	0	0	0	0	0	0	0	0	0	0	0	0	0	0	0	0	0	0	0	0	0	0	0	0	0	0	0	0	0	0	0	0	0	0	0
0	0	0	0	0	0	0	0	0	0	0	0	0	0	0	0	0	0	0	0	0	0	0	0	0	0	0	0	0	0	0	0	0	0	0	0	0	0	0	0	0	0	0	0	0	0	0	0	0	0
0	0	0	0	0	0	0	0	0	0	0	0	0	0	0	0	0	0	0	0	0	0	0	0	0	0	0	0	0	0	0	0	0	0	0	0	0	0	0	0	0	0	0	0	0	0	0	0	0	0
0	0	0	0	0	0	0	0	0	0	0	0	0	0	0	0	0	0	0	0	0	0	0	0	0	0	0	0	0	0	0	0	0	0	0	0	0	0	0	0	0	0	0	0	0	0	0	0	0	0
0	0	0	0	0	0	0	0	0	0	0	0	0	0	0	0	0	0	0	0	0	0	0	0	0	0	0	0	0	0	0	0	0	0	0	0	0	0	0	0	0	0	0	0	0	0	0	0	0	0
0	0	0	0	0	0	0	0	0	0	0	0	0	0	0	0	0	0	0	0	0	0	0	0	0	0	0	0	0	0	0	0	0	0	0	0	0	0	0	0	0	0	0	0	0	0	0	0	0	0
0	0	0	0	0	0	0	0	0	0	0	0	0	0	0	0	0	0	0	0	0	0	0	0	0	0	0	0	0	0	0	0	0	0	0	0	0	0	0	0	0	0	0	0	0	0	0	0	0	0
0	0	0	0	0	0	0	0	0	0	0	0	0	0	0	0	0	0	0	0	0	0	0	0	0	0	0	0	0	0	0	0	0	0	0	0	0	0	0	0	0	0	0	0	0	0	0	0	0	0
0	0	0	0	0	0	0	0	0	0	0	0	0	0	0	0	0	0	0	0	0	0	0	0	0	0	0	0	0	0	0	0	0	0	0	0	0	0	0	0	0	0	0	0	0	0	0	0	0	0
0	0	0	0	0	0	0	0	0	0	0	0	0	0	0	0	0	0	0	0	0	0	0	0	0	0	0	0	0	0	0	0	0	0	0	0	0	0	0	0	0	0	0	0	0	0	0	0	0	0
0	0	0	0	0	0	0	0	0	0	0	0	0	0	0	0	0	0	0	0	0	0	0	0	0	0	0	0	0	0	0	0	0	0	0	0	0	0	0	0	0	0	0	0	0	0	0	0	0	0
0	0	0	0	0	0	0	0	0	0	0	0	0	0	0	0	0	0	0	0	0	0	0	0	0	0	0	0	0	0	0	0	0	0	0	0	0	0	0	0	0	0	0	0	0	0	0	0	0	0
0	0	0	0	0	0	0	0	0	0	0	0	0	0	0	0	0	0	0	0	0	0	0	0	0	0	0	0	0	0	0	0	0	0	0	0	0	0	0	0	0	0	0	0	0	0	0	0	0	0
0	0	0	0	0	0	0	0	0	0	0	0	0	0	0	0	0	0	0	0	0	0	0	0	0	0	0	0	0	0	0	0	0	0	0	0	0	0	0	0	0	0	0	0	0	0	0	0	0	0
0	0	0	0	0	0	0	0	0	0	0	0	0	0	0	0	0	0	0	0	0	0	0	0	0	0	0	0	0	0	0	0	0	0	0	0	0	0	0	0	0	0	0	0	0	0	0	0	0	0
0	0	0	0	0	0	0	0	0	0	0	0	0	0	0	0	0	0	0	0	0	0	0	0	0	0	0	0	0	0	0	0	0	0	0	0	0	0	0	0	0	0	0	0	0	0	0	0	0	0
0	0	0	0	0	0	0	0	0	0	0	0	0	0	0	0	0	0	0	0	0	0	0	0	0	0	0	0	0	0	0	0	-0.0228992	-0.0288201	-0.0197604	-0.0196192	-0.0214067	-0.0168798	-0.023881	-0.0109747	0	0	0	0	0	0	0	0	0	0
0	0	0	0	0	0	0	0	0	0	0	0	0	0	0	0	0	0	0	0	0	0	0	0	0	0	0	0	0	0	-0.0404231	-0.0372554	-0.0315649	-0.0338263	-0.0192937	-0.0283211	-0.0321577	-0.024087	-0.0182355	-0.0192997	-0.0123965	0	0	0	0	0	0	0	0	0
0	0	0	0	0	0	0	0	0	0	0	0	0	0	0	0	0	0	0	0	0	0	0	0	0	0	0	0	0	-0.0391741	-0.0344163	-0.0311939	-0.0205475	-0.0323333	-0.0182299	-0.026503	-0.0327872	-0.0253518	-0.0190901	-0.0256905	-0.016308	-0.0101634	-0.00603581	0	0	0	0	0	0	0
0	0	0	0	0	0	0	0	0	0	0	0	0	0	0	0	0	0	0	0	0	0	0	0	0	0	0	0	-0.0442423	-0.0251959	-0.0335745	-0.0263759	-0.0196088	-0.0234542	-0.0299669	-0.0790825	-0.0292849	-0.011745	-0.0174675	-0.023859	-0.0314925	-0.0211784	-0.0119605	-0.00419862	0	0	0	0	0	0
0	0	0	0	0	0	0	0	0	0	0	0	0	0	0	0	0	0	0	0	0	0	0	0	0	0	0	0	-0.0437843	-0.028266	-0.0282866	-0.0337104	-0.0162543	-0.0294738	-0.0361807	-0.0771355	-0.0368802	0.0011539	-0.0129512	-0.0231763	-0.0242457	-0.016831	-0.01114	-0.00223118	0.00148722	0	0	0	0	0
0	0	0	0	0	0	0	0	0	0	0	0	0	0	0	0	0	0	0	0	0	0	0	0	0	0	0	0	-0.0455704	-0.0322135	-0.0431666	-0.0339281	-0.0197615	-0.0326048	-0.0134828	-0.0111825	-0.011627	-0.0148616	-0.0193534	-0.0215193	-0.027616	-0.0226472	-0.0209984	-0.0252034	-0.0208774	-0.0522509	0	0	0	0
0	0	0	0	0	0	0	0	0	0	0	0	0	0	0	0	0	0	0	0	0	0	0	0	0	0	0	-0.0466497	-0.0398539	-0.0204912	-0.0315342	-0.0294269	-0.0157111	-0.0333814	-0.034522	-0.0310767	-0.024907	-0.0196274	-0.0202841	-0.0293257	-0.0233097	-0.0184345	-0.0144709	-0.0190194	-0.00885213	-0.00380226	-0.000547959	0	0	0
0	0	0	0	0	0	0	0	0	0	0	0	0	0	0	0	0	0	0	0	0	0	0	0	0	0	0	-0.04756	-0.0307058	-0.0240102	-0.0230362	-0.0163495	-0.0307846	-0.0520543	-0.0480078	-0.0402037	-0.0182132	-0.024032	-0.0126337	-0.0156088	-0.0148636	-0.0160982	-0.0154097	-0.0208216	-0.0178517	-0.0127607	-0.0135313	-0.00167884	0	0
0	0	0	0	0	0	0	0	0	0	0	0	0	0	0	0	0	0	0	0	0	0	0	0	0	0	0	0	-0.0330796	-0.0176444	-0.0241563	-0.0432208	-0.0364872	-0.0521535	-0.0269389	-0.0196102	-0.0118622	-0.0218508	-0.00906268	-0.0107364	-0.0141532	-0.0161777	-0.0112008	-0.0143064	-0.00711341	-0.00804446	-0.0271793	-0.000312696	0	0
0	0	0	0	0	0	0	0	0	0	0	0	0	0	0	0	0	0	0	0	0	0	0	0	0	0	0	0	-0.0356856	-0.0157299	-0.0270109	-0.0500764	-0.0230068	-0.0166125	-0.0056368	-0.00428411	-0.0231828	-0.01597	-0.0201673	-0.0128104	-0.0130305	-0.0179157	-0.014595	-0.0105119	-0.0129786	-0.0150749	-0.0142582	-0.00367827	0	0
0	0	0	0	0	0	0	0	0	0	0	0	0	0	0	0	0	0	0	0	0	0	0	0	0	0	0	0	-0.0403865	-0.0117536	-0.0276028	-0.0340624	-0.0353146	-0.0311079	-0.0260853	-0.0132681	-0.0162025	-0.0173304	-0.0219272	-0.00731787	-0.00700105	-0.0131296	-0.00483901	-0.0108521	-0.0149211	-0.0145906	-0.00855692	-0.00426143	0	0
0	0	0	0	0	0	0	0	0	0	0	0	0	0	0	0	0	0	0	0	0	0	0	0	0	0	0	0	-0.0364612	-0.00754758	-0.0125032	-0.0301548	-0.0174142	-0.00951178	-0.0180462	-0.0136861	-0.00879697	-0.0127914	-0.0123007	-0.014092	-0.00782183	-0.0191732	-0.02182	-0.00803775	-0.00177155	-0.00746416	-0.00198108	0	0	0
0	0	0	0	0	0	0	0	0	0	0	0	0	0	0	0	0	0	0	0	0	0	0	0	0	0	0	0	-0.0308002	-0.0219112	-0.0331479	-0.0168948	-0.00685427	-0.0102052	-0.020522	-0.00930183	-0.0199799	-0.0235666	-0.0195228	-0.0170456	-0.018668	-0.0186239	-0.0157431	-0.0183113	-0.0111089	-0.0189815	-0.014545	0	0	0
0	0	0	0	0	0	0	0	0	0	0	0	0	0	0	0	0	0	0	0	0	0	0	0	0	0	0	-0.0319314	-0.0199365	-0.0143121	-0.0285682	-0.0169608	-0.0121927	-0.00985436	-0.00687635	-0.0122639	0.000149611	-0.0115155	-0.00573083	-0.0147796	-0.0134464	-0.00709841	-0.0168451	-0.0219376	-0.00831121	0	0	0	0	0
0	0	0	0	0	0	0	0	0	0	0	0	0	0	0	0	0	0	0	0	0	0	0	0	0	0	0	0.0049318	-0.00511702	0.0147901	0.00990956	0.0230321	0.0240663	0.0221224	0.0316339	0.0076448	0.0356035	0.0644038	0.0697413	0.0731486	0.0543702	0.0538129	0	0	0	0	0	0	0	0
0	0	0	0	0	0	0	0	0	0	0	0	0	0	0	0	0	0	0	0	0	0	0	0	0	0	0	0	0	-0.003417	-0.00225912	-0.00829996	0.00612989	0	-0.0191075	0.00750009	0	0	0	0	0	0	0	0	0	0	0	0	0	0
0	0	0	0	0	0	0	0	0	0	0	0	0	0	0	0	0	0	0	0	0	0	0	0	0	0	0	0	0	0	0	0	0	0	0	0	0	0	0	0	0	0	0	0	0	0	0	0	0	0
0	0	0	0	0	0	0	0	0	0	0	0	0	0	0	0	0	0	0	0	0	0	0	0	0	0	0	0	0	0	0	0	0	0	0	0	0	0	0	0	0	0	0	0	0	0	0	0	0	0
0	0	0	0	0	0	0	0	0	0	0	0	0	0	0	0	0	0	0	0	0	0	0	0	0	0	0	0	0	0	0	0	0	0	0	0	0	0	0	0	0	0	0	0	0	0	0	0	0	0
0	0	0	0	0	0	0	0	0	0	0	0	0	0	0	0	0	0	0	0	0	0	0	0	0	0	0	0	0	0	0	0	0	0	0	0	0	0	0	0	0	0	0	0	0	0	0	0	0	0
0	0	0	0	0	0	0	0	0	0	0	0	0	0	0	0	0	0	0	0	0	0	0	0	0	0	0	0	0	0	0	0	0	0	0	0	0	0	0	0	0	0	0	0	0	0	0	0	0	0
0	0	0	0	0	0	0	0	0	0	0	0	0	0	0	0	0	0	0	0	0	0	0	0	0	0	0	0	0	0	0	0	0	0	0	0	0	0	0	0	0	0	0	0	0	0	0	0	0	0
0	0	0	0	0	0	0	0	0	0	0	0	0	0	0	0	0	0	0	0	0	0	0	0	0	0	0	0	0	0	0	0	0	0	0	0	0	0	0	0	0	0	0	0	0	0	0	0	0	0
0	0	0	0	0	0	0	0	0	0	0	0	0	0	0	0	0	0	0	0	0	0	0	0	0	0	0	0	0	0	0	0	0	0	0	0	0	0	0	0	0	0	0	0	0	0	0	0	0	0
0	0	0	0	0	0	0	0	0	0	0	0	0	0	0	0	0	0	0	0	0	0	0	0	0	0	0	0	0	0	0	0	0	0	0	0	0	0	0	0	0	0	0	0	0	0	0	0	0	0
0	0	0	0	0	0	0	0	0	0	0	0	0	0	0	0	0	0	0	0	0	0	0	0	0	0	0	0	0	0	0	0	0	0	0	0	0	0	0	0	0	0	0	0	0	0	0	0	0	0
0	0	0	0	0	0	0	0	0	0	0	0	0	0	0	0	0	0	0	0	0	0	0	0	0	0	0	0	0	0	0	0	0	0	0	0	0	0	0	0	0	0	0	0	0	0	0	0	0	0
0	0	0	0	0	0	0	0	0	0	0	0	0	0	0	0	0	0	0	0	0	0	0	0	0	0	0	0	0	0	0	0	0	0	0	0	0	0	0	0	0	0	0	0	0	0	0	0	0	0
0	0	0	0	0	0	0	0	0	0	0	0	0	0	0	0	0	0	0	0	0	0	0	0	0	0	0	0	0	0	0	0	0	0	0	0	0	0	0	0	0	0	0	0	0	0	0	0	0	0
0	0	0	0	0	0	0	0	0	0	0	0	0	0	0	0	0	0	0	0	0	0	0	0	0	0	0	0	0	0	0	0	0	0	0	0	0	0	0	0	0	0	0	0	0	0	0	0	0	0
0	0	0	0	0	0	0	0	0	0	0	0	0	0	0	0	0	0	0	0	0	0	0	0	0	0	0	0	0	0	0	0	0	0	0	0	0	0	0	0	0	0	0	0	0	0	0	0	0	0
0	0	0	0	0	0	0	0	0	0	0	0	0	0	0	0	0	0	0	0	0	0	0	0	0	0	0	0	0	0	0	0	0	0	0	0	0	0	0	0	0	0	0	0	0	0	0	0	0	0
0	0	0	0	0	0	0	0	0	0	0	0	0	0	0	0	0	0	0	0	0	0	0	0	0	0	0	0	0	0	0	0	0	0	0	0	0	0	0	0	0	0	0	0	0	0	0	0	0	0
0	0	0	0	0	0	0	0	0	0	0	0	0	0	0	0	0	0	0	0	0	0	0	0	0	0	0	0	0	0	0	0	0	0	0	0	0	0	0	0	0	0	0	0	0	0	0	0	0	0
0	0	0	0	0	0	0	0	0	0	0	0	0	0	0	0	0	0	0	0	0	0	0	0	0	0	0	0	0	0	0	0	0	0	0	0	0	0	0	0	0	0	0	0	0	0	0	0	0	0
0	0	0	0	0	0	0	0	0	0	0	0	0	0	0	0	0	0	0	0	0	0	0	0	0	0	0	0	0	0	0	0	0	0	0	0	0	0	0	0	0	0	0	0	0	0	0	0	0	0
0	0	0	0	0	0	0	0	0	0	0	0	0	0	0	0	0	0	0	0	0	0	0	0	0	0	0	0	0	0	0	0	0	0	0	0	0	0	0	0	0	0	0	0	0	0	0	0	0	0
0	0	0	0	0	0	0	0	0	0	0	0	0	0	0	0	0	0	0	0	0	0	0	0	0	0	0	0	0	0	0	0	0	0	0	0	0	0	0	0	0	0	0	0	0	0	0	0	0	0
0	0	0	0	0	0	0	0	0	0	0	0	0	0	0	0	0	0	0	0	0	0	0	0	0	0	0	0	0	0	0	0	0	0	0	0	0	0	0	0	0	0	0	0	0	0	0	0	0	0
0	0	0	0	0	0	0	0	0	0	0	0	0	0	0	0	0	0	0	0	0	0	0	0	0	0	0	0	0	0	0	0	0	0	0	0	0	0	0	0	0	0	0	0	0	0	0	0	0	0
0	0	0	0	0	0	0	0	0	0	0	0	0	0	0	0	0	0	0	0	0	0	0	0	0	0	0	0	0	0	0	0	0	0	0	0	0	0	0	0	0	0	0	0	0	0	0	0	0	0
0	0	0	0	0	0	0	0	0	0	0	0	0	0	0	0	0	0	0	0	0	0	0	0	0	0	0	0	0	0	0	0	0	0	0	0	0	0	0	0	0	0	0	0	0	0	0	0	0	0
0	0	0	0	0	0	0	0	0	0	0	0	0	0	0	0	0	0	0	0	0	0	0	0	0	0	0	0	0	0	0	0	0	0	0	0	0	0	0	0	0	0	0	0	0	0	0	0	0	0
0	0	0	0	0	0	0	0	0	0	0	0	0	0	0	0	0	0	0	0	0	0	0	0	0	0	0	0	0	0	0	0	0	0	0	0	0	0	0	0	0	0	0	0	0	0	0	0	0	0
0	0	0	0	0	0	0	0	0	0	0	0	0	0	0	0	0	0	0	0	0	0	0	0	0	0	0	0	0	0	0	0	0	0	0	0	0	0	0	0	0	0	0	0	0	0	0	0	0	0
0	0	0	0	0	0	0	0	0	0	0	0	0	0	0	0	0	0	0	0	0	0	0	0	0	0	0	0	0	-0.0212327	-0.0229909	-0.0170165	0.000400577	-0.0147805	-0.0115977	-0.00204079	-0.00457316	0	0	0	0	0	0	0	0	0	0	0	0	0
0	0	0	0	0	0	0	0	0	0	0	0	0	0	0	0	0	0	0	0	0	0	0	0	0	-0.0271079	-0.0254439	-0.031974	-0.02908	-0.0167277	-0.0219694	-0.0295625	-0.0112913	-0.00980965	-0.00183176	0.000385052	0.0081742	0.0114917	0.0115306	0.0127946	0	0	0	0	0	0	0	0	0	0
0	0	0	0	0	0	0	0	0	0	0	0	0	0	0	0	0	0	0	0	0	0	0	0	-0.0222388	-0.0182293	-0.0210398	-0.0315911	-0.0267912	-0.0202731	-0.0172176	-0.0262787	-0.0303469	-0.00837791	-0.00765149	-0.0318374	-0.00683548	-0.00202755	-0.00237967	0.00265817	-0.00163225	0.011326	0	0	0	0	0	0	0	0
0	0	0	0	0	0	0	0	0	0	0	0	0	0	0	0	0	0	0	0	0	0	0	-0.0394259	-0.0194188	-0.0186057	-0.0156645	-0.0298428	-0.0890161	-0.0923789	-0.0345021	-0.0151347	-0.0134964	-0.0178024	0.00821398	0.0280629	0.0531923	0.000913168	-0.0246942	0.0131221	0.037331	-0.00188828	-0.00535336	-0.0126355	0	0	0	0	0	0
0	0	0	0	0	0	0	0	0	0	0	0	0	0	0	0	0	0	0	0	0	0	-0.0312483	-0.0196763	-0.0109087	-0.0106783	-0.0061753	-0.0583449	-0.0491003	-0.0389367	-0.021736	-0.0117914	-0.0115724	-0.0209198	-0.00480698	-0.0112801	-0.0222599	-0.0279535	-0.0187234	0.00160677	-0.00746505	-0.00359936	-0.0105925	-0.018615	0	0	0	0	0	0
0	0	0	0	0	0	0	0	0	0	0	0	0	0	0	0	0	0	0	0	0	0	-0.034451	-0.0212078	0.0020457	-0.0169839	-0.0503358	-0.0515512	-0.0410585	-0.0172634	-0.00794097	-0.0020424	0.000203976	-0.0221814	-0.0094547	-0.0125704	-0.0193918	-0.00969086	-0.00543317	-0.00619042	-0.0115864	-0.00987898	-0.0120621	-0.0117337	0	0	0	0	0	0
0	0	0	0	0	0	0	0	0	0	0	0	0	0	0	0	0	0	0	0	0	-0.0303805	-0.0270967	-0.0201016	0.00415581	-0.0434392	-0.0339051	-0.0306176	-0.0272477	-0.0153111	0.00172394	-0.00419722	-0.0097671	-0.016591	-0.00986314	-0.0081975	-0.0140317	-0.00896436	-0.00817512	-0.0117839	-0.00844734	-0.00989154	-0.00722765	-0.016205	0	0	0	0	0	0
0	0	0	0	0	0	0	0	0	0	0	0	0	0	0	0	0	0	0	0	0	0	-0.00886018	-0.00235753	-0.0347733	-0.0445619	-0.029277	-0.0334614	-0.0022657	-0.00974051	0.00989393	0.0158261	-0.00557635	-0.00967716	-0.00540418	-0.00513869	0.00239776	-0.00326259	-0.0109004	-0.0126131	-0.00740129	-0.00618164	-0.0058112	-0.00844669	0.00345368	0	0	0	0	0
0	0	0	0	0	0	0	0	0	0	0	0	0	0	0	0	0	0	0	0	0	0	-0.0105957	0.00910019	-0.0687508	-0.0562542	-0.0145033	-0.00578009	0.00508557	-0.00337996	0.0193855	0.0284431	-0.00388978	-0.00326302	-8.26154e-05	0.00123335	-0.00171449	-0.00589386	-0.0121853	-0.00259383	-0.00781297	-0.00606747	-0.00512062	-0.0105496	-0.00585586	0	0	0	0	0
0	0	0	0	0	0	0	0	0	0	0	0	0	0	0	0	0	0	0	0	0	0	-0.0108386	-0.0123555	-0.0606054	-0.024353	0.0130779	0.0199579	-0.00182758	-0.00496185	0.0158578	0.0220601	0.00837473	7.67544e-05	0.00511199	8.27317e-05	0.00392922	0.000349551	-0.0069473	-0.00768419	-0.00196722	-0.00479739	-0.00903148	-0.0148866	-0.00976051	0	0	0	0	0
0	0	0	0	0	0	0	0	0	0	0	0	0	0	0	0	0	0	0	0	0	0	-0.0340672	-0.0414239	-0.0478352	-0.0104391	0.0122805	0.00741898	-0.0234742	-0.00796031	0.0186845	0.0431371	0.0268557	0.0170108	0.00796977	0.00242407	0.00307165	0.000448651	-0.00422185	-0.00683498	-0.0070116	-0.00239775	-0.00507143	-0.0120838	-0.00892517	0	0	0	0	0
0	0	0	0	0	0	0	0	0	0	0	0	0	0	0	0	0	0	0	0	0	0	0	-0.0339605	-0.00127727	0.00723204	0.0120821	-0.0002137	-0.0139137	0.0319914	0.0315458	0.0302222	0.0301027	0.0248142	0.0211021	0.0120398	-0.0092482	-0.0135107	-0.00819709	-0.00231067	-0.000900025	-0.000329095	-0.00562473	-0.0104766	0.00903782	0	0	0	0	0
0	0	0	0	0	0	0	0	0	0	0	0	0	0	0	0	0	0	0	0	0	0	0	-0.0250718	0.000775756	0.0102756	0.0160867	-0.0112077	-0.00260551	0.027233	0.027573	0.0331816	0.0373972	0.0216395	0.0189601	0.00754476	0.00697282	-0.00687232	-0.000660578	0.00357797	-0.000235316	-0.00598038	-0.0124534	-0.0197021	0	0	0	0	0	0
0	0	0	0	0	0	0	0	0	0	0	0	0	0	0	0	0	0	0	0	0	0	0	-0.0157661	0.00730283	0.00982014	0.024378	0.0153305	0.011257	0.0326571	0.0329437	0.0355735	0.0319844	0.0225557	0.0244811	0.0149261	0.00108559	-0.0100208	-0.00157926	0.00349249	0.00170209	-0.0031343	-0.0134389	-0.0195844	0	0	0	0	0	0
0	0	0	0	0	0	0	0	0	0	0	0	0	0	0	0	0	0	0	0	0	0	0	-0.0277868	0.00584685	0.0172955	0.0277789	0.00228939	0.00869144	0.0235216	0.0326313	0.0304942	0.0361281	0.0185058	0.0237398	0.0156503	-0.0148659	-0.00210424	0.00876599	0.00467103	-0.00655899	-0.0134981	-0.0129868	0	0	0	0	0	0	0
0	0	0	0	0	0	0	0	0	0	0	0	0	0	0	0	0	0	0	0	0	0	0	-0.0226528	-0.00369012	0.0310018	0.0376558	0.014368	0.0098206	0.0332379	0.0422745	0.0462012	0.0450139	0.018828	0.0257514	0.00743779	-0.0186375	-0.0107699	0.0108031	-0.00334514	-0.00888931	-0.00693837	-0.0157303	0	0	0	0	0	0	0
0	0	0	0	0	0	0	0	0	0	0	0	0	0	0	0	0	0	0	0	0	0	0	-0.0314295	-0.0155964	0.0222081	0.0383612	0.0182077	0.0161464	0.0444838	0.0495712	0.0558573	0.0534834	0.0226164	0.0316713	0.00859284	-0.00584064	0.0146109	0.0169518	-0.00178893	-0.00397185	-0.00208091	0	0	0	0	0	0	0	0
0	0	0	0	0	0	0	0	0	0	0	0	0	0	0	0	0	0	0	0	0	0	0	0	-0.0467512	-0.00731322	0.027738	0.036033	0.0490842	0.0289024	0.0618378	0.0496719	0.0517499	0.036684	0.0359918	-0.000677016	0.00480535	0.020103	0.0141473	0.00467158	0.00206964	0	0	0	0	0	0	0	0	0
0	0	0	0	0	0	0	0	0	0	0	0	0	0	0	0	0	0	0	0	0	0	0	0	0	-0.0237353	0.0310757	0.0273454	0.0511167	0.0362219	0.0590679	0.0296138	0.0469	0.0558379	0.0415619	-0.0168412	0.0133161	0.0265828	0.00397625	0.00208939	0	0	0	0	0	0	0	0	0	0
0	0	0	0	0	0	0	0	0	0	0	0	0	0	0	0	0	0	0	0	0	0	0	0	0	0	0	0	0	0.029931	0.0556995	0.00062228	0.0107368	0.0227515	-0.0236431	-0.00967937	0	0	0	0	0	0	0	0	0	0	0	0	0	0
0	0	0	0	0	0	0	0	0	0	0	0	0	0	0	0	0	0	0	0	0	0	0	0	0	0	0	0	0	0	0	0	0	0	0	0	0	0	0	0	0	0	0	0	0	0	0	0	0	0
0	0	0	0	0	0	0	0	0	0	0	0	0	0	0	0	0	0	0	0	0	0	0	0	0	0	0	0	0	0	0	0	0	0	0	0	0	0	0	0	0	0	0	0	0	0	0	0	0	0
0	0	0	0	0	0	0	0	0	0	0	0	0	0	0	0	0	0	0	0	0	0	0	0	0	0	0	0	0	0	0	0	0	0	0	0	0	0	0	0	0	0	0	0	0	0	0	0	0	0
0	0	0	0	0	0	0	0	0	0	0	0	0	0	0	0	0	0	0	0	0	0	0	0	0	0	0	0	0	0	0	0	0	0	0	0	0	0	0	0	0	0	0	0	0	0	0	0	0	0
0	0	0	0	0	0	0	0	0	0	0	0	0	0	0	0	0	0	0	0	0	0	0	0	0	0	0	0	0	0	0	0	0	0	0	0	0	0	0	0	0	0	0	0	0	0	0	0	0	0
0	0	0	0	0	0	0	0	0	0	0	0	0	0	0	0	0	0	0	0	0	0	0	0	0	0	0	0	0	0	0	0	0	0	0	0	0	0	0	0	0	0	0	0	0	0	0	0	0	0
0	0	0	0	0	0	0	0	0	0	0	0	0	0	0	0	0	0	0	0	0	0	0	0	0	0	0	0	0	0	0	0	0	0	0	0	0	0	0	0	0	0	0	0	0	0	0	0	0	0
0	0	0	0	0	0	0	0	0	0	0	0	0	0	0	0	0	0	0	0	0	0	0	0	0	0	0	0	0	0	0	0	0	0	0	0	0	0	0	0	0	0	0	0	0	0	0	0	0	0
0	0	0	0	0	0	0	0	0	0	0	0	0	0	0	0	0	0	0	0	0	0	0	0	0	0	0	0	0	0	0	0	0	0	0	0	0	0	0	0	0	0	0	0	0	0	0	0	0	0
0	0	0	0	0	0	0	0	0	0	0	0	0	0	0	0	0	0	0	0	0	0	0	0	0	0	0	0	0	0	0	0	0	0	0	0	0	0	0	0	0	0	0	0	0	0	0	0	0	0
0	0	0	0	0	0	0	0	0	0	0	0	0	0	0	0	0	0	0	0	0	0	0	0	0	0	0	0	0	0	0	0	0	0	0	0	0	0	0	0	0	0	0	0	0	0	0	0	0	0
0	0	0	0	0	0	0	0	0	0	0	0	0	0	0	0	0	0	0	0	0	0	0	0	0	0	0	0	0	0	0	0	0	0	0	0	0	0	0	0	0	0	0	0	0	0	0	0	0	0
0	0	0	0	0	0	0	0	0	0	0	0	0	0	0	0	0	0	0	0	0	0	0	0	0	0	0	0	0	0	0	0	0	0	0	0	0	0	0	0	0	0	0	0	0	0	0	0	0	0
0	0	0	0	0	0	0	0	0	0	0	0	0	0	0	0	0	0	0	0	0	0	0	0	0	0	0	0	0	0	0	0	0	0	0	0	0	0	0	0	0	0	0	0	0	0	0	0	0	0
0	0	0	0	0	0	0	0	0	0	0	0	0	0	0	0	0	0	0	0	0	0	0	0	0	0	0	0	0	0	0	0	0	0	0	0	0	0	0	0	0	0	0	0	0	0	0	0	0	0
0	0	0	0	0	0	0	0	0	0	0	0	0	0	0	0	0	0	0	0	0	0	0	0	0	0	0	0	0	0	0	0	0	0	0	0	0	0	0	0	0	0	0	0	0	0	0	0	0	0
0	0	0	0	0	0	0	0	0	0	0	0	0	0	0	0	0	0	0	0	0	0	0	0	0	0	0	0	0	0	0	0	0	0	0	0	0	0	0	0	0	0	0	0	0	0	0	0	0	0
0	0	0	0	0	0	0	0	0	0	0	0	0	0	0	0	0	0	0	0	0	0	0	0	0	0	0	0	0	0	0	0	0	0	0	0	0	0	0	0	0	0	0	0	0	0	0	0	0	0
0	0	0	0	0	0	0	0	0	0	0	0	0	0	0	0	0	0	0	0	0	0	0	0	0	0	0	0	0	0	0	0	0	0	0	0	0	0	0	0	0	0	0	0	0	0	0	0	0	0
0	0	0	0	0	0	0	0	0	0	0	0	0	0	0	0	0	0	0	0	0	0	0	0	0	0	0	0	0	0	0	0	0	0	0	0	0	0	0	0	0	0	0	0	0	0	0	0	0	0
0	0	0	0	0	0	0	0	0	0	0	0	0	0	0	0	0	0	0	0	0	0	0	0	0	0	0	0	0	0	0	0	0	0	0	0	0	0	0	0	0	0	0	0	0	0	0	0	0	0
0	0	0	0	0	0	0	0	0	0	0	0	0	0	0	0	0	0	0	0	0	0	0	0	0	0	0	0	0	0	0	0	0	0	0	0	0	0	0	0	0	0	0	0	0	0	0	0	0	0
0	0	0	0	0	0	0	0	0	0	0	0	0	0	0	0	0	0	0	0	0	0	0	0	0	0	0	0	0	0	0	0	0	0	0	0	0	0	0	0	0	0	0	0	0	0	0	0	0	0
0	0	0	0	0	0	0	0	0	0	0	0	0	0	0	0	0	0	0	0	0	0	0	0	0	0	0	0	0	0	0	0	0	0	0	0	0	0	0	0	0	0	0	0	0	0	0	0	0	0
0	0	0	0	0	0	0	0	0	0	0	0	0	0	0	0	0	0	0	0	0	0	0	0	0	0	0	0	0	0	0	0	0	0	0	0	0	0	0	0	0	0	0	0	0	0	0	0	0	0
0	0	0	0	0	0	0	0	0	0	0	0	0	0	0	0	0	0	0	0	0	0	0	0	0	0	0	0	0	0	0	0	0	0	0	0	0	0	0	0	0	0	0	0	0	0	0	0	0	0
0	0	0	0	0	0	0	0	0	0	0	0	0	0	0	0	0	0	0	0	0	0	0	0	0	0	0	0	0	0	0	0	0	0	0	0	0	0	0	0	0	0	0	0	0	0	0	0	0	0
0	0	0	0	0	0	0	0	0	0	0	0	0	0	0	0	0	0	0	0	0	0	0	0	0	0	0	0	0	0	0	0	0	0	0	0	0	0	0	0	0	0	0	0	0	0	0	0	0	0
0	0	0	0	0	0	0	0	0	0	0	0	0	0	0	0	0	0	0	0	0	0	-0.0930496	-0.0622184	-0.0319254	0	0	0	0	0	0	0	0	0	0	0	0	0	0	0	0	0	0	0	0	0	0	0	0	0
0	0	0	0	0	0	0	0	0	0	0	0	0	0	0	0	0	0	0	0	0	-0.0748952	-0.0658444	-0.0481286	-0.0543523	-0.00653555	0.00405515	-0.0180605	0	0	0	0	0	0	0	0	0	0	0	0	0	0	0	0	0	0	0	0	0	0
0	0	0	0	0	0	0	0	0	0	0	0	0	0	0	0	0	0	0	0	0	0.000903829	-0.0302196	-0.0556054	-0.110456	-0.0235617	0.0404335	0.0744733	0.100746	0.195952	0	0	0	0	0	0	0	0	0	0	0	0	0	0	0	0	0	0	0	0
0	0	0	0	0	0	0	0	0	0	0	0	0	0	0	0	0	0	0	0	-0.100394	-0.0737466	-0.0542643	-0.0419361	-0.0105115	-0.0121198	0.0208782	0.0389881	0.0478974	0.0174108	0.023518	0.0230978	0.023208	0	0	0	0	0	0	0	0	0	0	0	0	0	0	0	0	0
0	0	0	0	0	0	0	0	0	0	0	0	0	0	0	0	0	0	0	-0.00705805	-0.0554307	-0.0473251	-0.0490785	-0.0396838	-0.0180855	-0.0259336	0.00545081	0.0343707	0.0436751	0.0207298	0.000765015	0.015963	0.0217759	0.00222361	-0.000531287	0	0	0	0	0	0	0	0	0	0	0	0	0	0	0
0	0	0	0	0	0	0	0	0	0	0	0	0	0	0	0	0	0	-0.048721	0.000559414	-0.0236889	-0.0173288	-0.0245938	-0.0275804	-0.0216712	-0.0191234	0.00725315	0.0418683	0.0608415	0.00997853	-0.0316046	0.0233711	0.038586	0.00669577	0.0101572	0.00747735	0	0	0	0	0	0	0	0	0	0	0	0	0	0
0	0	0	0	0	0	0	0	0	0	0	0	0	0	0	0	0	-0.0621081	-0.0237325	0.00696542	-0.00517574	0.000397913	-0.00959145	-0.0142936	-0.00299564	-0.00411664	0.0136769	0.0239689	0.0567331	0.0442723	-0.010636	0.0128558	0.00991253	0.0100847	0.0179945	0.0088608	0	0	0	0	0	0	0	0	0	0	0	0	0	0
0	0	0	0	0	0	0	0	0	0	0	0	0	0	0	0	0	-0.0423153	-0.00132102	0.0203304	0.00257754	0.0221357	0.0338219	0.0286417	-0.00397967	0.010227	0.0159612	0.0332017	0.0393062	0.0413743	0.0157839	0.0043187	0.00912692	-0.000319474	0.012166	0.00708099	0.000429981	0	0	0	0	0	0	0	0	0	0	0	0	0
0	0	0	0	0	0	0	0	0	0	0	0	0	0	0	0	-0.0481341	-0.0403024	5.96762e-05	0.00372857	-0.0156691	0.00337397	0.0309465	0.0179094	0.00992035	0.0122895	0.0192119	0.0194184	0.0271581	0.0350996	0.033435	0.0186974	0.00437183	-0.00819444	0.0172171	0.012293	0.00499411	0.00505397	0	0	0	0	0	0	0	0	0	0	0	0
0	0	0	0	0	0	0	0	0	0	0	0	0	0	0	0	-0.0361854	-0.043474	-0.00472807	0.0155227	0.0135305	0.0202795	0.0192096	0.0247113	0.0329576	0.0224886	0.0261116	0.0327157	0.0235971	0.0314883	0.0174724	0.00520079	0.0111668	-0.0105628	0.00417333	0.00294921	-0.00133802	0.000132424	0	0	0	0	0	0	0	0	0	0	0	0
0	0	0	0	0	0	0	0	0	0	0	0	0	0	0	0	-0.160033	-0.316738	-0.581691	-0.573444	-0.331002	-0.330225	-0.572839	-0.74994	-0.643784	-0.404219	-0.241919	-0.228486	-0.219644	-0.0867303	-0.0260115	-0.0291346	-0.0480246	-0.116676	-0.12755	-0.109808	-0.0740077	-0.0344388	-0.0245531	0	0	0	0	0	0	0	0	0	0	0
0	0	0	0	0	0	0	0	0	0	0	0	0	0	0	0	0	-0.042586	-0.027094	-0.0155889	-0.030592	-0.0353198	-0.0285654	-0.0217932	-0.0133867	0.00337691	-0.00883573	-0.0192503	-0.00919268	-0.0102242	-0.0135394	-0.00996784	0.0016088	-0.0123896	-0.00395942	-0.0041552	-0.0132865	-0.0138794	-0.0133812	0	0	0	0	0	0	0	0	0	0	0
0	0	0	0	0	0	0	0	0	0	0	0	0	0	0	0	0	-0.0390695	-0.0311574	-0.0144171	-0.0209036	-0.033892	-0.0178157	-0.00735032	-0.00430455	-0.00585251	-0.0127567	-0.0120516	-0.0108248	-0.0142355	-0.0162829	-0.018431	-0.008206	-0.0259677	-0.00374481	-0.00565153	-0.015208	-0.0113498	-0.0178673	0	0	0	0	0	0	0	0	0	0	0
0	0	0	0	0	0	0	0	0	0	0	0	0	0	0	0	0	-0.0406673	-0.0333292	-0.024281	-0.0175175	-0.0230782	-0.0148052	-0.0193267	-0.012516	-0.0137371	-0.0119833	-0.0246268	-0.016409	-0.00910056	-0.0262989	-0.0194964	-0.0120596	-0.0194108	-0.00898537	-0.0169663	-0.0131487	-0.012496	-0.0182389	0	0	0	0	0	0	0	0	0	0	0
0	0	0	0	0	0	0	0	0	0	0	0	0	0	0	0	0	-0.0400695	-0.0399217	-0.028755	-0.0112767	-0.0136095	-0.0189695	-0.0286557	-0.0114816	-0.00811308	-0.0149528	-0.0357597	-0.0244534	-0.0194087	-0.0263815	-0.0207124	-0.012203	-0.0251597	-0.0103815	-0.0173577	-0.017583	-0.0182634	-0.0219907	0	0	0	0	0	0	0	0	0	0	0
0	0	0	0	0	0	0	0	0	0	0	0	0	0	0	0	0	0	-0.03503	-0.033586	-0.0173656	-0.0203249	-0.0225153	-0.0288079	-0.0182279	-0.0202478	-0.0194267	-0.0251361	-0.0345807	-0.0234517	-0.0253227	-0.0312731	-0.023005	-0.0327773	-0.0199493	-0.0241864	-0.0172408	-0.0207722	0	0	0	0	0	0	0	0	0	0	0	0
0	0	0	0	0	0	0	0	0	0	0	0	0	0	0	0	0	0	-0.0263621	-0.0237709	-0.0405097	-0.0218142	-0.0181957	-0.0286875	-0.0230605	-0.0309655	-0.0292778	-0.0287116	-0.0273435	-0.0261784	-0.0385351	-0.0381641	-0.0292257	-0.0308384	-0.0222179	-0.0235205	-0.0146514	-0.0151471	0	0	0	0	0	0	0	0	0	0	0	0
0	0	0	0	0	0	0	0	0	0	0	0	0	0	0	0	0	0	0	0	0	0	-0.0298425	-0.026756	-0.0231573	-0.031411	-0.0317975	-0.0351792	-0.0348112	-0.0319382	-0.0387147	-0.0461906	0	0	0	0	0	0	0	0	0	0	0	0	0	0	0	0	0	0
0	0	0	0	0	0	0	0	0	0	0	0	0	0	0	0	0	0	0	0	0	0	0	0	-0.0342808	-0.0418604	-0.0326292	-0.0461602	-0.0373858	-0.0318204	0	0	0	0	0	0	0	0	0	0	0	0	0	0	0	0	0	0	0	0
0	0	0	0	0	0	0	0	0	0	0	0	0	0	0	0	0	0	0	0	0	0	0	0	0	0	0	0	0	0	0	0	0	0	0	0	0	0	0	0	0	0	0	0	0	0	0	0	0	0
0	0	0	0	0	0	0	0	0	0	0	0	0	0	0	0	0	0	0	0	0	0	0	0	0	0	0	0	0	0	0	0	0	0	0	0	0	0	0	0	0	0	0	0	0	0	0	0	0	0
0	0	0	0	0	0	0	0	0	0	0	0	0	0	0	0	0	0	0	0	0	0	0	0	0	0	0	0	0	0	0	0	0	0	0	0	0	0	0	0	0	0	0	0	0	0	0	0	0	0
0	0	0	0	0	0	0	0	0	0	0	0	0	0	0	0	0	0	0	0	0	0	0	0	0	0	0	0	0	0	0	0	0	0	0	0	0	0	0	0	0	0	0	0	0	0	0	0	0	0
0	0	0	0	0	0	0	0	0	0	0	0	0	0	0	0	0	0	0	0	0	0	0	0	0	0	0	0	0	0	0	0	0	0	0	0	0	0	0	0	0	0	0	0	0	0	0	0	0	0
0	0	0	0	0	0	0	0	0	0	0	0	0	0	0	0	0	0	0	0	0	0	0	0	0	0	0	0	0	0	0	0	0	0	0	0	0	0	0	0	0	0	0	0	0	0	0	0	0	0
0	0	0	0	0	0	0	0	0	0	0	0	0	0	0	0	0	0	0	0	0	0	0	0	0	0	0	0	0	0	0	0	0	0	0	0	0	0	0	0	0	0	0	0	0	0	0	0	0	0
0	0	0	0	0	0	0	0	0	0	0	0	0	0	0	0	0	0	0	0	0	0	0	0	0	0	0	0	0	0	0	0	0	0	0	0	0	0	0	0	0	0	0	0	0	0	0	0	0	0
0	0	0	0	0	0	0	0	0	0	0	0	0	0	0	0	0	0	0	0	0	0	0	0	0	0	0	0	0	0	0	0	0	0	0	0	0	0	0	0	0	0	0	0	0	0	0	0	0	0
0	0	0	0	0	0	0	0	0	0	0	0	0	0	0	0	0	0	0	0	0	0	0	0	0	0	0	0	0	0	0	0	0	0	0	0	0	0	0	0	0	0	0	0	0	0	0	0	0	0
0	0	0	0	0	0	0	0	0	0	0	0	0	0	0	0	0	0	0	0	0	0	0	0	0	0	0	0	0	0	0	0	0	0	0	0	0	0	0	0	0	0	0	0	0	0	0	0	0	0
0	0	0	0	0	0	0	0	0	0	0	0	0	0	0	0	0	0	0	0	0	0	0	0	0	0	0	0	0	0	0	0	0	0	0	0	0	0	0	0	0	0	0	0	0	0	0	0	0	0
0	0	0	0	0	0	0	0	0	0	0	0	0	0	0	0	0	0	0	0	0	0	0	0	0	0	0	0	0	0	0	0	0	0	0	0	0	0	0	0	0	0	0	0	0	0	0	0	0	0
0	0	0	0	0	0	0	0	0	0	0	0	0	0	0	0	0	0	0	0	0	0	0	0	0	0	0	0	0	0	0	0	0	0	0	0	0	0	0	0	0	0	0	0	0	0	0	0	0	0
0	0	0	0	0	0	0	0	0	0	0	0	0	0	0	0	0	0	0	0	0	0	0	0	0	0	0	0	0	0	0	0	0	0	0	0	0	0	0	0	0	0	0	0	0	0	0	0	0	0
0	0	0	0	0	0	0	0	0	0	0	0	0	0	0	0	0	0	0	0	0	0	0	0	0	0	0	0	0	0	0	0	0	0	0	0	0	0	0	0	0	0	0	0	0	0	0	0	0	0
0	0	0	0	0	0	0	0	0	0	0	0	0	0	0	0	0	0	0	0	0	0	0	0	0	0	0	0	0	0	0	0	0	0	0	0	0	0	0	0	0	0	0	0	0	0	0	0	0	0
0	0	0	0	0	0	0	0	0	0	0	0	0	0	0	0	0	0	0	0	0	0	0	0	0	0	0	0	0	0	-0.0172325	-0.00269374	0.0186572	-0.00399259	-0.00851094	-0.00431213	-0.0120318	0	0	0	0	0	0	0	0	0	0	0	0	0
0	0	0	0	0	0	0	0	0	0	0	0	0	0	0	0	0	0	0	0	0	0	0	0	0	-0.0145931	0.0521738	0.0351862	0.00284734	0.0221008	-0.00386651	0.0037328	0.00971034	-0.00292415	0.0065178	0.00351635	-0.00534706	-0.00142272	-0.00536587	0	0	0	0	0	0	0	0	0	0	0
0	0	0	0	0	0	0	0	0	0	0	0	0	0	0	0	0	0	0	0	0	0	0	0	-0.0313132	0.00995285	0.0593979	0.0401976	0.0219953	0.0118272	0.00688385	0.00231352	-0.0095575	-0.0127441	0.0169935	0.0252933	0.0103253	0.00410654	-0.000774942	-0.000385321	0	0	0	0	0	0	0	0	0	0
0	0	0	0	0	0	0	0	0	0	0	0	0	0	0	0	0	0	0	0	0	0	0	-0.0214553	0.0112478	0.0519871	0.0433148	0.0208731	0.0283196	0.00523978	0.0291755	0.0236822	0.0207861	-0.0619506	-0.0497308	-0.00065982	0.0219179	0.017187	0.00624238	0.000368818	-0.000228452	0	0	0	0	0	0	0	0	0
0	0	0	0	0	0	0	0	0	0	0	0	0	0	0	0	0	0	0	0	0	0	0	-0.0401218	0.0171883	0.0586402	0.0214158	0.0200529	0.0361928	0.0269999	0.0382227	0.0280393	0.0278467	-0.0319266	-0.0334267	-0.0204567	-0.00392005	0.0118631	0.0110217	0.00441705	-0.00525399	0.00240747	-0.00639749	0	0	0	0	0	0	0
0	0	0	0	0	0	0	0	0	0	0	0	0	0	0	0	0	0	0	0	0	0	0	-0.0568291	-0.0242619	0.0493313	0.0414284	-0.0244767	0.0108669	0.039939	0.0386521	0.0267566	0.0234202	0.00832587	-0.0188568	-0.0100433	-0.0142914	-0.0280354	-0.000804656	0.0106673	-0.00464173	-0.00790048	-0.0105619	-0.0148644	0	0	0	0	0	0
0	0	0	0	0	0	0	0	0	0	0	0	0	0	0	0	0	0	0	0	0	0	0	-0.0876717	0.00105545	-0.0125669	0.0081967	-0.0132292	0.0182923	-0.00522927	0.019586	-0.000105259	0.0141361	0.0154658	-0.0137036	-0.0211026	0.00246912	-0.00366968	-0.0136854	-0.0168257	-0.0100381	-0.00967909	-0.0121622	-0.0163286	-0.0107056	0	0	0	0	0
0	0	0	0	0	0	0	0	0	0	0	0	0	0	0	0	0	0	0	0	0	0	0	-0.0671976	-0.0266573	-0.0246136	0.0183684	0.0082441	-0.0278598	-0.0143244	0.0265178	-0.00575571	0.00806926	0.00868376	-0.00710127	-0.0166015	-0.00363169	-0.00664175	-0.0183149	-0.0169246	-0.0222716	-0.0163574	-0.0113223	-0.018679	-0.0167884	-0.0219301	0	0	0	0
0	0	0	0	0	0	0	0	0	0	0	0	0	0	0	0	0	0	0	0	0	0	0	0	-0.0351421	-0.0421697	0.0252231	0.0138765	-0.130345	-0.0113058	0.0252117	-0.0126716	-0.00872365	0.0045064	-0.00326923	-0.0235378	-0.00449503	-0.0111611	-0.0186905	-0.0203786	-0.0222858	-0.0250641	-0.0190064	-0.0184223	-0.0165059	-0.0142293	0	0	0	0
0	0	0	0	0	0	0	0	0	0	0	0	0	0	0	0	0	0	0	0	0	0	0	0	-0.0440395	-0.085353	0.0241853	-0.0264471	-0.0620697	0.0172429	0.00254208	-0.00646704	-0.0160064	-0.00349163	0.00713951	-0.0220588	-0.0135799	-0.0164005	-0.0189737	-0.0291162	-0.0272905	-0.0275894	-0.0231491	-0.0160588	-0.0126036	-0.0159247	0	0	0	0
0	0	0	0	0	0	0	0	0	0	0	0	0	0	0	0	0	0	0	0	0	0	0	0	-0.0402222	-0.0732173	-0.000374099	-0.053612	0.0136653	0.00300986	-0.0259274	-0.00561679	-0.000681196	-0.025811	0.0202084	-0.016105	-0.0196692	-0.0133149	-0.0221508	-0.0268049	-0.0264695	-0.0345333	-0.0217946	-0.00337664	-0.0180744	-0.00733442	0	0	0	0
0	0	0	0	0	0	0	0	0	0	0	0	0	0	0	0	0	0	0	0	0	0	0	0	-0.0447901	-0.0111849	-0.00837805	-0.003573	0.00433211	-0.00825179	-0.0549804	-0.00307971	0.0168074	-0.0239487	0.0117108	0.00135603	-0.012291	-0.00536844	-0.0190145	-0.0291028	-0.0309851	-0.0245626	-0.0203173	0.00270078	-0.0084255	-0.00588403	0	0	0	0
0	0	0	0	0	0	0	0	0	0	0	0	0	0	0	0	0	0	0	0	0	0	0	0	0	-0.0436914	0.00260829	0.00497396	-0.0420605	-0.0415245	-0.0191807	-0.0194732	-0.0274213	-0.0332971	0.0224681	-0.00388341	-0.0193771	-0.00823689	-0.0175826	-0.0283356	-0.0287096	-0.0274259	-0.0123114	0.0139268	0.00116024	-0.000258295	0	0	0	0
0	0	0	0	0	0	0	0	0	0	0	0	0	0	0	0	0	0	0	0	0	0	0	0	0	0	-0.0230209	-0.0385006	-0.0699848	-0.00511038	-0.0448555	-0.0825254	-0.0618139	-0.0203275	0.0249239	-0.0131777	-0.0105905	-0.0131414	-0.0227132	-0.0274005	-0.0181185	-0.000789757	-0.00210085	0.0139611	0	0	0	0	0	0
0	0	0	0	0	0	0	0	0	0	0	0	0	0	0	0	0	0	0	0	0	0	0	0	0	0	0	-0.0356723	-0.0502685	-0.01555	-0.0257228	-0.061002	-0.0410216	-0.0539541	-0.0447608	-0.0307559	-0.0199359	-0.0268197	-0.0146429	0.00934711	0.0176248	0.029774	0.0210386	0	0	0	0	0	0	0
0	0	0	0	0	0	0	0	0	0	0	0	0	0	0	0	0	0	0	0	0	0	0	0	0	0	0	-0.0420481	-0.0411435	-0.019973	-0.0330221	-0.0485437	-0.0430378	-0.0373035	-0.0270634	-0.0163829	-0.00813126	-0.00479305	-0.00616395	0.00202714	0.00327449	0.00363822	0	0	0	0	0	0	0	0
0	0	0	0	0	0	0	0	0	0	0	0	0	0	0	0	0	0	0	0	0	0	0	0	0	0	0	0	-0.0204758	-0.0251189	-0.0316344	-0.0420975	-0.0487403	-0.0447731	-0.0329102	-0.0219199	-0.00603593	-0.000532189	0.00381291	0.00240694	-0.00620321	0	0	0	0	0	0	0	0	0
0	0	0	0	0	0	0	0	0	0	0	0	0	0	0	0	0	0	0	0	0	0	0	0	0	0	0	0	0	-0.0277815	-0.0435745	-0.037014	-0.0376016	-0.043669	-0.0264994	-0.0222075	-0.00922143	-0.00412045	0.00226894	-0.00647929	0	0	0	0	0	0	0	0	0	0
0	0	0	0	0	0	0	0	0	0	0	0	0	0	0	0	0	0	0	0	0	0	0	0	0	0	0	0	0	0	-0.0411574	-0.0436078	-0.0247251	-0.0276173	-0.0204147	-0.0186926	-0.0172765	-0.00792964	0	0	0	0	0	0	0	0	0	0	0	0
0	0	0	0	0	0	0	0	0	0	0	0	0	0	0	0	0	0	0	0	0	0	0	0	0	0	0	0	0	0	0	0	0	0	0	0	0	0	0	0	0	0	0	0	0	0	0	0	0	0
0	0	0	0	0	0	0	0	0	0	0	0	0	0	0	0	0	0	0	0	0	0	0	0	0	0	0	0	0	0	0	0	0	0	0	0	0	0	0	0	0	0	0	0	0	0	0	0	0	0
0	0	0	0	0	0	0	0	0	0	0	0	0	0	0	0	0	0	0	0	0	0	0	0	0	0	0	0	0	0	0	0	0	0	0	0	0	0	0	0	0	0	0	0	0	0	0	0	0	0
0	0	0	0	0	0	0	0	0	0	0	0	0	0	0	0	0	0	0	0	0	0	0	0	0	0	0	0	0	0	0	0	0	0	0	0	0	0	0	0	0	0	0	0	0	0	0	0	0	0
0	0	0	0	0	0	0	0	0	0	0	0	0	0	0	0	0	0	0	0	0	0	0	0	0	0	0	0	0	0	0	0	0	0	0	0	0	0	0	0	0	0	0	0	0	0	0	0	0	0
0	0	0	0	0	0	0	0	0	0	0	0	0	0	0	0	0	0	0	0	0	0	0	0	0	0	0	0	0	0	0	0	0	0	0	0	0	0	0	0	0	0	0	0	0	0	0	0	0	0
0	0	0	0	0	0	0	0	0	0	0	0	0	0	0	0	0	0	0	0	0	0	0	0	0	0	0	0	0	0	0	0	0	0	0	0	0	0	0	0	0	0	0	0	0	0	0	0	0	0
0	0	0	0	0	0	0	0	0	0	0	0	0	0	0	0	0	0	0	0	0	0	0	0	0	0	0	0	0	0	0	0	0	0	0	0	0	0	0	0	0	0	0	0	0	0	0	0	0	0
0	0	0	0	0	0	0	0	0	0	0	0	0	0	0	0	0	0	0	0	0	0	0	0	0	0	0	0	0	0	0	0	0	0	0	0	0	0	0	0	0	0	0	0	0	0	0	0	0	0
0	0	0	0	0	0	0	0	0	0	0	0	0	0	0	0	0	0	0	0	0	0	0	0	0	0	0	0	0	0	0	0	0	0	0	0	0	0	0	0	0	0	0	0	0	0	0	0	0	0
0	0	0	0	0	0	0	0	0	0	0	0	0	0	0	0	0	0	0	0	0	0	0	0	0	0	0	0	0	0	0	0	0	0	0	0	0	0	0	0	0	0	0	0	0	0	0	0	0	0
0	0	0	0	0	0	0	0	0	0	0	0	0	0	0	0	0	0	0	0	0	0	0	0	0	0	0	0	0	0	0	0	0	0	0	0	0	0	0	0	0	0	0	0	0	0	0	0	0	0
0	0	0	0	0	0	0	0	0	0	0	0	0	0	0	0	0	0	0	0	0	0	0	0	0	0	0	0	0	0	0	0	0	0	0	0	0	0	0	0	0	0	0	0	0	0	0	0	0	0
0	0	0	0	0	0	0	0	0	0	0	0	0	0	0	0	0	0	0	0	0	0	0	0	0	0	0	0	0	0	0	0	0	0	0	0	0	0	0	0	0	0	0	0	0	0	0	0	0	0
0	0	0	0	0	0	0	0	0	0	0	0	0	0	0	0	0	0	0	0	0	0	0	0	0	0	0	0	0	0	0	0	0	0	0	0	0	0	0	0	0	0	0	0	0	0	0	0	0	0
0	0	0	0	0	0	0	0	0	0	0	0	0	0	0	0	0	0	0	0	0	0	0	0	0	0	0	0	0	0	0	0	0	0	0	0	0	0	0	0	0	0	0	0	0	0	0	0	0	0
0	0	0	0	0	0	0	0	0	0	0	0	0	0	0	0	0	0	0	0	0	0	0	0	0	0	0	0	0	0	0	0	0	0	0	0	0	0	0	0	0	0	0	0	0	0	0	0	0	0
0	0	0	0	0	0	0	0	0	0	0	0	0	0	0	0	0	0	0	0	0	0	0	0	0	0	0	0	0	0	0	0	0	0	0	0	0	0	0	0	0	0	0	0	0	0	0	0	0	0
0	0	0	0	0	0	0	0	0	0	0	0	0	0	0	0	0	0	0	0	0	0	0	0	0	0	0	0	0	0	0	0	0	0	0	0	0	0	0	0	0	0	0	0	0	0	0	0	0	0
0	0	0	0	0	0	0	0	0	0	0	0	0	0	0	0	0	0	0	0	0	0	0	0	0	0	0	0	0	0	0	0	0	0	0	0	0	0	0	0	0	0	0	0	0	0	0	0	0	0
0	0	0	0	0	0	0	0	0	0	0	0	0	0	0	0	0	0	0	0	0	0	0	0	0	0	0	0	0	0	0	0	0	0	0	0	0	0	0	0	0	0	0	0	0	0	0	0	0	0
0	0	0	0	0	0	0	0	0	0	0	0	0	0	0	0	0	0	0	0	0	0	0	0	0	0	0	0	0	0	0	0	0	0	0	0	0	0	0	0	0	0	0	0	0	0	0	0	0	0
0	0	0	0	0	0	0	0	0	0	0	0	0	0	0	0	0	0	0	0	0	0	0	0	0	0	0	0	0	0	0	0	0	0	0	0	0	0	0	0	0	0	0	0	0	0	0	0	0	0
0	0	0	0	0	0	0	0	0	0	0	0	0	0	0	0	0	0	0	0	0	0	0	0	0	0	0	0	0	0	0	0	0	0	0	0	0	0	0	0	0	0	0	0	0	0	0	0	0	0
0	0	0	0	0	0	0	0	0	0	0	0	0	0	0	0	0	0	0	0	0	0	0	0	0	0	0	0	0	0	0	0	0	0	0	0	0	0	0	0	0	0	0	0	0	0	0	0	0	0
0	0	0	0	0	0	0	0	0	0	0	0	0	0	0	0	0	0	0	0	0	0	0	0	0	0	0	0	0	0	0	0	0	0	0	0	0	0	0	0	0	0	0	0	0	0	0	0	0	0
0	0	0	0	0	0	0	0	0	0	0	0	0	0	0	0	0	0	0	0	0	0	0	0	0	0	0	0	0	0	0	0	0	0	0	0	0	0	0	0	0	0	0	0	0	0	0	0	0	0
0	0	0	0	0	0	0	0	0	0	0	0	0	0	0	0	0	0	0	0	0	0	0	0	0	0	0	0	0	0	0	0	0	0	0	0	0	0	0	0	0	0	0	0	0	0	0	0	0	0
0	0	0	0	0	0	0	0	0	0	0	0	0	0	0	0	0	0	0	0	0	0	0	0	0	0	0	0	0	0	0	0	0	0	-0.0520911	-0.0227155	-0.0214183	-0.0252299	-0.0289637	-0.0276024	-0.0247136	-0.0258422	-0.00750061	0	0	0	0	0	0	0
0	0	0	0	0	0	0	0	0	0	0	0	0	0	0	0	0	0	0	0	0	0	0	0	0	0	0	0	0	0	0	0	0	-0.0448456	-0.0180018	-0.0175761	-0.0196462	-0.0274213	-0.0331273	-0.027223	-0.0292267	-0.0178931	-0.010456	-0.0016137	0	0	0	0	0	0
0	0	0	0	0	0	0	0	0	0	0	0	0	0	0	0	0	0	0	0	0	0	0	0	0	0	0	0	0	0	0	0	-0.0351961	-0.0172965	-0.0151792	-0.0231299	-0.0324801	-0.032511	-0.0353028	-0.046128	-0.0170604	-0.00556264	-0.00702386	0.0118244	0.00664995	0	0	0	0	0
0	0	0	0	0	0	0	0	0	0	0	0	0	0	0	0	0	0	0	0	0	0	0	0	0	0	0	0	0	0	0	-0.0397188	-0.0379032	-0.0371819	-0.0361509	-0.0367851	-0.0294198	-0.0375754	-0.0288493	-0.0115913	-0.0409579	-0.0326153	-0.0300509	0.0131237	0.00550843	-0.00685832	0	0	0	0
0	0	0	0	0	0	0	0	0	0	0	0	0	0	0	0	0	0	0	0	0	0	0	0	0	0	0	0	0	0	-0.0473281	-0.0417097	-0.0339121	-0.0356868	-0.0329214	-0.0371455	-0.0411649	-0.0380374	-0.0263527	-0.0235787	-0.0229855	-0.00930698	-0.0160438	-0.0103909	0.0167554	0.00358251	0.00147692	0	0	0
0	0	0	0	0	0	0	0	0	0	0	0	0	0	0	0	0	0	0	0	0	0	0	0	0	0	0	0	0	-0.0513294	-0.0492486	-0.0499457	-0.0283939	-0.0405142	-0.0355005	-0.0375107	-0.036573	-0.0357266	-0.0299607	-0.0243946	-0.0172639	-0.00640216	-0.00540057	-0.00107644	-0.019498	-0.0107039	0.00121021	0.00894768	0	0
0	0	0	0	0	0	0	0	0	0	0	0	0	0	0	0	0	0	0	0	0	0	0	0	0	0	0	0	0	-0.0450967	-0.037558	-0.0276955	0.0217263	0.0021801	-0.0125759	-0.0244705	-0.0659155	-0.061617	-0.0510218	-0.0511736	-0.0464954	-0.0353173	0.00545533	0.0282541	-0.00172479	-0.00936395	-0.0211778	-0.0350277	0	0
0	0	0	0	0	0	0	0	0	0	0	0	0	0	0	0	0	0	0	0	0	0	0	0	0	0	0	0	0	-0.044206	-0.0485075	-0.0400706	-0.0193394	-0.0359128	-0.034661	-0.0305425	-0.037624	-0.0408278	-0.0168468	-0.0141595	-0.0159852	-0.00471538	0.0075146	0.000630545	-0.0014289	-0.014432	-0.0108354	-0.00886684	0.00517215	0
0	0	0	0	0	0	0	0	0	0	0	0	0	0	0	0	0	0	0	0	0	0	0	0	0	0	0	0	0	-0.0277337	-0.0366065	-0.0403411	-0.0206173	-0.0313316	-0.0160167	-0.0321191	-0.0543812	-0.012362	-0.0173994	-0.0153287	0.0017878	0.00479419	0.00441517	-0.00587013	0.000148471	-0.00569296	0.00223939	-0.00384825	-0.00224724	0.00934394
0	0	0	0	0	0	0	0	0	0	0	0	0	0	0	0	0	0	0	0	0	0	0	0	0	0	0	0	0	-0.0319217	-0.0394251	-0.028053	-0.0190276	-0.0255072	-0.0192769	-0.0399109	-0.0608398	-0.00574664	0.00150626	-0.013405	-0.0153483	0.00890944	-0.000988732	0.0077566	0.00297287	-0.00843462	-0.00337634	-0.0010778	-0.00364119	0.00264364
0	0	0	0	0	0	0	0	0	0	0	0	0	0	0	0	0	0	0	0	0	0	0	0	0	0	0	0	0	-0.0204879	-0.0373417	-0.0346941	-0.0206755	-0.0292182	-0.0234262	-0.0335215	-0.0544059	-0.0338632	-0.00543668	-0.0160929	-0.00831912	-0.0212175	0.011342	0.0143695	0.00682532	0.00873135	-0.00760959	-0.00966198	0.00582324	0.00950921
0	0	0	0	0	0	0	0	0	0	0	0	0	0	0	0	0	0	0	0	0	0	0	0	0	0	0	0	0	-0.0295834	-0.0346635	-0.0221077	-0.0192563	-0.0156499	-0.00492449	-0.0176668	-0.0487858	-0.0353981	-0.00212215	-0.0030773	-0.0107943	-0.0035218	0.00245577	-0.00340097	0.0208235	0.0207255	-0.00307682	-0.00789668	0.00144588	0.0235724
0	0	0	0	0	0	0	0	0	0	0	0	0	0	0	0	0	0	0	0	0	0	0	0	0	0	0	0	0	0	-0.0196154	-0.0126856	-0.0105416	-0.015732	0.00617474	-0.0345574	-0.0204009	-0.00137032	-0.0356387	-0.0133672	0.0125237	0.00126139	0.0205764	0.0231005	0.0251934	0.0400533	0.000298874	0.0130576	0.00737432	0.0232328
0	0	0	0	0	0	0	0	0	0	0	0	0	0	0	0	0	0	0	0	0	0	0	0	0	0	0	0	0	0	-0.0253847	-0.0178981	0.00549699	-0.0246346	-0.00851646	-0.0172092	-0.000576268	-0.000802856	-0.022417	-0.00462831	-0.00130857	0.0091087	-0.00134224	0.0192893	0.0297052	0.0431732	0.00883533	0.0104815	0.00603953	0.0196206
0	0	0	0	0	0	0	0	0	0	0	0	0	0	0	0	0	0	0	0	0	0	0	0	0	0	0	0	0	0	0	-0.0283558	0.00671733	-0.0339782	-0.0248255	-0.000138859	-0.00284259	-0.0168818	-0.0135935	0.000573031	0.00891427	0.00633291	-0.0148105	0.00493577	0.0296387	0.028112	0.0237743	0.0247115	0.0167125	0.00891613
0	0	0	0	0	0	0	0	0	0	0	0	0	0	0	0	0	0	0	0	0	0	0	0	0	0	0	0	0	0	0	0	-0.0068638	-0.00512067	-0.0307965	-0.0327824	-0.0195448	-0.00471928	0.00339675	0.00240626	-0.0146105	0.0125634	0.0438493	0.0242081	0.0166548	0.0108425	0.0115094	0.0174622	0.00832183	0.00844672
0	0	0	0	0	0	0	0	0	0	0	0	0	0	0	0	0	0	0	0	0	0	0	0	0	0	0	0	0	0	0	0	0	-0.0112844	-0.0147576	-0.0306242	-0.0329417	-0.00150952	0.01024	0.0121922	-0.0185377	-0.00899195	0.0387929	0.0220239	0.0179613	-0.0127882	0.00796894	0.012599	0.00439409	0.0146144
0	0	0	0	0	0	0	0	0	0	0	0	0	0	0	0	0	0	0	0	0	0	0	0	0	0	0	0	0	0	0	0	0	0	-0.00704578	-0.0180065	-0.0362413	-0.0136421	-0.0101056	-0.000834157	0.0408398	0.0170905	0.0216806	-0.0139218	0.0035487	0.00878094	-0.00476689	-0.0123854	0.0194054	0.00439964
0	0	0	0	0	0	0	0	0	0	0	0	0	0	0	0	0	0	0	0	0	0	0	0	0	0	0	0	0	0	0	0	0	0	0	-0.0206629	-0.0246141	-0.0105873	0.00209886	0.0226425	0.0104538	0.0137847	0.00402116	0.00433426	0.0203031	-0.0105454	-0.00662422	0.00361205	0.0264996	0.0179962
0	0	0	0	0	0	0	0	0	0	0	0	0	0	0	0	0	0	0	0	0	0	0	0	0	0	0	0	0	0	0	0	0	0	0	0	-0.0254123	-0.0185339	0.0132398	0.0103527	0.0104027	0.0368855	0.0152833	0.022856	0.00528114	-0.00597451	-0.00129985	0.0166984	0.019038	0.0121633
0	0	0	0	0	0	0	0	0	0	0	0	0	0	0	0	0	0	0	0	0	0	0	0	0	0	0	0	0	0	0	0	0	0	0	0	0	0	0	-0.017405	0.00634198	0.00576394	0.00069705	0.0234271	-0.0102456	-0.0180058	-0.00584177	0.00368091	0.0140657	0
0	0	0	0	0	0	0	0	0	0	0	0	0	0	0	0	0	0	0	0	0	0	0	0	0	0	0	0	0	0	0	0	0	0	0	0	0	0	0	0	0	0	0	0	0	0	0	0	0	0
0	0	0	0	0	0	0	0	0	0	0	0	0	0	0	0	0	0	0	0	0	0	0	0	0	0	0	0	0	0	0	0	0	0	0	0	0	0	0	0	0	0	0	0	0	0	0	0	0	0
0	0	0	0	0	0	0	0	0	0	0	0	0	0	0	0	0	0	0	0	0	0	0	0	0	0	0	0	0	0	0	0	0	0	0	0	0	0	0	0	0	0	0	0	0	0	0	0	0	0
0	0	0	0	0	0	0	0	0	0	0	0	0	0	0	0	0	0	0	0	0	0	0	0	0	0	0	0	0	0	0	0	0	0	0	0	0	0	0	0	0	0	0	0	0	0	0	0	0	0
0	0	0	0	0	0	0	0	0	0	0	0	0	0	0	0	0	0	0	0	0	0	0	0	0	0	0	0	0	0	0	0	0	0	0	0	0	0	0	0	0	0	0	0	0	0	0	0	0	0
0	0	0	0	0	0	0	0	0	0	0	0	0	0	0	0	0	0	0	0	0	0	0	0	0	0	0	0	0	0	0	0	0	0	0	0	0	0	0	0	0	0	0	0	0	0	0	0	0	0
0	0	0	0	0	0	0	0	0	0	0	0	0	0	0	0	0	0	0	0	0	0	0	0	0	0	0	0	0	0	0	0	0	0	0	0	0	0	0	0	0	0	0	0	0	0	0	0	0	0
0	0	0	0	0	0	0	0	0	0	0	0	0	0	0	0	0	0	0	0	0	0	0	0	0	0	0	0	0	0	0	0	0	0	0	0	0	0	0	0	0	0	0	0	0	0	0	0	0	0
0	0	0	0	0	0	0	0	0	0	0	0	0	0	0	0	0	0	0	0	0	0	0	0	0	0	0	0	0	0	0	0	0	0	0	0	0	0	0	0	0	0	0	0	0	0	0	0	0	0
0	0	0	0	0	0	0	0	0	0	0	0	0	0	0	0	0	0	0	0	0	0	0	0	0	0	0	0	0	0	0	0	0	0	0	0	0	0	0	0	0	0	0	0	0	0	0	0	0	0
0	0	0	0	0	0	0	0	0	0	0	0	0	0	0	0	0	0	0	0	0	0	0	0	0	0	0	0	0	0	0	0	0	0	0	0	0	0	0	0	0	0	0	0	0	0	0	0	0	0
0	0	0	0	0	0	0	0	0	0	0	0	0	0	0	0	0	0	0	0	0	0	0	0	0	0	0	0	0	0	0	0	0	0	0	0	0	0	0	0	0	0	0	0	0	0	0	0	0	0
0	0	0	0	0	0	0	0	0	0	0	0	0	0	0	0	0	0	0	0	0	0	0	0	0	0	0	0	0	0	0	0	0	0	0	0	0	0	0	0	0	0	0	0	0	0	0	0	0	0
0	0	0	0	0	0	0	0	0	0	0	0	0	0	0	0	0	0	0	0	0	0	0	0	0	0	0	0	0	0	0	0	0	0	0	0	0	0	0	0	0	0	0	0	0	0	0	0	0	0
0	0	0	0	0	0	0	0	0	0	0	0	0	0	0	0	0	0	0	0	0	0	0	0	0	0	0	0	0	0	0	0	0	0	0	0	0	0	0	0	0	0	0	0	0	0	0	0	0	0
0	0	0	0	0	0	0	0	0	0	0	0	0	0	0	0	0	0	0	0	0	0	0	0	0	0	0	0	0	0	0	0	0	0	0	0	0	0	0	0	0	0	0	0	0	0	0	0	0	0
0	0	0	0	0	0	0	0	0	0	0	0	0	0	0	0	0	0	0	0	0	0	0	0	0	0	0	0	0	0	0	0	0	0	0	0	0	0	0	0	0	0	0	0	0	0	0	0	0	0
0	0	0	0	0	0	0	0	0	0	0	0	0	0	0	0	0	0	0	0	0	0	0	0	0	0	0	0	0	0	0	0	0	0	0	0	0	0	0	0	0	0	0	0	0	0	0	0	0	0
0	0	0	0	0	0	0	0	0	0	0	0	0	0	0	0	0	0	0	0	0	0	0	0	0	0	0	0	0	0	0	0	0	0	0	0	0	0	0	0	0	0	0	0	0	0	0	0	0	0
0	0	0	0	0	0	0	0	0	0	0	0	0	0	0	0	0	0	0	0	0	0	0	0	0	0	0	0	0	0	0	0	0	0	0	0	0	0	0	0	0	0	0	0	0	0	0	0	0	0
0	0	0	0	0	0	0	0	0	0	0	0	0	0	0	0	0	0	0	0	0	0	0	0	0	0	0	0	0	0	0	0	0	0	0	0	0	0	0	0	0	0	0	0	0	0	0	0	0	0
0	0	0	0	0	0	0	0	0	0	0	0	0	0	0	0	0	0	0	0	0	0	0	0	0	0	0	0	0	0	0	0	0	0	0	0	0	0	0	0	0	0	0	0	0	0	0	0	0	0
0	0	0	0	0	0	0	0	0	0	0	0	0	0	0	0	0	0	0	0	0	0	0	0	0	0	0	0	0	0	0	0	0	0	0	0	0	0	0	0	0	0	0	0	0	0	0	0	0	0
0	0	0	0	0	0	0	0	0	0	0	0	0	0	0	0	0	0	0	0	0	0	0	0	0	0	0	0	0	0	0	0	0	0	0	0	0	0	0	0	0	0	0	0	0	0	0	0	0	0
0	0	0	0	0	0	0	0	0	0	0	0	0	0	0	0	0	0	0	0	0	0	0	0	0	0	0	0	0	0	0	0	0	0	0	0	0	0	0	0	0	0	0	0	0	0	0	0	0	0
0	0	0	0	0	0	0	0	0	0	0	0	0	0	0	0	0	0	0	0	0	0	0	0	0	0	0	0	0	0	0	0	0	0	0	0	0	0	0	0	0	0	0	0	0	0	0	0	0	0
0	0	0	0	0	0	0	0	0	0	0	0	0	0	0	0	0	0	0	0	0	0	0	0	0	0	0	0	0	0	0	0	0	0	0	0	0	0	0	0	0	0	0	0	0	0	0	0	0	0
0	0	0	0	0	0	0	0	0	0	0	0	0	0	0	0	0	0	0	0	0	0	0	0	0	0	0	0	0	0	0	0	0	0	0	0	0	0	0	0	0	0	0	0	0	0	0	0	0	0
0	0	0	0	0	0	0	0	0	0	0	0	0	0	0	0	0	0	0	0	0	0	0	0	0	0	0	0	0	0	0	0	0	0	0	0	0	0	0	0	0	0	0	0	0	0	0	0	0	0
0	0	0	0	0	0	0	0	0	0	0	0	0	0	0	0	0	0	0	0	0	0	0	0	0	0	0	0	0	0	0	0	0	0	0	0	0	0	0	0	0	0	0	0	0	0	0	0	0	0
0	0	0	0	0	0	0	0	0	0	0	0	0	0	0	0	0	0	0	0	0	0	0	0	0	0	0	0	0	0	0	0	0	0	0	0	0	0	0	0	0	0	0	0	0	0	0	0	0	0
0	0	0	0	0	0	0	0	0	0	0	0	0	0	0	0	0	0	0	0	0	0	0	0	0	0	0	0	0	0	0	0	0	0	0	0	0	0	0	0	0	0	0	0	0	0	0	0	0	0
0	0	0	0	0	0	0	0	0	0	0	0	0	0	0	0	0	0	0	0	0	0	0	0	0	0	0	0	0	0	0	0	0	0	0	0	0	0	0	0	0	0	0	0	0	0	0	0	0	0
0	0	0	0	0	0	0	0	0	0	0	0	0	0	0	0	0	0	0	0	0	0	0	0	0	0	0	0	0	0	0	0	0	0	0	0	0	0	0	0	0	0	0	0	0	0	0	0	0	0
0	0	0	0	0	0	0	0	0	0	0	0	0	0	0	0	0	0	0	0	0	0	0	0	0	0	0	0	0	0	0	0	0	0	0	0	0	0	0	0	0	0	0	0	0	0	0	0	0	0
0	0	0	0	0	0	0	0	0	0	0	0	0	0	0	0	0	0	0	0	0	0	0	0	0	0	0	0	0	0	0	0	0	0	0	0	0	0	0	0	0	0	0	0	0	0	0	0	0	0
0	0	0	0	0	0	0	0	0	0	0	0	0	0	0	0	0	0	0	0	0	0	0	0	0	0	0	0	0	-0.0794351	-0.0528621	-0.0467959	-0.0356454	-0.0352136	-0.0127766	0.00718159	-0.00754125	0.0126883	0.0309943	0	0	0	0	0	0	0	0	0	0	0
0	0	0	0	0	0	0	0	0	0	0	0	0	0	0	0	0	0	0	0	0	0	0	0	0	0	0	0	-0.0502661	-0.0264899	-0.0252954	-0.0242576	-0.0125134	-0.0174441	0.00529038	0.0116859	0.018764	0.0557828	0.0422375	0.0260632	0.0128782	0	0	0	0	0	0	0	0	0
0	0	0	0	0	0	0	0	0	0	0	0	0	0	0	0	0	0	0	0	0	0	0	0	0	0	-0.0549364	-0.00662355	0.00670755	0.014183	-0.00955232	-0.00883029	0.0216288	0.0227927	0.0247385	0.0127505	0.0544556	0.0605814	0.0236207	0.0264378	0.0150584	0.0042172	0	0	0	0	0	0	0	0
0	0	0	0	0	0	0	0	0	0	0	0	0	0	0	0	0	0	0	0	0	0	0	0	0	-0.0344811	0.00212775	0.0105508	0.00460577	0.0368022	0.0414927	0.0347251	0.0391095	0.0410212	0.0373205	0.0479531	0.0303085	0.0162654	0.0391401	0.0211546	-0.00450468	0.00423651	0.00954694	0	0	0	0	0	0	0
0	0	0	0	0	0	0	0	0	0	0	0	0	0	0	0	0	0	0	0	0	0	0	0	0	-0.0151491	-0.0223298	0.00651764	0.0301309	0.0299641	0.021884	0.0262477	0.0331829	0.02494	0.0440838	0.0326774	0.043296	0.0294666	0.00254525	-0.00212985	0.00803249	0.0228463	0.0248923	0.00415827	0	0	0	0	0	0
0	0	0	0	0	0	0	0	0	0	0	0	0	0	0	0	0	0	0	0	0	0	0	0	-0.0287684	-0.0204336	-0.00556655	-0.00114776	0.017366	0.0301884	0.0247912	0.0469435	0.0387536	0.0203315	0.0516731	0.0362242	0.0452023	0.0265601	0.0146939	0.0108739	0.0161145	0.0218137	0.0227914	0.0119095	-0.000569122	0	0	0	0	0
0	0	0	0	0	0	0	0	0	0	0	0	0	0	0	0	0	0	0	0	0	0	0	0	-0.0360614	-0.0269404	-0.00401426	-0.00659066	0.0117494	0.0283038	0.0315407	0.0287411	0.0323665	0.0352446	0.0341912	0.0314192	0.0245	0.0157186	0.00713305	-0.0137981	0.0157112	0.0342059	0.0197686	0.00606128	-0.00186036	0	0	0	0	0
0	0	0	0	0	0	0	0	0	0	0	0	0	0	0	0	0	0	0	0	0	0	0	-0.0486188	-0.0360496	0.0045082	0.0194706	0.000385981	0.0043357	0.0306339	0.0321163	0.0281691	0.028048	0.0333537	0.0343875	0.0177537	0.0161256	0.00784597	0.013577	0.0126443	0.00362935	0.0155024	0.00583265	-0.000853689	-0.00183655	-0.000430624	0	0	0	0
0	0	0	0	0	0	0	0	0	0	0	0	0	0	0	0	0	0	0	0	0	0	0	-0.0334453	-0.0350535	-0.0198581	-0.0228447	-0.00898866	-0.015406	0.00768624	0.0221392	0.00864228	0.021081	0.0137076	0.025865	0.00637504	0.0128918	0.00186037	0.00349609	-0.00179688	-0.00429869	0.00108163	0.00276391	0.00221867	0.000906052	-0.00165789	0	0	0	0
0	0	0	0	0	0	0	0	0	0	0	0	0	0	0	0	0	0	0	0	0	0	-0.0270073	-0.0296206	-0.0315349	-0.0282042	-0.0204787	-0.042845	-0.0286474	-0.00745075	-0.00102945	-0.0170026	-0.0201753	-0.0105465	-0.00423054	-0.00642405	-0.00165793	0.00844835	0.00256239	0.000461005	-0.00501057	0.000815183	-0.0052333	-0.00884344	-0.00747326	-0.00829869	0	0	0	0
0	0	0	0	0	0	0	0	0	0	0	0	0	0	0	0	0	0	0	0	0	0	-0.0176139	-0.0123168	-0.0297692	-0.0315665	-0.029236	-0.027301	-0.0225738	0.0149155	-0.00110865	-0.0233022	-0.0382488	-0.00410687	0.00945783	-0.00167197	-0.00246731	0.00684322	0.0103419	0.0052963	0.00249597	0.00098901	-0.000821047	0.000130442	-0.000812364	-0.00179504	0	0	0	0
0	0	0	0	0	0	0	0	0	0	0	0	0	0	0	0	0	0	0	0	0	0	-0.0352848	-0.0130707	-0.00800051	-0.0224492	-0.0246078	-0.0276798	-0.0299427	-0.0235518	-0.0264027	-0.014571	-0.00754147	-0.0135855	0.00279797	0.00422889	-0.00766878	-0.0165174	-0.0108161	-0.00281866	-0.00243084	0.00383393	-0.00159112	-0.00711099	-0.00492006	-0.00958835	0	0	0	0
0	0	0	0	0	0	0	0	0	0	0	0	0	0	0	0	0	0	0	0	0	0	-0.024223	-0.0207451	-0.0136921	-0.0202245	-0.0121889	-0.0278533	-0.0151243	-0.0116172	-0.0160096	-0.0228197	-0.00478982	-0.011837	0.00388688	-0.00748113	-0.0179942	-0.0142543	-0.0108968	-0.0154232	-0.0144398	-0.0086979	0.00315858	-0.0045443	-0.00146176	0	0	0	0	0
0	0	0	0	0	0	0	0	0	0	0	0	0	0	0	0	0	0	0	0	0	0	-0.031262	-0.0197854	-0.0179882	-0.0168657	-0.0149312	-0.0273788	-0.0259135	-0.010565	-0.0259069	-0.020215	-0.0119705	-0.0125575	-0.00757507	-0.0236856	-0.0251658	-0.0150214	-0.0157855	-0.00919034	-0.0147649	-0.0126027	-0.00467758	-0.00440289	-0.00624124	0	0	0	0	0
0	0	0	0	0	0	0	0	0	0	0	0	0	0	0	0	0	0	0	0	0	0	-0.0341135	-0.0287153	-0.0175059	-0.0185089	-0.0168127	-0.0285149	-0.020741	-0.0086358	-0.0248337	-0.0199751	-0.0103134	-0.0189463	-0.0191472	-0.0199358	-0.0242812	-0.0167148	-0.0197773	-0.0157161	-0.0179617	-0.0149933	-0.00365426	-0.009251	0	0	0	0	0	0
0	0	0	0	0	0	0	0	0	0	0	0	0	0	0	0	0	0	0	0	0	0	-0.0344477	-0.0287678	-0.0188668	-0.017219	-0.020146	-0.025302	-0.0163169	-0.0134138	-0.0194613	-0.0195183	-0.00599137	-0.0198391	-0.0167604	-0.0224901	-0.0266231	-0.0174865	-0.0162492	-0.0196053	-0.0186988	-0.0187054	-0.0064379	-0.00495346	0	0	0	0	0	0
0	0	0	0	0	0	0	0	0	0	0	0	0	0	0	0	0	0	0	0	0	0	-0.0394482	-0.0242612	-0.0243351	-0.0226665	-0.0154002	-0.0236637	-0.0172514	-0.00752092	-0.0177482	-0.0181812	-0.0116161	-0.0205233	-0.0170369	-0.0224331	-0.0228026	-0.0231489	-0.0171226	-0.00943153	-0.0220808	-0.0155827	-0.000751712	0	0	0	0	0	0	0
0	0	0	0	0	0	0	0	0	0	0	0	0	0	0	0	0	0	0	0	0	0	0	0	-0.0307727	-0.0302662	-0.0233945	-0.0283679	-0.0260652	-0.0143339	-0.025716	-0.0279393	-0.00979726	-0.0296585	-0.0288402	-0.0287505	-0.0265535	-0.0162657	-0.0167107	-0.0174673	-0.0197421	0	0	0	0	0	0	0	0	0
0	0	0	0	0	0	0	0	0	0	0	0	0	0	0	0	0	0	0	0	0	0	0	0	0	0	0	0	-0.0302152	-0.0324591	-0.0403971	-0.0318618	-0.0177467	-0.0308367	-0.0259952	-0.0242281	-0.02842	0	0	0	0	0	0	0	0	0	0	0	0	0
0	0	0	0	0	0	0	0	0	0	0	0	0	0	0	0	0	0	0	0	0	0	0	0	0	0	0	0	0	0	0	0	0	0	0	0	0	0	0	0	0	0	0	0	0	0	0	0	0	0
0	0	0	0	0	0	0	0	0	0	0	0	0	0	0	0	0	0	0	0	0	0	0	0	0	0	0	0	0	0	0	0	0	0	0	0	0	0	0	0	0	0	0	0	0	0	0	0	0	0
0	0	0	0	0	0	0	0	0	0	0	0	0	0	0	0	0	0	0	0	0	0	0	0	0	0	0	0	0	0	0	0	0	0	0	0	0	0	0	0	0	0	0	0	0	0	0	0	0	0
0	0	0	0	0	0	0	0	0	0	0	0	0	0	0	0	0	0	0	0	0	0	0	0	0	0	0	0	0	0	0	0	0	0	0	0	0	0	0	0	0	0	0	0	0	0	0	0	0	0
0	0	0	0	0	0	0	0	0	0	0	0	0	0	0	0	0	0	0	0	0	0	0	0	0	0	0	0	0	0	0	0	0	0	0	0	0	0	0	0	0	0	0	0	0	0	0	0	0	0
0	0	0	0	0	0	0	0	0	0	0	0	0	0	0	0	0	0	0	0	0	0	0	0	0	0	0	0	0	0	0	0	0	0	0	0	0	0	0	0	0	0	0	0	0	0	0	0	0	0
0	0	0	0	0	0	0	0	0	0	0	0	0	0	0	0	0	0	0	0	0	0	0	0	0	0	0	0	0	0	0	0	0	0	0	0	0	0	0	0	0	0	0	0	0	0	0	0	0	0
0	0	0	0	0	0	0	0	0	0	0	0	0	0	0	0	0	0	0	0	0	0	0	0	0	0	0	0	0	0	0	0	0	0	0	0	0	0	0	0	0	0	0	0	0	0	0	0	0	0
0	0	0	0	0	0	0	0	0	0	0	0	0	0	0	0	0	0	0	0	0	0	0	0	0	0	0	0	0	0	0	0	0	0	0	0	0	0	0	0	0	0	0	0	0	0	0	0	0	0
0	0	0	0	0	0	0	0	0	0	0	0	0	0	0	0	0	0	0	0	0	0	0	0	0	0	0	0	0	0	0	0	0	0	0	0	0	0	0	0	0	0	0	0	0	0	0	0	0	0
0	0	0	0	0	0	0	0	0	0	0	0	0	0	0	0	0	0	0	0	0	0	0	0	0	0	0	0	0	0	0	0	0	0	0	0	0	0	0	0	0	0	0	0	0	0	0	0	0	0
0	0	0	0	0	0	0	0	0	0	0	0	0	0	0	0	0	0	0	0	0	0	0	0	0	0	0	0	0	0	0	0	0	0	0	0	0	0	0	0	0	0	0	0	0	0	0	0	0	0
0	0	0	0	0	0	0	0	0	0	0	0	0	0	0	0	0	0	0	0	0	0	0	0	0	0	0	0	0	0	0	0	0	0	0	0	0	0	0	0	0	0	0	0	0	0	0	0	0	0
0	0	0	0	0	0	0	0	0	0	0	0	0	0	0	0	0	0	0	0	0	0	0	0	0	0	0	0	0	0	0	0	0	0	0	0	0	0	0	0	0	0	0	0	0	0	0	0	0	0
0	0	0	0	0	0	0	0	0	0	0	0	0	0	0	0	0	0	0	0	0	0	0	0	0	0	0	0	0	0	0	0	0	0	0	0	0	0	0	0	0	0	0	0	0	0	0	0	0	0
0	0	0	0	0	0	0	0	0	0	0	0	0	0	0	0	0	0	0	0	0	0	0	0	0	0	0	0	0	0	0	0	0	0	0	0	0	0	0	0	0	0	0	0	0	0	0	0	0	0
0	0	0	0	0	0	0	0	0	0	0	0	0	0	0	0	0	0	0	0	0	0	0	0	0	0	0	0	0	0	0	0	0	0	0	0	0	0	0	0	0	0	0	0	0	0	0	0	0	0
0	0	0	0	0	0	0	0	0	0	0	0	0	0	0	0	0	0	0	0	0	0	0	0	0	0	0	0	0	0	0	0	0	0	0	0	0	0	0	0	0	0	0	0	0	0	0	0	0	0
0	0	0	0	0	0	0	0	0	0	0	0	0	0	0	0	0	0	0	0	0	0	0	0	0	0	0	0	0	0	0	0	0	0	0	0	0	0	0	0	0	0	0	0	0	0	0	0	0	0
0	0	0	0	0	0	0	0	0	0	0	0	0	0	0	0	0	0	0	0	0	0	0	0	0	0	0	0	0	0	0	0	0	0	0	0	0	0	0	0	0	0	0	0	0	0	0	0	0	0
0	0	0	0	0	0	0	0	0	0	0	0	0	0	0	0	0	0	0	0	0	0	0	0	0	0	0	0	0	0	0	0	0	0	0	0	0	0	0	0	0	0	0	0	0	0	0	0	0	0
0	0	0	0	0	0	0	0	0	0	0	0	0	0	0	0	0	0	0	0	0	0	0	0	0	0	0	0	0	0	0	0	0	0	0	0	0	0	0	0	0	0	0	0	0	0	0	0	0	0
0	0	0	0	0	0	0	0	0	0	0	0	0	0	0	0	0	0	0	0	0	0	0	0	0	0	0	0	0	0	0	0	0	0	0	0	0	0	0	0	0	0	0	0	0	0	0	0	0	0
0	0	0	0	0	0	0	0	0	0	0	0	0	0	0	0	0	0	0	0	0	0	0	0	0	0	0	0	0	0	0	0	0	0	0	0	0	0	0	0	0	0	0	0	0	0	0	0	0	0
0	0	0	0	0	0	0	0	0	0	0	0	0	0	0	0	0	0	0	0	0	0	0	0	0	0	0	0	0	0	0	0	0	0	0	0	0	0	0	0	0	0	0	0	0	0	0	0	0	0
0	0	0	0	0	0	0	0	0	0	0	0	0	0	0	0	0	0	0	0	0	0	0	0	0	0	0	0	0	0	0	0	0	0	0	0	0	0	0	0	0	0	0	0	0	0	0	0	0	0
0	0	0	0	0	0	0	0	0	0	0	0	0	0	0	0	0	0	0	0	0	0	0	0	0	0	0	0	0	0	0	0	0	0	0	0	0	0	0	0	0	0	0	0	0	0	0	0	0	0
0	0	0	0	0	0	0	0	0	0	0	0	0	0	0	0	0	0	0	0	0	0	0	0	0	0	0	0	0	0	0	0	0	0	0	0	0	0	0	0	0	0	0	0	0	0	0	0	0	0
0	0	0	0	0	0	0	0	0	0	0	0	0	0	0	0	0	0	0	0	0	0	0	0	0	0	0	0	0	0	0	0	0	0	0	0	0	0	0	0	0	0	0	0	0	0	0	0	0	0
0	0	0	0	0	0	0	0	0	0	0	0	0	0	0	0	0	0	-0.0484682	-0.0347037	-0.0292229	-0.0301282	-0.0256689	-0.0268196	-0.0227371	-0.0224296	0	0	0	0	0	0	0	0	0	0	0	0	0	0	0	0	0	0	0	0	0	0	0	0
0	0	0	0	0	0	0	0	0	0	0	0	0	0	0	0	0	-0.0499823	-0.0270455	-0.0269608	-0.0290453	-0.0227266	-0.0272595	-0.0315883	-0.0251207	-0.0185557	-0.0180314	-0.013631	0	0	0	0	0	0	0	0	0	0	0	0	0	0	0	0	0	0	0	0	0	0
0	0	0	0	0	0	0	0	0	0	0	0	0	0	0	0	-0.0499134	-0.0351396	-0.020093	-0.0218361	-0.0233768	-0.0302501	-0.0320039	-0.0309622	-0.0299823	-0.050295	-0.0650957	-0.0268202	-0.0290473	-0.0122386	0.00666748	0	0	0	0	0	0	0	0	0	0	0	0	0	0	0	0	0	0	0
0	0	0	0	0	0	0	0	0	0	0	0	0	0	0	-0.097883	-0.0221156	-0.0201933	-0.03074	-0.0319945	-0.0357234	-0.0366203	-0.040622	-0.0366813	-0.0351633	-0.0349003	-0.0287536	-0.0285321	4.15991e-05	0.0504147	0.0703915	0.0483709	0.0103575	0	0	0	0	0	0	0	0	0	0	0	0	0	0	0	0	0
0	0	0	0	0	0	0	0	0	0	0	0	0	0	-0.0241851	-0.0195694	-0.0232465	-0.029063	-0.0289159	-0.022935	-0.0127083	-0.0144851	-0.0140523	-0.0118186	-0.00522869	-0.0104411	-0.0106056	-0.00846194	-0.00616627	0.0162164	-0.00675935	-0.0039261	0.00553811	-0.00378225	-0.00914322	0	0	0	0	0	0	0	0	0	0	0	0	0	0	0
0	0	0	0	0	0	0	0	0	0	0	0	0	-0.0424109	-0.026633	-0.0251725	-0.0246358	-0.0190209	-0.0193733	-0.0236106	-0.0213373	-0.0147907	-0.0116123	-0.0127933	-0.0130246	-0.00810405	-0.00839707	-0.0114389	-0.00459892	0.000428922	-0.00396098	-0.01423	0.000935466	-0.00422059	-0.00693746	-0.0112871	-0.00740737	-0.0159546	-0.00938227	-0.00570418	-0.00517096	0.0154803	0	0	0	0	0	0	0	0
0	0	0	0	0	0	0	0	0	0	0	0	0	-0.0391435	-0.0270453	-0.0247607	-0.0333819	-0.0247359	-0.0152645	-0.0147748	-0.0247131	-0.020091	-0.012276	-0.0171197	-0.0103926	-0.015186	-0.00292526	-0.0140627	-0.00957273	-0.00590988	-0.00618158	-0.0100991	0.00350878	-0.00824727	-0.0134739	-0.0130212	-0.0159158	-0.0137937	-0.00709672	-0.00451694	-0.0115502	0.01233	0.0185712	0	0	0	0	0	0	0
0	0	0	0	0	0	0	0	0	0	0	0	0	-0.0323132	-0.0194235	-0.0268891	-0.0277664	-0.0262606	-0.0114056	-0.0106691	-0.00574242	-0.0164114	-0.0122985	-0.00582018	-0.00175427	-0.00455147	-0.00090376	-0.0106668	-0.0100018	0.00321284	-0.0040523	-0.0027879	0.0126696	-0.00593663	-0.009944	0.000403323	-0.00758381	-0.00976935	-0.00647163	0.00346614	-0.000228388	0.013287	0.0191781	0	0	0	0	0	0	0
0	0	0	0	0	0	0	0	0	0	0	0	0	-0.0334943	-0.018647	-0.0179066	-0.0240274	-0.0203719	-0.0164731	-0.0128207	-0.00619463	0.000428263	-0.00373527	-0.0197646	-0.00565242	-0.000139096	0.00664384	-0.00447383	-0.0112465	0.00693508	-0.00893682	-0.0138269	0.00927861	-0.0108031	-0.00827453	-0.0146933	-0.0155745	-0.00625714	-0.00888852	-0.00859901	0.00566003	0.0145626	0.0101006	0.00849247	0	0	0	0	0	0
0	0	0	0	0	0	0	0	0	0	0	0	0	-0.035883	-0.0231037	-0.021266	-0.0215979	-0.0151696	-0.0134836	-0.00858633	-0.0138929	-0.0095544	-0.00318106	-0.0121517	-0.00905163	0.00534495	0.00678261	-0.00668342	-0.00332499	0.00537962	0.000898842	-0.00313564	0.00528841	-0.0142718	-0.00663753	-0.0106175	-0.00751619	0.00175414	-0.00355194	-0.00585984	0.0168949	0.0175544	0.0024705	-0.0018669	0.0122125	-0.0117865	-0.0434393	-0.0581362	-0.0378015	-0.0301073
0	0	0	0	0	0	0	0	0	0	0	0	0	-0.0248696	-0.0170914	-0.0217197	-0.0181422	-0.0135719	-0.0104205	-0.00975971	-0.00958622	-0.00646564	-0.0161549	-0.0109645	0.0025766	0.000837924	-0.00425485	0.00517048	0.00456602	0.0127966	0.00649287	0.00537534	0.0207596	0.00729827	-0.00281488	0.00153094	-0.0018401	0.0134237	0.0335311	0.00571344	0.0289429	0.0181688	0.00163668	0.0110188	-0.0388854	0	0	0	0	0
0	0	0	0	0	0	0	0	0	0	0	0	0	-0.0304621	-0.0199017	-0.013611	-0.0248354	-0.0190226	-0.00811323	-0.0131385	-0.0144252	-0.00641194	-0.0094724	-0.0140534	-0.00176688	0.00255214	0.000829953	-0.00651373	-0.00115165	0.0124475	0.00586628	0.00640147	0.023382	0.0163799	0.0324842	0.0359927	0.0330005	0.032869	0.0235285	0.0168857	-0.00651322	0.0164861	0.00236817	-0.0115446	0	0	0	0	0	0
0	0	0	0	0	0	0	0	0	0	0	0	0	-0.0332837	-0.0169144	-0.0145984	-0.0155354	-0.0164773	-0.0131321	-0.00785268	-0.00925276	-0.00046036	-0.0020042	-0.00920962	-0.00526071	-0.0011895	0.00214234	-0.00449873	0.0148442	0.012189	0.00669221	0.0146044	0.0252155	0.0280971	0.0286271	0.0204639	0.00628002	0.0105354	0.0240347	0.0188792	0.0161166	0.00485339	-0.00899733	-0.0336012	0	0	0	0	0	0
0	0	0	0	0	0	0	0	0	0	0	0	0	0	-0.0264664	-0.0167531	-0.020381	-0.014835	-0.0123533	-0.00454125	-0.00716702	-0.00762699	-0.00561495	-0.023668	-0.0151614	-0.00528497	-0.00107578	0.000230119	-0.00272437	0.0205676	0.00675794	-0.00100382	0.00594658	0.0241432	0.0228315	0.00922124	0.0124491	0.0199897	0.0056394	0.0128898	0.0227496	-0.00722366	-0.0114339	-0.00232489	0	0	0	0	0	0
0	0	0	0	0	0	0	0	0	0	0	0	0	0	0	-0.0338329	-0.022949	-0.0205952	-0.0186687	-0.0139371	-0.0123508	-0.0116937	-0.00985309	-0.0198915	-0.018929	-0.0078294	0.00390423	-0.0101041	-0.0021926	0.00748339	-0.00867391	0.00855884	0.0328315	0.0174569	0.0321294	0.0342974	0.0232898	0.0138195	-0.00581327	-0.0247327	0.0101372	0.0125611	-0.018811	-0.0337695	0	0	0	0	0	0
0	0	0	0	0	0	0	0	0	0	0	0	0	0	0	0	0	-0.0154745	-0.0136224	-0.0156838	-0.0117864	-0.00935841	-0.0107021	-0.0150675	-0.0107422	-0.00540196	-0.00450464	-0.00757687	0.0019268	0.0153136	-0.00116398	0.00443154	0.0215262	0.0261843	0.0323813	0.0455727	0.0276647	0.0281171	-0.0101323	-0.023381	0.0316304	-0.00149031	0	0	0	0	0	0	0	0
0	0	0	0	0	0	0	0	0	0	0	0	0	0	0	0	0	0	0	0	-0.0315086	-0.0234559	-0.0235119	-0.0329336	-0.0209358	-0.0186767	-0.0155752	-0.0192902	-0.0180924	-0.00334443	-0.006715	-0.0131621	-0.0105926	-0.011269	0.0425177	0.0202997	0.0101855	0.0110955	0	0	0	0	0	0	0	0	0	0	0	0
0	0	0	0	0	0	0	0	0	0	0	0	0	0	0	0	0	0	0	0	0	0	0	0	0	0	0	0	0	0	0	0	0	0	0	0	0	0	0	0	0	0	0	0	0	0	0	0	0	0
0	0	0	0	0	0	0	0	0	0	0	0	0	0	0	0	0	0	0	0	0	0	0	0	0	0	0	0	0	0	0	0	0	0	0	0	0	0	0	0	0	0	0	0	0	0	0	0	0	0
0	0	0	0	0	0	0	0	0	0	0	0	0	0	0	0	0	0	0	0	0	0	0	0	0	0	0	0	0	0	0	0	0	0	0	0	0	0	0	0	0	0	0	0	0	0	0	0	0	0
0	0	0	0	0	0	0	0	0	0	0	0	0	0	0	0	0	0	0	0	0	0	0	0	0	0	0	0	0	0	0	0	0	0	0	0	0	0	0	0	0	0	0	0	0	0	0	0	0	0
0	0	0	0	0	0	0	0	0	0	0	0	0	0	0	0	0	0	0	0	0	0	0	0	0	0	0	0	0	0	0	0	0	0	0	0	0	0	0	0	0	0	0	0	0	0	0	0	0	0
0	0	0	0	0	0	0	0	0	0	0	0	0	0	0	0	0	0	0	0	0	0	0	0	0	0	0	0	0	0	0	0	0	0	0	0	0	0	0	0	0	0	0	0	0	0	0	0	0	0
0	0	0	0	0	0	0	0	0	0	0	0	0	0	0	0	0	0	0	0	0	0	0	0	0	0	0	0	0	0	0	0	0	0	0	0	0	0	0	0	0	0	0	0	0	0	0	0	0	0
0	0	0	0	0	0	0	0	0	0	0	0	0	0	0	0	0	0	0	0	0	0	0	0	0	0	0	0	0	0	0	0	0	0	0	0	0	0	0	0	0	0	0	0	0	0	0	0	0	0
0	0	0	0	0	0	0	0	0	0	0	0	0	0	0	0	0	0	0	0	0	0	0	0	0	0	0	0	0	0	0	0	0	0	0	0	0	0	0	0	0	0	0	0	0	0	0	0	0	0
0	0	0	0	0	0	0	0	0	0	0	0	0	0	0	0	0	0	0	0	0	0	0	0	0	0	0	0	0	0	0	0	0	0	0	0	0	0	0	0	0	0	0	0	0	0	0	0	0	0
0	0	0	0	0	0	0	0	0	0	0	0	0	0	0	0	0	0	0	0	0	0	0	0	0	0	0	0	0	0	0	0	0	0	0	0	0	0	0	0	0	0	0	0	0	0	0	0	0	0
0	0	0	0	0	0	0	0	0	0	0	0	0	0	0	0	0	0	0	0	0	0	0	0	0	0	0	0	0	0	0	0	0	0	0	0	0	0	0	0	0	0	0	0	0	0	0	0	0	0
0	0	0	0	0	0	0	0	0	0	0	0	0	0	0	0	0	0	0	0	0	0	0	0	0	0	0	0	0	0	0	0	0	0	0	0	0	0	0	0	0	0	0	0	0	0	0	0	0	0
0	0	0	0	0	0	0	0	0	0	0	0	0	0	0	0	0	0	0	0	0	0	0	0	0	0	0	0	0	0	0	0	0	0	0	0	0	0	0	0	0	0	0	0	0	0	0	0	0	0
0	0	0	0	0	0	0	0	0	0	0	0	0	0	0	0	0	0	0	0	0	0	0	0	0	0	0	0	0	0	0	0	0	0	0	0	0	0	0	0	0	0	0	0	0	0	0	0	0	0
0	0	0	0	0	0	0	0	0	0	0	0	0	0	0	0	0	0	0	0	0	0	0	0	0	0	0	0	0	0	0	0	0	0	0	0	0	0	0	0	0	0	0	0	0	0	0	0	0	0
0	0	0	0	0	0	0	0	0	0	0	0	0	0	0	0	0	0	0	0	0	0	0	0	0	0	0	0	0	0	0	0	0	0	0	0	0	0	0	0	0	0	0	0	0	0	0	0	0	0
0	0	0	0	0	0	0	0	0	0	0	0	0	0	0	0	0	0	0	0	0	0	0	0	0	0	0	0	0	0	0	0	0	0	0	0	0	0	0	0	0	0	0	0	0	0	0	0	0	0
0	0	0	0	0	0	0	0	0	0	0	0	0	0	0	0	0	0	0	0	0	0	0	0	0	0	0	0	0	0	0	0	0	0	0	0	0	0	0	0	0	0	0	0	0	0	0	0	0	0
0	0	0	0	0	0	0	0	0	0	0	0	0	0	0	0	0	0	0	0	0	0	0	0	0	0	0	0	0	0	0	0	0	0	0	0	0	0	0	0	0	0	0	0	0	0	0	0	0	0
0	0	0	0	0	0	0	0	0	0	0	0	0	0	0	0	0	0	0	0	0	0	0	0	0	0	0	0	0	0	0	0	0	0	0	0	-0.109299	-0.0690726	0	0	0	0	0	0	0	0	0	0	0	0
0	0	0	0	0	0	0	0	0	0	0	0	0	0	0	0	0	0	0	0	0	0	0	0	0	0	0	0	0	0	0	0	0	0	0	-0.0688293	-0.0748275	-0.054976	-0.0429413	-0.0221362	0	0	0	0	0	0	0	0	0	0
0	0	0	0	0	0	0	0	0	0	0	0	0	0	0	0	0	0	0	0	0	0	0	0	0	0	0	0	0	0	0	0	0	0	-0.0684863	-0.00620817	0.00234609	0.00482813	-0.0125045	-0.00513865	0.0244428	0	0	0	0	0	0	0	0	0
0	0	0	0	0	0	0	0	0	0	0	0	0	0	0	0	0	0	0	0	0	0	0	0	0	0	0	0	0	0	0	0	0	-0.0357938	0.00586649	0.0265211	0.00647972	0.0120238	0.00975031	0.0283696	0.0508304	0.0225706	-0.00933495	0.0264055	0	0	0	0	0	0
0	0	0	0	0	0	0	0	0	0	0	0	0	0	0	0	0	0	0	0	0	0	0	0	0	0	0	0	0	0	0	-0.0473137	0.0295983	0.0330845	0.0186892	0.0284421	0.019126	-0.00858473	-0.00906349	0.0249796	0.0550583	0.0397433	0.0256739	0.033874	0.0378912	0.0149075	0	0	0	0
0	0	0	0	0	0	0	0	0	0	0	0	0	0	0	0	0	0	0	0	0	0	0	0	0	0	0	0	0	0	-0.0369059	0.00239202	0.0120476	0.00720094	0.0278497	0.0279823	0.0263975	0.0273451	0.0168939	0.0380827	0.0680314	0.0229459	-0.0229255	0.050128	0.0429338	0.0103322	0.00383215	0	0	0
0	0	0	0	0	0	0	0	0	0	0	0	0	0	0	0	0	0	0	0	0	0	0	0	0	0	0	0	0	-0.0407474	-0.00856052	0.0226093	0.0138228	0.019595	0.0390318	0.0516783	0.0213878	0.0318318	0.0325874	0.0418756	0.0616923	0.0405883	0.0105983	0.0299587	0.0309243	0.00270215	0.00135119	-0.00616826	0	0
0	0	0	0	0	0	0	0	0	0	0	0	0	0	0	0	0	0	0	0	0	0	0	0	0	0	0	0	0	-0.00314029	-0.0136104	0.0190004	0.0240125	0.0165348	0.0298885	0.01916	0.016201	0.0431888	0.057472	0.0551688	0.0665184	0.0335986	-0.00170866	0.026403	0.0234448	0.00319518	-0.00115812	-0.00225487	0	0
0	0	0	0	0	0	0	0	0	0	0	0	0	0	0	0	0	0	0	0	0	0	0	0	0	0	0	0	-0.0333286	0.0127482	-0.00833908	-0.00486278	0.00854332	0.0247128	0.0378593	0.0282991	0.024305	0.0525902	0.0654374	0.0614787	0.0571602	0.00684508	0.00913303	0.0374978	0.0195287	0.00013735	0.000110796	-0.00523845	0	0
0	0	0	0	0	0	0	0	0	0	0	0	0	0	0	0	0	0	0	0	0	0	0	0	0	0	0	-0.0343773	-0.00469858	-0.00748259	-0.00888353	-0.00840983	0.0211174	0.0117819	0.024363	0.0513473	0.0412687	0.0461006	0.056727	0.0401251	0.0237783	-0.00459242	-0.00222622	0.0143795	0.0104458	-0.00501915	0.000326497	-0.00812014	0	0
0	0	0	0	0	0	0	0	0	0	0	0	0	0	0	0	0	0	0	0	0	0	0	0	0	0	-0.0331277	-0.0215024	-0.0174977	0.00436506	-0.00875655	-0.0156774	0.00707043	-0.00396248	0.00388536	0.0282822	0.041265	-0.00428959	0.00824469	0.0331942	0.0129718	-0.00842174	0.002872	0.010503	0.0129403	-0.00150273	-0.00394128	-0.00246472	0	0
0	0	0	0	0	0	0	0	0	0	0	0	0	0	0	0	0	0	0	0	0	0	0	0	0	0	-0.0238326	-0.0194976	-0.0147477	-0.000455721	-0.00591561	0.00142814	-0.00552344	-0.0133493	-0.00344472	0.00953741	0.0167341	0.0083229	4.25816e-06	0.00414705	0.00971432	-0.00468579	-0.00640729	0.00295414	0.00502854	-0.00735927	-0.00803302	-0.0063303	0	0
0	0	0	0	0	0	0	0	0	0	0	0	0	0	0	0	0	0	0	0	0	0	0	0	0	-0.0368131	-0.0173682	-0.0212996	-0.0226367	0.00136757	-0.00439233	-0.0177818	-0.0132362	-0.0149273	-0.0154464	-0.0135865	-0.00861639	-0.00392247	0.0055722	0.011562	0.0107093	-0.00148607	-0.00549574	-0.00122099	-0.00218166	-0.00444348	-0.00212232	-0.00577588	0	0
0	0	0	0	0	0	0	0	0	0	0	0	0	0	0	0	0	0	0	0	0	0	0	0	0	-0.0438963	-0.00957591	-0.00885326	-0.0237519	-0.00948934	-0.0105659	-0.0231535	-0.00120188	-0.00918849	-0.0286452	-0.0100689	-0.0134903	-0.00225311	0.00863829	0.00474867	0.00920328	-0.00146521	-0.00831321	0.00100972	0.00459413	-0.0033698	-0.00672905	-0.00980549	0	0
0	0	0	0	0	0	0	0	0	0	0	0	0	0	0	0	0	0	0	0	0	0	0	0	0	-0.043572	-0.013012	-0.0106477	-0.0211166	-0.0119271	-0.0109518	-0.0117365	0.00383743	-0.0120704	-0.0318347	-0.0168151	-0.00630992	-0.00408035	0.00292012	0.00559365	-0.0018113	-0.0043512	-0.0010602	-0.00970922	-0.000699979	-0.00399628	0.000892151	-0.00839936	0	0
0	0	0	0	0	0	0	0	0	0	0	0	0	0	0	0	0	0	0	0	0	0	0	0	0	-0.028904	-0.0147098	-0.0156769	-0.0216201	-0.0163566	-0.0127764	-0.0263545	-0.00514143	-0.00857411	-0.0167573	-0.00417946	-0.00904154	-0.00867498	0.0029928	0.00720333	-0.0079945	-0.00257468	-0.00784395	-0.0161775	-0.00324428	-0.00814826	-0.0155846	-0.0124958	0	0
0	0	0	0	0	0	0	0	0	0	0	0	0	0	0	0	0	0	0	0	0	0	0	0	-0.0329698	-0.0255728	-0.0219799	-0.02215	-0.0196218	-0.0201409	-0.0228348	-0.0134564	-0.00354704	-0.0133	-0.0178665	-0.0138618	-0.00941419	-0.00796224	-0.00593791	-0.0140271	-0.0109442	-0.00374918	-0.00315456	-0.00398609	-0.0116252	-0.0145467	-0.0169024	-0.020509	0	0
0	0	0	0	0	0	0	0	0	0	0	0	0	0	0	0	0	0	0	0	0	0	0	0	-0.0231827	-0.0217832	-0.0146981	-0.0284382	-0.0141379	-0.01256	-0.0249845	-0.0220955	-0.0056207	-0.0214915	-0.0143966	-0.0123998	-0.0194065	-0.0140721	-0.0174374	-0.0146993	-0.00174773	-0.0091002	-0.014428	-0.0138309	-0.0140496	-0.00898565	-0.012599	0	0	0
0	0	0	0	0	0	0	0	0	0	0	0	0	0	0	0	0	0	0	0	0	0	0	0	-0.0287181	-0.0243634	-0.0218616	-0.0349431	-0.0292001	-0.0173186	-0.0252462	-0.0304886	-0.0167417	-0.0272827	-0.0241799	-0.0293796	-0.0285198	-0.0237147	-0.0204881	-0.0225052	-0.010951	-0.00752956	-0.0164065	-0.0130222	-0.0114664	-0.0131424	-0.0166371	0	0	0
0	0	0	0	0	0	0	0	0	0	0	0	0	0	0	0	0	0	0	0	0	0	0	0	0	-0.0227459	-0.0201513	-0.0310133	-0.0298746	-0.0202776	-0.0336052	-0.0298966	-0.0184417	-0.0253509	-0.0265639	-0.027396	-0.0251385	-0.025713	-0.0264447	-0.0220245	-0.0186345	-0.00414669	-0.00851107	-0.0159871	-0.0135707	-0.0155851	0	0	0	0
0	0	0	0	0	0	0	0	0	0	0	0	0	0	0	0	0	0	0	0	0	0	0	0	0	-0.0372164	-0.032139	-0.0390641	-0.0360561	-0.0301237	-0.0339318	-0.0377892	-0.0224285	-0.0338486	-0.0263364	-0.0369126	-0.039213	-0.0347637	-0.0315699	-0.0258516	-0.0301304	-0.011043	-0.0145047	-0.0257537	-0.0214415	-0.0236641	0	0	0	0
0	0	0	0	0	0	0	0	0	0	0	0	0	0	0	0	0	0	0	0	0	0	0	0	0	0	0	-0.0390758	-0.0389336	-0.0319008	-0.033894	-0.0348717	-0.0272646	-0.0446012	-0.0379545	-0.041636	-0.0458705	-0.0482743	-0.0492909	-0.0325974	-0.0272744	-0.0116775	-0.0140637	-0.0205858	-0.0261109	0	0	0	0	0
0	0	0	0	0	0	0	0	0	0	0	0	0	0	0	0	0	0	0	0	0	0	0	0	0	0	0	0	0	-0.0305764	-0.0377707	-0.0423458	-0.0358049	-0.0416185	-0.0533868	-0.0468525	-0.044829	-0.0282552	-0.0300014	-0.0279051	-0.0273175	-0.0128852	0	0	0	0	0	0	0	0
0	0	0	0	0	0	0	0	0	0	0	0	0	0	0	0	0	0	0	0	0	0	0	0	0	0	0	0	0	0	0	-0.0396542	-0.0212969	-0.0435284	-0.0396514	-0.04276	-0.0374935	-0.0294193	-0.0285614	0	0	0	0	0	0	0	0	0	0	0
0	0	0	0	0	0	0	0	0	0	0	0	0	0	0	0	0	0	0	0	0	0	0	0	0	0	0	0	0	0	0	0	0	0	0	0	0	0	0	0	0	0	0	0	0	0	0	0	0	0
0	0	0	0	0	0	0	0	0	0	0	0	0	0	0	0	0	0	0	0	0	0	0	0	0	0	0	0	0	0	0	0	0	0	0	0	0	0	0	0	0	0	0	0	0	0	0	0	0	0
0	0	0	0	0	0	0	0	0	0	0	0	0	0	0	0	0	0	0	0	0	0	0	0	0	0	0	0	0	0	0	0	0	0	0	0	0	0	0	0	0	0	0	0	0	0	0	0	0	0
0	0	0	0	0	0	0	0	0	0	0	0	0	0	0	0	0	0	0	0	0	0	0	0	0	0	0	0	0	0	0	0	0	0	0	0	0	0	0	0	0	0	0	0	0	0	0	0	0	0
0	0	0	0	0	0	0	0	0	0	0	0	0	0	0	0	0	0	0	0	0	0	0	0	0	0	0	0	0	0	0	0	0	0	0	0	0	0	0	0	0	0	0	0	0	0	0	0	0	0
0	0	0	0	0	0	0	0	0	0	0	0	0	0	0	0	0	0	0	0	0	0	0	0	0	0	0	0	0	0	0	0	0	0	0	0	0	0	0	0	0	0	0	0	0	0	0	0	0	0
0	0	0	0	0	0	0	0	0	0	0	0	0	0	0	0	0	0	0	0	0	0	0	0	0	0	0	0	0	0	0	0	0	0	0	0	0	0	0	0	0	0	0	0	0	0	0	0	0	0
0	0	0	0	0	0	0	0	0	0	0	0	0	0	0	0	0	0	0	0	0	0	0	0	0	0	0	0	0	0	0	0	0	0	0	0	0	0	0	0	0	0	0	0	0	0	0	0	0	0
0	0	0	0	0	0	0	0	0	0	0	0	0	0	0	0	0	0	0	0	0	0	0	0	0	0	0	0	0	0	0	0	0	0	0	0	0	0	0	0	0	0	0	0	0	0	0	0	0	0
0	0	0	0	0	0	0	0	0	0	0	0	0	0	0	0	0	0	0	0	0	0	0	0	0	0	0	0	0	0	0	0	0	0	0	0	0	0	0	0	0	0	0	0	0	0	0	0	0	0
0	0	0	0	0	0	0	0	0	0	0	0	0	0	0	0	0	0	0	0	0	0	0	0	0	0	0	0	0	0	0	0	0	0	0	0	0	0	0	0	0	0	0	0	0	0	0	0	0	0
0	0	0	0	0	0	0	0	0	0	0	0	0	0	0	0	0	0	0	0	0	0	0	0	0	0	0	0	0	0	0	0	0	0	0	0	0	0	0	0	0	0	0	0	0	0	0	0	0	0
0	0	0	0	0	0	0	0	0	0	0	0	0	0	0	0	0	0	0	0	0	0	0	0	0	0	0	0	0	0	0	0	0	0	0	0	0	0	0	0	0	0	0	0	0	0	0	0	0	0
0	0	0	0	0	0	0	0	0	0	0	0	0	0	0	0	0	0	0	0	0	0	0	0	0	0	0	0	0	0	0	0	0	0	0	0	0	0	0	0	0	0	0	0	0	0	0	0	0	0
0	0	0	0	0	0	0	0	0	0	0	0	0	0	0	0	0	0	0	0	0	0	0	0	0	0	0	0	0	0	0	0	0	0	0	0	0	0	0	0	0	0	0	0	0	0	0	0	0	0
0	0	0	0	0	0	0	0	0	0	0	0	0	0	0	0	0	0	0	0	0	0	0	0	0	0	0	0	0	0	0	0	0	0	0	0	0	0	0	0	0	0	0	0	0	0	0	0	0	0
0	0	0	0	0	0	0	0	0	0	0	0	0	0	0	0	0	0	0	0	0	0	0	0	0	0	0	0	0	0	0	0	0	0	0	0	0	0	0	0	0	0	0	0	0	0	0	0	0	0
0	0	0	0	0	0	0	0	0	0	0	0	0	0	0	0	0	0	0	0	0	0	0	0	0	0	0	0	0	0	0	0	0	0	0	0	0	0	0	0	0	0	0	0	0	0	0	0	0	0
0	0	0	0	0	0	0	0	0	0	0	0	0	0	0	0	0	0	0	0	0	0	0	0	0	0	0	0	0	0	0	0	0	0	0	0	0	0	0	0	0	0	0	0	0	0	0	0	0	0
0	0	0	0	0	0	0	0	0	0	0	0	0	0	0	0	0	0	0	0	0	0	0	0	0	0	0	0	0	0	0	0	0	0	0	0	0	0	0	0	0	0	0	0	0	0	0	0	0	0
0	0	0	0	0	0	0	0	0	0	0	0	0	0	0	0	0	0	0	0	0	0	0	0	0	0	0	0	0	0	0	0	0	0	0	0	0	0	0	0	0	0	0	0	0	0	0	0	0	0
0	0	0	0	0	0	0	0	0	0	0	0	0	0	0	0	0	0	0	0	0	0	0	0	0	0	0	0	0	0	0	0	0	0	0	0	0	0	0	0	0	0	0	0	0	0	0	0	0	0
0	0	0	0	0	0	0	0	0	0	0	0	0	0	0	0	0	0	0	0	0	0	0	0	0	0	0	-0.0291835	-0.0256581	0.00192698	0.00330972	0.00902703	0.0252001	-0.0198081	0	0	0	0	0	0	0	0	0	0	0	0	0	0	0	0
0	0	0	0	0	0	0	0	0	0	0	0	0	0	0	0	0	0	0	0	0	0	0	0.0591948	-0.209118	-0.278552	-0.169215	-0.119889	0.00937315	0.0807346	0.0850421	0.00697564	0.045629	0.151449	0.186476	0.217149	0.0677678	0	0	0	0	0	0	0	0	0	0	0	0	0
0	0	0	0	0	0	0	0	0	0	0	0	0	0	0	0	0	0	0	0	0	-0.0239935	-0.0128349	-0.0376248	-0.027593	-0.00105479	0.00463698	0.00485268	0.00199534	0.0116282	0.0330012	0.025171	0.0159046	-0.0251957	-0.0078542	0.00748451	-0.0178913	0.0661605	0.0158579	0	0	0	0	0	0	0	0	0	0	0
0	0	0	0	0	0	0	0	0	0	0	0	0	0	0	0	0	-0.0265552	-0.0196919	-0.02421	-0.0220278	-0.0180095	-0.0272977	-0.0343281	-0.00283081	0.000871422	0.00959656	0.00644496	-0.00555355	0.00779822	0.00188136	0.0188123	0.00430572	-0.0114568	0.020164	0.0282056	-0.00212135	0.0746296	0	0	0	0	0	0	0	0	0	0	0	0
0	0	0	0	0	0	0	0	0	0	0	0	0	0	0	0	0	-0.0222867	-0.0220768	-0.0154508	-0.0124738	-0.0186755	-0.0270875	-0.0209663	-0.0122987	-0.00705265	0.0214437	0.0123976	-0.0130036	-0.00354445	0.0108768	0.0650016	0.0162677	0.00253596	0.0571824	0.0189356	0.0133105	0.0772254	0	0	0	0	0	0	0	0	0	0	0	0
0	0	0	0	0	0	0	0	0	0	0	0	0	0	0	0	-0.0326038	-0.0206817	-0.0179312	-0.0203357	-0.0239499	-0.0205411	-0.0243949	-0.0288032	-0.026285	-0.00653669	0.022545	-0.0197391	-0.031815	0.0113983	0.0110133	0.0510969	0.0236103	-0.000798585	0.0565445	0.0285507	0.011553	0.0571869	0	0	0	0	0	0	0	0	0	0	0	0
0	0	0	0	0	0	0	0	0	0	0	0	0	0	0	0	-0.0300719	-0.0294654	-0.0348388	-0.0307619	-0.034545	-0.026723	-0.0132433	-0.0399212	-0.0275062	0.0136197	-0.00880745	-0.0516573	0.000147137	0.00748299	-0.00243995	0.0318049	0.0253442	0.0330343	0.0395489	0.00433197	0.0105413	0.0515733	0	0	0	0	0	0	0	0	0	0	0	0
0	0	0	0	0	0	0	0	0	0	0	0	0	0	0	0	-0.0307613	-0.03908	-0.0342868	-0.0335957	-0.0255343	-0.0160592	-0.0218548	-0.0304565	-0.0140107	-0.000651796	-0.0460565	-0.0204583	-0.00635697	-0.0341764	0.017435	0.0296216	0.0303824	0.0422933	0.0497058	-0.00392801	0.0286865	0.0403506	0	0	0	0	0	0	0	0	0	0	0	0
0	0	0	0	0	0	0	0	0	0	0	0	0	0	0	0	-0.0405213	-0.0266384	-0.0293683	-0.0215585	-0.0135433	-0.00692088	-0.0347515	-0.0262405	-0.0201468	-0.0258005	-0.0106213	-0.0197912	-0.0428391	0.0143779	0.0452518	0.0109079	0.0215451	0.0209955	0.0325534	0.00419573	0.0292726	-0.00393076	0	0	0	0	0	0	0	0	0	0	0	0
0	0	0	0	0	0	0	0	0	0	0	0	0	0	0	-0.0392885	-0.0390609	-0.0313912	-0.0331602	-0.0317002	-0.0194043	-0.0159659	-0.0357954	-0.0242567	-0.0337774	-0.0141602	-0.00256422	-0.0345811	-0.0161333	0.0293492	0.0287571	-0.0081211	0.0156571	0.0353364	0.0244484	0.0160677	0.0181017	0	0	0	0	0	0	0	0	0	0	0	0	0
0	0	0	0	0	0	0	0	0	0	0	0	0	0	0	-0.0430959	-0.0432703	-0.0413443	-0.0335885	-0.0287068	-0.0212464	-0.0311072	-0.038469	-0.0102238	-0.0265487	0.000197966	0.010335	-0.0330442	-0.00611929	0.0252124	0.0164157	-0.0272443	0.0157258	0.0405069	0.0212828	0.0111229	0	0	0	0	0	0	0	0	0	0	0	0	0	0
0	0	0	0	0	0	0	0	0	0	0	0	0	0	0	0	-0.0297111	-0.032821	-0.0314644	-0.0204504	-0.0136584	-0.0392941	-0.0705378	-0.0305201	0.00159832	-0.00491123	0.00848163	-0.00376627	0.00914964	0.0238408	-0.030218	-0.021691	0.0592274	0.0422628	0.0146996	0	0	0	0	0	0	0	0	0	0	0	0	0	0	0
0	0	0	0	0	0	0	0	0	0	0	0	0	0	0	0	0	-0.0456582	-0.0192798	-0.0181609	-0.00890708	-0.0149869	-0.0234922	-0.0330029	-0.0338103	-0.0204097	-0.0159781	-0.0158115	-0.00507848	0.00210222	-0.00556597	0.0060568	0.00115823	-0.013403	0	0	0	0	0	0	0	0	0	0	0	0	0	0	0	0
0	0	0	0	0	0	0	0	0	0	0	0	0	0	0	0	0	0	-0.042833	-0.0254451	-0.0204732	-0.0162948	-0.0197149	-0.0365131	-0.0286611	-0.0310876	-0.016747	-0.0200769	-0.0263935	-0.00893383	-0.0116464	-0.00772283	-0.0134271	0	0	0	0	0	0	0	0	0	0	0	0	0	0	0	0	0
0	0	0	0	0	0	0	0	0	0	0	0	0	0	0	0	0	0	0	-0.0328018	-0.0227351	-0.0219437	-0.0210731	-0.0373688	-0.0346521	-0.0306512	-0.01344	-0.0253782	-0.022335	-0.0181428	-0.0185932	-0.0176758	0	0	0	0	0	0	0	0	0	0	0	0	0	0	0	0	0	0
0	0	0	0	0	0	0	0	0	0	0	0	0	0	0	0	0	0	0	0	-0.0323552	-0.0287403	-0.0299127	-0.0318702	-0.0378686	-0.0246112	-0.0230394	-0.0235066	-0.0240417	-0.0114427	-0.013518	0	0	0	0	0	0	0	0	0	0	0	0	0	0	0	0	0	0	0
0	0	0	0	0	0	0	0	0	0	0	0	0	0	0	0	0	0	0	0	0	0	0	-0.0297214	-0.0251059	-0.0299794	-0.0213221	-0.032776	-0.0219949	0	0	0	0	0	0	0	0	0	0	0	0	0	0	0	0	0	0	0	0	0
0	0	0	0	0	0	0	0	0	0	0	0	0	0	0	0	0	0	0	0	0	0	0	0	0	0	0	0	0	0	0	0	0	0	0	0	0	0	0	0	0	0	0	0	0	0	0	0	0	0
0	0	0	0	0	0	0	0	0	0	0	0	0	0	0	0	0	0	0	0	0	0	0	0	0	0	0	0	0	0	0	0	0	0	0	0	0	0	0	0	0	0	0	0	0	0	0	0	0	0
0	0	0	0	0	0	0	0	0	0	0	0	0	0	0	0	0	0	0	0	0	0	0	0	0	0	0	0	0	0	0	0	0	0	0	0	0	0	0	0	0	0	0	0	0	0	0	0	0	0
0	0	0	0	0	0	0	0	0	0	0	0	0	0	0	0	0	0	0	0	0	0	0	0	0	0	0	0	0	0	0	0	0	0	0	0	0	0	0	0	0	0	0	0	0	0	0	0	0	0
0	0	0	0	0	0	0	0	0	0	0	0	0	0	0	0	0	0	0	0	0	0	0	0	0	0	0	0	0	0	0	0	0	0	0	0	0	0	0	0	0	0	0	0	0	0	0	0	0	0
0	0	0	0	0	0	0	0	0	0	0	0	0	0	0	0	0	0	0	0	0	0	0	0	0	0	0	0	0	0	0	0	0	0	0	0	0	0	0	0	0	0	0	0	0	0	0	0	0	0
0	0	0	0	0	0	0	0	0	0	0	0	0	0	0	0	0	0	0	0	0	0	0	0	0	0	0	0	0	0	0	0	0	0	0	0	0	0	0	0	0	0	0	0	0	0	0	0	0	0
0	0	0	0	0	0	0	0	0	0	0	0	0	0	0	0	0	0	0	0	0	0	0	0	0	0	0	0	0	0	0	0	0	0	0	0	0	0	0	0	0	0	0	0	0	0	0	0	0	0
0	0	0	0	0	0	0	0	0	0	0	0	0	0	0	0	0	0	0	0	0	0	0	0	0	0	0	0	0	0	0	0	0	0	0	0	0	0	0	0	0	0	0	0	0	0	0	0	0	0
0	0	0	0	0	0	0	0	0	0	0	0	0	0	0	0	0	0	0	0	0	0	0	0	0	0	0	0	0	0	0	0	0	0	0	0	0	0	0	0	0	0	0	0	0	0	0	0	0	0
0	0	0	0	0	0	0	0	0	0	0	0	0	0	0	0	0	0	0	0	0	0	0	0	0	0	0	0	0	0	0	0	0	0	0	0	0	0	0	0	0	0	0	0	0	0	0	0	0	0
0	0	0	0	0	0	0	0	0	0	0	0	0	0	0	0	0	0	0	0	0	0	0	0	0	0	0	0	0	0	0	0	0	0	0	0	0	0	0	0	0	0	0	0	0	0	0	0	0	0
0	0	0	0	0	0	0	0	0	0	0	0	0	0	0	0	0	0	0	0	0	0	0	0	0	0	0	0	0	0	0	0	0	0	0	0	0	0	0	0	0	0	0	0	0	0	0	0	0	0
0	0	0	0	0	0	0	0	0	0	0	0	0	0	0	0	0	0	0	0	0	0	0	0	0	0	0	0	0	0	0	0	0	0	0	0	0	0	0	0	0	0	0	0	0	0	0	0	0	0
0	0	0	0	0	0	0	0	0	0	0	0	0	0	0	0	0	0	0	0	0	0	0	0	0	0	0	0	0	0	0	0	0	0	0	0	0	0	0	0	0	0	0	0	0	0	0	0	0	0
0	0	0	0	0	0	0	0	0	0	0	0	0	0	0	0	0	0	0	0	0	0	0	0	0	0	0	0	0	0	0	0	0	0	0	0	0	0	0	0	0	0	0	0	0	0	0	0	0	0
0	0	0	0	0	0	0	0	0	0	0	0	0	0	0	0	0	0	0	0	0	0	0	0	0	0	0	0	0	0	0	0	0	0	0	0	0	0	0	0	0	0	0	0	0	0	0	0	0	0
0	0	0	0	0	0	0	0	0	0	0	0	0	0	0	0	0	0	0	0	0	0	0	0	0	0	0	0	0	0	0	0	0	0	0	0	0	0	0	0	0	0	0	0	0	0	0	0	0	0
0	0	0	0	0	0	0	0	0	0	0	0	0	0	0	0	0	0	0	0	0	0	0	0	0	0	0	0	0	0	0	0	0	0	0	0	0	0	0	0	0	0	0	0	0	0	0	0	0	0
0	0	0	0	0	0	0	0	0	0	0	0	0	0	0	0	0	0	0	0	0	0	0	0	0	0	0	0	0	0	0	0	0	0	0	0	0	0	0	0	0	0	0	0	0	0	0	0	0	0
0	0	0	0	0	0	0	0	0	0	0	0	0	0	0	0	0	0	0	0	0	0	0	0	0	0	0	0	0	0	0	0	0	0	0	0	0	0	0	0	0	0	0	0	0	0	0	0	0	0
0	0	0	0	0	0	0	0	0	0	0	0	0	0	0	0	0	0	0	0	0	0	0	0	0	0	0	0	0	0	0	0	0	0	0	0	0	0	0	0	0	0	0	0	0	0	0	0	0	0
0	0	0	0	0	0	0	0	0	0	0	0	0	0	0	0	0	0	0	0	0	0	0	0	0	0	0	0	0	0	0	0	0	0	0	0	0	0	0	0	0	0	0	0	0	0	0	0	0	0
0	0	0	0	0	0	0	0	0	0	0	0	0	0	0	0	0	0	0	0	0	0	0	0	0	0	0	0	0	0	0	0	0	0	0	0	0	0	0	0	0	0	0	0	0	0	0	0	0	0
0	0	0	0	0	0	0	0	0	0	0	0	0	0	0	0	0	0	0	0	0	0	0	0	0	0	0	0	0	0	0	0	0	0	0	0	0	0	0	0	0	0	0	0	0	0	0	0	0	0
0	0	0	0	0	0	0	0	0	0	0	0	0	0	0	0	0	0	0	0	0	0	0	0	0	0	0	0	0	0	0	0	0	0	0	0	0	0	0	0	0	0	0	0	0	0	0	0	0	0
0	0	0	0	0	0	0	0	0	0	0	0	0	0	0	0	0	0	0	0	0	0	0	0	0	0	0	0	0	0	0	0	0	0	0	0	0	0	0	0	0	0	0	0	0	0	0	0	0	0
0	0	0	0	0	0	0	0	0	0	0	0	0	0	0	0	0	0	0	0	0	0	0	0	0	0	0	0	0	0	0	0	0	0	0	0	0	0	0	0	0	0	0	0	0	0	0	0	0	0
0	0	0	0	0	0	0	0	0	0	0	0	0	0	0	0	0	0	0	0	0	0	0	0	0	0	0	0	0	0	0	0	0	0	0	0	0	0	0	0	0	0	0	0	0	0	0	0	0	0
0	0	0	0	0	0	0	0	0	0	0	0	0	0	0	0	0	0	0	0	0	0	0	0	0	0	0	0	0	0	0	0	0	0	0	0	0	0	0	0	0	0	0	0	0	0	0	0	0	0
0	0	0	0	0	0	0	0	0	0	0	0	0	0	0	0	0	0	0	0	0	0	0	0	0	0	0	0	0	0	0	0	0	0	0	0	0	0	0	0	0	0	0	0	0	0	0	0	0	0
0	0	0	0	0	0	0	0	0	0	0	0	0	0	0	0	0	0	0	0	0	0	0	0	0	0	0	0	0	0	0	0	0	0	0	0	0	0	0	0	0	0	0	0	0	0	0	0	0	0
0	0	0	0	0	0	0	0	0	0	0	0	0	0	0	0	0	0	0	0	0	0	0	0	0	0	0	-0.0353537	0.0413995	0.0789167	-0.0415672	0	0	0	0	0	0	0	0	0	0	0	0	0	0	0	0	0	0	0
0	0	0	0	0	0	0	0	0	0	0	0	0	0	0	0	0	0	0	0	0	0	0	0	-0.00822028	0.0142738	0.01403	0.00229379	-0.00330273	0.0291459	-0.0476166	0	0	0	0	0	0	0	0	0	0	0	0	0	0	0	0	0	0	0
0	0	0	0	0	0	0	0	0	0	0	0	0	0	0	0	0	0	0	-0.021749	-0.011904	0.00247274	0.0251164	0.0287728	0.0223985	0.0137245	0.0149135	0.00456572	0.0133111	0.0392787	-0.0364809	0	0	0	0	0	0	0	0	0	0	0	0	0	0	0	0	0	0	0
0	0	0	0	0	0	0	0	0	0	0	0	0	0	0	0	0	-0.0357802	-0.0230362	0.0118995	0.0149784	0.0232698	0.0155719	-0.00258436	0.030199	0.0442294	0.0247383	0.00997193	0.00407298	0.0340486	-0.00368561	0	0	0	0	0	0	0	0	0	0	0	0	0	0	0	0	0	0	0
0	0	0	0	0	0	0	0	0	0	0	0	0	0	0	0	-0.0586076	-0.0247012	0.00651095	0.0380373	0.0359314	0.0329074	0.00844143	0.00697784	-0.00335309	0.0420494	0.0527319	0.0228031	0.00961315	0.0282618	0.00448819	-0.0238697	0	0	0	0	0	0	0	0	0	0	0	0	0	0	0	0	0	0
0	0	0	0	0	0	0	0	0	0	0	0	0	0	0	0	-0.0420873	-0.010602	0.023445	0.031266	0.0264524	0.0206619	0.00668845	3.16021e-05	0.00275708	0.0394755	0.063151	0.0251057	0.0161558	0.0405377	0.00996617	-0.0177614	0	0	0	0	0	0	0	0	0	0	0	0	0	0	0	0	0	0
0	0	0	0	0	0	0	0	0	0	0	0	0	0	0	-0.0624036	-0.0395797	0.00525622	0.0334135	0.0430636	0.0339465	0.0277562	0.0216111	0.0103257	0.0282324	0.0421985	0.068919	0.0244011	0.0168344	0.0400203	0.00659501	-0.0245036	0	0	0	0	0	0	0	0	0	0	0	0	0	0	0	0	0	0
0	0	0	0	0	0	0	0	0	0	0	0	0	0	0	-0.0323226	-0.016253	0.000212818	0.02815	0.0416952	0.0336615	0.0239371	0.0304846	0.0292059	0.0522126	0.0622046	0.0561538	0.00841415	0.0235757	0.0490541	0.00964062	-0.0204199	0	0	0	0	0	0	0	0	0	0	0	0	0	0	0	0	0	0
0	0	0	0	0	0	0	0	0	0	0	0	0	0	-0.0474064	-0.0156226	-0.00140171	0.0116112	0.0234889	0.00775436	0.00468465	0.0409339	0.0365743	0.0368913	0.0703473	0.0397022	0.0243671	0.0156962	0.0519112	0.0556672	0.0161541	-0.0311897	0	0	0	0	0	0	0	0	0	0	0	0	0	0	0	0	0	0
0	0	0	0	0	0	0	0	0	0	0	0	0	-0.1471	-0.0847151	0.0159264	-0.0398534	-0.0983598	-0.0713553	-0.0178471	0.0225036	-0.032693	-0.00459127	0.0279053	0.0619631	0.027826	-0.066733	0.0212758	0.0682109	0.0366732	-0.0078947	-0.0231363	0	0	0	0	0	0	0	0	0	0	0	0	0	0	0	0	0	0
0	0	0	0	0	0	0	0	0	0	0	0	0.00628008	-0.0677823	-0.0260041	0.01958	-0.0382437	-0.0644542	-0.0190609	0.00120418	0.0118994	0.0190779	0.038587	0.0292541	0.0608718	-0.050599	-0.0313555	0.0560442	0.0426914	0.0260634	-0.00532107	-0.0224586	0	0	0	0	0	0	0	0	0	0	0	0	0	0	0	0	0	0
0	0	0	0	0	0	0	0	0	0	0	-0.0209199	-0.0125108	-0.025981	-0.0256294	-0.00962612	-0.0273667	-0.0513421	-0.0122026	0.0202289	0.0224113	0.027918	0.0383198	0.0404022	-0.0145095	-0.00614347	0.0186855	0.00301922	0.0169687	0.0219999	0.00139981	-0.0119279	0	0	0	0	0	0	0	0	0	0	0	0	0	0	0	0	0	0
0	0	0	0	0	0	0	0	0	0	0	-0.0178165	-0.0121858	-0.0148345	-0.0265583	-0.0184302	-0.0195936	-0.0409179	-0.0138574	-0.00228657	0.000419747	0.0143243	0.0309327	0.0320103	-0.0199434	-0.00301299	0.0220112	0.000681285	0.0115744	0.0181581	-0.00098369	-0.014331	0	0	0	0	0	0	0	0	0	0	0	0	0	0	0	0	0	0
0	0	0	0	0	0	0	0	0	0	0	-0.0164839	-0.00467059	-0.00686338	-0.0413284	-0.0399726	-0.0168151	-0.0270118	0.00267774	0.00741938	0.0133057	0.0235307	0.0407746	0.000651561	-0.0142925	-0.00234023	0.0136961	0.00287108	0.0201271	0.0128264	-0.00160796	-0.0123848	0	0	0	0	0	0	0	0	0	0	0	0	0	0	0	0	0	0
0	0	0	0	0	0	0	0	0	0	0	-0.0165413	-0.00140152	-0.0262636	-0.0463473	-0.0974833	-0.0156827	-0.00330239	0.018785	0.0257211	0.0203695	0.0287455	0.0357663	-0.0215039	-0.00745899	-0.00332646	-0.00414633	0.00427967	0.0126017	0.0138623	-0.00832083	-0.0164275	0	0	0	0	0	0	0	0	0	0	0	0	0	0	0	0	0	0
0	0	0	0	0	0	0	0	0	0	0	-0.023113	-0.0167285	-0.0329046	-0.0442651	-0.057637	-0.0296267	0.00836793	0.0293779	0.0191308	0.0214873	0.0214251	-0.00917396	-0.00907986	0.00538156	0.00167775	0.00537755	3.18553e-05	0.00157875	-5.00331e-05	-0.0171896	-0.0170684	0	0	0	0	0	0	0	0	0	0	0	0	0	0	0	0	0	0
0	0	0	0	0	0	0	0	0	0	0	-0.0587975	-0.0376742	-0.0265154	-0.011231	-0.0640118	-0.146313	-0.153162	-0.120819	-0.0652506	-0.0236308	-0.0264527	-0.0209778	-0.0224653	-0.00313843	-0.0102182	-0.00498978	-0.0143684	0.00064482	0.00382794	-0.00143244	-0.0133857	0	0	0	0	0	0	0	0	0	0	0	0	0	0	0	0	0	0
0	0	0	0	0	0	0	0	0	0	0	-0.0510702	-0.0456389	-0.0355761	-0.0272465	-0.0256303	-0.0254556	-0.0188868	-0.0177726	-0.0252287	-0.0215882	-0.0221109	-0.017478	-0.0176674	-0.0161131	-0.022409	-0.0117102	-0.0172299	-0.0214522	-0.00869505	-0.0129756	0	0	0	0	0	0	0	0	0	0	0	0	0	0	0	0	0	0	0
0	0	0	0	0	0	0	0	0	0	0	0	-0.0403743	-0.0279504	-0.0275024	-0.0126167	-0.0123577	-0.0195122	-0.0192467	-0.0262209	-0.0266371	-0.0249318	-0.0195158	-0.0127196	-0.0156683	-0.0177288	-0.0170345	-0.014098	-0.0127809	-0.00382591	0	0	0	0	0	0	0	0	0	0	0	0	0	0	0	0	0	0	0	0
0	0	0	0	0	0	0	0	0	0	0	0	-0.0384224	-0.0180483	-0.0367934	-0.0201252	-0.0055254	-0.0184088	-0.0234195	-0.0333869	-0.02962	-0.0377455	-0.0338829	-0.0133566	-0.0200466	-0.0171116	-0.00984597	-0.0154215	-0.0143532	-0.00515314	0	0	0	0	0	0	0	0	0	0	0	0	0	0	0	0	0	0	0	0
0	0	0	0	0	0	0	0	0	0	0	0	-0.0427998	-0.0120313	-0.0207283	-0.0268448	-0.0195813	-0.00965682	-0.0180499	-0.0402013	-0.0433087	-0.038332	-0.0221478	-0.00467753	-0.00799275	-0.00884838	-0.00998175	-0.0165757	-0.014402	0	0	0	0	0	0	0	0	0	0	0	0	0	0	0	0	0	0	0	0	0
0	0	0	0	0	0	0	0	0	0	0	0	0	0	-0.00979313	-0.0230095	-0.0128196	-0.00156481	-0.000180857	-0.0366909	-0.0251285	-0.00696628	-0.00050574	0.0015963	-0.00992481	-0.0127628	-0.0130244	0	0	0	0	0	0	0	0	0	0	0	0	0	0	0	0	0	0	0	0	0	0	0
0	0	0	0	0	0	0	0	0	0	0	0	0	0	0	0	0	-0.0224857	-0.0120524	-0.00638449	-0.00913156	-0.0109936	-0.00782868	-0.00723909	0	0	0	0	0	0	0	0	0	0	0	0	0	0	0	0	0	0	0	0	0	0	0	0	0	0
0	0	0	0	0	0	0	0	0	0	0	0	0	0	0	0	0	0	0	0	0	0	0	0	0	0	0	0	0	0	0	0	0	0	0	0	0	0	0	0	0	0	0	0	0	0	0	0	0	0
0	0	0	0	0	0	0	0	0	0	0	0	0	0	0	0	0	0	0	0	0	0	0	0	0	0	0	0	0	0	0	0	0	0	0	0	0	0	0	0	0	0	0	0	0	0	0	0	0	0
0	0	0	0	0	0	0	0	0	0	0	0	0	0	0	0	0	0	0	0	0	0	0	0	0	0	0	0	0	0	0	0	0	0	0	0	0	0	0	0	0	0	0	0	0	0	0	0	0	0
0	0	0	0	0	0	0	0	0	0	0	0	0	0	0	0	0	0	0	0	0	0	0	0	0	0	0	0	0	0	0	0	0	0	0	0	0	0	0	0	0	0	0	0	0	0	0	0	0	0
0	0	0	0	0	0	0	0	0	0	0	0	0	0	0	0	0	0	0	0	0	0	0	0	0	0	0	0	0	0	0	0	0	0	0	0	0	0	0	0	0	0	0	0	0	0	0	0	0	0
0	0	0	0	0	0	0	0	0	0	0	0	0	0	0	0	0	0	0	0	0	0	0	0	0	0	0	0	0	0	0	0	0	0	0	0	0	0	0	0	0	0	0	0	0	0	0	0	0	0
0	0	0	0	0	0	0	0	0	0	0	0	0	0	0	0	0	0	0	0	0	0	0	0	0	0	0	0	0	0	0	0	0	0	0	0	0	0	0	0	0	0	0	0	0	0	0	0	0	0
0	0	0	0	0	0	0	0	0	0	0	0	0	0	0	0	0	0	0	0	0	0	0	0	0	0	0	0	0	0	0	0	0	0	0	0	0	0	0	0	0	0	0	0	0	0	0	0	0	0
0	0	0	0	0	0	0	0	0	0	0	0	0	0	0	0	0	0	0	0	0	0	0	0	0	0	0	0	0	0	0	0	0	0	0	0	0	0	0	0	0	0	0	0	0	0	0	0	0	0
0	0	0	0	0	0	0	0	0	0	0	0	0	0	0	0	0	0	0	0	0	0	0	0	0	0	0	0	0	0	0	0	0	0	0	0	0	0	0	0	0	0	0	0	0	0	0	0	0	0
0	0	0	0	0	0	0	0	0	0	0	0	0	0	0	0	0	0	0	0	0	0	0	0	0	0	0	0	0	0	0	0	0	0	0	0	0	0	0	0	0	0	0	0	0	0	0	0	0	0
0	0	0	0	0	0	0	0	0	0	0	0	0	0	0	0	0	0	0	0	0	0	0	0	0	0	0	0	0	0	0	0	0	0	0	0	0	0	0	0	0	0	0	0	0	0	0	0	0	0
0	0	0	0	0	0	0	0	0	0	0	0	0	0	0	0	0	0	0	0	0	0	0	0	0	0	0	0	0	0	0	0	0	0	0	0	0	0	0	0	0	0	0	0	0	0	0	0	0	0
0	0	0	0	0	0	0	0	0	0	0	0	0	0	0	0	0	0	0	0	0	0	0	0	0	0	0	0	0	0	0	0	0	0	0	0	0	0	0	0	0	0	0	0	0	0	0	0	0	0
0	0	0	0	0	0	0	0	0	0	0	0	0	0	0	0	0	0	0	0	0	0	0	0	0	0	0	0	0	0	0	0	0	0	0	0	0	0	0	0	0	0	0	0	0	0	0	0	0	0
0	0	0	0	0	0	0	0	0	0	0	0	0	0	0	0	0	0	0	0	0	0	0	0	0	0	0	0	0	0	0	0	0	0	0	0	0	0	0	0	0	0	0	0	0	0	0	0	0	0
0	0	0	0	0	0	0	0	0	0	0	0	0	0	0	0	0	0	0	0	0	0	0	0	0	0	0	0	0	0	0	0	0	0	0	0	0	0	0	0	0	0	0	0	0	0	0	0	0	0
0	0	0	0	0	0	0	0	0	0	0	0	0	0	0	0	0	0	0	0	0	0	0	0	0	0	0	0	0	0	0	0	0	0	0	0	0	0	0	0	0	0	0	0	0	0	0	0	0	0
0	0	0	0	0	0	0	0	0	0	0	0	0	0	0	0	0	0	0	0	0	0	0	0	0	0	0	0	0	0	0	0	0	0	0	0	0	0	0	0	0	0	0	0	0	0	0	0	0	0
0	0	0	0	0	0	0	0	0	0	0	0	0	0	0	0	0	0	0	0	0	0	0	0	0	0	0	0	0	0	0	0	0	0	0	0	0	0	0	0	0	0	0	0	0	0	0	0	0	0
0	0	0	0	0	0	0	0	0	0	0	0	0	0	0	0	0	0	0	0	0	0	0	0	0	0	0	0	0	0	0	0	0	0	0	0	0	0	0	0	0	0	0	0	0	0	0	0	0	0
0	0	0	0	0	0	0	0	0	0	0	0	0	0	0	0	0	0	0	0	0	0	0	0	0	0	0	0	0	0	0	0	0	0	0	0	0	0	0	0	0	0	0	0	0	0	0	0	0	0
0	0	0	0	0	0	0	0	0	0	0	0	0	0	0	0	0	0	0	0	0	0	0	0	0	0	0	0	0	0	0	0	0	0	0	0	0	0	0	0	0	0	0	0	0	0	0	0	0	0
0	0	0	0	0	0	0	0	0	0	0	0	0	0	0	0	0	0	0	0	0	0	0	0	0	0	0	0	0	0	0	0	0	0	0	0	0	0	0	0	0	0	0	0	0	0	0	0	0	0
0	0	0	0	0	0	0	0	0	0	0	0	0	0	0	0	0	0	0	0	0	0	0	0	0	0	0	0	0	0	0	0	0	0	0	0	0	0	0	0	0	0	0	0	0	0	0	0	0	0
0	0	0	0	0	0	0	0	0	0	0	0	0	0	0	0	0	0	0	0	0	0	0	0	0	0	0	0	0	0	0	0	0	0	0	0	0	0	0	0	0	0	0	0	0	0	0	0	0	0
0	0	0	0	0	0	0	0	0	0	0	0	0	0	0	0	0	0	0	0	0	0	0	0	0	0	0	0	0	0	0	0	0	0	0	0	0	0	0	0	0	0	0	0	0	0	0	0	0	0
0	0	0	0	0	0	0	0	0	0	0	0	0	0	0	0	0	0	0	0	0	0	0	0	0	0	0	0	0	0	0	0	0	0	0	0	0	0	0	0	0	0	0	0	0	0	0	0	0	0
0	0	0	0	0	0	0	0	0	0	0	0	0	0	0	0	0	0	0	0	0	0	0	0	0	0	0	0	0	0	0	0	0	0	0	0	0	0	0	0	0	0	0	0	0	0	0	0	0	0
0	0	0	0	0	0	0	0	0	0	0	0	0	0	0	0	0	0	-0.0790504	-0.0464929	-0.0154549	0.0210627	-0.0103306	0	0	0	0	0	0	0	0	0	0	0	0	0	0	0	0	0	0	0	0	0	0	0	0	0	0	0
0	0	0	0	0	0	0	0	0	0	0	0	0	0	0	0	0	0	-0.0278423	-0.0134458	-0.009284	0.0390841	-0.0174459	0	0	0	0	0	0	0	0	0	0	0	0	0	0	0	0	0	0	0	0	0	0	0	0	0	0	0
0	0	0	0	0	0	0	0	0	0	0	0	0	0	0	0	0	-0.0358133	0.00326844	-0.00243783	-0.0164857	0.00234271	-0.014918	0	0	0	0	0	0	0	0	0	0	0	0	0	0	0	0	0	0	0	0	0	0	0	0	0	0	0
0	0	0	0	0	0	0	0	0	0	0	0	0	0	0	0	-0.0845288	-0.00680206	-0.00337909	0.00998561	-0.0187242	-0.015486	-0.00497993	0.0223325	0	0	0	0	0	0	0	0	0	0	0	0	0	0	0	0	0	0	0	0	0	0	0	0	0	0
0	0	0	0	0	0	0	0	0	0	0	0	0	0	0	0	-0.0252607	0.00337685	0.00128639	0.0241556	-0.00374726	-0.018672	-0.0073373	0.00217173	0.0417016	0	0	0	0	0	0	0	0	0	0	0	0	0	0	0	0	0	0	0	0	0	0	0	0	0
0	0	0	0	0	0	0	0	0	0	0	0	0	0	0	-0.0271118	-0.0368779	-0.00925761	0.0546004	-0.0105817	-0.210009	-0.401748	-0.447766	-0.326424	-0.104609	0.168487	0	0	0	0	0	0	0	0	0	0	0	0	0	0	0	0	0	0	0	0	0	0	0	0
0	0	0	0	0	0	0	0	0	0	0	0	0	0	0.081232	0.0176603	-0.0414272	-0.168525	-0.0800034	0.0123503	-0.0415765	-0.221165	-0.323643	-0.21017	0.0456674	0.162649	0.218661	0	0	0	0	0	0	0	0	0	0	0	0	0	0	0	0	0	0	0	0	0	0	0
0	0	0	0	0	0	0	0	0	0	0	0	0	-0.0525151	0.00909656	0.0497449	0.0544934	0.0012858	0.00736102	-0.00250906	0.012302	0.022875	0.0207523	0.0103065	-0.00582725	0.00640108	0.0199742	0	0	0	0	0	0	0	0	0	0	0	0	0	0	0	0	0	0	0	0	0	0	0
0	0	0	0	0	0	0	0	0	0	0	0	-0.0726926	-0.0148582	0.00215357	0.0209107	0.0455401	0.0202095	-0.00936372	-0.0207819	-0.00310245	0.0117409	0.0201878	0.00250446	0.02083	-0.0178	-0.00955804	0.00583241	0	0	0	0	0	0	0	0	0	0	0	0	0	0	0	0	0	0	0	0	0	0
0	0	0	0	0	0	0	0	0	0	0	0	-0.0599917	-0.00670402	0.00759772	0.0316751	0.0347892	0.0085537	-0.0117387	-0.0225558	-0.00400987	0.00473171	0.00710387	0.00258085	0.0291547	-0.0136189	-0.0142684	0.000244853	0	0	0	0	0	0	0	0	0	0	0	0	0	0	0	0	0	0	0	0	0	0
0	0	0	0	0	0	0	0	0	0	0	0	-0.0522714	-0.00676611	-0.0100994	0.0169807	0.027483	0.00597748	-0.0305416	-0.0104158	-0.021482	-0.00676208	-0.00444214	0.00531935	0.0174947	-0.00469109	-0.00356424	-0.000857928	0	0	0	0	0	0	0	0	0	0	0	0	0	0	0	0	0	0	0	0	0	0
0	0	0	0	0	0	0	0	0	0	0	0	-0.0196396	0.0262896	0.025502	0.0433788	0.0374896	0.0041091	-0.0293808	-0.0234454	-0.0391264	-0.0228121	0.00382864	-4.46633e-05	0.000279586	-0.00150129	0.000217812	-0.00378091	-0.00332736	0	0	0	0	0	0	0	0	0	0	0	0	0	0	0	0	0	0	0	0	0
0	0	0	0	0	0	0	0	0	0	0	-0.0616392	-0.0261118	-0.0141512	-0.00869271	0.00134607	0.0215013	-0.0173111	-0.0170108	-0.00571586	-0.0275263	-0.027735	-0.0109933	-0.00821031	-0.00459018	-0.015783	-0.0170069	-0.0182615	-0.0143724	0	0	0	0	0	0	0	0	0	0	0	0	0	0	0	0	0	0	0	0	0
0	0	0	0	0	0	0	0	0	0	0	0.0270457	0.0516404	-0.0645598	-0.0879873	-0.0887527	-0.0786157	-0.110804	-0.106982	-0.109988	-0.148558	-0.178616	-0.163875	-0.148864	-0.126375	-0.115973	-0.0920752	-0.0760134	-0.0563076	0	0	0	0	0	0	0	0	0	0	0	0	0	0	0	0	0	0	0	0	0
0	0	0	0	0	0	0	0	0	0	0	0	-0.0195379	-0.0217972	-0.0146314	-0.0102568	-0.0177371	-0.0250542	-0.0232305	-0.0305328	-0.027352	-0.0263811	-0.0236774	-0.0356906	-0.0253499	-0.0311794	-0.0289214	-0.0337763	-0.0297758	0	0	0	0	0	0	0	0	0	0	0	0	0	0	0	0	0	0	0	0	0
0	0	0	0	0	0	0	0	0	0	0	-0.0719363	-0.0353096	-0.020777	-0.0192138	-0.0170551	-0.0275825	-0.0285798	-0.0303983	-0.0369031	-0.0381244	-0.0402455	-0.0369429	-0.031293	-0.0319928	-0.0292505	-0.0311568	-0.0331563	0	0	0	0	0	0	0	0	0	0	0	0	0	0	0	0	0	0	0	0	0	0
0	0	0	0	0	0	0	0	0	0	0	0	-0.0406007	-0.0457246	-0.0285802	-0.0249859	-0.0367134	-0.0390875	-0.0459854	-0.0504179	-0.0459383	-0.0354347	-0.0368409	-0.0402269	-0.0395177	-0.0300108	-0.0316052	-0.024863	0	0	0	0	0	0	0	0	0	0	0	0	0	0	0	0	0	0	0	0	0	0
0	0	0	0	0	0	0	0	0	0	0	0	-0.0496391	-0.0414366	-0.0296295	-0.0275951	-0.045612	-0.0374835	-0.0501918	-0.0593339	-0.0360377	-0.0304238	-0.0324772	-0.0333974	-0.0335593	-0.0299653	-0.0245523	0	0	0	0	0	0	0	0	0	0	0	0	0	0	0	0	0	0	0	0	0	0	0
0	0	0	0	0	0	0	0	0	0	0	0	-0.0482041	-0.0397929	-0.0357702	-0.0366497	-0.0448604	-0.0452529	-0.0526419	-0.0773889	-0.0505231	-0.0302377	-0.0345446	-0.0394002	-0.0354511	-0.0329344	0	0	0	0	0	0	0	0	0	0	0	0	0	0	0	0	0	0	0	0	0	0	0	0
0	0	0	0	0	0	0	0	0	0	0	0	-0.0582758	-0.0439321	-0.0346133	-0.0362369	-0.0500589	-0.0549788	-0.0529587	-0.0508438	-0.0434528	-0.0414461	-0.0376857	-0.0389067	-0.0305574	-0.0233452	0	0	0	0	0	0	0	0	0	0	0	0	0	0	0	0	0	0	0	0	0	0	0	0
0	0	0	0	0	0	0	0	0	0	0	0	-0.0593219	-0.0486814	-0.0374068	-0.0355779	-0.0518889	-0.0433982	-0.0441435	-0.0426364	-0.0489092	-0.0397683	-0.0366472	-0.03031	0	0	0	0	0	0	0	0	0	0	0	0	0	0	0	0	0	0	0	0	0	0	0	0	0	0
0	0	0	0	0	0	0	0	0	0	0	0	0	0	0	0	0	0	0	0	0	0	0	0	0	0	0	0	0	0	0	0	0	0	0	0	0	0	0	0	0	0	0	0	0	0	0	0	0	0
0	0	0	0	0	0	0	0	0	0	0	0	0	0	0	0	0	0	0	0	0	0	0	0	0	0	0	0	0	0	0	0	0	0	0	0	0	0	0	0	0	0	0	0	0	0	0	0	0	0
0	0	0	0	0	0	0	0	0	0	0	0	0	0	0	0	0	0	0	0	0	0	0	0	0	0	0	0	0	0	0	0	0	0	0	0	0	0	0	0	0	0	0	0	0	0	0	0	0	0
0	0	0	0	0	0	0	0	0	0	0	0	0	0	0	0	0	0	0	0	0	0	0	0	0	0	0	0	0	0	0	0	0	0	0	0	0	0	0	0	0	0	0	0	0	0	0	0	0	0
0	0	0	0	0	0	0	0	0	0	0	0	0	0	0	0	0	0	0	0	0	0	0	0	0	0	0	0	0	0	0	0	0	0	0	0	0	0	0	0	0	0	0	0	0	0	0	0	0	0
0	0	0	0	0	0	0	0	0	0	0	0	0	0	0	0	0	0	0	0	0	0	0	0	0	0	0	0	0	0	0	0	0	0	0	0	0	0	0	0	0	0	0	0	0	0	0	0	0	0
0	0	0	0	0	0	0	0	0	0	0	0	0	0	0	0	0	0	0	0	0	0	0	0	0	0	0	0	0	0	0	0	0	0	0	0	0	0	0	0	0	0	0	0	0	0	0	0	0	0
0	0	0	0	0	0	0	0	0	0	0	0	0	0	0	0	0	0	0	0	0	0	0	0	0	0	0	0	0	0	0	0	0	0	0	0	0	0	0	0	0	0	0	0	0	0	0	0	0	0
0	0	0	0	0	0	0	0	0	0	0	0	0	0	0	0	0	0	0	0	0	0	0	0	0	0	0	0	0	0	0	0	0	0	0	0	0	0	0	0	0	0	0	0	0	0	0	0	0	0
0	0	0	0	0	0	0	0	0	0	0	0	0	0	0	0	0	0	0	0	0	0	0	0	0	0	0	0	0	0	0	0	0	0	0	0	0	0	0	0	0	0	0	0	0	0	0	0	0	0
0	0	0	0	0	0	0	0	0	0	0	0	0	0	0	0	0	0	0	0	0	0	0	0	0	0	0	0	0	0	0	0	0	0	0	0	0	0	0	0	0	0	0	0	0	0	0	0	0	0
0	0	0	0	0	0	0	0	0	0	0	0	0	0	0	0	0	0	0	0	0	0	0	0	0	0	0	0	0	0	0	0	0	0	0	0	0	0	0	0	0	0	0	0	0	0	0	0	0	0
0	0	0	0	0	0	0	0	0	0	0	0	0	0	0	0	0	0	0	0	0	0	0	0	0	0	0	0	0	0	0	0	0	0	0	0	0	0	0	0	0	0	0	0	0	0	0	0	0	0
0	0	0	0	0	0	0	0	0	0	0	0	0	0	0	0	0	0	0	0	0	0	0	0	0	0	0	0	0	0	0	0	0	0	0	0	0	0	0	0	0	0	0	0	0	0	0	0	0	0
0	0	0	0	0	0	0	0	0	0	0	0	0	0	0	0	0	0	0	0	0	0	0	0	0	0	0	0	0	0	0	0	0	0	0	0	0	0	0	0	0	0	0	0	0	0	0	0	0	0
0	0	0	0	0	0	0	0	0	0	0	0	0	0	0	0	0	0	0	0	0	0	0	0	0	0	0	0	0	0	0	0	0	0	0	0	0	0	0	0	0	0	0	0	0	0	0	0	0	0
0	0	0	0	0	0	0	0	0	0	0	0	0	0	0	0	0	0	0	0	0	0	0	0	0	0	0	0	0	0	0	0	0	0	0	0	0	0	0	0	0	0	0	0	0	0	0	0	0	0
0	0	0	0	0	0	0	0	0	0	0	0	0	0	0	0	0	0	0	0	0	0	0	0	0	0	0	0	0	0	0	0	0	0	0	0	0	0	0	0	0	0	0	0	0	0	0	0	0	0
0	0	0	0	0	0	0	0	0	0	0	0	0	0	0	0	0	0	0	0	0	0	0	0	0	0	0	0	0	0	0	0	0	0	0	0	0	0	0	0	0	0	0	0	0	0	0	0	0	0
0	0	0	0	0	0	0	0	0	0	0	0	0	0	0	0	0	0	0	0	0	0	0	0	0	0	0	0	0	0	0	0	0	0	0	0	0	0	0	0	0	0	0	0	0	0	0	0	0	0
0	0	0	0	0	0	0	0	0	0	0	0	0	0	0	0	0	0	0	0	0	0	0	0	0	0	0	0	0	0	0	0	0	0	0	0	0	0	0	0	0	0	0	0	0	0	0	0	0	0
0	0	0	0	0	0	0	0	0	0	0	0	0	0	0	0	0	0	0	0	0	0	0	0	0	0	0	0	0	0	0	0	0	0	0	0	0	0	0	0	0	0	0	0	0	0	0	0	0	0
0	0	0	0	0	0	0	0	0	0	0	0	0	0	0	0	0	0	0	0	0	0	0	0	0	0	0	0	0	0	0	0	0	0	0	0	0	0	0	0	0	0	0	0	0	0	0	0	0	0
0	0	0	0	0	0	0	0	0	0	0	0	0	0	0	0	0	0	0	0	0	0	0	0	0	0	0	0	0	0	0	0	0	0	0	0	0	0	0	0	0	0	0	0	0	0	0	0	0	0
0	0	0	0	0	0	0	0	0	0	0	0	0	0	0	0	0	0	0	0	0	0	0	0	0	0	0	0	0	0	0	0	0	0	0	0	0	0	0	0	0	0	0	0	0	0	0	0	0	0
0	0	0	0	0	0	0	0	0	0	0	0	0	0	0	0	0	0	0	0	0	0	0	0	0	0	0	0	0	0	0	0	0	0	0	0	0	0	0	0	0	0	0	0	0	0	0	0	0	0
0	0	0	0	0	0	0	0	0	0	0	0	0	0	0	0	0	0	0	0	0	0	0	0	0	0	0	0	0	0	0	0	0	0	0	0	0	0	0	0	0	0	0	0	0	0	0	0	0	0
0	0	0	0	0	0	0	0	0	0	0	0	0	0	0	0	0	0	0	0	0	0	0	0	0	0	0	0	0	0	0	0	0	0	0	0	0	0	0	0	0	0	0	0	0	0	0	0	0	0
0	0	0	0	0	0	0	0	0	0	0	0	0	0	0	0	0	0	0	0	0	0	0	0	0	0	0	0	0	0	0	0	0	0	0	0	0	0	0	0	0	0	0	0	0	0	0	0	0	0
0	0	0	0	0	0	0	0	0	0	0	0	0	0	0	0	0	0	0	0	0	0	0	0	0	0	0	0	0	0	0	0	0	0	0	0	0	0	0	0	0	0	0	0	0	0	0	0	0	0
0	0	0	0	0	0	0	0	0	0	0	0	0	0	0	0	0	0	0	0	0	0	0	0	0	0	0	0	0	0	0	0	0	0	0	0	0	0	0	0	0	0	0	0	0	0	0	0	0	0
0	0	0	0	0	0	0	0	0	0	0	0	0	0	0	0	0	0	0	0	0	0	0	0	0	0	0	0	0	0	0	0	0	0	0	0	0	0	0	0	0	0	0	0	0	0	0	0	0	0
0	0	0	0	0	0	0	0	0	0	0	0	0	0	0	0	0	0	0	0	0	0	0	0	0	0	0	0	0	0	0	0	0	0	0	0	0	0	0	0	0	0	0	0	0	0	0	0	0	0
0	0	0	0	0	0	0	0	0	0	0	0	0	0	0	0	0	0	0	0	0	0	0	0	0	0	0	0	0	0	0	0	0	0	0	0	0	0	0	0	0	0	0	0	0	0	0	0	0	0
0	0	0	0	0	0	0	0	0	0	0	0	0	0	0	0	0	0	0	0	0	0	0	0	0	0	0	0	0	0	0	0	0	0	0	0	0	0	0	0	0	0	0	0	0	0	0	0	0	0
0	0	0	0	0	0	0	0	0	0	0	0	0	0	0	0	0	0	0	0	0	0	0	0	0	0	0	0	0	0	0	0	0	0	0	0	0	0	0	0	0	0	0	0	0	0	0	0	0	0
0	0	0	0	0	0	0	0	0	0	0	0	0	0	0	0	0	0	0	0	0	0	0	0	0	0	0	0	0	0	0	0	0	0	0	0	0	0	0	0	0	0	0	0	0	0	0	0	0	0
0	0	0	0	0	0	0	0	0	0	0	0	0	0	0	0	0	0	0	0	0	0	0	0	0	0	0	0	0	0	0	0	0	0	0	0	0	0	0	0	0	0	0	0	0	0	0	0	0	0
0	0	0	0	0	0	0	0	0	0	0	0	0	0	0	0	0	0	0	0	0	0	0	0	0	0	0	0	0	0	0	0	0	0	0	0	0	0	0	0	0	0	0	0	0	0	0	0	0	0
0	0	0	0	0	0	0	0	0	0	0	0	0	0	0	0	0	0	0	0	0	0	0	0	0	0	0	0	0	0	0	0	0	0	0	0	0	0	0	0	0	0	0	0	0	0	0	0	0	0
0	0	0	0	0	0	0	0	0	0	0	0	0	0	0	0	0	0	0	0	0	0	0	0	0	0	0	0	0	0	0	0	0	0	0	0	0	0	0	0	0	0	0	0	0	0	0	0	0	0
0	0	0	0	0	0	0	0	0	0	0	0	0	0	0	0	0	0	0	0	0	0	0	0	0	0	0	0	0	0	0	0	0	0	0	0	0	0	0	0	0	0	0	0	0	0	0	0	0	0
0	0	0	0	0	0	0	0	0	0	0	0	0	0	0	0	0	0	0	0	0	0	0	0	0	0	0	0	0	0	0	0	0	0	0	0	0	0	0	0	0	0	0	0	0	0	0	0	0	0
0	0	0	0	0	0	0	0	0	0	0	0	0	0	0	0	0	0	0	0	0	0	0	0	0	0	0	0	0	0	0	0	0	0	0	0	0	0	0	0	0	0	0	0	0	0	0	0	0	0
0	0	0	0	0	0	0	0	0	0	0	0	0	0	0	0	0	0	0	0	0	0	0	0	0	0	0	0	0	0	0	0	0	0	0	0	0	0	0	0	0	0	0	0	0	0	0	0	0	0
0	0	0	0	0	0	0	0	0	0	0	0	0	0	0	0	0	0	0	0	0	0	0	0	0	0	0	0	0	0	0	0	0	0	0	0	0	0	0	0	0	0	0	0	0	0	0	0	0	0
0	0	0	0	0	0	0	0	0	0	0	0	0	0	0	0	0	0	0	0	0	0	0	0	0	0	0	0	0	0	0	0	0	0	0	0	0	0	0	0	0	0	0	0	0	0	0	0	0	0
0	0	0	0	0	0	0	0	0	0	0	0	0	0	0	0	0	0	0	0	0	0	0	0	0	0	0	0	0	0	0	0	0	0	0	0	0	0	0	0	0	0	0	0	0	0	0	0	0	0
0	0	0	0	0	0	0	0	0	0	0	0	0	0	0	0	0	0	0	0	0	0	0	0	0	0	0	0	0	0	0	0	0	0	0	0	0	0	0	0	0	0	0	0	0	0	0	0	0	0
0	0	0	0	0	0	0	0	0	0	0	0	0	0	0	0	0	0	0	0	0	0	0	0	0	0	0	0	0	0	0	0	0	0	0	0	0	0	0	0	0	0	0	0	0	0	0	0	0	0
0	0	0	0	0	0	0	0	0	0	0	0	0	0	0	0	0	0	0	0	0	0	0	0	0	0	0	0	0	0	0	0	0	0	0	0	0	0	0	0	0	0	0	0	0	0	0	0	0	0
0	0	0	0	0	0	0	0	0	0	0	0	0	0	0	0	0	0	0	0	0	0	0	0	0	0	0	0	0	0	0	0	0	0	0	0	0	0	0	0	0	0	0	0	0	0	0	0	0	0
0	0	0	0	0	0	0	0	0	0	0	0	0	0	0	0	0	0	0	0	0	0	0	0	0	0	0	0	0	0	0	0	0	0	0	0	0	0	0	0	0	0	0	0	0	0	0	0	0	0
0	0	0	0	0	0	0	0	0	0	0	0	0	0	0	0	0	0	0	0	0	0	0	0	0	0	0	0	0	0	0	0	0	0	0	0	0	0	0	0	0	0	0	0	0	0	0	0	0	0
0	0	0	0	0	0	0	0	0	0	0	0	0	0	0	0	0	0	0	0	0	0	0	0	0	0	0	0	0	0	0	0	0	0	0	0	0	0	0	0	0	0	0	0	0	0	0	0	0	0
0	0	0	0	0	0	0	0	0	0	0	0	0	0	0	0	0	0	0	0	0	0	0	0	0	0	0	0	0	0	0	0	0	0	0	0	0	0	0	0	0	0	0	0	0	0	0	0	0	0
0	0	0	0	0	0	0	0	0	0	0	0	0	0	0	0	0	0	0	0	0	0	0	0	0	0	0	0	0	0	0	0	0	0	0	0	0	0	0	0	0	0	0	0	0	0	0	0	0	0
0	0	0	0	0	0	0	0	0	0	0	0	0	0	0	0	0	0	0	0	0	0	0	0	0	0	0	0	0	0	0	0	0	0	0	0	0	0	0	0	0	0	0	0	0	0	0	0	0	0
0	0	0	0	0	0	0	0	0	0	0	0	0	0	0	0	0	0	0	0	0	0	0	0	0	0	0	0	0	0	0	0	0	0	0	0	0	0	0	0	0	0	0	0	0	0	0	0	0	0
0	0	0	0	0	0	0	0	0	0	0	0	0	0	0	0	0	0	0	0	0	0	0	0	0	0	0	0	0	0	0	0	0	0	0	0	0	0	0	0	0	0	0	0	0	0	0	0	0	0
0	0	0	0	0	0	0	0	0	0	0	0	0	0	0	0	0	0	0	0	0	0	0	0	0	0	0	0	0	0	0	0	0	0	0	0	0	0	0	0	0	0	0	0	0	0	0	0	0	0
0	0	0	0	0	0	0	0	0	0	0	0	0	0	0	0	0	0	0	0	0	0	0	0	0	0	0	0	0	0	0	0	0	0	0	0	0	0	0	0	0	0	0	0	0	0	0	0	0	0
0	0	0	0	0	0	0	0	0	0	0	0	0	0	0	0	0	0	0	0	0	0	0	0	0	0	0	0	0	0	0	0	0	0	0	0	0	0	0	0	0	0	0	0	0	0	0	0	0	0
0	0	0	0	0	0	0	0	0	0	0	0	0	0	0	0	0	0	0	0	0	0	0	0	0	0	0	0	0	0	0	0	0	0	0	0	0	0	0	0	0	0	0	0	0	0	0	0	0	0
0	0	0	0	0	0	0	0	0	0	0	0	0	0	0	0	0	0	0	0	0	0	0	0	0	0	0	0	0	0	0	0	0	0	0	0	0	0	0	0	0	0	0	0	0	0	0	0	0	0
0	0	0	0	0	0	0	0	0	0	0	0	0	0	0	0	0	0	0	0	0	0	0	0	0	0	0	0	0	0	0	0	0	0	0	0	0	0	0	0	0	0	0	0	0	0	0	0	0	0
0	0	0	0	0	0	0	0	0	0	0	0	0	0	0	0	0	0	0	0	0	0	0	0	0	0	0	0	0	0	0	0	0	0	0	0	0	0	0	0	0	0	0	0	0	0	0	0	0	0
[truncated: 2,510 more columns]
