# Supplementary material for: Application of near-infrared hyperspectral imaging to identify a variety of silage maize seeds and common maize seeds
Source: RSC Adv. 2020 Mar 23;10(20):11707–15. doi: 10.1039/c9ra11047j (PMC9050551; doi:10.1039/c9ra11047j)
Supplement: RA-010-C9RA11047J-s003 [file RA-010-C9RA11047J-s003.xlsx]

## Sheet: Sheet1
0.067926	0.0877464	-0.0879257	0.0665547	-0.228427	0.0816574	-0.014067	-0.0816155
0.0682027	0.0863897	-0.0841834	0.0665937	-0.220503	0.07986	-0.00734978	-0.0782102
0.068534	0.0845718	-0.0794207	0.0669349	-0.210428	0.0793878	0.00458053	-0.081779
0.0689286	0.0826064	-0.0742402	0.0666579	-0.197411	0.0777369	0.0170914	-0.0807748
0.0692657	0.0808608	-0.0697395	0.0663508	-0.186174	0.0767069	0.0285277	-0.0792918
0.0694572	0.0798701	-0.0669156	0.0651994	-0.176594	0.0755038	0.0334204	-0.076497
0.0695762	0.0793341	-0.06497	0.0633402	-0.167408	0.0718775	0.0335168	-0.0677092
0.0697238	0.0788382	-0.0632106	0.0627064	-0.157553	0.070921	0.0425284	-0.0727044
0.0698974	0.0784553	-0.0624836	0.0638035	-0.147927	0.0712413	0.0697048	-0.11483
0.0699469	0.078678	-0.0620648	0.0617151	-0.137598	0.0696612	0.0768374	-0.118009
0.069956	0.0791702	-0.0619715	0.0596151	-0.127226	0.0665134	0.0768506	-0.113262
0.0699681	0.0797838	-0.0621548	0.0565214	-0.112574	0.0622564	0.0736074	-0.112246
0.069867	0.0808608	-0.0618988	0.0492788	-0.0983142	0.0540103	0.0339373	-0.0348887
0.0698832	0.0813599	-0.0614917	0.0455391	-0.0851377	0.0499237	0.0300803	-0.0228541
0.0699485	0.0816947	-0.0610085	0.0422159	-0.0706554	0.0468692	0.0343344	-0.0247431
0.0699783	0.0822576	-0.0609109	0.0383975	-0.0572562	0.0428228	0.0326788	-0.018166
0.0700029	0.0829071	-0.0613934	0.0352363	-0.0455174	0.0396206	0.0307559	-0.015908
0.0700049	0.0836694	-0.0624428	0.0322578	-0.0362774	0.0369194	0.0260158	-0.0120589
0.0699369	0.0845702	-0.0631532	0.0274051	-0.0275376	0.0338153	0.0280261	-0.0027027
0.0698971	0.0854032	-0.0640041	0.0235958	-0.0195532	0.0312292	0.0284354	-0.00143694
0.0698551	0.0862902	-0.0650954	0.0198113	-0.0118325	0.0289572	0.0267346	-0.000843887
0.0697946	0.0874114	-0.0666068	0.0160188	-0.00541322	0.0264828	0.0194285	0.00283779
0.0697366	0.0885571	-0.0682762	0.0114974	0.00200382	0.0237716	0.013781	0.0115108
0.0697052	0.0895672	-0.0699026	0.00480471	0.0121289	0.020379	0.024136	0.0329469
0.0696854	0.090398	-0.0713352	-0.00383008	0.0260017	0.0165174	0.0502289	0.0715504
0.0696759	0.0913019	-0.0723171	-0.00581916	0.0278724	0.0154475	0.0299565	0.0561927
0.0696776	0.0920609	-0.0729883	-0.00741185	0.0298912	0.0146644	0.00968435	0.0396141
0.0697006	0.0927227	-0.0737975	-0.0118104	0.0360428	0.0127985	0.00907754	0.0441998
0.0697267	0.0933359	-0.0745924	-0.0164773	0.0424509	0.0108648	0.0117265	0.0525642
0.0697416	0.0939467	-0.0753966	-0.020204	0.0466438	0.00939159	0.0101507	0.055525
0.069754	0.0945161	-0.0761796	-0.0239341	0.0506434	0.00785884	0.0107215	0.0608751
0.0697771	0.094976	-0.0767301	-0.027392	0.0547571	0.00626687	0.0118883	0.0663692
0.0697999	0.0953697	-0.077094	-0.0302331	0.0582953	0.0046618	0.0109969	0.0701989
0.0698165	0.095725	-0.0773207	-0.0325331	0.0615848	0.00288596	0.00803083	0.0739033
0.0698317	0.0960293	-0.0773994	-0.0344021	0.0646572	0.00100005	0.00388308	0.0773022
0.0698467	0.0962904	-0.07741	-0.0361874	0.0676131	-0.00089924	0.000921669	0.0812743
0.0698631	0.0965167	-0.0773438	-0.0378836	0.0704583	-0.00279641	-0.00147487	0.0853804
0.0698864	0.096703	-0.0771857	-0.0395172	0.0732235	-0.00461182	-0.00357085	0.0885859
0.0699097	0.096884	-0.0770053	-0.0411906	0.0758812	-0.0063774	-0.00520536	0.0913011
0.0699229	0.0971029	-0.0768628	-0.0428349	0.0783985	-0.00819374	-0.00736584	0.0936167
0.0699252	0.0973847	-0.0768188	-0.0445783	0.0807875	-0.0100097	-0.00968026	0.0953067
0.0699126	0.0977645	-0.0769562	-0.0465525	0.0830734	-0.011825	-0.0117396	0.0964963
0.069899	0.098075	-0.0769261	-0.0482009	0.0851975	-0.0136677	-0.0137737	0.096922
0.0699082	0.098053	-0.0761947	-0.0487437	0.0871189	-0.0155143	-0.0156805	0.0962398
0.0699487	0.0975766	-0.0745102	-0.0474485	0.0890641	-0.0175597	-0.0175224	0.0944358
0.070037	0.0964304	-0.0715261	-0.0434306	0.091303	-0.0200411	-0.0190813	0.0895158
0.0701758	0.0945533	-0.0669509	-0.0378387	0.0920182	-0.0221063	-0.0212513	0.0850803
0.070366	0.0919719	-0.060939	-0.0298829	0.0920703	-0.0242572	-0.0236847	0.0783951
0.0706247	0.0884614	-0.0530155	-0.0191624	0.0911269	-0.0262839	-0.0261915	0.0697563
0.0709702	0.0838226	-0.0428068	-0.00480818	0.0894237	-0.0282617	-0.0284436	0.0582702
0.0713778	0.0783523	-0.0310078	0.0120667	0.0870843	-0.0301137	-0.030462	0.0448975
0.0718135	0.072468	-0.0185911	0.0298134	0.0842379	-0.031706	-0.0324211	0.0315338
0.0722614	0.0663814	-0.00608485	0.0478008	0.0812913	-0.032973	-0.0339057	0.0185274
0.0726895	0.0605021	0.00554457	0.0645343	0.0786651	-0.0338058	-0.0345266	0.00686246
0.0731016	0.0547935	0.0163082	0.080112	0.0762399	-0.0341157	-0.034337	-0.00305668
0.0735194	0.0490076	0.0266642	0.0952373	0.0737141	-0.033847	-0.0333618	-0.0116103
0.0739168	0.0434867	0.0357768	0.108573	0.0713212	-0.0328449	-0.0313778	-0.0177522
0.0742747	0.0384911	0.0429789	0.119102	0.0691962	-0.0309241	-0.0281945	-0.0200804
0.0746021	0.0338671	0.0488722	0.127626	0.0673517	-0.028415	-0.0243337	-0.0200756
0.0749021	0.029507	0.0541048	0.13499	0.0659631	-0.0258049	-0.0204904	-0.0194746
0.0751808	0.0253056	0.0591103	0.141712	0.0649699	-0.023299	-0.0171739	-0.0191431
0.075455	0.021001	0.0648173	0.149011	0.0642757	-0.0212924	-0.0151761	-0.0208908
0.0757018	0.0168793	0.070631	0.156626	0.0643254	-0.0197931	-0.0145444	-0.0238716
0.0758869	0.0134029	0.0753864	0.163794	0.0656863	-0.0185931	-0.0150046	-0.026094
0.0760084	0.0105279	0.0795497	0.171828	0.0688112	-0.0180978	-0.0178299	-0.028874
0.0760588	0.00833512	0.083082	0.180815	0.07382	-0.0183982	-0.0220265	-0.0315062
0.0760492	0.00681918	0.0859325	0.189075	0.0798265	-0.0193215	-0.0277438	-0.0344892
0.0760139	0.00575399	0.0884576	0.194078	0.0850465	-0.0206092	-0.0340818	-0.0388613
0.0759482	0.0052326	0.0902245	0.196038	0.0900767	-0.0217225	-0.0399482	-0.0424646
0.0758701	0.00540206	0.0903577	0.195707	0.093224	-0.0225851	-0.0443405	-0.0432079
0.0757818	0.00613188	0.089597	0.19078	0.0945388	-0.0230588	-0.047215	-0.042947
0.0756861	0.0073994	0.0885546	0.179834	0.0933227	-0.0240362	-0.0494619	-0.0444971
0.0756007	0.00917488	0.0868335	0.165959	0.0899578	-0.024746	-0.0497204	-0.0445074
0.075548	0.0113831	0.0841507	0.153596	0.0851564	-0.0247107	-0.046868	-0.0396801
0.0755196	0.0134421	0.0888624	0.0596373	0.0493707	-0.0294397	-0.0557831	-0.0941638
0.0754895	0.0159793	0.088197	0.0104574	0.029822	-0.0329756	-0.0498136	-0.104982
0.0754512	0.0187923	0.0858614	-0.0209834	0.0168133	-0.0336944	-0.04653	-0.10908
0.0753914	0.0216191	0.0830266	-0.0441612	0.00772585	-0.0344157	-0.0434047	-0.108617
0.0753246	0.024348	0.0792429	-0.0531994	0.00441011	-0.0342017	-0.0399102	-0.0999725
0.0752869	0.0266696	0.0763785	-0.067371	-0.00120238	-0.0341266	-0.0364599	-0.0949049
0.0752722	0.0284009	0.0744497	-0.0825825	-0.00690827	-0.0342247	-0.0335324	-0.0916537
0.0752808	0.0293804	0.0728199	-0.0890817	-0.00891854	-0.0333986	-0.0310967	-0.0858624
0.0753097	0.0297909	0.0718266	-0.0935063	-0.00990768	-0.0323739	-0.0291611	-0.0804513
0.0753373	0.0300528	0.0708773	-0.0944344	-0.00939793	-0.0312345	-0.0276377	-0.0738332
0.0753657	0.0302737	0.0698553	-0.0931494	-0.00814676	-0.0300047	-0.026044	-0.0662201
0.075395	0.0307186	0.0686676	-0.0939059	-0.00823985	-0.0289728	-0.0236866	-0.0589767
0.0754154	0.0313162	0.0674125	-0.0956789	-0.0088467	-0.0281903	-0.0213424	-0.052424
0.0754234	0.0317646	0.0665174	-0.0977085	-0.00902683	-0.0276862	-0.0201962	-0.0478733
0.0754077	0.0323147	0.0657065	-0.100859	-0.00916649	-0.0276363	-0.0200287	-0.0452658
0.0753533	0.0331569	0.0647087	-0.104593	-0.00888012	-0.0281544	-0.0209529	-0.0441466
0.075276	0.034098	0.0637631	-0.108862	-0.00836488	-0.0290802	-0.0227738	-0.0444595
0.0751997	0.0349993	0.0630089	-0.113832	-0.00829404	-0.0301514	-0.0246715	-0.0454529
0.0751305	0.0357242	0.062517	-0.117956	-0.00802172	-0.0312205	-0.0266788	-0.0465012
0.0750848	0.0359974	0.0624987	-0.119309	-0.00688509	-0.0320009	-0.0285945	-0.0466939
0.0750572	0.0360106	0.0627751	-0.119183	-0.00556569	-0.032591	-0.0302936	-0.0461035
0.0750282	0.0361029	0.0630267	-0.119387	-0.00475044	-0.0332541	-0.0319222	-0.045157
0.0750118	0.036186	0.0632934	-0.119391	-0.00431034	-0.0338054	-0.0328304	-0.0434056
0.0750175	0.0362861	0.0635156	-0.119473	-0.00439109	-0.0341459	-0.0322086	-0.0407229
0.0750345	0.0363267	0.0637748	-0.119042	-0.00557131	-0.0342609	-0.0314276	-0.0343596
0.0750736	0.0360077	0.0644924	-0.118104	-0.00651479	-0.0342672	-0.029463	-0.0294961
0.0751283	0.0353725	0.0655694	-0.11663	-0.00840447	-0.0340118	-0.0275544	-0.0239104
0.0751887	0.0343749	0.0671374	-0.115807	-0.0108136	-0.0338464	-0.0252441	-0.0202143
0.0752683	0.032915	0.0692207	-0.114475	-0.0139348	-0.0334035	-0.0223342	-0.0164803
0.0753803	0.0309471	0.0717462	-0.111826	-0.0179721	-0.032501	-0.0183361	-0.0123803
0.0755249	0.0283369	0.0748358	-0.107609	-0.0225355	-0.0311405	-0.0129525	-0.00742138
0.0757057	0.0249107	0.0786069	-0.101211	-0.0271498	-0.0293212	-0.00587442	-0.00144549
0.0759181	0.0209107	0.0828584	-0.0928562	-0.0329975	-0.0268179	0.00167653	0.00446801
0.0761252	0.0166788	0.0872693	-0.0848089	-0.0383021	-0.0243316	0.00969489	0.00995383
0.0763268	0.012345	0.0916846	-0.0765952	-0.0437296	-0.0217006	0.0175556	0.0148396
0.0765066	0.00817675	0.0957843	-0.0687596	-0.0486039	-0.0192062	0.0252477	0.0196155
0.0766584	0.0041702	0.0995605	-0.0612737	-0.0527464	-0.0168704	0.0324588	0.0238348
0.076784	0.000155918	0.103141	-0.053411	-0.0559094	-0.0145783	0.0393168	0.0275982
0.0768668	-0.00361641	0.106144	-0.0446945	-0.0576065	-0.0132683	0.0469033	0.0321662
0.076886	-0.00695323	0.108616	-0.0378168	-0.0575486	-0.0116299	0.0512301	0.0339436
0.0768594	-0.0100461	0.110514	-0.0310551	-0.0563531	-0.0104132	0.0545498	0.0349146
0.0768085	-0.0130963	0.111959	-0.0243418	-0.0551641	-0.00936125	0.0567583	0.035032
0.076742	-0.0162429	0.113027	-0.0174699	-0.0544559	-0.00838603	0.0577715	0.0340792
0.0766804	-0.0197734	0.113896	-0.00981034	-0.0551203	-0.00737355	0.0579621	0.0323339
0.0766154	-0.0235457	0.114417	-0.00169981	-0.0571014	-0.00646152	0.0575286	0.0318431
0.076524	-0.0272601	0.114329	0.00611034	-0.0597964	-0.00587108	0.056547	0.0353536
0.0764217	-0.0310749	0.113725	0.0139779	-0.0639712	-0.00563435	0.0561526	0.046303
0.0763181	-0.0350544	0.112637	0.021962	-0.0702384	-0.00584281	0.0577877	0.0694441
0.0761791	-0.039141	0.11059	0.0296812	-0.0778121	-0.00639824	0.0588412	0.0942908
0.0759618	-0.0433856	0.107063	0.0369527	-0.0856491	-0.00708998	0.0554829	0.104911
0.0756422	-0.0477053	0.101788	0.0433984	-0.0931063	-0.00805422	0.0493122	0.104709
0.075179	-0.0519654	0.0944006	0.0484389	-0.0988594	-0.00932526	0.0418077	0.0956517
0.0745817	-0.0562083	0.0851468	0.0518334	-0.102496	-0.0113302	0.0392203	0.0986813
0.0738822	-0.0604684	0.0746621	0.0532844	-0.103862	-0.0147265	0.0523883	0.151824
0.0731662	-0.0649116	0.0644857	0.0537385	-0.103198	-0.0206198	0.141025	0.438023
0.0720202	-0.0686872	0.0478099	0.0511843	-0.0991694	-0.0277788	0.131445	0.410032
0.070549	-0.0717842	0.026378	0.0451238	-0.0907756	-0.0347913	0.0339656	0.0983071
0.0692303	-0.0750113	0.00799382	0.0391125	-0.0815847	-0.0435739	0.028449	0.0787408
0.0679287	-0.0779254	-0.00997909	0.0329132	-0.0716546	-0.0526456	0.0289268	0.0744958
0.0667087	-0.0804254	-0.0266853	0.0275664	-0.0627649	-0.0615684	0.0238732	0.0520732
0.0656095	-0.0825177	-0.0412599	0.0220596	-0.0552881	-0.0698732	0.0267218	0.0592392
0.0645764	-0.0840879	-0.0546547	0.016392	-0.0464459	-0.0778427	0.023644	0.0481037
0.0636838	-0.0850836	-0.0657674	0.0112228	-0.0378507	-0.0842998	0.0149354	0.018012
0.0630288	-0.0855308	-0.0732714	0.00755589	-0.0302602	-0.0888323	0.0120059	0.00558059
0.0625393	-0.085505	-0.0782543	0.0047805	-0.0230531	-0.0919611	0.00926286	-0.00727311
0.062147	-0.0851859	-0.0817374	0.00223871	-0.0163637	-0.0946542	0.00713209	-0.0165979
0.0618119	-0.0846708	-0.0843813	-0.000227037	-0.00975583	-0.0971783	0.00598827	-0.0230667
0.0614356	-0.0841046	-0.08767	-0.00337862	-0.00230833	-0.100217	0.00312981	-0.0372125
0.0610758	-0.0835752	-0.0909574	-0.00668977	0.00495315	-0.103154	-1.09249e-05	-0.0530269
0.0608474	-0.0831223	-0.0928388	-0.00904192	0.0105202	-0.104745	-0.00220986	-0.0647442
0.0607026	-0.0829532	-0.0942158	-0.0107041	0.0143386	-0.105284	-0.00351024	-0.0728565
0.060628	-0.0832811	-0.0955338	-0.0116245	0.0158431	-0.104765	-0.00301942	-0.0737502
0.0606343	-0.0839105	-0.0963918	-0.0118237	0.0155597	-0.103249	-0.00131606	-0.0697482
0.0606836	-0.0845387	-0.0968248	-0.0118424	0.0149636	-0.10139	0.000200713	-0.0666272
0.060803	-0.0850789	-0.0963956	-0.0113284	0.0140417	-0.0990639	0.00209289	-0.0626351
0.0610309	-0.0852896	-0.0941978	-0.0104776	0.0130224	-0.0960437	0.0042628	-0.0573446
0.0613165	-0.0853035	-0.0911324	-0.00933483	0.0120255	-0.0926912	0.006419	-0.0522585
0.0616024	-0.085446	-0.0883752	-0.00808556	0.0105322	-0.0891053	0.00858254	-0.0468653
0.0618767	-0.0855822	-0.0858933	-0.00716112	0.00958972	-0.0856558	0.0106796	-0.0424955
0.062102	-0.0856644	-0.0840723	-0.00724226	0.010539	-0.0828442	0.0126864	-0.0407796
0.0622922	-0.0856999	-0.0828093	-0.0068133	0.0103654	-0.0799809	0.0130259	-0.0424382
0.0625195	-0.0857202	-0.0810298	-0.00683335	0.0113139	-0.077097	0.0144716	-0.0422932
0.0627663	-0.0857779	-0.079097	-0.00632026	0.0114088	-0.0739166	0.0156236	-0.0418376
0.0630452	-0.086042	-0.0770376	-0.00523065	0.0106752	-0.0703513	0.0173658	-0.0389436
0.063345	-0.0863883	-0.0747045	-0.00409939	0.00934505	-0.0664605	0.0192673	-0.034641
0.0636287	-0.0866627	-0.0724787	-0.00300461	0.00835289	-0.0627403	0.0208573	-0.031216
0.0639096	-0.0868762	-0.0700704	-0.00214089	0.00738221	-0.0590094	0.0222602	-0.0277168
0.0642017	-0.0869699	-0.0672421	-0.00113654	0.00646269	-0.0552095	0.0235336	-0.0237412
0.0644851	-0.086977	-0.0642634	-0.000230314	0.00562079	-0.0516658	0.0249595	-0.0197193
0.0647583	-0.0870293	-0.061427	0.00072692	0.0045749	-0.0483706	0.0266617	-0.0155456
0.0650095	-0.0870881	-0.058836	0.00167187	0.00354584	-0.0456842	0.0287448	-0.0118864
0.0652196	-0.0871396	-0.0567696	0.00252084	0.00283591	-0.0439786	0.0312821	-0.00972228
0.0653906	-0.0871755	-0.055016	0.00289422	0.00248697	-0.0424126	0.0350784	-0.00795997
0.0655566	-0.0871991	-0.0533384	0.00342181	0.00202515	-0.0406579	0.0367227	-0.00649411
0.0657154	-0.0872464	-0.0518841	0.00402826	0.00127997	-0.0384142	0.0358709	-0.00560189
0.0658486	-0.0872904	-0.0505009	0.0038182	0.000866949	-0.0342729	0.0346029	-0.00389262
0.0659708	-0.0873414	-0.0492474	0.0035686	0.000299669	-0.0300824	0.032768	-0.00225843
0.0660739	-0.0873724	-0.0481935	0.00367705	-0.000427043	-0.0281572	0.033319	-0.00146683
0.0661633	-0.0873839	-0.0472198	0.00361293	-0.000992443	-0.0260489	0.0335528	-0.000848081
0.0662474	-0.0873687	-0.0461836	0.00281547	-0.00100395	-0.0208282	0.0296684	-1.95901e-05
0.0663282	-0.0873361	-0.0451079	0.00176389	-0.000700299	-0.0144329	0.0241195	0.000750891
0.066412	-0.0873098	-0.0440138	0.00080418	-0.000432506	-0.00843349	0.0191302	0.00156536
0.0664785	-0.0873592	-0.0427093	-0.00773681	0.00566697	0.0333057	-0.0309069	0.00650643
0.0665591	-0.087432	-0.0409017	-0.0225777	0.0130611	0.0909804	-0.0982313	0.00936061
0.0666782	-0.0874263	-0.0394561	-0.0237955	0.0136244	0.0992697	-0.105917	0.0107983
0.0668005	-0.0874131	-0.0378035	-0.0269237	0.0151714	0.115556	-0.122886	0.0129543
0.0669348	-0.0873464	-0.0360754	-0.026628	0.0146354	0.119298	-0.124643	0.0142968
0.0670723	-0.0872729	-0.0341432	-0.0277255	0.0146705	0.128361	-0.132591	0.0161433
0.0672175	-0.087169	-0.0319645	-0.0291495	0.0145886	0.139679	-0.14307	0.0180334
0.0673908	-0.0870213	-0.0295532	-0.0272576	0.0124782	0.139571	-0.139294	0.019431
0.0675834	-0.0868442	-0.026786	-0.0249212	0.00993174	0.139403	-0.134947	0.0208511
0.0677955	-0.0866414	-0.0235734	-0.0234851	0.00753669	0.144411	-0.13666	0.0227635
0.0680239	-0.0864024	-0.0200276	-0.0218775	0.0050579	0.150164	-0.138891	0.0250577
0.0682595	-0.08611	-0.0162737	-0.0196797	0.00257044	0.154235	-0.138984	0.027685
0.068501	-0.0857595	-0.0123799	-0.0169795	0.000402875	0.156884	-0.137314	0.0298781
0.0687476	-0.0853435	-0.00847018	-0.0129407	-0.00093413	0.155396	-0.131325	0.0294609
0.0689847	-0.0848673	-0.00435209	-0.00983953	-0.00238159	0.153059	-0.124073	0.0338806
0.0692235	-0.0843145	-0.00020535	-0.00726721	-0.00269494	0.153645	-0.121489	0.0335161
0.0694436	-0.0837007	0.00401081	-0.00580907	-0.00139164	0.156152	-0.121365	0.0348463
0.0696424	-0.0829909	0.00810036	-0.00503935	0.0016421	0.159792	-0.122961	0.0363122
0.06997	-0.0824533	0.0122259	-0.00667101	0.0117084	0.166867	-0.111756	0.0336139
0.0706482	-0.082437	0.0165171	-0.012566	0.0356843	0.178455	-0.06427	0.0195706
0.0718008	-0.0831457	0.021037	-0.0237961	0.0778803	0.195803	0.0327903	-0.00856343
0.0736169	-0.0848798	0.0259405	-0.0420266	0.144503	0.220537	0.200043	-0.0557509
0.0756773	-0.0870945	0.0306209	-0.0628495	0.220466	0.24771	0.394051	-0.110881
0.0772773	-0.0888368	0.034094	-0.0793474	0.28091	0.269307	0.543935	-0.1552
