# Supplementary material for: Application of near-infrared hyperspectral imaging to identify a variety of silage maize seeds and common maize seeds
Source: RSC Adv. 2020 Mar 23;10(20):11707–15. doi: 10.1039/c9ra11047j (PMC9050551; doi:10.1039/c9ra11047j)
Supplement: RA-010-C9RA11047J-s004 [file RA-010-C9RA11047J-s004.xlsx]

## Sheet: Sheet1
1001
1025
1116
1132
1156
1180
1204
1220
1254
1289
1301
1351
1375
1405
1460
1470
1564
1588
1625
