# Supplementary material for: Application of near-infrared hyperspectral imaging to identify a variety of silage maize seeds and common maize seeds
Source: RSC Adv. 2020 Mar 23;10(20):11707–15. doi: 10.1039/c9ra11047j (PMC9050551; doi:10.1039/c9ra11047j)
Supplement: RA-010-C9RA11047J-s006 [file RA-010-C9RA11047J-s006.xlsx]

## Sheet: Sheet1
	nm
Band1	874.41
Band2	877.76
Band3	881.11
Band4	884.46
Band5	887.82
Band6	891.17
Band7	894.52
Band8	897.87
Band9	901.22
Band10	904.58
Band11	907.93
Band12	911.28
Band13	914.63
Band14	917.99
Band15	921.34
Band16	924.69
Band17	928.05
Band18	931.4
Band19	934.76
Band20	938.11
Band21	941.46
Band22	944.82
Band23	948.17
Band24	951.53
Band25	954.88
Band26	958.24
Band27	961.59
Band28	964.95
Band29	968.3
Band30	971.66
Band31	975.01
Band32	978.37
Band33	981.72
Band34	985.08
Band35	988.44
Band36	991.79
Band37	995.15
Band38	998.51
Band39	1001.86
Band40	1005.22
Band41	1008.58
Band42	1011.93
Band43	1015.29
Band44	1018.65
Band45	1022.01
Band46	1025.37
Band47	1028.72
Band48	1032.08
Band49	1035.44
Band50	1038.8
Band51	1042.16
Band52	1045.52
Band53	1048.88
Band54	1052.23
Band55	1055.59
Band56	1058.95
Band57	1062.31
Band58	1065.67
Band59	1069.03
Band60	1072.39
Band61	1075.75
Band62	1079.11
Band63	1082.47
Band64	1085.83
Band65	1089.19
Band66	1092.56
Band67	1095.92
Band68	1099.28
Band69	1102.64
Band70	1106
Band71	1109.36
Band72	1112.72
Band73	1116.09
Band74	1119.45
Band75	1122.81
Band76	1126.17
Band77	1129.54
Band78	1132.9
Band79	1136.26
Band80	1139.26
Band81	1142.99
Band82	1146.35
Band83	1149.72
Band84	1153.08
Band85	1156.44
Band86	1159.81
Band87	1163.9
Band88	1166.54
Band89	1169.9
Band90	1173.26
Band91	1176.63
Band92	1179.99
Band93	1183.36
Band94	1186.72
Band95	1190.09
Band96	1193.46
Band97	1196.82
Band98	1200.19
Band99	1203.55
Band100	1206.92
Band101	1210.29
Band102	1213.65
Band103	1217.02
Band104	1220.39
Band105	1223.75
Band106	1227.12
Band107	1230.49
Band108	1233.85
Band109	1237.22
Band110	1240.59
Band111	1243.96
Band112	1247.33
Band113	1250.69
Band114	1254.06
Band115	1257.43
Band116	1260.8
Band117	1264.17
Band118	1267.54
Band119	1270.91
Band120	1274.27
Band121	1277.64
Band122	1281.01
Band123	1284.38
Band124	1287.75
Band125	1291.12
Band126	1294.49
Band127	1297.86
Band128	1301.23
Band129	1304.6
Band130	1307.97
Band131	1311.35
Band132	1314.72
Band133	1318.09
Band134	1321.46
Band135	1324.83
Band136	1328.2
Band137	1331.57
Band138	1334.95
Band139	1338.32
Band140	1341.69
Band141	1345.06
Band142	1348.44
Band143	1351.81
Band144	1355.18
Band145	1358.55
Band146	1361.93
Band147	1365.3
Band148	1368.67
Band149	1372.05
Band150	1375.42
Band151	1378.8
Band152	1382.17
Band153	1385.54
Band154	1388.92
Band155	1392.29
Band156	1395.67
Band157	1399.04
Band158	1402.42
Band159	1405.79
Band160	1409.17
Band161	1412.54
Band162	1415.92
Band163	1419.29
Band164	1422.67
Band165	1426.05
Band166	1429.42
Band167	1432.8
Band168	1436.18
Band169	1439.55
Band170	1442.93
Band171	1446.31
Band172	1449.68
Band173	1453.06
Band174	1456.44
Band175	1459.81
Band176	1463.19
Band177	1466.57
Band178	1469.95
Band179	1473.33
Band180	1476.71
Band181	1480.08
Band182	1483.46
Band183	1486.84
Band184	1490.22
Band185	1493.6
Band186	1496.98
Band187	1500.36
Band188	1503.74
Band189	1507.12
Band190	1510.5
Band191	1513.88
Band192	1517.26
Band193	1520.64
Band194	1524.02
Band195	1527.4
Band196	1530.78
Band197	1534.16
Band198	1537.54
Band199	1540.92
Band200	1544.3
Band201	1547.69
Band202	1551.07
Band203	1554.45
Band204	1557.83
Band205	1561.21
Band206	1564.6
Band207	1567.98
Band208	1571.36
Band209	1574.74
Band210	1578.13
Band211	1581.51
Band212	1584.89
Band213	1588.28
Band214	1591.66
Band215	1595.04
Band216	1598.43
Band217	1601.81
Band218	1605.2
Band219	1608.58
Band220	1611.96
Band221	1615.35
Band222	1618.58
Band223	1622.12
Band224	1625.5
Band225	1628.89
Band226	1632.27
Band227	1635.66
Band228	1639.04
Band229	1642.43
Band230	1645.82
Band231	1649.2
Band232	1652.59
Band233	1655.98
Band234	1659.36
Band235	1662.14
Band236	1666.14
Band237	1669.52
Band238	1672.91
Band239	1676.3
Band240	1679.68
Band241	1683.07
Band242	1686.07
Band243	1689.85
Band244	1693.24
Band245	1696.62
Band246	1700.01
Band247	1703.4
Band248	1706.79
Band249	1710.18
Band250	1713.57
Band251	1716.96
Band252	1720.35
Band253	1723.52
Band254	1727.13
Band255	1730.52
Band256	1733.91
