# Supplementary material for: Application of near-infrared hyperspectral imaging to identify a variety of silage maize seeds and common maize seeds
Source: RSC Adv. 2020 Mar 23;10(20):11707–15. doi: 10.1039/c9ra11047j (PMC9050551; doi:10.1039/c9ra11047j)
Supplement: RA-010-C9RA11047J-s007 [file RA-010-C9RA11047J-s007.xlsx]

## Sheet: Sheet1
0.398315	0.397602	0.396945	0.396325	0.3959	0.395917	0.396377	0.39697	0.398089	0.399488	0.401085	0.403044	0.404519	0.406294	0.408125	0.410017	0.411905	0.413717	0.415467	0.417222	0.419031	0.420835	0.422788	0.42496	0.427394	0.428671	0.429845	0.431384	0.432894	0.434155	0.435333	0.436397	0.437292	0.438049	0.438682	0.439236	0.439722	0.440156	0.440561	0.440953	0.441365	0.441842	0.442158	0.441985	0.441142	0.439339	0.436494	0.43259	0.427361	0.420547
0.43807	0.437503	0.437327	0.43723	0.437252	0.437536	0.438146	0.439042	0.440841	0.442452	0.444159	0.446237	0.446989	0.448798	0.450895	0.452863	0.454829	0.456631	0.458279	0.460019	0.461797	0.463516	0.465335	0.4673	0.469455	0.470778	0.47203	0.473529	0.47498	0.47621	0.477346	0.478393	0.4793	0.480086	0.480764	0.481364	0.481897	0.482384	0.482839	0.483269	0.483702	0.484169	0.484482	0.484375	0.483686	0.482171	0.479766	0.476432	0.471959	0.466135
0.435687	0.433872	0.431734	0.42935	0.427311	0.426268	0.425991	0.425687	0.425847	0.42661	0.42776	0.429325	0.430957	0.432213	0.433346	0.434753	0.436267	0.437864	0.439574	0.44124	0.442998	0.44499	0.447066	0.449063	0.45095	0.452558	0.453989	0.455419	0.456784	0.458066	0.45927	0.460317	0.461237	0.462069	0.462795	0.463432	0.463986	0.464453	0.464874	0.4653	0.465761	0.466304	0.466666	0.466452	0.465459	0.463365	0.460056	0.455553	0.449511	0.441617
0.430668	0.429646	0.428601	0.42749	0.426606	0.426235	0.426355	0.42653	0.42698	0.427862	0.428994	0.430324	0.43166	0.432877	0.434038	0.43532	0.436951	0.439017	0.439669	0.440826	0.442169	0.443718	0.445452	0.446964	0.448347	0.449695	0.450926	0.452127	0.453258	0.454247	0.455124	0.455887	0.456533	0.457085	0.457542	0.457908	0.458207	0.458463	0.458693	0.458923	0.459186	0.459515	0.459704	0.459446	0.458576	0.456828	0.454119	0.45047	0.445609	0.439288
0.467535	0.466635	0.465892	0.465137	0.464578	0.464487	0.464842	0.465427	0.466829	0.468278	0.469925	0.471971	0.472948	0.47462	0.476536	0.478425	0.480345	0.48217	0.483904	0.485707	0.487577	0.489443	0.491422	0.493507	0.495711	0.497183	0.498542	0.5001	0.501597	0.502887	0.504071	0.505128	0.506021	0.506771	0.507391	0.507921	0.508376	0.508781	0.509156	0.509519	0.509907	0.510365	0.510657	0.510438	0.509518	0.507592	0.504572	0.500458	0.494959	0.487801
0.405445	0.404172	0.402652	0.401019	0.399634	0.398897	0.398733	0.398584	0.398682	0.399169	0.399984	0.401039	0.402164	0.403023	0.403779	0.40473	0.40574	0.406816	0.407889	0.408966	0.410103	0.41141	0.41278	0.414078	0.415318	0.41638	0.417322	0.418267	0.419168	0.420005	0.420803	0.421468	0.422054	0.422604	0.423083	0.423466	0.423802	0.424085	0.424338	0.424583	0.42484	0.425145	0.425318	0.42509	0.424323	0.422796	0.42043	0.417235	0.412979	0.407445
0.400173	0.399383	0.398611	0.397855	0.397298	0.397217	0.39762	0.398106	0.39915	0.400471	0.401997	0.403873	0.405255	0.406932	0.40867	0.410471	0.412318	0.414145	0.415786	0.417481	0.419239	0.421029	0.422968	0.425067	0.427381	0.42867	0.429854	0.431351	0.432814	0.434043	0.435186	0.436209	0.437067	0.437789	0.438386	0.438902	0.439347	0.43974	0.440103	0.440454	0.440828	0.441269	0.441551	0.441343	0.440463	0.43862	0.43573	0.431786	0.426513	0.419652
0.458254	0.45636	0.454037	0.451483	0.449277	0.448057	0.447622	0.447154	0.447044	0.447469	0.448313	0.449539	0.450836	0.45173	0.452483	0.453512	0.454645	0.455906	0.457292	0.45864	0.460075	0.461761	0.463528	0.465218	0.466811	0.468184	0.469396	0.470604	0.471758	0.472849	0.473875	0.474747	0.475499	0.47616	0.476722	0.477205	0.477618	0.477961	0.478272	0.478595	0.478962	0.479421	0.479719	0.479474	0.478492	0.476459	0.473269	0.468948	0.463167	0.455623
[truncated: 151 more columns]

## Sheet: explanation
1	DT397
2	QC8
3	QC11
4	QC13
5	QC9
6	QC19
7	QC29
8	QC513
