# Supplementary material for: Application of near-infrared hyperspectral imaging to identify a variety of silage maize seeds and common maize seeds
Source: RSC Adv. 2020 Mar 23;10(20):11707–15. doi: 10.1039/c9ra11047j (PMC9050551; doi:10.1039/c9ra11047j)
Supplement: RA-010-C9RA11047J-s010 [file RA-010-C9RA11047J-s010.xlsx]

## Sheet: Sheet1
0	0	0	0	0	0	0	0	0	0	0	0	0	0	0	0	0	0	0	0	0	0	0	0	0	0	0	0	0	0	0	0	0	0	0	0	0	0	0	0	0	0	0	0	0	0	0	0	0	0
0	0	0	0	0	0	0	0	0	0	0	0	0	0	0	0	0	0	0	0	0	0	0	0	0	0	0	0	0	0	0	0	0	0	0	0	0	0	0	0	0	0	0	0	0	0	0	0	0	0
0	0	0	0	0	0	0	0	0	0	0	0	0	0	0	0	0	0	0	0	0	0	0	0	0	0	0	0	0	0	0	0	0	0	0	0	0	0	0	0	0	0	0	0	0	0	0	0	0	0
0	0	0	0	0	0	0	0	0	0	0	0	0	0	0	0	0	0	0	0	0	0	0	0	0	0	0	0	0	0	0	0	0	0	0	0	0	0	0	0	0	0	0	0	0	0	0	0	0	0
0	0	0	0	0	0	0	0	0	0	0	0	0	0	0	0	0	0	0	0	0	0	0	0	0	0	0	0	0	0	0	0	0	0	0	0	0	0	0	0	0	0	0	0	0	0	0	0	0	0
0	0	0	0	0	0	0	0	0	0	0	0	0	0	0	0	0	0	0	0	0	0	0	0	0	0	0	0	0	0	0	0	0	0	0	0	0	0	0	0	0	0	0	0	0	0	0	0	0	0
0	0	0	0	0	0	0	0	0	0	0	0	0	0	0	0	0	0	0	0	0	0	0	0	0	0	0	0	0	0	0	0	0	0	0	0	0	0	0	0	0	0	0	0	0	0	0	0	0	0
0	0	0	0	0	0	0	0	0	0	0	0	0	0	0	0	0	0	0	0	0	0	0	0	0	0	0	0	0	0	0	0	0	0	0	0	0	0	0	0	0	0	0	0	0	0	0	0	0	0
0	0	0	0	0	0	0	0	0	0	0	0	0	0	0	0	0	0	0	0	0	0	0	0	0	0	0	0	0	0	0	0	0	0	0	0	0	0	0	0	0	0	0	0	0	0	0	0	0	0
0	0	0	0	0	0	0	0	0	0	0	0	0	0	0	0	0	0	0	0	0	0	0	0	0	0	0	0	0	0	0	0	0	0	0	0	0	0	0	0	0	0	0	0	0	0	0	0	0	0
0	0	0	0	0	0	0	0	0	0	0	0	0	0	0	0	0	0	0	0	0	0	0	0	0	0	0	0	0	0	0	0	0	0	0	0	0	0	0	0	0	0	0	0	0	0	0	0	0	0
0	0	0	0	0	0	0	0	0	0	0	0	0	0	0	0	0	0	0	0	0	0	0	0	0	0	0	0	0	0	0	0	0	0	0	0	0	0	0	0	0	0	0	0	0	0	0	0	0	0
0	0	0	0	0	0	0	0	0	0	0	0	0	0	0	0	0	0	0	0	0	0	0	0	0	0	0	0	0	0	0	0	0	0	0	0	0	0	0	0	0	0	0	0	0	0	0	0	0	0
0	0	0	0	0	0	0	0	0	0	0	0	0	0	0	0	0	0	0	0	0	0	0	0	0	0	0	0	0	0	0	0	0	0	0	0	0	0	0	0	0	0	0	0	0	0	0	0	0	0
0	0	0	0	0	0	0	0	0	0	0	0	0	0	0	0	0	0	0	0	0	0	0	0	0	0	0	0	0	0	0	0	0	0	0	0	0	0	0	0	0	0	0	0	0	0	0	0	0	0
0	0	0	0	0	0	0	0	0	0	0	0	0	0	0	0	0	0	0	0	0	0	0	0	0	0	0	0	0	0	0	0	0	0	0	0	0	0	0	0	0	0	0	0	0	0	0	0	0	0
0	0	0	0	0	0	0	0	0	0	0	0	0	0	0	0	0	0	0	0	0	0	0	0	0	0	0	0	0	0	0	0	0	0	0	0	0	0	0	0	0	0	0	0	0	0	0	0	0	0
0	0	0	0	0	0	0	0	0	0	0	0	0	0	0	0	0	0	0	0	0	0	0	0	0	0	0	0	0	0	0	0	0	0	0	0	0	0	0	0	0	0	0	0	0	0	0	0	0	0
0	0	0	0	0	0	0	0	0	0	0	0	0	0	0	0	0	0	0	0	0	0	0	0	0	0	0	0	0	0	0	0	0	0	0	0	0	0	0	0	0	0	0	0	0	0	0	0	0	0
0	0	0	0	0	0	0	0	0	0	0	0	0	0	0	0	0	0	0	0	0	0	0	0	0	0	0	0	0	0	0	0	0	0	0	0	0	0	0	0	0	0	0	0	0	0	0	0	0	0
0	0	0	0	0	0	0	0	0	0	0	0	0	0	0	0	0	0	0	0	0	0	0	0	0	0	0	0	0	0	0	0	0	0	0	0	0	0	0	0	0	0	0	0	0	0	0	0	0	0
0	0	0	0	0	0	0	0	0	0	0	0	0	0	0	0	0	0	0	0	0	0	0	0	0	0	0	0	0	0	0	0	0	0	0	0	0	0	0	0	0	0	0	0	0	0	0	0	0	0
0	0	0	0	0	0	0	0	0	0	0	0	0	0	0	0	0	0	0	0	0	0	0	0	0	0	0	0	0	0	0	0	0	0	0	0	0	0	0	0	0	0	0	0	0	0	0	0	0	0
0	0	0	0	0	0	0	0	0	0	0	0	0	0	0	0	0	0	0	0	0	0	0	0	0	0	0	0	0	0	0	0	0	0	0	0	0	0	0	0	0	0	0	0	0	0	0	0	0	0
0	0	0	0	0	0	0	0	0	0	0	0	0	0	0	0	0	0	0	0	0	0	0	0	0	0	0	0	0	0	0	0	0	0	0	0	0	0	0	0	0	0	0	0	0	0	0	0	0	0
0	0	0	0	0	0	0	0	0	0	0	0	0	0	0	0	0	0	0	0	0	0	0	0	0	0	0	0	0	0	0	0	0	0	0	0	0	0	0	0	0	0	0	0	0	0	0	0	0	0
0	0	0	0	0	0	0	0	0	0	0	0	0	0	0	0	0	0	0	0	0	0	0	0	0	0	0	0	0	0	0	0	0	0	0	0	0	0	0	0	0	0	0	0	0	0	0	0	0	0
0	0	0	0	0	0	0	0	0	0	0	0	0	0	0	0	0	0	0	0	0	0	0	0	0	0	0	0	0	0	0	0	0	0	0	0	0	0	0	0	0	0	0	0	0	0	0	0	0	0
0	0	0	0	0	0	0	0	0	0	0	0	0	0	0	0	0	0	0	0	0	0	0	0	0	0	0	0	0	0	0	0	0	0	0	0	0	0	0	0	0	0	0	0	0	0	0	0	0	0
0	0	0	0	0	0	0	0	0	0	0	0	0	0	0	0	0	0	0	0	0	0	0	0	0	0	0	0	0	0	0	0	0	0	0	0	0	0	0	0	0	0	0	0	0	0	0	0	0	0
0	0	0	0	0	0	0	0	0	0	0	0	0	0	0	0	0	0	0	0	0	0	0	0	0	0	0	0	0	0	0	0	0	0	0	0	0	0	0	0	0	0	0	0	0	0	0	0	0	0
0	0	0	0	0	0	0	0	0	0	0	0	0	0	0	0	0	0	0	0	0	0	0	0	0	0	0	0	0	0	0	0	0	0	0	0	0	0	0	0	0	0	0	0	0	0	0	0	0	0
0	0	0	0	0	0	0	0	0	0	0	0	0	0	0	0	0	0	0	0	0	0	0	0	0	0	0	0	0	0	0	0	0	0	0	0	0	0	0	0	0	0	0	0	0	0	0	0	0	0
0	0	0	0	0	0	0	0	0	0	0	0	0	0	0	0	0	0	0	0	0	0	0	0	0	0	0	0	0	0	0	0	0	0	0	0	0	0	0	0	0	0	0	0	0	0	0	0	0	0
0	0	0	0	0	0	0	0	0	0	0	0	0	0	0	0	0	0	0	0	0	0	0	0	0	0	0	0	0	0	0	0	0	0	0	0	0	0	0	0	0	0	0	0	0	0	0	0	0	0
0	0	0	0	0	0	0	0	0	0	0	0	0	0	0	0	0	0	0	0	0	0	0	0	0	0	0	0	0	0	0	0	0	0	0	0	0	0	0	0	0	0	0	0	0	0	0	0	0	0
0	0	0	0	0	0	0	0	0	0	0	0	0	0	0	0	0	0	0	0	0	0	0	0	0	0	0	0	0	0	0	0	0	0	0	0	0	0	0	0	0	0	0	0	0	0	0	0	0	0
0	0	0	0	0	0	0	0	0	0	0	0	0	0	0	0	0	0	0	0	0	0	0	0	0	0	0	0	0	0	0	0	0	0	0	0	0	0	0	0	0	0	0	0	0	0	0	0	0	0
0	0	0	0	0	0	0	0	0	0	0	0	0	0	0	0	0	0	0	0	0	0	0	0	0	0	0	0	0	0	0	0	0	0	0	0	0	0	0	0	0	0	0	0	0	0	0	0	0	0
0	0	0	0	0	0	0	0	0	0	0	0	0	0	0	0	0	0	0	0	0	0	0	0	0	0	0	0	0	0	0	0	0	0	0	0	0	0	0	0	0	0	0	0	0	0	0	0	0	0
0	0	0	0	0	0	0	0	0	0	0	0	0	0	0	0	0	0	0	0	0	0	0	0	0	0	0	0	0	0	0	0	0	0	0	0	0	0	0	0	0	0	0	0	0	0	0	0	0	0
0	0	0	0	0	0	0	0	0	0	0	0	0	0	0	0	0	0	0	0	0	0	0	0	0	0	0	0	0	0	0	0	0	0	0	0	0	0	0	0	0	0	0	0	0	0	0	0	0	0
0	0	0	0	0	0	0	0	0	0	0	0	0	0	0	0	0	0	0	0	0	0	0	0	0	0	0	0	0	0	0	0	0	0	0	0	0	0	0	0	0	0	0	0	0	0	0	0	0	0
0	0	0	0	0	0	0	0	0	0	0	0	0	0	0	0	0	0	0	0	0	0	0	0	0	0	0	0	0	0	0	0	0	0	0	0	0	0	0	0	0	0	0	0	0	0	0	0	0	0
0	0	0	0	0	0	0	0	0	0	0	0	0	0	0	0	0	0	0	0	0	0	0	0	0	0	0	0	0	0	0	0	0	0	0	0	0	0	0	0	0	0	0	0	0	0	0	0	0	0
0	0	0	0	0	0	0	0	0	0	0	0	0	0	0	0	0	0	0	0	0	0	0	0	0	0	0	0	0	0	0	0	0	0	0	0	0	0	0	0	0	0	0	0	0	0	0	0	0	0
0	0	0	0	0	0	0	0	0	0	0	0	0	0	0	0	0	0	0	0	0	0	0	0	0	0	0	0	0	0	0	0	0	0	0	0	0	0	0	0	0	0	0	0	0	0	0	0	0	0
0	0	0	0	0	0	0	0	0	0	0	0	0	0	0	0	0	0	0	0	0	0	0	0	0	0	0	0	0	0	0	0	0	0	0	0	0	0	0	0	0	0	0	0	0	0	0	0	0	0
0	0	0	0	0	0	0	0	0	0	0	0	0	0	0	0	0	0	0	0	0	0	0	0	0	0	0	0	0	0	0	0	0	0	0	0	0	0	0	0	0	0	0	0	0	0	0	0	0	0
0	0	0	0	0	0	0	0	0	0	0	0	0	0	0	0	0	0	0	0	0	0	0	0	0	0	0	0	0	0	0	0	0	0	0	0	0	0	0	0	0	0	0	0	0	0	0	0	0	0
0	0	0	0	0	0	0	0	0	0	0	0	0	0	0	0	0	0	0	0	0	0	0	0	0	0	0	0	0	0	0	0	0	0	0	0	0	0	0	0	0	0	0	0	0	0	0	0	0	0
0	0	0	0	0	0	0	0	0	0	0	0	0	0	0	0	0	0	0	0	0	0	0	0	0	0	0	0	0	0	0	0	0	0	0	0	0	0	0	0	0	0	0	0	0	0	0	0	0	0
0	0	0	0	0	0	0	0	0	0	0	0	0	0	0	0	0	0	0	0	0	0	0	0	0	0	0	0	0	0	0	0	0	0	0	0	0	0	0	0	0	0	0	0	0	0	0	0	0	0
0	0	0	0	0	0	0	0	0	0	0	0	0	0	0	0	0	0	0	0	0	0	0	0	0	0	0	0	0	0	0	0	0	0	0	0	0	0	0	0	0	0	0	0	0	0	0	0	0	0
0	0	0	0	0	0	0	0	0	0	0	0	0	0	0	0	0	0	0	0	0	0	0	0	0	0	0	0	0	0	0	0	0	0	0	0	0	0	0	0	0	0	0	0	0	0	0	0	0	0
0	0	0	0	0	0	0	0	0	0	0	0	0	0	0	0	0	0	0	0	0	0	0	0	0	0	0	0	0	0	0	0	0	0	0	0	0	0	0	0	0	0	0	0	0	0	0	0	0	0
0	0	0	0	0	0	0	0	0	0	0	0	0	0	0	0	0	0	0	0	0	0	0	0	0	0	0	0	0	0	0	0	0	0	0	0	0	0	0	0	0	0	0	0	0	0	0	0	0	0
0	0	0	0	0	0	0	0	0	0	0	0	0	0	0	0	0	0	0	0	0	0	0	0	0	0	0	0	0	0	0	0	0	0	0	0	0	0	0	0	0	0	0	0	0	0	0	0	0	0
0	0	0	0	0	0	0	0	0	0	0	0	0	0	0	0	0	0	0	0	0	0	0	0	0	0	0	0	0	0	0	0	0	0	0	0	0	0	0	0	0	0	0	0	0	0	0	0	0	0
0	0	0	0	0	0	0	0	0	0	0	0	0	0	0	0	0	0	0	0	0	0	0	0	0	0	0	0	0	0	0	0	0	0	0	0	0	0	0	0	0	0	0	0	0	0	0	0	0	0
0	0	0	0	0	0	0	0	0	0	0	0	0	0	0	0	0	0	0	0	0	0	0	0	0	0	0	0	0	0	0	0	0	0	0	0	0	0	0	0	0	0	0	0	0	0	0	0	0	0
0	0	0	0	0	0	0	0	0	0	0	0	0	0	0	0	0	0	0	0	0	0	0	0	0	0	0	0	0	0	0	0	0	0	0	0	0	0	0	0	0	0	0	0	0	0	0	0	0	0
0	0	0	0	0	0	0	0	0	0	0	0	0	0	0	0	0	0	0	0	0	0	0	0	0	0	0	0	0	0	0	0	0	0	0	0	0	0	0	0	0	0	0	0	0	0	0	0	0	0
0	0	0	0	0	0	0	0	0	0	0	0	0	0	0	0	0	0	0	0	0	0	0	0	0	0	0	0	0	0	0	0	0	0	0	0	0	0	0	0	0	0	0	0	0	0	0	0	0	0
0	0	0	0	0	0	0	0	0	0	0	0	0	0	0	0	0	0	0	0	0	0	0	0	0	0	0	0	0	0	0	0	0	0	0	0	0	0	0	0	0	0	0	0	0	0	0	0	0	0
0	0	0	0	0	0	0	0	0	0	0	0	0	0	0	0	0	0	0	0	0	0	0	0	0	0	0	0	0	0	0	0	0	0	0	0	0	0	0	0	0	0	0	0	0	0	0	0	0	0
0	0	0	0	0	0	0	0	0	0	0	0	0	0	0	0	0	0	0	0	0	0	0	0	0	0	0	0	0	0	0	0	0	0	0	0	0	0	0	0	0	0	0	0	0	0	0	0	0	0
0	0	0	0	0	0	0	0	0	0	0	0	0	0	0	0	0	0	0	0	0	0	0	0	0	0	0	0	0	0	0	0	0	0	0	0	0	0	0	0	0	0	0	0	0	0	0	0	0	0
0	0	0	0	0	0	0	0	0	0	0	0	0	0	0	0	0	0	0	0	0	0	0	0	0	0	0	0	0	0	0	0	0	0	0	0	0	0	0	0	0	0	0	0	0	0	0	0	0	0
0	0	0	0	0	0	0	0	0	0	0	0	0	0	0	0	0	0	0	0	0	0	0	0	0	0	0	0	0	0	0	0	0	0	0	0	0	0	0	0	0	0	0	0	0	0	0	0	0	0
0	0	0	0	0	0	0	0	0	0	0	0	0	0	0	0	0	0	0	0	0	0	0	0	0	0	0	0	0	0	0	0	0	0	0	0	0	0	0	0	0	0	0	0	0	0	0	0	0	0
0	0	0	0	0	0	0	0	0	0	0	0	0	0	0	0	0	0	0	0	0	0	0	0	0	0	0	0	0	0	0	0	0	0	0	0	0	0	0	0	0	0	0	0	0	0	0	0	0	0
0	0	0	0	0	0	0	0	0	0	0	0	0	0	0	0	0	0	0	0	0	0	0	0	0	0	0	0	0	0	0	0	0	0	0	0	0	0	0	0	0	0	0	0	0	0	0	0	0	0
0	0	0	0	0	0	0	0	0	0	0	0	0	0	0	0	0	0	0	0	0	0	0	0	0	0	0	0	0	0	0	0	0	0	0	0	0	0	0	0	0	0	0	0	0	0	0	0	0	0
0	0	0	0	0	0	0	0	0	0	0	0	0	0	0	0	0	0	0	0	0	0	0	0	0	0	0	0	0	0	0	0	0	0	0	0	0	0	0	0	0	0	0	0	0	0	0	0	0	0
0	0	0	0	0	0	0	0	0	0	0	0	0	0	0	0	0	0	0	0	0	0	0	0	0	0	0	0	0	0	0	0	0	0	0	0	0	0	0	0	0	0	0	0	0	0	0	0	0	0
0	0	0	0	0	0	0	0	0	0	0	0	0	0	0	0	0	0	0	0	0	0	0	0	0	0	0	0	0	0	0	0	0	0	0	0	0	0	0	0	0	0	0	0	0	0	0	0	0	0
0	0	0	0	0	0	0	0	0	0	0	0	0	0	0	0	0	0	0	0	0	0	0	0	0	0	0	0	0	0	0	0	0	0	0	0	0	0	0	0	0	0	0	0	0	0	0	0	0	0
0	0	0	0	0	0	0	0	0	0	0	0	0	0	0	0	0	0	0	0	0	0	0	0	0	0	0	0	0	0	0	0	0	0	0	0	0	0	0	0	0	0	0	0	0	0	0	0	0	0
0	0	0	0	0	0	0	0	0	0	0	0	0	0	0	0	0	0	0	0	0	0	0	0	0	0	0	0	0	0	0	0	0	0	0	0	0	0	0	0	0	0	0	0	0	0	0	0	0	0
0	0	0	0	0	0	0	0	0	0	0	0	0	0	0	0	0	0	0	0	0	0	0	0	0	0	0	0	0	0	0	0	0	0	0	0	0	0	0	0	0	0	0	0	0	0	0	0	0	0
0	0	0	0	0	0	0	0	0	0	0	0	0	0	0	0	0	0	0	0	0	0	0	0	0	0	0	0	0	0	0	0	0	0	0	0	0	0	0	0	0	0	0	0	0	0	0	0	0	0
0	0	0	0	0	0	0	0	0	0	0	0	0	0	0	0	0	0	0	0	0	0	0	0	0	0	0	0	0	0	0	0	0	0	0	0	0	0	0	0	0	0	0	0	0	0	0	0	0	0
0	0	0	0	0	0	0	0	0	0	0	0	0	0	0	0	0	0	0	0	0	0	0	0	0	0	0	0	0	0	0	0	0	0	0	0	0	0	0	0	0	0	0	0	0	0	0	0	0	0
0	0	0	0	0	0	0	0	0	0	0	0	0	0	0	0	0	0	0	0	0	0	0	0	0	0	0	0	0	0	0	0	0	0	0	0	0	0	0	0	0	0	0	0	0	0	0	0	0	0
0	0	0	0	0	0	0	0	0	0	0	0	0	0	0	0	0	0	0	0	0	0	0	0	0	0	0	0	0	0	0	0	0	0	0	0	0	0	0	0	0	0	0	0	0	0	0	0	0	0
0	0	0	0	0	0	0	0	0	0	0	0	0	0	0	0	0	0	0	0	0	0	0	0	0	0	0	0	0	0	0	0	0	0	0	0	0	0	0	0	0	0	0	0	0	0	0	0	0	0
0	0	0	0	0	0	0	0	0	0	0	0	0	0	0	0	0	0	0	0	0	0	0	0	0	0	0	0	0	0	0	0	0	0	0	0	0	0	0	0	0	0	0	0	0	0	0	0	0	0
0	0	0	0	0	0	0	0	0	0	0	0	0	0	0	0	0	0	0	0	0	0	0	0	0	0	0	0	0	0	0	0	0	0	0	0	0	0	0	0	0	0	0	0	0	0	0	0	0	0
0	0	0	0	0	0	0	0	0	0	0	0	0	0	0	0	0	0	0	0	0	0	0	0	0	0	0	0	0	0	0	0	0	0	0	0	0	0	0	0	0	0	0	0	0	0	0	0	0	0
0	0	0	0	0	0	0	0	0	0	0	0	0	0	0	0	0	0	0	0	0	0	0	0	0	0	0	0	0	0	0	0	0	0	0	0	0	0	0	0	0	0	0	0	0	0	0	0	0	0
0	0	0	0	0	0	0	0	0	0	0	0	0	0	0	0	0	0	0	0	0	0	0	0	0	0	0	0	0	0	0	0	0	0	0	0	0	0	0	0	0	0	0	0	0	0	0	0	0	0
0	0	0	0	0	0	0	0	0	0	0	0	0	0	0	0	0	0	0	0	0	0	0	0	0	0	0	0	0	0	0	0	0	0	0	0	0	0	0	0	0	0	0	0	0	0	0	0	0	0
0	0	0	0	0	0	0	0	0	0	0	0	0	0	0	0	0	0	0	0	0	0	0	0	0	0	0	0	0	0	0	0	0	0	0	0	0	0	0	0	0	0	0	0	0	0	0	0	0	0
0	0	0	0	0	0	0	0	0	0	0	0	0	0	0	0	0	0	0	0	0	0	0	0	0	0	0	0	0	0	0	0	0	0	0	0	0	0	0	0	0	0	0	0	0	0	0	0	0	0
0	0	0	0	0	0	0	0	0	0	0	0	0	0	0	0	0	0	0	0	0	0	0	0	0	0	0	0	0	0	0	0	0	0	0	0	0	0	0	0	0	0	0	0	0	0	0	0	0	0
0	0	0	0	0	0	0	0	0	0	0	0	0	0	0	0	0	0	0	0	0	0	0	0	0	0	0	0	0	0	0	0	0	0	0	0	0	0	0	0	0	0	0	0	0	0	0	0	0	0
0	0	0	0	0	0	0	0	0	0	0	0	0	0	0	0	0	0	0	0	0	0	0	0	0	0	0	0	0	0	0	0	0	0	0	0	0	0	0	0	0	0	0	0	0	0	0	0	0	0
0	0	0	0	0	0	0	0	0	0	0	0	0	0	0	0	0	0	0	0	0	0	0	0	0	0	0	0	0	0	0	0	0	0	0	0	0	0	0	0	0	0	0	0	0	0	0	0	0	0
0	0	0	0	0	0	0	0	0	0	0	0	0	0	0	0	0	0	0	0	0	0	0	0	0	0	0	0	0	0	0	0	0	0	0	0	0	0	0	0	0	0	0	0	0	0	0	0	0	0
0	0	0	0	0	0	0	0	0	0	0	0	0	0	0	0	0	0	0	0	0	0	0	0	0	0	0	0	0	0	0	0	0	0	0	0	0	0	0	0	0	0	0	0	0	0	0	0	0	0
0	0	0	0	0	0	0	0	0	0	0	0	0	0	0	0	0	0	0	0	0	0	0	0	0	0	0	0	0	0	0	0	0	0	0	0	0	0	0	0	0	0	0	0	0	0	0	0	0	0
0	0	0	0	0	0	0	0	0	0	0	0	0	0	0	0	0	0	0	0	0	0	0	0	0	0	0	0	0	0	0	0	0	0	0	0	0	0	0	0	0	0	0	0	0	0	0	0	0	0
0	0	0	0	0	0	0	0	0	0	0	0	0	0	0	0	0	0	0	0	0	0	0	0	0	0	0	0	0	0	0	0	0	0	0	0	0	0	0	0	0	0	0	0	0	0	0	0	0	0
0	0	0	0	0	0	0	0	0	0	0	0	0	0	0	0	0	0	0	0	0	0	0	0	0	0	0	0	0	0	0	0	0	0	0	0	0	0	0	0	0	0	0	0	0	0	0	0	0	0
0	0	0	0	0	0	0	0	0	0	0	0	0	0	0	0	0	0	0	0	0	0	0	0	0	0	0	0	0	0	0	0	0	0	0	0	0	0	0	0	0	0	0	0	0	0	0	0	0	0
0	0	0	0	0	0	0	0	0	0	0	0	0	0	0	0	0	0	0	0	0	0	0	0	0	0	0	0	0	0	0	0	0	0	0	0	0	0	0	0	0	0	0	0	0	0	0	0	0	0
0	0	0	0	0	0	0	0	0	0	0	0	0	0	0	0	0	0	0	0	0	0	0	0	0	0	0	0	0	0	0	0	0	0	0	0	0	0	0	0	0	0	0	0	0	0	0	0	0	0
0	0	0	0	0	0	0	0	0	0	0	0	0	0	0	0	0	0	0	0	0	0	0	0	0	0	0	0	0	0	0	0	0	0	0	0	0	0	0	0	0	0	0	0	0	0	0	0	0	0
0	0	0	0	0	0	0	0	0	0	0	0	0	0	0	0	0	0	0	0	0	0	0	0	0	0	0	0	0	0	0	0	0	0	0	0	0	0	0	0	0	0	0	0	0	0	0	0	0	0
0	0	0	0	0	0	0	0	0	0	0	0	0	0	0	0	0	0	0	0	0	0	0	0	0	0	0	0	0	0	0	0	0	0	0	0	0	0	0	0	0	0	0	0	0	0	0	0	0	0
0	0	0	0	0	0	0	0	0	0	0	0	0	0	0	0	0	0	0	0	0	0	0	0	0	0	0	0	0	0	0	0	0	0	0	0	0	0	0	0	0	0	0	0	0	0	0	0	0	0
0	0	0	0	0	0	0	0	0	0	0	0	0	0	0	0	0	0	0	0	0	0	0	0	0	0	0	0	0	0	0	0	0	0	0	0	0	0	0	0	0	0	0	0	0	0	0	0	0	0
0	0	0	0	0	0	0	0	0	0	0	0	0	0	0	0	0	0	0	0	0	0	0	0	0	0	0	0	0	0	0	0	0	0	0	0	0	0	0	0	0	0	0	0	0	0	0	0	0	0
0	0	0	0	0	0	0	0	0	0	0	0	0	0	0	0	0	0	0	0	0	0	0	0	0	0	0	0	0	0	0	0	0	0	0	0	0	0	0	0	0	0	0	0	0	0	0	0	0	0
0	0	0	0	0	0	0	0	0	0	0	0	0	0	0	0	0	0	0	0	0	0.144523	0.0297302	-0.0709117	-0.0811036	-0.0797528	-0.0763213	0	0	0	0	0	0	0	0	0	0	0	0	0	0	0	0	0	0	0	0	0	0	0
0	0	0	0	0	0	0	0	0	0	0	0	0	0	0	0	0	0	0	0	0.158591	0.0752213	-0.0173819	-0.046952	-0.0486645	-0.0450555	-0.0407667	-0.0303356	-0.0465259	0	0	0	0	0	0	0	0	0	0	0	0	0	0	0	0	0	0	0	0	0
0	0	0	0	0	0	0	0	0	0	0	0	0	0	0	-0.14759	-0.098096	0	0	0.0720054	0.102769	0.0178488	-0.0255937	-0.02465	-0.0208811	-0.0257174	-0.0185744	-0.0168297	-0.0362627	-0.0489744	0	0	0	0	0	0	0	0	0	0	0	0	0	0	0	0	0	0	0	0
0	0	0	0	0	0	0	0	0	0	0	0	0	0	-0.0455095	-0.158081	-0.0634738	-0.0751541	-0.0672123	0.0608117	0.0658244	0.00603716	-0.00811056	-0.00723437	-0.00975507	-0.00729524	-0.0150663	-0.0200638	-0.0318176	-0.0445622	-0.0427376	0	0	0	0	0	0	0	0	0	0	0	0	0	0	0	0	0	0	0
0	0	0	0	0	0	0	0	0	0	0	0	0	0	-0.0984493	-0.107801	-0.0622516	-0.0962882	-0.0511779	0.0659924	0.0464539	0.00858665	-0.00486816	-0.00532721	-0.00471277	-0.00722173	-0.0176091	-0.0131139	-0.0329907	-0.0506311	-0.0424598	-0.0338711	-0.0457591	0	0	0	0	0	0	0	0	0	0	0	0	0	0	0	0	0
0	0	0	0	0	0	0	0	0	0	0	0	0	-0.0374106	-0.128713	-0.0924567	-0.0787898	-0.105096	-0.0288782	0.0630149	0.0372963	0.00876437	-0.00644562	-0.00645456	-0.0149355	-0.0160244	-0.0270452	-0.0202316	-0.0319746	-0.0431933	-0.0430595	-0.0451768	-0.0462196	-0.0396957	0	0	0	0	0	0	0	0	0	0	0	0	0	0	0	0
0	0	0	0	0	0	0	0	0	0	0	0	0	-0.0333244	-0.0711711	-0.0946487	-0.0471264	-0.0783657	-0.023014	0.0935331	0.107245	0.0533055	0.0122103	-0.0317484	-0.0718758	-0.0930077	-0.0821858	-0.0672676	-0.0631462	-0.0791707	-0.0585622	-0.0422469	-0.0615085	-0.0366246	-0.0356391	0	0	0	0	0	0	0	0	0	0	0	0	0	0	0
0	0	0	0	0	0	0	0	0	0	0	0	0	0.0498449	-0.0720569	-0.112123	-0.0429927	0.0125862	-0.0232949	0.0844926	0.148523	0.0941964	0.0412573	0.0261424	-0.0272942	-0.0842584	-0.126925	-0.215826	-0.259299	-0.205881	-0.167257	-0.121877	-0.0854052	-0.0296765	-0.027044	-0.0473187	0	0	0	0	0	0	0	0	0	0	0	0	0	0
0	0	0	0	0	0	0	0	0	0	0	0	0	0	-0.00219558	-0.0649916	0.0207127	0.0687676	0.0699012	0.0894096	0.152046	0.139577	0.0513649	-0.016098	-0.0269479	-0.0303833	-0.0322682	-0.050958	-0.0697935	-0.109888	-0.0973271	-0.0787919	-0.0773818	-0.0285986	-0.00422141	0.0273654	0.0402013	-0.0299578	0	0	0	0	0	0	0	0	0	0	0	0
0	0	0	0	0	0	0	0	0	0	0	0	0	0	0.0481825	0.00245027	0.0699273	0.101134	0.092143	0.105229	0.143349	0.149989	0.0499766	-0.0170179	-0.0322552	-0.0493936	-0.049188	-0.0460513	-0.0781158	-0.117948	-0.0948548	-0.0727644	-0.0663785	-0.0206175	0.0187171	0.0496578	0.0808869	0.033799	-0.00791823	0	0	0	0	0	0	0	0	0	0	0
0	0	0	0	0	0	0	0	0	0	0	0	0	0.133114	0.0494591	0.0312089	0.0929156	0.128979	0.144207	0.138874	0.141108	0.125735	0.0529125	-0.00787942	-0.0348477	-0.0508479	-0.0501055	-0.0386564	-0.0520589	-0.0772319	-0.0585126	-0.0430804	-0.0295341	0.0081524	0.0397016	0.0811179	0.126603	0.133147	0.0488793	0	0	0	0	0	0	0	0	0	0	0
0	0	0	0	0	0	0	0	0	0	0	0	0	0.126577	0.0568675	0.068623	0.126267	0.147727	0.158703	0.156756	0.146873	0.113527	0.059855	0.00392687	-0.033384	-0.0497169	-0.0539309	-0.0441221	-0.0489468	-0.0710022	-0.0490916	-0.0391868	-0.0211935	0.0218624	0.0545945	0.109015	0.156227	0.143735	0.068752	0	0	0	0	0	0	0	0	0	0	0
0	0	0	0	0	0	0	0	0	0	0	0	0	0.110073	0.059062	0.0964698	0.15463	0.161726	0.166292	0.172419	0.112079	0.0765609	0.0451231	0.0132603	-0.0274571	-0.0421919	-0.0524654	-0.0382594	-0.0399884	-0.0622066	-0.0460184	-0.0334282	-0.039662	0.0179314	0.0593955	0.110006	0.156269	0.145936	0.0792693	0	0	0	0	0	0	0	0	0	0	0
0	0	0	0	0	0	0	0	0	0	0	0	0	0.110179	0.0193441	0.0504737	0.115139	0.123886	0.118531	0.131134	0.0697891	0.0382182	0.0240158	0.0265972	0.0111333	-0.0270819	-0.0369987	-0.0364925	-0.0419139	-0.0603266	-0.0387833	-0.0420179	-0.0323158	0.0167964	0.0582633	0.109453	0.151068	0.129433	0.0874518	0	0	0	0	0	0	0	0	0	0	0
0	0	0	0	0	0	0	0	0	0	0	0	0	0	0.047168	0.0241678	0.0427318	0.0578181	0.0785671	0.0777607	0.0393174	0.0230293	0.0134318	0.00557454	0.00138212	0.00537869	-0.00749803	-0.0313753	-0.0367244	-0.0540873	-0.048791	-0.0520946	-0.0706477	-0.0128214	0.0516219	0.102251	0.137989	0.116576	0.0725852	0	0	0	0	0	0	0	0	0	0	0
0	0	0	0	0	0	0	0	0	0	0	0	0	0	0	0	-0.0232801	-0.0113364	0.0169322	0.0291809	-0.00211025	-0.0172701	-0.0263353	-0.0356176	-0.0417883	-0.0483084	-0.0476663	-0.0472896	-0.111988	-0.173337	-0.114762	-0.0878673	-0.156744	-0.0608872	0.0308372	0.0515002	0.0295039	-0.070976	0	0	0	0	0	0	0	0	0	0	0	0
0	0	0	0	0	0	0	0	0	0	0	0	0	0	0	0	0	0.068152	0.0703417	0.0945674	0.0587557	0.0383904	0.0331621	0.031558	0.00711973	0.000439931	-0.0108322	0.00336756	-0.0111748	-0.0284216	-0.0411423	-0.0532519	-0.0184042	0.0353011	0.0712938	0.0813587	0.0663615	0	0	0	0	0	0	0	0	0	0	0	0	0
0	0	0	0	0	0	0	0	0	0	0	0	0	0	0	0	0	0	0.0896658	0.0894281	0.0724625	0.046464	0.0329154	0.0269571	0.0121248	0.00683332	-0.00249877	-0.000363705	-0.0134286	-0.039545	-0.0900151	-0.0707836	-0.0174242	0.0583244	0.0794485	0.0674401	0	0	0	0	0	0	0	0	0	0	0	0	0	0
0	0	0	0	0	0	0	0	0	0	0	0	0	0	0	0	0	0	0	0.111002	0.0719068	0.0530708	0.0351166	0.0325104	0.0204544	0.0172232	0.00721155	0.00715821	-0.0148683	-0.0741677	-0.0735618	-0.0234214	0.00365231	0.0525329	0.0514372	0	0	0	0	0	0	0	0	0	0	0	0	0	0	0
0	0	0	0	0	0	0	0	0	0	0	0	0	0	0	0	0	0	0	0	0	0.0791081	0.0393397	0.0339249	0.0196073	0.020886	0.00841059	0.00417188	-0.0236633	-0.0303513	-0.00157578	0.0237601	0.00639753	0.0503864	0	0	0	0	0	0	0	0	0	0	0	0	0	0	0	0
0	0	0	0	0	0	0	0	0	0	0	0	0	0	0	0	0	0	0	0	0	0	0	0.0682263	0.0502539	0.037	0.02248	0.0211772	0.0107099	0.0178929	0.0334524	0.037719	0	0	0	0	0	0	0	0	0	0	0	0	0	0	0	0	0	0
0	0	0	0	0	0	0	0	0	0	0	0	0	0	0	0	0	0	0	0	0	0	0	0	0	0	0	0	0	0	0	0	0	0	0	0	0	0	0	0	0	0	0	0	0	0	0	0	0	0
0	0	0	0	0	0	0	0	0	0	0	0	0	0	0	0	0	0	0	0	0	0	0	0	0	0	0	0	0	0	0	0	0	0	0	0	0	0	0	0	0	0	0	0	0	0	0	0	0	0
0	0	0	0	0	0	0	0	0	0	0	0	0	0	0	0	0	0	0	0	0	0	0	0	0	0	0	0	0	0	0	0	0	0	0	0	0	0	0	0	0	0	0	0	0	0	0	0	0	0
0	0	0	0	0	0	0	0	0	0	0	0	0	0	0	0	0	0	0	0	0	0	0	0	0	0	0	0	0	0	0	0	0	0	0	0	0	0	0	0	0	0	0	0	0	0	0	0	0	0
0	0	0	0	0	0	0	0	0	0	0	0	0	0	0	0	0	0	0	0	0	0	0	0	0	0	0	0	0	0	0	0	0	0	0	0	0	0	0	0	0	0	0	0	0	0	0	0	0	0
0	0	0	0	0	0	0	0	0	0	0	0	0	0	0	0	0	0	0	0	0	0	0	0	0	0	0	0	0	0	0	0	0	0	0	0	0	0	0	0	0	0	0	0	0	0	0	0	0	0
0	0	0	0	0	0	0	0	0	0	0	0	0	0	0	0	0	0	0	0	0	0	0	0	0	0	0	0	0	0	0	0	0	0	0	0	0	0	0	0	0	0	0	0	0	0	0	0	0	0
0	0	0	0	0	0	0	0	0	0	0	0	0	0	0	0	0	0	0	0	0	0	0	0	0	0	0	0	0	0	0	0	0	0	0	0	0	0	0	0	0	0	0	0	0	0	0	0	0	0
0	0	0	0	0	0	0	0	0	0	0	0	0	0	0	0	0	0	0	0	0	0	0	0	0	0	0	0	0	0	0	0	0	0	0	0	0	0	0	0	0	0	0	0	0	0	0	0	0	0
0	0	0	0	0	0	0	0	0	0	0	0	0	0	0	0	0	0	0	0	0	0	0	0	0	0	0	0	0	0	0	0	0	0	0	0	0	0	0	0	0	0	0	0	0	0	0	0	0	0
0	0	0	0	0	0	0	0	0	0	0	0	0	0	0	0	0	0	0	0	0	0	0	0	0	0	0	0	0	0	0	0	0	0	0	0	0	0	0	0	0	0	0	0	0	0	0	0	0	0
0	0	0	0	0	0	0	0	0	0	0	0	0	0	0	0	0	0	0	0	0	0	0	0	0	0	0	0	0	0	0	0	0	0	0	0	0	0	0	0	0	0	0	0	0	0	0	0	0	0
0	0	0	0	0	0	0	0	0	0	0	0	0	0	0	0	0	0	0	0	0	0	0	0	0	0	0	0	0	0	0	0	0	0	0	0	0	0	0	0	0	0	0	0	0	0	0	0	0	0
0	0	0	0	0	0	0	0	0	0	0	0	0	0	0	0	0	0	0	0	0	0	0	0	0	0	0	0	0	0	0	0	0	0	0	0	0	0	0	0	0	0	0	0	0	0	0	0	0	0
0	0	0	0	0	0	0	0	0	0	0	0	0	0	0	0	0	0	0	0	0	0	0	0	0	0	0	0	0	0	0	0	0	0	0	0	0	0	0	0	0	0	0	0	0	0	0	0	0	0
0	0	0	0	0	0	0	0	0	0	0	0	0	0	0	0	0	0	0	0	0	0	0	0	0	0	0	0	0	0	0	0	0	0	0	0	0	0	0	0	0	0	0	0	0	0	0	0	0	0
0	0	0	0	0	0	0	0	0	0	0	0	0	0	0	0	0	0	0	0	0	0	0	0	0	0	0	0	0	0	0	0	0	0	0	0	0	0	0	0	0	0	0	0	0	0	0	0	0	0
0	0	0	0	0	0	0	0	0	0	0	0	0	0	0	0	0	0	0	0	0	0	0	0	0	0	0	0	0	0	0	0	0	0	0	0	0	0	0	0	0	0	0	0	0	0	0	0	0	0
0	0	0	0	0	0	0	0	0	0	0	0	0	0	0	0	0	0	0	0	0	0	0	0	0	0	0	0	0	0	0	0	0	0	0	0	0	0	0	0	0	0	0	0	0	0	0	0	0	0
0	0	0	0	0	0	0	0	0	0	0	0	0	0	0	0	0	0	0	0	0	0	0	0	0	0	0	0	0	0	0	0	0	0	0	0	0	0	0	0	0	0	0	0	0	0	0	0	0	0
0	0	0	0	0	0	0	0	0	0	0	0	0	0	0	0	0	0	0	0	0	0	0	0	0	0	0	0	0	0	0	0	0	0	0	0	0	0	0	0	0	0	0	0	0	0	0	0	0	0
0	0	0	0	0	0	0	0	0	0	0	0	0	0	0	0	0	0	0	0	0	0	0	0	0	0	0	0	0	0	0	0	0	0	0	0	0	0	0	0	0	0	0	0	0	0	0	0	0	0
0	0	0	0	0	0	0	0	0	0	0	0	0	0	0	0	0	0	0	0	0	0	0	0	0	0	0	0	0	0	0	0	0	0	0	0	0	0	0	0	0	0	0	0	0	0	0	0	0	0
0	0	0	0	0	0	0	0	0	0	0	0	0	0	0	0	0	0	0	0	0	0	0	0	0	0	0	0	0	0	0	0	0	0	0	0	0	0	0	0	0	0	0	0	0	0	0	0	0	0
0	0	0	0	0	0	0	0	0	0	0	0	0	0	0	0	0	0	0	0	0	0	0	0	0	0	0	0	0	0	0	0	0	0	0	0	0	0	0	0	0	0	0	0	0	0	0	0	0	0
0	0	0	0	0	0	0	0	0	0	0	0	0	0	0	0	0	0	0	0	-0.0893495	-0.0420419	-0.0688453	-0.0748717	-0.0800134	0	0	0	0	0	0	0	0	0	0	0	0	0	0	0	0	0	0	0	0	0	0	0	0	0
0	0	0	0	0	0	0	0	0	0	0	0	0	0	0	0	0.0494346	-0.00852266	-0.0384123	-0.111294	-0.128406	-0.0513938	-0.0457276	-0.106354	-0.149001	-0.110822	-0.0948416	-0.0517601	-0.0802624	-0.182712	0	0	0	0	0	0	0	0	0	0	0	0	0	0	0	0	0	0	0	0
0	0	0	0	0	0	0	0	0	0	0	0	0	0	0	0.0227165	0.032123	0.00175916	-0.0810453	-0.146429	-0.160268	-0.0768296	-0.0283271	-0.0642142	-0.118668	-0.0876744	-0.0745949	-0.0669594	-0.0546182	-0.155879	0	0	0	0	0	0	0	0	0	0	0	0	0	0	0	0	0	0	0	0
0	0	0	0	0	0	0	0	0	0	0	0	0	0	0.084669	-0.0236598	-0.00627789	-0.0177098	-0.12435	-0.141368	-0.144505	-0.0746673	-0.0299347	-0.0797234	-0.144563	-0.108532	-0.0887236	-0.0553229	-0.0970064	-0.137779	0	0	0	0	0	0	0	0	0	0	0	0	0	0	0	0	0	0	0	0
0	0	0	0	0	0	0	0	0	0	0	0	0	0	0.0490242	-0.0388857	-0.0327836	-0.0306929	-0.0800097	-0.0926156	-0.0910972	-0.0642762	-0.0467402	-0.09819	-0.177301	-0.153826	-0.121981	-0.0599407	-0.0885694	-0.154603	0	0	0	0	0	0	0	0	0	0	0	0	0	0	0	0	0	0	0	0
0	0	0	0	0	0	0	0	0	0	0	0	0	0	0.0256821	-0.0620917	-0.0639022	-0.0418093	-0.0812741	-0.0888145	-0.096912	-0.0633777	-0.0857504	-0.0946099	-0.124021	-0.134598	-0.118833	-0.0623753	-0.0835182	-0.127634	0	0	0	0	0	0	0	0	0	0	0	0	0	0	0	0	0	0	0	0
0	0	0	0	0	0	0	0	0	0	0	0	0	0	0.018161	-0.066235	-0.0623416	-0.0461357	-0.0555361	-0.0702667	-0.0880639	-0.0552624	-0.108021	-0.118236	-0.0688073	-0.0935303	-0.10273	-0.0856357	-0.0881155	-0.116532	-0.142372	0	0	0	0	0	0	0	0	0	0	0	0	0	0	0	0	0	0	0
0	0	0	0	0	0	0	0	0	0	0	0	0	0	-0.0034027	-0.0779757	-0.0658965	-0.0601724	-0.0592013	-0.0694899	-0.103692	-0.106853	-0.111691	-0.190388	-0.139024	-0.0530712	-0.0431759	-0.020184	-0.0488653	-0.10698	-0.168274	0	0	0	0	0	0	0	0	0	0	0	0	0	0	0	0	0	0	0
0	0	0	0	0	0	0	0	0	0	0	0	0	0	0.00194143	-0.0628794	-0.0527315	-0.0480657	-0.056091	-0.0586422	-0.0813313	-0.0867409	-0.113921	-0.17207	-0.259746	-0.158851	-0.0578413	-0.0504469	-0.0324631	-0.071628	-0.0796244	-0.185263	0	0	0	0	0	0	0	0	0	0	0	0	0	0	0	0	0	0
0	0	0	0	0	0	0	0	0	0	0	0	0	0	0.0168703	-0.0385177	-0.0375737	-0.0515468	-0.0425124	-0.0298448	-0.0271614	-0.0712524	-0.0899645	-0.131043	-0.190784	-0.209124	-0.172293	-0.0389344	-0.0241952	-0.0980296	-0.09679	-0.12239	0	0	0	0	0	0	0	0	0	0	0	0	0	0	0	0	0	0
0	0	0	0	0	0	0	0	0	0	0	0	0	0	0.0105005	-0.0432646	-0.037041	-0.0483925	-0.0697791	-0.0450484	-0.0243347	-0.0487751	-0.0839602	-0.086591	-0.188227	-0.218898	-0.150967	-0.0332705	-0.0262454	-0.0825098	-0.138355	-0.170875	0	0	0	0	0	0	0	0	0	0	0	0	0	0	0	0	0	0
0	0	0	0	0	0	0	0	0	0	0	0	0	0.0877288	0.0103431	-0.0298861	-0.0175475	-0.0374156	-0.0560397	-0.0469733	-0.0162839	-0.0150749	-0.0630753	-0.0810864	-0.112021	-0.172234	-0.123982	-0.00767086	-0.00485617	-0.0453317	-0.0899902	-0.0986314	-0.0278921	0	0	0	0	0	0	0	0	0	0	0	0	0	0	0	0	0
0	0	0	0	0	0	0	0	0	0	0	0	0	0	0.0133867	-0.0240793	-0.0190339	-0.0323654	-0.0451948	-0.0621548	-0.0309666	-0.00478863	-0.0349603	-0.0946532	-0.0861284	-0.118807	-0.0819586	-0.00468289	0.00758065	-0.0378489	-0.0450876	-0.0443693	-0.00871228	0	0	0	0	0	0	0	0	0	0	0	0	0	0	0	0	0
0	0	0	0	0	0	0	0	0	0	0	0	0	0	0.0155132	-0.0289774	-0.0185349	-0.0153792	-0.0288001	-0.0512328	-0.062519	-0.0257937	0.00336323	-0.0349889	-0.0862534	-0.0390229	-0.00897481	0.00675948	0.00208175	-0.0272885	-0.0234421	-0.0119597	0.0209536	0	0	0	0	0	0	0	0	0	0	0	0	0	0	0	0	0
0	0	0	0	0	0	0	0	0	0	0	0	0	0	0.0301721	-0.00398871	0.00611543	0.00383782	-0.00600443	-0.0255029	-0.0498245	-0.0449806	-0.011613	-0.00388553	-0.0403773	-0.198134	-0.0722851	0.0138479	0.0141601	8.58437e-05	-0.00378851	0.0234888	0.0293152	0.0312028	0	0	0	0	0	0	0	0	0	0	0	0	0	0	0	0
0	0	0	0	0	0	0	0	0	0	0	0	0	0	0.0369667	0.00559342	0.0337595	0.0375796	0.0270963	0.00698958	-0.0135341	-0.0299044	-0.0308214	-0.0170649	-0.0124362	-0.0038812	-0.0180119	0.0117081	-0.0110721	-0.00503534	0.0407779	0.0557654	0.0383982	0.0414672	0	0	0	0	0	0	0	0	0	0	0	0	0	0	0	0
0	0	0	0	0	0	0	0	0	0	0	0	0	0	0.0382009	0.0282719	0.0607327	0.0698101	0.0560465	0.0483552	0.0179394	0.00483592	0.00548847	0.00628505	0.0141211	0.0241907	0.0282816	0.0648946	0.0933003	0.105755	0.123291	0.108811	0.0658141	0	0	0	0	0	0	0	0	0	0	0	0	0	0	0	0	0
0	0	0	0	0	0	0	0	0	0	0	0	0	0	0.12532	0.143941	0.195174	0.185128	0.159525	0.136047	0.113928	0.115764	0.122107	0.123252	0.136092	0.186295	0.236968	0.278871	0.272657	0.227543	0.194233	0.139557	0	0	0	0	0	0	0	0	0	0	0	0	0	0	0	0	0	0
0	0	0	0	0	0	0	0	0	0	0	0	0	0	0	0.17574	0.208816	0.220202	0.214396	0.211534	0.193024	0.185791	0.183617	0.178418	0.188403	0.226683	0.239104	0.236728	0.22623	0.177167	0.155868	0	0	0	0	0	0	0	0	0	0	0	0	0	0	0	0	0	0	0
0	0	0	0	0	0	0	0	0	0	0	0	0	0	0	0.1772	0.210721	0.230785	0.241193	0.261406	0.246994	0.239585	0.217565	0.173511	0.160583	0.182325	0.191475	0.17952	0.155275	0.128234	0	0	0	0	0	0	0	0	0	0	0	0	0	0	0	0	0	0	0	0
0	0	0	0	0	0	0	0	0	0	0	0	0	0	0	0	0.200388	0.220005	0.249615	0.26635	0.267519	0.238651	0.20285	0.128532	0.116694	0.125206	0.141252	0	0	0	0	0	0	0	0	0	0	0	0	0	0	0	0	0	0	0	0	0	0	0
0	0	0	0	0	0	0	0	0	0	0	0	0	0	0	0	0	0	0	0	0	0	0	0	0	0	0	0	0	0	0	0	0	0	0	0	0	0	0	0	0	0	0	0	0	0	0	0	0	0
0	0	0	0	0	0	0	0	0	0	0	0	0	0	0	0	0	0	0	0	0	0	0	0	0	0	0	0	0	0	0	0	0	0	0	0	0	0	0	0	0	0	0	0	0	0	0	0	0	0
0	0	0	0	0	0	0	0	0	0	0	0	0	0	0	0	0	0	0	0	0	0	0	0	0	0	0	0	0	0	0	0	0	0	0	0	0	0	0	0	0	0	0	0	0	0	0	0	0	0
0	0	0	0	0	0	0	0	0	0	0	0	0	0	0	0	0	0	0	0	0	0	0	0	0	0	0	0	0	0	0	0	0	0	0	0	0	0	0	0	0	0	0	0	0	0	0	0	0	0
0	0	0	0	0	0	0	0	0	0	0	0	0	0	0	0	0	0	0	0	0	0	0	0	0	0	0	0	0	0	0	0	0	0	0	0	0	0	0	0	0	0	0	0	0	0	0	0	0	0
0	0	0	0	0	0	0	0	0	0	0	0	0	0	0	0	0	0	0	0	0	0	0	0	0	0	0	0	0	0	0	0	0	0	0	0	0	0	0	0	0	0	0	0	0	0	0	0	0	0
0	0	0	0	0	0	0	0	0	0	0	0	0	0	0	0	0	0	0	0	0	0	0	0	0	0	0	0	0	0	0	0	0	0	0	0	0	0	0	0	0	0	0	0	0	0	0	0	0	0
0	0	0	0	0	0	0	0	0	0	0	0	0	0	0	0	0	0	0	0	0	0	0	0	0	0	0	0	0	0	0	0	0	0	0	0	0	0	0	0	0	0	0	0	0	0	0	0	0	0
0	0	0	0	0	0	0	0	0	0	0	0	0	0	0	0	0	0	0	0	0	0	0	0	0	0	0	0	0	0	0	0	0	0	0	0	0	0	0	0	0	0	0	0	0	0	0	0	0	0
0	0	0	0	0	0	0	0	0	0	0	0	0	0	0	0	0	0	0	0	0	0	0	0	0	0	0	0	0	0	0	0	0	0	0	0	0	0	0	0	0	0	0	0	0	0	0	0	0	0
0	0	0	0	0	0	0	0	0	0	0	0	0	0	0	0	0	0	0	0	0	0	0	0	0	0	0	0	0	0	0	0	0	0	0	0	0	0	0	0	0	0	0	0	0	0	0	0	0	0
0	0	0	0	0	0	0	0	0	0	0	0	0	0	0	0	0	0	0	0	0	0	0	0	0	0	0	0	0	0	0	0	0	0	0	0	0	0	0	0	0	0	0	0	0	0	0	0	0	0
0	0	0	0	0	0	0	0	0	0	0	0	0	0	0	0	0	0	0	0	0	0	0	0	0	0	0	0	0	0	0	0	0	0	0	0	0	0	0	0	0	0	0	0	0	0	0	0	0	0
0	0	0	0	0	0	0	0	0	0	0	0	0	0	0	0	0	0	0	0	0	0	0	0	0	0	0	0	0	0	0	0	0	0	0	0	0	0	0	0	0	0	0	0	0	0	0	0	0	0
0	0	0	0	0	0	0	0	0	0	0	0	0	0	0	0	0	0	0	0	0	0	0	0	0	0	0	0	0	0	0	0	0	0	0	0	0	0	0	0	0	0	0	0	0	0	0	0	0	0
0	0	0	0	0	0	0	0	0	0	0	0	0	0	0	0	0	0	0	0	0	0	0	0	0	0	0	0	0	0	0	0	0	0	0	0	0	0	0	0	0	0	0	0	0	0	0	0	0	0
0	0	0	0	0	0	0	0	0	0	0	0	0	0	0	0	0	0	0	0	0	0	0	0	0	0	0	0	0	0	0	0	0	0	0	0	0	0	0	0	0	0	0	0	0	0	0	0	0	0
0	0	0	0	0	0	0	0	0	0	0	0	0	0	0	0	0	0	0	0	0	0	0	0	0	0	0	0	0	0	0	0	0	0	0	0	0	0	0	0	0	0	0	0	0	0	0	0	0	0
0	0	0	0	0	0	0	0	0	0	0	0	0	0	0	0	0	0	0	0	0	0	0	0	0	0	0	0	0	0	0	0	0	0	0	0	0	0	0	0	0	0	0	0	0	0	0	0	0	0
0	0	0	0	0	0	0	0	0	0	0	0	0	0	0	0	0	0	0	0	0	0	0	0	0	0	0	0	0	0	0	0	0	0	0	0	0	0	0	0	0	0	0	0	0	0	0	0	0	0
0	0	0	0	0	0	0	0	0	0	0	0	0	0	0	0	0	0	0	0	0	0	0	0	0	0	0	0	0	0	0	0	0	0	0	0	0	0	0	0	0	0	0	0	0	0	0	0	0	0
0	0	0	0	0	0	0	0	0	0	0	0	0	0	0	0	0	0	0	0	0	0	0	0	0	0	0	0	0	0	0	0	0	0	0	0	0	0	0	0	0	0	0	0	0	0	0	0	0	0
0	0	0	0	0	0	0	0	0	0	0	0	0	0	0	0	0	0	0	0	0	0	0	0	0	0	0	0	0	0	0	0	0	0	0	0	0	0	0	0	0	0	0	0	0	0	0	0	0	0
0	0	0	0	0	0	0	0	0	0	0	0	0	0	0	0	0	0	0	0	0	0	0	0	0	0	0	0	0	0	0	0	0	0	0	0	0	0	0	0	0	0	0	0	0	0	0	0	0	0
0	0	0	0	0	0	0	0	0	0	0	0	0	0	0	0	0	0	0	0	0	0	0	0	0	0	0	0	0	0	0	0	0	0	0	0	0	0	0	0	0	0	0	0	0	0	0	0	0	0
0	0	0	0	0	0	0	0	0	0	0	0	0	0	0	0	0	0	0	0	0	0	0	0	0	0	0	-0.0236156	-0.113912	0	0	0	0	0	0	0	0	0	0	0	0	0	0	0	0	0	0	0	0	0
0	0	0	0	0	0	0	0	0	0	0	0	0	0	0	0	0	0	0	0	0	0	0	0	0	0.0678523	-0.0506187	-0.103207	-0.178466	-0.170051	0	0	0	0	0	0	0	0	0	0	0	0	0	0	0	0	0	0	0	0
0	0	0	0	0	0	0	0	0	0	0	0	0	0	0	0	0	0	0	0	0	0	0	0	0.0174551	-0.00132191	-0.04801	-0.0694453	-0.116603	-0.155716	-0.100516	0	0	0	0	0	0	0	0	0	0	0	0	0	0	0	0	0	0	0
0	0	0	0	0	0	0	0	0	0	0	0	0	0	0	0	0	0	0	0.0768204	0.0527334	0.0594284	0.0596398	0.0688574	0.00203666	-0.063578	-0.0739326	-0.0590238	-0.056608	-0.0830396	-0.0541536	0.0146557	0	0	0	0	0	0	0	0	0	0	0	0	0	0	0	0	0	0
0	0	0	0	0	0	0	0	0	0	0	0	0	0	0	0	0	0	0.0546522	0.0242941	0.0090883	-0.0109365	-0.0042504	0.0636968	0.0216231	-0.0293795	-0.0435227	-0.00955879	0.0161075	0.0197301	0.0571825	0.054804	0.0147446	0	0	0	0	0	0	0	0	0	0	0	0	0	0	0	0	0
0	0	0	0	0	0	0	0	0	0	0	0	0	0	0	0	0	0.0784291	0.040664	0.0450605	0.0363961	0.0769816	0.0976771	0.102851	0.0573915	0.0354886	0.0345661	0.0525327	0.0487733	0.0665047	0.0837308	0.0596831	0.0180069	0	0	0	0	0	0	0	0	0	0	0	0	0	0	0	0	0
0	0	0	0	0	0	0	0	0	0	0	0	0	0	0	0	0	0.0619116	0.0241737	0.0390438	0.0789122	0.0886284	0.14775	0.128405	0.101488	0.108364	0.114674	0.125261	0.112679	0.110172	0.0882637	0.0127636	-0.0109715	0	0	0	0	0	0	0	0	0	0	0	0	0	0	0	0	0
0	0	0	0	0	0	0	0	0	0	0	0	0	0	0	0	0.071734	0.042266	-0.0388001	0.00775063	0.0563104	0.098493	0.175055	0.143179	0.153444	0.115636	0.118669	0.10978	0.130881	0.111019	0.041843	-0.121687	-0.147255	-0.0790512	0	0	0	0	0	0	0	0	0	0	0	0	0	0	0	0
0	0	0	0	0	0	0	0	0	0	0	0	0	0	0	0	0.0730255	0.0174389	-0.0393191	-0.00905475	0.00592518	0.0454868	0.124587	0.13064	0.122027	0.0678438	0.080599	0.112109	0.115852	0.0547131	-0.000129869	-0.0351624	-0.107171	-0.0680953	0	0	0	0	0	0	0	0	0	0	0	0	0	0	0	0
0	0	0	0	0	0	0	0	0	0	0	0	0	0	0	0	0.0522952	0.0136376	-0.0519783	-0.0562766	-0.00577308	0.0609876	0.116905	0.131991	0.147188	0.066899	0.0983631	0.0926537	0.0791795	-0.0287394	-0.0521074	-0.0301634	-0.110641	-0.0787053	0	0	0	0	0	0	0	0	0	0	0	0	0	0	0	0
0	0	0	0	0	0	0	0	0	0	0	0	0	0	0	0	0.0491162	0.00267438	-0.0356278	-0.0160576	-0.027418	0.0184224	0.13396	0.167719	0.159678	0.145136	0.153815	0.131139	0.0167703	-0.0936325	-0.0868655	-0.0605796	-0.0778929	-0.0557667	-0.0376885	0	0	0	0	0	0	0	0	0	0	0	0	0	0	0
0	0	0	0	0	0	0	0	0	0	0	0	0	0	0	0.0526536	0.0563071	0.0335874	-0.017309	-0.018167	-0.0773428	-0.060625	0.0548593	0.150612	0.154702	0.12306	0.0341125	0.0335473	-0.0213554	-0.0807277	-0.086589	-0.0356052	-0.0495932	-0.0344769	-0.0309109	0	0	0	0	0	0	0	0	0	0	0	0	0	0	0
0	0	0	0	0	0	0	0	0	0	0	0	0	0	0	0.263596	0.125749	0.0306341	-0.035113	-0.128534	-0.152533	-0.0656778	-0.14519	-0.381781	-0.443063	-0.429598	-0.446401	-0.229806	-0.245019	-0.260189	-0.207413	-0.150756	-0.180799	-0.133872	-0.0893539	0	0	0	0	0	0	0	0	0	0	0	0	0	0	0
0	0	0	0	0	0	0	0	0	0	0	0	0	0	0.0364181	0.0337827	0.0560973	0.0513323	0.0249235	0.0346573	0.0343219	0.030596	-0.0171033	-0.0242028	-0.0938253	-0.0502449	-0.0266427	0.000882432	-0.015003	-0.0502051	-0.0340117	-0.0248023	-0.0343097	-0.012272	-0.0149193	0	0	0	0	0	0	0	0	0	0	0	0	0	0	0
0	0	0	0	0	0	0	0	0	0	0	0	0	0.0711028	0.029268	0.0344502	0.0572405	0.0593425	0.037683	0.0389851	0.0250342	0.0283922	0.0289469	-0.00917866	-0.0411053	-0.020749	-0.00475605	0.0267968	0.0249244	-0.00176048	-0.0246188	-0.0286384	-0.0284649	-0.00117146	-0.00772954	0	0	0	0	0	0	0	0	0	0	0	0	0	0	0
0	0	0	0	0	0	0	0	0	0	0	0	0	0.0529711	0.0202696	0.0331809	0.0601807	0.0628489	0.0447389	0.0382155	0.0284865	0.0300527	0.0217714	0.00524527	-0.0297956	-0.00717643	0.00806916	0.0258015	0.0241018	0.00024005	-0.0115687	-0.0265247	-0.0287847	-0.00970661	-0.010287	0	0	0	0	0	0	0	0	0	0	0	0	0	0	0
0	0	0	0	0	0	0	0	0	0	0	0	0	0.0450039	0.0106769	0.0338058	0.0643481	0.0560692	0.0466744	0.0420547	0.020761	0.0240506	0.0217384	0.0136558	-0.00430654	0.00310127	0.00849245	0.0261808	0.0263548	0.00753356	0.00788697	-0.0294098	-0.034376	-0.011934	-0.0105651	0	0	0	0	0	0	0	0	0	0	0	0	0	0	0
0	0	0	0	0	0	0	0	0	0	0	0	0	0.0507731	0.0323939	0.0421941	0.0744506	0.0647094	0.0564642	0.04761	0.0325885	0.0354736	0.0328781	0.0289613	0.0185163	0.0231113	0.0294949	0.0287746	0.0271532	0.0062114	0.0179511	-0.0148097	-0.0322748	-0.0118453	-0.00472332	0	0	0	0	0	0	0	0	0	0	0	0	0	0	0
0	0	0	0	0	0	0	0	0	0	0	0	0	0.0610999	0.0306259	0.0454848	0.0748183	0.0656151	0.0464046	0.0388809	0.0283279	0.0360088	0.0317447	0.0305612	0.0275328	0.0193537	0.0285154	0.0287797	0.020587	-0.000257931	0.0133608	0.00597606	-0.0389242	-0.0128805	0.000356036	0	0	0	0	0	0	0	0	0	0	0	0	0	0	0
0	0	0	0	0	0	0	0	0	0	0	0	0	0.0621835	0.0442635	0.0566796	0.0818196	0.0652782	0.0539851	0.0430264	0.0229818	0.0233341	0.0254507	0.026796	0.0290941	0.0254817	0.0273825	0.0274008	0.0114466	-0.00193325	0.00739286	0.0123869	-0.0367544	-0.0198334	-0.00595859	0	0	0	0	0	0	0	0	0	0	0	0	0	0	0
0	0	0	0	0	0	0	0	0	0	0	0	0	0.085055	0.0359712	0.054486	0.0781323	0.0685391	0.0496144	0.0416255	0.0211172	0.0197913	0.0164464	0.0172238	0.0221503	0.0162629	0.00579801	0.0192159	0.0044721	-0.00710361	0.00596846	0.00898873	-0.0102213	-0.0233857	-0.00511571	0	0	0	0	0	0	0	0	0	0	0	0	0	0	0
0	0	0	0	0	0	0	0	0	0	0	0	0	0	0.0772599	0.0661976	0.0864216	0.0662331	0.0479484	0.0315378	0.0180927	0.0171131	0.0164717	0.0123796	0.0105918	0.00552401	0.0103032	0.0110355	-3.94571e-05	-0.0312287	-0.0117189	-0.0037641	-0.0158662	-0.0196982	0	0	0	0	0	0	0	0	0	0	0	0	0	0	0	0
0	0	0	0	0	0	0	0	0	0	0	0	0	0	0	0.0936248	0.0919902	0.0677474	0.0383474	0.0320066	0.0024272	-0.00289533	-0.0116461	-0.0133487	-0.0277356	-0.0336323	-0.0587437	-0.050667	-0.0553651	-0.0521628	-0.0205004	0.00810659	-0.00103275	0	0	0	0	0	0	0	0	0	0	0	0	0	0	0	0	0
0	0	0	0	0	0	0	0	0	0	0	0	0	0	0	0	0	0	0	0	0.0257475	0.0137057	0.00385051	-0.00779761	-0.0294903	-0.0245363	-0.0127032	-6.74209e-05	0	0	0	0	0	0	0	0	0	0	0	0	0	0	0	0	0	0	0	0	0	0
0	0	0	0	0	0	0	0	0	0	0	0	0	0	0	0	0	0	0	0	0	0	0	0	0	0	0	0	0	0	0	0	0	0	0	0	0	0	0	0	0	0	0	0	0	0	0	0	0	0
0	0	0	0	0	0	0	0	0	0	0	0	0	0	0	0	0	0	0	0	0	0	0	0	0	0	0	0	0	0	0	0	0	0	0	0	0	0	0	0	0	0	0	0	0	0	0	0	0	0
0	0	0	0	0	0	0	0	0	0	0	0	0	0	0	0	0	0	0	0	0	0	0	0	0	0	0	0	0	0	0	0	0	0	0	0	0	0	0	0	0	0	0	0	0	0	0	0	0	0
0	0	0	0	0	0	0	0	0	0	0	0	0	0	0	0	0	0	0	0	0	0	0	0	0	0	0	0	0	0	0	0	0	0	0	0	0	0	0	0	0	0	0	0	0	0	0	0	0	0
0	0	0	0	0	0	0	0	0	0	0	0	0	0	0	0	0	0	0	0	0	0	0	0	0	0	0	0	0	0	0	0	0	0	0	0	0	0	0	0	0	0	0	0	0	0	0	0	0	0
0	0	0	0	0	0	0	0	0	0	0	0	0	0	0	0	0	0	0	0	0	0	0	0	0	0	0	0	0	0	0	0	0	0	0	0	0	0	0	0	0	0	0	0	0	0	0	0	0	0
0	0	0	0	0	0	0	0	0	0	0	0	0	0	0	0	0	0	0	0	0	0	0	0	0	0	0	0	0	0	0	0	0	0	0	0	0	0	0	0	0	0	0	0	0	0	0	0	0	0
0	0	0	0	0	0	0	0	0	0	0	0	0	0	0	0	0	0	0	0	0	0	0	0	0	0	0	0	0	0	0	0	0	0	0	0	0	0	0	0	0	0	0	0	0	0	0	0	0	0
0	0	0	0	0	0	0	0	0	0	0	0	0	0	0	0	0	0	0	0	0	0	0	0	0	0	0	0	0	0	0	0	0	0	0	0	0	0	0	0	0	0	0	0	0	0	0	0	0	0
0	0	0	0	0	0	0	0	0	0	0	0	0	0	0	0	0	0	0	0	0	0	0	0	0	0	0	0	0	0	0	0	0	0	0	0	0	0	0	0	0	0	0	0	0	0	0	0	0	0
0	0	0	0	0	0	0	0	0	0	0	0	0	0	0	0	0	0	0	0	0	0	0	0	0	0	0	0	0	0	0	0	0	0	0	0	0	0	0	0	0	0	0	0	0	0	0	0	0	0
0	0	0	0	0	0	0	0	0	0	0	0	0	0	0	0	0	0	0	0	0	0	0	0	0	0	0	0	0	0	0	0	0	0	0	0	0	0	0	0	0	0	0	0	0	0	0	0	0	0
0	0	0	0	0	0	0	0	0	0	0	0	0	0	0	0	0	0	0	0	0	0	0	0	0	0	0	0	0	0	0	0	0	0	0	0	0	0	0	0	0	0	0	0	0	0	0	0	0	0
0	0	0	0	0	0	0	0	0	0	0	0	0	0	0	0	0	0	0	0	0	0	0	0	0	0	0	0	0	0	0	0	0	0	0	0	0	0	0	0	0	0	0	0	0	0	0	0	0	0
0	0	0	0	0	0	0	0	0	0	0	0	0	0	0	0	0	0	0	0	0	0	0	0	0	0	0	0	0	0	0	0	0	0	0	0	0	0	0	0	0	0	0	0	0	0	0	0	0	0
0	0	0	0	0	0	0	0	0	0	0	0	0	0	0	0	0	0	0	0	0	0	0	0	0	0	0	0	0	0	0	0	0	0	0	0	0	0	0	0	0	0	0	0	0	0	0	0	0	0
0	0	0	0	0	0	0	0	0	0	0	0	0	0	0	0	0	0	0	0	0	0	0	0	0	0	0	0	0	0	0	0	0	0	0	0	0	0	0	0	0	0	0	0	0	0	0	0	0	0
0	0	0	0	0	0	0	0	0	0	0	0	0	0	0	0	0	0	0	0	0	0	0	0	0	0	0	0	0	0	0	0	0	0	0	0	0	0	0	0	0	0	0	0	0	0	0	0	0	0
0	0	0	0	0	0	0	0	0	0	0	0	0	0	0	0	0	0	0	0	0	0	0	0	0	0	0	0	0	0	0	0	0	0	0	0	0	0	0	0	0	0	0	0	0	0	0	0	0	0
0	0	0	0	0	0	0	0	0	0	0	0	0	0	0	0	0	0	0	0	0	0	0	0	0	0	0	0	0	0	0	0	0	0	0	0	0	0	0	0	0	0	0	0	0	0	0	0	0	0
0	0	0	0	0	0	0	0	0	0	0	0	0	0	0	0	0	0	0	0	0	0	0	0	0	0	0	0	0	0	0	0	0	0	0	0	0	0	0	0	0	0	0	0	0	0	0	0	0	0
0	0	0	0	0	0	0	0	0	0	0	0	0	0	0	0	0	0	0	0	0	0	0	0	0	0	0	0	0	0	0	0	0	0	0	0	0	0	0	0	0	0	0	0	0	0	0	0	0	0
0	0	0	0	0	0	0	0	0	0	0	0	0	0	0	0	0	0	0	0	0	0	0	0	0	0	0	0	0	0	0	0	0	0	0	0	0	0	0	0	0	0	0	0	0	0	0	0	0	0
0	0	0	0	0	0	0	0	0	0	0	0	0	0	0	0	0	0	0	0	0	0	0	0	0	0	0	0	0	0	0	0	0	0	0	0	0	0	0	0	0	0	0	0	0	0	0	0	0	0
0	0	0	0	0	0	0	0	0	0	0	0	0	0	0	0	0	0	0	0	0	0	0	0	0	0	0	0	0	0	0	0	0	0	0	0	0	0	0	0	0	0	0	0	0	0	0	0	0	0
0	0	0	0	0	0	0	0	0	0	0	0	0	0	0	0	0	0	0	0	0	0	0	0	0	0	0	0	0	0	0	0	0	0	0	0	0	0	0	0	0	0	0	0	0	0	0	0	0	0
0	0	0	0	0	0	0	0	0	0	0	0	0	0	0	0	0	0	0	0	0	0	0	0	0	0	0	0	0	0	0	0	0	0	0	0	0	0	0	0	0	0	0	0	0	0	0	0	0	0
0	0	0	0	0	0	0	0	0	0	0	0	0	0	0	0	0	0	0	0	0	0	0	0	0	0	0	0	0	0	0	0	0	0	0	0	0	0	0	0	0	0	0	0	0	0	0	0	0	0
0	0	0	0	0	0	0	0	0	0	0	0	0	0	0	0	0	0	0	0	0	0	0	0	0	0	0	0	0	0	0	0	0	0	0	0	0	0	0	0	0	0	0	0	0	0	0	0	0	0
0	0	0	0	0	0	0	0	0	0	0	0	0	0	0	0	0	0	0	0	0	0	0	0	0	0	0.0954185	0.165833	0.240467	0.212183	0.196318	0.18745	0.212053	0.272353	0.295789	0	0	0	0	0	0	0	0	0	0	0	0	0	0	0
0	0	0	0	0	0	0	0	0	0	0	0	0	0	0	0	0	0	0	0	0	0	0	0	0.00949872	0.0123038	0.0438244	0.057982	0.0543366	0.0504456	0.0826666	0.120017	0.153853	0.190933	0.173886	0.136202	0	0	0	0	0	0	0	0	0	0	0	0	0	0
0	0	0	0	0	0	0	0	0	0	0	0	0	0	0	0	0	0	0	0	0	0	0.0374175	0.00898057	0.0203014	0.0480615	0.0417612	0.0286699	0.010328	-0.0570454	-0.0390558	0.0267483	0.110277	0.194539	0.229841	0.195279	0.151302	0.0886471	0	0	0	0	0	0	0	0	0	0	0	0
0	0	0	0	0	0	0	0	0	0	0	0	0	0	0	0	0	0	0	0	0	0.0275502	0.0130676	0.0381016	0.0438549	0.0323142	0.00655239	0.000845548	-0.00284309	-0.0291865	-0.0539113	-0.0554333	-0.0374416	0.0433571	0.0963029	0.145441	0.196697	0.155213	0.112115	0	0	0	0	0	0	0	0	0	0	0
0	0	0	0	0	0	0	0	0	0	0	0	0	0	0	0	0	0	0	0	0.0496582	0.0463045	0.0360873	0.0208352	0.00610098	-0.000569665	-0.00821718	0.0108756	0.00440026	-0.00721809	0.0144604	0.00110389	-0.0425595	0.00236024	0.0444348	0.0771728	0.16909	0.172214	0.13222	0.0974705	0	0	0	0	0	0	0	0	0	0
0	0	0	0	0	0	0	0	0	0	0	0	0	0	0	0	0	0	0	0.061094	0.0665679	0.0212658	-0.00535281	-0.0133808	0.0177004	-0.0356243	-0.00546093	0.0387192	0.0320562	0.0132349	0.0250714	0.0268857	-0.0564121	-0.0398416	0.00254915	0.0756899	0.148344	0.213042	0.173253	0.123721	0	0	0	0	0	0	0	0	0	0
0	0	0	0	0	0	0	0	0	0	0	0	0	0	0	0	0	0	0.0621641	0.0743968	0.0193286	-0.0340287	-0.0120031	-0.0293979	-0.00603199	0.0197466	0.0202133	0.0108193	0.0300385	0.010278	0.0206377	0.040783	-0.0334416	-0.0367927	-0.0265752	0.04292	0.133814	0.206318	0.204259	0.142316	0	0	0	0	0	0	0	0	0	0
0	0	0	0	0	0	0	0	0	0	0	0	0	0	0	0	0	0.0832812	0.0287919	0.0413912	-0.00288801	-0.0309995	-0.0265052	-0.0569231	-0.0276758	0.00235205	0.00802502	0.0124019	-0.0286022	0.0165847	0.0228141	0.0411426	-0.0252749	-0.0399344	-0.0148057	0.0591287	0.128488	0.187091	0.210877	0.149391	0.101256	0	0	0	0	0	0	0	0	0
0	0	0	0	0	0	0	0	0	0	0	0	0	0	0	0	0.109892	0.0216562	0.0425908	0.00832015	-0.000178224	-0.0190891	0.00194039	-0.0158991	-0.0233215	-0.0288073	-0.0283769	-0.00944917	0.00256131	0.0100156	0.034786	0.0160767	-0.0316645	-0.01563	0.00901076	0.0588534	0.101085	0.152296	0.167412	0.143838	0.0608799	0	0	0	0	0	0	0	0	0
0	0	0	0	0	0	0	0	0	0	0	0	0	0	0	0.0929628	0.0559694	0.0160305	-0.00428276	-0.0520082	-0.0634616	-0.0383538	-0.0306222	-0.0449328	-0.01798	-0.000573072	0.000974723	0.0249844	0.0195491	0.0199067	0.0258748	-0.0103995	-0.0262203	0.00637535	0.0342391	0.0711564	0.105322	0.140931	0.140092	0.070231	0	0	0	0	0	0	0	0	0	0
0	0	0	0	0	0	0	0	0	0	0	0	0	0	0	0.0541144	-0.00774995	-0.0234027	-0.0283044	-0.0326791	-0.0471708	-0.0565157	-0.0481972	-0.0266791	-0.0358631	0.00424346	0.0018673	0.0184112	0.0277117	0.0236315	0.0216257	0.0089629	0.00479336	0.0372163	0.0556756	0.0758803	0.103395	0.0893997	0.0396073	0.030258	0	0	0	0	0	0	0	0	0	0
0	0	0	0	0	0	0	0	0	0	0	0	0	0	0	0.046853	0.0131782	-0.0218788	-0.0480236	-0.0449617	-0.0730704	-0.0726949	-0.058293	-0.00684004	-0.0394257	-0.0171135	-0.0115718	0.0176956	0.00953056	0.00902243	0.0314301	0.0236548	0.00739775	0.0228321	0.01153	0.0152669	0.00976339	0.00726667	0.0162992	0	0	0	0	0	0	0	0	0	0	0
0	0	0	0	0	0	0	0	0	0	0	0	0	0	0	0.0293246	-0.0246435	0.0188408	-0.00900932	-0.0609605	-0.0875274	-0.0920068	-0.072031	-0.0235049	-0.0199348	-0.017365	-0.00580862	0.00957417	-0.0279545	-0.0516065	-0.0553116	-0.0589027	-0.0714272	-0.0863005	-0.0852125	-0.0383531	-0.00520117	0.0078101	0.00722705	0	0	0	0	0	0	0	0	0	0	0
0	0	0	0	0	0	0	0	0	0	0	0	0	0	0	0	0.0303201	-0.0262824	-0.035418	-0.00779403	-0.0659119	-0.119931	-0.0960093	-0.075571	-0.0325101	-0.00682228	0.00266217	-0.0112629	-0.0384737	-0.100001	-0.0745483	-0.073101	-0.109853	-0.0897772	-0.0460454	-0.00900068	0.00294542	0	0	0	0	0	0	0	0	0	0	0	0	0
0	0	0	0	0	0	0	0	0	0	0	0	0	0	0	0	0.0748125	0.0262862	-0.0499648	-0.0276833	-0.101779	-0.184825	-0.0968278	-0.0800861	-0.0465771	0.00380955	-0.015228	-0.016442	-0.0870058	-0.135598	-0.118593	-0.117323	-0.106193	0	0	0	0	0	0	0	0	0	0	0	0	0	0	0	0	0
0	0	0	0	0	0	0	0	0	0	0	0	0	0	0	0	0	0.123657	0.0719081	-0.0444289	0.0136642	-0.118115	-0.0744368	-0.0479975	-0.0314751	-0.0451237	-0.101038	-0.142678	-0.157895	-0.135873	-0.068385	0	0	0	0	0	0	0	0	0	0	0	0	0	0	0	0	0	0	0
0	0	0	0	0	0	0	0	0	0	0	0	0	0	0	0	0	0	0	0	0.0150417	-0.08485	-0.0653934	-0.0450846	-0.0587481	-0.125888	-0.142025	0	0	0	0	0	0	0	0	0	0	0	0	0	0	0	0	0	0	0	0	0	0	0
0	0	0	0	0	0	0	0	0	0	0	0	0	0	0	0	0	0	0	0	0	0	0	0	0	0	0	0	0	0	0	0	0	0	0	0	0	0	0	0	0	0	0	0	0	0	0	0	0	0
0	0	0	0	0	0	0	0	0	0	0	0	0	0	0	0	0	0	0	0	0	0	0	0	0	0	0	0	0	0	0	0	0	0	0	0	0	0	0	0	0	0	0	0	0	0	0	0	0	0
0	0	0	0	0	0	0	0	0	0	0	0	0	0	0	0	0	0	0	0	0	0	0	0	0	0	0	0	0	0	0	0	0	0	0	0	0	0	0	0	0	0	0	0	0	0	0	0	0	0
0	0	0	0	0	0	0	0	0	0	0	0	0	0	0	0	0	0	0	0	0	0	0	0	0	0	0	0	0	0	0	0	0	0	0	0	0	0	0	0	0	0	0	0	0	0	0	0	0	0
0	0	0	0	0	0	0	0	0	0	0	0	0	0	0	0	0	0	0	0	0	0	0	0	0	0	0	0	0	0	0	0	0	0	0	0	0	0	0	0	0	0	0	0	0	0	0	0	0	0
0	0	0	0	0	0	0	0	0	0	0	0	0	0	0	0	0	0	0	0	0	0	0	0	0	0	0	0	0	0	0	0	0	0	0	0	0	0	0	0	0	0	0	0	0	0	0	0	0	0
0	0	0	0	0	0	0	0	0	0	0	0	0	0	0	0	0	0	0	0	0	0	0	0	0	0	0	0	0	0	0	0	0	0	0	0	0	0	0	0	0	0	0	0	0	0	0	0	0	0
0	0	0	0	0	0	0	0	0	0	0	0	0	0	0	0	0	0	0	0	0	0	0	0	0	0	0	0	0	0	0	0	0	0	0	0	0	0	0	0	0	0	0	0	0	0	0	0	0	0
0	0	0	0	0	0	0	0	0	0	0	0	0	0	0	0	0	0	0	0	0	0	0	0	0	0	0	0	0	0	0	0	0	0	0	0	0	0	0	0	0	0	0	0	0	0	0	0	0	0
0	0	0	0	0	0	0	0	0	0	0	0	0	0	0	0	0	0	0	0	0	0	0	0	0	0	0	0	0	0	0	0	0	0	0	0	0	0	0	0	0	0	0	0	0	0	0	0	0	0
0	0	0	0	0	0	0	0	0	0	0	0	0	0	0	0	0	0	0	0	0	0	0	0	0	0	0	0	0	0	0	0	0	0	0	0	0	0	0	0	0	0	0	0	0	0	0	0	0	0
0	0	0	0	0	0	0	0	0	0	0	0	0	0	0	0	0	0	0	0	0	0	0	0	0	0	0	0	0	0	0	0	0	0	0	0	0	0	0	0	0	0	0	0	0	0	0	0	0	0
0	0	0	0	0	0	0	0	0	0	0	0	0	0	0	0	0	0	0	0	0	0	0	0	0	0	0	0	0	0	0	0	0	0	0	0	0	0	0	0	0	0	0	0	0	0	0	0	0	0
0	0	0	0	0	0	0	0	0	0	0	0	0	0	0	0	0	0	0	0	0	0	0	0	0	0	0	0	0	0	0	0	0	0	0	0	0	0	0	0	0	0	0	0	0	0	0	0	0	0
0	0	0	0	0	0	0	0	0	0	0	0	0	0	0	0	0	0	0	0	0	0	0	0	0	0	0	0	0	0	0	0	0	0	0	0	0	0	0	0	0	0	0	0	0	0	0	0	0	0
0	0	0	0	0	0	0	0	0	0	0	0	0	0	0	0	0	0	0	0	0	0	0	0	0	0	0	0	0	0	0	0	0	0	0	0	0	0	0	0	0	0	0	0	0	0	0	0	0	0
0	0	0	0	0	0	0	0	0	0	0	0	0	0	0	0	0	0	0	0	0	0	0	0	0	0	0	0	0	0	0	0	0	0	0	0	0	0	0	0	0	0	0	0	0	0	0	0	0	0
0	0	0	0	0	0	0	0	0	0	0	0	0	0	0	0	0	0	0	0	0	0	0	0	0	0	0	0	0	0	0	0	0	0	0	0	0	0	0	0	0	0	0	0	0	0	0	0	0	0
0	0	0	0	0	0	0	0	0	0	0	0	0	0	0	0	0	0	0	0	0	0	0	0	0	0	0	0	0	0	0	0	0	0	0	0	0	0	0	0	0	0	0	0	0	0	0	0	0	0
0	0	0	0	0	0	0	0	0	0	0	0	0	0	0	0	0	0	0	0	0	0	0	0	0	0	0	0	0	0	0	0	0	0	0	0	0	0	0	0	0	0	0	0	0	0	0	0	0	0
0	0	0	0	0	0	0	0	0	0	0	0	0	0	0	0	0	0	0	0	0	0	0	0	0	0	0	0	0	0	0	0	0	0	0	0	0	0	0	0	0	0	0	0	0	0	0	0	0	0
0	0	0	0	0	0	0	0	0	0	0	0	0	0	0	0	0	0	0	0.0114435	-0.139972	-0.241056	0	0	0	0	0	0	0	0	0	0	0	0	0	0	0	0	0	0	0	0	0	0	0	0	0	0	0	0
0	0	0	0	0	0	0	0	0	0	0	0	0	0	0	0	0	0	0	-0.0310618	-0.128977	-0.132041	-0.153958	0	0	0	0	0	0	0	0	0	0	0	0	0	0	0	0	0	0	0	0	0	0	0	0	0	0	0
0	0	0	0	0	0	0	0	0	0	0	0	0	0	0	0	0	0	0.0620052	-0.0275655	-0.105729	-0.106616	-0.131837	-0.128926	-0.115659	-0.0650726	-0.0605701	-0.00866284	-0.0106367	-0.0143194	-0.0152165	0	0	0	0	0	0	0	0	0	0	0	0	0	0	0	0	0	0	0
0	0	0	0	0	0	0	0	0	0	0	0	0	0	0	0	0	0.201602	0.0396038	-0.028883	-0.0693241	-0.0643536	-0.0995208	-0.140767	-0.101825	-0.10216	-0.0639396	-0.0105033	0.015801	-0.0169047	-0.0205942	0.00629773	0	0	0	0	0	0	0	0	0	0	0	0	0	0	0	0	0	0
0	0	0	0	0	0	0	0	0	0	0	0	0	0	0	0.0438126	0.0593014	0.0617176	-0.0311777	-0.104884	-0.106129	-0.130586	-0.134287	-0.0670735	-0.0220381	-0.0102776	0.0221364	0.0572913	-0.0202844	-0.0830609	-0.119106	-0.139166	-0.0777513	-0.0348218	0	0	0	0	0	0	0	0	0	0	0	0	0	0	0	0
0	0	0	0	0	0	0	0	0	0	0	0	0	0	0.00357939	-0.0105461	0.0581861	0.105738	-0.00333543	-0.0806612	-0.0912752	-0.0663305	-0.0780216	-0.059483	-0.0117426	0.0257512	0.0649479	0.0584673	-0.0200277	-0.0650832	-0.0629317	-0.0764414	-0.0768858	-0.00950277	0	0	0	0	0	0	0	0	0	0	0	0	0	0	0	0
0	0	0	0	0	0	0	0	0	0	0	0	0	0.0636718	-0.0442891	-0.0177045	0.0658775	0.124136	0.0448417	-0.0559053	-0.0967657	-0.0756002	-0.0528012	-0.0293922	0.0694744	0.117464	0.0843797	0.0326567	-0.0425614	-0.0705348	-0.0596952	-0.056042	-0.0777174	-0.0259206	-0.0263973	0	0	0	0	0	0	0	0	0	0	0	0	0	0	0
0	0	0	0	0	0	0	0	0	0	0	0	0	0	-0.0126698	-0.00182671	0.0962287	0.145211	0.103101	0.0190946	-0.0284598	-0.0212366	0.00521235	0.0248808	0.0824081	0.124494	0.0499887	-0.0259444	-0.0704779	-0.093879	-0.0668242	-0.0458942	-0.0632981	-0.0263966	-0.0167919	0	0	0	0	0	0	0	0	0	0	0	0	0	0	0
0	0	0	0	0	0	0	0	0	0	0	0	0	0.138004	0.0222411	0.0344154	0.0487798	0.0698867	0.162816	0.177368	0.132179	0.168043	0.145537	0.0470647	0.0416319	-0.085041	-0.199015	-0.137047	-0.114476	-0.087378	-0.0495378	-0.0491894	-0.0542238	-0.0171398	0.00389465	0	0	0	0	0	0	0	0	0	0	0	0	0	0	0
0	0	0	0	0	0	0	0	0	0	0	0	0	0.0156978	-0.0598158	-0.0541466	0.00259956	0.104774	0.0975776	0.0758405	0.0250519	0.0104311	-0.0198536	-0.0465641	-0.0740173	-0.0876461	-0.0884391	-0.0755559	-0.0893921	-0.0859116	-0.0534412	-0.0310641	-0.0403131	-0.0160139	-0.0139447	-0.0197751	0	0	0	0	0	0	0	0	0	0	0	0	0	0
0	0	0	0	0	0	0	0	0	0	0	0	0	0.0140412	-0.0767886	-0.0605971	-0.0324596	-0.00173567	-0.0338347	0.00998286	-0.0192987	-0.00651933	-0.00246556	-0.0302988	-0.0676521	-0.0919968	-0.0851588	-0.0686972	-0.0770648	-0.0698901	-0.0415033	-0.0228802	-0.0404373	-0.00930404	-0.00369091	-0.00217449	0	0	0	0	0	0	0	0	0	0	0	0	0	0
0	0	0	0	0	0	0	0	0	0	0	0	0.0733375	0.00300643	-0.0724852	-0.0814875	-0.0406505	-0.0256664	-0.0557963	-0.0398296	-0.0291333	-0.0188694	-0.0355999	-0.0554827	-0.0776988	-0.0772111	-0.0730476	-0.0830752	-0.0874245	-0.0789647	-0.0550679	-0.0315244	-0.034806	-0.0120672	5.35363e-05	0.00887704	0	0	0	0	0	0	0	0	0	0	0	0	0	0
0	0	0	0	0	0	0	0	0	0	0	0	0.0599557	-0.00552014	-0.0792774	-0.0887146	-0.0471954	-0.0319032	-0.0594577	-0.0328715	-0.0391956	-0.0523684	-0.0482398	-0.0601724	-0.0774123	-0.0789314	-0.0758349	-0.0742859	-0.0788287	-0.080355	-0.0507858	-0.0188193	-0.0174828	0.000994733	0.0070455	0.0110401	0	0	0	0	0	0	0	0	0	0	0	0	0	0
0	0	0	0	0	0	0	0	0	0	0	0	0.0500544	-0.00402299	-0.0621507	-0.0783911	-0.0547309	-0.0490503	-0.0596394	-0.0574146	-0.0642453	-0.0630875	-0.0660307	-0.0786189	-0.0960668	-0.0867805	-0.0741543	-0.0725415	-0.0722797	-0.0686229	-0.0488457	-0.0334916	-0.027448	0.00931851	0.0116816	0.0113392	0	0	0	0	0	0	0	0	0	0	0	0	0	0
0	0	0	0	0	0	0	0	0	0	0	0	0.0509074	-0.00308793	-0.063305	-0.0703806	-0.0481141	-0.0562442	-0.0550336	-0.0580844	-0.0668543	-0.0686582	-0.063059	-0.0712266	-0.0969834	-0.0829724	-0.079256	-0.0751354	-0.0677369	-0.0733208	-0.0449765	-0.0237998	-0.0253935	0.00397334	0.0165574	0.0193664	3.51716e-05	0	0	0	0	0	0	0	0	0	0	0	0	0
0	0	0	0	0	0	0	0	0	0	0	0	0.0713143	0.0203368	-0.0343997	-0.0449463	-0.0337681	-0.042848	-0.0556725	-0.0625567	-0.0698783	-0.0603119	-0.0852174	-0.0899368	-0.105744	-0.100276	-0.0807389	-0.0537888	-0.0530234	-0.0558446	-0.035774	-0.0188494	-0.0177554	0.0138287	0.0208844	0.020641	0	0	0	0	0	0	0	0	0	0	0	0	0	0
0	0	0	0	0	0	0	0	0	0	0	0	0.112632	0.0651884	-0.0183225	-0.0343248	-0.0204285	-0.0209734	-0.0309703	-0.0380464	-0.0606001	-0.0623192	-0.0424028	-0.0491506	-0.0794685	-0.09408	-0.0916067	-0.0520798	-0.053685	-0.0578732	-0.0256928	-0.00684309	-0.0182513	0.000549286	-0.00701481	-0.0212706	0	0	0	0	0	0	0	0	0	0	0	0	0	0
0	0	0	0	0	0	0	0	0	0	0	0	0.048977	-0.00124935	-0.0220973	0.00113222	0.0165054	0.00325121	-0.00189762	-0.0118423	-0.0202291	-0.0193914	-0.0278339	-0.0252821	-0.0190391	-0.00943607	-0.00737546	0.0108546	0.00678526	-0.00375946	0.0189202	0.0304793	0.0161869	0.0359122	0.0249232	0	0	0	0	0	0	0	0	0	0	0	0	0	0	0
0	0	0	0	0	0	0	0	0	0	0	0	0.0614094	-0.00297205	-0.0147595	0.00483509	0.0218902	0.0113951	-0.00320023	-0.0027252	-0.0134629	-0.0214052	-0.0193595	-0.0238219	-0.0206718	-0.00851687	-0.0110377	0.00217412	0.00598029	0.00627016	0.0335652	0.0507921	0.03477	0.0489473	0.0228233	0	0	0	0	0	0	0	0	0	0	0	0	0	0	0
0	0	0	0	0	0	0	0	0	0	0	0	0.073734	0.0212482	0.00311218	0.00882722	0.0263837	0.0235079	0.00034815	-0.000273342	-0.0143964	-0.00955292	-0.0139952	-0.0218011	-0.0192814	-0.00729023	-0.0076957	0.014446	0.0175231	0.0111343	0.0334717	0.0485607	0.0358267	0.0518212	0	0	0	0	0	0	0	0	0	0	0	0	0	0	0	0
0	0	0	0	0	0	0	0	0	0	0	0	0	0.0357103	0.00486221	0.0134782	0.0370628	0.0209129	0.00642288	0.00970007	-0.0022064	-0.00691444	-0.00412713	-0.0146776	-0.00778248	0.00284486	0.00213671	0.0163601	0.0182117	0.0214522	0.0505144	0.0561828	0.0403426	0.0399272	0	0	0	0	0	0	0	0	0	0	0	0	0	0	0	0
0	0	0	0	0	0	0	0	0	0	0	0	0	0	0.0258807	0.0256469	0.0378861	0.0225836	0.0091984	0.0119538	0.0078432	0.00189084	0.000132714	-0.00264936	-0.00436006	0.00530153	0.0142164	0.0328723	0.0272656	0.0288517	0.0396876	0.0512911	0	0	0	0	0	0	0	0	0	0	0	0	0	0	0	0	0	0
0	0	0	0	0	0	0	0	0	0	0	0	0	0	0	0	0.0695548	0.0456938	0.0265941	-0.00672131	-0.0318651	-0.0444165	-0.0491955	-0.0300469	-0.0191802	-0.00264272	0.0210765	0.0458513	0.0562078	0	0	0	0	0	0	0	0	0	0	0	0	0	0	0	0	0	0	0	0	0
0	0	0	0	0	0	0	0	0	0	0	0	0	0	0	0	0	0.0862481	0.0689236	0.0693437	0.0605537	0.0556773	0.0497843	0.0392742	0.0464152	0.0609443	0.0620938	0	0	0	0	0	0	0	0	0	0	0	0	0	0	0	0	0	0	0	0	0	0	0
0	0	0	0	0	0	0	0	0	0	0	0	0	0	0	0	0	0	0	0	0	0	0	0	0	0	0	0	0	0	0	0	0	0	0	0	0	0	0	0	0	0	0	0	0	0	0	0	0	0
0	0	0	0	0	0	0	0	0	0	0	0	0	0	0	0	0	0	0	0	0	0	0	0	0	0	0	0	0	0	0	0	0	0	0	0	0	0	0	0	0	0	0	0	0	0	0	0	0	0
0	0	0	0	0	0	0	0	0	0	0	0	0	0	0	0	0	0	0	0	0	0	0	0	0	0	0	0	0	0	0	0	0	0	0	0	0	0	0	0	0	0	0	0	0	0	0	0	0	0
0	0	0	0	0	0	0	0	0	0	0	0	0	0	0	0	0	0	0	0	0	0	0	0	0	0	0	0	0	0	0	0	0	0	0	0	0	0	0	0	0	0	0	0	0	0	0	0	0	0
0	0	0	0	0	0	0	0	0	0	0	0	0	0	0	0	0	0	0	0	0	0	0	0	0	0	0	0	0	0	0	0	0	0	0	0	0	0	0	0	0	0	0	0	0	0	0	0	0	0
0	0	0	0	0	0	0	0	0	0	0	0	0	0	0	0	0	0	0	0	0	0	0	0	0	0	0	0	0	0	0	0	0	0	0	0	0	0	0	0	0	0	0	0	0	0	0	0	0	0
0	0	0	0	0	0	0	0	0	0	0	0	0	0	0	0	0	0	0	0	0	0	0	0	0	0	0	0	0	0	0	0	0	0	0	0	0	0	0	0	0	0	0	0	0	0	0	0	0	0
0	0	0	0	0	0	0	0	0	0	0	0	0	0	0	0	0	0	0	0	0	0	0	0	0	0	0	0	0	0	0	0	0	0	0	0	0	0	0	0	0	0	0	0	0	0	0	0	0	0
0	0	0	0	0	0	0	0	0	0	0	0	0	0	0	0	0	0	0	0	0	0	0	0	0	0	0	0	0	0	0	0	0	0	0	0	0	0	0	0	0	0	0	0	0	0	0	0	0	0
0	0	0	0	0	0	0	0	0	0	0	0	0	0	0	0	0	0	0	0	0	0	0	0	0	0	0	0	0	0	0	0	0	0	0	0	0	0	0	0	0	0	0	0	0	0	0	0	0	0
0	0	0	0	0	0	0	0	0	0	0	0	0	0	0	0	0	0	0	0	0	0	0	0	0	0	0	0	0	0	0	0	0	0	0	0	0	0	0	0	0	0	0	0	0	0	0	0	0	0
0	0	0	0	0	0	0	0	0	0	0	0	0	0	0	0	0	0	0	0	0	0	0	0	0	0	0	0	0	0	0	0	0	0	0	0	0	0	0	0	0	0	0	0	0	0	0	0	0	0
0	0	0	0	0	0	0	0	0	0	0	0	0	0	0	0	0	0	0	0	0	0	0	0	0	0	0	0	0	0	0	0	0	0	0	0	0	0	0	0	0	0	0	0	0	0	0	0	0	0
0	0	0	0	0	0	0	0	0	0	0	0	0	0	0	0	0	0	0	0	0	0	0	0	0	0	0	0	0	0	0	0	0	0	0	0	0	0	0	0	0	0	0	0	0	0	0	0	0	0
0	0	0	0	0	0	0	0	0	0	0	0	0	0	0	0	0	0	0	0	0	0	0	0	0	0	0	0	0	0	0	0	0	0	0	0	0	0	0	0	0	0	0	0	0	0	0	0	0	0
0	0	0	0	0	0	0	0	0	0	0	0	0	0	0	0	0	0	0	0	0	0	0	0	0	0	0	0	0	0	0	0	0	0	0	0	0	0	0	0	0	0	0	0	0	0	0	0	0	0
0	0	0	0	0	0	0	0	0	0	0	0	0	0	0	0	0	0	0	0	0	0	0	0	0	0	0	0	0	0	0	0	0	0	0	0	0	0	0	0	0	0	0	0	0	0	0	0	0	0
0	0	0	0	0	0	0	0	0	0	0	0	0	0	0	0	0	0	0	0	0	0	0	0	0	0	0	0	0	0	0	0	0	0	0	0	0	0	0	0	0	0	0	0	0	0	0	0	0	0
0	0	0	0	0	0	0	0	0	0	0	0	0	0	0	0	0	0	0	0	0	0	0	0	0	0	0	0	0	0	0	0	0	0	0	0	0	0	0	0	0	0	0	0	0	0	0	0	0	0
0	0	0	0	0	0	0	0	0	0	0	0	0	0	0	0	0	0	0	0	0	0	0	0	0	0	0	0	0	0	0	0	0	0	0	0	0	0	0	0	0	0	0	0	0	0	0	0	0	0
0	0	0	0	0	0	0	0	0	0	0	0	0	0	0	0	0	0	0	0	0	0	0	0	0	0	0	0	0	0	0	0	0	0	0	0	0	0	0	0	0	0	0	0	0	0	0	0	0	0
0	0	0	0	0	0	0	0	0	0	0	0	0	0	0	0	0	0	0	0	0	0	0	0	0	0	0	0	0	0	0	0	0	0	0	0	0	0	0	0	0	0	0	0	0	0	0	0	0	0
0	0	0	0	0	0	0	0	0	0	0	0	0	0	0	0	0	0	0	0	0	0	0	0	0	0	0	0	0	0	0	0	0	0	0	0	0	0	0	0	0	0	0	0	0	0	0	0	0	0
0	0	0	0	0	0	0	0	0	0	0	0	0	0	0	0	0	0	0	0	0	0	0	0	0	0	0	0	0	0	0	0	0	0	0	0	0	0	0	0	0	0	0	0	0	0	0	0	0	0
0	0	0	0	0	0	0	0	0	0	0	0	0	0	0	0	0	0	0	0	0	0	0	0	0	0	0	0	0	0	0	0	0	0	0	0	0	0	0	0	0	0	0	0	0	0	0	0	0	0
0	0	0	0	0	0	0	0	0	0	0	0	0	0	0	0	0	0	0	0	0	0	0	0	0	0	0	0	0	0	0	0	0	0	0	0	0	0	0	0	0	0	0	0	0	0	0	0	0	0
0	0	0	0	0	0	0	0	0	0	0	0	0	0	0	0	0	0	0	0	0	0	0	0	0	0	0	0	0	0	0	0	0	0	0	0	0	0	0	0	0	0	0	0	0	0	0	0	0	0
0	0	0	0	0	0	0	0	0	0	0	0	0	0	0	0	0	0	0	0	0	0	0	0	0	0	0	0	0	0	0	0	0	0.155653	0.225587	0.245679	0.264447	0.251901	0.231243	0.203769	0.21147	0.215542	0.251264	0	0	0	0	0	0	0
0	0	0	0	0	0	0	0	0	0	0	0	0	0	0	0	0	0	0	0	0	0	0	0	0	0	0	0	0	0	0.00491794	0.0206314	0.0413777	0.123237	0.184251	0.209046	0.222828	0.185367	0.140996	0.126049	0.0938091	0.0713992	0.134813	0.172875	0.204378	0.233094	0	0	0	0
0	0	0	0	0	0	0	0	0	0	0	0	0	0	0	0	0	0	0	0	0	0	0	0	0	0	0	0	0.0271068	-0.0113735	0.00576953	0.0195631	0.0295366	0.116672	0.184636	0.213485	0.214863	0.170741	0.142296	0.118673	0.099302	0.0887341	0.0997648	0.128258	0.169483	0.210102	0.229213	0.144658	0	0
0	0	0	0	0	0	0	0	0	0	0	0	0	0	0	0	0	0	0	0	0	0	0	0	0	0	0	0	-0.0080749	-0.0233002	-0.000948551	0.000658101	0.0200488	0.100851	0.141648	0.12877	0.118067	0.0795826	0.0516662	0.0464765	0.0717263	0.0928602	0.103176	0.130836	0.135528	0.174384	0.205168	0.197036	0	0
0	0	0	0	0	0	0	0	0	0	0	0	0	0	0	0	0	0	0	0	0	0	0	0	0	0	0	-0.00498438	-0.0219934	-0.0428143	-0.0096052	-0.00652911	-0.0443734	0.0291652	0.0379853	-0.00219079	0.00410725	-0.00690424	-0.0141472	-0.0116746	-0.000866174	0.0390673	0.0909521	0.136409	0.120576	0.149008	0.184964	0.183607	0.111987	0
0	0	0	0	0	0	0	0	0	0	0	0	0	0	0	0	0	0	0	0	0	0	0	0	0	0	-0.00184048	-0.0186813	-0.0315332	-0.0498564	-0.0266554	-0.0327194	-0.0398139	0.00373893	0.00740205	-0.0246654	-0.027639	-0.0621575	-0.0695409	0.00111767	-0.00202337	0.0131858	0.077278	0.129113	0.147093	0.140843	0.19259	0.19037	0.123203	0
0	0	0	0	0	0	0	0	0	0	0	0	0	0	0	0	0	0	0	0	0	0	0	0	0	0.0217996	-0.00806547	-0.0121202	-0.0455254	-0.0599654	-0.0366218	0.018147	0.0900224	0.0274037	-0.0574872	-0.0357008	-0.0324832	-0.0285742	-0.0302515	9.96934e-05	0.0105041	-0.0298972	0.00173089	0.0616001	0.133593	0.15853	0.203496	0.219551	0.163141	0.0934417
0	0	0	0	0	0	0	0	0	0	0	0	0	0	0	0	0	0	0	0	0	0	0	0	0.00493929	-0.0296688	-0.0438339	-0.0640724	-0.0756446	-0.0729668	-0.0410201	-0.0438982	-0.12465	-0.114079	-0.131544	-0.10187	-0.140234	-0.0638901	-0.0089765	0.00394107	0.00695813	-0.0216969	-0.00896491	0.0452681	0.0909881	0.153226	0.157723	0.148832	0.0962168	0.0456638
0	0	0	0	0	0	0	0	0	0	0	0	0	0	0	0	0	0	0	0	0	0	0	0.032481	-0.0187373	-0.0464261	-0.0740438	-0.0685804	-0.0534614	-0.0983233	-0.110616	-0.13388	-0.119687	-0.0878139	-0.0385772	-0.033063	-0.0308872	0.00512553	0.0152181	0.0151918	-0.00394981	-0.0369452	-0.0355458	-0.00943098	0.0135177	0.00211729	0.0425915	0.048665	0.0260716	0.00717772
0	0	0	0	0	0	0	0	0	0	0	0	0	0	0	0	0	0	0	0	0	0	0	0.0247405	-0.0171637	-0.0427509	-0.0740222	-0.0464671	-0.0742039	-0.109421	-0.113528	-0.0964009	-0.109594	-0.0428149	-0.0179401	-0.0343406	-0.0242492	0.00827738	-7.36483e-05	-0.000195786	-0.0203444	-0.0373807	-0.0164095	-0.00464722	0.00801907	-0.00783427	0.013994	0.0235215	0.0136738	-0.00550291
0	0	0	0	0	0	0	0	0	0	0	0	0	0	0	0	0	0	0	0	0	0	0	0.00999066	-0.0281093	-0.0339657	-0.0610378	-0.0566452	-0.0749273	-0.0889415	-0.102594	-0.0925592	-0.119317	-0.0695754	-0.0363208	-0.00753817	0.0124494	-0.00867633	-0.0194269	-0.0171554	-0.0198032	-0.0313201	-0.0224317	-0.0269236	-0.0179951	-0.0290938	-0.0165877	-0.00156319	-0.00327974	-0.00777862
0	0	0	0	0	0	0	0	0	0	0	0	0	0	0	0	0	0	0	0	0	0	0	0.0249473	0.00317786	-0.0800475	-0.0913336	-0.0553151	-0.041297	-0.0590974	-0.0718123	-0.0811857	-0.113174	-0.0783486	-0.0420047	-0.0109486	0.0285875	0.0158777	-0.00495216	-0.0163387	-0.0337897	-0.0506401	-0.0462174	-0.0353928	-0.0373474	-0.0601683	-0.0284927	-0.00895923	-0.0122364	-0.0120235
0	0	0	0	0	0	0	0	0	0	0	0	0	0	0	0	0	0	0	0	0	0	0	0.0258048	0.00169542	-0.0929491	-0.0714252	-0.020106	-0.0203978	-0.0669648	-0.0175293	-0.00931385	-0.0198186	-0.0187172	-0.0125132	0.0186325	0.0256499	0.0138047	-0.0100042	-0.0189295	-0.0502837	-0.0685273	-0.0578478	-0.04496	-0.0537293	-0.0472024	-0.0332633	-0.0208072	-0.0197584	0
0	0	0	0	0	0	0	0	0	0	0	0	0	0	0	0	0	0	0	0	0	0	0	0.0681236	0.0149423	-0.0703756	-0.0580057	-0.0127922	-0.0119943	-0.0247358	-0.0125522	-0.022591	-0.00823927	-0.00804076	-0.0350808	-0.0189697	0.0230241	0.00633313	-0.00974214	-0.0318416	-0.0600145	-0.0721316	-0.0586602	-0.0520077	-0.0474951	-0.0384706	-0.0319388	-0.0130816	-0.00938389	0
0	0	0	0	0	0	0	0	0	0	0	0	0	0	0	0	0	0	0	0	0	0	0	0.0551696	0.00658083	-0.0680306	-0.0723379	-0.0249357	-0.00256183	-0.00556611	-0.00684685	-0.0132366	0.0161492	-0.00969277	-0.0499489	-0.0459163	0.0123831	-0.00413534	-0.0388964	-0.073247	-0.0936192	-0.0740294	-0.0481962	-0.070478	-0.0650689	-0.0489883	-0.0328831	-0.015528	0	0
0	0	0	0	0	0	0	0	0	0	0	0	0	0	0	0	0	0	0	0	0	0	0	0	0.0588922	-0.0518134	-0.057156	0.00343	0.00774114	-0.0245428	-0.0205073	-0.0201083	-0.0165317	0.0179012	0.0217889	0.0164807	0.00998437	-0.00384052	-0.0242158	-0.0443787	-0.0643331	-0.0575217	-0.0668705	-0.0674248	-0.0553891	-0.0299354	-0.0161107	0.000433892	0	0
0	0	0	0	0	0	0	0	0	0	0	0	0	0	0	0	0	0	0	0	0	0	0	0	0	0.0671625	-0.014367	-0.0284843	0.0087254	0.0379274	0.0253979	-0.00797755	-0.0294136	0.0168508	-0.00103361	0.00499039	0.0140991	0.00303479	-0.030671	-0.0506726	-0.0637877	-0.0590628	-0.054554	-0.0550016	-0.0355905	-0.0174035	-0.00616525	0	0	0
0	0	0	0	0	0	0	0	0	0	0	0	0	0	0	0	0	0	0	0	0	0	0	0	0	0	0	0.0477803	0.0244633	0.0328963	0.116849	0.0681555	-0.0215279	-0.0619667	-0.024754	0.00661743	0.00502175	-0.00472596	-0.0249386	-0.0460112	-0.0585486	-0.0717879	-0.0852759	-0.0612816	-0.0334409	0	0	0	0	0
0	0	0	0	0	0	0	0	0	0	0	0	0	0	0	0	0	0	0	0	0	0	0	0	0	0	0	0	0.109784	0.0971946	0.129521	0.164932	0.115944	0.0533209	-0.0249265	-0.0400165	-0.00295738	-0.0213388	-0.0468835	-0.0821717	-0.10453	-0.10432	-0.0742575	-0.0320885	0	0	0	0	0	0
0	0	0	0	0	0	0	0	0	0	0	0	0	0	0	0	0	0	0	0	0	0	0	0	0	0	0	0	0	0.0542147	0.0313552	0.0745096	0.124221	0.0954822	0.042626	-0.00958754	-0.0200055	-0.0377945	-0.0602287	-0.0899456	-0.106468	-0.0683014	-0.01909	0	0	0	0	0	0	0
0	0	0	0	0	0	0	0	0	0	0	0	0	0	0	0	0	0	0	0	0	0	0	0	0	0	0	0	0	0	0.121219	0.0133597	0.0667315	0.138769	0.105485	0.0574039	0.0188251	-0.0132806	-0.0293432	-0.0330419	-0.00872339	0.022961	0	0	0	0	0	0	0	0
0	0	0	0	0	0	0	0	0	0	0	0	0	0	0	0	0	0	0	0	0	0	0	0	0	0	0	0	0	0	0	0	0	0	0	0	0	0	0	0	0	0	0	0	0	0	0	0	0	0
0	0	0	0	0	0	0	0	0	0	0	0	0	0	0	0	0	0	0	0	0	0	0	0	0	0	0	0	0	0	0	0	0	0	0	0	0	0	0	0	0	0	0	0	0	0	0	0	0	0
0	0	0	0	0	0	0	0	0	0	0	0	0	0	0	0	0	0	0	0	0	0	0	0	0	0	0	0	0	0	0	0	0	0	0	0	0	0	0	0	0	0	0	0	0	0	0	0	0	0
0	0	0	0	0	0	0	0	0	0	0	0	0	0	0	0	0	0	0	0	0	0	0	0	0	0	0	0	0	0	0	0	0	0	0	0	0	0	0	0	0	0	0	0	0	0	0	0	0	0
0	0	0	0	0	0	0	0	0	0	0	0	0	0	0	0	0	0	0	0	0	0	0	0	0	0	0	0	0	0	0	0	0	0	0	0	0	0	0	0	0	0	0	0	0	0	0	0	0	0
0	0	0	0	0	0	0	0	0	0	0	0	0	0	0	0	0	0	0	0	0	0	0	0	0	0	0	0	0	0	0	0	0	0	0	0	0	0	0	0	0	0	0	0	0	0	0	0	0	0
0	0	0	0	0	0	0	0	0	0	0	0	0	0	0	0	0	0	0	0	0	0	0	0	0	0	0	0	0	0	0	0	0	0	0	0	0	0	0	0	0	0	0	0	0	0	0	0	0	0
0	0	0	0	0	0	0	0	0	0	0	0	0	0	0	0	0	0	0	0	0	0	0	0	0	0	0	0	0	0	0	0	0	0	0	0	0	0	0	0	0	0	0	0	0	0	0	0	0	0
0	0	0	0	0	0	0	0	0	0	0	0	0	0	0	0	0	0	0	0	0	0	0	0	0	0	0	0	0	0	0	0	0	0	0	0	0	0	0	0	0	0	0	0	0	0	0	0	0	0
0	0	0	0	0	0	0	0	0	0	0	0	0	0	0	0	0	0	0	0	0	0	0	0	0	0	0	0	0	0	0	0	0	0	0	0	0	0	0	0	0	0	0	0	0	0	0	0	0	0
0	0	0	0	0	0	0	0	0	0	0	0	0	0	0	0	0	0	0	0	0	0	0	0	0	0	0	0	0	0	0	0	0	0	0	0	0	0	0	0	0	0	0	0	0	0	0	0	0	0
0	0	0	0	0	0	0	0	0	0	0	0	0	0	0	0	0	0	0	0	0	0	0	0	0	0	0	0	0	0	0	0	0	0	0	0	0	0	0	0	0	0	0	0	0	0	0	0	0	0
0	0	0	0	0	0	0	0	0	0	0	0	0	0	0	0	0	0	0	0	0	0	0	0	0	0	0	0	0	0	0	0	0	0	0	0	0	0	0	0	0	0	0	0	0	0	0	0	0	0
0	0	0	0	0	0	0	0	0	0	0	0	0	0	0	0	0	0	0	0	0	0	0	0	0	0	0	0	0	0	0	0	0	0	0	0	0	0	0	0	0	0	0	0	0	0	0	0	0	0
0	0	0	0	0	0	0	0	0	0	0	0	0	0	0	0	0	0	0	0	0	0	0	0	0	0	0	0	0	0	0	0	0	0	0	0	0	0	0	0	0	0	0	0	0	0	0	0	0	0
0	0	0	0	0	0	0	0	0	0	0	0	0	0	0	0	0	0	0	0	0	0	0	0	0	0	0	0	0	0	0	0	0	0	0	0	0	0	0	0	0	0	0	0	0	0	0	0	0	0
0	0	0	0	0	0	0	0	0	0	0	0	0	0	0	0	0	0	0	0	0	0	0	0	0	0	0	0	0	0	0	0	0	0	0	0	0	0	0	0	0	0	0	0	0	0	0	0	0	0
0	0	0	0	0	0	0	0	0	0	0	0	0	0	0	0	0	0	0	0	0	0	0	0	0	0	0	0	0	0	0	0	0	0	0	0	0	0	0	0	0	0	0	0	0	0	0	0	0	0
0	0	0	0	0	0	0	0	0	0	0	0	0	0	0	0	0	0	0	0	0	0	0	0	0	0	0	0	0	0	0	0	0	0	0	0	0	0	0	0	0	0	0	0	0	0	0	0	0	0
0	0	0	0	0	0	0	0	0	0	0	0	0	0	0	0	0	0	0	0	0	0	0	0	0	0	0	0	0	0	0	0	0	0	0	0	0	0	0	0	0	0	0	0	0	0	0	0	0	0
0	0	0	0	0	0	0	0	0	0	0	0	0	0	0	0	0	0	0	0	0	0	0	0	0	0	0	0	0	0	0	0	0	0	0	0	0	0	0	0	0	0	0	0	0	0	0	0	0	0
0	0	0	0	0	0	0	0	0	0	0	0	0	0	0	0	0	0	0	0	0	0	0	0	0	0	0	0	0	0	0	0	0	0	0	0	0	0	0	0	0	0	0	0	0	0	0	0	0	0
0	0	0	0	0	0	0	0	0	0	0	0	0	0	0	0	0	0	0	0	0	0	0	0	0	0	0	0	0	0	0	0	0	0	0	0	0	0	0	0	0	0	0	0	0	0	0	0	0	0
0	0	0	0	0	0	0	0	0	0	0	0	0	0	0	0	0	0	0	0	0	0	0	0	0	0	0	0	0	0	0	0	0	0	0	0	0	0	0	0	0	0	0	0	0	0	0	0	0	0
0	0	0	0	0	0	0	0	0	0	0	0	0	0	0	0	0	0	0	0	0	0	0	0	0	0	0	0	0	0	0	0	0	0	0	0	0	0	0	0	0	0	0	0	0	0	0	0	0	0
0	0	0	0	0	0	0	0	0	0	0	0	0	0	0	0	0	0	0	0	0	0	0	0	0	0	0	0	0	0	0	0	0	0	0	0	0	0	0	0	0	0	0	0	0	0	0	0	0	0
0	0	0	0	0	0	0	0	0	0	0	0	0	0	0	0	0	0	0	0	0	0	0	0	0	0	0	0	0	0	0	0	0	0	0	0	0	0	0	0	0	0	0	0	0	0	0	0	0	0
0	0	0	0	0	0	0	0	0	0	0	0	0	0	0	0	0	0	0	0	0	0	0	0	0	0	0	0	0	0	0	0	0	0	0	0	0	0	0	0	0	0	0	0	0	0	0	0	0	0
0	0	0	0	0	0	0	0	0	0	0	0	0	0	0	0	0	0	0	0	0	0	0	0	0	0	0	0	0	0	0	0	0	0	0	0	0	0	0	0	0	0	0	0	0	0	0	0	0	0
0	0	0	0	0	0	0	0	0	0	0	0	0	0	0	0	0	0	0	0	0	0	0	0	0	0	0	0	0	0	0	0	0	0	0	0	0	0	0	0	0	0	0	0	0	0	0	0	0	0
0	0	0	0	0	0	0	0	0	0	0	0	0	0	0	0	0	0	0	0	0	0	0	0	0	0	0	0	-0.0274797	-0.0615811	-0.0820426	0	0	0	0	0	0	0	0	0	0	0	0	0	0	0	0	0	0	0
0	0	0	0	0	0	0	0	0	0	0	0	0	0	0	0	0	0	0	0	0	0	0	0	-0.0328974	-0.026217	-0.0064899	0.051283	0.103677	0.100009	0.103159	0.0571482	0.0351684	0	0	0.0303801	-0.0111006	-0.0666428	0	0	0	0	0	0	0	0	0	0	0	0
0	0	0	0	0	0	0	0	0	0	0	0	0	0	0	0	0	0	0	0	-0.0166	-0.030018	-0.0260526	-0.0436431	-0.0517603	-0.0405847	-0.0121587	0.0755285	0.139749	0.137017	0.145129	0.101647	0.0149953	0.0432008	0.0349386	0.034935	0.0514721	-0.00178224	-0.104082	0	0	0	0	0	0	0	0	0	0	0
0	0	0	0	0	0	0	0	0	0	0	0	0	0	0	0	0	0	-0.00969532	-0.0399159	-0.0538936	-0.0640613	-0.0649946	-0.0561804	-0.0584562	-0.0492055	-0.00515101	0.083086	0.106442	0.0806179	0.0909496	0.0864086	0.0277803	0.0281549	0.0399869	-0.0258538	0.0520105	0.038526	-0.0457332	0	0	0	0	0	0	0	0	0	0	0
0	0	0	0	0	0	0	0	0	0	0	0	0	0	0	0	0.0776067	0.0165685	-0.0215985	-0.0677735	-0.0662908	-0.0321403	-0.0151429	0.0198843	0.0408425	0.0438282	0.0598982	0.0506522	0.000230186	-0.0166168	0.00149371	-0.140295	-0.242151	0.0687877	0.0898209	-0.0882516	0.0645941	-0.0449468	-0.182524	0	0	0	0	0	0	0	0	0	0	0
0	0	0	0	0	0	0	0	0	0	0	0	0	0	0	-0.0143318	-0.0252532	-0.0598948	-0.0797337	-0.0921767	-0.0796755	-0.0608284	-0.0370943	-0.0317433	-0.0365419	-0.0208161	-0.0222529	-0.0125552	-0.0468365	-0.0841029	-0.0610136	-0.0309839	0.0514695	0.0790407	-0.0386772	-0.0598688	-0.045426	-0.150041	0	0	0	0	0	0	0	0	0	0	0	0
0	0	0	0	0	0	0	0	0	0	0	0	0	0	-0.0251008	-0.0327089	-0.0300017	-0.0634512	-0.108921	-0.157795	-0.207845	-0.225244	-0.22028	-0.157838	-0.0456259	-0.0138764	-0.0423096	6.5464e-05	-0.0241645	0.0488843	0.0570981	0.0648856	0.0678236	-0.0662676	-0.107769	-0.0820573	-0.0504314	-0.0917023	-0.120533	0	0	0	0	0	0	0	0	0	0	0
0	0	0	0	0	0	0	0	0	0	0	0	0	0.0203999	-0.0274051	-0.0279607	-0.0228341	-0.0408096	-0.0776419	-0.144005	-0.218161	-0.313381	-0.25797	-0.0882828	-0.00305428	0.0356146	0.0413643	0.0733456	0.0387682	0.0697898	0.0873626	0.0898587	0.0103623	-0.102878	-0.0528745	-0.140924	-0.0956164	-0.0626084	-0.0999012	0	0	0	0	0	0	0	0	0	0	0
0	0	0	0	0	0	0	0	0	0	0	0	0	0.0245687	-0.0172073	-0.018452	-0.0216346	-0.0436757	-0.0739821	-0.107876	-0.146661	-0.151584	-0.0633891	0.025006	0.0454763	0.0626195	0.0612285	0.0949558	0.0421351	0.0362021	0.0271891	0.0435325	-0.0311171	-0.0108833	-0.108471	-0.168275	-0.0893948	-0.0442715	-0.0771633	0	0	0	0	0	0	0	0	0	0	0
0	0	0	0	0	0	0	0	0	0	0	0	0	0.0314901	-0.0097474	-0.0161125	-0.0105997	-0.0329276	-0.0573684	-0.0676817	-0.0835633	-0.0599189	0.017784	0.0567132	0.0575969	0.0720583	0.0691579	0.070342	0.0530179	-0.0074818	-0.048272	0.0168139	0.0487619	-0.0295272	-0.151797	-0.107562	-0.0432813	-0.0484217	0	0	0	0	0	0	0	0	0	0	0	0
0	0	0	0	0	0	0	0	0	0	0	0	0	0.0541397	0.00349665	-0.00149637	-0.00827732	-0.0289773	-0.0483617	-0.0567197	-0.0517847	-0.00657414	0.0457906	0.0643254	0.0659954	0.0656059	0.0773951	0.0726583	0.010477	-0.0857424	-0.125638	0.0529914	0.0402146	-0.0394335	-0.081346	-0.0240179	-0.0247759	-0.0427534	0	0	0	0	0	0	0	0	0	0	0	0
0	0	0	0	0	0	0	0	0	0	0	0	0	0.0890908	0.034291	0.00851319	0.00912357	-0.0226563	-0.0371655	-0.0482746	-0.0315058	0.0194087	0.0555452	0.0572237	0.0185957	0.00242674	-0.0395104	-0.0691033	-0.0486055	-0.038547	0.0535433	0.109559	0.0232746	-0.00279407	-0.0303213	-0.00060451	-0.00556109	-0.0484367	0	0	0	0	0	0	0	0	0	0	0	0
0	0	0	0	0	0	0	0	0	0	0	0	0	0.134626	0.127584	0.111571	0.0871619	0.0497146	0.0135935	-0.00307968	-0.0106385	-0.0233852	-0.0958703	-0.243827	-0.331638	-0.308269	-0.203906	-0.0683172	0.0208909	0.0490463	0.0401211	-0.116654	-0.22265	-0.142268	-0.183907	-0.229509	0	0	0	0	0	0	0	0	0	0	0	0	0	0
0	0	0	0	0	0	0	0	0	0	0	0	0	0	0.139304	0.132368	0.117521	0.0753058	0.0256534	-0.0606355	-0.0125091	0.0352871	0.0704221	0.0839422	0.0745845	0.0581608	0.0460341	0.0452157	0.0312277	0.00690411	0.0232317	0.0316904	0.00542482	0.00125592	-0.0323968	0	0	0	0	0	0	0	0	0	0	0	0	0	0	0
0	0	0	0	0	0	0	0	0	0	0	0	0	0	0.191604	0.15742	0.149922	0.107054	0.0618837	0.031229	0.0482867	0.0598225	0.0683679	0.0761659	0.0517583	0.0352939	0.00838649	0.0171302	0.00539859	-0.0081389	0.0167875	0.028283	0.00643501	0	0	0	0	0	0	0	0	0	0	0	0	0	0	0	0	0
0	0	0	0	0	0	0	0	0	0	0	0	0	0	0	0.213375	0.202161	0.159465	0.117855	0.0844402	0.0732201	0.0714357	0.0667338	0.0569698	0.0364566	0.00350104	-0.0127384	0.00204108	-0.000853224	0.000941542	0	0	0	0	0	0	0	0	0	0	0	0	0	0	0	0	0	0	0	0
0	0	0	0	0	0	0	0	0	0	0	0	0	0	0	0	0.225419	0.200146	0.178741	0.16344	0.135281	0.106482	0.0930649	0.0729361	0.0399487	0.014714	0.007639	0.0316722	0	0	0	0	0	0	0	0	0	0	0	0	0	0	0	0	0	0	0	0	0	0
0	0	0	0	0	0	0	0	0	0	0	0	0	0	0	0	0	0.193945	0.171963	0.163952	0.133599	0.119293	0.109685	0.101406	0.0528834	0.0462382	0.0380777	0	0	0	0	0	0	0	0	0	0	0	0	0	0	0	0	0	0	0	0	0	0	0
0	0	0	0	0	0	0	0	0	0	0	0	0	0	0	0	0	0	0.157597	0.147349	0.144254	0.135537	0.125569	0.10353	0.0620819	0	0	0	0	0	0	0	0	0	0	0	0	0	0	0	0	0	0	0	0	0	0	0	0	0
0	0	0	0	0	0	0	0	0	0	0	0	0	0	0	0	0	0	0	0	0	0	0	0	0	0	0	0	0	0	0	0	0	0	0	0	0	0	0	0	0	0	0	0	0	0	0	0	0	0
0	0	0	0	0	0	0	0	0	0	0	0	0	0	0	0	0	0	0	0	0	0	0	0	0	0	0	0	0	0	0	0	0	0	0	0	0	0	0	0	0	0	0	0	0	0	0	0	0	0
0	0	0	0	0	0	0	0	0	0	0	0	0	0	0	0	0	0	0	0	0	0	0	0	0	0	0	0	0	0	0	0	0	0	0	0	0	0	0	0	0	0	0	0	0	0	0	0	0	0
0	0	0	0	0	0	0	0	0	0	0	0	0	0	0	0	0	0	0	0	0	0	0	0	0	0	0	0	0	0	0	0	0	0	0	0	0	0	0	0	0	0	0	0	0	0	0	0	0	0
0	0	0	0	0	0	0	0	0	0	0	0	0	0	0	0	0	0	0	0	0	0	0	0	0	0	0	0	0	0	0	0	0	0	0	0	0	0	0	0	0	0	0	0	0	0	0	0	0	0
0	0	0	0	0	0	0	0	0	0	0	0	0	0	0	0	0	0	0	0	0	0	0	0	0	0	0	0	0	0	0	0	0	0	0	0	0	0	0	0	0	0	0	0	0	0	0	0	0	0
0	0	0	0	0	0	0	0	0	0	0	0	0	0	0	0	0	0	0	0	0	0	0	0	0	0	0	0	0	0	0	0	0	0	0	0	0	0	0	0	0	0	0	0	0	0	0	0	0	0
0	0	0	0	0	0	0	0	0	0	0	0	0	0	0	0	0	0	0	0	0	0	0	0	0	0	0	0	0	0	0	0	0	0	0	0	0	0	0	0	0	0	0	0	0	0	0	0	0	0
0	0	0	0	0	0	0	0	0	0	0	0	0	0	0	0	0	0	0	0	0	0	0	0	0	0	0	0	0	0	0	0	0	0	0	0	0	0	0	0	0	0	0	0	0	0	0	0	0	0
0	0	0	0	0	0	0	0	0	0	0	0	0	0	0	0	0	0	0	0	0	0	0	0	0	0	0	0	0	0	0	0	0	0	0	0	0	0	0	0	0	0	0	0	0	0	0	0	0	0
0	0	0	0	0	0	0	0	0	0	0	0	0	0	0	0	0	0	0	0	0	0	0	0	0	0	0	0	0	0	0	0	0	0	0	0	0	0	0	0	0	0	0	0	0	0	0	0	0	0
0	0	0	0	0	0	0	0	0	0	0	0	0	0	0	0	0	0	0	0	0	0	0	0	0	0	0	0	0	0	0	0	0	0	0	0	0	0	0	0	0	0	0	0	0	0	0	0	0	0
0	0	0	0	0	0	0	0	0	0	0	0	0	0	0	0	0	0	0	0	0	0	0	0	0	0	0	0	0	0	0	0	0	0	0	0	0	0	0	0	0	0	0	0	0	0	0	0	0	0
0	0	0	0	0	0	0	0	0	0	0	0	0	0	0	0	0	0	0	0	0	0	0	0	0	0	0	0	0	0	0	0	0	0	0	0	0	0	0	0	0	0	0	0	0	0	0	0	0	0
0	0	0	0	0	0	0	0	0	0	0	0	0	0	0	0	0	0	0	0	0	0	0	0	0	0	0	0	0	0	0	0	0	0	0	0	0	0	0	0	0	0	0	0	0	0	0	0	0	0
0	0	0	0	0	0	0	0	0	0	0	0	0	0	0	0	0	0	0	0	0	0	0	0	0	0	0	0	0	0	0	0	0	0	0	0	0	0	0	0	0	0	0	0	0	0	0	0	0	0
0	0	0	0	0	0	0	0	0	0	0	0	0	0	0	0	0	0	0	0	0	0	0	0	0	0	0	0	0	0	0	0	0	0	0	0	0	0	0	0	0	0	0	0	0	0	0	0	0	0
0	0	0	0	0	0	0	0	0	0	0	0	0	0	0	0	0	0	0	0	0	0	0	0	0	0	0	0	0	0	0	0	0	0	0	0	0	0	0	0	0	0	0	0	0	0	0	0	0	0
0	0	0	0	0	0	0	0	0	0	0	0	0	0	0	0	0	0	0	0	0	0	0	0	0	0	0	0	0	0	0	0	0	0	0	0	0	0	0	0	0	0	0	0	0	0	0	0	0	0
0	0	0	0	0	0	0	0	0	0	0	0	0	0	0	0	0	0	0	0	0	0	0	0	0	0	0	0	0	0	0	0	0	0	0	0	0	0	0	0	0	0	0	0	0	0	0	0	0	0
0	0	0	0	0	0	0	0	0	0	0	0	0	0	0	0	0	0	0	0	0	0	0	0	0	0	0	0	0	0	0	0	0	0	0	0	0	0	0	0	0	0	0	0	0	0	0	0	0	0
0	0	0	0	0	0	0	0	0	0	0	0	0	0	0	0	0	0	0	0	0	0	0	0	0	0	0	0	0	0	0	0	0	0	0	0	0	0	0	0	0	0	0	0	0	0	0	0	0	0
0	0	0	0	0	0	0	0	0	0	0	0	0	0	0	0	0	0	0	0	0	0	0	0	0	0	0	0	0	0	0	0	0	0	0	0	0	0	0	0	0	0	0	0	0	0	0	0	0	0
0	0	0	0	0	0	0	0	0	0	0	0	0	0	0	0	0	0	0	0	0	0	0	0	0	0	0	0	0	0	0	0	0	0	0	0	0	0	0	0	0	0	0	0	0	0	0	0	0	0
0	0	0	0	0	0	0	0	0	0	0	0	0	0	0	0	0	0	0	0	0	0	0	0	0	0	0	0	0	0	0	0	0	0	0	0	0	0	0	0	0	0	0	0	0	0	0	0	0	0
0	0	0	0	0	0	0	0	0	0	0	0	0	0	0	0	0	0	0	0	0	0	0	0	0	0	0	0	0	0	0	0	0	0	0	0	0	0	0	0	0	0	0	0	0	0	0	0	0	0
0	0	0	0	0	0	0	0	0	0	0	0	0	0	0	0	0	0	0	0	0	0	0	0	0	0	0	0	0	0	0	0	0	0	0	0	0	0	0	0	0	0	0	0	0	0	0	0	0	0
0	0	0	0	0	0	0	0	0	0	0	0	0	0	0	0	0	0	0	0	0	0	0	0	0	0	0	0	0	0	0	0	0	0	0	0	0	0	0	0	0	0	0	0	0	0	0	0	0	0
0	0	0	0	0	0	0	0	0	0	0	0	0	0	0	0	0	0	0	0	0	0	0	0	0	0	0	0	0	0	0	0	0.0380849	0.0326298	0.0143605	0.0186318	0.0290579	0.0332245	0.012724	0.00129797	0	0	0	0	0	0	0	0	0	0
0	0	0	0	0	0	0	0	0	0	0	0	0	0	0	0	0	0	0	0	0	0	0	0	0	0	0	0	0	0	0.0930648	0.0574929	0.0253454	0.021951	0.00193355	0.00950111	0.0268631	0.0366024	0.0406469	0.021987	0.0159809	0	0	0	0	0	0	0	0	0
0	0	0	0	0	0	0	0	0	0	0	0	0	0	0	0	0	0	0	0	0	0	0	0	0	0	0	0	0	0.082811	0.0556581	0.0383163	0.00968658	0.0110356	-0.011589	-0.00612901	0.0188289	0.0380551	0.0532544	0.0641149	0.0292398	0.0267887	0.0196921	0	0	0	0	0	0	0
0	0	0	0	0	0	0	0	0	0	0	0	0	0	0	0	0	0	0	0	0	0	0	0	0	0	0	0	0.0896115	0.0428517	0.0364169	0.0241521	-0.0113572	-0.0224142	-0.0460604	-0.0912454	-0.0906712	-0.000917018	0.0660134	0.114886	0.151041	0.138635	0.0936692	0.0560101	0	0	0	0	0	0
0	0	0	0	0	0	0	0	0	0	0	0	0	0	0	0	0	0	0	0	0	0	0	0	0	0	0	0	0.0708527	0.041401	0.0294336	0.00854045	-0.0247728	-0.0197828	-0.0409144	-0.101482	-0.114031	-0.0369454	0.0522583	0.114	0.157183	0.187735	0.164348	0.107033	0.0681161	0	0	0	0	0
0	0	0	0	0	0	0	0	0	0	0	0	0	0	0	0	0	0	0	0	0	0	0	0	0	0	0	0	0.0938017	0.0587434	0.050464	0.0236261	-0.0131698	-0.0147475	-0.0427732	-0.0593181	-0.0361946	0.00514823	0.0416837	0.0789106	0.11899	0.158678	0.193349	0.207664	0.247196	0.3338	0	0	0	0
0	0	0	0	0	0	0	0	0	0	0	0	0	0	0	0	0	0	0	0	0	0	0	0	0	0	0	0.105901	0.0730574	0.0222353	0.0190948	-0.012457	-0.0441725	-0.0356943	-0.0483699	-0.0379276	-0.0144443	-0.00215602	0.0215632	0.0556332	0.0779071	0.113915	0.150467	0.165647	0.169266	0.146455	0.0858099	0	0	0
0	0	0	0	0	0	0	0	0	0	0	0	0	0	0	0	0	0	0	0	0	0	0	0	0	0	0	0.12471	0.0750669	0.0236992	0.00404936	-0.0246507	-0.0858444	-0.123821	-0.163447	-0.168171	-0.157598	-0.126666	-0.116199	-0.0906948	-0.0601367	-0.027542	0.0219089	0.0634731	0.0812036	0.0795941	0.0516643	0.0132153	0	0
0	0	0	0	0	0	0	0	0	0	0	0	0	0	0	0	0	0	0	0	0	0	0	0	0	0	0	0	0.0791985	0.0110422	-0.00692831	-0.0325604	-0.141822	-0.171736	-0.19955	-0.192941	-0.174556	-0.149181	-0.14337	-0.12437	-0.100827	-0.0673046	-0.0201732	0.0260499	0.0410297	0.0443594	0.0268427	0.00189351	0	0
0	0	0	0	0	0	0	0	0	0	0	0	0	0	0	0	0	0	0	0	0	0	0	0	0	0	0	0	0.0755993	-0.0017288	-0.0173193	-0.0688603	-0.127661	-0.195851	-0.238056	-0.187759	-0.172561	-0.18087	-0.17862	-0.145881	-0.128876	-0.100887	-0.05342	-0.0130073	0.0133859	0.0269369	0.0255267	0.0127222	0	0
0	0	0	0	0	0	0	0	0	0	0	0	0	0	0	0	0	0	0	0	0	0	0	0	0	0	0	0	0.0705079	-0.0072479	-0.0299626	-0.0841035	-0.162075	-0.177235	-0.192077	-0.181393	-0.150902	-0.148348	-0.171497	-0.181693	-0.171319	-0.141259	-0.0931157	-0.0332841	0.00240332	0.0181475	0.0114905	0.013144	0	0
0	0	0	0	0	0	0	0	0	0	0	0	0	0	0	0	0	0	0	0	0	0	0	0	0	0	0	0	0.0571409	-0.0162126	-0.046796	-0.0864563	-0.167842	-0.165042	-0.182177	-0.187436	-0.178591	-0.176588	-0.196067	-0.190344	-0.157023	-0.1279	-0.101241	-0.0585836	-0.0150886	0.0111743	0.00144459	0	0	0
0	0	0	0	0	0	0	0	0	0	0	0	0	0	0	0	0	0	0	0	0	0	0	0	0	0	0	0	0.0447065	-0.0232977	-0.0245008	-0.0637908	-0.0985979	-0.12155	-0.151348	-0.152643	-0.13979	-0.169888	-0.168052	-0.145689	-0.125535	-0.102842	-0.0674263	-0.0419229	-0.00728539	0.0244266	0.0262161	0	0	0
0	0	0	0	0	0	0	0	0	0	0	0	0	0	0	0	0	0	0	0	0	0	0	0	0	0	0	0.0896951	0.0322942	-0.0250505	-0.0202704	-0.0425601	-0.0920215	-0.111315	-0.128265	-0.149608	-0.139717	-0.133456	-0.131295	-0.109891	-0.0874839	-0.0546403	-0.02048	-0.00178213	0.0129918	0	0	0	0	0
0	0	0	0	0	0	0	0	0	0	0	0	0	0	0	0	0	0	0	0	0	0	0	0	0	0	0	0.00792173	-0.0297244	-0.0663476	-0.0869929	-0.124366	-0.141246	-0.166454	-0.197578	-0.184041	-0.234491	-0.290582	-0.285887	-0.268325	-0.248464	-0.25947	0	0	0	0	0	0	0	0
0	0	0	0	0	0	0	0	0	0	0	0	0	0	0	0	0	0	0	0	0	0	0	0	0	0	0	0	0	0.014307	-0.00575716	-0.0152661	-0.0467679	0	-0.082089	-0.0331316	0	0	0	0	0	0	0	0	0	0	0	0	0	0
0	0	0	0	0	0	0	0	0	0	0	0	0	0	0	0	0	0	0	0	0	0	0	0	0	0	0	0	0	0	0	0	0	0	0	0	0	0	0	0	0	0	0	0	0	0	0	0	0	0
0	0	0	0	0	0	0	0	0	0	0	0	0	0	0	0	0	0	0	0	0	0	0	0	0	0	0	0	0	0	0	0	0	0	0	0	0	0	0	0	0	0	0	0	0	0	0	0	0	0
0	0	0	0	0	0	0	0	0	0	0	0	0	0	0	0	0	0	0	0	0	0	0	0	0	0	0	0	0	0	0	0	0	0	0	0	0	0	0	0	0	0	0	0	0	0	0	0	0	0
0	0	0	0	0	0	0	0	0	0	0	0	0	0	0	0	0	0	0	0	0	0	0	0	0	0	0	0	0	0	0	0	0	0	0	0	0	0	0	0	0	0	0	0	0	0	0	0	0	0
0	0	0	0	0	0	0	0	0	0	0	0	0	0	0	0	0	0	0	0	0	0	0	0	0	0	0	0	0	0	0	0	0	0	0	0	0	0	0	0	0	0	0	0	0	0	0	0	0	0
0	0	0	0	0	0	0	0	0	0	0	0	0	0	0	0	0	0	0	0	0	0	0	0	0	0	0	0	0	0	0	0	0	0	0	0	0	0	0	0	0	0	0	0	0	0	0	0	0	0
0	0	0	0	0	0	0	0	0	0	0	0	0	0	0	0	0	0	0	0	0	0	0	0	0	0	0	0	0	0	0	0	0	0	0	0	0	0	0	0	0	0	0	0	0	0	0	0	0	0
0	0	0	0	0	0	0	0	0	0	0	0	0	0	0	0	0	0	0	0	0	0	0	0	0	0	0	0	0	0	0	0	0	0	0	0	0	0	0	0	0	0	0	0	0	0	0	0	0	0
0	0	0	0	0	0	0	0	0	0	0	0	0	0	0	0	0	0	0	0	0	0	0	0	0	0	0	0	0	0	0	0	0	0	0	0	0	0	0	0	0	0	0	0	0	0	0	0	0	0
0	0	0	0	0	0	0	0	0	0	0	0	0	0	0	0	0	0	0	0	0	0	0	0	0	0	0	0	0	0	0	0	0	0	0	0	0	0	0	0	0	0	0	0	0	0	0	0	0	0
0	0	0	0	0	0	0	0	0	0	0	0	0	0	0	0	0	0	0	0	0	0	0	0	0	0	0	0	0	0	0	0	0	0	0	0	0	0	0	0	0	0	0	0	0	0	0	0	0	0
0	0	0	0	0	0	0	0	0	0	0	0	0	0	0	0	0	0	0	0	0	0	0	0	0	0	0	0	0	0	0	0	0	0	0	0	0	0	0	0	0	0	0	0	0	0	0	0	0	0
0	0	0	0	0	0	0	0	0	0	0	0	0	0	0	0	0	0	0	0	0	0	0	0	0	0	0	0	0	0	0	0	0	0	0	0	0	0	0	0	0	0	0	0	0	0	0	0	0	0
0	0	0	0	0	0	0	0	0	0	0	0	0	0	0	0	0	0	0	0	0	0	0	0	0	0	0	0	0	0	0	0	0	0	0	0	0	0	0	0	0	0	0	0	0	0	0	0	0	0
0	0	0	0	0	0	0	0	0	0	0	0	0	0	0	0	0	0	0	0	0	0	0	0	0	0	0	0	0	0	0	0	0	0	0	0	0	0	0	0	0	0	0	0	0	0	0	0	0	0
0	0	0	0	0	0	0	0	0	0	0	0	0	0	0	0	0	0	0	0	0	0	0	0	0	0	0	0	0	0	0	0	0	0	0	0	0	0	0	0	0	0	0	0	0	0	0	0	0	0
0	0	0	0	0	0	0	0	0	0	0	0	0	0	0	0	0	0	0	0	0	0	0	0	0	0	0	0	0	0	0	0	0	0	0	0	0	0	0	0	0	0	0	0	0	0	0	0	0	0
0	0	0	0	0	0	0	0	0	0	0	0	0	0	0	0	0	0	0	0	0	0	0	0	0	0	0	0	0	0	0	0	0	0	0	0	0	0	0	0	0	0	0	0	0	0	0	0	0	0
0	0	0	0	0	0	0	0	0	0	0	0	0	0	0	0	0	0	0	0	0	0	0	0	0	0	0	0	0	0	0	0	0	0	0	0	0	0	0	0	0	0	0	0	0	0	0	0	0	0
0	0	0	0	0	0	0	0	0	0	0	0	0	0	0	0	0	0	0	0	0	0	0	0	0	0	0	0	0	0	0	0	0	0	0	0	0	0	0	0	0	0	0	0	0	0	0	0	0	0
0	0	0	0	0	0	0	0	0	0	0	0	0	0	0	0	0	0	0	0	0	0	0	0	0	0	0	0	0	0	0	0	0	0	0	0	0	0	0	0	0	0	0	0	0	0	0	0	0	0
0	0	0	0	0	0	0	0	0	0	0	0	0	0	0	0	0	0	0	0	0	0	0	0	0	0	0	0	0	0	0	0	0	0	0	0	0	0	0	0	0	0	0	0	0	0	0	0	0	0
0	0	0	0	0	0	0	0	0	0	0	0	0	0	0	0	0	0	0	0	0	0	0	0	0	0	0	0	0	0	0	0	0	0	0	0	0	0	0	0	0	0	0	0	0	0	0	0	0	0
0	0	0	0	0	0	0	0	0	0	0	0	0	0	0	0	0	0	0	0	0	0	0	0	0	0	0	0	0	0	0	0	0	0	0	0	0	0	0	0	0	0	0	0	0	0	0	0	0	0
0	0	0	0	0	0	0	0	0	0	0	0	0	0	0	0	0	0	0	0	0	0	0	0	0	0	0	0	0	0	0	0	0	0	0	0	0	0	0	0	0	0	0	0	0	0	0	0	0	0
0	0	0	0	0	0	0	0	0	0	0	0	0	0	0	0	0	0	0	0	0	0	0	0	0	0	0	0	0	0	0	0	0	0	0	0	0	0	0	0	0	0	0	0	0	0	0	0	0	0
0	0	0	0	0	0	0	0	0	0	0	0	0	0	0	0	0	0	0	0	0	0	0	0	0	0	0	0	0	0	0	0	0	0	0	0	0	0	0	0	0	0	0	0	0	0	0	0	0	0
0	0	0	0	0	0	0	0	0	0	0	0	0	0	0	0	0	0	0	0	0	0	0	0	0	0	0	0	0	0	0	0	0	0	0	0	0	0	0	0	0	0	0	0	0	0	0	0	0	0
0	0	0	0	0	0	0	0	0	0	0	0	0	0	0	0	0	0	0	0	0	0	0	0	0	0	0	0	0	0	0	0	0	0	0	0	0	0	0	0	0	0	0	0	0	0	0	0	0	0
0	0	0	0	0	0	0	0	0	0	0	0	0	0	0	0	0	0	0	0	0	0	0	0	0	0	0	0	0	0.219041	0.241021	0.237397	0.203834	0.200603	0.181916	0.150294	0.122141	0	0	0	0	0	0	0	0	0	0	0	0	0
0	0	0	0	0	0	0	0	0	0	0	0	0	0	0	0	0	0	0	0	0	0	0	0	0	0.154808	0.160132	0.175224	0.194932	0.188186	0.19006	0.182656	0.14185	0.168554	0.195081	0.217197	0.223951	0.191642	0.156713	0.0910231	0	0	0	0	0	0	0	0	0	0
0	0	0	0	0	0	0	0	0	0	0	0	0	0	0	0	0	0	0	0	0	0	0	0	0.126395	0.141514	0.133288	0.138624	0.135138	0.0939939	0.0503882	0.0303692	0.00919025	0.0319851	0.0743505	0.103291	0.171317	0.240971	0.257942	0.227297	0.156444	0.0527853	0	0	0	0	0	0	0	0
0	0	0	0	0	0	0	0	0	0	0	0	0	0	0	0	0	0	0	0	0	0	0	0.155152	0.128662	0.126515	0.117829	0.108071	0.154418	0.117372	-0.0043789	0.00376166	0.0121666	-0.023629	-0.119149	-0.19698	-0.280745	-0.0902083	0.104669	0.0502303	-0.0475673	0.0403884	0.0308569	0.0268543	0	0	0	0	0	0
0	0	0	0	0	0	0	0	0	0	0	0	0	0	0	0	0	0	0	0	0	0	0.114042	0.0931591	0.0929978	0.101712	0.0820943	0.0462704	-0.0145665	-0.0280455	-0.0117392	0.0190343	0.0222499	0.0189744	-0.0357843	-0.0134542	0.0428077	0.0693736	0.0421853	0.0295472	0.0456011	0.0349389	0.0160798	0.00302439	0	0	0	0	0	0
0	0	0	0	0	0	0	0	0	0	0	0	0	0	0	0	0	0	0	0	0	0	0.0949988	0.0762592	0.0720063	0.0902622	0.0225265	-0.0178251	-0.0364952	-0.064757	-0.0149997	0.0386834	0.0399942	0.0447691	-0.0113301	-0.0213015	0.022527	0.000424827	0.0046888	-0.00124166	0.0174536	0.00502478	-0.00281206	-0.016009	0	0	0	0	0	0
0	0	0	0	0	0	0	0	0	0	0	0	0	0	0	0	0	0	0	0	0	0.0595199	0.0758217	0.0723568	0.0657562	0.0586086	-0.0498948	-0.0460471	-0.0599325	-0.02437	-0.0021472	0.0428314	0.0531258	0.0419744	-0.00469432	-0.0188917	0.0002898	-0.00864327	-0.0137497	-0.00572422	4.73962e-05	-0.00445491	-0.0153702	-0.0158607	0	0	0	0	0	0
0	0	0	0	0	0	0	0	0	0	0	0	0	0	0	0	0	0	0	0	0	0	0.00673026	0.0401119	0.056852	-0.0506481	-0.101726	-0.0936892	-0.0762725	-0.0280918	-0.019801	0.0430845	0.0557644	0.0430059	0.0288991	-0.0146858	-0.031153	-0.0346893	-0.0283931	-0.0223662	-0.024448	-0.0279748	-0.0276762	-0.0227173	-0.0436466	0	0	0	0	0
0	0	0	0	0	0	0	0	0	0	0	0	0	0	0	0	0	0	0	0	0	0	-0.00209304	-0.0166485	-0.0243095	-0.171421	-0.227518	-0.150542	-0.102836	-0.075773	-0.071302	0.0216129	0.0487588	0.0270346	-0.00412138	-0.044119	-0.0539963	-0.0473054	-0.0429642	-0.0458099	-0.0377293	-0.0369387	-0.0300638	-0.0218813	-0.0319287	0	0	0	0	0
0	0	0	0	0	0	0	0	0	0	0	0	0	0	0	0	0	0	0	0	0	0	0.0307983	-0.0112328	-0.087464	-0.177569	-0.173158	-0.139696	-0.0932042	-0.0725016	-0.0704072	0.0236667	0.0516119	0.0367053	0.00734926	-0.0266106	-0.0625072	-0.062489	-0.0501654	-0.0556685	-0.049523	-0.0438185	-0.0354657	-0.0274374	-0.0328215	0	0	0	0	0
0	0	0	0	0	0	0	0	0	0	0	0	0	0	0	0	0	0	0	0	0	0	0.0827482	0.00396645	-0.071116	-0.0962405	-0.0716015	-0.057293	-0.0654021	-0.100062	-0.0813077	0.0114194	0.0488205	0.04961	0.021383	-0.00111892	-0.0415294	-0.0575934	-0.0624409	-0.0594886	-0.0535242	-0.052052	-0.0364441	-0.0221921	-0.0209005	0	0	0	0	0
0	0	0	0	0	0	0	0	0	0	0	0	0	0	0	0	0	0	0	0	0	0	0	0.0365074	-0.0301319	-0.0446659	-0.0216273	0.0160281	-0.0198583	-0.12355	-0.0808335	0.0199641	0.0319206	0.0432308	0.0236968	0.0176286	0.0134268	-0.0031297	-0.0281794	-0.0511579	-0.060985	-0.0545686	-0.03593	-0.0288005	-0.075848	0	0	0	0	0
0	0	0	0	0	0	0	0	0	0	0	0	0	0	0	0	0	0	0	0	0	0	0	0.032333	-0.0135112	-0.0249687	-0.018939	-0.00932158	-0.0376002	-0.0449945	-0.022519	0.0315862	0.049822	0.0547212	0.0302894	0.0327294	0.00581505	-0.0253145	-0.0665601	-0.053534	-0.0495435	-0.0323754	-0.0186921	-0.010256	0	0	0	0	0	0
0	0	0	0	0	0	0	0	0	0	0	0	0	0	0	0	0	0	0	0	0	0	0	0.0520073	-0.00481404	-0.0125903	-0.0233841	-0.0216308	-0.0333244	-0.0321752	-0.0106808	0.0391702	0.0474591	0.0552766	0.0416873	0.0390156	0.0182762	-0.0124344	-0.0407505	-0.0469504	-0.0421398	-0.0293912	-0.0111273	-0.0106102	0	0	0	0	0	0
0	0	0	0	0	0	0	0	0	0	0	0	0	0	0	0	0	0	0	0	0	0	0	0.0710288	-0.000433171	-0.0258947	-0.0317744	-0.0187807	-0.0227295	-0.0152754	0.00540335	0.053209	0.0472122	0.0466097	0.0252985	0.0456546	0.0246781	-0.020326	-0.0254834	-0.0190838	-0.0211934	-0.0131076	-0.00637713	0	0	0	0	0	0	0
0	0	0	0	0	0	0	0	0	0	0	0	0	0	0	0	0	0	0	0	0	0	0	0.100958	0.0144733	-0.0150265	-0.0244577	-0.0129561	-0.027716	-0.0398685	0.0146179	0.0503295	0.0359104	0.0395833	0.0156663	0.0491586	0.0179478	-0.0175056	0.00287191	0.0152258	-0.0022051	-0.00231254	0.000413936	0	0	0	0	0	0	0
0	0	0	0	0	0	0	0	0	0	0	0	0	0	0	0	0	0	0	0	0	0	0	0.121307	0.0307325	-0.0310415	-0.0328642	-0.0192951	-0.0260798	-0.0323275	0.0119829	0.034336	0.0187038	0.0229286	0.00377529	0.0413639	-0.00359588	-0.025035	-0.00357449	0.0189927	-0.00165603	-0.00280778	0	0	0	0	0	0	0	0
0	0	0	0	0	0	0	0	0	0	0	0	0	0	0	0	0	0	0	0	0	0	0	0	0.0858766	-0.0351081	-0.0678277	-0.0382146	-0.0354851	-0.033439	-0.0528362	-0.0152769	-0.0348519	0.00728292	0.00546795	-0.00287484	-0.0460935	-0.0197844	-0.00585654	0.0127602	0.00574917	0	0	0	0	0	0	0	0	0
0	0	0	0	0	0	0	0	0	0	0	0	0	0	0	0	0	0	0	0	0	0	0	0	0	0.0600577	0.0190301	0.0381576	0.000324086	0.000915353	-0.0320716	-0.0124241	-0.0661841	-0.016335	0.00126919	-0.0239228	-0.0853915	-0.0261879	-0.000737248	0.0153217	0	0	0	0	0	0	0	0	0	0
0	0	0	0	0	0	0	0	0	0	0	0	0	0	0	0	0	0	0	0	0	0	0	0	0	0	0	0	0	0.0236918	0.0517991	0.106809	0.0117852	-0.0244205	-0.0553524	-0.133688	0	0	0	0	0	0	0	0	0	0	0	0	0	0
0	0	0	0	0	0	0	0	0	0	0	0	0	0	0	0	0	0	0	0	0	0	0	0	0	0	0	0	0	0	0	0	0	0	0	0	0	0	0	0	0	0	0	0	0	0	0	0	0	0
0	0	0	0	0	0	0	0	0	0	0	0	0	0	0	0	0	0	0	0	0	0	0	0	0	0	0	0	0	0	0	0	0	0	0	0	0	0	0	0	0	0	0	0	0	0	0	0	0	0
0	0	0	0	0	0	0	0	0	0	0	0	0	0	0	0	0	0	0	0	0	0	0	0	0	0	0	0	0	0	0	0	0	0	0	0	0	0	0	0	0	0	0	0	0	0	0	0	0	0
0	0	0	0	0	0	0	0	0	0	0	0	0	0	0	0	0	0	0	0	0	0	0	0	0	0	0	0	0	0	0	0	0	0	0	0	0	0	0	0	0	0	0	0	0	0	0	0	0	0
0	0	0	0	0	0	0	0	0	0	0	0	0	0	0	0	0	0	0	0	0	0	0	0	0	0	0	0	0	0	0	0	0	0	0	0	0	0	0	0	0	0	0	0	0	0	0	0	0	0
0	0	0	0	0	0	0	0	0	0	0	0	0	0	0	0	0	0	0	0	0	0	0	0	0	0	0	0	0	0	0	0	0	0	0	0	0	0	0	0	0	0	0	0	0	0	0	0	0	0
0	0	0	0	0	0	0	0	0	0	0	0	0	0	0	0	0	0	0	0	0	0	0	0	0	0	0	0	0	0	0	0	0	0	0	0	0	0	0	0	0	0	0	0	0	0	0	0	0	0
0	0	0	0	0	0	0	0	0	0	0	0	0	0	0	0	0	0	0	0	0	0	0	0	0	0	0	0	0	0	0	0	0	0	0	0	0	0	0	0	0	0	0	0	0	0	0	0	0	0
0	0	0	0	0	0	0	0	0	0	0	0	0	0	0	0	0	0	0	0	0	0	0	0	0	0	0	0	0	0	0	0	0	0	0	0	0	0	0	0	0	0	0	0	0	0	0	0	0	0
0	0	0	0	0	0	0	0	0	0	0	0	0	0	0	0	0	0	0	0	0	0	0	0	0	0	0	0	0	0	0	0	0	0	0	0	0	0	0	0	0	0	0	0	0	0	0	0	0	0
0	0	0	0	0	0	0	0	0	0	0	0	0	0	0	0	0	0	0	0	0	0	0	0	0	0	0	0	0	0	0	0	0	0	0	0	0	0	0	0	0	0	0	0	0	0	0	0	0	0
0	0	0	0	0	0	0	0	0	0	0	0	0	0	0	0	0	0	0	0	0	0	0	0	0	0	0	0	0	0	0	0	0	0	0	0	0	0	0	0	0	0	0	0	0	0	0	0	0	0
0	0	0	0	0	0	0	0	0	0	0	0	0	0	0	0	0	0	0	0	0	0	0	0	0	0	0	0	0	0	0	0	0	0	0	0	0	0	0	0	0	0	0	0	0	0	0	0	0	0
0	0	0	0	0	0	0	0	0	0	0	0	0	0	0	0	0	0	0	0	0	0	0	0	0	0	0	0	0	0	0	0	0	0	0	0	0	0	0	0	0	0	0	0	0	0	0	0	0	0
0	0	0	0	0	0	0	0	0	0	0	0	0	0	0	0	0	0	0	0	0	0	0	0	0	0	0	0	0	0	0	0	0	0	0	0	0	0	0	0	0	0	0	0	0	0	0	0	0	0
0	0	0	0	0	0	0	0	0	0	0	0	0	0	0	0	0	0	0	0	0	0	0	0	0	0	0	0	0	0	0	0	0	0	0	0	0	0	0	0	0	0	0	0	0	0	0	0	0	0
0	0	0	0	0	0	0	0	0	0	0	0	0	0	0	0	0	0	0	0	0	0	0	0	0	0	0	0	0	0	0	0	0	0	0	0	0	0	0	0	0	0	0	0	0	0	0	0	0	0
0	0	0	0	0	0	0	0	0	0	0	0	0	0	0	0	0	0	0	0	0	0	0	0	0	0	0	0	0	0	0	0	0	0	0	0	0	0	0	0	0	0	0	0	0	0	0	0	0	0
0	0	0	0	0	0	0	0	0	0	0	0	0	0	0	0	0	0	0	0	0	0	0	0	0	0	0	0	0	0	0	0	0	0	0	0	0	0	0	0	0	0	0	0	0	0	0	0	0	0
0	0	0	0	0	0	0	0	0	0	0	0	0	0	0	0	0	0	0	0	0	0	0	0	0	0	0	0	0	0	0	0	0	0	0	0	0	0	0	0	0	0	0	0	0	0	0	0	0	0
0	0	0	0	0	0	0	0	0	0	0	0	0	0	0	0	0	0	0	0	0	0	0	0	0	0	0	0	0	0	0	0	0	0	0	0	0	0	0	0	0	0	0	0	0	0	0	0	0	0
0	0	0	0	0	0	0	0	0	0	0	0	0	0	0	0	0	0	0	0	0	0	0	0	0	0	0	0	0	0	0	0	0	0	0	0	0	0	0	0	0	0	0	0	0	0	0	0	0	0
0	0	0	0	0	0	0	0	0	0	0	0	0	0	0	0	0	0	0	0	0	0	0	0	0	0	0	0	0	0	0	0	0	0	0	0	0	0	0	0	0	0	0	0	0	0	0	0	0	0
0	0	0	0	0	0	0	0	0	0	0	0	0	0	0	0	0	0	0	0	0	0	0	0	0	0	0	0	0	0	0	0	0	0	0	0	0	0	0	0	0	0	0	0	0	0	0	0	0	0
0	0	0	0	0	0	0	0	0	0	0	0	0	0	0	0	0	0	0	0	0	0	0	0	0	0	0	0	0	0	0	0	0	0	0	0	0	0	0	0	0	0	0	0	0	0	0	0	0	0
0	0	0	0	0	0	0	0	0	0	0	0	0	0	0	0	0	0	0	0	0	0	0	0	0	0	0	0	0	0	0	0	0	0	0	0	0	0	0	0	0	0	0	0	0	0	0	0	0	0
0	0	0	0	0	0	0	0	0	0	0	0	0	0	0	0	0	0	0	0	0	0	0	0	0	0	0	0	0	0	0	0	0	0	0	0	0	0	0	0	0	0	0	0	0	0	0	0	0	0
0	0	0	0	0	0	0	0	0	0	0	0	0	0	0	0	0	0	0	0	0	0	0	0	0	0	0	0	0	0	0	0	0	0	0	0	0	0	0	0	0	0	0	0	0	0	0	0	0	0
0	0	0	0	0	0	0	0	0	0	0	0	0	0	0	0	0	0	0	0	0	0	-0.0574671	-0.100934	-0.193393	0	0	0	0	0	0	0	0	0	0	0	0	0	0	0	0	0	0	0	0	0	0	0	0	0
0	0	0	0	0	0	0	0	0	0	0	0	0	0	0	0	0	0	0	0	0	0.0136695	-0.0655206	-0.138204	-0.176716	-0.153925	-0.0616635	-0.0269183	0	0	0	0	0	0	0	0	0	0	0	0	0	0	0	0	0	0	0	0	0	0
0	0	0	0	0	0	0	0	0	0	0	0	0	0	0	0	0	0	0	0	0	-0.0585436	-0.115521	-0.162513	-0.138048	-0.109047	-0.0608573	-0.0609488	-0.033482	-0.0715128	0	0	0	0	0	0	0	0	0	0	0	0	0	0	0	0	0	0	0	0
0	0	0	0	0	0	0	0	0	0	0	0	0	0	0	0	0	0	0	0	0.0567618	-0.0839645	-0.139279	-0.142913	-0.106177	0.00979851	-0.0249226	-0.00241249	-0.00754349	-0.0591567	-0.0568933	-0.0384545	-0.0431303	0	0	0	0	0	0	0	0	0	0	0	0	0	0	0	0	0
0	0	0	0	0	0	0	0	0	0	0	0	0	0	0	0	0	0	0	0.00493166	-0.0189154	-0.0582694	-0.0464702	-0.0583565	-0.048737	-0.010087	-0.00664892	0.00288001	0.0190604	-0.0415121	-0.096684	-0.12132	-0.100351	-0.049216	-0.0454506	0	0	0	0	0	0	0	0	0	0	0	0	0	0	0
0	0	0	0	0	0	0	0	0	0	0	0	0	0	0	0	0	0	0.0344131	-0.0159566	-0.0227974	-0.0170018	-0.0207488	-0.0337877	-0.0442258	-0.0283989	0.00364978	0.0158573	0.032839	-0.0123341	-0.106912	-0.161531	-0.117529	-0.0651521	-0.0620991	-0.0438147	0	0	0	0	0	0	0	0	0	0	0	0	0	0
0	0	0	0	0	0	0	0	0	0	0	0	0	0	0	0	0	0.139794	0.00575302	0.0278081	-0.00895148	-0.0237592	-0.0181058	-0.031918	-0.0296862	-0.00815581	0.0109315	0.0114789	0.0175813	-0.00360086	-0.0551797	-0.132668	-0.131532	-0.103198	-0.0733291	-0.0383534	0	0	0	0	0	0	0	0	0	0	0	0	0	0
0	0	0	0	0	0	0	0	0	0	0	0	0	0	0	0	0	0.0737634	0.0302386	0.0533999	0.0150282	-0.00612679	0.00500251	0.0271856	0.0332193	0.00250131	-0.00827469	0.00208071	0.0329043	0.00275425	-0.0350156	-0.0724036	-0.117416	-0.132757	-0.0818186	-0.0362745	-0.00787067	0	0	0	0	0	0	0	0	0	0	0	0	0
0	0	0	0	0	0	0	0	0	0	0	0	0	0	0	0	0.0918399	0.0322557	-0.00716918	0.0475247	0.0155092	-0.0251422	-0.00314092	0.0269733	0.0398146	0.037386	0.0397445	0.0457418	0.0111737	-0.0364174	-0.0424342	-0.0437776	-0.0864248	-0.112759	-0.0908566	-0.0345543	-0.00867421	-0.00129591	0	0	0	0	0	0	0	0	0	0	0	0
0	0	0	0	0	0	0	0	0	0	0	0	0	0	0	0	0.0887221	-0.0208626	-0.055577	0.00163095	0.0150969	0.00912093	-0.0111141	0.00863224	0.0479763	0.0616213	0.055898	0.0379476	0.0274742	-0.0304995	-0.0362712	-0.0458365	-0.0655621	-0.0593298	-0.0737897	-0.0366136	-0.00104718	0.000387154	0	0	0	0	0	0	0	0	0	0	0	0
0	0	0	0	0	0	0	0	0	0	0	0	0	0	0	0	0.0324128	-0.0744201	0.00161242	0.00613708	-0.226097	-0.302584	-0.155482	-0.0320699	-0.0458028	-0.0658707	-0.104275	-0.154773	-0.0731995	-0.0953833	-0.06021	-0.0555882	-0.0704083	-0.0699585	-0.100308	-0.0798145	-0.0459261	-0.00992755	0.0176738	0	0	0	0	0	0	0	0	0	0	0
0	0	0	0	0	0	0	0	0	0	0	0	0	0	0	0	0	0.0926673	0.0223622	-0.00494868	-0.0333458	-0.0255363	-0.0397968	-0.0467421	-0.0575482	-0.0345545	-0.0288715	-0.0197169	-0.0265599	-0.0261744	-0.0198472	-0.0104331	-0.0340133	-0.0226938	-0.0203063	-0.00694625	0.0136092	0.0230309	0.0276356	0	0	0	0	0	0	0	0	0	0	0
0	0	0	0	0	0	0	0	0	0	0	0	0	0	0	0	0	0.102283	0.0350604	-0.00137052	-0.0249624	-0.0354442	-0.0450032	-0.0288891	-0.0273358	-0.0198577	-0.0237287	-0.027228	-0.0206069	-0.0189817	-0.00437377	0.00579643	-0.00417702	0.00729569	-0.00916985	0.00593586	0.0182439	0.027591	0.034777	0	0	0	0	0	0	0	0	0	0	0
0	0	0	0	0	0	0	0	0	0	0	0	0	0	0	0	0	0.1089	0.0497935	0.014189	-0.00815532	-0.00131964	-0.010674	-0.0309108	-0.0204673	-0.0169372	-0.0134294	-0.00806156	-0.0174263	-0.0151899	0.00191162	0.0175315	0.00610269	0.0262839	0.0166333	0.0176199	0.0321619	0.0370738	0.0349087	0	0	0	0	0	0	0	0	0	0	0
0	0	0	0	0	0	0	0	0	0	0	0	0	0	0	0	0	0.111695	0.0635691	0.0235053	-0.00534366	0.0142224	0.00129021	-0.0063965	-0.0159138	-0.00252759	0.00490261	0.0175126	0.00713479	-0.0018033	0.00993534	0.0130251	0.015388	0.0424036	0.0292336	0.0262068	0.0395566	0.0418683	0.0401808	0	0	0	0	0	0	0	0	0	0	0
0	0	0	0	0	0	0	0	0	0	0	0	0	0	0	0	0	0	0.0603768	0.0302099	0.00126061	0.0128702	0.00462776	0.00540786	-0.00415824	0.00733379	0.0166321	0.0309633	0.0230242	0.00695459	0.0116527	0.0250646	0.0141304	0.0496656	0.0394401	0.0387733	0.0465421	0.0521834	0	0	0	0	0	0	0	0	0	0	0	0
0	0	0	0	0	0	0	0	0	0	0	0	0	0	0	0	0	0	0.0693896	0.0427184	0.0331908	0.00998085	0.00802396	0.0202277	0.0164127	0.0225143	0.0291388	0.0345828	0.0340882	0.0213583	0.0290342	0.0347737	0.0250846	0.0424019	0.0500559	0.0681969	0.0562621	0.0467795	0	0	0	0	0	0	0	0	0	0	0	0
0	0	0	0	0	0	0	0	0	0	0	0	0	0	0	0	0	0	0	0	0	0	0.0297438	0.0358634	0.0298517	0.0379337	0.0271551	0.0309459	0.0368533	0.0235352	0.0303714	0.00670471	0	0	0	0	0	0	0	0	0	0	0	0	0	0	0	0	0	0
0	0	0	0	0	0	0	0	0	0	0	0	0	0	0	0	0	0	0	0	0	0	0	0	0.0773072	0.0746402	0.0725565	0.0765302	0.0647513	0.0578375	0	0	0	0	0	0	0	0	0	0	0	0	0	0	0	0	0	0	0	0
0	0	0	0	0	0	0	0	0	0	0	0	0	0	0	0	0	0	0	0	0	0	0	0	0	0	0	0	0	0	0	0	0	0	0	0	0	0	0	0	0	0	0	0	0	0	0	0	0	0
0	0	0	0	0	0	0	0	0	0	0	0	0	0	0	0	0	0	0	0	0	0	0	0	0	0	0	0	0	0	0	0	0	0	0	0	0	0	0	0	0	0	0	0	0	0	0	0	0	0
0	0	0	0	0	0	0	0	0	0	0	0	0	0	0	0	0	0	0	0	0	0	0	0	0	0	0	0	0	0	0	0	0	0	0	0	0	0	0	0	0	0	0	0	0	0	0	0	0	0
0	0	0	0	0	0	0	0	0	0	0	0	0	0	0	0	0	0	0	0	0	0	0	0	0	0	0	0	0	0	0	0	0	0	0	0	0	0	0	0	0	0	0	0	0	0	0	0	0	0
0	0	0	0	0	0	0	0	0	0	0	0	0	0	0	0	0	0	0	0	0	0	0	0	0	0	0	0	0	0	0	0	0	0	0	0	0	0	0	0	0	0	0	0	0	0	0	0	0	0
0	0	0	0	0	0	0	0	0	0	0	0	0	0	0	0	0	0	0	0	0	0	0	0	0	0	0	0	0	0	0	0	0	0	0	0	0	0	0	0	0	0	0	0	0	0	0	0	0	0
0	0	0	0	0	0	0	0	0	0	0	0	0	0	0	0	0	0	0	0	0	0	0	0	0	0	0	0	0	0	0	0	0	0	0	0	0	0	0	0	0	0	0	0	0	0	0	0	0	0
0	0	0	0	0	0	0	0	0	0	0	0	0	0	0	0	0	0	0	0	0	0	0	0	0	0	0	0	0	0	0	0	0	0	0	0	0	0	0	0	0	0	0	0	0	0	0	0	0	0
0	0	0	0	0	0	0	0	0	0	0	0	0	0	0	0	0	0	0	0	0	0	0	0	0	0	0	0	0	0	0	0	0	0	0	0	0	0	0	0	0	0	0	0	0	0	0	0	0	0
0	0	0	0	0	0	0	0	0	0	0	0	0	0	0	0	0	0	0	0	0	0	0	0	0	0	0	0	0	0	0	0	0	0	0	0	0	0	0	0	0	0	0	0	0	0	0	0	0	0
0	0	0	0	0	0	0	0	0	0	0	0	0	0	0	0	0	0	0	0	0	0	0	0	0	0	0	0	0	0	0	0	0	0	0	0	0	0	0	0	0	0	0	0	0	0	0	0	0	0
0	0	0	0	0	0	0	0	0	0	0	0	0	0	0	0	0	0	0	0	0	0	0	0	0	0	0	0	0	0	0	0	0	0	0	0	0	0	0	0	0	0	0	0	0	0	0	0	0	0
0	0	0	0	0	0	0	0	0	0	0	0	0	0	0	0	0	0	0	0	0	0	0	0	0	0	0	0	0	0	0	0	0	0	0	0	0	0	0	0	0	0	0	0	0	0	0	0	0	0
0	0	0	0	0	0	0	0	0	0	0	0	0	0	0	0	0	0	0	0	0	0	0	0	0	0	0	0	0	0	0	0	0	0	0	0	0	0	0	0	0	0	0	0	0	0	0	0	0	0
0	0	0	0	0	0	0	0	0	0	0	0	0	0	0	0	0	0	0	0	0	0	0	0	0	0	0	0	0	0	0	0	0	0	0	0	0	0	0	0	0	0	0	0	0	0	0	0	0	0
0	0	0	0	0	0	0	0	0	0	0	0	0	0	0	0	0	0	0	0	0	0	0	0	0	0	0	0	0	0	0	0	0	0	0	0	0	0	0	0	0	0	0	0	0	0	0	0	0	0
0	0	0	0	0	0	0	0	0	0	0	0	0	0	0	0	0	0	0	0	0	0	0	0	0	0	0	0	0	0	0	0	0	0	0	0	0	0	0	0	0	0	0	0	0	0	0	0	0	0
0	0	0	0	0	0	0	0	0	0	0	0	0	0	0	0	0	0	0	0	0	0	0	0	0	0	0	0	0	0	0.0399516	-0.0205603	-0.0461693	-0.027294	-0.0295824	-0.0350012	-0.0203485	0	0	0	0	0	0	0	0	0	0	0	0	0
0	0	0	0	0	0	0	0	0	0	0	0	0	0	0	0	0	0	0	0	0	0	0	0	0	0.0826874	0.0460471	0.067989	0.057985	-0.00152067	-0.0108727	-0.0640585	-0.0909439	-0.0794083	-0.0753029	-0.0602266	-0.0445065	-0.0392046	-0.027127	0	0	0	0	0	0	0	0	0	0	0
0	0	0	0	0	0	0	0	0	0	0	0	0	0	0	0	0	0	0	0	0	0	0	0	0.0279011	-0.00753765	-0.0174886	0.0397599	0.00935194	0.00711736	-0.0448924	-0.0405444	-0.145076	-0.180487	-0.167044	-0.10511	-0.0628148	-0.0538824	-0.0494746	-0.0347791	0	0	0	0	0	0	0	0	0	0
0	0	0	0	0	0	0	0	0	0	0	0	0	0	0	0	0	0	0	0	0	0	0	0.0843661	0.0419112	0.00580854	0.0425457	0.0613872	0.0095715	-0.0366731	-0.0534715	-0.0272667	-0.0350873	-0.125273	-0.247498	-0.253692	-0.172193	-0.0965583	-0.0722113	-0.0558551	-0.0422561	0	0	0	0	0	0	0	0	0
0	0	0	0	0	0	0	0	0	0	0	0	0	0	0	0	0	0	0	0	0	0	0	0.0471737	0.0112093	0.0072063	0.0698205	0.00268392	-0.00949809	-0.0449082	-0.0504989	-0.0228876	-0.0356887	-0.0292825	-0.174431	-0.237535	-0.213687	-0.141117	-0.0875963	-0.0636821	-0.0449296	-0.0368136	-0.0245703	0	0	0	0	0	0	0
0	0	0	0	0	0	0	0	0	0	0	0	0	0	0	0	0	0	0	0	0	0	0	0.0953109	-0.0440974	-0.0520254	0.048216	0.0358053	-0.0407925	-0.0668672	-0.0267136	-0.0103495	-0.0326086	-0.0332319	-0.065583	-0.149087	-0.144571	-0.164235	-0.159185	-0.0954974	-0.0601869	-0.0429463	-0.0308653	-0.0158044	0	0	0	0	0	0
0	0	0	0	0	0	0	0	0	0	0	0	0	0	0	0	0	0	0	0	0	0	0	0.0633258	-0.054495	-0.0474783	-0.0542448	-0.0392779	-0.00477644	-0.00393185	-0.0226117	0.00888697	-0.0646833	-0.0594297	-0.0397345	-0.0675781	-0.106004	-0.0899081	-0.0649767	-0.0528432	-0.0441339	-0.0395487	-0.00835966	0.00375849	0.00866631	0	0	0	0	0
0	0	0	0	0	0	0	0	0	0	0	0	0	0	0	0	0	0	0	0	0	0	0	0.0777114	0.0199088	-0.076182	-0.0825141	-0.0222208	0.051758	-0.0931362	-0.0375353	0.0013966	-0.0537153	-0.0505949	-0.0398161	-0.069934	-0.0982871	-0.0806044	-0.0637596	-0.0391097	-0.0178709	-0.00528713	-0.00135063	0.0209601	0.0282104	0.025618	0	0	0	0
0	0	0	0	0	0	0	0	0	0	0	0	0	0	0	0	0	0	0	0	0	0	0	0	0.0440883	-0.102339	-0.102513	-0.0147606	0.0201451	-0.149991	-0.0175261	0.01285	-0.0420864	-0.0484224	-0.0488656	-0.0650436	-0.0889288	-0.0751538	-0.0646817	-0.031045	0.00198683	0.0340175	0.0373547	0.0398156	0.0528894	0.0343643	0	0	0	0
0	0	0	0	0	0	0	0	0	0	0	0	0	0	0	0	0	0	0	0	0	0	0	0	0.063086	-0.0998569	-0.152925	-0.0213681	-0.122191	-0.0877069	0.00610437	0.0146415	-0.0297366	-0.0422385	-0.053021	-0.060555	-0.0839642	-0.0833889	-0.060511	-0.0196785	0.0115172	0.0492543	0.0805433	0.072337	0.0799309	0.060201	0	0	0	0
0	0	0	0	0	0	0	0	0	0	0	0	0	0	0	0	0	0	0	0	0	0	0	0	0.0674927	-0.0752073	-0.145691	-0.134581	-0.15674	-0.0340721	0.0262299	-0.0079884	-0.0126088	-0.0226237	-0.0639985	-0.0516792	-0.0660752	-0.0802339	-0.0555811	-0.0182169	0.0242017	0.0853134	0.106382	0.0909019	0.126584	0.0858234	0	0	0	0
0	0	0	0	0	0	0	0	0	0	0	0	0	0	0	0	0	0	0	0	0	0	0	0	0.0693503	-0.0245809	-0.0447168	-0.0634184	-0.0460084	-0.0603025	-0.0716935	-0.100682	-0.0426644	-0.0363534	-0.0625612	-0.0527034	-0.0634854	-0.0729321	-0.0461975	0.00255871	0.0483378	0.108697	0.150194	0.116451	0.157106	0.123401	0	0	0	0
0	0	0	0	0	0	0	0	0	0	0	0	0	0	0	0	0	0	0	0	0	0	0	0	0	0.00948509	-0.0430355	-0.021305	-0.0718604	-0.187817	-0.173242	-0.168678	-0.11597	-0.0999372	-0.0932614	-0.0507938	-0.0612078	-0.066979	-0.0419948	0.00743895	0.0696577	0.12814	0.168269	0.131769	0.168992	0.130995	0	0	0	0
0	0	0	0	0	0	0	0	0	0	0	0	0	0	0	0	0	0	0	0	0	0	0	0	0	0	0.0143527	0.00950526	-0.0656688	-0.176348	-0.214489	-0.264122	-0.223707	-0.221598	-0.155473	-0.0633515	-0.0654618	-0.0545522	-0.0258407	0.0337679	0.0852365	0.145627	0.178521	0.162206	0	0	0	0	0	0
0	0	0	0	0	0	0	0	0	0	0	0	0	0	0	0	0	0	0	0	0	0	0	0	0	0	0	-0.00929352	0.0143176	0.00925507	0.0495449	0.0755016	0.045001	0.0799085	0.0778934	0.0748341	0.0428076	0.0556893	0.0614154	0.107151	0.118197	0.0672963	0.0514862	0	0	0	0	0	0	0
0	0	0	0	0	0	0	0	0	0	0	0	0	0	0	0	0	0	0	0	0	0	0	0	0	0	0	0.0306202	0.0337304	0.0409002	0.0705398	0.0884062	0.0545319	0.0741643	0.0928269	0.0802498	0.0680767	0.069272	0.120578	0.158872	0.158026	0.156244	0	0	0	0	0	0	0	0
0	0	0	0	0	0	0	0	0	0	0	0	0	0	0	0	0	0	0	0	0	0	0	0	0	0	0	0	0.0493519	0.0772244	0.0913077	0.113934	0.10974	0.118958	0.139991	0.129957	0.125471	0.134751	0.149978	0.173586	0.176363	0	0	0	0	0	0	0	0	0
0	0	0	0	0	0	0	0	0	0	0	0	0	0	0	0	0	0	0	0	0	0	0	0	0	0	0	0	0	0.0773109	0.119208	0.137596	0.162691	0.185529	0.170364	0.166657	0.178861	0.186684	0.181341	0.187503	0	0	0	0	0	0	0	0	0	0
0	0	0	0	0	0	0	0	0	0	0	0	0	0	0	0	0	0	0	0	0	0	0	0	0	0	0	0	0	0	0.0906241	0.12594	0.123454	0.159724	0.166929	0.165323	0.186162	0.192176	0	0	0	0	0	0	0	0	0	0	0	0
0	0	0	0	0	0	0	0	0	0	0	0	0	0	0	0	0	0	0	0	0	0	0	0	0	0	0	0	0	0	0	0	0	0	0	0	0	0	0	0	0	0	0	0	0	0	0	0	0	0
0	0	0	0	0	0	0	0	0	0	0	0	0	0	0	0	0	0	0	0	0	0	0	0	0	0	0	0	0	0	0	0	0	0	0	0	0	0	0	0	0	0	0	0	0	0	0	0	0	0
0	0	0	0	0	0	0	0	0	0	0	0	0	0	0	0	0	0	0	0	0	0	0	0	0	0	0	0	0	0	0	0	0	0	0	0	0	0	0	0	0	0	0	0	0	0	0	0	0	0
0	0	0	0	0	0	0	0	0	0	0	0	0	0	0	0	0	0	0	0	0	0	0	0	0	0	0	0	0	0	0	0	0	0	0	0	0	0	0	0	0	0	0	0	0	0	0	0	0	0
0	0	0	0	0	0	0	0	0	0	0	0	0	0	0	0	0	0	0	0	0	0	0	0	0	0	0	0	0	0	0	0	0	0	0	0	0	0	0	0	0	0	0	0	0	0	0	0	0	0
0	0	0	0	0	0	0	0	0	0	0	0	0	0	0	0	0	0	0	0	0	0	0	0	0	0	0	0	0	0	0	0	0	0	0	0	0	0	0	0	0	0	0	0	0	0	0	0	0	0
0	0	0	0	0	0	0	0	0	0	0	0	0	0	0	0	0	0	0	0	0	0	0	0	0	0	0	0	0	0	0	0	0	0	0	0	0	0	0	0	0	0	0	0	0	0	0	0	0	0
0	0	0	0	0	0	0	0	0	0	0	0	0	0	0	0	0	0	0	0	0	0	0	0	0	0	0	0	0	0	0	0	0	0	0	0	0	0	0	0	0	0	0	0	0	0	0	0	0	0
0	0	0	0	0	0	0	0	0	0	0	0	0	0	0	0	0	0	0	0	0	0	0	0	0	0	0	0	0	0	0	0	0	0	0	0	0	0	0	0	0	0	0	0	0	0	0	0	0	0
0	0	0	0	0	0	0	0	0	0	0	0	0	0	0	0	0	0	0	0	0	0	0	0	0	0	0	0	0	0	0	0	0	0	0	0	0	0	0	0	0	0	0	0	0	0	0	0	0	0
0	0	0	0	0	0	0	0	0	0	0	0	0	0	0	0	0	0	0	0	0	0	0	0	0	0	0	0	0	0	0	0	0	0	0	0	0	0	0	0	0	0	0	0	0	0	0	0	0	0
0	0	0	0	0	0	0	0	0	0	0	0	0	0	0	0	0	0	0	0	0	0	0	0	0	0	0	0	0	0	0	0	0	0	0	0	0	0	0	0	0	0	0	0	0	0	0	0	0	0
0	0	0	0	0	0	0	0	0	0	0	0	0	0	0	0	0	0	0	0	0	0	0	0	0	0	0	0	0	0	0	0	0	0	0	0	0	0	0	0	0	0	0	0	0	0	0	0	0	0
0	0	0	0	0	0	0	0	0	0	0	0	0	0	0	0	0	0	0	0	0	0	0	0	0	0	0	0	0	0	0	0	0	0	0	0	0	0	0	0	0	0	0	0	0	0	0	0	0	0
0	0	0	0	0	0	0	0	0	0	0	0	0	0	0	0	0	0	0	0	0	0	0	0	0	0	0	0	0	0	0	0	0	0	0	0	0	0	0	0	0	0	0	0	0	0	0	0	0	0
0	0	0	0	0	0	0	0	0	0	0	0	0	0	0	0	0	0	0	0	0	0	0	0	0	0	0	0	0	0	0	0	0	0	0	0	0	0	0	0	0	0	0	0	0	0	0	0	0	0
0	0	0	0	0	0	0	0	0	0	0	0	0	0	0	0	0	0	0	0	0	0	0	0	0	0	0	0	0	0	0	0	0	0	0	0	0	0	0	0	0	0	0	0	0	0	0	0	0	0
0	0	0	0	0	0	0	0	0	0	0	0	0	0	0	0	0	0	0	0	0	0	0	0	0	0	0	0	0	0	0	0	0	0	0	0	0	0	0	0	0	0	0	0	0	0	0	0	0	0
0	0	0	0	0	0	0	0	0	0	0	0	0	0	0	0	0	0	0	0	0	0	0	0	0	0	0	0	0	0	0	0	0	0	0	0	0	0	0	0	0	0	0	0	0	0	0	0	0	0
0	0	0	0	0	0	0	0	0	0	0	0	0	0	0	0	0	0	0	0	0	0	0	0	0	0	0	0	0	0	0	0	0	0	0	0	0	0	0	0	0	0	0	0	0	0	0	0	0	0
0	0	0	0	0	0	0	0	0	0	0	0	0	0	0	0	0	0	0	0	0	0	0	0	0	0	0	0	0	0	0	0	0	0	0	0	0	0	0	0	0	0	0	0	0	0	0	0	0	0
0	0	0	0	0	0	0	0	0	0	0	0	0	0	0	0	0	0	0	0	0	0	0	0	0	0	0	0	0	0	0	0	0	0	0	0	0	0	0	0	0	0	0	0	0	0	0	0	0	0
0	0	0	0	0	0	0	0	0	0	0	0	0	0	0	0	0	0	0	0	0	0	0	0	0	0	0	0	0	0	0	0	0	0	0	0	0	0	0	0	0	0	0	0	0	0	0	0	0	0
0	0	0	0	0	0	0	0	0	0	0	0	0	0	0	0	0	0	0	0	0	0	0	0	0	0	0	0	0	0	0	0	0	0	0	0	0	0	0	0	0	0	0	0	0	0	0	0	0	0
0	0	0	0	0	0	0	0	0	0	0	0	0	0	0	0	0	0	0	0	0	0	0	0	0	0	0	0	0	0	0	0	0	0	0	0	0	0	0	0	0	0	0	0	0	0	0	0	0	0
0	0	0	0	0	0	0	0	0	0	0	0	0	0	0	0	0	0	0	0	0	0	0	0	0	0	0	0	0	0	0	0	0	0	0	0	0	0	0	0	0	0	0	0	0	0	0	0	0	0
0	0	0	0	0	0	0	0	0	0	0	0	0	0	0	0	0	0	0	0	0	0	0	0	0	0	0	0	0	0	0	0	0	0	0	0	0	0	0	0	0	0	0	0	0	0	0	0	0	0
0	0	0	0	0	0	0	0	0	0	0	0	0	0	0	0	0	0	0	0	0	0	0	0	0	0	0	0	0	0	0	0	0	0	0	0	0	0	0	0	0	0	0	0	0	0	0	0	0	0
0	0	0	0	0	0	0	0	0	0	0	0	0	0	0	0	0	0	0	0	0	0	0	0	0	0	0	0	0	0	0	0	0	0	0.30897	0.289607	0.303232	0.292638	0.275845	0.238684	0.199847	0.159228	0.0515467	0	0	0	0	0	0	0
0	0	0	0	0	0	0	0	0	0	0	0	0	0	0	0	0	0	0	0	0	0	0	0	0	0	0	0	0	0	0	0	0	0.297603	0.273163	0.252727	0.249453	0.230973	0.22028	0.20098	0.165954	0.143992	0.0563916	0.0223244	0	0	0	0	0	0
0	0	0	0	0	0	0	0	0	0	0	0	0	0	0	0	0	0	0	0	0	0	0	0	0	0	0	0	0	0	0	0	0.242196	0.250395	0.249015	0.237366	0.221971	0.1894	0.151143	0.0744759	0.035053	0.0581966	0.0464776	-0.00777472	0.00281566	0	0	0	0	0
0	0	0	0	0	0	0	0	0	0	0	0	0	0	0	0	0	0	0	0	0	0	0	0	0	0	0	0	0	0	0	0.176245	0.110787	0.12416	0.123477	0.155912	0.166244	0.145115	0.125603	0.101175	0.0693061	-0.0288068	-0.0313305	-0.0521907	-0.0163524	0.00227515	0	0	0	0
0	0	0	0	0	0	0	0	0	0	0	0	0	0	0	0	0	0	0	0	0	0	0	0	0	0	0	0	0	0	0.283461	0.205533	0.130317	0.115816	0.0964359	0.0928687	0.101103	0.0902152	0.0845737	0.0832519	0.0837172	0.0848972	0.0733191	-0.042169	-0.0803154	-0.0262921	-0.00929347	0	0	0
0	0	0	0	0	0	0	0	0	0	0	0	0	0	0	0	0	0	0	0	0	0	0	0	0	0	0	0	0	0.315659	0.299818	0.248596	0.156757	0.114064	0.0797928	0.0636921	0.0731863	0.0602179	0.0566132	0.0613988	0.0632401	0.0835558	0.0831781	-0.0124082	-0.0513843	-0.0688718	-0.0392312	-0.0193261	0	0
0	0	0	0	0	0	0	0	0	0	0	0	0	0	0	0	0	0	0	0	0	0	0	0	0	0	0	0	0	0.201937	0.167256	0.0936068	-0.0692255	-0.0726264	-0.0117464	0.0239977	0.0759818	0.0941391	0.0981431	0.129875	0.138513	0.113481	-0.0279924	-0.0908625	-0.0428649	-0.0343267	0.0160207	0.100855	0	0
0	0	0	0	0	0	0	0	0	0	0	0	0	0	0	0	0	0	0	0	0	0	0	0	0	0	0	0	0	0.18992	0.182831	0.148352	0.0978579	0.0837299	0.0553151	0.0359224	0.0302335	0.00947529	0.0110856	0.0315139	0.0256449	0.00426965	-0.0179537	-0.0244987	-0.031757	-0.034525	-0.0376131	-0.025316	-0.0264614	0
0	0	0	0	0	0	0	0	0	0	0	0	0	0	0	0	0	0	0	0	0	0	0	0	0	0	0	0	0	0.137143	0.125889	0.114991	0.0764321	0.0679542	0.0484689	0.0240641	0.00419652	-0.0240669	0.00761752	0.0139449	0.00273035	0.00539019	0.00442823	0.0112607	-0.0105978	-0.0158473	-0.0203604	-0.00591462	-0.000828896	-0.0107087
0	0	0	0	0	0	0	0	0	0	0	0	0	0	0	0	0	0	0	0	0	0	0	0	0	0	0	0	0	0.123726	0.12366	0.0988076	0.0784278	0.0679004	0.0420706	0.0302094	0.0205978	-0.0345558	-0.0155972	0.0177131	0.00774504	-0.00586539	-0.000402053	0.0051943	0.00293047	-0.00266793	-0.0171916	-0.00337758	0.00845694	0.00608825
0	0	0	0	0	0	0	0	0	0	0	0	0	0	0	0	0	0	0	0	0	0	0	0	0	0	0	0	0	0.119513	0.11808	0.0974205	0.0797868	0.0705548	0.046355	0.0208245	0.0258657	-0.0276315	-0.0202184	0.017222	-0.000213703	-0.012372	-0.026832	0.0134363	0.00675077	0.00372932	0.0057345	0.00740155	0.000570265	0.01409
0	0	0	0	0	0	0	0	0	0	0	0	0	0	0	0	0	0	0	0	0	0	0	0	0	0	0	0	0	0.130144	0.135384	0.108939	0.0656027	0.0594354	0.0329552	0.00379702	0.0139596	-0.0430307	-0.00690427	0.0114747	0.0204419	-0.0174991	-0.00473536	0.00881402	-0.0144953	0.0157205	0.0199655	0.0136598	0.0285754	0.0214234
0	0	0	0	0	0	0	0	0	0	0	0	0	0	0	0	0	0	0	0	0	0	0	0	0	0	0	0	0	0	0.126772	0.120826	0.0996462	0.0538723	0.00164127	-0.0169805	-0.0479292	-0.0250446	0.0122848	-0.0349423	0.0034649	-0.0316787	-0.0406798	-0.0235797	-0.026558	-0.00691037	0.0251071	-0.00872898	0.0161972	0.0281788
0	0	0	0	0	0	0	0	0	0	0	0	0	0	0	0	0	0	0	0	0	0	0	0	0	0	0	0	0	0	0.121375	0.124687	0.0836714	0.0614032	-0.0155156	-0.0477723	-0.051815	-0.0251755	0.00654952	0.0228313	0.00735675	-0.0326211	-0.035866	-0.0470594	-0.036889	-0.0302528	0.00367589	-0.0104305	0.000139997	0.015917
0	0	0	0	0	0	0	0	0	0	0	0	0	0	0	0	0	0	0	0	0	0	0	0	0	0	0	0	0	0	0	0.100039	0.0579741	0.0765047	-0.0220147	-0.0402396	-0.0411429	-0.0507235	-0.040152	0.0138156	0.0119687	-0.0312503	-0.0432269	-0.106604	-0.0679259	-0.0379984	-0.00637189	-0.00015689	0.0121649	0.00856845
0	0	0	0	0	0	0	0	0	0	0	0	0	0	0	0	0	0	0	0	0	0	0	0	0	0	0	0	0	0	0	0	0.0402089	0.0430693	0.0656369	0.0115547	0.0115562	-0.0086746	-0.0190873	-0.0170246	-0.0479097	-0.0869567	-0.0100117	0.0344987	0.0152644	0.0182569	-0.0324461	-0.00849674	-0.015257	-0.0422357
0	0	0	0	0	0	0	0	0	0	0	0	0	0	0	0	0	0	0	0	0	0	0	0	0	0	0	0	0	0	0	0	0	0.0438723	0.0674049	0.0332304	0.0104612	-0.0270708	-0.0168394	-0.020839	-0.0501384	-0.111675	-0.0292753	0.00728732	-0.0161381	-0.0117672	-0.0402235	-0.0215033	-0.0121075	-0.0481623
0	0	0	0	0	0	0	0	0	0	0	0	0	0	0	0	0	0	0	0	0	0	0	0	0	0	0	0	0	0	0	0	0	0	0.0636134	0.0824388	0.0557916	0.0105071	-0.0195925	-0.0768775	-0.0619461	-0.0362368	-0.0602605	-0.0821393	-0.0722607	-0.094659	-0.10252	-0.12292	-0.110087	-0.127031
0	0	0	0	0	0	0	0	0	0	0	0	0	0	0	0	0	0	0	0	0	0	0	0	0	0	0	0	0	0	0	0	0	0	0	0.0930457	0.0756261	0.0224945	-0.0202914	-0.0388438	-0.0289187	-0.0737708	-0.0607535	-0.0886712	-0.0601548	-0.0849605	-0.126287	-0.149529	-0.125215	-0.086322
0	0	0	0	0	0	0	0	0	0	0	0	0	0	0	0	0	0	0	0	0	0	0	0	0	0	0	0	0	0	0	0	0	0	0	0	0.120414	0.0487082	0.00760952	-0.0116168	-0.0609365	-0.0501696	-0.0433928	-0.0513018	-0.036643	-0.0862222	-0.159671	-0.15269	-0.0935764	-0.089947
0	0	0	0	0	0	0	0	0	0	0	0	0	0	0	0	0	0	0	0	0	0	0	0	0	0	0	0	0	0	0	0	0	0	0	0	0	0	0	-0.00286339	-0.00736404	-0.0187845	-0.0498798	-0.0551941	-0.0426874	-0.138326	-0.150335	-0.100048	-0.0587722	0
0	0	0	0	0	0	0	0	0	0	0	0	0	0	0	0	0	0	0	0	0	0	0	0	0	0	0	0	0	0	0	0	0	0	0	0	0	0	0	0	0	0	0	0	0	0	0	0	0	0
0	0	0	0	0	0	0	0	0	0	0	0	0	0	0	0	0	0	0	0	0	0	0	0	0	0	0	0	0	0	0	0	0	0	0	0	0	0	0	0	0	0	0	0	0	0	0	0	0	0
0	0	0	0	0	0	0	0	0	0	0	0	0	0	0	0	0	0	0	0	0	0	0	0	0	0	0	0	0	0	0	0	0	0	0	0	0	0	0	0	0	0	0	0	0	0	0	0	0	0
0	0	0	0	0	0	0	0	0	0	0	0	0	0	0	0	0	0	0	0	0	0	0	0	0	0	0	0	0	0	0	0	0	0	0	0	0	0	0	0	0	0	0	0	0	0	0	0	0	0
0	0	0	0	0	0	0	0	0	0	0	0	0	0	0	0	0	0	0	0	0	0	0	0	0	0	0	0	0	0	0	0	0	0	0	0	0	0	0	0	0	0	0	0	0	0	0	0	0	0
0	0	0	0	0	0	0	0	0	0	0	0	0	0	0	0	0	0	0	0	0	0	0	0	0	0	0	0	0	0	0	0	0	0	0	0	0	0	0	0	0	0	0	0	0	0	0	0	0	0
0	0	0	0	0	0	0	0	0	0	0	0	0	0	0	0	0	0	0	0	0	0	0	0	0	0	0	0	0	0	0	0	0	0	0	0	0	0	0	0	0	0	0	0	0	0	0	0	0	0
0	0	0	0	0	0	0	0	0	0	0	0	0	0	0	0	0	0	0	0	0	0	0	0	0	0	0	0	0	0	0	0	0	0	0	0	0	0	0	0	0	0	0	0	0	0	0	0	0	0
0	0	0	0	0	0	0	0	0	0	0	0	0	0	0	0	0	0	0	0	0	0	0	0	0	0	0	0	0	0	0	0	0	0	0	0	0	0	0	0	0	0	0	0	0	0	0	0	0	0
0	0	0	0	0	0	0	0	0	0	0	0	0	0	0	0	0	0	0	0	0	0	0	0	0	0	0	0	0	0	0	0	0	0	0	0	0	0	0	0	0	0	0	0	0	0	0	0	0	0
0	0	0	0	0	0	0	0	0	0	0	0	0	0	0	0	0	0	0	0	0	0	0	0	0	0	0	0	0	0	0	0	0	0	0	0	0	0	0	0	0	0	0	0	0	0	0	0	0	0
0	0	0	0	0	0	0	0	0	0	0	0	0	0	0	0	0	0	0	0	0	0	0	0	0	0	0	0	0	0	0	0	0	0	0	0	0	0	0	0	0	0	0	0	0	0	0	0	0	0
0	0	0	0	0	0	0	0	0	0	0	0	0	0	0	0	0	0	0	0	0	0	0	0	0	0	0	0	0	0	0	0	0	0	0	0	0	0	0	0	0	0	0	0	0	0	0	0	0	0
0	0	0	0	0	0	0	0	0	0	0	0	0	0	0	0	0	0	0	0	0	0	0	0	0	0	0	0	0	0	0	0	0	0	0	0	0	0	0	0	0	0	0	0	0	0	0	0	0	0
0	0	0	0	0	0	0	0	0	0	0	0	0	0	0	0	0	0	0	0	0	0	0	0	0	0	0	0	0	0	0	0	0	0	0	0	0	0	0	0	0	0	0	0	0	0	0	0	0	0
0	0	0	0	0	0	0	0	0	0	0	0	0	0	0	0	0	0	0	0	0	0	0	0	0	0	0	0	0	0	0	0	0	0	0	0	0	0	0	0	0	0	0	0	0	0	0	0	0	0
0	0	0	0	0	0	0	0	0	0	0	0	0	0	0	0	0	0	0	0	0	0	0	0	0	0	0	0	0	0	0	0	0	0	0	0	0	0	0	0	0	0	0	0	0	0	0	0	0	0
0	0	0	0	0	0	0	0	0	0	0	0	0	0	0	0	0	0	0	0	0	0	0	0	0	0	0	0	0	0	0	0	0	0	0	0	0	0	0	0	0	0	0	0	0	0	0	0	0	0
0	0	0	0	0	0	0	0	0	0	0	0	0	0	0	0	0	0	0	0	0	0	0	0	0	0	0	0	0	0	0	0	0	0	0	0	0	0	0	0	0	0	0	0	0	0	0	0	0	0
0	0	0	0	0	0	0	0	0	0	0	0	0	0	0	0	0	0	0	0	0	0	0	0	0	0	0	0	0	0	0	0	0	0	0	0	0	0	0	0	0	0	0	0	0	0	0	0	0	0
0	0	0	0	0	0	0	0	0	0	0	0	0	0	0	0	0	0	0	0	0	0	0	0	0	0	0	0	0	0	0	0	0	0	0	0	0	0	0	0	0	0	0	0	0	0	0	0	0	0
0	0	0	0	0	0	0	0	0	0	0	0	0	0	0	0	0	0	0	0	0	0	0	0	0	0	0	0	0	0	0	0	0	0	0	0	0	0	0	0	0	0	0	0	0	0	0	0	0	0
0	0	0	0	0	0	0	0	0	0	0	0	0	0	0	0	0	0	0	0	0	0	0	0	0	0	0	0	0	0	0	0	0	0	0	0	0	0	0	0	0	0	0	0	0	0	0	0	0	0
0	0	0	0	0	0	0	0	0	0	0	0	0	0	0	0	0	0	0	0	0	0	0	0	0	0	0	0	0	0	0	0	0	0	0	0	0	0	0	0	0	0	0	0	0	0	0	0	0	0
0	0	0	0	0	0	0	0	0	0	0	0	0	0	0	0	0	0	0	0	0	0	0	0	0	0	0	0	0	0	0	0	0	0	0	0	0	0	0	0	0	0	0	0	0	0	0	0	0	0
0	0	0	0	0	0	0	0	0	0	0	0	0	0	0	0	0	0	0	0	0	0	0	0	0	0	0	0	0	0	0	0	0	0	0	0	0	0	0	0	0	0	0	0	0	0	0	0	0	0
0	0	0	0	0	0	0	0	0	0	0	0	0	0	0	0	0	0	0	0	0	0	0	0	0	0	0	0	0	0	0	0	0	0	0	0	0	0	0	0	0	0	0	0	0	0	0	0	0	0
0	0	0	0	0	0	0	0	0	0	0	0	0	0	0	0	0	0	0	0	0	0	0	0	0	0	0	0	0	0	0	0	0	0	0	0	0	0	0	0	0	0	0	0	0	0	0	0	0	0
0	0	0	0	0	0	0	0	0	0	0	0	0	0	0	0	0	0	0	0	0	0	0	0	0	0	0	0	0	0	0	0	0	0	0	0	0	0	0	0	0	0	0	0	0	0	0	0	0	0
0	0	0	0	0	0	0	0	0	0	0	0	0	0	0	0	0	0	0	0	0	0	0	0	0	0	0	0	0	0	0	0	0	0	0	0	0	0	0	0	0	0	0	0	0	0	0	0	0	0
0	0	0	0	0	0	0	0	0	0	0	0	0	0	0	0	0	0	0	0	0	0	0	0	0	0	0	0	0	0	0	0	0	0	0	0	0	0	0	0	0	0	0	0	0	0	0	0	0	0
0	0	0	0	0	0	0	0	0	0	0	0	0	0	0	0	0	0	0	0	0	0	0	0	0	0	0	0	0	0	0	0	0	0	0	0	0	0	0	0	0	0	0	0	0	0	0	0	0	0
0	0	0	0	0	0	0	0	0	0	0	0	0	0	0	0	0	0	0	0	0	0	0	0	0	0	0	0	0	0	0	0	0	0	0	0	0	0	0	0	0	0	0	0	0	0	0	0	0	0
0	0	0	0	0	0	0	0	0	0	0	0	0	0	0	0	0	0	0	0	0	0	0	0	0	0	0	0	0	0	0	0	0	0	0	0	0	0	0	0	0	0	0	0	0	0	0	0	0	0
0	0	0	0	0	0	0	0	0	0	0	0	0	0	0	0	0	0	0	0	0	0	0	0	0	0	0	0	0	0	0	0	0	0	0	0	0	0	0	0	0	0	0	0	0	0	0	0	0	0
0	0	0	0	0	0	0	0	0	0	0	0	0	0	0	0	0	0	0	0	0	0	0	0	0	0	0	0	0	0	0	0	0	0	0	0	0	0	0	0	0	0	0	0	0	0	0	0	0	0
0	0	0	0	0	0	0	0	0	0	0	0	0	0	0	0	0	0	0	0	0	0	0	0	0	0	0	0	0	0.0103446	-0.063141	-0.0852529	-0.100626	-0.0851946	-0.0872325	-0.0432428	0.042859	0.00104635	-0.0199673	0	0	0	0	0	0	0	0	0	0	0
0	0	0	0	0	0	0	0	0	0	0	0	0	0	0	0	0	0	0	0	0	0	0	0	0	0	0	0	0.0919221	-0.0130769	-0.0459604	-0.0707261	-0.120499	-0.109903	-0.085591	-0.0135452	0.0177914	0.0464822	0.0597791	0.039889	-0.00455768	0	0	0	0	0	0	0	0	0
0	0	0	0	0	0	0	0	0	0	0	0	0	0	0	0	0	0	0	0	0	0	0	0	0	0	0.140577	0.0565166	0.0465266	0.00175058	-0.016069	-0.0596848	-0.0806928	-0.0367461	-0.00469869	0.0380044	0.0215142	0.0744148	0.0542326	0.0195798	0.00117856	-0.0173415	0	0	0	0	0	0	0	0
0	0	0	0	0	0	0	0	0	0	0	0	0	0	0	0	0	0	0	0	0	0	0	0	0	0.164066	0.147061	0.161643	0.105733	0.0240112	0.0558388	0.0690161	0.0446059	0.0696027	0.0693237	0.0820636	0.100659	0.0389487	-0.0216319	-0.0189579	-0.0392103	-0.0498457	-0.0351618	0	0	0	0	0	0	0
0	0	0	0	0	0	0	0	0	0	0	0	0	0	0	0	0	0	0	0	0	0	0	0	0	0.07976	0.0952858	0.0772827	0.122712	0.106029	0.0615394	0.0696448	0.0596328	0.0805483	0.0255884	0.0333896	0.0017903	-0.0521562	-0.0950368	-0.141957	-0.129599	-0.101398	-0.0583024	-0.0230757	0	0	0	0	0	0
0	0	0	0	0	0	0	0	0	0	0	0	0	0	0	0	0	0	0	0	0	0	0	0	0.0439351	0.044643	0.0726843	0.0997834	0.103668	0.0849414	0.0687585	0.0851673	0.0844708	0.062398	0.0340473	0.0199641	-0.0339731	-0.0594902	-0.099274	-0.156206	-0.174038	-0.115085	-0.0602827	-0.0222695	-0.0201252	0	0	0	0	0
0	0	0	0	0	0	0	0	0	0	0	0	0	0	0	0	0	0	0	0	0	0	0	0	-0.00616901	-0.0932958	-0.0387905	0.0160212	0.0565084	0.0432423	0.0695339	0.077953	0.0540244	0.0402746	0.0223405	-0.0246424	-0.0582203	-0.0855602	-0.119807	-0.154943	-0.184486	-0.123671	-0.0533204	-0.0235712	-0.0159937	0	0	0	0	0
0	0	0	0	0	0	0	0	0	0	0	0	0	0	0	0	0	0	0	0	0	0	0	0.0593479	-0.0476524	-0.177501	-0.188902	-0.129209	-0.124847	-0.126012	-0.079437	-0.0378912	-0.0845594	-0.139486	-0.189103	-0.145528	-0.111474	-0.125013	-0.142328	-0.162181	-0.163421	-0.114542	-0.0466866	-0.0105743	-0.00507286	-0.00455664	0	0	0	0
0	0	0	0	0	0	0	0	0	0	0	0	0	0	0	0	0	0	0	0	0	0	0	0.00808953	-0.0600314	-0.112768	-0.120918	-0.106731	-0.0831562	-0.100595	-0.0727511	-0.0588766	-0.125257	-0.128561	-0.133149	-0.158604	-0.143179	-0.129783	-0.112384	-0.0943639	-0.0815159	-0.0598054	-0.0216931	-0.00983733	-0.00688119	-0.00489499	0	0	0	0
0	0	0	0	0	0	0	0	0	0	0	0	0	0	0	0	0	0	0	0	0	0	0.06841	0.0302763	-0.0420208	-0.0765121	-0.105373	-0.159055	-0.160983	-0.136658	-0.10285	-0.114703	-0.151483	-0.157333	-0.161576	-0.151877	-0.116583	-0.104745	-0.0744261	-0.0554103	-0.0388687	-0.0274074	-0.00369052	0.00585018	0.0113428	0.0129284	0	0	0	0
0	0	0	0	0	0	0	0	0	0	0	0	0	0	0	0	0	0	0	0	0	0	0.0568355	0.0501432	0.00199404	-0.055646	-0.113386	-0.16499	-0.218565	-0.223666	-0.173115	-0.172271	-0.211314	-0.2077	-0.181489	-0.156757	-0.103805	-0.0723332	-0.0599731	-0.0493015	-0.0359241	-0.0202395	-0.00473942	-2.2287e-05	0.00789339	0.00356395	0	0	0	0
0	0	0	0	0	0	0	0	0	0	0	0	0	0	0	0	0	0	0	0	0	0	0.105435	0.0639636	0.029117	-0.00487259	-0.0524445	-0.0939588	-0.10837	-0.143894	-0.140224	-0.153839	-0.165942	-0.157213	-0.143074	-0.0987318	-0.0534808	-0.0311377	-0.0114622	-0.000700517	-0.00840212	-0.0120167	-0.000123323	0.003524	0.00223464	0.00837008	0	0	0	0
0	0	0	0	0	0	0	0	0	0	0	0	0	0	0	0	0	0	0	0	0	0	0.110369	0.0781431	0.0477473	0.0257465	-0.0134183	-0.0373264	-0.0707067	-0.0958556	-0.107761	-0.0967557	-0.12236	-0.0954321	-0.0932975	-0.049805	-0.0247148	-0.02107	-0.0118454	0.00480155	0.0245139	0.0149333	-0.0128111	4.22075e-05	-0.00116621	0	0	0	0	0
0	0	0	0	0	0	0	0	0	0	0	0	0	0	0	0	0	0	0	0	0	0	0.109949	0.0799094	0.0590717	0.0409089	0.0169067	-0.000703532	-0.0228658	-0.0649759	-0.0465783	-0.0670874	-0.0841905	-0.057796	-0.0387878	-0.0303021	-0.0133723	-0.00800339	0.000438904	0.00835328	0.0177678	0.0263555	-0.00432516	0.0019055	-0.00302756	0	0	0	0	0
0	0	0	0	0	0	0	0	0	0	0	0	0	0	0	0	0	0	0	0	0	0	0.105111	0.0789309	0.0580885	0.0448613	0.0261357	0.0109422	3.68716e-06	-0.0312708	-0.0179492	-0.0279645	-0.0410162	-0.025498	-0.027005	-0.0251577	-0.00940769	-0.00208137	0.00572992	0.0138595	0.0275209	0.0332721	0.00580185	0.00590067	0	0	0	0	0	0
0	0	0	0	0	0	0	0	0	0	0	0	0	0	0	0	0	0	0	0	0	0	0.107789	0.0748049	0.0597726	0.0451827	0.0316395	0.0238349	-0.00225682	-0.0122288	-0.00378638	-0.00446471	-0.0321014	-0.0190745	-0.0155261	-0.0103866	0.00426658	0.00125176	0.0065093	0.0232575	0.0278439	0.0384006	0.000980884	-0.00107969	0	0	0	0	0	0
0	0	0	0	0	0	0	0	0	0	0	0	0	0	0	0	0	0	0	0	0	0	0.103774	0.0702076	0.0545624	0.0437903	0.0265175	0.0247085	0.00731809	-0.0141499	-0.00551374	-0.00427084	-0.0209924	-0.00497631	-0.0147524	-0.0126867	-0.000883891	0.00498489	0.00290788	0.0136447	0.0305592	0.0358831	-0.00258222	0	0	0	0	0	0	0
0	0	0	0	0	0	0	0	0	0	0	0	0	0	0	0	0	0	0	0	0	0	0	0	0.0575065	0.0544557	0.0344023	0.0311622	0.0109684	-0.0167359	-0.00667528	-0.00655982	-0.0420615	-0.0387794	-0.0455687	-0.052446	-0.0300699	-0.00759183	0.0113092	0.0189055	0.0246418	0	0	0	0	0	0	0	0	0
0	0	0	0	0	0	0	0	0	0	0	0	0	0	0	0	0	0	0	0	0	0	0	0	0	0	0	0	0.028479	0.00694026	0.00668644	0.000897788	-0.0162421	0.00314533	0.00705398	0.0232561	0.0378818	0	0	0	0	0	0	0	0	0	0	0	0	0
0	0	0	0	0	0	0	0	0	0	0	0	0	0	0	0	0	0	0	0	0	0	0	0	0	0	0	0	0	0	0	0	0	0	0	0	0	0	0	0	0	0	0	0	0	0	0	0	0	0
0	0	0	0	0	0	0	0	0	0	0	0	0	0	0	0	0	0	0	0	0	0	0	0	0	0	0	0	0	0	0	0	0	0	0	0	0	0	0	0	0	0	0	0	0	0	0	0	0	0
0	0	0	0	0	0	0	0	0	0	0	0	0	0	0	0	0	0	0	0	0	0	0	0	0	0	0	0	0	0	0	0	0	0	0	0	0	0	0	0	0	0	0	0	0	0	0	0	0	0
0	0	0	0	0	0	0	0	0	0	0	0	0	0	0	0	0	0	0	0	0	0	0	0	0	0	0	0	0	0	0	0	0	0	0	0	0	0	0	0	0	0	0	0	0	0	0	0	0	0
0	0	0	0	0	0	0	0	0	0	0	0	0	0	0	0	0	0	0	0	0	0	0	0	0	0	0	0	0	0	0	0	0	0	0	0	0	0	0	0	0	0	0	0	0	0	0	0	0	0
0	0	0	0	0	0	0	0	0	0	0	0	0	0	0	0	0	0	0	0	0	0	0	0	0	0	0	0	0	0	0	0	0	0	0	0	0	0	0	0	0	0	0	0	0	0	0	0	0	0
0	0	0	0	0	0	0	0	0	0	0	0	0	0	0	0	0	0	0	0	0	0	0	0	0	0	0	0	0	0	0	0	0	0	0	0	0	0	0	0	0	0	0	0	0	0	0	0	0	0
0	0	0	0	0	0	0	0	0	0	0	0	0	0	0	0	0	0	0	0	0	0	0	0	0	0	0	0	0	0	0	0	0	0	0	0	0	0	0	0	0	0	0	0	0	0	0	0	0	0
0	0	0	0	0	0	0	0	0	0	0	0	0	0	0	0	0	0	0	0	0	0	0	0	0	0	0	0	0	0	0	0	0	0	0	0	0	0	0	0	0	0	0	0	0	0	0	0	0	0
0	0	0	0	0	0	0	0	0	0	0	0	0	0	0	0	0	0	0	0	0	0	0	0	0	0	0	0	0	0	0	0	0	0	0	0	0	0	0	0	0	0	0	0	0	0	0	0	0	0
0	0	0	0	0	0	0	0	0	0	0	0	0	0	0	0	0	0	0	0	0	0	0	0	0	0	0	0	0	0	0	0	0	0	0	0	0	0	0	0	0	0	0	0	0	0	0	0	0	0
0	0	0	0	0	0	0	0	0	0	0	0	0	0	0	0	0	0	0	0	0	0	0	0	0	0	0	0	0	0	0	0	0	0	0	0	0	0	0	0	0	0	0	0	0	0	0	0	0	0
0	0	0	0	0	0	0	0	0	0	0	0	0	0	0	0	0	0	0	0	0	0	0	0	0	0	0	0	0	0	0	0	0	0	0	0	0	0	0	0	0	0	0	0	0	0	0	0	0	0
0	0	0	0	0	0	0	0	0	0	0	0	0	0	0	0	0	0	0	0	0	0	0	0	0	0	0	0	0	0	0	0	0	0	0	0	0	0	0	0	0	0	0	0	0	0	0	0	0	0
0	0	0	0	0	0	0	0	0	0	0	0	0	0	0	0	0	0	0	0	0	0	0	0	0	0	0	0	0	0	0	0	0	0	0	0	0	0	0	0	0	0	0	0	0	0	0	0	0	0
0	0	0	0	0	0	0	0	0	0	0	0	0	0	0	0	0	0	0	0	0	0	0	0	0	0	0	0	0	0	0	0	0	0	0	0	0	0	0	0	0	0	0	0	0	0	0	0	0	0
0	0	0	0	0	0	0	0	0	0	0	0	0	0	0	0	0	0	0	0	0	0	0	0	0	0	0	0	0	0	0	0	0	0	0	0	0	0	0	0	0	0	0	0	0	0	0	0	0	0
0	0	0	0	0	0	0	0	0	0	0	0	0	0	0	0	0	0	0	0	0	0	0	0	0	0	0	0	0	0	0	0	0	0	0	0	0	0	0	0	0	0	0	0	0	0	0	0	0	0
0	0	0	0	0	0	0	0	0	0	0	0	0	0	0	0	0	0	0	0	0	0	0	0	0	0	0	0	0	0	0	0	0	0	0	0	0	0	0	0	0	0	0	0	0	0	0	0	0	0
0	0	0	0	0	0	0	0	0	0	0	0	0	0	0	0	0	0	0	0	0	0	0	0	0	0	0	0	0	0	0	0	0	0	0	0	0	0	0	0	0	0	0	0	0	0	0	0	0	0
0	0	0	0	0	0	0	0	0	0	0	0	0	0	0	0	0	0	0	0	0	0	0	0	0	0	0	0	0	0	0	0	0	0	0	0	0	0	0	0	0	0	0	0	0	0	0	0	0	0
0	0	0	0	0	0	0	0	0	0	0	0	0	0	0	0	0	0	0	0	0	0	0	0	0	0	0	0	0	0	0	0	0	0	0	0	0	0	0	0	0	0	0	0	0	0	0	0	0	0
0	0	0	0	0	0	0	0	0	0	0	0	0	0	0	0	0	0	0	0	0	0	0	0	0	0	0	0	0	0	0	0	0	0	0	0	0	0	0	0	0	0	0	0	0	0	0	0	0	0
0	0	0	0	0	0	0	0	0	0	0	0	0	0	0	0	0	0	0	0	0	0	0	0	0	0	0	0	0	0	0	0	0	0	0	0	0	0	0	0	0	0	0	0	0	0	0	0	0	0
0	0	0	0	0	0	0	0	0	0	0	0	0	0	0	0	0	0	0	0	0	0	0	0	0	0	0	0	0	0	0	0	0	0	0	0	0	0	0	0	0	0	0	0	0	0	0	0	0	0
0	0	0	0	0	0	0	0	0	0	0	0	0	0	0	0	0	0	0	0	0	0	0	0	0	0	0	0	0	0	0	0	0	0	0	0	0	0	0	0	0	0	0	0	0	0	0	0	0	0
0	0	0	0	0	0	0	0	0	0	0	0	0	0	0	0	0	0	0	0	0	0	0	0	0	0	0	0	0	0	0	0	0	0	0	0	0	0	0	0	0	0	0	0	0	0	0	0	0	0
0	0	0	0	0	0	0	0	0	0	0	0	0	0	0	0	0	0	0	0	0	0	0	0	0	0	0	0	0	0	0	0	0	0	0	0	0	0	0	0	0	0	0	0	0	0	0	0	0	0
0	0	0	0	0	0	0	0	0	0	0	0	0	0	0	0	0	0	0	0	0	0	0	0	0	0	0	0	0	0	0	0	0	0	0	0	0	0	0	0	0	0	0	0	0	0	0	0	0	0
0	0	0	0	0	0	0	0	0	0	0	0	0	0	0	0	0	0	0.188236	0.133957	0.0946271	0.062249	0.0488715	0.02856	0.0157727	0.00619286	0	0	0	0	0	0	0	0	0	0	0	0	0	0	0	0	0	0	0	0	0	0	0	0
0	0	0	0	0	0	0	0	0	0	0	0	0	0	0	0	0	0.197975	0.134606	0.0929956	0.0632026	0.0358624	0.024836	0.0014759	-0.0366223	-0.0457946	-0.0516977	-0.0400212	0	0	0	0	0	0	0	0	0	0	0	0	0	0	0	0	0	0	0	0	0	0
0	0	0	0	0	0	0	0	0	0	0	0	0	0	0	0	0.206414	0.145003	0.098081	0.0710062	0.0419873	0.0255916	-0.0106134	-0.0559376	-0.115658	-0.144339	-0.150802	-0.195661	-0.177915	-0.156758	-0.106835	0	0	0	0	0	0	0	0	0	0	0	0	0	0	0	0	0	0	0
0	0	0	0	0	0	0	0	0	0	0	0	0	0	0	0.297221	0.0136604	-0.0034043	0.0344608	0.0435507	0.0367372	0.0412686	0.0536448	0.0443107	0.0373966	0.0358986	0.0170907	-0.0232355	-0.121996	-0.264934	-0.304597	-0.190416	-0.0322552	0	0	0	0	0	0	0	0	0	0	0	0	0	0	0	0	0
0	0	0	0	0	0	0	0	0	0	0	0	0	0	0.0514037	0.0181961	0.0210933	0.016931	-0.000393166	-0.0296751	-0.0468277	-0.0532674	-0.0537522	-0.061548	-0.072178	-0.0714609	-0.0624709	-0.0592288	-0.0607071	-0.0720242	-0.0377127	-0.0227002	-0.0333819	-0.00936284	0.0134113	0	0	0	0	0	0	0	0	0	0	0	0	0	0	0
0	0	0	0	0	0	0	0	0	0	0	0	0	0.118593	0.0366857	0.0109238	0.00812783	-0.0209886	-0.0222873	-0.0217794	-0.0548001	-0.0708582	-0.0704359	-0.0712529	-0.0773944	-0.075791	-0.0757059	-0.0564678	-0.0602526	-0.0610024	-0.029348	-0.00706639	-0.00652041	0.0212504	0.0347369	0.053345	0.0774462	0.0888054	0.0978532	0.117938	0.120825	0.0728229	0	0	0	0	0	0	0	0
0	0	0	0	0	0	0	0	0	0	0	0	0	0.107836	0.0287697	0.00441116	0.00633455	-0.0186729	-0.0450091	-0.043632	-0.0340938	-0.0564843	-0.0661428	-0.0710119	-0.0776627	-0.0730877	-0.065695	-0.0364529	-0.0293815	-0.0303057	-0.00274832	0.0102964	0.00432471	0.0323189	0.049771	0.0613723	0.0948153	0.108313	0.13338	0.147571	0.164311	0.140067	0.085355	0	0	0	0	0	0	0
0	0	0	0	0	0	0	0	0	0	0	0	0	0.0777241	0.0155889	-0.00186676	-0.00176782	-0.0294161	-0.0531784	-0.0634719	-0.0695462	-0.0496769	-0.0610428	-0.0666328	-0.0643236	-0.05936	-0.0433722	-0.0349157	-0.0306317	-0.041073	-0.0213213	-0.0177311	-0.0270496	0.0150535	0.0385973	0.0665376	0.103704	0.12629	0.141745	0.159326	0.164638	0.156854	0.124733	0	0	0	0	0	0	0
0	0	0	0	0	0	0	0	0	0	0	0	0	0.0730305	0.00971936	-0.00834963	-0.00330201	-0.0292668	-0.0583111	-0.0644721	-0.0729962	-0.0752862	-0.0598755	-0.0577876	-0.0700039	-0.0641115	-0.0493012	-0.0412537	-0.0414574	-0.065143	-0.0362445	-0.0330809	-0.0429519	0.0164679	0.030815	0.0676997	0.109701	0.132104	0.151555	0.173941	0.159771	0.125988	0.0886407	0.0583313	0	0	0	0	0	0
0	0	0	0	0	0	0	0	0	0	0	0	0	0.0738158	0.0167754	0.0035931	0.00917228	-0.0244065	-0.0446106	-0.0643973	-0.069643	-0.0761545	-0.0615354	-0.0497916	-0.0376315	-0.0507754	-0.0519703	-0.039722	-0.0450135	-0.0686061	-0.0471848	-0.0327403	-0.0465948	0.00565919	0.0416466	0.0782754	0.122972	0.145595	0.159992	0.139466	0.0868955	0.0797929	0.0441139	0.0189882	0.0328288	0.0674421	0.0610404	-0.0047294	-0.0175915	0.0200488
0	0	0	0	0	0	0	0	0	0	0	0	0	0.0608405	0.0128249	-0.00435848	0.00404389	-0.0166452	-0.0386015	-0.0478916	-0.0686573	-0.0688494	-0.0452784	-0.0393862	-0.0415276	-0.0275494	-0.0176472	-0.0320927	-0.0281609	-0.0251627	0.00282948	0.00846911	0.00736263	0.0693175	0.11022	0.104142	0.126059	0.117749	0.1132	0.0712361	-0.0170469	0.0283026	0.0275298	-0.00150668	-0.0435405	0	0	0	0	0
0	0	0	0	0	0	0	0	0	0	0	0	0	0.0649156	0.0164819	0.0045895	0.0127475	-0.00127724	-0.0240256	-0.0352248	-0.0378526	-0.0431268	-0.0180719	-0.00860552	-0.0102819	-0.0172156	-0.0177898	0.006936	0.0364377	0.033696	0.0637929	0.0878023	0.105384	0.144673	0.140542	0.122666	0.138891	0.13355	0.0964892	0.04226	-0.022588	0.0287241	0.0276987	-0.0286149	0	0	0	0	0	0
0	0	0	0	0	0	0	0	0	0	0	0	0	0.0871779	0.0262176	0.0173738	0.0242891	0.00903256	-0.00824152	-0.0213073	-0.027981	-0.0392044	-0.0182042	0.018052	0.0100451	-0.00206435	0.0102228	0.0554343	0.0815077	0.0939087	0.117093	0.149042	0.156471	0.142823	0.100683	0.0833751	0.080174	0.0278062	0.0145751	0.0407339	0.0801545	0.0601106	0.00745331	-0.0828106	0	0	0	0	0	0
0	0	0	0	0	0	0	0	0	0	0	0	0	0	0.0452971	0.0316773	0.0336716	0.0210978	-0.000458325	-0.00713238	-0.016102	-0.0180032	-0.00283601	0.0449501	0.0373291	0.0380122	0.0554157	0.10581	0.13509	0.131344	0.159597	0.136279	0.108003	0.111862	0.113376	0.0990732	0.0531626	0.0250982	0.0674439	0.0540296	0.0637688	0.00356484	-0.0950977	-0.121104	0	0	0	0	0	0
0	0	0	0	0	0	0	0	0	0	0	0	0	0	0	0.077757	0.055604	0.039474	0.0193534	0.0116357	0.00444923	0.00130866	-0.00613707	0.0379215	0.0561936	0.0639756	0.0882012	0.143525	0.166644	0.177678	0.216728	0.218868	0.176658	0.154415	0.0882576	0.0749621	0.0762576	0.0876687	0.108085	0.0549042	-0.00482958	-0.0201953	-0.036283	-0.0617543	0	0	0	0	0	0
0	0	0	0	0	0	0	0	0	0	0	0	0	0	0	0	0	0.0498898	0.0325183	0.0179056	0.00752416	-0.00114799	-0.0059369	0.0217491	0.0416475	0.0542818	0.0863189	0.136586	0.158392	0.166061	0.21464	0.229106	0.194296	0.16107	0.129788	0.086802	0.0813361	0.0843569	0.0907969	-0.00966861	-0.00607867	0.0297494	0	0	0	0	0	0	0	0
0	0	0	0	0	0	0	0	0	0	0	0	0	0	0	0	0	0	0	0	0.0542253	0.03073	0.0213572	0.0281567	0.0348676	0.0527849	0.0542828	0.0886744	0.12596	0.126642	0.179052	0.205644	0.188154	0.139513	0.0764764	0.0743469	0.00614285	0.0156385	0	0	0	0	0	0	0	0	0	0	0	0
0	0	0	0	0	0	0	0	0	0	0	0	0	0	0	0	0	0	0	0	0	0	0	0	0	0	0	0	0	0	0	0	0	0	0	0	0	0	0	0	0	0	0	0	0	0	0	0	0	0
0	0	0	0	0	0	0	0	0	0	0	0	0	0	0	0	0	0	0	0	0	0	0	0	0	0	0	0	0	0	0	0	0	0	0	0	0	0	0	0	0	0	0	0	0	0	0	0	0	0
0	0	0	0	0	0	0	0	0	0	0	0	0	0	0	0	0	0	0	0	0	0	0	0	0	0	0	0	0	0	0	0	0	0	0	0	0	0	0	0	0	0	0	0	0	0	0	0	0	0
0	0	0	0	0	0	0	0	0	0	0	0	0	0	0	0	0	0	0	0	0	0	0	0	0	0	0	0	0	0	0	0	0	0	0	0	0	0	0	0	0	0	0	0	0	0	0	0	0	0
0	0	0	0	0	0	0	0	0	0	0	0	0	0	0	0	0	0	0	0	0	0	0	0	0	0	0	0	0	0	0	0	0	0	0	0	0	0	0	0	0	0	0	0	0	0	0	0	0	0
0	0	0	0	0	0	0	0	0	0	0	0	0	0	0	0	0	0	0	0	0	0	0	0	0	0	0	0	0	0	0	0	0	0	0	0	0	0	0	0	0	0	0	0	0	0	0	0	0	0
0	0	0	0	0	0	0	0	0	0	0	0	0	0	0	0	0	0	0	0	0	0	0	0	0	0	0	0	0	0	0	0	0	0	0	0	0	0	0	0	0	0	0	0	0	0	0	0	0	0
0	0	0	0	0	0	0	0	0	0	0	0	0	0	0	0	0	0	0	0	0	0	0	0	0	0	0	0	0	0	0	0	0	0	0	0	0	0	0	0	0	0	0	0	0	0	0	0	0	0
0	0	0	0	0	0	0	0	0	0	0	0	0	0	0	0	0	0	0	0	0	0	0	0	0	0	0	0	0	0	0	0	0	0	0	0	0	0	0	0	0	0	0	0	0	0	0	0	0	0
0	0	0	0	0	0	0	0	0	0	0	0	0	0	0	0	0	0	0	0	0	0	0	0	0	0	0	0	0	0	0	0	0	0	0	0	0	0	0	0	0	0	0	0	0	0	0	0	0	0
0	0	0	0	0	0	0	0	0	0	0	0	0	0	0	0	0	0	0	0	0	0	0	0	0	0	0	0	0	0	0	0	0	0	0	0	0	0	0	0	0	0	0	0	0	0	0	0	0	0
0	0	0	0	0	0	0	0	0	0	0	0	0	0	0	0	0	0	0	0	0	0	0	0	0	0	0	0	0	0	0	0	0	0	0	0	0	0	0	0	0	0	0	0	0	0	0	0	0	0
0	0	0	0	0	0	0	0	0	0	0	0	0	0	0	0	0	0	0	0	0	0	0	0	0	0	0	0	0	0	0	0	0	0	0	0	0	0	0	0	0	0	0	0	0	0	0	0	0	0
0	0	0	0	0	0	0	0	0	0	0	0	0	0	0	0	0	0	0	0	0	0	0	0	0	0	0	0	0	0	0	0	0	0	0	0	0	0	0	0	0	0	0	0	0	0	0	0	0	0
0	0	0	0	0	0	0	0	0	0	0	0	0	0	0	0	0	0	0	0	0	0	0	0	0	0	0	0	0	0	0	0	0	0	0	0	0	0	0	0	0	0	0	0	0	0	0	0	0	0
0	0	0	0	0	0	0	0	0	0	0	0	0	0	0	0	0	0	0	0	0	0	0	0	0	0	0	0	0	0	0	0	0	0	0	0	0	0	0	0	0	0	0	0	0	0	0	0	0	0
0	0	0	0	0	0	0	0	0	0	0	0	0	0	0	0	0	0	0	0	0	0	0	0	0	0	0	0	0	0	0	0	0	0	0	0	0	0	0	0	0	0	0	0	0	0	0	0	0	0
0	0	0	0	0	0	0	0	0	0	0	0	0	0	0	0	0	0	0	0	0	0	0	0	0	0	0	0	0	0	0	0	0	0	0	0	0	0	0	0	0	0	0	0	0	0	0	0	0	0
0	0	0	0	0	0	0	0	0	0	0	0	0	0	0	0	0	0	0	0	0	0	0	0	0	0	0	0	0	0	0	0	0	0	0	0	0	0	0	0	0	0	0	0	0	0	0	0	0	0
0	0	0	0	0	0	0	0	0	0	0	0	0	0	0	0	0	0	0	0	0	0	0	0	0	0	0	0	0	0	0	0	0	0	0	0	0	0	0	0	0	0	0	0	0	0	0	0	0	0
0	0	0	0	0	0	0	0	0	0	0	0	0	0	0	0	0	0	0	0	0	0	0	0	0	0	0	0	0	0	0	0	0	0	0	0	-0.0949454	-0.158859	0	0	0	0	0	0	0	0	0	0	0	0
0	0	0	0	0	0	0	0	0	0	0	0	0	0	0	0	0	0	0	0	0	0	0	0	0	0	0	0	0	0	0	0	0	0	0	-0.088497	-0.129529	-0.20899	-0.239058	-0.255407	0	0	0	0	0	0	0	0	0	0
0	0	0	0	0	0	0	0	0	0	0	0	0	0	0	0	0	0	0	0	0	0	0	0	0	0	0	0	0	0	0	0	0	0	-0.0485266	-0.0815038	-0.0761055	-0.0930095	-0.12393	-0.156568	-0.149891	0	0	0	0	0	0	0	0	0
0	0	0	0	0	0	0	0	0	0	0	0	0	0	0	0	0	0	0	0	0	0	0	0	0	0	0	0	0	0	0	0	0	0.071389	-0.0240168	-0.0585187	-0.068466	-0.0878384	-0.0783926	-0.0720564	-0.0548781	0.0592631	0.0269666	0.0151348	0	0	0	0	0	0
0	0	0	0	0	0	0	0	0	0	0	0	0	0	0	0	0	0	0	0	0	0	0	0	0	0	0	0	0	0	0	0.0844121	0.0341521	0.0367065	-0.0425993	-0.0733142	-0.0657973	-0.0559919	-0.0522378	-0.0253411	0.0146531	0.0271733	0.0195099	-0.000521365	0.045844	0.0620915	0	0	0	0
0	0	0	0	0	0	0	0	0	0	0	0	0	0	0	0	0	0	0	0	0	0	0	0	0	0	0	0	0	0	0.152627	0.166111	0.144788	0.10574	0.0480987	0.0226713	0.0192813	0.0301488	0.0632011	0.0891334	0.0877619	0.0614689	-0.0694719	-0.085212	0.00769428	0.0299267	0.0136258	0	0	0
0	0	0	0	0	0	0	0	0	0	0	0	0	0	0	0	0	0	0	0	0	0	0	0	0	0	0	0	0	0.107645	0.104827	0.155879	0.15823	0.132647	0.108734	0.0878505	0.116327	0.104072	0.120663	0.11258	0.0973296	0.0549905	-0.0337453	-0.0639298	-0.00637121	0.0110076	-0.00116996	0.00218758	0	0
0	0	0	0	0	0	0	0	0	0	0	0	0	0	0	0	0	0	0	0	0	0	0	0	0	0	0	0	0	0.026603	0.0963669	0.120205	0.163326	0.167532	0.120669	0.109529	0.109393	0.105781	0.139219	0.12192	0.0787045	0.0236037	-0.0785201	-0.0765604	-0.0265873	-0.00502734	-0.00702131	-0.00727535	0	0
0	0	0	0	0	0	0	0	0	0	0	0	0	0	0	0	0	0	0	0	0	0	0	0	0	0	0	0	0.0183879	-0.0208576	0.079116	0.150058	0.185002	0.148451	0.15659	0.110136	0.0940954	0.0648409	0.101201	0.0611598	-0.0135242	-0.0640757	-0.116908	-0.0758011	-0.0288057	-0.0122471	-0.0069477	-0.00626783	0	0
0	0	0	0	0	0	0	0	0	0	0	0	0	0	0	0	0	0	0	0	0	0	0	0	0	0	0	0.0540919	0.0111132	-0.00490591	0.0193266	0.0852159	0.088509	0.11115	0.0777974	0.0730447	0.106715	0.0520625	0.0336315	-0.0310801	-0.0818476	-0.0916502	-0.0918188	-0.0566519	-0.0256557	-0.0110002	-0.00967743	-0.00680564	0	0
0	0	0	0	0	0	0	0	0	0	0	0	0	0	0	0	0	0	0	0	0	0	0	0	0	0	0.0929516	0.0512324	0.0202526	-0.0228568	-0.0283034	-0.0283972	-0.00544838	0.0776817	0.0906913	0.0535616	0.0410998	0.00667018	-0.110673	-0.118519	-0.098342	-0.0822493	-0.0771932	-0.0448411	-0.0286082	-0.0210587	-0.0194774	0.00131556	0	0
0	0	0	0	0	0	0	0	0	0	0	0	0	0	0	0	0	0	0	0	0	0	0	0	0	0	0.0783126	0.0456316	0.0127477	-0.0408116	-0.0396793	-0.0502539	-0.0406906	-0.0212042	-0.0329445	-0.0382359	-0.0535298	-0.0777253	-0.0882113	-0.100122	-0.0829633	-0.0622735	-0.0658568	-0.0537041	-0.0216366	-0.00951347	-0.00688535	0.00557834	0	0
0	0	0	0	0	0	0	0	0	0	0	0	0	0	0	0	0	0	0	0	0	0	0	0	0	0.103583	0.0540877	0.050748	0.0340365	-0.0177932	-0.0184596	-0.0230514	-0.0513822	-0.0491518	-0.0546476	-0.0614919	-0.086656	-0.0889023	-0.0760142	-0.0635172	-0.0546829	-0.0559406	-0.0494074	-0.0351198	-0.00623979	0.00502477	-0.00333913	0.01456	0	0
0	0	0	0	0	0	0	0	0	0	0	0	0	0	0	0	0	0	0	0	0	0	0	0	0	0.0808021	0.0149832	0.0137054	0.0137449	-0.0243136	-0.0193139	-0.02303	-0.0527194	-0.0526611	-0.075733	-0.101599	-0.0795797	-0.0779682	-0.0614998	-0.0474745	-0.0406847	-0.0360394	-0.0270112	-0.0247314	-0.00452742	0.00272824	0.00103942	0.0182476	0	0
0	0	0	0	0	0	0	0	0	0	0	0	0	0	0	0	0	0	0	0	0	0	0	0	0	0.0625912	0.0119286	0.00533158	0.00575792	-0.0264212	-0.0241386	-0.0286249	-0.0668746	-0.0699429	-0.0847999	-0.116041	-0.0803048	-0.0692815	-0.0565016	-0.0400451	-0.0298621	-0.0251881	-0.0245955	-0.00876127	0.00834452	0.00623913	0.000118109	0.022983	0	0
0	0	0	0	0	0	0	0	0	0	0	0	0	0	0	0	0	0	0	0	0	0	0	0	0	0.0492513	0.0124683	0.00953613	0.00677064	-0.0217113	-0.023498	-0.0290707	-0.0607819	-0.0597889	-0.0564129	-0.0679192	-0.0396125	-0.0330732	-0.0413811	-0.0408716	-0.0312689	-0.034215	-0.0226876	-0.00865351	0.000786511	0.0218838	0.0251496	0.0319736	0	0
0	0	0	0	0	0	0	0	0	0	0	0	0	0	0	0	0	0	0	0	0	0	0	0	0.0774226	0.0476576	0.0343774	0.0255395	0.0119326	-0.0154784	-0.0161619	-0.0241236	-0.0438319	-0.0222052	-0.0244063	-0.0293708	-0.0211185	-0.0327521	-0.0299575	-0.0324439	-0.0413814	-0.0414917	-0.0264311	-0.011836	0.0087118	0.0192716	0.0229137	0.0389131	0	0
0	0	0	0	0	0	0	0	0	0	0	0	0	0	0	0	0	0	0	0	0	0	0	0	0.0605989	0.0440631	0.0316321	0.0370414	0.0171615	-0.0125853	-0.000738916	-0.0100662	-0.0353173	-0.0163082	-0.0168831	-0.0209497	-0.00771238	-0.0186588	-0.0260344	-0.0245878	-0.0489288	-0.0292387	-0.019851	-0.012217	-0.00182055	0.00692388	0.0269506	0	0	0
0	0	0	0	0	0	0	0	0	0	0	0	0	0	0	0	0	0	0	0	0	0	0	0	0.0878614	0.0594039	0.051955	0.0579104	0.0469853	0.0193919	0.0175968	0.0132803	-0.0137952	0.00599515	-0.00271758	-0.001918	0.00832549	0.00256297	0.00364289	0.0105724	-0.00969203	-0.024504	0.00159896	0.00596185	0.00561916	0.0244236	0.0283819	0	0	0
0	0	0	0	0	0	0	0	0	0	0	0	0	0	0	0	0	0	0	0	0	0	0	0	0	0.0621973	0.048887	0.0590507	0.0482214	0.0191118	0.0249713	0.0177165	-0.0101622	0.0146274	0.00940146	0.00385252	0.0152852	0.0192835	0.0188949	0.0222823	0.0066512	-0.0230437	-0.00263878	0.0107764	0.0129307	0.0240576	0	0	0	0
0	0	0	0	0	0	0	0	0	0	0	0	0	0	0	0	0	0	0	0	0	0	0	0	0	0.0922034	0.0726205	0.0723172	0.0692525	0.0472334	0.0515347	0.0415564	0.0122276	0.0401285	0.0359976	0.0300978	0.0460988	0.044879	0.0443326	0.0477879	0.0419776	-0.00145984	0.0146262	0.0274015	0.0248716	0.0246616	0	0	0	0
0	0	0	0	0	0	0	0	0	0	0	0	0	0	0	0	0	0	0	0	0	0	0	0	0	0	0	0.0900205	0.0851289	0.0633966	0.0675006	0.0640497	0.038166	0.0615084	0.0525726	0.0547378	0.0624869	0.0589646	0.0334033	0.0323702	0.0497012	0.0182846	0.0237478	0.0293181	0.0313856	0	0	0	0	0
0	0	0	0	0	0	0	0	0	0	0	0	0	0	0	0	0	0	0	0	0	0	0	0	0	0	0	0	0	0.0865461	0.101761	0.0916128	0.0451168	0.0561253	0.033855	0.0035216	0.0355385	0.0648185	0.0930934	0.103693	0.0927235	0.0497875	0	0	0	0	0	0	0	0
0	0	0	0	0	0	0	0	0	0	0	0	0	0	0	0	0	0	0	0	0	0	0	0	0	0	0	0	0	0	0	0.130824	0.105427	0.12425	0.126622	0.128159	0.135769	0.127801	0.110618	0	0	0	0	0	0	0	0	0	0	0
0	0	0	0	0	0	0	0	0	0	0	0	0	0	0	0	0	0	0	0	0	0	0	0	0	0	0	0	0	0	0	0	0	0	0	0	0	0	0	0	0	0	0	0	0	0	0	0	0	0
0	0	0	0	0	0	0	0	0	0	0	0	0	0	0	0	0	0	0	0	0	0	0	0	0	0	0	0	0	0	0	0	0	0	0	0	0	0	0	0	0	0	0	0	0	0	0	0	0	0
0	0	0	0	0	0	0	0	0	0	0	0	0	0	0	0	0	0	0	0	0	0	0	0	0	0	0	0	0	0	0	0	0	0	0	0	0	0	0	0	0	0	0	0	0	0	0	0	0	0
0	0	0	0	0	0	0	0	0	0	0	0	0	0	0	0	0	0	0	0	0	0	0	0	0	0	0	0	0	0	0	0	0	0	0	0	0	0	0	0	0	0	0	0	0	0	0	0	0	0
0	0	0	0	0	0	0	0	0	0	0	0	0	0	0	0	0	0	0	0	0	0	0	0	0	0	0	0	0	0	0	0	0	0	0	0	0	0	0	0	0	0	0	0	0	0	0	0	0	0
0	0	0	0	0	0	0	0	0	0	0	0	0	0	0	0	0	0	0	0	0	0	0	0	0	0	0	0	0	0	0	0	0	0	0	0	0	0	0	0	0	0	0	0	0	0	0	0	0	0
0	0	0	0	0	0	0	0	0	0	0	0	0	0	0	0	0	0	0	0	0	0	0	0	0	0	0	0	0	0	0	0	0	0	0	0	0	0	0	0	0	0	0	0	0	0	0	0	0	0
0	0	0	0	0	0	0	0	0	0	0	0	0	0	0	0	0	0	0	0	0	0	0	0	0	0	0	0	0	0	0	0	0	0	0	0	0	0	0	0	0	0	0	0	0	0	0	0	0	0
0	0	0	0	0	0	0	0	0	0	0	0	0	0	0	0	0	0	0	0	0	0	0	0	0	0	0	0	0	0	0	0	0	0	0	0	0	0	0	0	0	0	0	0	0	0	0	0	0	0
0	0	0	0	0	0	0	0	0	0	0	0	0	0	0	0	0	0	0	0	0	0	0	0	0	0	0	0	0	0	0	0	0	0	0	0	0	0	0	0	0	0	0	0	0	0	0	0	0	0
0	0	0	0	0	0	0	0	0	0	0	0	0	0	0	0	0	0	0	0	0	0	0	0	0	0	0	0	0	0	0	0	0	0	0	0	0	0	0	0	0	0	0	0	0	0	0	0	0	0
0	0	0	0	0	0	0	0	0	0	0	0	0	0	0	0	0	0	0	0	0	0	0	0	0	0	0	0	0	0	0	0	0	0	0	0	0	0	0	0	0	0	0	0	0	0	0	0	0	0
0	0	0	0	0	0	0	0	0	0	0	0	0	0	0	0	0	0	0	0	0	0	0	0	0	0	0	0	0	0	0	0	0	0	0	0	0	0	0	0	0	0	0	0	0	0	0	0	0	0
0	0	0	0	0	0	0	0	0	0	0	0	0	0	0	0	0	0	0	0	0	0	0	0	0	0	0	0	0	0	0	0	0	0	0	0	0	0	0	0	0	0	0	0	0	0	0	0	0	0
0	0	0	0	0	0	0	0	0	0	0	0	0	0	0	0	0	0	0	0	0	0	0	0	0	0	0	0	0	0	0	0	0	0	0	0	0	0	0	0	0	0	0	0	0	0	0	0	0	0
0	0	0	0	0	0	0	0	0	0	0	0	0	0	0	0	0	0	0	0	0	0	0	0	0	0	0	0	0	0	0	0	0	0	0	0	0	0	0	0	0	0	0	0	0	0	0	0	0	0
0	0	0	0	0	0	0	0	0	0	0	0	0	0	0	0	0	0	0	0	0	0	0	0	0	0	0	0	0	0	0	0	0	0	0	0	0	0	0	0	0	0	0	0	0	0	0	0	0	0
0	0	0	0	0	0	0	0	0	0	0	0	0	0	0	0	0	0	0	0	0	0	0	0	0	0	0	0	0	0	0	0	0	0	0	0	0	0	0	0	0	0	0	0	0	0	0	0	0	0
0	0	0	0	0	0	0	0	0	0	0	0	0	0	0	0	0	0	0	0	0	0	0	0	0	0	0	0	0	0	0	0	0	0	0	0	0	0	0	0	0	0	0	0	0	0	0	0	0	0
0	0	0	0	0	0	0	0	0	0	0	0	0	0	0	0	0	0	0	0	0	0	0	0	0	0	0	0	0	0	0	0	0	0	0	0	0	0	0	0	0	0	0	0	0	0	0	0	0	0
0	0	0	0	0	0	0	0	0	0	0	0	0	0	0	0	0	0	0	0	0	0	0	0	0	0	0	0	0	0	0	0	0	0	0	0	0	0	0	0	0	0	0	0	0	0	0	0	0	0
0	0	0	0	0	0	0	0	0	0	0	0	0	0	0	0	0	0	0	0	0	0	0	0	0	0	0	0	0	0	0	0	0	0	0	0	0	0	0	0	0	0	0	0	0	0	0	0	0	0
0	0	0	0	0	0	0	0	0	0	0	0	0	0	0	0	0	0	0	0	0	0	0	0	0	0	0	0.0913685	0.0574812	0.044488	0.0513192	0.0323961	-0.00413228	-0.0226422	0	0	0	0	0	0	0	0	0	0	0	0	0	0	0	0
0	0	0	0	0	0	0	0	0	0	0	0	0	0	0	0	0	0	0	0	0	0	0	0.261419	0.48839	0.421889	0.103845	-0.0723138	-0.0941879	0.00186507	0.00277513	-0.0185335	-0.0473179	-0.0168303	-0.0501272	0.0208268	0.264837	0	0	0	0	0	0	0	0	0	0	0	0	0
0	0	0	0	0	0	0	0	0	0	0	0	0	0	0	0	0	0	0	0	0	-0.023392	-0.0253968	0.00746101	0.0173753	0.0253747	0.0188023	0.0098485	-0.0155544	-0.0699786	-0.0327118	0.0391926	0.029433	-0.0402207	-0.128138	-0.18733	-0.230466	-0.217486	0.00107091	0	0	0	0	0	0	0	0	0	0	0
0	0	0	0	0	0	0	0	0	0	0	0	0	0	0	0	0	0.0486302	0.0130876	0.0019163	-0.0138884	-0.0208944	-0.00107189	0.0082122	0.0130763	0.0229264	-0.00587667	-0.0139973	-0.0163972	-0.06591	-0.0474817	-0.019929	-0.0216875	-0.078069	-0.13637	-0.170818	-0.206017	-0.24248	0	0	0	0	0	0	0	0	0	0	0	0
0	0	0	0	0	0	0	0	0	0	0	0	0	0	0	0	0	0.0276403	0.00781214	-0.01187	-0.0207752	-0.00172421	0.0075291	0.0168238	0.0287905	0.0159464	-0.016679	-0.00848148	-0.020336	-0.122391	-0.150512	-0.104005	-0.0211969	-0.140517	-0.106196	-0.13219	-0.187535	-0.176875	0	0	0	0	0	0	0	0	0	0	0	0
0	0	0	0	0	0	0	0	0	0	0	0	0	0	0	0	0.0581003	0.0317866	0.0137489	0.00958422	0.00386974	-0.00262742	0.0151429	0.0411205	0.037319	0.00323324	-0.0176097	0.00331747	-0.0851775	-0.132468	-0.101982	-0.0584652	0.0544697	-0.0651151	-0.100139	-0.0167512	-0.0700903	-0.122162	0	0	0	0	0	0	0	0	0	0	0	0
0	0	0	0	0	0	0	0	0	0	0	0	0	0	0	0	0.081816	0.0698703	0.0521976	0.042747	0.0238919	-0.00128216	0.0099877	0.0526513	0.02968	-0.00261544	-0.00461526	-0.0607273	-0.0864309	-0.0847986	-0.1192	-0.0154151	0.00120526	-0.0676893	0.00566588	-0.0146982	-0.0501191	-0.0325576	0	0	0	0	0	0	0	0	0	0	0	0
0	0	0	0	0	0	0	0	0	0	0	0	0	0	0	0	0.119436	0.118734	0.104635	0.0779364	0.0386948	0.0067797	0.0465046	0.0661124	0.0392545	0.00588652	-0.0260225	-0.064518	-0.0530898	-0.105822	-0.149107	0.00419835	-0.0462838	-0.0646194	0.0250974	0.0319945	-0.0611006	0.0358663	0	0	0	0	0	0	0	0	0	0	0	0
0	0	0	0	0	0	0	0	0	0	0	0	0	0	0	0	0.216306	0.209726	0.188456	0.13384	0.0718963	0.0502579	0.0930858	0.0804006	0.0759246	0.0438182	0.0231113	-0.00481955	-0.0866601	-0.112948	-0.0306209	0.0279019	-0.0744377	-0.0550087	0.0340094	0.0360599	0.0129538	0.0968967	0	0	0	0	0	0	0	0	0	0	0	0
0	0	0	0	0	0	0	0	0	0	0	0	0	0	0	0.215328	0.256927	0.243712	0.203134	0.153047	0.0883115	0.0823226	0.116282	0.079433	0.0851399	0.0328522	0.0378606	0.00617376	-0.0723513	-0.0519846	0.00542786	0.0438376	-0.0698486	-0.0376528	0.0622777	0.0183965	0.067316	0	0	0	0	0	0	0	0	0	0	0	0	0
0	0	0	0	0	0	0	0	0	0	0	0	0	0	0	0.262262	0.293189	0.271325	0.211211	0.152895	0.0987864	0.127153	0.116372	0.0801041	0.0695495	0.0447497	0.0471713	0.04303	0.00197513	0.0100407	0.0246087	0.00764236	-0.0718365	0.00307151	0.0566115	0.0616736	0	0	0	0	0	0	0	0	0	0	0	0	0	0
0	0	0	0	0	0	0	0	0	0	0	0	0	0	0	0	0.286861	0.259488	0.210285	0.139042	0.0979124	0.124351	0.0982569	0.0437915	0.0670112	0.0619973	0.0234159	0.0547864	0.0453808	0.0427369	0.0197616	-0.101954	-0.087075	0.0246133	0.0706409	0	0	0	0	0	0	0	0	0	0	0	0	0	0	0
0	0	0	0	0	0	0	0	0	0	0	0	0	0	0	0	0	0.229949	0.204651	0.232341	0.201544	0.175998	0.134848	0.102561	0.0794274	0.0682141	0.0723356	0.0491131	0.0645248	0.0614707	0.0404853	0.0313116	0.0364586	0.049253	0	0	0	0	0	0	0	0	0	0	0	0	0	0	0	0
0	0	0	0	0	0	0	0	0	0	0	0	0	0	0	0	0	0	0.257803	0.258328	0.255715	0.215783	0.15425	0.082736	0.0211813	0.0232167	0.0337785	0.0552955	0.0795433	0.0580539	0.045016	0.0512801	0.0480003	0	0	0	0	0	0	0	0	0	0	0	0	0	0	0	0	0
0	0	0	0	0	0	0	0	0	0	0	0	0	0	0	0	0	0	0	0.251589	0.251913	0.222644	0.171161	0.0947399	0.00940389	-0.00740182	0.0245316	0.0693735	0.0754503	0.0591168	0.0360982	0.0486714	0	0	0	0	0	0	0	0	0	0	0	0	0	0	0	0	0	0
0	0	0	0	0	0	0	0	0	0	0	0	0	0	0	0	0	0	0	0	0.230676	0.220118	0.185517	0.144306	0.0953748	0.0617185	0.0593883	0.0756413	0.0839116	0.0454463	0.0409168	0	0	0	0	0	0	0	0	0	0	0	0	0	0	0	0	0	0	0
0	0	0	0	0	0	0	0	0	0	0	0	0	0	0	0	0	0	0	0	0	0	0	0.158742	0.124126	0.101915	0.086573	0.0870636	0.0683295	0	0	0	0	0	0	0	0	0	0	0	0	0	0	0	0	0	0	0	0	0
0	0	0	0	0	0	0	0	0	0	0	0	0	0	0	0	0	0	0	0	0	0	0	0	0	0	0	0	0	0	0	0	0	0	0	0	0	0	0	0	0	0	0	0	0	0	0	0	0	0
0	0	0	0	0	0	0	0	0	0	0	0	0	0	0	0	0	0	0	0	0	0	0	0	0	0	0	0	0	0	0	0	0	0	0	0	0	0	0	0	0	0	0	0	0	0	0	0	0	0
0	0	0	0	0	0	0	0	0	0	0	0	0	0	0	0	0	0	0	0	0	0	0	0	0	0	0	0	0	0	0	0	0	0	0	0	0	0	0	0	0	0	0	0	0	0	0	0	0	0
0	0	0	0	0	0	0	0	0	0	0	0	0	0	0	0	0	0	0	0	0	0	0	0	0	0	0	0	0	0	0	0	0	0	0	0	0	0	0	0	0	0	0	0	0	0	0	0	0	0
0	0	0	0	0	0	0	0	0	0	0	0	0	0	0	0	0	0	0	0	0	0	0	0	0	0	0	0	0	0	0	0	0	0	0	0	0	0	0	0	0	0	0	0	0	0	0	0	0	0
0	0	0	0	0	0	0	0	0	0	0	0	0	0	0	0	0	0	0	0	0	0	0	0	0	0	0	0	0	0	0	0	0	0	0	0	0	0	0	0	0	0	0	0	0	0	0	0	0	0
0	0	0	0	0	0	0	0	0	0	0	0	0	0	0	0	0	0	0	0	0	0	0	0	0	0	0	0	0	0	0	0	0	0	0	0	0	0	0	0	0	0	0	0	0	0	0	0	0	0
0	0	0	0	0	0	0	0	0	0	0	0	0	0	0	0	0	0	0	0	0	0	0	0	0	0	0	0	0	0	0	0	0	0	0	0	0	0	0	0	0	0	0	0	0	0	0	0	0	0
0	0	0	0	0	0	0	0	0	0	0	0	0	0	0	0	0	0	0	0	0	0	0	0	0	0	0	0	0	0	0	0	0	0	0	0	0	0	0	0	0	0	0	0	0	0	0	0	0	0
0	0	0	0	0	0	0	0	0	0	0	0	0	0	0	0	0	0	0	0	0	0	0	0	0	0	0	0	0	0	0	0	0	0	0	0	0	0	0	0	0	0	0	0	0	0	0	0	0	0
0	0	0	0	0	0	0	0	0	0	0	0	0	0	0	0	0	0	0	0	0	0	0	0	0	0	0	0	0	0	0	0	0	0	0	0	0	0	0	0	0	0	0	0	0	0	0	0	0	0
0	0	0	0	0	0	0	0	0	0	0	0	0	0	0	0	0	0	0	0	0	0	0	0	0	0	0	0	0	0	0	0	0	0	0	0	0	0	0	0	0	0	0	0	0	0	0	0	0	0
0	0	0	0	0	0	0	0	0	0	0	0	0	0	0	0	0	0	0	0	0	0	0	0	0	0	0	0	0	0	0	0	0	0	0	0	0	0	0	0	0	0	0	0	0	0	0	0	0	0
0	0	0	0	0	0	0	0	0	0	0	0	0	0	0	0	0	0	0	0	0	0	0	0	0	0	0	0	0	0	0	0	0	0	0	0	0	0	0	0	0	0	0	0	0	0	0	0	0	0
0	0	0	0	0	0	0	0	0	0	0	0	0	0	0	0	0	0	0	0	0	0	0	0	0	0	0	0	0	0	0	0	0	0	0	0	0	0	0	0	0	0	0	0	0	0	0	0	0	0
0	0	0	0	0	0	0	0	0	0	0	0	0	0	0	0	0	0	0	0	0	0	0	0	0	0	0	0	0	0	0	0	0	0	0	0	0	0	0	0	0	0	0	0	0	0	0	0	0	0
0	0	0	0	0	0	0	0	0	0	0	0	0	0	0	0	0	0	0	0	0	0	0	0	0	0	0	0	0	0	0	0	0	0	0	0	0	0	0	0	0	0	0	0	0	0	0	0	0	0
0	0	0	0	0	0	0	0	0	0	0	0	0	0	0	0	0	0	0	0	0	0	0	0	0	0	0	0	0	0	0	0	0	0	0	0	0	0	0	0	0	0	0	0	0	0	0	0	0	0
0	0	0	0	0	0	0	0	0	0	0	0	0	0	0	0	0	0	0	0	0	0	0	0	0	0	0	0	0	0	0	0	0	0	0	0	0	0	0	0	0	0	0	0	0	0	0	0	0	0
0	0	0	0	0	0	0	0	0	0	0	0	0	0	0	0	0	0	0	0	0	0	0	0	0	0	0	0	0	0	0	0	0	0	0	0	0	0	0	0	0	0	0	0	0	0	0	0	0	0
0	0	0	0	0	0	0	0	0	0	0	0	0	0	0	0	0	0	0	0	0	0	0	0	0	0	0	0	0	0	0	0	0	0	0	0	0	0	0	0	0	0	0	0	0	0	0	0	0	0
0	0	0	0	0	0	0	0	0	0	0	0	0	0	0	0	0	0	0	0	0	0	0	0	0	0	0	0	0	0	0	0	0	0	0	0	0	0	0	0	0	0	0	0	0	0	0	0	0	0
0	0	0	0	0	0	0	0	0	0	0	0	0	0	0	0	0	0	0	0	0	0	0	0	0	0	0	0	0	0	0	0	0	0	0	0	0	0	0	0	0	0	0	0	0	0	0	0	0	0
0	0	0	0	0	0	0	0	0	0	0	0	0	0	0	0	0	0	0	0	0	0	0	0	0	0	0	0	0	0	0	0	0	0	0	0	0	0	0	0	0	0	0	0	0	0	0	0	0	0
0	0	0	0	0	0	0	0	0	0	0	0	0	0	0	0	0	0	0	0	0	0	0	0	0	0	0	0	0	0	0	0	0	0	0	0	0	0	0	0	0	0	0	0	0	0	0	0	0	0
0	0	0	0	0	0	0	0	0	0	0	0	0	0	0	0	0	0	0	0	0	0	0	0	0	0	0	0	0	0	0	0	0	0	0	0	0	0	0	0	0	0	0	0	0	0	0	0	0	0
0	0	0	0	0	0	0	0	0	0	0	0	0	0	0	0	0	0	0	0	0	0	0	0	0	0	0	0	0	0	0	0	0	0	0	0	0	0	0	0	0	0	0	0	0	0	0	0	0	0
0	0	0	0	0	0	0	0	0	0	0	0	0	0	0	0	0	0	0	0	0	0	0	0	0	0	0	0	0	0	0	0	0	0	0	0	0	0	0	0	0	0	0	0	0	0	0	0	0	0
0	0	0	0	0	0	0	0	0	0	0	0	0	0	0	0	0	0	0	0	0	0	0	0	0	0	0	0	0	0	0	0	0	0	0	0	0	0	0	0	0	0	0	0	0	0	0	0	0	0
0	0	0	0	0	0	0	0	0	0	0	0	0	0	0	0	0	0	0	0	0	0	0	0	0	0	0	0	0	0	0	0	0	0	0	0	0	0	0	0	0	0	0	0	0	0	0	0	0	0
0	0	0	0	0	0	0	0	0	0	0	0	0	0	0	0	0	0	0	0	0	0	0	0	0	0	0	0	0	0	0	0	0	0	0	0	0	0	0	0	0	0	0	0	0	0	0	0	0	0
0	0	0	0	0	0	0	0	0	0	0	0	0	0	0	0	0	0	0	0	0	0	0	0	0	0	0	0	0	0	0	0	0	0	0	0	0	0	0	0	0	0	0	0	0	0	0	0	0	0
0	0	0	0	0	0	0	0	0	0	0	0	0	0	0	0	0	0	0	0	0	0	0	0	0	0	0	-0.0955962	-0.121988	-0.0229352	0.0988326	0	0	0	0	0	0	0	0	0	0	0	0	0	0	0	0	0	0	0
0	0	0	0	0	0	0	0	0	0	0	0	0	0	0	0	0	0	0	0	0	0	0	0	-0.081271	-0.0993242	-0.0807069	-0.0794077	-0.109887	-0.0572487	0.0101059	0	0	0	0	0	0	0	0	0	0	0	0	0	0	0	0	0	0	0
0	0	0	0	0	0	0	0	0	0	0	0	0	0	0	0	0	0	0	0.0268316	-0.0467674	-0.0812475	-0.101625	-0.0927678	-0.0974919	-0.106714	-0.112856	-0.0819562	-0.104924	-0.0678818	-0.00998876	0	0	0	0	0	0	0	0	0	0	0	0	0	0	0	0	0	0	0
0	0	0	0	0	0	0	0	0	0	0	0	0	0	0	0	0	0.0871234	0.0111517	-0.0440111	-0.075778	-0.0913946	-0.0903833	-0.11707	-0.144875	-0.0762226	-0.0648838	-0.0541756	-0.0659709	-0.095584	-0.00722208	0	0	0	0	0	0	0	0	0	0	0	0	0	0	0	0	0	0	0
0	0	0	0	0	0	0	0	0	0	0	0	0	0	0	0	0.119779	-0.0134693	-0.0402938	-0.0482385	-0.0264893	-0.0350073	-0.0508016	-0.100167	-0.161654	-0.160581	-0.0889423	-0.0307539	-0.0569935	-0.0782002	-0.001978	0.00310486	0	0	0	0	0	0	0	0	0	0	0	0	0	0	0	0	0	0
0	0	0	0	0	0	0	0	0	0	0	0	0	0	0	0	0.0657678	-0.00646181	-0.0430741	-0.0576243	-0.0252533	-0.0237289	-0.0487814	-0.0934215	-0.147994	-0.146649	-0.100184	-0.0191804	-0.0596599	-0.0607036	0.0183649	0.0354555	0	0	0	0	0	0	0	0	0	0	0	0	0	0	0	0	0	0
0	0	0	0	0	0	0	0	0	0	0	0	0	0	0	0.0970036	0.0119942	-0.0150244	-0.032142	-0.0277821	-0.0199591	-0.0263872	-0.0416278	-0.0783815	-0.103294	-0.0878941	-0.0816332	-0.0110944	-0.0589071	-0.0206109	0.0509026	0.0531589	0	0	0	0	0	0	0	0	0	0	0	0	0	0	0	0	0	0
0	0	0	0	0	0	0	0	0	0	0	0	0	0	0	0.0248462	-0.0219008	-0.0446322	-0.0577063	-0.040198	-0.0248135	-0.0363782	-0.0256548	-0.0720434	-0.0723552	-0.0443845	-0.0466245	0.00193504	-0.0676888	-0.019147	0.0529646	0.0534479	0	0	0	0	0	0	0	0	0	0	0	0	0	0	0	0	0	0
0	0	0	0	0	0	0	0	0	0	0	0	0	0	0.065898	-0.0407047	-0.0299661	-0.0397562	-0.0682305	-0.0680605	-0.0923102	-0.0833172	-0.0385903	-0.0464592	-0.0705246	-0.0185448	-0.0636126	-0.0608732	-0.0695507	-0.00599302	0.0788521	0.0867751	0	0	0	0	0	0	0	0	0	0	0	0	0	0	0	0	0	0
0	0	0	0	0	0	0	0	0	0	0	0	0	0.356062	0.0883171	-0.0331549	0.0785668	0.140825	0.0488114	-0.0701679	-0.103334	-0.000712684	-0.0310591	-0.0210823	-0.0432327	-0.0190834	0.0434005	-0.116641	-0.130802	-0.0344929	0.0749163	0.0813643	0	0	0	0	0	0	0	0	0	0	0	0	0	0	0	0	0	0
0	0	0	0	0	0	0	0	0	0	0	0	0.0485268	0.0470176	-0.152501	-0.134196	-0.0767256	-0.158017	-0.223374	-0.204347	-0.191508	-0.120594	-0.0769769	-0.00634346	-0.0142074	0.0163698	-0.23202	-0.162334	-0.0714391	-0.0249656	0.0120718	0.0316626	0	0	0	0	0	0	0	0	0	0	0	0	0	0	0	0	0	0
0	0	0	0	0	0	0	0	0	0	0	0.0479145	0.023145	0.00653088	-0.0887567	-0.125093	-0.127382	-0.185019	-0.256781	-0.250158	-0.159406	-0.0951031	-0.037334	-0.00788435	0.002369	-0.0887198	-0.112043	-0.0957172	-0.0796884	-0.036437	-0.00188851	0.0177017	0	0	0	0	0	0	0	0	0	0	0	0	0	0	0	0	0	0
0	0	0	0	0	0	0	0	0	0	0	0.0453479	0.0223368	0.00249666	-0.0665197	-0.124488	-0.111021	-0.137772	-0.197981	-0.213438	-0.137531	-0.0695345	-0.0248445	0.00191698	-0.00869223	-0.121382	-0.133931	-0.100654	-0.0752631	-0.0430074	-0.00377694	0.0139634	0	0	0	0	0	0	0	0	0	0	0	0	0	0	0	0	0	0
0	0	0	0	0	0	0	0	0	0	0	0.0353992	0.0115967	-0.00147018	-0.0620379	-0.145189	-0.11273	-0.137832	-0.159805	-0.146869	-0.107498	-0.0502208	-0.0251906	0.0100916	-0.0543607	-0.137595	-0.15174	-0.114124	-0.0853385	-0.0473335	-0.00373361	0.0132982	0	0	0	0	0	0	0	0	0	0	0	0	0	0	0	0	0	0
0	0	0	0	0	0	0	0	0	0	0	0.0380575	0.0283298	0.0310317	-0.076245	-0.157101	-0.154659	-0.107853	-0.167136	-0.13099	-0.0660995	-0.0297853	-0.0135112	0.000381577	-0.096599	-0.107857	-0.118618	-0.0950771	-0.0630474	-0.0419846	-0.00244946	0.0141096	0	0	0	0	0	0	0	0	0	0	0	0	0	0	0	0	0	0
0	0	0	0	0	0	0	0	0	0	0	0.065243	0.0757272	0.076827	-0.115465	-0.187463	-0.215313	-0.176827	-0.118521	-0.049343	-0.0163976	0.00488669	-0.0038141	-0.0611628	-0.0860785	-0.0801245	-0.0588287	-0.0503099	-0.0365069	-0.0406694	0.00526732	0.0193231	0	0	0	0	0	0	0	0	0	0	0	0	0	0	0	0	0	0
0	0	0	0	0	0	0	0	0	0	0	0.208029	0.159614	0.103422	-0.0817355	-0.311406	-0.480607	-0.559227	-0.400771	-0.238209	-0.14756	-0.0699421	-0.0560822	-0.0414332	-0.0515325	-0.0454179	-0.0483066	-0.0439519	-0.0611707	-0.0692034	-0.0539582	-0.0256984	0	0	0	0	0	0	0	0	0	0	0	0	0	0	0	0	0	0
0	0	0	0	0	0	0	0	0	0	0	0.208858	0.209391	0.189369	0.116798	0.0593313	0.0403035	0.014006	0.00103374	0.0143761	0.026416	0.0470734	0.0506681	0.0219545	0.0248097	0.0285056	0.0210044	0.0189454	0.0142463	-0.00263126	0.00184033	0	0	0	0	0	0	0	0	0	0	0	0	0	0	0	0	0	0	0
0	0	0	0	0	0	0	0	0	0	0	0	0.229098	0.195978	0.135148	0.0874094	0.0896672	0.0710055	0.0573531	0.0567231	0.0620708	0.0654515	0.0743435	0.0296338	0.0355957	0.0393775	0.0307949	0.021968	0.0102571	-0.00700837	0	0	0	0	0	0	0	0	0	0	0	0	0	0	0	0	0	0	0	0
0	0	0	0	0	0	0	0	0	0	0	0	0.244915	0.197971	0.146468	0.114602	0.154828	0.16411	0.137392	0.133897	0.115916	0.109766	0.101828	0.0560351	0.0593101	0.049228	0.0347532	0.0239661	0.0102009	-0.00397353	0	0	0	0	0	0	0	0	0	0	0	0	0	0	0	0	0	0	0	0
0	0	0	0	0	0	0	0	0	0	0	0	0.247508	0.185581	0.139253	0.140808	0.188056	0.221331	0.218759	0.205646	0.157103	0.137542	0.142502	0.0853375	0.0768011	0.0613503	0.0411668	0.0259206	0.0104812	0	0	0	0	0	0	0	0	0	0	0	0	0	0	0	0	0	0	0	0	0
0	0	0	0	0	0	0	0	0	0	0	0	0	0	0.170382	0.200021	0.224741	0.243337	0.26095	0.248819	0.186917	0.180159	0.175639	0.111089	0.0918406	0.0639554	0.038449	0	0	0	0	0	0	0	0	0	0	0	0	0	0	0	0	0	0	0	0	0	0	0
0	0	0	0	0	0	0	0	0	0	0	0	0	0	0	0	0	0.238483	0.235922	0.223743	0.214951	0.192654	0.167613	0.107611	0	0	0	0	0	0	0	0	0	0	0	0	0	0	0	0	0	0	0	0	0	0	0	0	0	0
0	0	0	0	0	0	0	0	0	0	0	0	0	0	0	0	0	0	0	0	0	0	0	0	0	0	0	0	0	0	0	0	0	0	0	0	0	0	0	0	0	0	0	0	0	0	0	0	0	0
0	0	0	0	0	0	0	0	0	0	0	0	0	0	0	0	0	0	0	0	0	0	0	0	0	0	0	0	0	0	0	0	0	0	0	0	0	0	0	0	0	0	0	0	0	0	0	0	0	0
0	0	0	0	0	0	0	0	0	0	0	0	0	0	0	0	0	0	0	0	0	0	0	0	0	0	0	0	0	0	0	0	0	0	0	0	0	0	0	0	0	0	0	0	0	0	0	0	0	0
0	0	0	0	0	0	0	0	0	0	0	0	0	0	0	0	0	0	0	0	0	0	0	0	0	0	0	0	0	0	0	0	0	0	0	0	0	0	0	0	0	0	0	0	0	0	0	0	0	0
0	0	0	0	0	0	0	0	0	0	0	0	0	0	0	0	0	0	0	0	0	0	0	0	0	0	0	0	0	0	0	0	0	0	0	0	0	0	0	0	0	0	0	0	0	0	0	0	0	0
0	0	0	0	0	0	0	0	0	0	0	0	0	0	0	0	0	0	0	0	0	0	0	0	0	0	0	0	0	0	0	0	0	0	0	0	0	0	0	0	0	0	0	0	0	0	0	0	0	0
0	0	0	0	0	0	0	0	0	0	0	0	0	0	0	0	0	0	0	0	0	0	0	0	0	0	0	0	0	0	0	0	0	0	0	0	0	0	0	0	0	0	0	0	0	0	0	0	0	0
0	0	0	0	0	0	0	0	0	0	0	0	0	0	0	0	0	0	0	0	0	0	0	0	0	0	0	0	0	0	0	0	0	0	0	0	0	0	0	0	0	0	0	0	0	0	0	0	0	0
0	0	0	0	0	0	0	0	0	0	0	0	0	0	0	0	0	0	0	0	0	0	0	0	0	0	0	0	0	0	0	0	0	0	0	0	0	0	0	0	0	0	0	0	0	0	0	0	0	0
0	0	0	0	0	0	0	0	0	0	0	0	0	0	0	0	0	0	0	0	0	0	0	0	0	0	0	0	0	0	0	0	0	0	0	0	0	0	0	0	0	0	0	0	0	0	0	0	0	0
0	0	0	0	0	0	0	0	0	0	0	0	0	0	0	0	0	0	0	0	0	0	0	0	0	0	0	0	0	0	0	0	0	0	0	0	0	0	0	0	0	0	0	0	0	0	0	0	0	0
0	0	0	0	0	0	0	0	0	0	0	0	0	0	0	0	0	0	0	0	0	0	0	0	0	0	0	0	0	0	0	0	0	0	0	0	0	0	0	0	0	0	0	0	0	0	0	0	0	0
0	0	0	0	0	0	0	0	0	0	0	0	0	0	0	0	0	0	0	0	0	0	0	0	0	0	0	0	0	0	0	0	0	0	0	0	0	0	0	0	0	0	0	0	0	0	0	0	0	0
0	0	0	0	0	0	0	0	0	0	0	0	0	0	0	0	0	0	0	0	0	0	0	0	0	0	0	0	0	0	0	0	0	0	0	0	0	0	0	0	0	0	0	0	0	0	0	0	0	0
0	0	0	0	0	0	0	0	0	0	0	0	0	0	0	0	0	0	0	0	0	0	0	0	0	0	0	0	0	0	0	0	0	0	0	0	0	0	0	0	0	0	0	0	0	0	0	0	0	0
0	0	0	0	0	0	0	0	0	0	0	0	0	0	0	0	0	0	0	0	0	0	0	0	0	0	0	0	0	0	0	0	0	0	0	0	0	0	0	0	0	0	0	0	0	0	0	0	0	0
0	0	0	0	0	0	0	0	0	0	0	0	0	0	0	0	0	0	0	0	0	0	0	0	0	0	0	0	0	0	0	0	0	0	0	0	0	0	0	0	0	0	0	0	0	0	0	0	0	0
0	0	0	0	0	0	0	0	0	0	0	0	0	0	0	0	0	0	0	0	0	0	0	0	0	0	0	0	0	0	0	0	0	0	0	0	0	0	0	0	0	0	0	0	0	0	0	0	0	0
0	0	0	0	0	0	0	0	0	0	0	0	0	0	0	0	0	0	0	0	0	0	0	0	0	0	0	0	0	0	0	0	0	0	0	0	0	0	0	0	0	0	0	0	0	0	0	0	0	0
0	0	0	0	0	0	0	0	0	0	0	0	0	0	0	0	0	0	0	0	0	0	0	0	0	0	0	0	0	0	0	0	0	0	0	0	0	0	0	0	0	0	0	0	0	0	0	0	0	0
0	0	0	0	0	0	0	0	0	0	0	0	0	0	0	0	0	0	0	0	0	0	0	0	0	0	0	0	0	0	0	0	0	0	0	0	0	0	0	0	0	0	0	0	0	0	0	0	0	0
0	0	0	0	0	0	0	0	0	0	0	0	0	0	0	0	0	0	0	0	0	0	0	0	0	0	0	0	0	0	0	0	0	0	0	0	0	0	0	0	0	0	0	0	0	0	0	0	0	0
0	0	0	0	0	0	0	0	0	0	0	0	0	0	0	0	0	0	0	0	0	0	0	0	0	0	0	0	0	0	0	0	0	0	0	0	0	0	0	0	0	0	0	0	0	0	0	0	0	0
0	0	0	0	0	0	0	0	0	0	0	0	0	0	0	0	0	0	0	0	0	0	0	0	0	0	0	0	0	0	0	0	0	0	0	0	0	0	0	0	0	0	0	0	0	0	0	0	0	0
0	0	0	0	0	0	0	0	0	0	0	0	0	0	0	0	0	0	0	0	0	0	0	0	0	0	0	0	0	0	0	0	0	0	0	0	0	0	0	0	0	0	0	0	0	0	0	0	0	0
0	0	0	0	0	0	0	0	0	0	0	0	0	0	0	0	0	0	0	0	0	0	0	0	0	0	0	0	0	0	0	0	0	0	0	0	0	0	0	0	0	0	0	0	0	0	0	0	0	0
0	0	0	0	0	0	0	0	0	0	0	0	0	0	0	0	0	0	0	0	0	0	0	0	0	0	0	0	0	0	0	0	0	0	0	0	0	0	0	0	0	0	0	0	0	0	0	0	0	0
0	0	0	0	0	0	0	0	0	0	0	0	0	0	0	0	0	0	0	0	0	0	0	0	0	0	0	0	0	0	0	0	0	0	0	0	0	0	0	0	0	0	0	0	0	0	0	0	0	0
0	0	0	0	0	0	0	0	0	0	0	0	0	0	0	0	0	0	0	0	0	0	0	0	0	0	0	0	0	0	0	0	0	0	0	0	0	0	0	0	0	0	0	0	0	0	0	0	0	0
0	0	0	0	0	0	0	0	0	0	0	0	0	0	0	0	0	0	0.163255	0.0198816	-0.066325	-0.0674257	-0.0469646	0	0	0	0	0	0	0	0	0	0	0	0	0	0	0	0	0	0	0	0	0	0	0	0	0	0	0
0	0	0	0	0	0	0	0	0	0	0	0	0	0	0	0	0	0	0.0738463	0.0380583	-0.0107699	-0.0486993	-0.0390984	0	0	0	0	0	0	0	0	0	0	0	0	0	0	0	0	0	0	0	0	0	0	0	0	0	0	0
0	0	0	0	0	0	0	0	0	0	0	0	0	0	0	0	0	0.0318383	0.0390545	0.0409309	-0.0103926	-0.0369322	-0.0535134	0	0	0	0	0	0	0	0	0	0	0	0	0	0	0	0	0	0	0	0	0	0	0	0	0	0	0
0	0	0	0	0	0	0	0	0	0	0	0	0	0	0	0	0.0609132	0.0470189	0.0248239	0.0259329	0.00190783	-0.0424756	-0.0563844	-0.0793255	0	0	0	0	0	0	0	0	0	0	0	0	0	0	0	0	0	0	0	0	0	0	0	0	0	0
0	0	0	0	0	0	0	0	0	0	0	0	0	0	0	0	-0.0272648	0.0514664	0.014761	0.0296296	0.0128044	-0.0362163	-0.0528136	-0.0556225	-0.0765746	0	0	0	0	0	0	0	0	0	0	0	0	0	0	0	0	0	0	0	0	0	0	0	0	0
0	0	0	0	0	0	0	0	0	0	0	0	0	0	0	-0.0309821	0.027495	0.0484996	-0.0117863	0.0595262	0.0891564	0.0516342	-0.0172427	-0.0641596	-0.0517568	-0.0699027	0	0	0	0	0	0	0	0	0	0	0	0	0	0	0	0	0	0	0	0	0	0	0	0
0	0	0	0	0	0	0	0	0	0	0	0	0	0	0.0187701	-0.0814618	0.054635	0.0632618	-0.0139669	0.0358402	0.0965203	0.123902	0.107861	0.0873529	0.0832486	0.0751464	0.0203523	0	0	0	0	0	0	0	0	0	0	0	0	0	0	0	0	0	0	0	0	0	0	0
0	0	0	0	0	0	0	0	0	0	0	0	0	0.083494	-0.0917798	-0.126414	0.0096934	0.075468	0.0725942	0.0830886	0.0914614	0.125762	0.145634	0.161631	0.0954826	0.00495599	0.032887	0	0	0	0	0	0	0	0	0	0	0	0	0	0	0	0	0	0	0	0	0	0	0
0	0	0	0	0	0	0	0	0	0	0	0	0.147499	-0.0135086	-0.0723893	-0.129102	0.000267004	0.0885482	0.121415	0.0889906	0.0789013	0.120027	0.133228	0.135647	0.102179	0.0592363	0.0287426	0.0398005	0	0	0	0	0	0	0	0	0	0	0	0	0	0	0	0	0	0	0	0	0	0
0	0	0	0	0	0	0	0	0	0	0	0	0.0975136	-0.0213205	-0.0657205	-0.113101	0.00105299	0.0922871	0.098595	0.0574793	0.0720799	0.0985842	0.118324	0.117741	0.0827611	0.0713004	0.0420703	0.0370815	0	0	0	0	0	0	0	0	0	0	0	0	0	0	0	0	0	0	0	0	0	0
0	0	0	0	0	0	0	0	0	0	0	0	0.0319636	-0.0291183	-0.0555627	-0.0926196	0.0102987	0.0890833	0.0913825	0.0305177	0.0230784	0.0471872	0.0607535	0.0557443	0.0548922	0.0479037	0.0482122	0.0501781	0	0	0	0	0	0	0	0	0	0	0	0	0	0	0	0	0	0	0	0	0	0
0	0	0	0	0	0	0	0	0	0	0	0	-0.0185965	-0.083283	-0.105042	-0.12512	-0.00792823	0.0709444	0.0492245	-0.0304444	-0.0587319	-0.0591483	-0.0344642	-0.00242102	0.0175394	0.00789404	0.0174354	0.0452206	0.0414658	0	0	0	0	0	0	0	0	0	0	0	0	0	0	0	0	0	0	0	0	0
0	0	0	0	0	0	0	0	0	0	0	0.120904	0.0149201	0.0233041	-0.0418953	-0.0303897	0.0160756	0.080455	0.0460804	0.00738836	-0.0292766	-0.0478121	-0.0619885	-0.0322571	-0.00730946	0.028163	0.0419759	0.0658931	0.0558273	0	0	0	0	0	0	0	0	0	0	0	0	0	0	0	0	0	0	0	0	0
0	0	0	0	0	0	0	0	0	0	0	0.0906535	0.0279292	0.0401564	-0.0677081	0.00551528	0.0277018	0.0762413	0.0417521	0.0190978	0.021044	0.0225105	0.0150788	0.0238535	0.0310545	0.0410987	0.0431423	0.0621765	0.0649778	0	0	0	0	0	0	0	0	0	0	0	0	0	0	0	0	0	0	0	0	0
0	0	0	0	0	0	0	0	0	0	0	0	0.0243891	0.0356138	-0.00291716	0.017942	0.0502462	0.0289833	0.0067768	0.00619511	0.000989014	-0.00385116	-0.00158041	0.00758501	0.0182214	0.0377367	0.0403212	0.0648291	0.0610032	0	0	0	0	0	0	0	0	0	0	0	0	0	0	0	0	0	0	0	0	0
0	0	0	0	0	0	0	0	0	0	0	0.100467	0.0500685	0.0571081	0.0306532	0.0474056	0.0400988	0.0199062	0.0113116	0.0117666	0.0150551	0.0254929	0.0281189	0.0334806	0.0421116	0.0542827	0.0671355	0.0821919	0	0	0	0	0	0	0	0	0	0	0	0	0	0	0	0	0	0	0	0	0	0
0	0	0	0	0	0	0	0	0	0	0	0	0.0972563	0.0963633	0.0687703	0.0676523	0.0639195	0.0287187	0.0228727	0.015727	0.00787406	0.0172671	0.0462983	0.0571348	0.0630173	0.0703509	0.0798042	0.0695286	0	0	0	0	0	0	0	0	0	0	0	0	0	0	0	0	0	0	0	0	0	0
0	0	0	0	0	0	0	0	0	0	0	0	0.140203	0.11515	0.0897573	0.0926724	0.101315	0.0639509	0.0280949	-0.0159303	-0.0274428	0.0151869	0.0544226	0.0718237	0.0743082	0.0830097	0.0817631	0	0	0	0	0	0	0	0	0	0	0	0	0	0	0	0	0	0	0	0	0	0	0
0	0	0	0	0	0	0	0	0	0	0	0	0.162647	0.147769	0.126251	0.139209	0.152619	0.121555	0.0855243	0.0606709	0.0542812	0.07266	0.0904484	0.0906992	0.0897909	0.0887834	0	0	0	0	0	0	0	0	0	0	0	0	0	0	0	0	0	0	0	0	0	0	0	0
0	0	0	0	0	0	0	0	0	0	0	0	0.193066	0.177097	0.162123	0.185405	0.202736	0.189535	0.150343	0.119747	0.117278	0.119054	0.109408	0.0961022	0.0877237	0.0565866	0	0	0	0	0	0	0	0	0	0	0	0	0	0	0	0	0	0	0	0	0	0	0	0
0	0	0	0	0	0	0	0	0	0	0	0	0.210008	0.207268	0.201008	0.218834	0.244541	0.222627	0.188676	0.151445	0.128621	0.11888	0.109099	0.0838742	0	0	0	0	0	0	0	0	0	0	0	0	0	0	0	0	0	0	0	0	0	0	0	0	0	0
0	0	0	0	0	0	0	0	0	0	0	0	0	0	0	0	0	0	0	0	0	0	0	0	0	0	0	0	0	0	0	0	0	0	0	0	0	0	0	0	0	0	0	0	0	0	0	0	0	0
0	0	0	0	0	0	0	0	0	0	0	0	0	0	0	0	0	0	0	0	0	0	0	0	0	0	0	0	0	0	0	0	0	0	0	0	0	0	0	0	0	0	0	0	0	0	0	0	0	0
0	0	0	0	0	0	0	0	0	0	0	0	0	0	0	0	0	0	0	0	0	0	0	0	0	0	0	0	0	0	0	0	0	0	0	0	0	0	0	0	0	0	0	0	0	0	0	0	0	0
0	0	0	0	0	0	0	0	0	0	0	0	0	0	0	0	0	0	0	0	0	0	0	0	0	0	0	0	0	0	0	0	0	0	0	0	0	0	0	0	0	0	0	0	0	0	0	0	0	0
0	0	0	0	0	0	0	0	0	0	0	0	0	0	0	0	0	0	0	0	0	0	0	0	0	0	0	0	0	0	0	0	0	0	0	0	0	0	0	0	0	0	0	0	0	0	0	0	0	0
0	0	0	0	0	0	0	0	0	0	0	0	0	0	0	0	0	0	0	0	0	0	0	0	0	0	0	0	0	0	0	0	0	0	0	0	0	0	0	0	0	0	0	0	0	0	0	0	0	0
0	0	0	0	0	0	0	0	0	0	0	0	0	0	0	0	0	0	0	0	0	0	0	0	0	0	0	0	0	0	0	0	0	0	0	0	0	0	0	0	0	0	0	0	0	0	0	0	0	0
0	0	0	0	0	0	0	0	0	0	0	0	0	0	0	0	0	0	0	0	0	0	0	0	0	0	0	0	0	0	0	0	0	0	0	0	0	0	0	0	0	0	0	0	0	0	0	0	0	0
0	0	0	0	0	0	0	0	0	0	0	0	0	0	0	0	0	0	0	0	0	0	0	0	0	0	0	0	0	0	0	0	0	0	0	0	0	0	0	0	0	0	0	0	0	0	0	0	0	0
0	0	0	0	0	0	0	0	0	0	0	0	0	0	0	0	0	0	0	0	0	0	0	0	0	0	0	0	0	0	0	0	0	0	0	0	0	0	0	0	0	0	0	0	0	0	0	0	0	0
0	0	0	0	0	0	0	0	0	0	0	0	0	0	0	0	0	0	0	0	0	0	0	0	0	0	0	0	0	0	0	0	0	0	0	0	0	0	0	0	0	0	0	0	0	0	0	0	0	0
0	0	0	0	0	0	0	0	0	0	0	0	0	0	0	0	0	0	0	0	0	0	0	0	0	0	0	0	0	0	0	0	0	0	0	0	0	0	0	0	0	0	0	0	0	0	0	0	0	0
0	0	0	0	0	0	0	0	0	0	0	0	0	0	0	0	0	0	0	0	0	0	0	0	0	0	0	0	0	0	0	0	0	0	0	0	0	0	0	0	0	0	0	0	0	0	0	0	0	0
0	0	0	0	0	0	0	0	0	0	0	0	0	0	0	0	0	0	0	0	0	0	0	0	0	0	0	0	0	0	0	0	0	0	0	0	0	0	0	0	0	0	0	0	0	0	0	0	0	0
0	0	0	0	0	0	0	0	0	0	0	0	0	0	0	0	0	0	0	0	0	0	0	0	0	0	0	0	0	0	0	0	0	0	0	0	0	0	0	0	0	0	0	0	0	0	0	0	0	0
0	0	0	0	0	0	0	0	0	0	0	0	0	0	0	0	0	0	0	0	0	0	0	0	0	0	0	0	0	0	0	0	0	0	0	0	0	0	0	0	0	0	0	0	0	0	0	0	0	0
0	0	0	0	0	0	0	0	0	0	0	0	0	0	0	0	0	0	0	0	0	0	0	0	0	0	0	0	0	0	0	0	0	0	0	0	0	0	0	0	0	0	0	0	0	0	0	0	0	0
0	0	0	0	0	0	0	0	0	0	0	0	0	0	0	0	0	0	0	0	0	0	0	0	0	0	0	0	0	0	0	0	0	0	0	0	0	0	0	0	0	0	0	0	0	0	0	0	0	0
0	0	0	0	0	0	0	0	0	0	0	0	0	0	0	0	0	0	0	0	0	0	0	0	0	0	0	0	0	0	0	0	0	0	0	0	0	0	0	0	0	0	0	0	0	0	0	0	0	0
0	0	0	0	0	0	0	0	0	0	0	0	0	0	0	0	0	0	0	0	0	0	0	0	0	0	0	0	0	0	0	0	0	0	0	0	0	0	0	0	0	0	0	0	0	0	0	0	0	0
0	0	0	0	0	0	0	0	0	0	0	0	0	0	0	0	0	0	0	0	0	0	0	0	0	0	0	0	0	0	0	0	0	0	0	0	0	0	0	0	0	0	0	0	0	0	0	0	0	0
0	0	0	0	0	0	0	0	0	0	0	0	0	0	0	0	0	0	0	0	0	0	0	0	0	0	0	0	0	0	0	0	0	0	0	0	0	0	0	0	0	0	0	0	0	0	0	0	0	0
0	0	0	0	0	0	0	0	0	0	0	0	0	0	0	0	0	0	0	0	0	0	0	0	0	0	0	0	0	0	0	0	0	0	0	0	0	0	0	0	0	0	0	0	0	0	0	0	0	0
0	0	0	0	0	0	0	0	0	0	0	0	0	0	0	0	0	0	0	0	0	0	0	0	0	0	0	0	0	0	0	0	0	0	0	0	0	0	0	0	0	0	0	0	0	0	0	0	0	0
0	0	0	0	0	0	0	0	0	0	0	0	0	0	0	0	0	0	0	0	0	0	0	0	0	0	0	0	0	0	0	0	0	0	0	0	0	0	0	0	0	0	0	0	0	0	0	0	0	0
0	0	0	0	0	0	0	0	0	0	0	0	0	0	0	0	0	0	0	0	0	0	0	0	0	0	0	0	0	0	0	0	0	0	0	0	0	0	0	0	0	0	0	0	0	0	0	0	0	0
0	0	0	0	0	0	0	0	0	0	0	0	0	0	0	0	0	0	0	0	0	0	0	0	0	0	0	0	0	0	0	0	0	0	0	0	0	0	0	0	0	0	0	0	0	0	0	0	0	0
0	0	0	0	0	0	0	0	0	0	0	0	0	0	0	0	0	0	0	0	0	0	0	0	0	0	0	0	0	0	0	0	0	0	0	0	0	0	0	0	0	0	0	0	0	0	0	0	0	0
0	0	0	0	0	0	0	0	0	0	0	0	0	0	0	0	0	0	0	0	0	0	0	0	0	0	0	0	0	0	0	0	0	0	0	0	0	0	0	0	0	0	0	0	0	0	0	0	0	0
0	0	0	0	0	0	0	0	0	0	0	0	0	0	0	0	0	0	0	0	0	0	0	0	0	0	0	0	0	0	0	0	0	0	0	0	0	0	0	0	0	0	0	0	0	0	0	0	0	0
0	0	0	0	0	0	0	0	0	0	0	0	0	0	0	0	0	0	0	0	0	0	0	0	0	0	0	0	0	0	0	0	0	0	0	0	0	0	0	0	0	0	0	0	0	0	0	0	0	0
0	0	0	0	0	0	0	0	0	0	0	0	0	0	0	0	0	0	0	0	0	0	0	0	0	0	0	0	0	0	0	0	0	0	0	0	0	0	0	0	0	0	0	0	0	0	0	0	0	0
0	0	0	0	0	0	0	0	0	0	0	0	0	0	0	0	0	0	0	0	0	0	0	0	0	0	0	0	0	0	0	0	0	0	0	0	0	0	0	0	0	0	0	0	0	0	0	0	0	0
0	0	0	0	0	0	0	0	0	0	0	0	0	0	0	0	0	0	0	0	0	0	0	0	0	0	0	0	0	0	0	0	0	0	0	0	0	0	0	0	0	0	0	0	0	0	0	0	0	0
0	0	0	0	0	0	0	0	0	0	0	0	0	0	0	0	0	0	0	0	0	0	0	0	0	0	0	0	0	0	0	0	0	0	0	0	0	0	0	0	0	0	0	0	0	0	0	0	0	0
0	0	0	0	0	0	0	0	0	0	0	0	0	0	0	0	0	0	0	0	0	0	0	0	0	0	0	0	0	0	0	0	0	0	0	0	0	0	0	0	0	0	0	0	0	0	0	0	0	0
0	0	0	0	0	0	0	0	0	0	0	0	0	0	0	0	0	0	0	0	0	0	0	0	0	0	0	0	0	0	0	0	0	0	0	0	0	0	0	0	0	0	0	0	0	0	0	0	0	0
0	0	0	0	0	0	0	0	0	0	0	0	0	0	0	0	0	0	0	0	0	0	0	0	0	0	0	0	0	0	0	0	0	0	0	0	0	0	0	0	0	0	0	0	0	0	0	0	0	0
0	0	0	0	0	0	0	0	0	0	0	0	0	0	0	0	0	0	0	0	0	0	0	0	0	0	0	0	0	0	0	0	0	0	0	0	0	0	0	0	0	0	0	0	0	0	0	0	0	0
0	0	0	0	0	0	0	0	0	0	0	0	0	0	0	0	0	0	0	0	0	0	0	0	0	0	0	0	0	0	0	0	0	0	0	0	0	0	0	0	0	0	0	0	0	0	0	0	0	0
0	0	0	0	0	0	0	0	0	0	0	0	0	0	0	0	0	0	0	0	0	0	0	0	0	0	0	0	0	0	0	0	0	0	0	0	0	0	0	0	0	0	0	0	0	0	0	0	0	0
0	0	0	0	0	0	0	0	0	0	0	0	0	0	0	0	0	0	0	0	0	0	0	0	0	0	0	0	0	0	0	0	0	0	0	0	0	0	0	0	0	0	0	0	0	0	0	0	0	0
0	0	0	0	0	0	0	0	0	0	0	0	0	0	0	0	0	0	0	0	0	0	0	0	0	0	0	0	0	0	0	0	0	0	0	0	0	0	0	0	0	0	0	0	0	0	0	0	0	0
0	0	0	0	0	0	0	0	0	0	0	0	0	0	0	0	0	0	0	0	0	0	0	0	0	0	0	0	0	0	0	0	0	0	0	0	0	0	0	0	0	0	0	0	0	0	0	0	0	0
0	0	0	0	0	0	0	0	0	0	0	0	0	0	0	0	0	0	0	0	0	0	0	0	0	0	0	0	0	0	0	0	0	0	0	0	0	0	0	0	0	0	0	0	0	0	0	0	0	0
0	0	0	0	0	0	0	0	0	0	0	0	0	0	0	0	0	0	0	0	0	0	0	0	0	0	0	0	0	0	0	0	0	0	0	0	0	0	0	0	0	0	0	0	0	0	0	0	0	0
0	0	0	0	0	0	0	0	0	0	0	0	0	0	0	0	0	0	0	0	0	0	0	0	0	0	0	0	0	0	0	0	0	0	0	0	0	0	0	0	0	0	0	0	0	0	0	0	0	0
0	0	0	0	0	0	0	0	0	0	0	0	0	0	0	0	0	0	0	0	0	0	0	0	0	0	0	0	0	0	0	0	0	0	0	0	0	0	0	0	0	0	0	0	0	0	0	0	0	0
0	0	0	0	0	0	0	0	0	0	0	0	0	0	0	0	0	0	0	0	0	0	0	0	0	0	0	0	0	0	0	0	0	0	0	0	0	0	0	0	0	0	0	0	0	0	0	0	0	0
0	0	0	0	0	0	0	0	0	0	0	0	0	0	0	0	0	0	0	0	0	0	0	0	0	0	0	0	0	0	0	0	0	0	0	0	0	0	0	0	0	0	0	0	0	0	0	0	0	0
0	0	0	0	0	0	0	0	0	0	0	0	0	0	0	0	0	0	0	0	0	0	0	0	0	0	0	0	0	0	0	0	0	0	0	0	0	0	0	0	0	0	0	0	0	0	0	0	0	0
0	0	0	0	0	0	0	0	0	0	0	0	0	0	0	0	0	0	0	0	0	0	0	0	0	0	0	0	0	0	0	0	0	0	0	0	0	0	0	0	0	0	0	0	0	0	0	0	0	0
0	0	0	0	0	0	0	0	0	0	0	0	0	0	0	0	0	0	0	0	0	0	0	0	0	0	0	0	0	0	0	0	0	0	0	0	0	0	0	0	0	0	0	0	0	0	0	0	0	0
0	0	0	0	0	0	0	0	0	0	0	0	0	0	0	0	0	0	0	0	0	0	0	0	0	0	0	0	0	0	0	0	0	0	0	0	0	0	0	0	0	0	0	0	0	0	0	0	0	0
0	0	0	0	0	0	0	0	0	0	0	0	0	0	0	0	0	0	0	0	0	0	0	0	0	0	0	0	0	0	0	0	0	0	0	0	0	0	0	0	0	0	0	0	0	0	0	0	0	0
0	0	0	0	0	0	0	0	0	0	0	0	0	0	0	0	0	0	0	0	0	0	0	0	0	0	0	0	0	0	0	0	0	0	0	0	0	0	0	0	0	0	0	0	0	0	0	0	0	0
0	0	0	0	0	0	0	0	0	0	0	0	0	0	0	0	0	0	0	0	0	0	0	0	0	0	0	0	0	0	0	0	0	0	0	0	0	0	0	0	0	0	0	0	0	0	0	0	0	0
0	0	0	0	0	0	0	0	0	0	0	0	0	0	0	0	0	0	0	0	0	0	0	0	0	0	0	0	0	0	0	0	0	0	0	0	0	0	0	0	0	0	0	0	0	0	0	0	0	0
0	0	0	0	0	0	0	0	0	0	0	0	0	0	0	0	0	0	0	0	0	0	0	0	0	0	0	0	0	0	0	0	0	0	0	0	0	0	0	0	0	0	0	0	0	0	0	0	0	0
0	0	0	0	0	0	0	0	0	0	0	0	0	0	0	0	0	0	0	0	0	0	0	0	0	0	0	0	0	0	0	0	0	0	0	0	0	0	0	0	0	0	0	0	0	0	0	0	0	0
0	0	0	0	0	0	0	0	0	0	0	0	0	0	0	0	0	0	0	0	0	0	0	0	0	0	0	0	0	0	0	0	0	0	0	0	0	0	0	0	0	0	0	0	0	0	0	0	0	0
0	0	0	0	0	0	0	0	0	0	0	0	0	0	0	0	0	0	0	0	0	0	0	0	0	0	0	0	0	0	0	0	0	0	0	0	0	0	0	0	0	0	0	0	0	0	0	0	0	0
0	0	0	0	0	0	0	0	0	0	0	0	0	0	0	0	0	0	0	0	0	0	0	0	0	0	0	0	0	0	0	0	0	0	0	0	0	0	0	0	0	0	0	0	0	0	0	0	0	0
0	0	0	0	0	0	0	0	0	0	0	0	0	0	0	0	0	0	0	0	0	0	0	0	0	0	0	0	0	0	0	0	0	0	0	0	0	0	0	0	0	0	0	0	0	0	0	0	0	0
0	0	0	0	0	0	0	0	0	0	0	0	0	0	0	0	0	0	0	0	0	0	0	0	0	0	0	0	0	0	0	0	0	0	0	0	0	0	0	0	0	0	0	0	0	0	0	0	0	0
0	0	0	0	0	0	0	0	0	0	0	0	0	0	0	0	0	0	0	0	0	0	0	0	0	0	0	0	0	0	0	0	0	0	0	0	0	0	0	0	0	0	0	0	0	0	0	0	0	0
0	0	0	0	0	0	0	0	0	0	0	0	0	0	0	0	0	0	0	0	0	0	0	0	0	0	0	0	0	0	0	0	0	0	0	0	0	0	0	0	0	0	0	0	0	0	0	0	0	0
[truncated: 2,510 more columns]
