# Supplementary material for: Application of near-infrared hyperspectral imaging to identify a variety of silage maize seeds and common maize seeds
Source: RSC Adv. 2020 Mar 23;10(20):11707–15. doi: 10.1039/c9ra11047j (PMC9050551; doi:10.1039/c9ra11047j)
Supplement: RA-010-C9RA11047J-s011 [file RA-010-C9RA11047J-s011.xlsx]

## Sheet: Sheet1
0	0	0	0	0	0	0	0	0	0	0	0	0	0	0	0	0	0	0	0	0	0	0	0	0	0	0	0	0	0	0	0	0	0	0	0	0	0	0	0	0	0	0	0	0	0	0	0	0	0
0	0	0	0	0	0	0	0	0	0	0	0	0	0	0	0	0	0	0	0	0	0	0	0	0	0	0	0	0	0	0	0	0	0	0	0	0	0	0	0	0	0	0	0	0	0	0	0	0	0
0	0	0	0	0	0	0	0	0	0	0	0	0	0	0	0	0	0	0	0	0	0	0	0	0	0	0	0	0	0	0	0	0	0	0	0	0	0	0	0	0	0	0	0	0	0	0	0	0	0
0	0	0	0	0	0	0	0	0	0	0	0	0	0	0	0	0	0	0	0	0	0	0	0	0	0	0	0	0	0	0	0	0	0	0	0	0	0	0	0	0	0	0	0	0	0	0	0	0	0
0	0	0	0	0	0	0	0	0	0	0	0	0	0	0	0	0	0	0	0	0	0	0	0	0	0	0	0	0	0	0	0	0	0	0	0	0	0	0	0	0	0	0	0	0	0	0	0	0	0
0	0	0	0	0	0	0	0	0	0	0	0	0	0	0	0	0	0	0	0	0	0	0	0	0	0	0	0	0	0	0	0	0	0	0	0	0	0	0	0	0	0	0	0	0	0	0	0	0	0
0	0	0	0	0	0	0	0	0	0	0	0	0	0	0	0	0	0	0	0	0	0	0	0	0	0	0	0	0	0	0	0	0	0	0	0	0	0	0	0	0	0	0	0	0	0	0	0	0	0
0	0	0	0	0	0	0	0	0	0	0	0	0	0	0	0	0	0	0	0	0	0	0	0	0	0	0	0	0	0	0	0	0	0	0	0	0	0	0	0	0	0	0	0	0	0	0	0	0	0
0	0	0	0	0	0	0	0	0	0	0	0	0	0	0	0	0	0	0	0	0	0	0	0	0	0	0	0	0	0	0	0	0	0	0	0	0	0	0	0	0	0	0	0	0	0	0	0	0	0
0	0	0	0	0	0	0	0	0	0	0	0	0	0	0	0	0	0	0	0	0	0	0	0	0	0	0	0	0	0	0	0	0	0	0	0	0	0	0	0	0	0	0	0	0	0	0	0	0	0
0	0	0	0	0	0	0	0	0	0	0	0	0	0	0	0	0	0	0	0	0	0	0	0	0	0	0	0	0	0	0	0	0	0	0	0	0	0	0	0	0	0	0	0	0	0	0	0	0	0
0	0	0	0	0	0	0	0	0	0	0	0	0	0	0	0	0	0	0	0	0	0	0	0	0	0	0	0	0	0	0	0	0	0	0	0	0	0	0	0	0	0	0	0	0	0	0	0	0	0
0	0	0	0	0	0	0	0	0	0	0	0	0	0	0	0	0	0	0	0	0	0	0	0	0	0	0	0	0	0	0	0	0	0	0	0	0	0	0	0	0	0	0	0	0	0	0	0	0	0
0	0	0	0	0	0	0	0	0	0	0	0	0	0	0	0	0	0	0	0	0	0	0	0	0	0	0	0	0	0	0	0	0	0	0	0	0	0	0	0	0	0	0	0	0	0	0	0	0	0
0	0	0	0	0	0	0	0	0	0	0	0	0	0	0	0	0	0	0	0	0	0	0	0	0	0	0	0	0	0	0	0	0	0	0	0	0	0	0	0	0	0	0	0	0	0	0	0	0	0
0	0	0	0	0	0	0	0	0	0	0	0	0	0	0	0	0	0	0	0	0	0	0	0	0	0	0	0	0	0	0	0	0	0	0	0	0	0	0	0	0	0	0	0	0	0	0	0	0	0
0	0	0	0	0	0	0	0	0	0	0	0	0	0	0	0	0	0	0	0	0	0	0	0	0	0	0	0	0	0	0	0	0	0	0	0	0	0	0	0	0	0	0	0	0	0	0	0	0	0
0	0	0	0	0	0	0	0	0	0	0	0	0	0	0	0	0	0	0	0	0	0	0	0	0	0	0	0	0	0	0	0	0	0	0	0	0	0	0	0	0	0	0	0	0	0	0	0	0	0
0	0	0	0	0	0	0	0	0	0	0	0	0	0	0	0	0	0	0	0	0	0	0	0	0	0	0	0	0	0	0	0	0	0	0	0	0	0	0	0	0	0	0	0	0	0	0	0	0	0
0	0	0	0	0	0	0	0	0	0	0	0	0	0	0	0	0	0	0	0	0	0	0	0	0	0	0	0	0	0	0	0	0	0	0	0	0	0	0	0	0	0	0	0	0	0	0	0	0	0
0	0	0	0	0	0	0	0	0	0	0	0	0	0	0	0	0	0	0	0	0	0	0	0	0	0	0	0	0	0	0	0	0	0	0	0	0	0	0	0	0	0	0	0	0	0	0	0	0	0
0	0	0	0	0	0	0	0	0	0	0	0	0	0	0	0	0	0	0	0	0	0	0	0	0	0	0	0	0	0	0	0	0	0	0	0	0	0	0	0	0	0	0	0	0	0	0	0	0	0
0	0	0	0	0	0	0	0	0	0	0	0	0	0	0	0	0	0	0	0	0	0	0	0	0	0	0	0	0	0	0	0	0	0	0	0	0	0	0	0	0	0	0	0	0	0	0	0	0	0
0	0	0	0	0	0	0	0	0	0	0	0	0	0	0	0	0	0	0	0	0	0	0	0	0	0	0	0	0	0	0	0	0	0	0	0	0	0	0	0	0	0	0	0	0	0	0	0	0	0
0	0	0	0	0	0	0	0	0	0	0	0	0	0	0	0	0	0	0	0	0	0	0	0	0	0	0	0	0	0	0	0	0	0	0	0	0	0	0	0	0	0	0	0	0	0	0	0	0	0
0	0	0	0	0	0	0	0	0	0	0	0	0	0	0	0	0	0	0	0	0	0	0	0	0	0	0	0	0	0	0	0	0	0	0	0	0	0	0	0	0	0	0	0	0	0	0	0	0	0
0	0	0	0	0	0	0	0	0	0	0	0	0	0	0	0	0	0	0	0	0	0	0	0	0	0	0	0	0	0	0	0	0	0	0	0	0	0	0	0	0	0	0	0	0	0	0	0	0	0
0	0	0	0	0	0	0	0	0	0	0	0	0	0	0	0	0	0	0	0	0	0	0	0	0	0	0	0	0	0	0	0	0	0	0	0	0	0	0	0	0	0	0	0	0	0	0	0	0	0
0	0	0	0	0	0	0	0	0	0	0	0	0	0	0	0	0	0	0	0	0	0	0	0	0	0	0	0	0	0	0	0	0	0	0	0	0	0	0	0	0	0	0	0	0	0	0	0	0	0
0	0	0	0	0	0	0	0	0	0	0	0	0	0	0	0	0	0	0	0	0	0	0	0	0	0	0	0	0	0	0	0	0	0	0	0	0	0	0	0	0	0	0	0	0	0	0	0	0	0
0	0	0	0	0	0	0	0	0	0	0	0	0	0	0	0	0	0	0	0	0	0	0	0	0	0	0	0	0	0	0	0	0	0	0	0	0	0	0	0	0	0	0	0	0	0	0	0	0	0
0	0	0	0	0	0	0	0	0	0	0	0	0	0	0	0	0	0	0	0	0	0	0	0	0	0	0	0	0	0	0	0	0	0	0	0	0	0	0	0	0	0	0	0	0	0	0	0	0	0
0	0	0	0	0	0	0	0	0	0	0	0	0	0	0	0	0	0	0	0	0	0	0	0	0	0	0	0	0	0	0	0	0	0	0	0	0	0	0	0	0	0	0	0	0	0	0	0	0	0
0	0	0	0	0	0	0	0	0	0	0	0	0	0	0	0	0	0	0	0	0	0	0	0	0	0	0	0	0	0	0	0	0	0	0	0	0	0	0	0	0	0	0	0	0	0	0	0	0	0
0	0	0	0	0	0	0	0	0	0	0	0	0	0	0	0	0	0	0	0	0	0	0	0	0	0	0	0	0	0	0	0	0	0	0	0	0	0	0	0	0	0	0	0	0	0	0	0	0	0
0	0	0	0	0	0	0	0	0	0	0	0	0	0	0	0	0	0	0	0	0	0	0	0	0	0	0	0	0	0	0	0	0	0	0	0	0	0	0	0	0	0	0	0	0	0	0	0	0	0
0	0	0	0	0	0	0	0	0	0	0	0	0	0	0	0	0	0	0	0	0	0	0	0	0	0	0	0	0	0	0	0	0	0	0	0	0	0	0	0	0	0	0	0	0	0	0	0	0	0
0	0	0	0	0	0	0	0	0	0	0	0	0	0	0	0	0	0	0	0	0	0	0	0	0	0	0	0	0	0	0	0	0	0	0	0	0	0	0	0	0	0	0	0	0	0	0	0	0	0
0	0	0	0	0	0	0	0	0	0	0	0	0	0	0	0	0	0	0	0	0	0	0	0	0	0	0	0	0	0	0	0	0	0	0	0	0	0	0	0	0	0	0	0	0	0	0	0	0	0
0	0	0	0	0	0	0	0	0	0	0	0	0	0	0	0	0	0	0	0	0	0	0	0	0	0	0	0	0	0	0	0	0	0	0	0	0	0	0	0	0	0	0	0	0	0	0	0	0	0
0	0	0	0	0	0	0	0	0	0	0	0	0	0	0	0	0	0	0	0	0	0	0	0	0	0	0	0	0	0	0	0	0	0	0	0	0	0	0	0	0	0	0	0	0	0	0	0	0	0
0	0	0	0	0	0	0	0	0	0	0	0	0	0	0	0	0	0	0	0	0	0	0	0	0	0	0	0	0	0	0	0	0	0	0	0	0	0	0	0	0	0	0	0	0	0	0	0	0	0
0	0	0	0	0	0	0	0	0	0	0	0	0	0	0	0	0	0	0	0	0	0	0	0	0	0	0	0	0	0	0	0	0	0	0	0	0	0	0	0	0	0	0	0	0	0	0	0	0	0
0	0	0	0	0	0	0	0	0	0	0	0	0	0	0	0	0	0	0	0	0	0	0	0	0	0	0	0	0	0	0	0	0	0	0	0	0	0	0	0	0	0	0	0	0	0	0	0	0	0
0	0	0	0	0	0	0	0	0	0	0	0	0	0	0	0	0	0	0	0	0	0	0	0	0	0	0	0	0	0	0	0	0	0	0	0	0	0	0	0	0	0	0	0	0	0	0	0	0	0
0	0	0	0	0	0	0	0	0	0	0	0	0	0	0	0	0	0	0	0	0	0	0	0	0	0	0	0	0	0	0	0	0	0	0	0	0	0	0	0	0	0	0	0	0	0	0	0	0	0
0	0	0	0	0	0	0	0	0	0	0	0	0	0	0	0	0	0	0	0	0	0	0	0	0	0	0	0	0	0	0	0	0	0	0	0	0	0	0	0	0	0	0	0	0	0	0	0	0	0
0	0	0	0	0	0	0	0	0	0	0	0	0	0	0	0	0	0	0	0	0	0	0	0	0	0	0	0	0	0	0	0	0	0	0	0	0	0	0	0	0	0	0	0	0	0	0	0	0	0
0	0	0	0	0	0	0	0	0	0	0	0	0	0	0	0	0	0	0	0	0	0	0	0	0	0	0	0	0	0	0	0	0	0	0	0	0	0	0	0	0	0	0	0	0	0	0	0	0	0
0	0	0	0	0	0	0	0	0	0	0	0	0	0	0	0	0	0	0	0	0	0	0	0	0	0	0	0	0	0	0	0	0	0	0	0	0	0	0	0	0	0	0	0	0	0	0	0	0	0
0	0	0	0	0	0	0	0	0	0	0	0	0	0	0	0	0	0	0	0	0	0	0	0	0	0	0	0	0	0	0	0	0	0	0	0	0	0	0	0	0	0	0	0	0	0	0	0	0	0
0	0	0	0	0	0	0	0	0	0	0	0	0	0	0	0	0	0	0	0	0	0	0	0	0	0	0	0	0	0	0	0	0	0	0	0	0	0	0	0	0	0	0	0	0	0	0	0	0	0
0	0	0	0	0	0	0	0	0	0	0	0	0	0	0	0	0	0	0	0	0	0	0	0	0	0	0	0	0	0	0	0	0	0	0	0	0	0	0	0	0	0	0	0	0	0	0	0	0	0
0	0	0	0	0	0	0	0	0	0	0	0	0	0	0	0	0	0	0	0	0	0	0	0	0	0	0	0	0	0	0	0	0	0	0	0	0	0	0	0	0	0	0	0	0	0	0	0	0	0
0	0	0	0	0	0	0	0	0	0	0	0	0	0	0	0	0	0	0	0	0	0	0	0	0	0	0	0	0	0	0	0	0	0	0	0	0	0	0	0	0	0	0	0	0	0	0	0	0	0
0	0	0	0	0	0	0	0	0	0	0	0	0	0	0	0	0	0	0	0	0	0	0	0	0	0	0	0	0	0	0	0	0	0	0	0	0	0	0	0	0	0	0	0	0	0	0	0	0	0
0	0	0	0	0	0	0	0	0	0	0	0	0	0	0	0	0	0	0	0	0	0	0	0	0	0	0	0	0	0	0	0	0	0	0	0	0	0	0	0	0	0	0	0	0	0	0	0	0	0
0	0	0	0	0	0	0	0	0	0	0	0	0	0	0	0	0	0	0	0	0	0	0	0	0	0	0	0	0	0	0	0	0	0	0	0	0	0	0	0	0	0	0	0	0	0	0	0	0	0
0	0	0	0	0	0	0	0	0	0	0	0	0	0	0	0	0	0	0	0	0	0	0	0	0	0	0	0	0	0	0	0	0	0	0	0	0	0	0	0	0	0	0	0	0	0	0	0	0	0
0	0	0	0	0	0	0	0	0	0	0	0	0	0	0	0	0	0	0	0	0	0	0	0	0	0	0	0	0	0	0	0	0	0	0	0	0	0	0	0	0	0	0	0	0	0	0	0	0	0
0	0	0	0	0	0	0	0	0	0	0	0	0	0	0	0	0	0	0	0	0	0	0	0	0	0	0	0	0	0	0	0	0	0	0	0	0	0	0	0	0	0	0	0	0	0	0	0	0	0
0	0	0	0	0	0	0	0	0	0	0	0	0	0	0	0	0	0	0	0	0	0	0	0	0	0	0	0	0	0	0	0	0	0	0	0	0	0	0	0	0	0	0	0	0	0	0	0	0	0
0	0	0	0	0	0	0	0	0	0	0	0	0	0	0	0	0	0	0	0	0	0	0	0	0	0	0	0	0	0	0	0	0	0	0	0	0	0	0	0	0	0	0	0	0	0	0	0	0	0
0	0	0	0	0	0	0	0	0	0	0	0	0	0	0	0	0	0	0	0	0	0	0	0	0	0	0	0	0	0	0	0	0	0	0	0	0	0	0	0	0	0	0	0	0	0	0	0	0	0
0	0	0	0	0	0	0	0	0	0	0	0	0	0	0	0	0	0	0	0	0	0	0	0	0	0	0	0	0	0	0	0	0	0	0	0	0	0	0	0	0	0	0	0	0	0	0	0	0	0
0	0	0	0	0	0	0	0	0	0	0	0	0	0	0	0	0	0	0	0	0	0	0	0	0	0	0	0	0	0	0	0	0	0	0	0	0	0	0	0	0	0	0	0	0	0	0	0	0	0
0	0	0	0	0	0	0	0	0	0	0	0	0	0	0	0	0	0	0	0	0	0	0	0	0	0	0	0	0	0	0	0	0	0	0	0	0	0	0	0	0	0	0	0	0	0	0	0	0	0
0	0	0	0	0	0	0	0	0	0	0	0	0	0	0	0	0	0	0	0	0	0	0	0	0	0	0	0	0	0	0	0	0	0	0	0	0	0	0	0	0	0	0	0	0	0	0	0	0	0
0	0	0	0	0	0	0	0	0	0	0	0	0	0	0	0	0	0	0	0	0	0	0	0	0	0	0	0	0	0	0	0	0	0	0	0	0	0	0	0	0	0	0	0	0	0	0	0	0	0
0	0	0	0	0	0	0	0	0	0	0	0	0	0	0	0	0	0	0	0	0	0	0	0	0	0	0	0	0	0	0	0	0	0	0	0	0	0	0	0	0	0	0	0	0	0	0	0	0	0
0	0	0	0	0	0	0	0	0	0	0	0	0	0	0	0	0	0	0	0	0	0	0	0	0	0	0	0	0	0	0	0	0	0	0	0	0	0	0	0	0	0	0	0	0	0	0	0	0	0
0	0	0	0	0	0	0	0	0	0	0	0	0	0	0	0	0	0	0	0	0	0	0	0	0	0	0	0	0	0	0	0	0	0	0	0	0	0	0	0	0	0	0	0	0	0	0	0	0	0
0	0	0	0	0	0	0	0	0	0	0	0	0	0	0	0	0	0	0	0	0	0	0	0	0	0	0	0	0	0	0	0	0	0	0	0	0	0	0	0	0	0	0	0	0	0	0	0	0	0
0	0	0	0	0	0	0	0	0	0	0	0	0	0	0	0	0	0	0	0	0	0	0	0	0	0	0	0	0	0	0	0	0	0	0	0	0	0	0	0	0	0	0	0	0	0	0	0	0	0
0	0	0	0	0	0	0	0	0	0	0	0	0	0	0	0	0	0	0	0	0	0	0	0	0	0	0	0	0	0	0	0	0	0	0	0	0	0	0	0	0	0	0	0	0	0	0	0	0	0
0	0	0	0	0	0	0	0	0	0	0	0	0	0	0	0	0	0	0	0	0	0	0	0	0	0	0	0	0	0	0	0	0	0	0	0	0	0	0	0	0	0	0	0	0	0	0	0	0	0
0	0	0	0	0	0	0	0	0	0	0	0	0	0	0	0	0	0	0	0	0	0	0	0	0	0	0	0	0	0	0	0	0	0	0	0	0	0	0	0	0	0	0	0	0	0	0	0	0	0
0	0	0	0	0	0	0	0	0	0	0	0	0	0	0	0	0	0	0	0	0	0	0	0	0	0	0	0	0	0	0	0	0	0	0	0	0	0	0	0	0	0	0	0	0	0	0	0	0	0
0	0	0	0	0	0	0	0	0	0	0	0	0	0	0	0	0	0	0	0	0	0	0	0	0	0	0	0	0	0	0	0	0	0	0	0	0	0	0	0	0	0	0	0	0	0	0	0	0	0
0	0	0	0	0	0	0	0	0	0	0	0	0	0	0	0	0	0	0	0	0	0	0	0	0	0	0	0	0	0	0	0	0	0	0	0	0	0	0	0	0	0	0	0	0	0	0	0	0	0
0	0	0	0	0	0	0	0	0	0	0	0	0	0	0	0	0	0	0	0	0	0	0	0	0	0	0	0	0	0	0	0	0	0	0	0	0	0	0	0	0	0	0	0	0	0	0	0	0	0
0	0	0	0	0	0	0	0	0	0	0	0	0	0	0	0	0	0	0	0	0	0	0	0	0	0	0	0	0	0	0	0	0	0	0	0	0	0	0	0	0	0	0	0	0	0	0	0	0	0
0	0	0	0	0	0	0	0	0	0	0	0	0	0	0	0	0	0	0	0	0	0	0	0	0	0	0	0	0	0	0	0	0	0	0	0	0	0	0	0	0	0	0	0	0	0	0	0	0	0
0	0	0	0	0	0	0	0	0	0	0	0	0	0	0	0	0	0	0	0	0	0	0	0	0	0	0	0	0	0	0	0	0	0	0	0	0	0	0	0	0	0	0	0	0	0	0	0	0	0
0	0	0	0	0	0	0	0	0	0	0	0	0	0	0	0	0	0	0	0	0	0	0	0	0	0	0	0	0	0	0	0	0	0	0	0	0	0	0	0	0	0	0	0	0	0	0	0	0	0
0	0	0	0	0	0	0	0	0	0	0	0	0	0	0	0	0	0	0	0	0	0	0	0	0	0	0	0	0	0	0	0	0	0	0	0	0	0	0	0	0	0	0	0	0	0	0	0	0	0
0	0	0	0	0	0	0	0	0	0	0	0	0	0	0	0	0	0	0	0	0	0	0	0	0	0	0	0	0	0	0	0	0	0	0	0	0	0	0	0	0	0	0	0	0	0	0	0	0	0
0	0	0	0	0	0	0	0	0	0	0	0	0	0	0	0	0	0	0	0	0	0	0	0	0	0	0	0	0	0	0	0	0	0	0	0	0	0	0	0	0	0	0	0	0	0	0	0	0	0
0	0	0	0	0	0	0	0	0	0	0	0	0	0	0	0	0	0	0	0	0	0	0	0	0	0	0	0	0	0	0	0	0	0	0	0	0	0	0	0	0	0	0	0	0	0	0	0	0	0
0	0	0	0	0	0	0	0	0	0	0	0	0	0	0	0	0	0	0	0	0	0	0	0	0	0	0	0	0	0	0	0	0	0	0	0	0	0	0	0	0	0	0	0	0	0	0	0	0	0
0	0	0	0	0	0	0	0	0	0	0	0	0	0	0	0	0	0	0	0	0	0	0	0	0	0	0	0	0	0	0	0	0	0	0	0	0	0	0	0	0	0	0	0	0	0	0	0	0	0
0	0	0	0	0	0	0	0	0	0	0	0	0	0	0	0	0	0	0	0	0	0	0	0	0	0	0	0	0	0	0	0	0	0	0	0	0	0	0	0	0	0	0	0	0	0	0	0	0	0
0	0	0	0	0	0	0	0	0	0	0	0	0	0	0	0	0	0	0	0	0	0	0	0	0	0	0	0	0	0	0	0	0	0	0	0	0	0	0	0	0	0	0	0	0	0	0	0	0	0
0	0	0	0	0	0	0	0	0	0	0	0	0	0	0	0	0	0	0	0	0	0	0	0	0	0	0	0	0	0	0	0	0	0	0	0	0	0	0	0	0	0	0	0	0	0	0	0	0	0
0	0	0	0	0	0	0	0	0	0	0	0	0	0	0	0	0	0	0	0	0	0	0	0	0	0	0	0	0	0	0	0	0	0	0	0	0	0	0	0	0	0	0	0	0	0	0	0	0	0
0	0	0	0	0	0	0	0	0	0	0	0	0	0	0	0	0	0	0	0	0	0	0	0	0	0	0	0	0	0	0	0	0	0	0	0	0	0	0	0	0	0	0	0	0	0	0	0	0	0
0	0	0	0	0	0	0	0	0	0	0	0	0	0	0	0	0	0	0	0	0	0	0	0	0	0	0	0	0	0	0	0	0	0	0	0	0	0	0	0	0	0	0	0	0	0	0	0	0	0
0	0	0	0	0	0	0	0	0	0	0	0	0	0	0	0	0	0	0	0	0	0	0	0	0	0	0	0	0	0	0	0	0	0	0	0	0	0	0	0	0	0	0	0	0	0	0	0	0	0
0	0	0	0	0	0	0	0	0	0	0	0	0	0	0	0	0	0	0	0	0	0	0	0	0	0	0	0	0	0	0	0	0	0	0	0	0	0	0	0	0	0	0	0	0	0	0	0	0	0
0	0	0	0	0	0	0	0	0	0	0	0	0	0	0	0	0	0	0	0	0	0	0	0	0	0	0	0	0	0	0	0	0	0	0	0	0	0	0	0	0	0	0	0	0	0	0	0	0	0
0	0	0	0	0	0	0	0	0	0	0	0	0	0	0	0	0	0	0	0	0	0	0	0	0	0	0	0	0	0	0	0	0	0	0	0	0	0	0	0	0	0	0	0	0	0	0	0	0	0
0	0	0	0	0	0	0	0	0	0	0	0	0	0	0	0	0	0	0	0	0	0	0	0	0	0	0	0	0	0	0	0	0	0	0	0	0	0	0	0	0	0	0	0	0	0	0	0	0	0
0	0	0	0	0	0	0	0	0	0	0	0	0	0	0	0	0	0	0	0	0	0	0	0	0	0	0	0	0	0	0	0	0	0	0	0	0	0	0	0	0	0	0	0	0	0	0	0	0	0
0	0	0	0	0	0	0	0	0	0	0	0	0	0	0	0	0	0	0	0	0	0	0	0	0	0	0	0	0	0	0	0	0	0	0	0	0	0	0	0	0	0	0	0	0	0	0	0	0	0
0	0	0	0	0	0	0	0	0	0	0	0	0	0	0	0	0	0	0	0	0	0	0	0	0	0	0	0	0	0	0	0	0	0	0	0	0	0	0	0	0	0	0	0	0	0	0	0	0	0
0	0	0	0	0	0	0	0	0	0	0	0	0	0	0	0	0	0	0	0	0	0	0	0	0	0	0	0	0	0	0	0	0	0	0	0	0	0	0	0	0	0	0	0	0	0	0	0	0	0
0	0	0	0	0	0	0	0	0	0	0	0	0	0	0	0	0	0	0	0	0	0	0	0	0	0	0	0	0	0	0	0	0	0	0	0	0	0	0	0	0	0	0	0	0	0	0	0	0	0
0	0	0	0	0	0	0	0	0	0	0	0	0	0	0	0	0	0	0	0	0	0	0	0	0	0	0	0	0	0	0	0	0	0	0	0	0	0	0	0	0	0	0	0	0	0	0	0	0	0
0	0	0	0	0	0	0	0	0	0	0	0	0	0	0	0	0	0	0	0	0	0	0	0	0	0	0	0	0	0	0	0	0	0	0	0	0	0	0	0	0	0	0	0	0	0	0	0	0	0
0	0	0	0	0	0	0	0	0	0	0	0	0	0	0	0	0	0	0	0	0	0	0	0	0	0	0	0	0	0	0	0	0	0	0	0	0	0	0	0	0	0	0	0	0	0	0	0	0	0
0	0	0	0	0	0	0	0	0	0	0	0	0	0	0	0	0	0	0	0	0	0	0	0	0	0	0	0	0	0	0	0	0	0	0	0	0	0	0	0	0	0	0	0	0	0	0	0	0	0
0	0	0	0	0	0	0	0	0	0	0	0	0	0	0	0	0	0	0	0	0	0	0	0	0	0	0	0	0	0	0	0	0	0	0	0	0	0	0	0	0	0	0	0	0	0	0	0	0	0
0	0	0	0	0	0	0	0	0	0	0	0	0	0	0	0	0	0	0	0	0	0	0	0	0	0	0	0	0	0	0	0	0	0	0	0	0	0	0	0	0	0	0	0	0	0	0	0	0	0
0	0	0	0	0	0	0	0	0	0	0	0	0	0	0	0	0	0	0	0	0	0	0	0	0	0	0	0	0	0	0	0	0	0	0	0	0	0	0	0	0	0	0	0	0	0	0	0	0	0
0	0	0	0	0	0	0	0	0	0	0	0	0	0	0	0	0	0	0	0	0	0	0	0	0	0	0	0	0	0	0	0	0	0	0	0	0	0	0	0	0	0	0	0	0	0	0	0	0	0
0	0	0	0	0	0	0	0	0	0	0	0	0	0	0	0	0	0	0	0	0	-0.0375082	0.00727199	0.0319401	0.0225308	0.0358042	0.0372194	0	0	0	0	0	0	0	0	0	0	0	0	0	0	0	0	0	0	0	0	0	0	0
0	0	0	0	0	0	0	0	0	0	0	0	0	0	0	0	0	0	0	0	-0.0486278	0.0196149	0.0475727	0.0223812	0.0295291	0.0173298	0.0106541	0.00426696	0.0268116	0	0	0	0	0	0	0	0	0	0	0	0	0	0	0	0	0	0	0	0	0
0	0	0	0	0	0	0	0	0	0	0	0	0	0	0	0.0476395	0.0352966	0	0	-0.0143273	-0.014501	0.0536373	0.0454113	0.024691	0.0233987	0.0138384	0.00153525	-0.0059243	-0.00454801	0.0240701	0	0	0	0	0	0	0	0	0	0	0	0	0	0	0	0	0	0	0	0
0	0	0	0	0	0	0	0	0	0	0	0	0	0	-0.00332039	0.0121558	-0.0162005	0.0336793	0.0606544	-0.0202838	0.0207873	0.0326966	0.0246467	0.0215658	0.0210659	0.000823802	0.00305699	0.00193782	0.000623751	0.00244875	0.0180361	0	0	0	0	0	0	0	0	0	0	0	0	0	0	0	0	0	0	0
0	0	0	0	0	0	0	0	0	0	0	0	0	0	-0.00246673	-0.0318033	-0.0105683	0.0799513	0.0586523	0.00133345	0.0332279	0.0311257	0.0195944	0.00838856	0.00294032	-0.000354718	-0.00255999	-0.0113952	-0.0017379	0.00681681	0.00665397	0.0105781	0.027474	0	0	0	0	0	0	0	0	0	0	0	0	0	0	0	0	0
0	0	0	0	0	0	0	0	0	0	0	0	0	-0.0108601	-0.0140182	-0.0308865	-0.00249693	0.0762835	0.0221344	0.00813649	0.0301196	0.0282171	0.0190896	0.00235198	-0.00547004	-0.0080241	-0.00094955	-0.0106222	-0.0108165	-0.00339819	0.00629492	0.0156485	0.0143421	0.00916871	0	0	0	0	0	0	0	0	0	0	0	0	0	0	0	0
0	0	0	0	0	0	0	0	0	0	0	0	0	-0.00952325	-0.029261	-0.00719072	0.00199358	0.0622602	0.0370016	-0.0156188	0.0163025	0.0316154	0.0322841	0.001079	-0.00141228	-0.0374785	-0.0426775	-0.0647454	-0.0493476	-0.0414994	-0.0297575	-0.0132056	0.0109663	0.00174031	0.00603069	0	0	0	0	0	0	0	0	0	0	0	0	0	0	0
0	0	0	0	0	0	0	0	0	0	0	0	0	-0.0396042	-0.0117244	-0.00943617	-0.0438131	-0.00777183	0.0837136	0.0132655	-0.00166495	0.013136	0.00221478	-0.0211309	0.0067564	-0.0100338	-0.0296539	-0.0187552	0.00191496	-0.00329863	-0.00393495	-0.00195447	0.00739702	-0.00540103	0.00474305	0.0182595	0	0	0	0	0	0	0	0	0	0	0	0	0	0
0	0	0	0	0	0	0	0	0	0	0	0	0	0	-0.152822	-0.0514623	0.00558167	0.0420636	0.0464252	0.0358688	-0.00479299	0.00168078	0.00711633	-0.0108449	-0.00334814	0.00343849	0.012826	-0.00754442	0.0440108	0.105996	0.0801074	0.0467191	0.0321299	0.00652811	-0.00807398	-0.0092722	-0.0162414	-0.0173404	0	0	0	0	0	0	0	0	0	0	0	0
0	0	0	0	0	0	0	0	0	0	0	0	0	0	0.00751027	0.0278419	0.021443	0.0296603	0.0529994	0.0566465	0.0226416	0.00023047	0.0153614	-0.00378409	-0.00119196	-0.00612034	-0.0144646	-0.0322323	-0.00556649	0.0136637	-0.00695539	-0.0143496	-0.00319485	-0.0138865	-0.0114459	-0.0108492	-0.0130321	0.0200021	0.0184279	0	0	0	0	0	0	0	0	0	0	0
0	0	0	0	0	0	0	0	0	0	0	0	0	-0.0213565	0.0484397	0.0664556	0.049064	0.041053	0.0514366	0.0548629	0.0345393	0.0125483	0.00324231	0.000516181	-0.000217115	-0.00311929	-0.011611	-0.026493	-0.0122048	0.00229031	-0.00893966	-0.0162193	-0.0133792	-0.0254342	-0.0237939	-0.0197124	-0.012562	-0.000501179	0.0319378	0	0	0	0	0	0	0	0	0	0	0
0	0	0	0	0	0	0	0	0	0	0	0	0	-0.0102194	0.0403946	0.0557475	0.0468163	0.0465041	0.0404456	0.0414006	0.0380392	0.0260073	9.08867e-05	-0.00277084	0.00409999	-0.00544793	-0.0100351	-0.0238389	-0.0179137	-0.000969698	-0.00842193	-0.0190897	-0.0204539	-0.0286322	-0.0224034	-0.0236423	-0.0176083	-0.00330227	0.0290345	0	0	0	0	0	0	0	0	0	0	0
0	0	0	0	0	0	0	0	0	0	0	0	0	0.013084	0.0273685	0.0387155	0.0440291	0.0394392	0.0266655	0.0328433	0.044156	0.0271319	0.0168375	0.00794857	0.00407692	-0.00512316	-0.00895812	-0.0249181	-0.0120111	0.0014569	-0.0128112	-0.0238291	-0.0182425	-0.0319542	-0.0248932	-0.0177988	-0.0117119	0.00474327	0.0255432	0	0	0	0	0	0	0	0	0	0	0
0	0	0	0	0	0	0	0	0	0	0	0	0	0.00269318	0.0375331	0.0235019	0.0243696	0.0344974	0.0285332	0.0215041	0.0342066	0.0243656	0.0161429	-0.00211275	-0.00582965	-0.0100914	-0.0156922	-0.024861	-0.0212336	-0.00498161	-0.0203776	-0.0236778	-0.0179794	-0.0307828	-0.0280845	-0.0251164	-0.0139403	0.000420421	0.0170582	0	0	0	0	0	0	0	0	0	0	0
0	0	0	0	0	0	0	0	0	0	0	0	0	0	0.0225253	0.0179275	0.0209108	0.0123287	0.0100034	0.0134778	0.00516348	0.00630731	0.0106593	0.00365771	0.000747135	-0.0206641	-0.0117433	-0.0184576	-0.0185338	-0.0160638	-0.0305196	-0.0337966	-0.00846175	-0.0234006	-0.0249326	-0.0200575	-0.0111896	-0.00277481	0.0196126	0	0	0	0	0	0	0	0	0	0	0
0	0	0	0	0	0	0	0	0	0	0	0	0	0	0	0	0.135429	0.096263	0.0619795	0.0849641	0.0899001	0.0814803	0.0716142	0.0633278	0.052332	0.0420254	0.0310808	0.0407209	0.100996	0.111886	-0.0193453	-0.0755764	0.0355606	0.0151625	-0.00876832	0.0212358	0.0596998	0.151971	0	0	0	0	0	0	0	0	0	0	0	0
0	0	0	0	0	0	0	0	0	0	0	0	0	0	0	0	0	0.0036456	-0.00155834	-0.000622216	0.00219882	0.000470235	-0.00262169	-0.0102489	-0.0105545	-0.00926042	-0.0115707	-0.0239918	-0.0223085	-0.038221	-0.0507235	-0.01262	0.00474089	-0.024521	-0.0192548	-0.000434494	0.0110254	0	0	0	0	0	0	0	0	0	0	0	0	0
0	0	0	0	0	0	0	0	0	0	0	0	0	0	0	0	0	0	-0.0144739	-0.00631306	-0.00547232	-0.00342956	-0.0120887	-0.01524	-0.01005	-0.0142068	-0.015331	-0.0269532	-0.0355516	-0.0607949	-0.0176151	-0.00608749	-0.0134624	-0.0201801	-0.0120346	0.00316848	0	0	0	0	0	0	0	0	0	0	0	0	0	0
0	0	0	0	0	0	0	0	0	0	0	0	0	0	0	0	0	0	0	-0.018324	-0.0107451	-0.00921773	-0.004364	-0.0121278	-0.0143169	-0.0167806	-0.0208046	-0.0428221	-0.0568465	-0.0131219	-0.0156786	-0.0251869	-0.00507332	-0.00873303	-0.00318143	0	0	0	0	0	0	0	0	0	0	0	0	0	0	0
0	0	0	0	0	0	0	0	0	0	0	0	0	0	0	0	0	0	0	0	0	-0.011362	-0.0139906	-0.0207407	-0.0195084	-0.020812	-0.0256207	-0.0325306	-0.0107285	-0.00925594	-0.0251719	-0.0247497	-0.00814717	-0.0202941	0	0	0	0	0	0	0	0	0	0	0	0	0	0	0	0
0	0	0	0	0	0	0	0	0	0	0	0	0	0	0	0	0	0	0	0	0	0	0	-0.0335491	-0.0182684	-0.0258931	-0.0212016	-0.0249523	-0.0238677	-0.0261597	-0.0370726	-0.0335989	0	0	0	0	0	0	0	0	0	0	0	0	0	0	0	0	0	0
0	0	0	0	0	0	0	0	0	0	0	0	0	0	0	0	0	0	0	0	0	0	0	0	0	0	0	0	0	0	0	0	0	0	0	0	0	0	0	0	0	0	0	0	0	0	0	0	0	0
0	0	0	0	0	0	0	0	0	0	0	0	0	0	0	0	0	0	0	0	0	0	0	0	0	0	0	0	0	0	0	0	0	0	0	0	0	0	0	0	0	0	0	0	0	0	0	0	0	0
0	0	0	0	0	0	0	0	0	0	0	0	0	0	0	0	0	0	0	0	0	0	0	0	0	0	0	0	0	0	0	0	0	0	0	0	0	0	0	0	0	0	0	0	0	0	0	0	0	0
0	0	0	0	0	0	0	0	0	0	0	0	0	0	0	0	0	0	0	0	0	0	0	0	0	0	0	0	0	0	0	0	0	0	0	0	0	0	0	0	0	0	0	0	0	0	0	0	0	0
0	0	0	0	0	0	0	0	0	0	0	0	0	0	0	0	0	0	0	0	0	0	0	0	0	0	0	0	0	0	0	0	0	0	0	0	0	0	0	0	0	0	0	0	0	0	0	0	0	0
0	0	0	0	0	0	0	0	0	0	0	0	0	0	0	0	0	0	0	0	0	0	0	0	0	0	0	0	0	0	0	0	0	0	0	0	0	0	0	0	0	0	0	0	0	0	0	0	0	0
0	0	0	0	0	0	0	0	0	0	0	0	0	0	0	0	0	0	0	0	0	0	0	0	0	0	0	0	0	0	0	0	0	0	0	0	0	0	0	0	0	0	0	0	0	0	0	0	0	0
0	0	0	0	0	0	0	0	0	0	0	0	0	0	0	0	0	0	0	0	0	0	0	0	0	0	0	0	0	0	0	0	0	0	0	0	0	0	0	0	0	0	0	0	0	0	0	0	0	0
0	0	0	0	0	0	0	0	0	0	0	0	0	0	0	0	0	0	0	0	0	0	0	0	0	0	0	0	0	0	0	0	0	0	0	0	0	0	0	0	0	0	0	0	0	0	0	0	0	0
0	0	0	0	0	0	0	0	0	0	0	0	0	0	0	0	0	0	0	0	0	0	0	0	0	0	0	0	0	0	0	0	0	0	0	0	0	0	0	0	0	0	0	0	0	0	0	0	0	0
0	0	0	0	0	0	0	0	0	0	0	0	0	0	0	0	0	0	0	0	0	0	0	0	0	0	0	0	0	0	0	0	0	0	0	0	0	0	0	0	0	0	0	0	0	0	0	0	0	0
0	0	0	0	0	0	0	0	0	0	0	0	0	0	0	0	0	0	0	0	0	0	0	0	0	0	0	0	0	0	0	0	0	0	0	0	0	0	0	0	0	0	0	0	0	0	0	0	0	0
0	0	0	0	0	0	0	0	0	0	0	0	0	0	0	0	0	0	0	0	0	0	0	0	0	0	0	0	0	0	0	0	0	0	0	0	0	0	0	0	0	0	0	0	0	0	0	0	0	0
0	0	0	0	0	0	0	0	0	0	0	0	0	0	0	0	0	0	0	0	0	0	0	0	0	0	0	0	0	0	0	0	0	0	0	0	0	0	0	0	0	0	0	0	0	0	0	0	0	0
0	0	0	0	0	0	0	0	0	0	0	0	0	0	0	0	0	0	0	0	0	0	0	0	0	0	0	0	0	0	0	0	0	0	0	0	0	0	0	0	0	0	0	0	0	0	0	0	0	0
0	0	0	0	0	0	0	0	0	0	0	0	0	0	0	0	0	0	0	0	0	0	0	0	0	0	0	0	0	0	0	0	0	0	0	0	0	0	0	0	0	0	0	0	0	0	0	0	0	0
0	0	0	0	0	0	0	0	0	0	0	0	0	0	0	0	0	0	0	0	0	0	0	0	0	0	0	0	0	0	0	0	0	0	0	0	0	0	0	0	0	0	0	0	0	0	0	0	0	0
0	0	0	0	0	0	0	0	0	0	0	0	0	0	0	0	0	0	0	0	0	0	0	0	0	0	0	0	0	0	0	0	0	0	0	0	0	0	0	0	0	0	0	0	0	0	0	0	0	0
0	0	0	0	0	0	0	0	0	0	0	0	0	0	0	0	0	0	0	0	0	0	0	0	0	0	0	0	0	0	0	0	0	0	0	0	0	0	0	0	0	0	0	0	0	0	0	0	0	0
0	0	0	0	0	0	0	0	0	0	0	0	0	0	0	0	0	0	0	0	0	0	0	0	0	0	0	0	0	0	0	0	0	0	0	0	0	0	0	0	0	0	0	0	0	0	0	0	0	0
0	0	0	0	0	0	0	0	0	0	0	0	0	0	0	0	0	0	0	0	0	0	0	0	0	0	0	0	0	0	0	0	0	0	0	0	0	0	0	0	0	0	0	0	0	0	0	0	0	0
0	0	0	0	0	0	0	0	0	0	0	0	0	0	0	0	0	0	0	0	0	0	0	0	0	0	0	0	0	0	0	0	0	0	0	0	0	0	0	0	0	0	0	0	0	0	0	0	0	0
0	0	0	0	0	0	0	0	0	0	0	0	0	0	0	0	0	0	0	0	0	0	0	0	0	0	0	0	0	0	0	0	0	0	0	0	0	0	0	0	0	0	0	0	0	0	0	0	0	0
0	0	0	0	0	0	0	0	0	0	0	0	0	0	0	0	0	0	0	0	0	0	0	0	0	0	0	0	0	0	0	0	0	0	0	0	0	0	0	0	0	0	0	0	0	0	0	0	0	0
0	0	0	0	0	0	0	0	0	0	0	0	0	0	0	0	0	0	0	0	0	0	0	0	0	0	0	0	0	0	0	0	0	0	0	0	0	0	0	0	0	0	0	0	0	0	0	0	0	0
0	0	0	0	0	0	0	0	0	0	0	0	0	0	0	0	0	0	0	0	-0.0286268	-0.0479498	-0.008912	-0.0592353	-0.0438232	0	0	0	0	0	0	0	0	0	0	0	0	0	0	0	0	0	0	0	0	0	0	0	0	0
0	0	0	0	0	0	0	0	0	0	0	0	0	0	0	0	-0.0150189	0.0144712	-0.0262238	-0.0468913	-0.0377313	-0.0764788	-0.0906335	-0.057128	-0.0338555	-0.0358394	-0.0257951	-0.0401857	-0.0233556	0.095812	0	0	0	0	0	0	0	0	0	0	0	0	0	0	0	0	0	0	0	0
0	0	0	0	0	0	0	0	0	0	0	0	0	0	0	-0.0254612	-0.0160765	-0.0257105	-0.0473378	-0.0607048	-0.018313	-0.07346	-0.0905907	-0.0525514	-0.0266343	-0.0638278	-0.061687	-0.0250077	-0.0456385	0.0847431	0	0	0	0	0	0	0	0	0	0	0	0	0	0	0	0	0	0	0	0
0	0	0	0	0	0	0	0	0	0	0	0	0	0	-0.0531852	-0.0216187	-0.0427549	-0.0294925	-0.0354243	-0.0270297	-0.046082	-0.0889892	-0.0987728	-0.0632492	-0.0240166	-0.0390079	-0.0602502	-0.0553383	-0.000499678	0.0728778	0	0	0	0	0	0	0	0	0	0	0	0	0	0	0	0	0	0	0	0
0	0	0	0	0	0	0	0	0	0	0	0	0	0	-0.0380701	-0.0160222	-0.0303766	-0.0373445	-0.0280537	-0.0537077	-0.0812404	-0.107902	-0.100817	-0.0839882	-0.0196879	-0.0171559	-0.0198427	-0.0702916	-0.0299824	0.0877772	0	0	0	0	0	0	0	0	0	0	0	0	0	0	0	0	0	0	0	0
0	0	0	0	0	0	0	0	0	0	0	0	0	0	-0.0293725	-0.00857816	-0.0188525	-0.0458492	-0.0391067	-0.0747239	-0.0994938	-0.123027	-0.0715381	-0.0849225	-0.0376775	-0.0199759	-0.0189662	-0.0427437	-0.0394607	0.0637767	0	0	0	0	0	0	0	0	0	0	0	0	0	0	0	0	0	0	0	0
0	0	0	0	0	0	0	0	0	0	0	0	0	0	-0.0235294	-0.0106141	-0.0245928	-0.0427745	-0.0449107	-0.0761921	-0.0994581	-0.114412	-0.0631722	-0.0603827	-0.0695308	-0.0326298	-0.0457508	-0.0240601	-0.0502825	0.00773408	0.109864	0	0	0	0	0	0	0	0	0	0	0	0	0	0	0	0	0	0	0
0	0	0	0	0	0	0	0	0	0	0	0	0	0	-0.0176469	-0.00417111	-0.0113032	-0.0323232	-0.0487057	-0.0818602	-0.0940298	-0.12774	-0.11102	-0.0374855	-0.0327814	-0.045889	-0.0377641	-0.0482578	-0.0324941	-0.0510546	0.0876164	0	0	0	0	0	0	0	0	0	0	0	0	0	0	0	0	0	0	0
0	0	0	0	0	0	0	0	0	0	0	0	0	0	-0.0254729	-0.022067	-0.0342572	-0.0437705	-0.0363046	-0.0687399	-0.0908795	-0.124462	-0.135706	-0.0994153	0.00501776	-0.0511988	-0.0602191	-0.0335957	-0.0266355	-0.0466978	-0.00967352	0.112581	0	0	0	0	0	0	0	0	0	0	0	0	0	0	0	0	0	0
0	0	0	0	0	0	0	0	0	0	0	0	0	0	-0.0371821	-0.0166086	-0.0275378	-0.0333438	-0.0489085	-0.0444762	-0.0684213	-0.0864102	-0.121403	-0.0882437	-0.069623	-0.0404896	-0.0197605	-0.0600329	-0.0343705	0.0172082	0.0205052	0.107059	0	0	0	0	0	0	0	0	0	0	0	0	0	0	0	0	0	0
0	0	0	0	0	0	0	0	0	0	0	0	0	0	-0.0280759	-0.0079116	-0.0261519	-0.0313362	-0.0312891	-0.0467821	-0.0742698	-0.0569435	-0.100232	-0.117126	-0.0483093	-0.0111527	-0.0210998	-0.0388493	-0.0421574	-0.0163846	0.0429849	0.102789	0	0	0	0	0	0	0	0	0	0	0	0	0	0	0	0	0	0
0	0	0	0	0	0	0	0	0	0	0	0	0	-0.0479869	-0.0234678	-0.0123821	-0.0222072	-0.0258245	-0.0267797	-0.0573919	-0.0846825	-0.0633336	-0.0677307	-0.102257	-0.0712481	0.00330704	-0.0194238	-0.0277029	-0.0235641	-0.00531248	0.0596297	0.0759733	0.0353918	0	0	0	0	0	0	0	0	0	0	0	0	0	0	0	0	0
0	0	0	0	0	0	0	0	0	0	0	0	0	0	-0.0288436	-0.020123	-0.0223957	-0.0255611	-0.0266694	-0.0420522	-0.0848399	-0.0793834	-0.0787323	-0.0940464	-0.0423861	0.00732473	-0.00576158	-0.0117305	-0.00373568	0.0361405	0.0513621	0.0493166	0.0199599	0	0	0	0	0	0	0	0	0	0	0	0	0	0	0	0	0
0	0	0	0	0	0	0	0	0	0	0	0	0	0	-0.0400208	-0.00276348	-0.0162793	-0.0266831	-0.0287242	-0.0350206	-0.051294	-0.0825125	-0.0945975	-0.0514286	-0.0254743	-0.0118026	-0.00489002	0.0112211	0.0185988	0.0434957	0.0549697	0.0351244	0.0137169	0	0	0	0	0	0	0	0	0	0	0	0	0	0	0	0	0
0	0	0	0	0	0	0	0	0	0	0	0	0	0	-0.0341736	-0.0206232	-0.021793	-0.0274794	-0.0279711	-0.0364282	-0.0356814	-0.0503581	-0.0889035	-0.121332	-0.0764161	0.0663626	-0.00459241	0.00936173	0.0191983	0.0425997	0.0452015	0.0167941	0.0132507	0.01293	0	0	0	0	0	0	0	0	0	0	0	0	0	0	0	0
0	0	0	0	0	0	0	0	0	0	0	0	0	0	-0.0245934	-0.0170019	-0.0227841	-0.0319351	-0.0285034	-0.0324738	-0.0314594	-0.0363133	-0.0435943	-0.0577796	-0.0343372	0.013292	0.0218196	0.0225578	0.0437575	0.0441362	0.0105504	0.00779929	0.0167027	0.0120157	0	0	0	0	0	0	0	0	0	0	0	0	0	0	0	0
0	0	0	0	0	0	0	0	0	0	0	0	0	0	-0.0244285	-0.0149363	-0.0240819	-0.0327929	-0.0323446	-0.0397287	-0.0261646	-0.0308284	-0.0285543	-0.0278607	-0.0164703	0.00721523	0.00602909	-0.000854855	0.0150761	0.00450788	0.00465943	0.0103924	0.0194761	0	0	0	0	0	0	0	0	0	0	0	0	0	0	0	0	0
0	0	0	0	0	0	0	0	0	0	0	0	0	0	-0.0376541	-0.0377977	-0.0305905	-0.019556	-0.0103531	-0.0121112	-0.0174242	-0.021809	-0.0206706	-0.00860549	-0.00860658	-0.00946523	-0.00623134	-0.000389494	0.0177606	0.0332125	0.0355573	0.0249941	0	0	0	0	0	0	0	0	0	0	0	0	0	0	0	0	0	0
0	0	0	0	0	0	0	0	0	0	0	0	0	0	0	-0.0402407	-0.0274221	-0.02293	-0.00858572	-0.00945813	-0.0128315	-0.0153161	-0.0156278	-0.0152075	-0.00668747	-0.0141631	0.000826832	0.0302645	0.0323739	0.0456745	0.0276639	0	0	0	0	0	0	0	0	0	0	0	0	0	0	0	0	0	0	0
0	0	0	0	0	0	0	0	0	0	0	0	0	0	0	-0.0375357	-0.0268107	-0.0218086	-0.0037698	0.000177951	0.00237514	-0.00338843	-0.000755828	0.00349003	0.0106531	0.0143738	0.0192661	0.0348056	0.0317403	0.0248187	0	0	0	0	0	0	0	0	0	0	0	0	0	0	0	0	0	0	0	0
0	0	0	0	0	0	0	0	0	0	0	0	0	0	0	0	-0.0384402	-0.0262999	-0.0164667	-0.00288664	-0.00107209	0.0024535	0.019556	0.0232235	0.031739	0.0192375	0.0235986	0	0	0	0	0	0	0	0	0	0	0	0	0	0	0	0	0	0	0	0	0	0	0
0	0	0	0	0	0	0	0	0	0	0	0	0	0	0	0	0	0	0	0	0	0	0	0	0	0	0	0	0	0	0	0	0	0	0	0	0	0	0	0	0	0	0	0	0	0	0	0	0	0
0	0	0	0	0	0	0	0	0	0	0	0	0	0	0	0	0	0	0	0	0	0	0	0	0	0	0	0	0	0	0	0	0	0	0	0	0	0	0	0	0	0	0	0	0	0	0	0	0	0
0	0	0	0	0	0	0	0	0	0	0	0	0	0	0	0	0	0	0	0	0	0	0	0	0	0	0	0	0	0	0	0	0	0	0	0	0	0	0	0	0	0	0	0	0	0	0	0	0	0
0	0	0	0	0	0	0	0	0	0	0	0	0	0	0	0	0	0	0	0	0	0	0	0	0	0	0	0	0	0	0	0	0	0	0	0	0	0	0	0	0	0	0	0	0	0	0	0	0	0
0	0	0	0	0	0	0	0	0	0	0	0	0	0	0	0	0	0	0	0	0	0	0	0	0	0	0	0	0	0	0	0	0	0	0	0	0	0	0	0	0	0	0	0	0	0	0	0	0	0
0	0	0	0	0	0	0	0	0	0	0	0	0	0	0	0	0	0	0	0	0	0	0	0	0	0	0	0	0	0	0	0	0	0	0	0	0	0	0	0	0	0	0	0	0	0	0	0	0	0
0	0	0	0	0	0	0	0	0	0	0	0	0	0	0	0	0	0	0	0	0	0	0	0	0	0	0	0	0	0	0	0	0	0	0	0	0	0	0	0	0	0	0	0	0	0	0	0	0	0
0	0	0	0	0	0	0	0	0	0	0	0	0	0	0	0	0	0	0	0	0	0	0	0	0	0	0	0	0	0	0	0	0	0	0	0	0	0	0	0	0	0	0	0	0	0	0	0	0	0
0	0	0	0	0	0	0	0	0	0	0	0	0	0	0	0	0	0	0	0	0	0	0	0	0	0	0	0	0	0	0	0	0	0	0	0	0	0	0	0	0	0	0	0	0	0	0	0	0	0
0	0	0	0	0	0	0	0	0	0	0	0	0	0	0	0	0	0	0	0	0	0	0	0	0	0	0	0	0	0	0	0	0	0	0	0	0	0	0	0	0	0	0	0	0	0	0	0	0	0
0	0	0	0	0	0	0	0	0	0	0	0	0	0	0	0	0	0	0	0	0	0	0	0	0	0	0	0	0	0	0	0	0	0	0	0	0	0	0	0	0	0	0	0	0	0	0	0	0	0
0	0	0	0	0	0	0	0	0	0	0	0	0	0	0	0	0	0	0	0	0	0	0	0	0	0	0	0	0	0	0	0	0	0	0	0	0	0	0	0	0	0	0	0	0	0	0	0	0	0
0	0	0	0	0	0	0	0	0	0	0	0	0	0	0	0	0	0	0	0	0	0	0	0	0	0	0	0	0	0	0	0	0	0	0	0	0	0	0	0	0	0	0	0	0	0	0	0	0	0
0	0	0	0	0	0	0	0	0	0	0	0	0	0	0	0	0	0	0	0	0	0	0	0	0	0	0	0	0	0	0	0	0	0	0	0	0	0	0	0	0	0	0	0	0	0	0	0	0	0
0	0	0	0	0	0	0	0	0	0	0	0	0	0	0	0	0	0	0	0	0	0	0	0	0	0	0	0	0	0	0	0	0	0	0	0	0	0	0	0	0	0	0	0	0	0	0	0	0	0
0	0	0	0	0	0	0	0	0	0	0	0	0	0	0	0	0	0	0	0	0	0	0	0	0	0	0	0	0	0	0	0	0	0	0	0	0	0	0	0	0	0	0	0	0	0	0	0	0	0
0	0	0	0	0	0	0	0	0	0	0	0	0	0	0	0	0	0	0	0	0	0	0	0	0	0	0	0	0	0	0	0	0	0	0	0	0	0	0	0	0	0	0	0	0	0	0	0	0	0
0	0	0	0	0	0	0	0	0	0	0	0	0	0	0	0	0	0	0	0	0	0	0	0	0	0	0	0	0	0	0	0	0	0	0	0	0	0	0	0	0	0	0	0	0	0	0	0	0	0
0	0	0	0	0	0	0	0	0	0	0	0	0	0	0	0	0	0	0	0	0	0	0	0	0	0	0	0	0	0	0	0	0	0	0	0	0	0	0	0	0	0	0	0	0	0	0	0	0	0
0	0	0	0	0	0	0	0	0	0	0	0	0	0	0	0	0	0	0	0	0	0	0	0	0	0	0	0	0	0	0	0	0	0	0	0	0	0	0	0	0	0	0	0	0	0	0	0	0	0
0	0	0	0	0	0	0	0	0	0	0	0	0	0	0	0	0	0	0	0	0	0	0	0	0	0	0	0	0	0	0	0	0	0	0	0	0	0	0	0	0	0	0	0	0	0	0	0	0	0
0	0	0	0	0	0	0	0	0	0	0	0	0	0	0	0	0	0	0	0	0	0	0	0	0	0	0	0	0	0	0	0	0	0	0	0	0	0	0	0	0	0	0	0	0	0	0	0	0	0
0	0	0	0	0	0	0	0	0	0	0	0	0	0	0	0	0	0	0	0	0	0	0	0	0	0	0	0	0	0	0	0	0	0	0	0	0	0	0	0	0	0	0	0	0	0	0	0	0	0
0	0	0	0	0	0	0	0	0	0	0	0	0	0	0	0	0	0	0	0	0	0	0	0	0	0	0	0	0	0	0	0	0	0	0	0	0	0	0	0	0	0	0	0	0	0	0	0	0	0
0	0	0	0	0	0	0	0	0	0	0	0	0	0	0	0	0	0	0	0	0	0	0	0	0	0	0	0	0	0	0	0	0	0	0	0	0	0	0	0	0	0	0	0	0	0	0	0	0	0
0	0	0	0	0	0	0	0	0	0	0	0	0	0	0	0	0	0	0	0	0	0	0	0	0	0	0	-0.0295253	0.0682986	0	0	0	0	0	0	0	0	0	0	0	0	0	0	0	0	0	0	0	0	0
0	0	0	0	0	0	0	0	0	0	0	0	0	0	0	0	0	0	0	0	0	0	0	0	0	-0.0647369	-0.0307084	-0.0282782	0.0698087	0.0995955	0	0	0	0	0	0	0	0	0	0	0	0	0	0	0	0	0	0	0	0
0	0	0	0	0	0	0	0	0	0	0	0	0	0	0	0	0	0	0	0	0	0	0	0	-0.0238946	-0.0266017	-0.0267266	-0.0350094	-0.000747949	0.0657404	0.072702	0	0	0	0	0	0	0	0	0	0	0	0	0	0	0	0	0	0	0
0	0	0	0	0	0	0	0	0	0	0	0	0	0	0	0	0	0	0	-0.00192586	-0.00864254	-0.018963	-0.0303037	-0.0528275	-0.0242785	-0.0112067	-0.0359784	-0.0475587	-0.0208752	0.0573083	0.0234687	0.0273983	0	0	0	0	0	0	0	0	0	0	0	0	0	0	0	0	0	0
0	0	0	0	0	0	0	0	0	0	0	0	0	0	0	0	0	0	-0.0330094	-0.0706661	-0.0460732	-0.00487546	-0.000204405	-0.0465022	-0.0308913	-0.0115681	-0.0264766	-0.0333183	-0.00679687	0.0525193	0.0396922	0.0500281	0.0719934	0	0	0	0	0	0	0	0	0	0	0	0	0	0	0	0	0
0	0	0	0	0	0	0	0	0	0	0	0	0	0	0	0	0	-0.0467448	-0.0392697	-0.0314849	-0.00963692	-0.0168753	-0.0109422	-0.0363685	-0.0271486	-0.0211096	-0.0236342	-0.0246907	0.0100877	0.0250085	0.0410472	0.0539551	0.0767651	0	0	0	0	0	0	0	0	0	0	0	0	0	0	0	0	0
0	0	0	0	0	0	0	0	0	0	0	0	0	0	0	0	0	-0.0420966	-0.0380499	-0.0265886	-0.0170869	-0.0116835	-0.0505671	-0.00327402	0.00773511	-0.0148921	-0.0263787	-0.0313993	0.0068012	0.0233853	0.0393688	0.0705096	0.0672917	0	0	0	0	0	0	0	0	0	0	0	0	0	0	0	0	0
0	0	0	0	0	0	0	0	0	0	0	0	0	0	0	0	-0.0305832	-0.0493069	-0.00160408	-0.0467676	-0.0240345	0.00218417	-0.0389131	0.00958765	-0.00535983	0.0300641	0.0119883	0.0447896	0.0228203	0.00671305	-0.00646173	0.0795428	0.0755714	0.0675494	0	0	0	0	0	0	0	0	0	0	0	0	0	0	0	0
0	0	0	0	0	0	0	0	0	0	0	0	0	0	0	0	-0.0331478	-0.00198355	0.0136311	-0.0465533	-0.0435894	-0.0411495	-0.034849	-0.0086752	0.00549073	0.0378568	0.0459073	0.037533	0.0395801	0.0632598	0.0198515	0.0290964	0.0742852	0.0463354	0	0	0	0	0	0	0	0	0	0	0	0	0	0	0	0
0	0	0	0	0	0	0	0	0	0	0	0	0	0	0	0	-0.0248966	-0.0021042	0.0389801	0.0154222	-0.0282002	-0.0513904	-0.00347801	-0.014369	0.00464574	0.0380798	0.0205064	0.0423743	0.053925	0.0786948	0.0267395	-0.00734538	0.0772965	0.0539356	0	0	0	0	0	0	0	0	0	0	0	0	0	0	0	0
0	0	0	0	0	0	0	0	0	0	0	0	0	0	0	0	-0.0246201	0.00824544	0.0214553	0.00255342	0.0119183	-0.027042	-0.0511716	0.0123337	0.0228839	0.043353	0.0409501	0.0416039	0.0780886	0.0815235	0.0233811	0.015296	0.0344997	0.0447637	0.0499618	0	0	0	0	0	0	0	0	0	0	0	0	0	0	0
0	0	0	0	0	0	0	0	0	0	0	0	0	0	0	-0.027774	-0.0256666	-0.00227175	0.00384455	-0.0240219	0.0138149	-0.0157846	-0.00912481	0.00460188	0.0132229	0.0354499	0.0907946	0.0362179	0.0589939	0.0233838	0.0233036	-0.0038513	0.029243	0.0259203	0.0382278	0	0	0	0	0	0	0	0	0	0	0	0	0	0	0
0	0	0	0	0	0	0	0	0	0	0	0	0	0	0	-0.187802	-0.0134795	0.0816404	0.174402	0.297817	0.262293	0.154616	0.360561	0.801739	0.902659	0.888303	0.848139	0.483871	0.434532	0.381462	0.265629	0.214814	0.252238	0.206842	0.149627	0	0	0	0	0	0	0	0	0	0	0	0	0	0	0
0	0	0	0	0	0	0	0	0	0	0	0	0	0	-0.00437622	-0.00386842	-0.00723026	-0.0011314	0.0113408	-0.00975077	-0.00739614	-0.0195605	-0.0111821	-0.022196	0.0364097	0.0142721	0.0269451	0.0144278	0.0388388	0.0321703	0.0165995	0.0148047	0.0119194	0.00958654	0.012261	0	0	0	0	0	0	0	0	0	0	0	0	0	0	0
0	0	0	0	0	0	0	0	0	0	0	0	0	-0.0158439	-0.0127201	-0.0102757	-0.0151751	-0.0114952	-0.00042376	-0.00314736	-0.0100351	-0.0169779	-0.0231842	-0.000189559	0.0249892	0.0142391	0.0217675	0.0138396	0.00687615	0.0305727	0.0346851	0.0182518	0.008358	0.00578625	-0.000657922	0	0	0	0	0	0	0	0	0	0	0	0	0	0	0
0	0	0	0	0	0	0	0	0	0	0	0	0	-0.0106081	-0.00936035	-0.0136587	-0.0162625	-0.0129987	-0.0126028	-0.0159416	-0.00871085	-0.0198516	-0.0116279	0.000511247	0.0209623	0.0163811	0.0218534	0.0032849	0.00460884	0.0191568	0.0297635	0.0258084	0.00785403	0.00872152	0.000729079	0	0	0	0	0	0	0	0	0	0	0	0	0	0	0
0	0	0	0	0	0	0	0	0	0	0	0	0	-0.0126772	-0.00291306	-0.0106198	-0.0182639	-0.010082	-0.0107241	-0.0137033	-0.0112692	-0.0129633	-0.00668447	-0.0114479	0.00535602	0.00834084	0.0166124	0.00290133	0.0096081	0.0234183	0.0156527	0.0332953	0.0110777	0.00842258	0.00387828	0	0	0	0	0	0	0	0	0	0	0	0	0	0	0
0	0	0	0	0	0	0	0	0	0	0	0	0	-0.0104827	-0.0130934	-0.0154385	-0.0217672	-0.0217741	-0.0252907	-0.01985	-0.0186114	-0.00970691	-0.0120956	-0.016628	-0.00103291	0.000345675	0.00180924	-0.00204555	0.00596073	0.00690189	0.00222256	0.0228253	0.0210806	-4.53187e-05	-0.00486531	0	0	0	0	0	0	0	0	0	0	0	0	0	0	0
0	0	0	0	0	0	0	0	0	0	0	0	0	-0.0089636	-0.0153023	-0.0166794	-0.023789	-0.0291449	-0.0227231	-0.0215303	-0.0181617	-0.014137	-0.0191501	-0.0194868	-0.0172367	0.000385365	-0.0094577	-0.0123951	0.000903607	0.00381104	-0.00451308	0.00551655	0.0333871	0.00661525	-0.00517293	0	0	0	0	0	0	0	0	0	0	0	0	0	0	0
0	0	0	0	0	0	0	0	0	0	0	0	0	-0.0090912	-0.0165516	-0.0239863	-0.0300975	-0.0269936	-0.0201208	-0.023296	-0.02019	-0.0158205	-0.0180099	-0.0174727	-0.0198132	-0.0164032	-0.0133056	-0.0151714	-0.0102768	0.00294683	-0.00383533	-0.00200183	0.0220902	0.00876259	-0.00613219	0	0	0	0	0	0	0	0	0	0	0	0	0	0	0
0	0	0	0	0	0	0	0	0	0	0	0	0	-0.0218127	-0.0170039	-0.0242158	-0.0323782	-0.0286486	-0.0270106	-0.0274645	-0.0232986	-0.0291698	-0.0252238	-0.0314776	-0.0272784	-0.0243803	-0.0189575	-0.0258918	-0.0145564	0.000340632	-0.0190713	-0.0119838	0.0099956	0.0201014	-0.00198209	0	0	0	0	0	0	0	0	0	0	0	0	0	0	0
0	0	0	0	0	0	0	0	0	0	0	0	0	0	-0.032047	-0.026381	-0.033466	-0.0289743	-0.0246473	-0.0297858	-0.0231237	-0.0269812	-0.0301265	-0.0319694	-0.027942	-0.0246855	-0.0206741	-0.0289	-0.0316007	-0.0162339	-0.0237718	-0.00902183	-0.000735194	0.00996742	0	0	0	0	0	0	0	0	0	0	0	0	0	0	0	0
0	0	0	0	0	0	0	0	0	0	0	0	0	0	0	-0.036219	-0.0359824	-0.0376214	-0.0336124	-0.0375349	-0.0292444	-0.0288433	-0.0309058	-0.0341468	-0.0450898	-0.0337339	-0.0227502	-0.0310125	-0.019175	-0.00966553	-0.014993	-0.0120341	-0.00173519	0	0	0	0	0	0	0	0	0	0	0	0	0	0	0	0	0
0	0	0	0	0	0	0	0	0	0	0	0	0	0	0	0	0	0	0	0	-0.0411779	-0.0368666	-0.0411642	-0.0451749	-0.0284745	-0.0207654	-0.0235893	-0.0308848	0	0	0	0	0	0	0	0	0	0	0	0	0	0	0	0	0	0	0	0	0	0
0	0	0	0	0	0	0	0	0	0	0	0	0	0	0	0	0	0	0	0	0	0	0	0	0	0	0	0	0	0	0	0	0	0	0	0	0	0	0	0	0	0	0	0	0	0	0	0	0	0
0	0	0	0	0	0	0	0	0	0	0	0	0	0	0	0	0	0	0	0	0	0	0	0	0	0	0	0	0	0	0	0	0	0	0	0	0	0	0	0	0	0	0	0	0	0	0	0	0	0
0	0	0	0	0	0	0	0	0	0	0	0	0	0	0	0	0	0	0	0	0	0	0	0	0	0	0	0	0	0	0	0	0	0	0	0	0	0	0	0	0	0	0	0	0	0	0	0	0	0
0	0	0	0	0	0	0	0	0	0	0	0	0	0	0	0	0	0	0	0	0	0	0	0	0	0	0	0	0	0	0	0	0	0	0	0	0	0	0	0	0	0	0	0	0	0	0	0	0	0
0	0	0	0	0	0	0	0	0	0	0	0	0	0	0	0	0	0	0	0	0	0	0	0	0	0	0	0	0	0	0	0	0	0	0	0	0	0	0	0	0	0	0	0	0	0	0	0	0	0
0	0	0	0	0	0	0	0	0	0	0	0	0	0	0	0	0	0	0	0	0	0	0	0	0	0	0	0	0	0	0	0	0	0	0	0	0	0	0	0	0	0	0	0	0	0	0	0	0	0
0	0	0	0	0	0	0	0	0	0	0	0	0	0	0	0	0	0	0	0	0	0	0	0	0	0	0	0	0	0	0	0	0	0	0	0	0	0	0	0	0	0	0	0	0	0	0	0	0	0
0	0	0	0	0	0	0	0	0	0	0	0	0	0	0	0	0	0	0	0	0	0	0	0	0	0	0	0	0	0	0	0	0	0	0	0	0	0	0	0	0	0	0	0	0	0	0	0	0	0
0	0	0	0	0	0	0	0	0	0	0	0	0	0	0	0	0	0	0	0	0	0	0	0	0	0	0	0	0	0	0	0	0	0	0	0	0	0	0	0	0	0	0	0	0	0	0	0	0	0
0	0	0	0	0	0	0	0	0	0	0	0	0	0	0	0	0	0	0	0	0	0	0	0	0	0	0	0	0	0	0	0	0	0	0	0	0	0	0	0	0	0	0	0	0	0	0	0	0	0
0	0	0	0	0	0	0	0	0	0	0	0	0	0	0	0	0	0	0	0	0	0	0	0	0	0	0	0	0	0	0	0	0	0	0	0	0	0	0	0	0	0	0	0	0	0	0	0	0	0
0	0	0	0	0	0	0	0	0	0	0	0	0	0	0	0	0	0	0	0	0	0	0	0	0	0	0	0	0	0	0	0	0	0	0	0	0	0	0	0	0	0	0	0	0	0	0	0	0	0
0	0	0	0	0	0	0	0	0	0	0	0	0	0	0	0	0	0	0	0	0	0	0	0	0	0	0	0	0	0	0	0	0	0	0	0	0	0	0	0	0	0	0	0	0	0	0	0	0	0
0	0	0	0	0	0	0	0	0	0	0	0	0	0	0	0	0	0	0	0	0	0	0	0	0	0	0	0	0	0	0	0	0	0	0	0	0	0	0	0	0	0	0	0	0	0	0	0	0	0
0	0	0	0	0	0	0	0	0	0	0	0	0	0	0	0	0	0	0	0	0	0	0	0	0	0	0	0	0	0	0	0	0	0	0	0	0	0	0	0	0	0	0	0	0	0	0	0	0	0
0	0	0	0	0	0	0	0	0	0	0	0	0	0	0	0	0	0	0	0	0	0	0	0	0	0	0	0	0	0	0	0	0	0	0	0	0	0	0	0	0	0	0	0	0	0	0	0	0	0
0	0	0	0	0	0	0	0	0	0	0	0	0	0	0	0	0	0	0	0	0	0	0	0	0	0	0	0	0	0	0	0	0	0	0	0	0	0	0	0	0	0	0	0	0	0	0	0	0	0
0	0	0	0	0	0	0	0	0	0	0	0	0	0	0	0	0	0	0	0	0	0	0	0	0	0	0	0	0	0	0	0	0	0	0	0	0	0	0	0	0	0	0	0	0	0	0	0	0	0
0	0	0	0	0	0	0	0	0	0	0	0	0	0	0	0	0	0	0	0	0	0	0	0	0	0	0	0	0	0	0	0	0	0	0	0	0	0	0	0	0	0	0	0	0	0	0	0	0	0
0	0	0	0	0	0	0	0	0	0	0	0	0	0	0	0	0	0	0	0	0	0	0	0	0	0	0	0	0	0	0	0	0	0	0	0	0	0	0	0	0	0	0	0	0	0	0	0	0	0
0	0	0	0	0	0	0	0	0	0	0	0	0	0	0	0	0	0	0	0	0	0	0	0	0	0	0	0	0	0	0	0	0	0	0	0	0	0	0	0	0	0	0	0	0	0	0	0	0	0
0	0	0	0	0	0	0	0	0	0	0	0	0	0	0	0	0	0	0	0	0	0	0	0	0	0	0	0	0	0	0	0	0	0	0	0	0	0	0	0	0	0	0	0	0	0	0	0	0	0
0	0	0	0	0	0	0	0	0	0	0	0	0	0	0	0	0	0	0	0	0	0	0	0	0	0	0	0	0	0	0	0	0	0	0	0	0	0	0	0	0	0	0	0	0	0	0	0	0	0
0	0	0	0	0	0	0	0	0	0	0	0	0	0	0	0	0	0	0	0	0	0	0	0	0	0	0	0	0	0	0	0	0	0	0	0	0	0	0	0	0	0	0	0	0	0	0	0	0	0
0	0	0	0	0	0	0	0	0	0	0	0	0	0	0	0	0	0	0	0	0	0	0	0	0	0	0	0	0	0	0	0	0	0	0	0	0	0	0	0	0	0	0	0	0	0	0	0	0	0
0	0	0	0	0	0	0	0	0	0	0	0	0	0	0	0	0	0	0	0	0	0	0	0	0	0	0	0	0	0	0	0	0	0	0	0	0	0	0	0	0	0	0	0	0	0	0	0	0	0
0	0	0	0	0	0	0	0	0	0	0	0	0	0	0	0	0	0	0	0	0	0	0	0	0	0	0	0	0	0	0	0	0	0	0	0	0	0	0	0	0	0	0	0	0	0	0	0	0	0
0	0	0	0	0	0	0	0	0	0	0	0	0	0	0	0	0	0	0	0	0	0	0	0	0	0	0	0	0	0	0	0	0	0	0	0	0	0	0	0	0	0	0	0	0	0	0	0	0	0
0	0	0	0	0	0	0	0	0	0	0	0	0	0	0	0	0	0	0	0	0	0	0	0	0	0	0	0	0	0	0	0	0	0	0	0	0	0	0	0	0	0	0	0	0	0	0	0	0	0
0	0	0	0	0	0	0	0	0	0	0	0	0	0	0	0	0	0	0	0	0	0	0	0	0	0	-0.11642	-0.194567	-0.235159	-0.169088	-0.114799	-0.0846846	-0.0905882	-0.139266	-0.182481	0	0	0	0	0	0	0	0	0	0	0	0	0	0	0
0	0	0	0	0	0	0	0	0	0	0	0	0	0	0	0	0	0	0	0	0	0	0	0	-0.0321035	-0.0373656	-0.0263236	-0.0238835	-0.0171682	-0.0087665	-0.0204539	-0.0199546	-0.00660745	-0.00529484	0.0148286	0.0272956	0	0	0	0	0	0	0	0	0	0	0	0	0	0
0	0	0	0	0	0	0	0	0	0	0	0	0	0	0	0	0	0	0	0	0	0	-0.0405637	-0.0373986	-0.0430883	-0.0282491	-0.0138324	-0.0302705	-0.0511826	-0.0166651	-0.0127491	-0.013707	-0.0107348	-0.00949944	0.0035712	0.0235656	0.0372841	0.0315542	0	0	0	0	0	0	0	0	0	0	0	0
0	0	0	0	0	0	0	0	0	0	0	0	0	0	0	0	0	0	0	0	0	-0.0441515	-0.0410256	-0.0290895	-0.0120996	-0.00671772	-0.0100439	-0.0107338	-0.00893886	-0.0205473	-0.0309496	-0.0227658	-0.00862294	-0.0185069	0.00399491	0.0145968	0.0192087	0.0352755	0.0288122	0	0	0	0	0	0	0	0	0	0	0
0	0	0	0	0	0	0	0	0	0	0	0	0	0	0	0	0	0	0	0	-0.0560798	-0.0475178	-0.0304644	-8.91118e-05	-0.00505581	-0.0118482	-0.0115265	-0.00367512	0.00689771	0.0132719	-0.00270978	-0.0127644	-0.0227373	-0.0230293	-0.00657072	0.0234048	0.0024256	0.0216519	0.0318385	0.0198698	0	0	0	0	0	0	0	0	0	0
0	0	0	0	0	0	0	0	0	0	0	0	0	0	0	0	0	0	0	-0.0560582	-0.0478632	-0.0192896	-0.00595955	-0.0175684	-0.0509118	0.00176833	-0.0318907	-0.0360813	-0.01514	0.000250722	-0.00286407	-0.00353692	-0.0336089	-0.0192255	0.00659999	-0.0104596	0.00389891	0.00698414	0.0334539	0.0242692	0	0	0	0	0	0	0	0	0	0
0	0	0	0	0	0	0	0	0	0	0	0	0	0	0	0	0	0	-0.0480923	-0.0744034	-0.0391614	-0.00824986	-0.024631	-0.0214245	-0.0379996	-0.0489914	-0.0500118	-0.0195964	-0.0331312	0.00279969	-0.00160911	-0.00448351	-0.0222511	-0.0361252	-0.00157281	-0.0182714	-0.00730717	0.00228271	0.0238679	0.0290279	0	0	0	0	0	0	0	0	0	0
0	0	0	0	0	0	0	0	0	0	0	0	0	0	0	0	0	-0.0803437	-0.0868191	-0.0694013	-0.0332226	-0.0350732	-0.0750787	-0.0662692	-0.0821088	-0.0506795	-0.02324	-0.00432196	-0.0259765	-0.0253655	0.0119778	0.00525285	0.000300252	-0.0254628	-0.0215029	-0.0203411	-0.0140596	0.00312055	0.0109748	0.0316012	0.0275003	0	0	0	0	0	0	0	0	0
0	0	0	0	0	0	0	0	0	0	0	0	0	0	0	0	-0.0453788	-0.0116953	-0.0574227	-0.0433743	-0.0629117	-0.0759304	-0.0739975	-0.0373452	-0.0232114	-0.0229089	-0.0241689	-0.0452392	-0.0145863	-0.00229525	-0.00387798	0.0131297	-0.0103422	-0.0334362	-0.028441	-0.0279187	-0.0168067	-0.0101113	0.00489517	0.0179892	0.0351092	0	0	0	0	0	0	0	0	0
0	0	0	0	0	0	0	0	0	0	0	0	0	0	0	-0.0324515	-0.0357948	-0.0590558	-0.0575251	-0.056944	-0.0708703	-0.0551691	-0.0580575	-0.0257334	-0.0196023	-0.0142485	-0.0220269	-0.0263241	-0.0128567	-0.00559115	0.00507384	-0.00923225	-0.0300853	-0.0263804	-0.0221148	-0.0193887	-0.013903	-0.0034011	0.0094906	0.0279811	0	0	0	0	0	0	0	0	0	0
0	0	0	0	0	0	0	0	0	0	0	0	0	0	0	-0.02513	-0.0537517	-0.0481662	-0.0808673	-0.0850471	-0.0610595	-0.0241858	-0.0491394	-0.0473293	-0.0167281	-0.0193934	-0.0100113	-0.021793	-0.0194518	-0.00204201	-0.0152514	-0.0210907	-0.0122994	-0.0178392	-0.00934392	-0.0107044	-0.00793374	0.01603	0.0229873	-0.00286255	0	0	0	0	0	0	0	0	0	0
0	0	0	0	0	0	0	0	0	0	0	0	0	0	0	-0.0344889	-0.0550266	-0.0465116	-0.0683599	-0.0706189	-0.0358847	-0.0251185	-0.0175897	-0.0599328	-0.00839066	-0.00330206	-0.0125848	-0.0414162	-0.0108025	-0.0180394	-0.0154883	-0.0130244	-0.0123271	-0.0159697	0.00175974	0.0180926	0.0145619	-0.000393773	-0.00702467	0	0	0	0	0	0	0	0	0	0	0
0	0	0	0	0	0	0	0	0	0	0	0	0	0	0	-0.0281924	-0.0325218	-0.0651428	-0.0647283	-0.0392264	-0.0106667	0.00839876	-0.00982867	-0.0308138	-0.00142059	-0.00611291	-0.0237758	-0.0146925	0.0089296	-0.0145238	-0.0212245	-0.0243514	-0.0208482	0.0108622	0.0159574	-0.000742436	-0.00255395	-0.0134872	-0.00723186	0	0	0	0	0	0	0	0	0	0	0
0	0	0	0	0	0	0	0	0	0	0	0	0	0	0	0	-0.0338942	-0.000739316	-0.0287365	-0.047232	-0.0303217	0.0175839	-0.00506208	-0.000715593	-0.0410726	-0.025553	-0.0155305	0.00375773	-0.0160744	0.0131996	-0.0248424	-0.0208084	-0.00394228	0.0032804	-0.00470876	-0.00734145	-0.00608836	0	0	0	0	0	0	0	0	0	0	0	0	0
0	0	0	0	0	0	0	0	0	0	0	0	0	0	0	0	-0.047376	-0.0540732	-0.00855722	-0.0644378	-0.00412052	0.0501365	-0.0312513	-0.0314201	-0.0344166	-0.0323793	-0.00321233	-0.0239236	0.00657811	-0.00630301	-0.01968	-0.00966245	0.00947938	0	0	0	0	0	0	0	0	0	0	0	0	0	0	0	0	0
0	0	0	0	0	0	0	0	0	0	0	0	0	0	0	0	0	-0.0645572	-0.0507613	-0.000363877	-0.0810253	0.0241313	-0.0105464	-0.0149332	-0.00347143	-0.00470784	0.0222165	0.0145533	-0.000420835	0.0113233	-0.0091117	0	0	0	0	0	0	0	0	0	0	0	0	0	0	0	0	0	0	0
0	0	0	0	0	0	0	0	0	0	0	0	0	0	0	0	0	0	0	0	-0.0555049	0.0287868	0.0134136	-0.00187772	-0.0123498	0.0512516	0.0233278	0	0	0	0	0	0	0	0	0	0	0	0	0	0	0	0	0	0	0	0	0	0	0
0	0	0	0	0	0	0	0	0	0	0	0	0	0	0	0	0	0	0	0	0	0	0	0	0	0	0	0	0	0	0	0	0	0	0	0	0	0	0	0	0	0	0	0	0	0	0	0	0	0
0	0	0	0	0	0	0	0	0	0	0	0	0	0	0	0	0	0	0	0	0	0	0	0	0	0	0	0	0	0	0	0	0	0	0	0	0	0	0	0	0	0	0	0	0	0	0	0	0	0
0	0	0	0	0	0	0	0	0	0	0	0	0	0	0	0	0	0	0	0	0	0	0	0	0	0	0	0	0	0	0	0	0	0	0	0	0	0	0	0	0	0	0	0	0	0	0	0	0	0
0	0	0	0	0	0	0	0	0	0	0	0	0	0	0	0	0	0	0	0	0	0	0	0	0	0	0	0	0	0	0	0	0	0	0	0	0	0	0	0	0	0	0	0	0	0	0	0	0	0
0	0	0	0	0	0	0	0	0	0	0	0	0	0	0	0	0	0	0	0	0	0	0	0	0	0	0	0	0	0	0	0	0	0	0	0	0	0	0	0	0	0	0	0	0	0	0	0	0	0
0	0	0	0	0	0	0	0	0	0	0	0	0	0	0	0	0	0	0	0	0	0	0	0	0	0	0	0	0	0	0	0	0	0	0	0	0	0	0	0	0	0	0	0	0	0	0	0	0	0
0	0	0	0	0	0	0	0	0	0	0	0	0	0	0	0	0	0	0	0	0	0	0	0	0	0	0	0	0	0	0	0	0	0	0	0	0	0	0	0	0	0	0	0	0	0	0	0	0	0
0	0	0	0	0	0	0	0	0	0	0	0	0	0	0	0	0	0	0	0	0	0	0	0	0	0	0	0	0	0	0	0	0	0	0	0	0	0	0	0	0	0	0	0	0	0	0	0	0	0
0	0	0	0	0	0	0	0	0	0	0	0	0	0	0	0	0	0	0	0	0	0	0	0	0	0	0	0	0	0	0	0	0	0	0	0	0	0	0	0	0	0	0	0	0	0	0	0	0	0
0	0	0	0	0	0	0	0	0	0	0	0	0	0	0	0	0	0	0	0	0	0	0	0	0	0	0	0	0	0	0	0	0	0	0	0	0	0	0	0	0	0	0	0	0	0	0	0	0	0
0	0	0	0	0	0	0	0	0	0	0	0	0	0	0	0	0	0	0	0	0	0	0	0	0	0	0	0	0	0	0	0	0	0	0	0	0	0	0	0	0	0	0	0	0	0	0	0	0	0
0	0	0	0	0	0	0	0	0	0	0	0	0	0	0	0	0	0	0	0	0	0	0	0	0	0	0	0	0	0	0	0	0	0	0	0	0	0	0	0	0	0	0	0	0	0	0	0	0	0
0	0	0	0	0	0	0	0	0	0	0	0	0	0	0	0	0	0	0	0	0	0	0	0	0	0	0	0	0	0	0	0	0	0	0	0	0	0	0	0	0	0	0	0	0	0	0	0	0	0
0	0	0	0	0	0	0	0	0	0	0	0	0	0	0	0	0	0	0	0	0	0	0	0	0	0	0	0	0	0	0	0	0	0	0	0	0	0	0	0	0	0	0	0	0	0	0	0	0	0
0	0	0	0	0	0	0	0	0	0	0	0	0	0	0	0	0	0	0	0	0	0	0	0	0	0	0	0	0	0	0	0	0	0	0	0	0	0	0	0	0	0	0	0	0	0	0	0	0	0
0	0	0	0	0	0	0	0	0	0	0	0	0	0	0	0	0	0	0	0	0	0	0	0	0	0	0	0	0	0	0	0	0	0	0	0	0	0	0	0	0	0	0	0	0	0	0	0	0	0
0	0	0	0	0	0	0	0	0	0	0	0	0	0	0	0	0	0	0	0	0	0	0	0	0	0	0	0	0	0	0	0	0	0	0	0	0	0	0	0	0	0	0	0	0	0	0	0	0	0
0	0	0	0	0	0	0	0	0	0	0	0	0	0	0	0	0	0	0	0	0	0	0	0	0	0	0	0	0	0	0	0	0	0	0	0	0	0	0	0	0	0	0	0	0	0	0	0	0	0
0	0	0	0	0	0	0	0	0	0	0	0	0	0	0	0	0	0	0	0	0	0	0	0	0	0	0	0	0	0	0	0	0	0	0	0	0	0	0	0	0	0	0	0	0	0	0	0	0	0
0	0	0	0	0	0	0	0	0	0	0	0	0	0	0	0	0	0	0	0	0	0	0	0	0	0	0	0	0	0	0	0	0	0	0	0	0	0	0	0	0	0	0	0	0	0	0	0	0	0
0	0	0	0	0	0	0	0	0	0	0	0	0	0	0	0	0	0	0	0	0	0	0	0	0	0	0	0	0	0	0	0	0	0	0	0	0	0	0	0	0	0	0	0	0	0	0	0	0	0
0	0	0	0	0	0	0	0	0	0	0	0	0	0	0	0	0	0	0	-0.0548503	0.01206	0.145354	0	0	0	0	0	0	0	0	0	0	0	0	0	0	0	0	0	0	0	0	0	0	0	0	0	0	0	0
0	0	0	0	0	0	0	0	0	0	0	0	0	0	0	0	0	0	0	-0.048633	-0.00625969	-0.0138405	0.0400052	0	0	0	0	0	0	0	0	0	0	0	0	0	0	0	0	0	0	0	0	0	0	0	0	0	0	0
0	0	0	0	0	0	0	0	0	0	0	0	0	0	0	0	0	0	-0.0417588	-0.0151625	0.0172308	-0.0256877	-0.0272658	-0.034172	-0.0204864	0.00641953	0.0333344	0.0533447	0.0438301	0.038635	0.0560312	0	0	0	0	0	0	0	0	0	0	0	0	0	0	0	0	0	0	0
0	0	0	0	0	0	0	0	0	0	0	0	0	0	0	0	0	-0.472645	-0.216473	-0.119998	-0.148351	-0.140786	-0.125445	-0.0484153	-0.0234882	0.00797997	-0.0305501	-0.0650217	-0.145826	-0.207504	-0.240532	-0.177154	0	0	0	0	0	0	0	0	0	0	0	0	0	0	0	0	0	0
0	0	0	0	0	0	0	0	0	0	0	0	0	0	0	-0.02171	-0.0464959	-0.061451	-0.00675922	-0.0120317	-0.0583266	-0.0466314	-0.0412458	-0.0775787	-0.0481949	0.0146245	0.0421216	0.0275524	0.023095	-0.00902308	0.0312236	0.0608859	0.0521203	0.0475655	0	0	0	0	0	0	0	0	0	0	0	0	0	0	0	0
0	0	0	0	0	0	0	0	0	0	0	0	0	0	-0.022808	0.0053971	-0.0372303	-0.082865	-0.0281432	-0.0215518	-0.0490273	-0.0747792	-0.0636539	-0.0785982	-0.0488892	0.0161877	0.0283998	0.0476843	0.0352693	0.00548858	0.00403554	0.0308324	0.0462042	0.0331412	0	0	0	0	0	0	0	0	0	0	0	0	0	0	0	0
0	0	0	0	0	0	0	0	0	0	0	0	0	-0.0422491	-0.0114208	-0.0115476	-0.0311512	-0.0823281	-0.0376165	-0.0237316	-0.0463716	-0.0607933	-0.05828	-0.0322705	-0.0282189	0.0270689	0.0536885	0.0536655	0.0278064	0.0108205	-0.00444636	0.0227963	0.0491138	0.0188594	0.0375041	0	0	0	0	0	0	0	0	0	0	0	0	0	0	0
0	0	0	0	0	0	0	0	0	0	0	0	0	0	-0.0127799	-0.0181718	-0.047194	-0.0680288	-0.046214	-0.0356234	-0.0320044	-0.039861	-0.0363858	-0.00644002	-0.00753837	0.0131876	0.0621439	0.0517175	0.019619	0.0132323	0.00219542	0.0193674	0.0416055	0.022476	0.0286893	0	0	0	0	0	0	0	0	0	0	0	0	0	0	0
0	0	0	0	0	0	0	0	0	0	0	0	0	-0.101729	-0.0495684	-0.0755094	0.00831733	0.0690868	-0.0171509	-0.0595175	-0.0260832	-0.0945819	-0.0764323	0.0830969	0.107111	0.261072	0.312954	0.17137	0.0839579	0.0441039	0.0235537	0.0434747	0.0526364	0.0311099	0.0154751	0	0	0	0	0	0	0	0	0	0	0	0	0	0	0
0	0	0	0	0	0	0	0	0	0	0	0	0	-0.0191142	0.00276322	0.0018186	-0.0289817	-0.0954804	-0.0501979	-0.0365008	-0.0150488	-0.0242368	0.0013925	0.0210604	0.0147559	0.0259845	0.0236788	0.0194593	0.0155638	0.00965667	0.00831241	-0.0044566	0.023521	0.0226411	0.0255096	0.0356544	0	0	0	0	0	0	0	0	0	0	0	0	0	0
0	0	0	0	0	0	0	0	0	0	0	0	0	-0.0167599	0.0257334	-0.0174589	-0.0308453	-0.0548896	-0.0357999	-0.0490897	0.0129994	0.0110332	0.0188587	0.0213887	0.0126921	0.0266703	-0.00179046	0.00739062	0.00695416	0.00323236	0.00309064	-0.00869682	0.0122567	0.0218983	0.0233585	0.0200584	0	0	0	0	0	0	0	0	0	0	0	0	0	0
0	0	0	0	0	0	0	0	0	0	0	0	-0.0222533	-0.00278469	0.0210786	0.0183497	-0.0100866	-0.0258431	-0.016246	-0.00809278	2.33354e-05	-0.0136062	0.0158759	0.0176662	0.0150465	0.0112673	-0.00151171	0.00175552	-0.00089562	0.0137551	0.00667421	0.00141021	0.0189673	0.0232083	0.0118591	0.0167333	0	0	0	0	0	0	0	0	0	0	0	0	0	0
0	0	0	0	0	0	0	0	0	0	0	0	-0.0167251	0.00925349	0.0120356	0.0104169	-0.0111837	-0.0127507	-0.0138003	-0.0251984	-0.0184604	-0.015361	0.00179141	0.010632	-0.00415434	0.00179326	-0.00387246	-0.00725738	-0.00280623	0.0139648	0.00496855	0.0036388	0.0155485	0.00988996	0.0135377	0.0109281	0	0	0	0	0	0	0	0	0	0	0	0	0	0
0	0	0	0	0	0	0	0	0	0	0	0	-0.0142662	-0.000983146	0.00250515	0.017321	0.00113425	-0.0203088	-0.0155001	-0.0170528	-0.00632552	-0.0138217	-0.0149232	-0.00361163	-0.00533666	-0.00366207	-0.0106344	-0.00647067	-0.00673439	0.00670986	0.011495	0.000123048	0.0134366	0.00914013	0.0107632	0.0102905	0	0	0	0	0	0	0	0	0	0	0	0	0	0
0	0	0	0	0	0	0	0	0	0	0	0	-0.0123891	0.000370482	0.00864566	0.0102431	0.00421949	-0.012149	-0.0229774	-0.0130982	-0.0178925	-0.0238943	-0.0276155	-0.00213648	-0.0100183	-0.00989661	-0.00176943	-0.00169523	-0.00680456	0.0106903	0.00538517	-0.000175299	0.0113261	0.0136606	0.00528108	0.00810669	0.012986	0	0	0	0	0	0	0	0	0	0	0	0	0
0	0	0	0	0	0	0	0	0	0	0	0	-0.00924192	-0.0137841	0.0129518	0.00990448	0.0111866	-0.00341689	-0.0128333	-0.00745417	-0.0235345	-0.0285884	-0.0249244	-0.0120961	0.00219431	-0.00173393	-0.00282376	-0.0197705	-0.00644514	0.00157553	-0.000720646	0.0046995	0.00677347	-0.00135775	0.00762425	0.00565699	0	0	0	0	0	0	0	0	0	0	0	0	0	0
0	0	0	0	0	0	0	0	0	0	0	0	-0.108015	-0.0777031	-0.000159209	0.0542062	0.0441105	0.0164351	0.0050007	-0.0038442	0.00173805	-0.0373679	-0.0682201	-0.0350126	0.0288992	0.0992748	0.0948831	0.0298573	0.0197592	0.0242547	0.00258495	-0.00054006	0.0190727	0.0268586	0.0331398	0.0518748	0	0	0	0	0	0	0	0	0	0	0	0	0	0
0	0	0	0	0	0	0	0	0	0	0	0	-0.022358	0.0243798	-0.000732722	-0.00357698	-0.00361025	-0.00270197	-0.00467372	-0.0127476	-0.0138578	-0.0191652	-0.0173371	-0.0171936	0.00610426	-0.00686869	-0.00472221	-0.0164207	-0.00918797	0.00448121	-0.00160566	-0.00865307	0.00386087	-0.00282159	0.00387873	0	0	0	0	0	0	0	0	0	0	0	0	0	0	0
0	0	0	0	0	0	0	0	0	0	0	0	-0.0207094	0.0157974	-0.00907623	-0.0078787	-0.00812804	-0.00673371	-0.0100681	-0.00710746	-0.020677	-0.0165646	-0.0214018	-0.0136502	0.00220167	-0.00904037	-0.00945527	-0.0111379	-0.00600426	0.00211044	-0.00233875	-0.000876165	0.00672006	0.00291361	0.0108148	0	0	0	0	0	0	0	0	0	0	0	0	0	0	0
0	0	0	0	0	0	0	0	0	0	0	0	-0.0140611	0.00487463	-0.00633564	-0.00496639	-0.0133417	-0.00705326	-0.00646929	-0.0134104	-0.0194574	-0.0217197	-0.0184664	-0.0239354	-0.00440164	-0.00721133	-0.0120299	-0.0252018	-0.00718926	0.00259417	-0.00076266	-0.0024693	0.00641359	-0.00114238	0	0	0	0	0	0	0	0	0	0	0	0	0	0	0	0
0	0	0	0	0	0	0	0	0	0	0	0	0	-0.0127342	-0.0145925	-0.0125608	-0.0156594	-0.00834257	-0.00939927	-0.0207011	-0.0190828	-0.0289051	-0.0238452	-0.023053	-0.0102853	-0.0154472	-0.0148248	-0.0191797	-0.0154724	-0.00288369	-0.0065807	-0.00361388	0.00148781	0.00256327	0	0	0	0	0	0	0	0	0	0	0	0	0	0	0	0
0	0	0	0	0	0	0	0	0	0	0	0	0	0	-0.0289374	-0.0139185	-0.0178349	-0.0107059	-0.0152772	-0.0114463	-0.0180245	-0.0183646	-0.0209342	-0.0193784	-0.00533966	-0.0118654	-0.0122297	-0.0196454	-0.0117685	-0.00881423	-0.0085741	-0.00824758	0	0	0	0	0	0	0	0	0	0	0	0	0	0	0	0	0	0
0	0	0	0	0	0	0	0	0	0	0	0	0	0	0	0	-0.0384803	-0.0389014	-0.0390784	-0.0288627	-0.0233283	-0.0292687	-0.0241429	-0.02617	-0.0114727	-0.0100666	-0.0141073	-0.0192384	-0.0147181	0	0	0	0	0	0	0	0	0	0	0	0	0	0	0	0	0	0	0	0	0
0	0	0	0	0	0	0	0	0	0	0	0	0	0	0	0	0	-0.0348434	-0.028434	-0.03118	-0.0327428	-0.0228051	-0.0248293	-0.0232188	-0.00440779	-0.0144873	-0.0164996	0	0	0	0	0	0	0	0	0	0	0	0	0	0	0	0	0	0	0	0	0	0	0
0	0	0	0	0	0	0	0	0	0	0	0	0	0	0	0	0	0	0	0	0	0	0	0	0	0	0	0	0	0	0	0	0	0	0	0	0	0	0	0	0	0	0	0	0	0	0	0	0	0
0	0	0	0	0	0	0	0	0	0	0	0	0	0	0	0	0	0	0	0	0	0	0	0	0	0	0	0	0	0	0	0	0	0	0	0	0	0	0	0	0	0	0	0	0	0	0	0	0	0
0	0	0	0	0	0	0	0	0	0	0	0	0	0	0	0	0	0	0	0	0	0	0	0	0	0	0	0	0	0	0	0	0	0	0	0	0	0	0	0	0	0	0	0	0	0	0	0	0	0
0	0	0	0	0	0	0	0	0	0	0	0	0	0	0	0	0	0	0	0	0	0	0	0	0	0	0	0	0	0	0	0	0	0	0	0	0	0	0	0	0	0	0	0	0	0	0	0	0	0
0	0	0	0	0	0	0	0	0	0	0	0	0	0	0	0	0	0	0	0	0	0	0	0	0	0	0	0	0	0	0	0	0	0	0	0	0	0	0	0	0	0	0	0	0	0	0	0	0	0
0	0	0	0	0	0	0	0	0	0	0	0	0	0	0	0	0	0	0	0	0	0	0	0	0	0	0	0	0	0	0	0	0	0	0	0	0	0	0	0	0	0	0	0	0	0	0	0	0	0
0	0	0	0	0	0	0	0	0	0	0	0	0	0	0	0	0	0	0	0	0	0	0	0	0	0	0	0	0	0	0	0	0	0	0	0	0	0	0	0	0	0	0	0	0	0	0	0	0	0
0	0	0	0	0	0	0	0	0	0	0	0	0	0	0	0	0	0	0	0	0	0	0	0	0	0	0	0	0	0	0	0	0	0	0	0	0	0	0	0	0	0	0	0	0	0	0	0	0	0
0	0	0	0	0	0	0	0	0	0	0	0	0	0	0	0	0	0	0	0	0	0	0	0	0	0	0	0	0	0	0	0	0	0	0	0	0	0	0	0	0	0	0	0	0	0	0	0	0	0
0	0	0	0	0	0	0	0	0	0	0	0	0	0	0	0	0	0	0	0	0	0	0	0	0	0	0	0	0	0	0	0	0	0	0	0	0	0	0	0	0	0	0	0	0	0	0	0	0	0
0	0	0	0	0	0	0	0	0	0	0	0	0	0	0	0	0	0	0	0	0	0	0	0	0	0	0	0	0	0	0	0	0	0	0	0	0	0	0	0	0	0	0	0	0	0	0	0	0	0
0	0	0	0	0	0	0	0	0	0	0	0	0	0	0	0	0	0	0	0	0	0	0	0	0	0	0	0	0	0	0	0	0	0	0	0	0	0	0	0	0	0	0	0	0	0	0	0	0	0
0	0	0	0	0	0	0	0	0	0	0	0	0	0	0	0	0	0	0	0	0	0	0	0	0	0	0	0	0	0	0	0	0	0	0	0	0	0	0	0	0	0	0	0	0	0	0	0	0	0
0	0	0	0	0	0	0	0	0	0	0	0	0	0	0	0	0	0	0	0	0	0	0	0	0	0	0	0	0	0	0	0	0	0	0	0	0	0	0	0	0	0	0	0	0	0	0	0	0	0
0	0	0	0	0	0	0	0	0	0	0	0	0	0	0	0	0	0	0	0	0	0	0	0	0	0	0	0	0	0	0	0	0	0	0	0	0	0	0	0	0	0	0	0	0	0	0	0	0	0
0	0	0	0	0	0	0	0	0	0	0	0	0	0	0	0	0	0	0	0	0	0	0	0	0	0	0	0	0	0	0	0	0	0	0	0	0	0	0	0	0	0	0	0	0	0	0	0	0	0
0	0	0	0	0	0	0	0	0	0	0	0	0	0	0	0	0	0	0	0	0	0	0	0	0	0	0	0	0	0	0	0	0	0	0	0	0	0	0	0	0	0	0	0	0	0	0	0	0	0
0	0	0	0	0	0	0	0	0	0	0	0	0	0	0	0	0	0	0	0	0	0	0	0	0	0	0	0	0	0	0	0	0	0	0	0	0	0	0	0	0	0	0	0	0	0	0	0	0	0
0	0	0	0	0	0	0	0	0	0	0	0	0	0	0	0	0	0	0	0	0	0	0	0	0	0	0	0	0	0	0	0	0	0	0	0	0	0	0	0	0	0	0	0	0	0	0	0	0	0
0	0	0	0	0	0	0	0	0	0	0	0	0	0	0	0	0	0	0	0	0	0	0	0	0	0	0	0	0	0	0	0	0	0	0	0	0	0	0	0	0	0	0	0	0	0	0	0	0	0
0	0	0	0	0	0	0	0	0	0	0	0	0	0	0	0	0	0	0	0	0	0	0	0	0	0	0	0	0	0	0	0	0	0	0	0	0	0	0	0	0	0	0	0	0	0	0	0	0	0
0	0	0	0	0	0	0	0	0	0	0	0	0	0	0	0	0	0	0	0	0	0	0	0	0	0	0	0	0	0	0	0	0	0	0	0	0	0	0	0	0	0	0	0	0	0	0	0	0	0
0	0	0	0	0	0	0	0	0	0	0	0	0	0	0	0	0	0	0	0	0	0	0	0	0	0	0	0	0	0	0	0	0	0	0	0	0	0	0	0	0	0	0	0	0	0	0	0	0	0
0	0	0	0	0	0	0	0	0	0	0	0	0	0	0	0	0	0	0	0	0	0	0	0	0	0	0	0	0	0	0	0	0	0	0	0	0	0	0	0	0	0	0	0	0	0	0	0	0	0
0	0	0	0	0	0	0	0	0	0	0	0	0	0	0	0	0	0	0	0	0	0	0	0	0	0	0	0	0	0	0	0	0	0	0	0	0	0	0	0	0	0	0	0	0	0	0	0	0	0
0	0	0	0	0	0	0	0	0	0	0	0	0	0	0	0	0	0	0	0	0	0	0	0	0	0	0	0	0	0	0	0	0	0	0	0	0	0	0	0	0	0	0	0	0	0	0	0	0	0
0	0	0	0	0	0	0	0	0	0	0	0	0	0	0	0	0	0	0	0	0	0	0	0	0	0	0	0	0	0	0	0	0	0	0	0	0	0	0	0	0	0	0	0	0	0	0	0	0	0
0	0	0	0	0	0	0	0	0	0	0	0	0	0	0	0	0	0	0	0	0	0	0	0	0	0	0	0	0	0	0	0	0	-0.0470028	-0.0197201	-0.00478715	-0.010863	-0.00275886	0.00629856	0.0208584	0.0263018	0.0310191	0.0282742	0	0	0	0	0	0	0
0	0	0	0	0	0	0	0	0	0	0	0	0	0	0	0	0	0	0	0	0	0	0	0	0	0	0	0	0	0	-0.0210855	-0.0238067	-0.0219593	-0.0421875	-0.0213688	-0.00117056	-0.0140835	-0.00789464	0.0016345	-0.00368827	0.0187821	0.00177892	-0.00773019	0.0293346	0.0298123	0.0301573	0	0	0	0
0	0	0	0	0	0	0	0	0	0	0	0	0	0	0	0	0	0	0	0	0	0	0	0	0	0	0	0	-0.0266467	-0.0188435	-0.0273158	-0.0238753	-0.00623843	-0.0339135	-0.0194077	-0.00413889	-0.00311398	-0.00185943	-0.00118399	-0.0181761	-0.0051362	0.000283472	-0.0213275	0.0103672	0.0307642	0.0292869	0.0346764	0.0744341	0	0
0	0	0	0	0	0	0	0	0	0	0	0	0	0	0	0	0	0	0	0	0	0	0	0	0	0	0	0	-0.0264265	-0.0156489	-0.0260898	-0.013332	-0.0095236	-0.0377557	-0.0304716	-0.0210604	-0.0185115	-0.0180673	-0.0210502	-0.0242432	-0.0257241	-0.021656	-0.0262149	-0.0375441	0.0309858	0.0241059	0.0329197	0.050086	0	0
0	0	0	0	0	0	0	0	0	0	0	0	0	0	0	0	0	0	0	0	0	0	0	0	0	0	0	-0.0256308	-0.0209642	-0.0122081	-0.0396496	-0.00460148	0.0335437	-0.0312198	-0.0359458	-0.0304717	-0.0492391	-0.0361458	0.000717023	-0.0118928	-0.0273995	-0.0277083	-0.0315613	-0.0514355	0.0167855	0.0308429	0.0394123	0.0398024	0.0558553	0
0	0	0	0	0	0	0	0	0	0	0	0	0	0	0	0	0	0	0	0	0	0	0	0	0	0	-0.0294328	-0.020988	-0.0236001	-0.00855697	-0.0224729	0.0127622	-0.00374121	-0.0344345	-0.0602995	-0.0520813	-0.0498531	-0.0147217	0.0186412	0.00882412	-0.014177	-0.0401789	-0.0365893	-0.0485409	-0.00214321	0.0429993	0.0293143	0.0344906	0.0424747	0
0	0	0	0	0	0	0	0	0	0	0	0	0	0	0	0	0	0	0	0	0	0	0	0	0	-0.0816121	-0.06906	-0.070859	-0.0345374	-0.0113396	-0.0415738	-0.253552	-0.46117	-0.315068	-0.123199	-0.135944	-0.136265	-0.102779	-0.0508927	-0.0317411	-0.0266863	-0.0455421	-0.0269515	0.00820906	0.0324097	0.0826105	0.0589091	0.0353632	0.0316903	-0.000723977
0	0	0	0	0	0	0	0	0	0	0	0	0	0	0	0	0	0	0	0	0	0	0	0	-0.0253744	-0.0133709	-0.0125343	0.010756	-0.00558054	-0.0240827	-0.0652353	-0.0608903	-0.0254485	-0.0422201	-0.0151362	-0.0294606	0.0316707	-0.0195902	-0.0268418	-0.0175908	0.00987752	-0.0233614	-0.0485696	-0.0362024	-0.0291491	0.00206962	0.00823469	0.0174161	0.0139362	0.00657959
0	0	0	0	0	0	0	0	0	0	0	0	0	0	0	0	0	0	0	0	0	0	0	-0.0298514	-0.00923469	-0.0110793	0.0196905	-0.0196231	-0.0496731	-0.0355879	-0.0352629	-0.0143977	-0.0223707	-0.0300849	-0.0389619	-0.000269283	-0.0318467	-0.032181	-0.0143437	-0.0121884	0.00607233	-0.0128819	-0.0306091	-0.0347986	0.0020141	0.0302039	-0.00124907	0.00477238	0.000569331	-0.0132258
0	0	0	0	0	0	0	0	0	0	0	0	0	0	0	0	0	0	0	0	0	0	0	-0.0262087	-0.00950658	-0.0102326	0.000811921	-0.0559149	-0.0322589	-0.0320077	-0.0236251	-0.040152	-0.02512	-0.0519891	-0.0193104	-0.00213916	-0.0419915	-0.0213641	-0.00705555	-0.00293133	0.014741	-0.00459809	-0.0234355	-0.0248292	-5.63709e-05	0.013683	-0.00322476	-0.00510959	-0.0106114	-0.0180819
0	0	0	0	0	0	0	0	0	0	0	0	0	0	0	0	0	0	0	0	0	0	0	-0.0141548	-0.0251076	-0.0247251	-0.0225922	-0.0420342	-0.0394421	-0.0478967	-0.0521382	-0.0713372	-0.0402269	-0.025627	-0.0115637	-0.0412638	-0.0363762	0.00296134	-0.00490143	0.0053618	0.0198273	-0.0263699	-0.0202938	-0.0180185	-0.0145853	0.00346857	-0.00549314	-0.0114669	-0.0145968	-0.0176957
0	0	0	0	0	0	0	0	0	0	0	0	0	0	0	0	0	0	0	0	0	0	0	-0.050163	-0.0776031	0.0324208	-0.00597345	-0.0275852	-0.0633284	-0.0722426	-0.0784521	-0.0818063	-0.0351185	-0.0221289	-0.0226861	-0.0263278	-0.0199808	-0.021354	-0.0174318	0.000871304	0.0167464	-0.0242005	-0.0218957	-0.0257254	0.00615975	0.00893261	-0.0115211	-0.0181298	-0.021692	-0.0236846
0	0	0	0	0	0	0	0	0	0	0	0	0	0	0	0	0	0	0	0	0	0	0	-0.07229	-0.0543234	0.0228037	-0.00711495	-0.0614459	-0.0770763	-0.0568717	-0.0730175	-0.040232	-0.043265	-0.0256495	-0.0174418	-0.0205339	-0.0305465	-0.0343696	-0.0147534	0.0044144	0.0265615	-0.0159644	-0.0163755	-0.00947146	-0.00313241	-0.00977013	-0.00783931	-0.0104758	-0.0119298	0
0	0	0	0	0	0	0	0	0	0	0	0	0	0	0	0	0	0	0	0	0	0	0	-0.09974	-0.0554245	-0.00483532	-0.0041716	-0.0431138	-0.0741258	-0.0860978	-0.0480639	-0.0245736	-0.0602789	-0.0332009	-0.014061	-0.00727065	-0.0350859	-0.0312616	0.00293401	0.0138074	0.0175716	-0.000932606	-0.00664915	-0.00350138	0.000833551	-0.00175244	-0.0124447	-0.0164911	-0.0127214	0
0	0	0	0	0	0	0	0	0	0	0	0	0	0	0	0	0	0	0	0	0	0	0	-0.065317	-0.0183623	-0.0025919	0.0100384	-0.042139	-0.130151	-0.128881	-0.0674695	-0.0765453	-0.0746545	0.0276342	0.0642231	0.0685764	-0.0322133	-0.0180749	0.0408395	0.0699137	0.0534667	-0.00181953	-0.0177497	0.0110883	0.0111203	0.00378234	-0.000800312	-0.004367	0	0
0	0	0	0	0	0	0	0	0	0	0	0	0	0	0	0	0	0	0	0	0	0	0	0	-0.061823	0.00218191	-0.0120342	-0.068456	-0.0577947	-0.0345417	-0.0286192	-0.0256296	-0.00689283	-0.0349829	-0.0257002	-0.0343326	-0.0436151	-0.012405	0.00782403	0.0161853	-0.00277603	0.00123284	0.00973964	0.00410371	0.00220914	-0.00642322	-0.00984374	-0.0138455	0	0
0	0	0	0	0	0	0	0	0	0	0	0	0	0	0	0	0	0	0	0	0	0	0	0	0	-0.0377109	-0.0170889	-0.0224757	-0.0601581	-0.054662	-0.0208144	0.00168654	-0.00312722	-0.0193968	-0.0135222	-0.0372943	-0.0381305	-0.0123346	0.0201042	0.0153657	-0.000261504	0.0143098	0.00756466	0.00698216	-0.00706708	-0.0127291	-0.014517	0	0	0
0	0	0	0	0	0	0	0	0	0	0	0	0	0	0	0	0	0	0	0	0	0	0	0	0	0	0	-0.0281619	-0.0292699	-0.0216712	-0.0933974	-0.0149306	0.0181453	0.0252083	-0.0309855	-0.0316284	-0.0219133	-0.00543904	0.0152118	0.0130356	-0.0069981	0.00680906	0.0179665	0.00853012	0.00445866	0	0	0	0	0
0	0	0	0	0	0	0	0	0	0	0	0	0	0	0	0	0	0	0	0	0	0	0	0	0	0	0	0	-0.0442377	-0.0414386	-0.0819703	-0.0916409	-0.048095	-0.0434583	-0.00139646	-0.00342095	-0.0153328	0.00551727	0.0187693	0.00556092	0.0023796	0.0154877	0.00340222	-0.00308305	0	0	0	0	0	0
0	0	0	0	0	0	0	0	0	0	0	0	0	0	0	0	0	0	0	0	0	0	0	0	0	0	0	0	0	0.00142367	0.00468168	-0.0432247	-0.0689418	-0.0534315	-0.0329529	-0.00698002	0.0033202	0.0151962	-0.00872007	0.00853843	0.022489	0.00714166	-0.00835706	0	0	0	0	0	0	0
0	0	0	0	0	0	0	0	0	0	0	0	0	0	0	0	0	0	0	0	0	0	0	0	0	0	0	0	0	0	-0.0107157	0.0463653	-0.0285351	-0.0617045	-0.0411789	-0.00941688	0.00971996	-0.00365084	-0.00701548	0.00376774	-0.00950969	-0.0232525	0	0	0	0	0	0	0	0
0	0	0	0	0	0	0	0	0	0	0	0	0	0	0	0	0	0	0	0	0	0	0	0	0	0	0	0	0	0	0	0	0	0	0	0	0	0	0	0	0	0	0	0	0	0	0	0	0	0
0	0	0	0	0	0	0	0	0	0	0	0	0	0	0	0	0	0	0	0	0	0	0	0	0	0	0	0	0	0	0	0	0	0	0	0	0	0	0	0	0	0	0	0	0	0	0	0	0	0
0	0	0	0	0	0	0	0	0	0	0	0	0	0	0	0	0	0	0	0	0	0	0	0	0	0	0	0	0	0	0	0	0	0	0	0	0	0	0	0	0	0	0	0	0	0	0	0	0	0
0	0	0	0	0	0	0	0	0	0	0	0	0	0	0	0	0	0	0	0	0	0	0	0	0	0	0	0	0	0	0	0	0	0	0	0	0	0	0	0	0	0	0	0	0	0	0	0	0	0
0	0	0	0	0	0	0	0	0	0	0	0	0	0	0	0	0	0	0	0	0	0	0	0	0	0	0	0	0	0	0	0	0	0	0	0	0	0	0	0	0	0	0	0	0	0	0	0	0	0
0	0	0	0	0	0	0	0	0	0	0	0	0	0	0	0	0	0	0	0	0	0	0	0	0	0	0	0	0	0	0	0	0	0	0	0	0	0	0	0	0	0	0	0	0	0	0	0	0	0
0	0	0	0	0	0	0	0	0	0	0	0	0	0	0	0	0	0	0	0	0	0	0	0	0	0	0	0	0	0	0	0	0	0	0	0	0	0	0	0	0	0	0	0	0	0	0	0	0	0
0	0	0	0	0	0	0	0	0	0	0	0	0	0	0	0	0	0	0	0	0	0	0	0	0	0	0	0	0	0	0	0	0	0	0	0	0	0	0	0	0	0	0	0	0	0	0	0	0	0
0	0	0	0	0	0	0	0	0	0	0	0	0	0	0	0	0	0	0	0	0	0	0	0	0	0	0	0	0	0	0	0	0	0	0	0	0	0	0	0	0	0	0	0	0	0	0	0	0	0
0	0	0	0	0	0	0	0	0	0	0	0	0	0	0	0	0	0	0	0	0	0	0	0	0	0	0	0	0	0	0	0	0	0	0	0	0	0	0	0	0	0	0	0	0	0	0	0	0	0
0	0	0	0	0	0	0	0	0	0	0	0	0	0	0	0	0	0	0	0	0	0	0	0	0	0	0	0	0	0	0	0	0	0	0	0	0	0	0	0	0	0	0	0	0	0	0	0	0	0
0	0	0	0	0	0	0	0	0	0	0	0	0	0	0	0	0	0	0	0	0	0	0	0	0	0	0	0	0	0	0	0	0	0	0	0	0	0	0	0	0	0	0	0	0	0	0	0	0	0
0	0	0	0	0	0	0	0	0	0	0	0	0	0	0	0	0	0	0	0	0	0	0	0	0	0	0	0	0	0	0	0	0	0	0	0	0	0	0	0	0	0	0	0	0	0	0	0	0	0
0	0	0	0	0	0	0	0	0	0	0	0	0	0	0	0	0	0	0	0	0	0	0	0	0	0	0	0	0	0	0	0	0	0	0	0	0	0	0	0	0	0	0	0	0	0	0	0	0	0
0	0	0	0	0	0	0	0	0	0	0	0	0	0	0	0	0	0	0	0	0	0	0	0	0	0	0	0	0	0	0	0	0	0	0	0	0	0	0	0	0	0	0	0	0	0	0	0	0	0
0	0	0	0	0	0	0	0	0	0	0	0	0	0	0	0	0	0	0	0	0	0	0	0	0	0	0	0	0	0	0	0	0	0	0	0	0	0	0	0	0	0	0	0	0	0	0	0	0	0
0	0	0	0	0	0	0	0	0	0	0	0	0	0	0	0	0	0	0	0	0	0	0	0	0	0	0	0	0	0	0	0	0	0	0	0	0	0	0	0	0	0	0	0	0	0	0	0	0	0
0	0	0	0	0	0	0	0	0	0	0	0	0	0	0	0	0	0	0	0	0	0	0	0	0	0	0	0	0	0	0	0	0	0	0	0	0	0	0	0	0	0	0	0	0	0	0	0	0	0
0	0	0	0	0	0	0	0	0	0	0	0	0	0	0	0	0	0	0	0	0	0	0	0	0	0	0	0	0	0	0	0	0	0	0	0	0	0	0	0	0	0	0	0	0	0	0	0	0	0
0	0	0	0	0	0	0	0	0	0	0	0	0	0	0	0	0	0	0	0	0	0	0	0	0	0	0	0	0	0	0	0	0	0	0	0	0	0	0	0	0	0	0	0	0	0	0	0	0	0
0	0	0	0	0	0	0	0	0	0	0	0	0	0	0	0	0	0	0	0	0	0	0	0	0	0	0	0	0	0	0	0	0	0	0	0	0	0	0	0	0	0	0	0	0	0	0	0	0	0
0	0	0	0	0	0	0	0	0	0	0	0	0	0	0	0	0	0	0	0	0	0	0	0	0	0	0	0	0	0	0	0	0	0	0	0	0	0	0	0	0	0	0	0	0	0	0	0	0	0
0	0	0	0	0	0	0	0	0	0	0	0	0	0	0	0	0	0	0	0	0	0	0	0	0	0	0	0	0	0	0	0	0	0	0	0	0	0	0	0	0	0	0	0	0	0	0	0	0	0
0	0	0	0	0	0	0	0	0	0	0	0	0	0	0	0	0	0	0	0	0	0	0	0	0	0	0	0	0	0	0	0	0	0	0	0	0	0	0	0	0	0	0	0	0	0	0	0	0	0
0	0	0	0	0	0	0	0	0	0	0	0	0	0	0	0	0	0	0	0	0	0	0	0	0	0	0	0	0	0	0	0	0	0	0	0	0	0	0	0	0	0	0	0	0	0	0	0	0	0
0	0	0	0	0	0	0	0	0	0	0	0	0	0	0	0	0	0	0	0	0	0	0	0	0	0	0	0	0	0	0	0	0	0	0	0	0	0	0	0	0	0	0	0	0	0	0	0	0	0
0	0	0	0	0	0	0	0	0	0	0	0	0	0	0	0	0	0	0	0	0	0	0	0	0	0	0	0	0	0	0	0	0	0	0	0	0	0	0	0	0	0	0	0	0	0	0	0	0	0
0	0	0	0	0	0	0	0	0	0	0	0	0	0	0	0	0	0	0	0	0	0	0	0	0	0	0	0	0	0	0	0	0	0	0	0	0	0	0	0	0	0	0	0	0	0	0	0	0	0
0	0	0	0	0	0	0	0	0	0	0	0	0	0	0	0	0	0	0	0	0	0	0	0	0	0	0	0	0	0	0	0	0	0	0	0	0	0	0	0	0	0	0	0	0	0	0	0	0	0
0	0	0	0	0	0	0	0	0	0	0	0	0	0	0	0	0	0	0	0	0	0	0	0	0	0	0	0	0	0	0	0	0	0	0	0	0	0	0	0	0	0	0	0	0	0	0	0	0	0
0	0	0	0	0	0	0	0	0	0	0	0	0	0	0	0	0	0	0	0	0	0	0	0	0	0	0	0	-0.0183713	0.0188921	0.061101	0	0	0	0	0	0	0	0	0	0	0	0	0	0	0	0	0	0	0
0	0	0	0	0	0	0	0	0	0	0	0	0	0	0	0	0	0	0	0	0	0	0	0	-0.0036808	0.00528285	-0.0196371	-0.034519	-0.00790372	0.00707672	-0.0149051	-0.0149868	0.0118749	0	0	0.00431724	0.0102291	0.0873748	0	0	0	0	0	0	0	0	0	0	0	0
0	0	0	0	0	0	0	0	0	0	0	0	0	0	0	0	0	0	0	0	-0.0110611	-0.00517883	-0.0102024	-0.00360143	-0.00393835	-0.00623469	-0.0159634	-0.023636	0.00261958	0.021894	-0.0136701	-0.0315535	-0.00182731	-0.0362782	0.00203122	0.0304328	-0.0173136	0.0649466	0.106632	0	0	0	0	0	0	0	0	0	0	0
0	0	0	0	0	0	0	0	0	0	0	0	0	0	0	0	0	0	-0.00643503	-0.00648935	-0.00889742	-0.00690657	-0.00578514	-0.00938738	-0.0149678	-0.0202563	-0.032894	-0.0155152	0.00576923	0.0242026	0.00335404	-0.0211721	-0.00693227	-0.0212517	-0.0354722	0.0355487	-0.0477761	-0.0184235	0.115662	0	0	0	0	0	0	0	0	0	0	0
0	0	0	0	0	0	0	0	0	0	0	0	0	0	0	0	-0.117931	-0.0751457	-0.0401343	0.00741978	-0.00167372	-0.030235	-0.0718338	-0.155071	-0.214621	-0.205931	-0.162156	-0.0572667	-0.0258701	-0.122726	-0.239964	0.0813976	0.307708	-0.0833585	-0.0487183	0.121928	-0.0913382	0.0594605	0.267287	0	0	0	0	0	0	0	0	0	0	0
0	0	0	0	0	0	0	0	0	0	0	0	0	0	0	-0.0323774	-0.0287421	-0.0235898	-0.0175908	-0.0129193	-0.0235261	-0.0289355	-0.027025	-0.0071201	-0.00708889	-0.0260843	-0.0519903	-0.0798213	-0.0755084	-0.0321402	-0.0127262	-0.0170148	-0.0679452	-0.102234	-0.0172295	-0.0110517	-0.0174247	0.121237	0	0	0	0	0	0	0	0	0	0	0	0
0	0	0	0	0	0	0	0	0	0	0	0	0	0	-0.0262974	-0.0281009	-0.0300172	-0.031857	-0.0544245	-0.0681379	-0.0611467	-0.0713005	0.011989	0.0154055	-0.0448881	-0.0449049	-0.0147974	-0.0526584	-0.00133648	-0.0549574	-0.0406299	-0.077145	-0.135275	0.0104334	0.00164224	-0.000234919	-0.0345444	0.0485567	0.104428	0	0	0	0	0	0	0	0	0	0	0
0	0	0	0	0	0	0	0	0	0	0	0	0	-0.0289653	-0.0263833	-0.0321407	-0.037535	-0.0373302	-0.0605456	-0.100103	-0.0785464	-0.00282455	0.0283931	-0.0314248	-0.0369708	-0.0467357	-0.0556261	-0.0798045	-0.0129598	-0.0436836	-0.0758014	-0.140834	-0.0617975	0.0201084	-0.0816949	0.0261302	-0.015061	0.041092	0.0992799	0	0	0	0	0	0	0	0	0	0	0
0	0	0	0	0	0	0	0	0	0	0	0	0	-0.0271271	-0.0252037	-0.0260137	-0.025888	-0.0341795	-0.0326044	-0.041496	-0.0219907	0.000819857	-0.00957919	-0.0410031	-0.0470652	-0.0648794	-0.0751826	-0.104267	-0.0444599	-0.0283698	-0.0193749	-0.0498209	0.00048527	-0.12086	-0.0198981	0.0323677	-0.0135178	0.0224912	0.0872468	0	0	0	0	0	0	0	0	0	0	0
0	0	0	0	0	0	0	0	0	0	0	0	0	-0.0287645	-0.0237177	-0.0288374	-0.0300641	-0.0376675	-0.0291619	-0.0270645	-0.0153529	-0.0316771	-0.0393754	-0.0475064	-0.0510877	-0.0659662	-0.0799948	-0.0937489	-0.0693607	-0.0240217	0.0366899	-0.0100283	-0.108288	-0.062684	0.00861228	-0.00824127	-0.0324839	0.0363515	0	0	0	0	0	0	0	0	0	0	0	0
0	0	0	0	0	0	0	0	0	0	0	0	0	-0.0272307	-0.0256133	-0.0336943	-0.0293627	-0.0291973	-0.0215097	-0.0347911	-0.0468898	-0.0467683	-0.0420741	-0.0545762	-0.0643266	-0.0731815	-0.0823266	-0.0610221	-0.0368911	0.0252805	0.0789018	-0.0996488	-0.0791324	-0.0210161	0.00861288	-0.0409259	-0.0171652	0.0565695	0	0	0	0	0	0	0	0	0	0	0	0
0	0	0	0	0	0	0	0	0	0	0	0	0	-0.0302308	-0.0279028	-0.0281528	-0.0328176	-0.0320971	-0.024275	-0.0319219	-0.0566819	-0.0494134	-0.0594951	-0.0740183	-0.0471204	-0.047302	0.0027577	0.0131792	0.0158149	0.0358792	-0.0494639	-0.0816134	-0.0253197	-0.0414013	-0.0162106	-0.016367	0.00474591	0.0925728	0	0	0	0	0	0	0	0	0	0	0	0
0	0	0	0	0	0	0	0	0	0	0	0	0	-0.0392573	-0.0885422	-0.106154	-0.100669	-0.120697	-0.125463	-0.120404	-0.0401656	0.0825396	0.248347	0.501234	0.66172	0.640492	0.462792	0.245623	0.0790352	0.0281121	0.106088	0.366829	0.406247	0.262878	0.301103	0.411091	0	0	0	0	0	0	0	0	0	0	0	0	0	0
0	0	0	0	0	0	0	0	0	0	0	0	0	0	-0.0328899	-0.0277275	-0.0370843	-0.0566862	-0.0582887	-0.0048558	-0.0367231	-0.0244107	-0.031197	-0.0386085	-0.0256548	-0.0173118	-0.0171326	-0.0164314	-0.0061854	0.00651554	0.000484314	0.0012087	0.00206672	0.0276693	0.0640649	0	0	0	0	0	0	0	0	0	0	0	0	0	0	0
0	0	0	0	0	0	0	0	0	0	0	0	0	0	-0.0352309	-0.0246268	-0.0308012	-0.027963	-0.0375739	-0.0253841	-0.0307729	-0.0310964	-0.0254339	-0.0283705	-0.013459	-0.00604462	0.000189001	0.00150799	0.0181563	0.0258789	0.00746304	0.00536719	0.0138222	0	0	0	0	0	0	0	0	0	0	0	0	0	0	0	0	0
0	0	0	0	0	0	0	0	0	0	0	0	0	0	0	-0.0175741	-0.0193504	-0.0250904	-0.0229468	-0.0335469	-0.0252967	-0.0186375	-0.0154958	-0.0163448	-0.0118524	0.00874383	0.0153145	0.00853225	0.0089073	0.0128719	0	0	0	0	0	0	0	0	0	0	0	0	0	0	0	0	0	0	0	0
0	0	0	0	0	0	0	0	0	0	0	0	0	0	0	0	-0.00893273	-0.0107571	-0.0112249	-0.0199601	-0.0137606	-0.0133788	-0.0190999	-0.0103426	-0.0024875	0.00809276	-0.00238621	-0.0204488	0	0	0	0	0	0	0	0	0	0	0	0	0	0	0	0	0	0	0	0	0	0
0	0	0	0	0	0	0	0	0	0	0	0	0	0	0	0	0	-0.0178623	-0.0140871	-0.0161155	-0.0119792	-0.0146275	-0.019981	-0.0244105	-0.00442189	-0.0187257	-0.0225537	0	0	0	0	0	0	0	0	0	0	0	0	0	0	0	0	0	0	0	0	0	0	0
0	0	0	0	0	0	0	0	0	0	0	0	0	0	0	0	0	0	-0.00919031	0.00204262	-0.0109959	-0.01593	-0.0185731	-0.0176531	-0.00999523	0	0	0	0	0	0	0	0	0	0	0	0	0	0	0	0	0	0	0	0	0	0	0	0	0
0	0	0	0	0	0	0	0	0	0	0	0	0	0	0	0	0	0	0	0	0	0	0	0	0	0	0	0	0	0	0	0	0	0	0	0	0	0	0	0	0	0	0	0	0	0	0	0	0	0
0	0	0	0	0	0	0	0	0	0	0	0	0	0	0	0	0	0	0	0	0	0	0	0	0	0	0	0	0	0	0	0	0	0	0	0	0	0	0	0	0	0	0	0	0	0	0	0	0	0
0	0	0	0	0	0	0	0	0	0	0	0	0	0	0	0	0	0	0	0	0	0	0	0	0	0	0	0	0	0	0	0	0	0	0	0	0	0	0	0	0	0	0	0	0	0	0	0	0	0
0	0	0	0	0	0	0	0	0	0	0	0	0	0	0	0	0	0	0	0	0	0	0	0	0	0	0	0	0	0	0	0	0	0	0	0	0	0	0	0	0	0	0	0	0	0	0	0	0	0
0	0	0	0	0	0	0	0	0	0	0	0	0	0	0	0	0	0	0	0	0	0	0	0	0	0	0	0	0	0	0	0	0	0	0	0	0	0	0	0	0	0	0	0	0	0	0	0	0	0
0	0	0	0	0	0	0	0	0	0	0	0	0	0	0	0	0	0	0	0	0	0	0	0	0	0	0	0	0	0	0	0	0	0	0	0	0	0	0	0	0	0	0	0	0	0	0	0	0	0
0	0	0	0	0	0	0	0	0	0	0	0	0	0	0	0	0	0	0	0	0	0	0	0	0	0	0	0	0	0	0	0	0	0	0	0	0	0	0	0	0	0	0	0	0	0	0	0	0	0
0	0	0	0	0	0	0	0	0	0	0	0	0	0	0	0	0	0	0	0	0	0	0	0	0	0	0	0	0	0	0	0	0	0	0	0	0	0	0	0	0	0	0	0	0	0	0	0	0	0
0	0	0	0	0	0	0	0	0	0	0	0	0	0	0	0	0	0	0	0	0	0	0	0	0	0	0	0	0	0	0	0	0	0	0	0	0	0	0	0	0	0	0	0	0	0	0	0	0	0
0	0	0	0	0	0	0	0	0	0	0	0	0	0	0	0	0	0	0	0	0	0	0	0	0	0	0	0	0	0	0	0	0	0	0	0	0	0	0	0	0	0	0	0	0	0	0	0	0	0
0	0	0	0	0	0	0	0	0	0	0	0	0	0	0	0	0	0	0	0	0	0	0	0	0	0	0	0	0	0	0	0	0	0	0	0	0	0	0	0	0	0	0	0	0	0	0	0	0	0
0	0	0	0	0	0	0	0	0	0	0	0	0	0	0	0	0	0	0	0	0	0	0	0	0	0	0	0	0	0	0	0	0	0	0	0	0	0	0	0	0	0	0	0	0	0	0	0	0	0
0	0	0	0	0	0	0	0	0	0	0	0	0	0	0	0	0	0	0	0	0	0	0	0	0	0	0	0	0	0	0	0	0	0	0	0	0	0	0	0	0	0	0	0	0	0	0	0	0	0
0	0	0	0	0	0	0	0	0	0	0	0	0	0	0	0	0	0	0	0	0	0	0	0	0	0	0	0	0	0	0	0	0	0	0	0	0	0	0	0	0	0	0	0	0	0	0	0	0	0
0	0	0	0	0	0	0	0	0	0	0	0	0	0	0	0	0	0	0	0	0	0	0	0	0	0	0	0	0	0	0	0	0	0	0	0	0	0	0	0	0	0	0	0	0	0	0	0	0	0
0	0	0	0	0	0	0	0	0	0	0	0	0	0	0	0	0	0	0	0	0	0	0	0	0	0	0	0	0	0	0	0	0	0	0	0	0	0	0	0	0	0	0	0	0	0	0	0	0	0
0	0	0	0	0	0	0	0	0	0	0	0	0	0	0	0	0	0	0	0	0	0	0	0	0	0	0	0	0	0	0	0	0	0	0	0	0	0	0	0	0	0	0	0	0	0	0	0	0	0
0	0	0	0	0	0	0	0	0	0	0	0	0	0	0	0	0	0	0	0	0	0	0	0	0	0	0	0	0	0	0	0	0	0	0	0	0	0	0	0	0	0	0	0	0	0	0	0	0	0
0	0	0	0	0	0	0	0	0	0	0	0	0	0	0	0	0	0	0	0	0	0	0	0	0	0	0	0	0	0	0	0	0	0	0	0	0	0	0	0	0	0	0	0	0	0	0	0	0	0
0	0	0	0	0	0	0	0	0	0	0	0	0	0	0	0	0	0	0	0	0	0	0	0	0	0	0	0	0	0	0	0	0	0	0	0	0	0	0	0	0	0	0	0	0	0	0	0	0	0
0	0	0	0	0	0	0	0	0	0	0	0	0	0	0	0	0	0	0	0	0	0	0	0	0	0	0	0	0	0	0	0	0	0	0	0	0	0	0	0	0	0	0	0	0	0	0	0	0	0
0	0	0	0	0	0	0	0	0	0	0	0	0	0	0	0	0	0	0	0	0	0	0	0	0	0	0	0	0	0	0	0	0	0	0	0	0	0	0	0	0	0	0	0	0	0	0	0	0	0
0	0	0	0	0	0	0	0	0	0	0	0	0	0	0	0	0	0	0	0	0	0	0	0	0	0	0	0	0	0	0	0	0	0	0	0	0	0	0	0	0	0	0	0	0	0	0	0	0	0
0	0	0	0	0	0	0	0	0	0	0	0	0	0	0	0	0	0	0	0	0	0	0	0	0	0	0	0	0	0	0	0	0	0	0	0	0	0	0	0	0	0	0	0	0	0	0	0	0	0
0	0	0	0	0	0	0	0	0	0	0	0	0	0	0	0	0	0	0	0	0	0	0	0	0	0	0	0	0	0	0	0	0	0	0	0	0	0	0	0	0	0	0	0	0	0	0	0	0	0
0	0	0	0	0	0	0	0	0	0	0	0	0	0	0	0	0	0	0	0	0	0	0	0	0	0	0	0	0	0	0	0	0	0	0	0	0	0	0	0	0	0	0	0	0	0	0	0	0	0
0	0	0	0	0	0	0	0	0	0	0	0	0	0	0	0	0	0	0	0	0	0	0	0	0	0	0	0	0	0	0	0	0	0	0	0	0	0	0	0	0	0	0	0	0	0	0	0	0	0
0	0	0	0	0	0	0	0	0	0	0	0	0	0	0	0	0	0	0	0	0	0	0	0	0	0	0	0	0	0	0	0	0	0	0	0	0	0	0	0	0	0	0	0	0	0	0	0	0	0
0	0	0	0	0	0	0	0	0	0	0	0	0	0	0	0	0	0	0	0	0	0	0	0	0	0	0	0	0	0	0	0	-0.014499	-0.0114754	-0.00649968	-0.0102579	-0.00720775	-0.0102305	0.00444511	0.00706467	0	0	0	0	0	0	0	0	0	0
0	0	0	0	0	0	0	0	0	0	0	0	0	0	0	0	0	0	0	0	0	0	0	0	0	0	0	0	0	0	-0.0317866	-0.0300049	-0.0164443	-0.0166273	-0.00829923	-0.017659	-0.0170877	-0.0144783	-0.00758764	0.00698682	0.00144337	0	0	0	0	0	0	0	0	0
0	0	0	0	0	0	0	0	0	0	0	0	0	0	0	0	0	0	0	0	0	0	0	0	0	0	0	0	0	-0.0230131	-0.0264137	-0.0227759	-0.0085105	-0.0179734	-0.0102251	-0.0215026	-0.0149026	-0.0105702	-0.0109123	-0.00751281	0.0117041	0.0128345	0.00859151	0	0	0	0	0	0	0
0	0	0	0	0	0	0	0	0	0	0	0	0	0	0	0	0	0	0	0	0	0	0	0	0	0	0	0	-0.0316631	-0.0219795	-0.0301184	-0.0240876	-0.0162408	-0.0281674	-0.0512554	0.0102918	0.0220158	-0.00409703	-0.0101971	-0.0132203	-0.00796701	0.0139443	0.0284896	0.0135385	0	0	0	0	0	0
0	0	0	0	0	0	0	0	0	0	0	0	0	0	0	0	0	0	0	0	0	0	0	0	0	0	0	0	-0.0235223	-0.0203941	-0.0247971	-0.0272512	-0.0143059	-0.0352158	-0.0635434	-0.00487002	0.0123196	-0.00079335	-0.010414	-0.0080804	-0.0116554	0.000332395	0.0186305	0.0340948	0.0225804	0	0	0	0	0
0	0	0	0	0	0	0	0	0	0	0	0	0	0	0	0	0	0	0	0	0	0	0	0	0	0	0	0	-0.0504222	-0.0558963	-0.0635661	-0.0571449	-0.0405217	-0.0205005	0.037056	0.0983296	0.104244	0.0568751	0.0385093	0.0240268	0.0184688	0.0274878	0.0213612	0.00691998	-0.0564595	-0.208198	0	0	0	0
0	0	0	0	0	0	0	0	0	0	0	0	0	0	0	0	0	0	0	0	0	0	0	0	0	0	0	-0.017198	-0.0243756	-0.0202495	-0.0306127	-0.0259855	-0.0181445	-0.029456	-0.0315239	-0.0169522	-0.0182781	-0.00596705	-0.0138649	-0.0210413	-0.0102221	-0.0153376	-0.00780185	0.000609946	0.00901111	0.0158652	0.0276755	0	0	0
0	0	0	0	0	0	0	0	0	0	0	0	0	0	0	0	0	0	0	0	0	0	0	0	0	0	0	-0.00692035	-0.0306577	-0.0198249	-0.0306771	-0.0553326	-0.0543668	-0.0643882	-0.0491269	-0.0292035	-0.0344145	-0.0280844	-0.01863	-0.0181881	-0.0211791	-0.0148237	-0.0138607	-0.0109753	-0.00118781	-0.00857936	0.0118781	0.0216496	0	0
0	0	0	0	0	0	0	0	0	0	0	0	0	0	0	0	0	0	0	0	0	0	0	0	0	0	0	0	-0.0307179	-0.0202877	-0.0390732	-0.0765061	-0.0473162	-0.0659104	-0.042955	-0.0441556	-0.0333797	-0.0234736	-0.0230547	-0.0211146	-0.0263337	-0.00954256	-0.0107658	-0.0110332	-0.00208429	-0.0173642	0.0269199	0.0152001	0	0
0	0	0	0	0	0	0	0	0	0	0	0	0	0	0	0	0	0	0	0	0	0	0	0	0	0	0	0	-0.0250611	-0.0205853	-0.0530344	-0.0451536	-0.0599589	-0.0641526	-0.0302554	-0.0420637	-0.0433201	-0.0553527	-0.0249981	-0.0331418	-0.027259	-0.0148512	-0.00958116	-0.0114604	-0.01001	-0.020335	0.000227006	-0.00139694	0	0
0	0	0	0	0	0	0	0	0	0	0	0	0	0	0	0	0	0	0	0	0	0	0	0	0	0	0	0	-0.0246125	-0.0270258	-0.0424831	-0.0643714	-0.0497119	-0.0533013	-0.0437433	-0.0356051	-0.0481439	-0.054398	-0.0356494	-0.0289956	-0.0286921	-0.00578439	-0.00283381	-0.0114797	-0.0147054	-0.0131067	-0.00235783	-0.002743	0	0
0	0	0	0	0	0	0	0	0	0	0	0	0	0	0	0	0	0	0	0	0	0	0	0	0	0	0	0	-0.0254677	-0.0282023	-0.0429005	-0.0598922	-0.0386857	-0.0434282	-0.0318605	-0.0350591	-0.0457757	-0.0559196	-0.0419339	-0.0222775	-0.0327625	-0.0178924	-0.00322892	-0.00558065	-0.0150617	-0.0103758	-0.0013398	0	0	0
0	0	0	0	0	0	0	0	0	0	0	0	0	0	0	0	0	0	0	0	0	0	0	0	0	0	0	0	-0.0222739	-0.0176752	-0.0313164	-0.0452695	-0.0434999	-0.0481499	-0.0232123	-0.0222012	-0.0424149	-0.0444421	-0.0422337	-0.0341728	-0.0281104	-0.0251099	-0.0181079	-0.00457325	-0.0136315	-0.00917109	0.00176327	0	0	0
0	0	0	0	0	0	0	0	0	0	0	0	0	0	0	0	0	0	0	0	0	0	0	0	0	0	0	-0.0202051	-0.0137681	-0.00571441	-0.0127231	-0.0330438	-0.020965	-0.0276	-0.0450227	-0.0388166	-0.041805	-0.0435116	-0.0377052	-0.0376753	-0.0313585	-0.0283495	-0.0212252	-0.0129124	-0.00180099	0	0	0	0	0
0	0	0	0	0	0	0	0	0	0	0	0	0	0	0	0	0	0	0	0	0	0	0	0	0	0	0	-0.00127259	0.00101052	-0.0111996	0.0113165	0.0369088	0.032677	0.0482514	0.0229871	0.00660309	0.104156	0.209575	0.260725	0.271209	0.234988	0.281399	0	0	0	0	0	0	0	0
0	0	0	0	0	0	0	0	0	0	0	0	0	0	0	0	0	0	0	0	0	0	0	0	0	0	0	0	0	0.0181451	-0.00763454	-0.0200759	-0.0142342	0	0.0199648	-0.00900188	0	0	0	0	0	0	0	0	0	0	0	0	0	0
0	0	0	0	0	0	0	0	0	0	0	0	0	0	0	0	0	0	0	0	0	0	0	0	0	0	0	0	0	0	0	0	0	0	0	0	0	0	0	0	0	0	0	0	0	0	0	0	0	0
0	0	0	0	0	0	0	0	0	0	0	0	0	0	0	0	0	0	0	0	0	0	0	0	0	0	0	0	0	0	0	0	0	0	0	0	0	0	0	0	0	0	0	0	0	0	0	0	0	0
0	0	0	0	0	0	0	0	0	0	0	0	0	0	0	0	0	0	0	0	0	0	0	0	0	0	0	0	0	0	0	0	0	0	0	0	0	0	0	0	0	0	0	0	0	0	0	0	0	0
0	0	0	0	0	0	0	0	0	0	0	0	0	0	0	0	0	0	0	0	0	0	0	0	0	0	0	0	0	0	0	0	0	0	0	0	0	0	0	0	0	0	0	0	0	0	0	0	0	0
0	0	0	0	0	0	0	0	0	0	0	0	0	0	0	0	0	0	0	0	0	0	0	0	0	0	0	0	0	0	0	0	0	0	0	0	0	0	0	0	0	0	0	0	0	0	0	0	0	0
0	0	0	0	0	0	0	0	0	0	0	0	0	0	0	0	0	0	0	0	0	0	0	0	0	0	0	0	0	0	0	0	0	0	0	0	0	0	0	0	0	0	0	0	0	0	0	0	0	0
0	0	0	0	0	0	0	0	0	0	0	0	0	0	0	0	0	0	0	0	0	0	0	0	0	0	0	0	0	0	0	0	0	0	0	0	0	0	0	0	0	0	0	0	0	0	0	0	0	0
0	0	0	0	0	0	0	0	0	0	0	0	0	0	0	0	0	0	0	0	0	0	0	0	0	0	0	0	0	0	0	0	0	0	0	0	0	0	0	0	0	0	0	0	0	0	0	0	0	0
0	0	0	0	0	0	0	0	0	0	0	0	0	0	0	0	0	0	0	0	0	0	0	0	0	0	0	0	0	0	0	0	0	0	0	0	0	0	0	0	0	0	0	0	0	0	0	0	0	0
0	0	0	0	0	0	0	0	0	0	0	0	0	0	0	0	0	0	0	0	0	0	0	0	0	0	0	0	0	0	0	0	0	0	0	0	0	0	0	0	0	0	0	0	0	0	0	0	0	0
0	0	0	0	0	0	0	0	0	0	0	0	0	0	0	0	0	0	0	0	0	0	0	0	0	0	0	0	0	0	0	0	0	0	0	0	0	0	0	0	0	0	0	0	0	0	0	0	0	0
0	0	0	0	0	0	0	0	0	0	0	0	0	0	0	0	0	0	0	0	0	0	0	0	0	0	0	0	0	0	0	0	0	0	0	0	0	0	0	0	0	0	0	0	0	0	0	0	0	0
0	0	0	0	0	0	0	0	0	0	0	0	0	0	0	0	0	0	0	0	0	0	0	0	0	0	0	0	0	0	0	0	0	0	0	0	0	0	0	0	0	0	0	0	0	0	0	0	0	0
0	0	0	0	0	0	0	0	0	0	0	0	0	0	0	0	0	0	0	0	0	0	0	0	0	0	0	0	0	0	0	0	0	0	0	0	0	0	0	0	0	0	0	0	0	0	0	0	0	0
0	0	0	0	0	0	0	0	0	0	0	0	0	0	0	0	0	0	0	0	0	0	0	0	0	0	0	0	0	0	0	0	0	0	0	0	0	0	0	0	0	0	0	0	0	0	0	0	0	0
0	0	0	0	0	0	0	0	0	0	0	0	0	0	0	0	0	0	0	0	0	0	0	0	0	0	0	0	0	0	0	0	0	0	0	0	0	0	0	0	0	0	0	0	0	0	0	0	0	0
0	0	0	0	0	0	0	0	0	0	0	0	0	0	0	0	0	0	0	0	0	0	0	0	0	0	0	0	0	0	0	0	0	0	0	0	0	0	0	0	0	0	0	0	0	0	0	0	0	0
0	0	0	0	0	0	0	0	0	0	0	0	0	0	0	0	0	0	0	0	0	0	0	0	0	0	0	0	0	0	0	0	0	0	0	0	0	0	0	0	0	0	0	0	0	0	0	0	0	0
0	0	0	0	0	0	0	0	0	0	0	0	0	0	0	0	0	0	0	0	0	0	0	0	0	0	0	0	0	0	0	0	0	0	0	0	0	0	0	0	0	0	0	0	0	0	0	0	0	0
0	0	0	0	0	0	0	0	0	0	0	0	0	0	0	0	0	0	0	0	0	0	0	0	0	0	0	0	0	0	0	0	0	0	0	0	0	0	0	0	0	0	0	0	0	0	0	0	0	0
0	0	0	0	0	0	0	0	0	0	0	0	0	0	0	0	0	0	0	0	0	0	0	0	0	0	0	0	0	0	0	0	0	0	0	0	0	0	0	0	0	0	0	0	0	0	0	0	0	0
0	0	0	0	0	0	0	0	0	0	0	0	0	0	0	0	0	0	0	0	0	0	0	0	0	0	0	0	0	0	0	0	0	0	0	0	0	0	0	0	0	0	0	0	0	0	0	0	0	0
0	0	0	0	0	0	0	0	0	0	0	0	0	0	0	0	0	0	0	0	0	0	0	0	0	0	0	0	0	0	0	0	0	0	0	0	0	0	0	0	0	0	0	0	0	0	0	0	0	0
0	0	0	0	0	0	0	0	0	0	0	0	0	0	0	0	0	0	0	0	0	0	0	0	0	0	0	0	0	0	0	0	0	0	0	0	0	0	0	0	0	0	0	0	0	0	0	0	0	0
0	0	0	0	0	0	0	0	0	0	0	0	0	0	0	0	0	0	0	0	0	0	0	0	0	0	0	0	0	0	0	0	0	0	0	0	0	0	0	0	0	0	0	0	0	0	0	0	0	0
0	0	0	0	0	0	0	0	0	0	0	0	0	0	0	0	0	0	0	0	0	0	0	0	0	0	0	0	0	0	0	0	0	0	0	0	0	0	0	0	0	0	0	0	0	0	0	0	0	0
0	0	0	0	0	0	0	0	0	0	0	0	0	0	0	0	0	0	0	0	0	0	0	0	0	0	0	0	0	0	0	0	0	0	0	0	0	0	0	0	0	0	0	0	0	0	0	0	0	0
0	0	0	0	0	0	0	0	0	0	0	0	0	0	0	0	0	0	0	0	0	0	0	0	0	0	0	0	0	0	0	0	0	0	0	0	0	0	0	0	0	0	0	0	0	0	0	0	0	0
0	0	0	0	0	0	0	0	0	0	0	0	0	0	0	0	0	0	0	0	0	0	0	0	0	0	0	0	0	0	0	0	0	0	0	0	0	0	0	0	0	0	0	0	0	0	0	0	0	0
0	0	0	0	0	0	0	0	0	0	0	0	0	0	0	0	0	0	0	0	0	0	0	0	0	0	0	0	0	-0.00267306	-0.00951404	-0.00336657	0.00134296	-0.00699255	0.0212507	0.0357281	0.0480932	0	0	0	0	0	0	0	0	0	0	0	0	0
0	0	0	0	0	0	0	0	0	0	0	0	0	0	0	0	0	0	0	0	0	0	0	0	0	-0.010026	-0.00427326	-0.0123675	-0.0103399	-0.00384943	-0.0104763	-0.0153413	0.00349611	-0.0049747	0.00519621	0.0121341	0.0174532	0.0251405	0.0384592	0.0416572	0	0	0	0	0	0	0	0	0	0
0	0	0	0	0	0	0	0	0	0	0	0	0	0	0	0	0	0	0	0	0	0	0	0	-0.00916344	-0.00957015	-0.0108947	-0.0137766	-0.0177035	-0.014822	-0.021635	-0.0350512	0.0190104	-0.0294953	-0.0365556	0.00941141	0.0155827	0.0108499	0.0186351	0.0244911	0.033597	0.0254524	0	0	0	0	0	0	0	0
0	0	0	0	0	0	0	0	0	0	0	0	0	0	0	0	0	0	0	0	0	0	0	-0.0736169	-0.0290648	-0.0135004	-0.0177182	-0.118037	-0.313556	-0.259808	-0.0534727	-0.0200906	-0.0370844	-0.00175596	0.132001	0.311925	0.433715	0.200855	0.0326767	0.142014	0.166914	0.0360479	-0.00114683	-0.0212214	0	0	0	0	0	0
0	0	0	0	0	0	0	0	0	0	0	0	0	0	0	0	0	0	0	0	0	0	-0.0404513	-0.0103563	-0.00554122	-0.0132216	-0.0529174	-0.0497342	-0.00488108	0.0173058	0.00851492	-0.00331618	0.000733171	-0.00738692	-0.0240736	-0.0393356	-0.0418154	-0.0201086	0.0293165	0.0243869	0.0035998	0.00328534	-0.00137278	-0.0155211	0	0	0	0	0	0
0	0	0	0	0	0	0	0	0	0	0	0	0	0	0	0	0	0	0	0	0	0	-0.0377763	-0.0150191	-0.0169304	-0.0830872	-0.0399244	-0.0220707	-0.021212	0.014924	-0.00357985	-0.00980034	-0.00832375	-0.0137212	-0.02589	-0.0333711	-0.0277781	0.00468019	-0.00602582	8.63006e-05	-0.00382803	-0.00610798	-0.00559047	-0.0119508	0	0	0	0	0	0
0	0	0	0	0	0	0	0	0	0	0	0	0	0	0	0	0	0	0	0	0	-0.0327846	-0.0415392	-0.0198818	-0.0426374	-0.0724275	-0.0080348	-0.0305839	-0.013454	-0.0109388	-0.00946488	-0.035086	-0.0113956	-0.0192082	-0.0271974	-0.0332178	-0.00573676	-0.00864991	-0.0143456	-0.0100558	-0.00806718	-0.00970001	-0.00925935	-0.0184905	0	0	0	0	0	0
0	0	0	0	0	0	0	0	0	0	0	0	0	0	0	0	0	0	0	0	0	0	-0.0261028	-0.0532697	-0.103416	-0.0239948	-0.0382033	-0.0332083	-0.0242002	-0.0165664	0.00209396	-0.0479477	-0.00806152	-0.0251693	-0.0210738	-0.00235613	-0.0101329	-0.0131058	-0.0156984	-0.0126238	-0.0097108	-0.00661236	-0.00804891	-0.0184551	-0.000774238	0	0	0	0	0
0	0	0	0	0	0	0	0	0	0	0	0	0	0	0	0	0	0	0	0	0	0	-0.0235941	-0.0908957	-0.120122	-0.0587073	-0.0236552	-0.0541911	-0.0590338	-0.0238391	-0.00203593	-0.0510042	-0.0135988	-0.0274192	-0.00313435	-0.0183514	-0.0291237	-0.0247801	-0.0236883	-0.014564	-0.0190081	-0.0120195	-0.0106745	-0.0206162	-0.00720658	0	0	0	0	0
0	0	0	0	0	0	0	0	0	0	0	0	0	0	0	0	0	0	0	0	0	0	-0.0336594	-0.11521	-0.0616642	-0.0220782	-0.0234358	-0.0608227	-0.0556302	-0.0158023	0.00902684	-0.0452138	-0.0252061	-0.0298879	-0.00773953	-0.0108199	-0.0295743	-0.027121	-0.0241744	-0.0128895	-0.0149254	-0.0168884	-0.0147946	-0.0211939	-0.0092419	0	0	0	0	0
0	0	0	0	0	0	0	0	0	0	0	0	0	0	0	0	0	0	0	0	0	0	-0.0573203	-0.054457	-0.00539888	-0.00883511	-0.0379979	-0.0746447	-0.0593792	-0.0063772	-0.00421234	-0.0352956	-0.0240608	-0.0414307	-0.0248777	-0.00778147	-0.0282211	-0.0211009	-0.0179294	-0.0125314	-0.0132157	-0.0121436	-0.0221379	-0.0164796	-0.00573008	0	0	0	0	0
0	0	0	0	0	0	0	0	0	0	0	0	0	0	0	0	0	0	0	0	0	0	0	-0.0338333	0.0178044	-0.00168726	-0.0669394	-0.118115	-0.0232808	0.121133	0.0812082	-0.00479534	-0.00232219	-0.0324129	-0.0259826	-0.0331214	-0.093498	-0.114744	-0.0787395	-0.0240232	-0.00994692	-0.00631161	-0.00704532	-0.00902863	0.061641	0	0	0	0	0
0	0	0	0	0	0	0	0	0	0	0	0	0	0	0	0	0	0	0	0	0	0	0	-0.012786	-0.0144834	-0.0290433	-0.0650025	-0.0799792	-0.0177644	-0.0202078	-5.9699e-05	-0.0202662	-0.034594	-0.0483626	-0.0290608	-0.0193439	-0.00583375	0.00678739	0.00397071	-0.00783589	-0.0144061	-0.019964	-0.0247688	-0.0187186	0	0	0	0	0	0
0	0	0	0	0	0	0	0	0	0	0	0	0	0	0	0	0	0	0	0	0	0	0	-0.0125407	-0.0170512	-0.0467992	-0.0609446	-0.0654386	-0.0327403	-0.0135748	-0.0040902	-0.0244569	-0.0384669	-0.0624321	-0.0380243	-0.0214627	-0.0101427	0.00775356	0.0137802	-0.00531645	-0.0190441	-0.017902	-0.0210118	-0.00988846	0	0	0	0	0	0
0	0	0	0	0	0	0	0	0	0	0	0	0	0	0	0	0	0	0	0	0	0	0	-0.0134137	-0.0164637	-0.0459442	-0.0695473	-0.0556159	-0.0301328	-0.0105411	-0.0122895	-0.0302918	-0.040684	-0.0581637	-0.0224498	-0.0205824	0.00349326	0.0203809	0.00900591	-0.0137809	-0.0290378	-0.0273076	-0.0212446	0	0	0	0	0	0	0
0	0	0	0	0	0	0	0	0	0	0	0	0	0	0	0	0	0	0	0	0	0	0	-0.0307044	-0.00858931	-0.0327908	-0.0632309	-0.0488158	-0.00914138	0.0181264	-0.00546034	-0.0321041	-0.0472187	-0.0495001	-0.0165788	-0.015556	0.017707	0.0236661	0.00262682	-0.0134235	-0.0188879	-0.0224086	-0.00395213	0	0	0	0	0	0	0
0	0	0	0	0	0	0	0	0	0	0	0	0	0	0	0	0	0	0	0	0	0	0	-0.0415751	0.000756088	-0.00858266	-0.0427788	-0.0443755	0.00295273	0.0194912	0.00996833	-0.0361298	-0.0456838	-0.0375049	-0.0150454	-0.0124869	0.0317634	0.0251381	-0.00714088	-0.014169	-0.00644543	-0.00733803	0	0	0	0	0	0	0	0
0	0	0	0	0	0	0	0	0	0	0	0	0	0	0	0	0	0	0	0	0	0	0	0	-0.0538985	-0.0119814	-0.00452422	-0.0108634	0.00677273	0.0320642	0.0224577	-0.0223445	-0.0274009	-0.0173621	-0.00587115	0.0268428	0.0404624	0.0138392	0.00332747	-0.000444539	0.00496584	0	0	0	0	0	0	0	0	0
0	0	0	0	0	0	0	0	0	0	0	0	0	0	0	0	0	0	0	0	0	0	0	0	0	-0.0197954	-0.0117184	-0.0155799	0.0101499	0.0133548	-0.00263076	-0.00689799	0.0311162	0.00369418	-0.00340709	0.0253583	0.0620107	0.00636975	0.00334042	-0.00366893	0	0	0	0	0	0	0	0	0	0
0	0	0	0	0	0	0	0	0	0	0	0	0	0	0	0	0	0	0	0	0	0	0	0	0	0	0	0	0	0.0350267	-0.0435436	-0.0606428	0.00710531	-0.00529958	0.00398349	0.0656309	0	0	0	0	0	0	0	0	0	0	0	0	0	0
0	0	0	0	0	0	0	0	0	0	0	0	0	0	0	0	0	0	0	0	0	0	0	0	0	0	0	0	0	0	0	0	0	0	0	0	0	0	0	0	0	0	0	0	0	0	0	0	0	0
0	0	0	0	0	0	0	0	0	0	0	0	0	0	0	0	0	0	0	0	0	0	0	0	0	0	0	0	0	0	0	0	0	0	0	0	0	0	0	0	0	0	0	0	0	0	0	0	0	0
0	0	0	0	0	0	0	0	0	0	0	0	0	0	0	0	0	0	0	0	0	0	0	0	0	0	0	0	0	0	0	0	0	0	0	0	0	0	0	0	0	0	0	0	0	0	0	0	0	0
0	0	0	0	0	0	0	0	0	0	0	0	0	0	0	0	0	0	0	0	0	0	0	0	0	0	0	0	0	0	0	0	0	0	0	0	0	0	0	0	0	0	0	0	0	0	0	0	0	0
0	0	0	0	0	0	0	0	0	0	0	0	0	0	0	0	0	0	0	0	0	0	0	0	0	0	0	0	0	0	0	0	0	0	0	0	0	0	0	0	0	0	0	0	0	0	0	0	0	0
0	0	0	0	0	0	0	0	0	0	0	0	0	0	0	0	0	0	0	0	0	0	0	0	0	0	0	0	0	0	0	0	0	0	0	0	0	0	0	0	0	0	0	0	0	0	0	0	0	0
0	0	0	0	0	0	0	0	0	0	0	0	0	0	0	0	0	0	0	0	0	0	0	0	0	0	0	0	0	0	0	0	0	0	0	0	0	0	0	0	0	0	0	0	0	0	0	0	0	0
0	0	0	0	0	0	0	0	0	0	0	0	0	0	0	0	0	0	0	0	0	0	0	0	0	0	0	0	0	0	0	0	0	0	0	0	0	0	0	0	0	0	0	0	0	0	0	0	0	0
0	0	0	0	0	0	0	0	0	0	0	0	0	0	0	0	0	0	0	0	0	0	0	0	0	0	0	0	0	0	0	0	0	0	0	0	0	0	0	0	0	0	0	0	0	0	0	0	0	0
0	0	0	0	0	0	0	0	0	0	0	0	0	0	0	0	0	0	0	0	0	0	0	0	0	0	0	0	0	0	0	0	0	0	0	0	0	0	0	0	0	0	0	0	0	0	0	0	0	0
0	0	0	0	0	0	0	0	0	0	0	0	0	0	0	0	0	0	0	0	0	0	0	0	0	0	0	0	0	0	0	0	0	0	0	0	0	0	0	0	0	0	0	0	0	0	0	0	0	0
0	0	0	0	0	0	0	0	0	0	0	0	0	0	0	0	0	0	0	0	0	0	0	0	0	0	0	0	0	0	0	0	0	0	0	0	0	0	0	0	0	0	0	0	0	0	0	0	0	0
0	0	0	0	0	0	0	0	0	0	0	0	0	0	0	0	0	0	0	0	0	0	0	0	0	0	0	0	0	0	0	0	0	0	0	0	0	0	0	0	0	0	0	0	0	0	0	0	0	0
0	0	0	0	0	0	0	0	0	0	0	0	0	0	0	0	0	0	0	0	0	0	0	0	0	0	0	0	0	0	0	0	0	0	0	0	0	0	0	0	0	0	0	0	0	0	0	0	0	0
0	0	0	0	0	0	0	0	0	0	0	0	0	0	0	0	0	0	0	0	0	0	0	0	0	0	0	0	0	0	0	0	0	0	0	0	0	0	0	0	0	0	0	0	0	0	0	0	0	0
0	0	0	0	0	0	0	0	0	0	0	0	0	0	0	0	0	0	0	0	0	0	0	0	0	0	0	0	0	0	0	0	0	0	0	0	0	0	0	0	0	0	0	0	0	0	0	0	0	0
0	0	0	0	0	0	0	0	0	0	0	0	0	0	0	0	0	0	0	0	0	0	0	0	0	0	0	0	0	0	0	0	0	0	0	0	0	0	0	0	0	0	0	0	0	0	0	0	0	0
0	0	0	0	0	0	0	0	0	0	0	0	0	0	0	0	0	0	0	0	0	0	0	0	0	0	0	0	0	0	0	0	0	0	0	0	0	0	0	0	0	0	0	0	0	0	0	0	0	0
0	0	0	0	0	0	0	0	0	0	0	0	0	0	0	0	0	0	0	0	0	0	0	0	0	0	0	0	0	0	0	0	0	0	0	0	0	0	0	0	0	0	0	0	0	0	0	0	0	0
0	0	0	0	0	0	0	0	0	0	0	0	0	0	0	0	0	0	0	0	0	0	0	0	0	0	0	0	0	0	0	0	0	0	0	0	0	0	0	0	0	0	0	0	0	0	0	0	0	0
0	0	0	0	0	0	0	0	0	0	0	0	0	0	0	0	0	0	0	0	0	0	0	0	0	0	0	0	0	0	0	0	0	0	0	0	0	0	0	0	0	0	0	0	0	0	0	0	0	0
0	0	0	0	0	0	0	0	0	0	0	0	0	0	0	0	0	0	0	0	0	0	0	0	0	0	0	0	0	0	0	0	0	0	0	0	0	0	0	0	0	0	0	0	0	0	0	0	0	0
0	0	0	0	0	0	0	0	0	0	0	0	0	0	0	0	0	0	0	0	0	0	0	0	0	0	0	0	0	0	0	0	0	0	0	0	0	0	0	0	0	0	0	0	0	0	0	0	0	0
0	0	0	0	0	0	0	0	0	0	0	0	0	0	0	0	0	0	0	0	0	0	0	0	0	0	0	0	0	0	0	0	0	0	0	0	0	0	0	0	0	0	0	0	0	0	0	0	0	0
0	0	0	0	0	0	0	0	0	0	0	0	0	0	0	0	0	0	0	0	0	0	0	0	0	0	0	0	0	0	0	0	0	0	0	0	0	0	0	0	0	0	0	0	0	0	0	0	0	0
0	0	0	0	0	0	0	0	0	0	0	0	0	0	0	0	0	0	0	0	0	0	0	0	0	0	0	0	0	0	0	0	0	0	0	0	0	0	0	0	0	0	0	0	0	0	0	0	0	0
0	0	0	0	0	0	0	0	0	0	0	0	0	0	0	0	0	0	0	0	0	0	0	0	0	0	0	0	0	0	0	0	0	0	0	0	0	0	0	0	0	0	0	0	0	0	0	0	0	0
0	0	0	0	0	0	0	0	0	0	0	0	0	0	0	0	0	0	0	0	0	0	0	0	0	0	0	0	0	0	0	0	0	0	0	0	0	0	0	0	0	0	0	0	0	0	0	0	0	0
0	0	0	0	0	0	0	0	0	0	0	0	0	0	0	0	0	0	0	0	0	0	0.00478872	0.0114967	0.133637	0	0	0	0	0	0	0	0	0	0	0	0	0	0	0	0	0	0	0	0	0	0	0	0	0
0	0	0	0	0	0	0	0	0	0	0	0	0	0	0	0	0	0	0	0	0	-0.0377681	-0.0300674	-0.0180018	0.0497019	0.0473607	0.0135932	0.041058	0	0	0	0	0	0	0	0	0	0	0	0	0	0	0	0	0	0	0	0	0	0
0	0	0	0	0	0	0	0	0	0	0	0	0	0	0	0	0	0	0	0	0	-0.039424	-0.0187892	0.00375784	0.031127	0.0275516	0.027653	0.0185379	0.00432867	0.0282568	0	0	0	0	0	0	0	0	0	0	0	0	0	0	0	0	0	0	0	0
0	0	0	0	0	0	0	0	0	0	0	0	0	0	0	0	0	0	0	0	-0.0866469	-0.0378866	-0.0214729	-0.0164684	-0.0107938	-0.0459948	0.0395438	0.0450194	0.0140811	0.0619901	0.0390788	0.0364847	0.03266	0	0	0	0	0	0	0	0	0	0	0	0	0	0	0	0	0
0	0	0	0	0	0	0	0	0	0	0	0	0	0	0	0	0	0	0	-0.0276022	-0.0371252	-0.0566125	-0.0567949	-0.0301836	-0.036669	-0.0349748	0.00740491	0.032519	-0.00503708	0.0244058	0.0386546	0.0450433	0.0270392	0.0278018	0.0510696	0	0	0	0	0	0	0	0	0	0	0	0	0	0	0
0	0	0	0	0	0	0	0	0	0	0	0	0	0	0	0	0	0	0.0252611	-0.0189465	-0.0234276	-0.0501644	-0.0467328	-0.0353187	-0.0391052	-0.0184215	0.00455492	0.0260602	-0.0200986	-0.00550906	0.0436885	0.0710137	0.0312306	0.0280983	0.0453237	0.0572346	0	0	0	0	0	0	0	0	0	0	0	0	0	0
0	0	0	0	0	0	0	0	0	0	0	0	0	0	0	0	0	-0.0508836	0.0434524	-0.041391	-0.00528941	-0.036326	-0.0498054	-0.0421138	-0.033832	-0.0219304	-0.00950213	0.0330662	0.00882506	0.000277714	0.0224169	0.0427321	0.0437489	0.0376058	0.0403907	0.0488139	0	0	0	0	0	0	0	0	0	0	0	0	0	0
0	0	0	0	0	0	0	0	0	0	0	0	0	0	0	0	0	-0.0285196	0.00208995	-0.0147322	0.00674315	0.013675	-0.00314203	-0.0238787	-0.0282486	0.0105371	0.0309489	0.0445784	0.0278582	0.0357217	0.019764	0.027073	0.0229758	0.0655098	0.04553	0.0379023	0.0415083	0	0	0	0	0	0	0	0	0	0	0	0	0
0	0	0	0	0	0	0	0	0	0	0	0	0	0	0	0	-0.0591037	-0.00575263	0.0199585	-0.0286268	0.000347315	0.0308258	0.00920034	0.00745509	0.0195061	0.0303205	0.0361624	0.0266797	0.0419597	0.0581246	0.0315225	0.00630926	0.0221584	0.0526794	0.0526772	0.0410827	0.028264	0.0309002	0	0	0	0	0	0	0	0	0	0	0	0
0	0	0	0	0	0	0	0	0	0	0	0	0	0	0	0	-0.0798284	-0.00385843	0.0223052	-0.0113465	-0.00500851	-0.00118536	0.030608	0.0332594	0.0151168	0.0140698	0.028302	0.0348212	0.0478437	0.0606042	0.0323627	0.0198931	0.0390181	0.0352459	0.0509197	0.0380255	0.0249256	0.0215295	0	0	0	0	0	0	0	0	0	0	0	0
0	0	0	0	0	0	0	0	0	0	0	0	0	0	0	0	0.134746	0.213157	0.022854	0.0255476	0.419425	0.57804	0.409005	0.200218	0.18482	0.205507	0.280014	0.329343	0.183222	0.116118	0.0746932	0.071747	0.0904527	0.138461	0.201585	0.188246	0.12732	0.0650023	0.00931998	0	0	0	0	0	0	0	0	0	0	0
0	0	0	0	0	0	0	0	0	0	0	0	0	0	0	0	0	-0.0230629	0.0141233	0.0202343	0.0181458	0.0199998	0.00790552	0.0186242	0.0434551	0.0187301	0.0250009	0.0128194	0.0190707	0.0312645	0.0313595	0.0153144	0.022874	0.0142555	0.0180515	0.010147	-0.0051299	-0.00514737	-0.0108977	0	0	0	0	0	0	0	0	0	0	0
0	0	0	0	0	0	0	0	0	0	0	0	0	0	0	0	0	-0.030911	0.00859084	0.0126299	0.0152414	0.0332109	0.0322345	0.0215089	0.0273456	0.00790104	0.0148053	0.0299152	0.0182913	0.0280584	0.0269941	0.00806889	0.0115722	0.0125431	0.0196458	0.00437984	-0.00593006	-0.00463109	-0.0122189	0	0	0	0	0	0	0	0	0	0	0
0	0	0	0	0	0	0	0	0	0	0	0	0	0	0	0	0	-0.0327595	-0.000634915	0.0253059	0.0359181	0.0196343	0.0210241	0.0258276	0.0163513	0.00762459	0.00709519	0.016951	0.0137376	0.0205305	0.0123097	0.000318939	0.0035083	0.0109295	0.0129607	0.00547803	-0.00307311	-0.0122869	-0.0141325	0	0	0	0	0	0	0	0	0	0	0
0	0	0	0	0	0	0	0	0	0	0	0	0	0	0	0	0	-0.0352569	-1.62889e-05	0.030147	0.0283175	0.0101867	0.0045743	0.0147534	0.0249176	0.0122481	-0.00117414	-0.00222758	0.0159843	0.015001	0.00269897	-0.00183132	0.0043021	0.0026235	0.00551942	0.00678221	-0.0123478	-0.017013	-0.0154113	0	0	0	0	0	0	0	0	0	0	0
0	0	0	0	0	0	0	0	0	0	0	0	0	0	0	0	0	0	0.000600271	0.0248644	0.031069	0.00875771	0.0058017	0.00577283	0.0129243	0.0017862	-0.00452677	-0.017004	-0.0012898	0.00326111	-0.00668541	-0.0144672	0.0116712	-0.0117288	-0.0003468	0.00470212	-0.00866971	-0.0169214	0	0	0	0	0	0	0	0	0	0	0	0
0	0	0	0	0	0	0	0	0	0	0	0	0	0	0	0	0	0	-0.00892638	0.00715623	0.0150303	0.019178	0.0115188	-0.00202844	-0.00174815	0.000143208	-0.00574644	-0.0231488	-0.0115155	-0.0110783	-0.011299	-0.0172579	-0.0139005	-0.0083794	-0.00837651	-0.00725176	0.00325431	-0.00960673	0	0	0	0	0	0	0	0	0	0	0	0
0	0	0	0	0	0	0	0	0	0	0	0	0	0	0	0	0	0	0	0	0	0	0.00684588	-0.00610399	-0.00798622	-0.00942752	-0.00696117	-0.019591	-0.0236106	-0.0174854	-0.0262567	-0.0109571	0	0	0	0	0	0	0	0	0	0	0	0	0	0	0	0	0	0
0	0	0	0	0	0	0	0	0	0	0	0	0	0	0	0	0	0	0	0	0	0	0	0	-0.031139	-0.0340613	-0.0285614	-0.0337627	-0.0318597	-0.0242259	0	0	0	0	0	0	0	0	0	0	0	0	0	0	0	0	0	0	0	0
0	0	0	0	0	0	0	0	0	0	0	0	0	0	0	0	0	0	0	0	0	0	0	0	0	0	0	0	0	0	0	0	0	0	0	0	0	0	0	0	0	0	0	0	0	0	0	0	0	0
0	0	0	0	0	0	0	0	0	0	0	0	0	0	0	0	0	0	0	0	0	0	0	0	0	0	0	0	0	0	0	0	0	0	0	0	0	0	0	0	0	0	0	0	0	0	0	0	0	0
0	0	0	0	0	0	0	0	0	0	0	0	0	0	0	0	0	0	0	0	0	0	0	0	0	0	0	0	0	0	0	0	0	0	0	0	0	0	0	0	0	0	0	0	0	0	0	0	0	0
0	0	0	0	0	0	0	0	0	0	0	0	0	0	0	0	0	0	0	0	0	0	0	0	0	0	0	0	0	0	0	0	0	0	0	0	0	0	0	0	0	0	0	0	0	0	0	0	0	0
0	0	0	0	0	0	0	0	0	0	0	0	0	0	0	0	0	0	0	0	0	0	0	0	0	0	0	0	0	0	0	0	0	0	0	0	0	0	0	0	0	0	0	0	0	0	0	0	0	0
0	0	0	0	0	0	0	0	0	0	0	0	0	0	0	0	0	0	0	0	0	0	0	0	0	0	0	0	0	0	0	0	0	0	0	0	0	0	0	0	0	0	0	0	0	0	0	0	0	0
0	0	0	0	0	0	0	0	0	0	0	0	0	0	0	0	0	0	0	0	0	0	0	0	0	0	0	0	0	0	0	0	0	0	0	0	0	0	0	0	0	0	0	0	0	0	0	0	0	0
0	0	0	0	0	0	0	0	0	0	0	0	0	0	0	0	0	0	0	0	0	0	0	0	0	0	0	0	0	0	0	0	0	0	0	0	0	0	0	0	0	0	0	0	0	0	0	0	0	0
0	0	0	0	0	0	0	0	0	0	0	0	0	0	0	0	0	0	0	0	0	0	0	0	0	0	0	0	0	0	0	0	0	0	0	0	0	0	0	0	0	0	0	0	0	0	0	0	0	0
0	0	0	0	0	0	0	0	0	0	0	0	0	0	0	0	0	0	0	0	0	0	0	0	0	0	0	0	0	0	0	0	0	0	0	0	0	0	0	0	0	0	0	0	0	0	0	0	0	0
0	0	0	0	0	0	0	0	0	0	0	0	0	0	0	0	0	0	0	0	0	0	0	0	0	0	0	0	0	0	0	0	0	0	0	0	0	0	0	0	0	0	0	0	0	0	0	0	0	0
0	0	0	0	0	0	0	0	0	0	0	0	0	0	0	0	0	0	0	0	0	0	0	0	0	0	0	0	0	0	0	0	0	0	0	0	0	0	0	0	0	0	0	0	0	0	0	0	0	0
0	0	0	0	0	0	0	0	0	0	0	0	0	0	0	0	0	0	0	0	0	0	0	0	0	0	0	0	0	0	0	0	0	0	0	0	0	0	0	0	0	0	0	0	0	0	0	0	0	0
0	0	0	0	0	0	0	0	0	0	0	0	0	0	0	0	0	0	0	0	0	0	0	0	0	0	0	0	0	0	0	0	0	0	0	0	0	0	0	0	0	0	0	0	0	0	0	0	0	0
0	0	0	0	0	0	0	0	0	0	0	0	0	0	0	0	0	0	0	0	0	0	0	0	0	0	0	0	0	0	0	0	0	0	0	0	0	0	0	0	0	0	0	0	0	0	0	0	0	0
0	0	0	0	0	0	0	0	0	0	0	0	0	0	0	0	0	0	0	0	0	0	0	0	0	0	0	0	0	0	0	0	0	0	0	0	0	0	0	0	0	0	0	0	0	0	0	0	0	0
0	0	0	0	0	0	0	0	0	0	0	0	0	0	0	0	0	0	0	0	0	0	0	0	0	0	0	0	0	0	0	0	0	0	0	0	0	0	0	0	0	0	0	0	0	0	0	0	0	0
0	0	0	0	0	0	0	0	0	0	0	0	0	0	0	0	0	0	0	0	0	0	0	0	0	0	0	0	0	0	0.0252453	0.0195344	-0.000422698	-0.0159087	-0.00793385	-0.0112802	-0.013278	0	0	0	0	0	0	0	0	0	0	0	0	0
0	0	0	0	0	0	0	0	0	0	0	0	0	0	0	0	0	0	0	0	0	0	0	0	0	0.0178581	-0.0242967	-0.065636	-0.0355885	-0.0113599	0.00658501	0.0202944	0.000483828	-0.00525463	-0.00784418	-0.0110404	-0.0220841	-0.018165	-0.0158391	0	0	0	0	0	0	0	0	0	0	0
0	0	0	0	0	0	0	0	0	0	0	0	0	0	0	0	0	0	0	0	0	0	0	0	0.00865802	0.0373933	-0.023872	-0.120171	-0.0671489	-0.0468913	0.00319706	-0.0451781	6.09425e-05	0.0175609	0.0134001	-0.0222853	-0.0324872	-0.0285907	-0.0213562	-0.0195409	0	0	0	0	0	0	0	0	0	0
0	0	0	0	0	0	0	0	0	0	0	0	0	0	0	0	0	0	0	0	0	0	0	-0.00754537	-0.0069987	0.0262424	-0.01579	-0.0376652	-0.0575162	-0.0160559	-0.0154963	-0.0304299	-0.0941769	-0.0612555	-0.00374324	0.0258481	-0.00619057	-0.0302083	-0.0250686	-0.0237181	-0.0219867	0	0	0	0	0	0	0	0	0
0	0	0	0	0	0	0	0	0	0	0	0	0	0	0	0	0	0	0	0	0	0	0	-0.00886811	0.00631021	0.0180574	-0.0342942	0.0044569	-0.0236874	-0.0199777	-0.0241775	-0.0405172	-0.043863	-0.0891775	-0.0332417	-0.00479247	0.0144233	-0.0169304	-0.0305033	-0.0270159	-0.0267604	-0.0186621	-0.0131432	0	0	0	0	0	0	0
0	0	0	0	0	0	0	0	0	0	0	0	0	0	0	0	0	0	0	0	0	0	0	-0.0445697	0.0209496	0.0167453	-0.0604549	-0.0126881	0.00458315	0.0226088	-0.00561938	-0.0360974	-0.0360644	-0.0493052	-0.0465505	-0.0407558	-0.0654768	-0.0187677	-0.00235264	-0.0239927	-0.0284576	-0.0258579	-0.0213597	-0.0180344	0	0	0	0	0	0
0	0	0	0	0	0	0	0	0	0	0	0	0	0	0	0	0	0	0	0	0	0	0	-0.0264452	-0.0807683	0.000127508	-0.0590352	-0.0112613	-0.0322612	-0.0024228	-0.0102981	-0.0238412	-0.0172489	-0.063706	-0.0502572	-0.00344221	-0.0508064	-0.0653429	-0.0498798	-0.043657	-0.0315922	-0.0176406	-0.0200679	-0.0225975	-0.0140022	0	0	0	0	0
0	0	0	0	0	0	0	0	0	0	0	0	0	0	0	0	0	0	0	0	0	0	0	-0.029844	-0.102985	0.027582	-0.0329104	-0.0404235	-0.0867245	0.0620012	-0.0289946	-0.0274209	-0.0173683	-0.0586189	-0.0525072	-0.0114966	-0.0598087	-0.065362	-0.053016	-0.0436901	-0.0414687	-0.025354	-0.0159631	-0.0195233	-0.0134443	-0.011163	0	0	0	0
0	0	0	0	0	0	0	0	0	0	0	0	0	0	0	0	0	0	0	0	0	0	0	0	-0.104215	0.0563496	-0.0140552	-0.107311	-0.0545437	0.0663486	-0.0261536	-0.0295455	-0.00184023	-0.0474326	-0.0503398	-0.018722	-0.0515047	-0.0632497	-0.0469202	-0.0467734	-0.0378987	-0.0309178	-0.0103269	-0.0111687	-0.0182003	-0.0129336	0	0	0	0
0	0	0	0	0	0	0	0	0	0	0	0	0	0	0	0	0	0	0	0	0	0	0	0	-0.114638	0.0451052	0.00630085	-0.144646	0.0495455	0.00548236	-0.0200043	-0.0338692	0.0166536	-0.0232708	-0.0592605	-0.0182859	-0.0443416	-0.0583691	-0.0523078	-0.0487658	-0.0412056	-0.0262696	-0.0218338	-0.000944137	0.00128734	-0.0078559	0	0	0	0
0	0	0	0	0	0	0	0	0	0	0	0	0	0	0	0	0	0	0	0	0	0	0	0	-0.0960309	0.0173388	-0.0439271	0.00709639	0.0070125	-0.00973837	-0.0122643	-0.0183267	-0.0132055	0.00840955	-0.0312247	-0.0311738	-0.0407673	-0.0658804	-0.0661088	-0.0586782	-0.0481112	-0.0279974	-0.0159808	0.00177876	0.000899112	0.0104123	0	0	0	0
0	0	0	0	0	0	0	0	0	0	0	0	0	0	0	0	0	0	0	0	0	0	0	0	-0.0274753	-0.00315363	-0.0134741	0.00114618	-0.0391813	-0.0369401	-0.0014054	0.0201384	-0.0234023	0.0258177	-0.0133032	-0.0355084	-0.0236418	-0.0579086	-0.0604191	-0.0577242	-0.0463076	-0.0278389	-0.00783614	0.0136279	0.00724982	0.0154617	0	0	0	0
0	0	0	0	0	0	0	0	0	0	0	0	0	0	0	0	0	0	0	0	0	0	0	0	0	0.0011396	-0.00206148	-0.0679729	-0.0820537	-0.0259114	-0.0590407	0.00925946	-0.00192961	0.0411742	-0.0061753	-0.0330556	-0.0169947	-0.0584792	-0.0557521	-0.0615435	-0.0512792	-0.0309364	-0.00158853	0.0279384	0.0208002	0.023583	0	0	0	0
0	0	0	0	0	0	0	0	0	0	0	0	0	0	0	0	0	0	0	0	0	0	0	0	0	0	-0.0543242	-0.0736966	-0.023322	-0.048704	-0.0523526	-0.038606	-0.0374669	0.045654	-0.00194778	-0.0123485	-0.0383294	-0.0557146	-0.0533153	-0.0502619	-0.034457	-0.0169562	0.0142676	0.0218537	0	0	0	0	0	0
0	0	0	0	0	0	0	0	0	0	0	0	0	0	0	0	0	0	0	0	0	0	0	0	0	0	0	-0.0394909	-0.0374271	-0.0364311	-0.0866324	-0.13198	-0.121945	-0.134737	-0.129072	-0.122852	-0.070272	-0.0722009	-0.0400705	0.0136033	0.0651186	0.107383	0.102546	0	0	0	0	0	0	0
0	0	0	0	0	0	0	0	0	0	0	0	0	0	0	0	0	0	0	0	0	0	0	0	0	0	0	-0.0343364	-0.0303345	-0.04235	-0.0582314	-0.0563163	-0.0338544	-0.040451	-0.0309198	-0.0282133	-0.0315496	-0.0149515	0.00447158	0.0105853	0.0191775	0.0178232	0	0	0	0	0	0	0	0
0	0	0	0	0	0	0	0	0	0	0	0	0	0	0	0	0	0	0	0	0	0	0	0	0	0	0	0	-0.0534754	-0.0592485	-0.0484263	-0.057772	-0.040474	-0.027206	-0.0202382	-0.0174031	-0.00996829	0.00434106	0.0218784	0.0143619	0.010068	0	0	0	0	0	0	0	0	0
0	0	0	0	0	0	0	0	0	0	0	0	0	0	0	0	0	0	0	0	0	0	0	0	0	0	0	0	0	-0.0578993	-0.0573983	-0.0402076	-0.0339996	-0.0293641	-0.0218754	-0.0105449	0.00817115	0.0124358	0.0191717	0.0153815	0	0	0	0	0	0	0	0	0	0
0	0	0	0	0	0	0	0	0	0	0	0	0	0	0	0	0	0	0	0	0	0	0	0	0	0	0	0	0	0	-0.0563013	-0.0562599	-0.0283188	-0.0359585	-0.0230937	-0.00771523	0.0093216	0.0138824	0	0	0	0	0	0	0	0	0	0	0	0
0	0	0	0	0	0	0	0	0	0	0	0	0	0	0	0	0	0	0	0	0	0	0	0	0	0	0	0	0	0	0	0	0	0	0	0	0	0	0	0	0	0	0	0	0	0	0	0	0	0
0	0	0	0	0	0	0	0	0	0	0	0	0	0	0	0	0	0	0	0	0	0	0	0	0	0	0	0	0	0	0	0	0	0	0	0	0	0	0	0	0	0	0	0	0	0	0	0	0	0
0	0	0	0	0	0	0	0	0	0	0	0	0	0	0	0	0	0	0	0	0	0	0	0	0	0	0	0	0	0	0	0	0	0	0	0	0	0	0	0	0	0	0	0	0	0	0	0	0	0
0	0	0	0	0	0	0	0	0	0	0	0	0	0	0	0	0	0	0	0	0	0	0	0	0	0	0	0	0	0	0	0	0	0	0	0	0	0	0	0	0	0	0	0	0	0	0	0	0	0
0	0	0	0	0	0	0	0	0	0	0	0	0	0	0	0	0	0	0	0	0	0	0	0	0	0	0	0	0	0	0	0	0	0	0	0	0	0	0	0	0	0	0	0	0	0	0	0	0	0
0	0	0	0	0	0	0	0	0	0	0	0	0	0	0	0	0	0	0	0	0	0	0	0	0	0	0	0	0	0	0	0	0	0	0	0	0	0	0	0	0	0	0	0	0	0	0	0	0	0
0	0	0	0	0	0	0	0	0	0	0	0	0	0	0	0	0	0	0	0	0	0	0	0	0	0	0	0	0	0	0	0	0	0	0	0	0	0	0	0	0	0	0	0	0	0	0	0	0	0
0	0	0	0	0	0	0	0	0	0	0	0	0	0	0	0	0	0	0	0	0	0	0	0	0	0	0	0	0	0	0	0	0	0	0	0	0	0	0	0	0	0	0	0	0	0	0	0	0	0
0	0	0	0	0	0	0	0	0	0	0	0	0	0	0	0	0	0	0	0	0	0	0	0	0	0	0	0	0	0	0	0	0	0	0	0	0	0	0	0	0	0	0	0	0	0	0	0	0	0
0	0	0	0	0	0	0	0	0	0	0	0	0	0	0	0	0	0	0	0	0	0	0	0	0	0	0	0	0	0	0	0	0	0	0	0	0	0	0	0	0	0	0	0	0	0	0	0	0	0
0	0	0	0	0	0	0	0	0	0	0	0	0	0	0	0	0	0	0	0	0	0	0	0	0	0	0	0	0	0	0	0	0	0	0	0	0	0	0	0	0	0	0	0	0	0	0	0	0	0
0	0	0	0	0	0	0	0	0	0	0	0	0	0	0	0	0	0	0	0	0	0	0	0	0	0	0	0	0	0	0	0	0	0	0	0	0	0	0	0	0	0	0	0	0	0	0	0	0	0
0	0	0	0	0	0	0	0	0	0	0	0	0	0	0	0	0	0	0	0	0	0	0	0	0	0	0	0	0	0	0	0	0	0	0	0	0	0	0	0	0	0	0	0	0	0	0	0	0	0
0	0	0	0	0	0	0	0	0	0	0	0	0	0	0	0	0	0	0	0	0	0	0	0	0	0	0	0	0	0	0	0	0	0	0	0	0	0	0	0	0	0	0	0	0	0	0	0	0	0
0	0	0	0	0	0	0	0	0	0	0	0	0	0	0	0	0	0	0	0	0	0	0	0	0	0	0	0	0	0	0	0	0	0	0	0	0	0	0	0	0	0	0	0	0	0	0	0	0	0
0	0	0	0	0	0	0	0	0	0	0	0	0	0	0	0	0	0	0	0	0	0	0	0	0	0	0	0	0	0	0	0	0	0	0	0	0	0	0	0	0	0	0	0	0	0	0	0	0	0
0	0	0	0	0	0	0	0	0	0	0	0	0	0	0	0	0	0	0	0	0	0	0	0	0	0	0	0	0	0	0	0	0	0	0	0	0	0	0	0	0	0	0	0	0	0	0	0	0	0
0	0	0	0	0	0	0	0	0	0	0	0	0	0	0	0	0	0	0	0	0	0	0	0	0	0	0	0	0	0	0	0	0	0	0	0	0	0	0	0	0	0	0	0	0	0	0	0	0	0
0	0	0	0	0	0	0	0	0	0	0	0	0	0	0	0	0	0	0	0	0	0	0	0	0	0	0	0	0	0	0	0	0	0	0	0	0	0	0	0	0	0	0	0	0	0	0	0	0	0
0	0	0	0	0	0	0	0	0	0	0	0	0	0	0	0	0	0	0	0	0	0	0	0	0	0	0	0	0	0	0	0	0	0	0	0	0	0	0	0	0	0	0	0	0	0	0	0	0	0
0	0	0	0	0	0	0	0	0	0	0	0	0	0	0	0	0	0	0	0	0	0	0	0	0	0	0	0	0	0	0	0	0	0	0	0	0	0	0	0	0	0	0	0	0	0	0	0	0	0
0	0	0	0	0	0	0	0	0	0	0	0	0	0	0	0	0	0	0	0	0	0	0	0	0	0	0	0	0	0	0	0	0	0	0	0	0	0	0	0	0	0	0	0	0	0	0	0	0	0
0	0	0	0	0	0	0	0	0	0	0	0	0	0	0	0	0	0	0	0	0	0	0	0	0	0	0	0	0	0	0	0	0	0	0	0	0	0	0	0	0	0	0	0	0	0	0	0	0	0
0	0	0	0	0	0	0	0	0	0	0	0	0	0	0	0	0	0	0	0	0	0	0	0	0	0	0	0	0	0	0	0	0	0	0	0	0	0	0	0	0	0	0	0	0	0	0	0	0	0
0	0	0	0	0	0	0	0	0	0	0	0	0	0	0	0	0	0	0	0	0	0	0	0	0	0	0	0	0	0	0	0	0	0	0	0	0	0	0	0	0	0	0	0	0	0	0	0	0	0
0	0	0	0	0	0	0	0	0	0	0	0	0	0	0	0	0	0	0	0	0	0	0	0	0	0	0	0	0	0	0	0	0	0	0	0	0	0	0	0	0	0	0	0	0	0	0	0	0	0
0	0	0	0	0	0	0	0	0	0	0	0	0	0	0	0	0	0	0	0	0	0	0	0	0	0	0	0	0	0	0	0	0	0	0	0	0	0	0	0	0	0	0	0	0	0	0	0	0	0
0	0	0	0	0	0	0	0	0	0	0	0	0	0	0	0	0	0	0	0	0	0	0	0	0	0	0	0	0	0	0	0	0	0	0	0	0	0	0	0	0	0	0	0	0	0	0	0	0	0
0	0	0	0	0	0	0	0	0	0	0	0	0	0	0	0	0	0	0	0	0	0	0	0	0	0	0	0	0	0	0	0	0	0	-0.00194053	0.0195637	0.0236092	0.0249258	0.0255028	0.0206247	0.00847348	0.00671455	0.0328616	0	0	0	0	0	0	0
0	0	0	0	0	0	0	0	0	0	0	0	0	0	0	0	0	0	0	0	0	0	0	0	0	0	0	0	0	0	0	0	0	0.0040019	0.0167017	0.0233906	0.00660979	0.0135032	0.0160445	0.0092524	0.00285367	0.00823012	0.033614	0.000195413	0	0	0	0	0	0
0	0	0	0	0	0	0	0	0	0	0	0	0	0	0	0	0	0	0	0	0	0	0	0	0	0	0	0	0	0	0	0	0.0169087	0.0103289	0.012415	0.0128384	0.00385033	-0.00971324	-0.0128766	0.00574925	0.00820791	0.0152182	0.0251335	0.0241276	0.000709933	0	0	0	0	0
0	0	0	0	0	0	0	0	0	0	0	0	0	0	0	0	0	0	0	0	0	0	0	0	0	0	0	0	0	0	0	-0.0124177	0.0195736	-0.00472315	0.0166572	0.000761763	-0.00568107	-0.0106987	-0.00478117	-0.022013	-0.0393963	0.0153352	0.0418677	0.0451938	0.00835328	0.00309014	0	0	0	0
0	0	0	0	0	0	0	0	0	0	0	0	0	0	0	0	0	0	0	0	0	0	0	0	0	0	0	0	0	0	-0.0111432	-0.0143769	0.00407448	-0.019719	-0.0131357	-0.021109	-0.0215804	-0.0195071	-0.0149922	-0.00990401	-0.00774695	-0.022144	-0.0153863	0.0449978	0.0205339	0.00740971	0.00665736	0	0	0
0	0	0	0	0	0	0	0	0	0	0	0	0	0	0	0	0	0	0	0	0	0	0	0	0	0	0	0	0	-0.00187629	-0.00143324	-0.013566	0.00121536	-0.0194787	-0.00838677	-0.00329593	-0.0171002	-0.00845624	-0.0161094	-0.0212299	-0.0133155	-0.0110318	-0.00676576	0.00839694	0.00466853	0.0247203	0.0127109	0.00953342	0	0
0	0	0	0	0	0	0	0	0	0	0	0	0	0	0	0	0	0	0	0	0	0	0	0	0	0	0	0	0	0.0728784	0.0953868	0.113424	0.193632	0.136499	0.0489988	-0.0519734	-0.196061	-0.256234	-0.267023	-0.292907	-0.276739	-0.186867	0.0328173	0.0813671	0.0531402	0.0199364	-0.0696753	-0.154033	0	0
0	0	0	0	0	0	0	0	0	0	0	0	0	0	0	0	0	0	0	0	0	0	0	0	0	0	0	0	0	-0.0191129	-0.0138575	-0.0165914	-0.0124835	-0.0322375	-0.0264819	-0.0378623	-0.0260824	-0.00765546	-0.00953159	-0.0234801	-0.0177538	0.00477681	0.0128215	-0.00901023	-0.0139032	0.0015188	0.0174056	0.0130975	0.0199561	0
0	0	0	0	0	0	0	0	0	0	0	0	0	0	0	0	0	0	0	0	0	0	0	0	0	0	0	0	0	-0.00923411	-0.0134887	-0.0134363	-0.0149582	-0.0229694	-0.0416472	-0.0481148	0.00491927	-0.0164258	-0.00683507	-0.0153873	-0.0252083	-0.022141	-0.0200384	-0.00539854	0.00170892	0.00544992	0.0109753	0.00417215	0.0151356	0.0189915
0	0	0	0	0	0	0	0	0	0	0	0	0	0	0	0	0	0	0	0	0	0	0	0	0	0	0	0	0	-0.0131612	-0.0140505	-0.00709069	-0.0135693	-0.0201928	-0.0377711	-0.035508	0.0134475	-0.000676165	-0.0423029	-0.0340902	-0.0347564	-0.0481529	-0.0328629	-0.0379622	-0.0192443	-0.00525847	0.0151419	-0.00218454	0.0102335	0.016831
0	0	0	0	0	0	0	0	0	0	0	0	0	0	0	0	0	0	0	0	0	0	0	0	0	0	0	0	0	-0.0153364	-0.00952008	-0.0135921	-0.00789995	-0.0196538	-0.0269432	-0.0366244	-0.0221565	0.0043761	-0.0392955	-0.045461	-0.0457956	-0.0463407	-0.0477495	-0.0695032	-0.0366873	-0.0311327	-0.0055734	0.0147056	0.0168397	0.0218015
0	0	0	0	0	0	0	0	0	0	0	0	0	0	0	0	0	0	0	0	0	0	0	0	0	0	0	0	0	-0.0180977	-0.020131	-0.0200472	0.00370013	-0.0111922	-0.0274861	-0.0378592	-0.0559793	0.0328201	-0.0286473	-0.0454713	-0.0716096	-0.0358661	-0.0679181	-0.0815211	-0.0703737	-0.0732001	-0.0383758	-0.00831691	0.0290152	0.0452358
0	0	0	0	0	0	0	0	0	0	0	0	0	0	0	0	0	0	0	0	0	0	0	0	0	0	0	0	0	0	-0.0160023	-0.0258674	-0.0250952	0.0109827	-0.031268	-0.0405242	-0.0350381	-0.0563953	-0.0483034	-0.00678375	-0.0656434	-0.0326253	-0.0457353	-0.0620929	-0.0700198	-0.0953158	-0.0832496	-0.0562608	-0.0121079	0.0439768
0	0	0	0	0	0	0	0	0	0	0	0	0	0	0	0	0	0	0	0	0	0	0	0	0	0	0	0	0	0	-0.0256417	-0.0299582	-0.0288447	-0.0137544	-0.00661802	0.00247986	-0.0257898	-0.0686562	-0.0429218	-0.0412887	-0.0567781	-0.0421789	-0.0598665	-0.0406078	-0.0566718	-0.0887898	-0.0798838	-0.0573971	-0.0276564	0.0399099
0	0	0	0	0	0	0	0	0	0	0	0	0	0	0	0	0	0	0	0	0	0	0	0	0	0	0	0	0	0	0	-0.0335953	-0.0231636	-0.0473529	0.0210857	-0.0232293	-0.0608992	-0.0669487	-0.0286743	-0.0530174	-0.0805883	-0.0567329	-0.059443	-0.0141034	-0.0442369	-0.0504317	-0.0717354	-0.105399	-0.0970764	0.0113018
0	0	0	0	0	0	0	0	0	0	0	0	0	0	0	0	0	0	0	0	0	0	0	0	0	0	0	0	0	0	0	0	-0.0270374	-0.0590475	-0.0691975	-0.0215313	-0.0359334	-0.054691	-0.0802107	-0.0955608	-0.0604642	-0.0128159	-0.0394917	-0.0638933	-0.0405798	-0.0687932	-0.0746427	-0.109166	-0.0861821	-0.00849463
0	0	0	0	0	0	0	0	0	0	0	0	0	0	0	0	0	0	0	0	0	0	0	0	0	0	0	0	0	0	0	0	0	-0.040722	-0.0735101	-0.0448776	-0.025619	-0.028006	-0.0746455	-0.0951623	-0.0691305	0.0170774	-0.0446876	-0.0856143	-0.0867211	-0.0726776	-0.0533633	-0.0757593	-0.0691492	0.0038666
0	0	0	0	0	0	0	0	0	0	0	0	0	0	0	0	0	0	0	0	0	0	0	0	0	0	0	0	0	0	0	0	0	0	-0.0404612	-0.0684793	-0.0323155	-0.053279	-0.0691102	-0.0172142	-0.0564935	-0.0861158	-0.128885	-0.083079	-0.0737402	-0.0576154	-0.0539748	-0.00216313	0.0201729	0.0730793
0	0	0	0	0	0	0	0	0	0	0	0	0	0	0	0	0	0	0	0	0	0	0	0	0	0	0	0	0	0	0	0	0	0	0	-0.0651004	-0.0495091	-0.0348251	-0.0506319	-0.0424129	-0.0901852	-0.050409	-0.100125	-0.0569173	-0.0902877	-0.0534045	-0.0260344	0.0141628	0.0341732	0.047555
0	0	0	0	0	0	0	0	0	0	0	0	0	0	0	0	0	0	0	0	0	0	0	0	0	0	0	0	0	0	0	0	0	0	0	0	-0.078197	-0.0334454	-0.0484303	-0.0621807	-0.0303139	-0.0694603	-0.0568888	-0.0506813	-0.094237	-0.0416438	0.00585349	0.0282972	0.00301613	0.0653843
0	0	0	0	0	0	0	0	0	0	0	0	0	0	0	0	0	0	0	0	0	0	0	0	0	0	0	0	0	0	0	0	0	0	0	0	0	0	0	0.000277291	-0.0407956	-0.0520942	-0.0393503	-0.0641635	-0.0724845	0.00859897	0.0238991	0.0144405	0.0188915	0
0	0	0	0	0	0	0	0	0	0	0	0	0	0	0	0	0	0	0	0	0	0	0	0	0	0	0	0	0	0	0	0	0	0	0	0	0	0	0	0	0	0	0	0	0	0	0	0	0	0
0	0	0	0	0	0	0	0	0	0	0	0	0	0	0	0	0	0	0	0	0	0	0	0	0	0	0	0	0	0	0	0	0	0	0	0	0	0	0	0	0	0	0	0	0	0	0	0	0	0
0	0	0	0	0	0	0	0	0	0	0	0	0	0	0	0	0	0	0	0	0	0	0	0	0	0	0	0	0	0	0	0	0	0	0	0	0	0	0	0	0	0	0	0	0	0	0	0	0	0
0	0	0	0	0	0	0	0	0	0	0	0	0	0	0	0	0	0	0	0	0	0	0	0	0	0	0	0	0	0	0	0	0	0	0	0	0	0	0	0	0	0	0	0	0	0	0	0	0	0
0	0	0	0	0	0	0	0	0	0	0	0	0	0	0	0	0	0	0	0	0	0	0	0	0	0	0	0	0	0	0	0	0	0	0	0	0	0	0	0	0	0	0	0	0	0	0	0	0	0
0	0	0	0	0	0	0	0	0	0	0	0	0	0	0	0	0	0	0	0	0	0	0	0	0	0	0	0	0	0	0	0	0	0	0	0	0	0	0	0	0	0	0	0	0	0	0	0	0	0
0	0	0	0	0	0	0	0	0	0	0	0	0	0	0	0	0	0	0	0	0	0	0	0	0	0	0	0	0	0	0	0	0	0	0	0	0	0	0	0	0	0	0	0	0	0	0	0	0	0
0	0	0	0	0	0	0	0	0	0	0	0	0	0	0	0	0	0	0	0	0	0	0	0	0	0	0	0	0	0	0	0	0	0	0	0	0	0	0	0	0	0	0	0	0	0	0	0	0	0
0	0	0	0	0	0	0	0	0	0	0	0	0	0	0	0	0	0	0	0	0	0	0	0	0	0	0	0	0	0	0	0	0	0	0	0	0	0	0	0	0	0	0	0	0	0	0	0	0	0
0	0	0	0	0	0	0	0	0	0	0	0	0	0	0	0	0	0	0	0	0	0	0	0	0	0	0	0	0	0	0	0	0	0	0	0	0	0	0	0	0	0	0	0	0	0	0	0	0	0
0	0	0	0	0	0	0	0	0	0	0	0	0	0	0	0	0	0	0	0	0	0	0	0	0	0	0	0	0	0	0	0	0	0	0	0	0	0	0	0	0	0	0	0	0	0	0	0	0	0
0	0	0	0	0	0	0	0	0	0	0	0	0	0	0	0	0	0	0	0	0	0	0	0	0	0	0	0	0	0	0	0	0	0	0	0	0	0	0	0	0	0	0	0	0	0	0	0	0	0
0	0	0	0	0	0	0	0	0	0	0	0	0	0	0	0	0	0	0	0	0	0	0	0	0	0	0	0	0	0	0	0	0	0	0	0	0	0	0	0	0	0	0	0	0	0	0	0	0	0
0	0	0	0	0	0	0	0	0	0	0	0	0	0	0	0	0	0	0	0	0	0	0	0	0	0	0	0	0	0	0	0	0	0	0	0	0	0	0	0	0	0	0	0	0	0	0	0	0	0
0	0	0	0	0	0	0	0	0	0	0	0	0	0	0	0	0	0	0	0	0	0	0	0	0	0	0	0	0	0	0	0	0	0	0	0	0	0	0	0	0	0	0	0	0	0	0	0	0	0
0	0	0	0	0	0	0	0	0	0	0	0	0	0	0	0	0	0	0	0	0	0	0	0	0	0	0	0	0	0	0	0	0	0	0	0	0	0	0	0	0	0	0	0	0	0	0	0	0	0
0	0	0	0	0	0	0	0	0	0	0	0	0	0	0	0	0	0	0	0	0	0	0	0	0	0	0	0	0	0	0	0	0	0	0	0	0	0	0	0	0	0	0	0	0	0	0	0	0	0
0	0	0	0	0	0	0	0	0	0	0	0	0	0	0	0	0	0	0	0	0	0	0	0	0	0	0	0	0	0	0	0	0	0	0	0	0	0	0	0	0	0	0	0	0	0	0	0	0	0
0	0	0	0	0	0	0	0	0	0	0	0	0	0	0	0	0	0	0	0	0	0	0	0	0	0	0	0	0	0	0	0	0	0	0	0	0	0	0	0	0	0	0	0	0	0	0	0	0	0
0	0	0	0	0	0	0	0	0	0	0	0	0	0	0	0	0	0	0	0	0	0	0	0	0	0	0	0	0	0	0	0	0	0	0	0	0	0	0	0	0	0	0	0	0	0	0	0	0	0
0	0	0	0	0	0	0	0	0	0	0	0	0	0	0	0	0	0	0	0	0	0	0	0	0	0	0	0	0	0	0	0	0	0	0	0	0	0	0	0	0	0	0	0	0	0	0	0	0	0
0	0	0	0	0	0	0	0	0	0	0	0	0	0	0	0	0	0	0	0	0	0	0	0	0	0	0	0	0	0	0	0	0	0	0	0	0	0	0	0	0	0	0	0	0	0	0	0	0	0
0	0	0	0	0	0	0	0	0	0	0	0	0	0	0	0	0	0	0	0	0	0	0	0	0	0	0	0	0	0	0	0	0	0	0	0	0	0	0	0	0	0	0	0	0	0	0	0	0	0
0	0	0	0	0	0	0	0	0	0	0	0	0	0	0	0	0	0	0	0	0	0	0	0	0	0	0	0	0	0	0	0	0	0	0	0	0	0	0	0	0	0	0	0	0	0	0	0	0	0
0	0	0	0	0	0	0	0	0	0	0	0	0	0	0	0	0	0	0	0	0	0	0	0	0	0	0	0	0	0	0	0	0	0	0	0	0	0	0	0	0	0	0	0	0	0	0	0	0	0
0	0	0	0	0	0	0	0	0	0	0	0	0	0	0	0	0	0	0	0	0	0	0	0	0	0	0	0	0	0	0	0	0	0	0	0	0	0	0	0	0	0	0	0	0	0	0	0	0	0
0	0	0	0	0	0	0	0	0	0	0	0	0	0	0	0	0	0	0	0	0	0	0	0	0	0	0	0	0	0	0	0	0	0	0	0	0	0	0	0	0	0	0	0	0	0	0	0	0	0
0	0	0	0	0	0	0	0	0	0	0	0	0	0	0	0	0	0	0	0	0	0	0	0	0	0	0	0	0	0	0	0	0	0	0	0	0	0	0	0	0	0	0	0	0	0	0	0	0	0
0	0	0	0	0	0	0	0	0	0	0	0	0	0	0	0	0	0	0	0	0	0	0	0	0	0	0	0	0	0	0	0	0	0	0	0	0	0	0	0	0	0	0	0	0	0	0	0	0	0
0	0	0	0	0	0	0	0	0	0	0	0	0	0	0	0	0	0	0	0	0	0	0	0	0	0	0	0	0	0	0	0	0	0	0	0	0	0	0	0	0	0	0	0	0	0	0	0	0	0
0	0	0	0	0	0	0	0	0	0	0	0	0	0	0	0	0	0	0	0	0	0	0	0	0	0	0	0	0	0	0	0	0	0	0	0	0	0	0	0	0	0	0	0	0	0	0	0	0	0
0	0	0	0	0	0	0	0	0	0	0	0	0	0	0	0	0	0	0	0	0	0	0	0	0	0	0	0	0	0	0	0	0	0	0	0	0	0	0	0	0	0	0	0	0	0	0	0	0	0
0	0	0	0	0	0	0	0	0	0	0	0	0	0	0	0	0	0	0	0	0	0	0	0	0	0	0	0	0	0	0	0	0	0	0	0	0	0	0	0	0	0	0	0	0	0	0	0	0	0
0	0	0	0	0	0	0	0	0	0	0	0	0	0	0	0	0	0	0	0	0	0	0	0	0	0	0	0	0	0	0	0	0	0	0	0	0	0	0	0	0	0	0	0	0	0	0	0	0	0
0	0	0	0	0	0	0	0	0	0	0	0	0	0	0	0	0	0	0	0	0	0	0	0	0	0	0	0	0	0	0	0	0	0	0	0	0	0	0	0	0	0	0	0	0	0	0	0	0	0
0	0	0	0	0	0	0	0	0	0	0	0	0	0	0	0	0	0	0	0	0	0	0	0	0	0	0	0	0	0	0	0	0	0	0	0	0	0	0	0	0	0	0	0	0	0	0	0	0	0
0	0	0	0	0	0	0	0	0	0	0	0	0	0	0	0	0	0	0	0	0	0	0	0	0	0	0	0	0	-0.0433847	-0.0310271	-0.0402482	-0.0317612	-0.0130111	0.00164531	-0.018305	-0.0381097	0.0389783	0.0638603	0	0	0	0	0	0	0	0	0	0	0
0	0	0	0	0	0	0	0	0	0	0	0	0	0	0	0	0	0	0	0	0	0	0	0	0	0	0	0	-0.077238	-0.0479042	-0.047386	-0.0524378	-0.037088	-0.0129338	-0.00877693	-0.00274113	0.0390774	0.0252914	0.0351299	0.0458917	0.0552033	0	0	0	0	0	0	0	0	0
0	0	0	0	0	0	0	0	0	0	0	0	0	0	0	0	0	0	0	0	0	0	0	0	0	0	-0.0257567	0.00176516	-0.0199942	-0.0342425	-0.0431046	-0.0187813	-0.0163879	-0.0252385	-0.0178937	0.011705	0.0728577	0.0174926	0.0491168	0.0445076	0.0239346	0.0570816	0	0	0	0	0	0	0	0
0	0	0	0	0	0	0	0	0	0	0	0	0	0	0	0	0	0	0	0	0	0	0	0	0	-0.0136242	-0.00958639	-0.0330115	-0.00502404	0.0339387	-0.0217201	-0.031709	-0.0165821	-0.012247	0.0266868	0.0240157	0.0125674	0.052537	0.0508823	0.0206095	0.030669	0.0268289	0.0384158	0	0	0	0	0	0	0
0	0	0	0	0	0	0	0	0	0	0	0	0	0	0	0	0	0	0	0	0	0	0	0	0	-0.0180599	-0.00325046	0.0135571	-0.0126156	-0.00572951	0.0214432	0.00650915	0.0138061	0.00981915	0.0577192	0.0435885	0.0328987	0.020655	0.020789	0.0360885	0.0412853	0.0361497	0.0182339	0.00607166	0	0	0	0	0	0
0	0	0	0	0	0	0	0	0	0	0	0	0	0	0	0	0	0	0	0	0	0	0	0	-0.00109595	-0.0115015	-0.00286525	0.00132236	0.002127	-0.0036513	0.0355419	0.000535679	0.00622112	0.0396886	0.0639044	0.050926	0.0458671	0.0205211	0.020689	0.031534	0.0477751	0.0269149	0.0168597	-0.00562507	0.0183812	0	0	0	0	0
0	0	0	0	0	0	0	0	0	0	0	0	0	0	0	0	0	0	0	0	0	0	0	0	-0.0296661	0.0333039	-0.0161267	-0.00787846	-0.0111483	0.0328654	0.0137149	0.00888165	0.0339176	0.0372371	0.0461762	0.065767	0.037768	0.0149921	-0.0014597	0.0195555	0.0389354	0.0266559	0.00513869	-0.00666372	-0.00330954	0	0	0	0	0
0	0	0	0	0	0	0	0	0	0	0	0	0	0	0	0	0	0	0	0	0	0	0	-0.051898	0.0633652	0.18856	0.19028	0.12939	0.153693	0.162234	0.111117	0.045972	0.0427253	0.118116	0.171167	0.091934	0.0338812	0.0675026	0.0925748	0.149798	0.153877	0.0920343	0.0192106	-0.018717	-0.00110698	0.00614677	0	0	0	0
0	0	0	0	0	0	0	0	0	0	0	0	0	0	0	0	0	0	0	0	0	0	0	-0.0296222	0.0120896	0.0246413	0.00404908	-0.0169132	-0.0155525	0.0239232	-0.00249851	-0.00132132	0.0231221	0.00857245	0.0144589	0.0361581	0.0218932	0.0134508	0.00945609	0.0124402	0.018319	0.0171187	0.00348529	-0.00452367	-0.00710805	-0.00405437	0	0	0	0
0	0	0	0	0	0	0	0	0	0	0	0	0	0	0	0	0	0	0	0	0	0	-0.0186412	-0.0320961	-0.00426995	-0.00268527	-0.0309299	0.0100461	0.0206385	0.0240201	-0.00400558	-0.017736	0.00204211	-0.00648623	0.00999893	0.0343292	0.0236016	0.0242801	0.0114443	0.0125181	0.0156323	0.00737879	-0.000294463	-0.00293635	-7.36539e-05	-0.00943063	0	0	0	0
0	0	0	0	0	0	0	0	0	0	0	0	0	0	0	0	0	0	0	0	0	0	-0.0167031	-0.0336703	-0.00994106	-0.00585009	-0.0215428	-0.0261012	0.0142821	0.00726812	-0.0396697	-0.0447565	-0.00519696	-0.00353371	0.0132239	0.032356	0.0102099	0.00737401	0.0156413	0.0107567	0.0102159	0.00308779	0.00127956	-0.00356765	-0.00411489	-0.00423101	0	0	0	0
0	0	0	0	0	0	0	0	0	0	0	0	0	0	0	0	0	0	0	0	0	0	-0.0273345	-0.0116483	-0.00906063	-0.00916344	0.00748507	0.000813294	-0.00951505	-0.00569667	0.00306071	-0.012014	0.00290233	0.0107797	0.0136609	0.0142308	-0.00936798	-0.0131568	0.00083025	-0.00231308	0.00809373	0.00523096	-0.00396012	-0.00866953	-0.00700769	-0.0126508	0	0	0	0
0	0	0	0	0	0	0	0	0	0	0	0	0	0	0	0	0	0	0	0	0	0	-0.0216196	-0.013043	-0.00634186	-0.00755148	-0.000844724	-0.003286	-0.0103755	-0.0116925	0.000872329	-0.00910567	0.00864283	0.0145557	0.0183914	-0.0143703	-0.0128978	-0.00861976	-0.00099318	-0.0115348	-0.0111803	-0.00397196	0.00642073	-0.0112425	-0.0104506	0	0	0	0	0
0	0	0	0	0	0	0	0	0	0	0	0	0	0	0	0	0	0	0	0	0	0	-0.0260025	-0.0132216	-0.0169661	-0.0134249	-0.00786527	-0.0135969	-0.00999869	0.00326895	0.000165728	-0.00168116	0.0140519	-0.00162907	-0.0157533	-0.0106636	-0.0097129	-0.0104489	-0.0158324	-0.0163065	-0.0104989	-0.0109134	0.00480156	-0.0117433	-0.01026	0	0	0	0	0
0	0	0	0	0	0	0	0	0	0	0	0	0	0	0	0	0	0	0	0	0	0	-0.0253219	-0.0207055	-0.012838	-0.0112149	-0.0129857	-0.0183222	-0.00973038	-0.000643585	-0.00383625	-0.0151392	0.00333514	-0.0225006	-0.0130237	-0.00677201	-0.00958877	-0.0154296	-0.0214333	-0.0140122	-0.0200633	-0.013432	0.00219199	-0.0135626	0	0	0	0	0	0
0	0	0	0	0	0	0	0	0	0	0	0	0	0	0	0	0	0	0	0	0	0	-0.0306235	-0.0214704	-0.0146748	-0.00942546	-0.00678952	-0.0183012	-0.00674905	-0.00642753	-0.00892367	-0.0156145	-0.00891004	-0.0220458	-0.014184	-0.0138107	-0.01524	-0.0177697	-0.0178145	-0.0179248	-0.018258	-0.0212219	-0.00539612	-0.0127166	0	0	0	0	0	0
0	0	0	0	0	0	0	0	0	0	0	0	0	0	0	0	0	0	0	0	0	0	-0.030485	-0.0221522	-0.0202677	-0.0144995	-0.01543	-0.0161822	-0.0130272	-0.00656997	-0.0155451	-0.0167188	-0.0088699	-0.0192745	-0.0131737	-0.0181885	-0.0216099	-0.0224234	-0.013528	-0.0176574	-0.022689	-0.0116874	0.00877521	0	0	0	0	0	0	0
0	0	0	0	0	0	0	0	0	0	0	0	0	0	0	0	0	0	0	0	0	0	0	0	-0.0273905	-0.0227355	-0.0245393	-0.032178	-0.0211683	-0.0150884	-0.0271279	-0.0304383	-0.023577	-0.0292215	-0.027616	-0.016952	-0.0212585	-0.0220812	-0.0240976	-0.0153582	-0.0176906	0	0	0	0	0	0	0	0	0
0	0	0	0	0	0	0	0	0	0	0	0	0	0	0	0	0	0	0	0	0	0	0	0	0	0	0	0	-0.0347936	-0.0323253	-0.0342856	-0.0290497	-0.0166656	-0.028496	-0.0245585	-0.0282736	-0.0355907	0	0	0	0	0	0	0	0	0	0	0	0	0
0	0	0	0	0	0	0	0	0	0	0	0	0	0	0	0	0	0	0	0	0	0	0	0	0	0	0	0	0	0	0	0	0	0	0	0	0	0	0	0	0	0	0	0	0	0	0	0	0	0
0	0	0	0	0	0	0	0	0	0	0	0	0	0	0	0	0	0	0	0	0	0	0	0	0	0	0	0	0	0	0	0	0	0	0	0	0	0	0	0	0	0	0	0	0	0	0	0	0	0
0	0	0	0	0	0	0	0	0	0	0	0	0	0	0	0	0	0	0	0	0	0	0	0	0	0	0	0	0	0	0	0	0	0	0	0	0	0	0	0	0	0	0	0	0	0	0	0	0	0
0	0	0	0	0	0	0	0	0	0	0	0	0	0	0	0	0	0	0	0	0	0	0	0	0	0	0	0	0	0	0	0	0	0	0	0	0	0	0	0	0	0	0	0	0	0	0	0	0	0
0	0	0	0	0	0	0	0	0	0	0	0	0	0	0	0	0	0	0	0	0	0	0	0	0	0	0	0	0	0	0	0	0	0	0	0	0	0	0	0	0	0	0	0	0	0	0	0	0	0
0	0	0	0	0	0	0	0	0	0	0	0	0	0	0	0	0	0	0	0	0	0	0	0	0	0	0	0	0	0	0	0	0	0	0	0	0	0	0	0	0	0	0	0	0	0	0	0	0	0
0	0	0	0	0	0	0	0	0	0	0	0	0	0	0	0	0	0	0	0	0	0	0	0	0	0	0	0	0	0	0	0	0	0	0	0	0	0	0	0	0	0	0	0	0	0	0	0	0	0
0	0	0	0	0	0	0	0	0	0	0	0	0	0	0	0	0	0	0	0	0	0	0	0	0	0	0	0	0	0	0	0	0	0	0	0	0	0	0	0	0	0	0	0	0	0	0	0	0	0
0	0	0	0	0	0	0	0	0	0	0	0	0	0	0	0	0	0	0	0	0	0	0	0	0	0	0	0	0	0	0	0	0	0	0	0	0	0	0	0	0	0	0	0	0	0	0	0	0	0
0	0	0	0	0	0	0	0	0	0	0	0	0	0	0	0	0	0	0	0	0	0	0	0	0	0	0	0	0	0	0	0	0	0	0	0	0	0	0	0	0	0	0	0	0	0	0	0	0	0
0	0	0	0	0	0	0	0	0	0	0	0	0	0	0	0	0	0	0	0	0	0	0	0	0	0	0	0	0	0	0	0	0	0	0	0	0	0	0	0	0	0	0	0	0	0	0	0	0	0
0	0	0	0	0	0	0	0	0	0	0	0	0	0	0	0	0	0	0	0	0	0	0	0	0	0	0	0	0	0	0	0	0	0	0	0	0	0	0	0	0	0	0	0	0	0	0	0	0	0
0	0	0	0	0	0	0	0	0	0	0	0	0	0	0	0	0	0	0	0	0	0	0	0	0	0	0	0	0	0	0	0	0	0	0	0	0	0	0	0	0	0	0	0	0	0	0	0	0	0
0	0	0	0	0	0	0	0	0	0	0	0	0	0	0	0	0	0	0	0	0	0	0	0	0	0	0	0	0	0	0	0	0	0	0	0	0	0	0	0	0	0	0	0	0	0	0	0	0	0
0	0	0	0	0	0	0	0	0	0	0	0	0	0	0	0	0	0	0	0	0	0	0	0	0	0	0	0	0	0	0	0	0	0	0	0	0	0	0	0	0	0	0	0	0	0	0	0	0	0
0	0	0	0	0	0	0	0	0	0	0	0	0	0	0	0	0	0	0	0	0	0	0	0	0	0	0	0	0	0	0	0	0	0	0	0	0	0	0	0	0	0	0	0	0	0	0	0	0	0
0	0	0	0	0	0	0	0	0	0	0	0	0	0	0	0	0	0	0	0	0	0	0	0	0	0	0	0	0	0	0	0	0	0	0	0	0	0	0	0	0	0	0	0	0	0	0	0	0	0
0	0	0	0	0	0	0	0	0	0	0	0	0	0	0	0	0	0	0	0	0	0	0	0	0	0	0	0	0	0	0	0	0	0	0	0	0	0	0	0	0	0	0	0	0	0	0	0	0	0
0	0	0	0	0	0	0	0	0	0	0	0	0	0	0	0	0	0	0	0	0	0	0	0	0	0	0	0	0	0	0	0	0	0	0	0	0	0	0	0	0	0	0	0	0	0	0	0	0	0
0	0	0	0	0	0	0	0	0	0	0	0	0	0	0	0	0	0	0	0	0	0	0	0	0	0	0	0	0	0	0	0	0	0	0	0	0	0	0	0	0	0	0	0	0	0	0	0	0	0
0	0	0	0	0	0	0	0	0	0	0	0	0	0	0	0	0	0	0	0	0	0	0	0	0	0	0	0	0	0	0	0	0	0	0	0	0	0	0	0	0	0	0	0	0	0	0	0	0	0
0	0	0	0	0	0	0	0	0	0	0	0	0	0	0	0	0	0	0	0	0	0	0	0	0	0	0	0	0	0	0	0	0	0	0	0	0	0	0	0	0	0	0	0	0	0	0	0	0	0
0	0	0	0	0	0	0	0	0	0	0	0	0	0	0	0	0	0	0	0	0	0	0	0	0	0	0	0	0	0	0	0	0	0	0	0	0	0	0	0	0	0	0	0	0	0	0	0	0	0
0	0	0	0	0	0	0	0	0	0	0	0	0	0	0	0	0	0	0	0	0	0	0	0	0	0	0	0	0	0	0	0	0	0	0	0	0	0	0	0	0	0	0	0	0	0	0	0	0	0
0	0	0	0	0	0	0	0	0	0	0	0	0	0	0	0	0	0	0	0	0	0	0	0	0	0	0	0	0	0	0	0	0	0	0	0	0	0	0	0	0	0	0	0	0	0	0	0	0	0
0	0	0	0	0	0	0	0	0	0	0	0	0	0	0	0	0	0	0	0	0	0	0	0	0	0	0	0	0	0	0	0	0	0	0	0	0	0	0	0	0	0	0	0	0	0	0	0	0	0
0	0	0	0	0	0	0	0	0	0	0	0	0	0	0	0	0	0	0	0	0	0	0	0	0	0	0	0	0	0	0	0	0	0	0	0	0	0	0	0	0	0	0	0	0	0	0	0	0	0
0	0	0	0	0	0	0	0	0	0	0	0	0	0	0	0	0	0	0	0	0	0	0	0	0	0	0	0	0	0	0	0	0	0	0	0	0	0	0	0	0	0	0	0	0	0	0	0	0	0
0	0	0	0	0	0	0	0	0	0	0	0	0	0	0	0	0	0	0	0	0	0	0	0	0	0	0	0	0	0	0	0	0	0	0	0	0	0	0	0	0	0	0	0	0	0	0	0	0	0
0	0	0	0	0	0	0	0	0	0	0	0	0	0	0	0	0	0	-0.0183484	-0.0122334	-0.0140441	-0.0115242	-0.0139899	-0.0160785	-0.00997066	-0.00364595	0	0	0	0	0	0	0	0	0	0	0	0	0	0	0	0	0	0	0	0	0	0	0	0
0	0	0	0	0	0	0	0	0	0	0	0	0	0	0	0	0	-0.0175945	-0.010416	-0.00504777	-0.0107334	-0.00799884	-0.0147417	-0.0163974	-0.0172184	-0.0093017	-0.00808454	-0.0013736	0	0	0	0	0	0	0	0	0	0	0	0	0	0	0	0	0	0	0	0	0	0
0	0	0	0	0	0	0	0	0	0	0	0	0	0	0	0	-0.0204648	-0.00836502	-0.00095442	-0.0125885	-0.0117793	-0.0179093	-0.0224975	-0.0236397	-0.016127	-0.000667823	-0.00975763	0.0143606	0.00979343	0.0231927	0.024239	0	0	0	0	0	0	0	0	0	0	0	0	0	0	0	0	0	0	0
0	0	0	0	0	0	0	0	0	0	0	0	0	0	0	-0.122307	0.0803749	0.0382615	-0.00868206	-0.0128697	-0.0194662	-0.041549	-0.0464922	-0.0407064	-0.0337807	-0.0295886	-0.0016985	0.097755	0.282312	0.513217	0.576074	0.396511	0.132151	0	0	0	0	0	0	0	0	0	0	0	0	0	0	0	0	0
0	0	0	0	0	0	0	0	0	0	0	0	0	0	-0.00800956	-0.0209034	-0.0139318	-0.0207439	-0.0162194	-0.0230838	-0.0166396	-0.0174748	-0.0183385	-0.0208702	-0.0117016	-0.0181725	-0.0136736	-0.015825	-0.0144881	0.00066912	-0.00652412	-0.00904395	-4.73974e-06	-0.00453009	-0.00637066	0	0	0	0	0	0	0	0	0	0	0	0	0	0	0
0	0	0	0	0	0	0	0	0	0	0	0	0	-0.0116853	-0.0176502	-0.0159896	-0.0168436	-0.0105347	-0.0180756	-0.0209762	-0.0109095	-0.0187768	-0.0195371	-0.0177037	-0.0185807	-0.0122437	-0.00971134	-0.0212934	-0.0127164	0.00140716	-0.00377423	-0.00796206	-0.00363218	-0.0046831	0.00788404	0.0114829	0.00584547	0.0101774	0.026971	0.0173725	0.0273737	0.0526094	0	0	0	0	0	0	0	0
0	0	0	0	0	0	0	0	0	0	0	0	0	-0.0179152	-0.0154516	-0.0215474	-0.0212817	-0.0154953	-0.00527079	-0.0174325	-0.0197028	-0.0123918	-0.0253894	-0.029217	-0.0175695	-0.014569	-0.0142477	-0.0235956	-0.0122199	-0.00205338	-0.00782013	-0.00822921	-0.00200217	-0.014996	0.00475022	0.00845682	0.00252473	0.00903834	0.0190462	0.0172118	0.0287523	0.0316885	0.0562625	0	0	0	0	0	0	0
0	0	0	0	0	0	0	0	0	0	0	0	0	-0.014232	-0.0179296	-0.0179377	-0.018885	-0.0132123	-0.00868014	-0.0144786	-0.0201492	-0.0183799	-0.0152462	-0.0169651	-0.0124492	-0.00902365	-0.00907515	-0.0111864	-0.0124671	-0.00340626	-0.00634554	-0.00762098	-0.00136704	-0.00745142	0.00768976	0.0129356	0.00787403	0.00401911	0.016769	0.0108408	0.0367888	0.0323992	0.0502231	0	0	0	0	0	0	0
0	0	0	0	0	0	0	0	0	0	0	0	0	-0.0139097	-0.0194151	-0.0205056	-0.019924	-0.013328	-0.0137404	-0.0157968	-0.0148421	-0.0197413	-0.0220451	-0.0152903	-0.00436421	-0.0100116	-0.0159602	-0.0125299	-0.0153196	-0.00102289	-0.00670089	-0.0100482	-0.00383288	-0.0102705	0.00864813	0.00380901	-0.00374749	0.00284631	0.00959087	0.0270686	0.0216472	0.0334981	0.0492685	0.0592362	0	0	0	0	0	0
0	0	0	0	0	0	0	0	0	0	0	0	0	-0.0249887	-0.0198229	-0.0215636	-0.0142083	-0.0131557	-0.0108469	-0.010975	-0.0137072	-0.0105387	-0.0183065	-0.0151079	-0.00642649	-0.00197625	-0.00912642	-0.0177408	-0.0144129	-0.00287529	-0.0121804	-0.00882898	-0.00697574	-0.00911119	0.0027703	0.00547902	-0.00764463	-0.00155365	0.00465351	0.0294023	0.049171	0.0297238	0.0350511	0.0597919	0.0341663	0.00606274	-0.0112396	0.0332024	0.0350526	0.0121629
0	0	0	0	0	0	0	0	0	0	0	0	0	-0.0165672	-0.0141349	-0.0125588	-0.0153353	-0.0142922	-0.00790638	-0.0162427	-0.00611477	-0.0118846	-0.00723329	0.00465866	-0.00805045	-0.00916978	-0.00518648	-0.0131973	-0.0113233	-0.00675377	-0.00863092	-0.0127408	-0.00188672	-0.0129794	-0.00731311	0.0165717	0.00424336	0.0156895	0.00668642	0.0131523	0.0505023	0.0111538	0.0235885	-0.00450524	0.0346099	0	0	0	0	0
0	0	0	0	0	0	0	0	0	0	0	0	0	-0.0205656	-0.0182075	-0.00793519	-0.0170275	-0.00758081	-0.00474553	-0.0153142	-0.0156827	-0.0123516	-0.0154757	-0.00487857	0.00274101	-0.00614256	-0.00676165	-0.0109161	-0.00444539	0.00246813	-0.000537808	-0.020126	0.00537543	0.00836792	0.0349181	0.0363496	0.0201338	0.0069045	0.0019105	-0.00439092	0.0441638	-0.00280853	0.0039932	0.0677402	0	0	0	0	0	0
0	0	0	0	0	0	0	0	0	0	0	0	0	-0.0269358	-0.0168211	-0.0162275	-0.00808349	-0.0078239	-0.00848107	-0.00826602	-0.0141532	-0.00641496	-0.00902514	-0.0135915	0.0033359	-0.00369599	-0.0181637	-0.01821	-0.0133023	0.0104109	-0.00748696	0.00792532	0.0173637	0.0375228	0.0412657	0.0277716	0.00900348	0.0319977	0.0253021	0.00810914	-0.0291159	-0.0120097	-0.000438173	0.102065	0	0	0	0	0	0
0	0	0	0	0	0	0	0	0	0	0	0	0	0	-0.018708	-0.0162651	-0.0180053	-0.0112306	-0.00808989	-0.00535589	-0.0140165	-0.00467059	-0.0152127	-0.0179859	0.00406626	-0.00648657	-0.00740281	-0.013485	-0.00719081	0.00295744	-0.00506558	0.0191878	0.0228868	0.0275835	0.00525749	0.0138602	0.0269507	0.0198201	-0.0123018	-0.00424017	-0.0341685	-0.00177392	0.0580794	0.104785	0	0	0	0	0	0
0	0	0	0	0	0	0	0	0	0	0	0	0	0	0	-0.0292399	-0.0244418	-0.0248305	-0.0151256	-0.0103056	-0.00706689	-0.0111509	-0.0134778	-0.0204293	-0.0119732	0.0078115	-0.00118382	-0.0162504	-0.0171381	-0.00396543	0.00409563	0.0259256	0.0349536	0.0428999	0.0461291	0.0377086	0.00117657	-0.026345	-0.0661339	-0.00147889	0.0162908	0.00249623	0.00834025	0.0338284	0	0	0	0	0	0
0	0	0	0	0	0	0	0	0	0	0	0	0	0	0	0	0	-0.0181478	-0.0118468	-0.0114448	-0.012843	-0.00195914	-0.00780673	-0.0151284	0.000875198	0.0225057	0.0058676	0.00259844	-0.000546719	-0.000539875	-0.00902564	0.0166837	0.0379027	0.0453858	0.0478886	0.0389316	0.0184172	-0.0314761	-0.0516832	0.0489147	0.000138482	-0.0427516	0	0	0	0	0	0	0	0
0	0	0	0	0	0	0	0	0	0	0	0	0	0	0	0	0	0	0	0	-0.030496	-0.0174873	-0.0149756	-0.0106531	-0.00882331	0.0121682	0.00756683	-0.00678878	-0.00146402	0.0217388	-0.0207131	-0.0128322	0.0105887	0.0573196	0.0590399	0.0172232	0.0492531	0.0154758	0	0	0	0	0	0	0	0	0	0	0	0
0	0	0	0	0	0	0	0	0	0	0	0	0	0	0	0	0	0	0	0	0	0	0	0	0	0	0	0	0	0	0	0	0	0	0	0	0	0	0	0	0	0	0	0	0	0	0	0	0	0
0	0	0	0	0	0	0	0	0	0	0	0	0	0	0	0	0	0	0	0	0	0	0	0	0	0	0	0	0	0	0	0	0	0	0	0	0	0	0	0	0	0	0	0	0	0	0	0	0	0
0	0	0	0	0	0	0	0	0	0	0	0	0	0	0	0	0	0	0	0	0	0	0	0	0	0	0	0	0	0	0	0	0	0	0	0	0	0	0	0	0	0	0	0	0	0	0	0	0	0
0	0	0	0	0	0	0	0	0	0	0	0	0	0	0	0	0	0	0	0	0	0	0	0	0	0	0	0	0	0	0	0	0	0	0	0	0	0	0	0	0	0	0	0	0	0	0	0	0	0
0	0	0	0	0	0	0	0	0	0	0	0	0	0	0	0	0	0	0	0	0	0	0	0	0	0	0	0	0	0	0	0	0	0	0	0	0	0	0	0	0	0	0	0	0	0	0	0	0	0
0	0	0	0	0	0	0	0	0	0	0	0	0	0	0	0	0	0	0	0	0	0	0	0	0	0	0	0	0	0	0	0	0	0	0	0	0	0	0	0	0	0	0	0	0	0	0	0	0	0
0	0	0	0	0	0	0	0	0	0	0	0	0	0	0	0	0	0	0	0	0	0	0	0	0	0	0	0	0	0	0	0	0	0	0	0	0	0	0	0	0	0	0	0	0	0	0	0	0	0
0	0	0	0	0	0	0	0	0	0	0	0	0	0	0	0	0	0	0	0	0	0	0	0	0	0	0	0	0	0	0	0	0	0	0	0	0	0	0	0	0	0	0	0	0	0	0	0	0	0
0	0	0	0	0	0	0	0	0	0	0	0	0	0	0	0	0	0	0	0	0	0	0	0	0	0	0	0	0	0	0	0	0	0	0	0	0	0	0	0	0	0	0	0	0	0	0	0	0	0
0	0	0	0	0	0	0	0	0	0	0	0	0	0	0	0	0	0	0	0	0	0	0	0	0	0	0	0	0	0	0	0	0	0	0	0	0	0	0	0	0	0	0	0	0	0	0	0	0	0
0	0	0	0	0	0	0	0	0	0	0	0	0	0	0	0	0	0	0	0	0	0	0	0	0	0	0	0	0	0	0	0	0	0	0	0	0	0	0	0	0	0	0	0	0	0	0	0	0	0
0	0	0	0	0	0	0	0	0	0	0	0	0	0	0	0	0	0	0	0	0	0	0	0	0	0	0	0	0	0	0	0	0	0	0	0	0	0	0	0	0	0	0	0	0	0	0	0	0	0
0	0	0	0	0	0	0	0	0	0	0	0	0	0	0	0	0	0	0	0	0	0	0	0	0	0	0	0	0	0	0	0	0	0	0	0	0	0	0	0	0	0	0	0	0	0	0	0	0	0
0	0	0	0	0	0	0	0	0	0	0	0	0	0	0	0	0	0	0	0	0	0	0	0	0	0	0	0	0	0	0	0	0	0	0	0	0	0	0	0	0	0	0	0	0	0	0	0	0	0
0	0	0	0	0	0	0	0	0	0	0	0	0	0	0	0	0	0	0	0	0	0	0	0	0	0	0	0	0	0	0	0	0	0	0	0	0	0	0	0	0	0	0	0	0	0	0	0	0	0
0	0	0	0	0	0	0	0	0	0	0	0	0	0	0	0	0	0	0	0	0	0	0	0	0	0	0	0	0	0	0	0	0	0	0	0	0	0	0	0	0	0	0	0	0	0	0	0	0	0
0	0	0	0	0	0	0	0	0	0	0	0	0	0	0	0	0	0	0	0	0	0	0	0	0	0	0	0	0	0	0	0	0	0	0	0	0	0	0	0	0	0	0	0	0	0	0	0	0	0
0	0	0	0	0	0	0	0	0	0	0	0	0	0	0	0	0	0	0	0	0	0	0	0	0	0	0	0	0	0	0	0	0	0	0	0	0	0	0	0	0	0	0	0	0	0	0	0	0	0
0	0	0	0	0	0	0	0	0	0	0	0	0	0	0	0	0	0	0	0	0	0	0	0	0	0	0	0	0	0	0	0	0	0	0	0	0	0	0	0	0	0	0	0	0	0	0	0	0	0
0	0	0	0	0	0	0	0	0	0	0	0	0	0	0	0	0	0	0	0	0	0	0	0	0	0	0	0	0	0	0	0	0	0	0	0	0	0	0	0	0	0	0	0	0	0	0	0	0	0
0	0	0	0	0	0	0	0	0	0	0	0	0	0	0	0	0	0	0	0	0	0	0	0	0	0	0	0	0	0	0	0	0	0	0	0	-0.0019262	0.0305838	0	0	0	0	0	0	0	0	0	0	0	0
0	0	0	0	0	0	0	0	0	0	0	0	0	0	0	0	0	0	0	0	0	0	0	0	0	0	0	0	0	0	0	0	0	0	0	-0.0331257	-0.0276172	0.0043306	0.0317623	0.129055	0	0	0	0	0	0	0	0	0	0
0	0	0	0	0	0	0	0	0	0	0	0	0	0	0	0	0	0	0	0	0	0	0	0	0	0	0	0	0	0	0	0	0	0	0.0169537	-0.000952683	-0.0141327	-0.0089588	0.00743973	0.0518236	0.0753001	0	0	0	0	0	0	0	0	0
0	0	0	0	0	0	0	0	0	0	0	0	0	0	0	0	0	0	0	0	0	0	0	0	0	0	0	0	0	0	0	0	0	-0.025878	0.0195865	-0.00252366	-0.0100964	-0.0196141	0.00686956	0.0323894	0.0320094	-0.0497864	0.0356949	0.0420522	0	0	0	0	0	0
0	0	0	0	0	0	0	0	0	0	0	0	0	0	0	0	0	0	0	0	0	0	0	0	0	0	0	0	0	0	0	0.00866067	0.0182563	-0.00913904	0.0345125	0.00134105	-0.0346781	-0.042256	-0.0119643	0.0259031	0.022526	0.0316418	0.0324049	0.0531514	0.0410402	0.0350172	0	0	0	0
0	0	0	0	0	0	0	0	0	0	0	0	0	0	0	0	0	0	0	0	0	0	0	0	0	0	0	0	0	0	-0.0116638	-0.0043594	0.0020088	0.0139715	0.0273613	0.0125883	0.00570705	-0.0176486	-0.00349859	0.0250537	0.0145486	-0.0104017	0.0929494	0.0667165	0.0119851	0.00801427	0.0062188	0	0	0
0	0	0	0	0	0	0	0	0	0	0	0	0	0	0	0	0	0	0	0	0	0	0	0	0	0	0	0	0	-0.000924987	-0.000434965	-0.0116636	0.00282873	0.00599769	0.0308024	0.0122594	0.00817814	0.0192613	0.0300078	0.0474755	0.0285661	0.0368766	0.0756748	0.0628694	0.0130988	0.0026763	0.00672795	0.0176303	0	0
0	0	0	0	0	0	0	0	0	0	0	0	0	0	0	0	0	0	0	0	0	0	0	0	0	0	0	0	0	0.00617937	-0.00683256	0.00728725	0.0144338	-0.00140079	0.0140267	0.00626215	0.0229417	0.0308616	0.0304587	0.0556147	0.0421113	0.0145468	0.0877374	0.0554168	0.00476304	-0.00208185	-0.00103847	0.0101313	0	0
0	0	0	0	0	0	0	0	0	0	0	0	0	0	0	0	0	0	0	0	0	0	0	0	0	0	0	0	0.0212014	0.0097154	-0.019455	-0.0162286	-0.0166799	0.0218713	-0.0137079	0.0138636	0.0140463	0.0749251	0.0408596	0.071009	0.0151138	0.0164529	0.0725291	0.0449304	-0.00322719	-0.00381691	-0.00293711	-0.00123608	0	0
0	0	0	0	0	0	0	0	0	0	0	0	0	0	0	0	0	0	0	0	0	0	0	0	0	0	0	0.00862686	0.00117492	0.00135732	-0.0154442	-0.0258103	-0.000741286	-0.0190319	0.0453733	0.0379573	0.0158594	0.065923	0.0448513	0.0407675	0.017281	0.0294099	0.0636302	0.030558	-0.00318233	-0.00250958	-0.00596787	-0.00479134	0	0
0	0	0	0	0	0	0	0	0	0	0	0	0	0	0	0	0	0	0	0	0	0	0	0	0	0	-0.0036942	0.000653784	0.00990473	0.0145297	-0.00804165	0.00457824	0.00258344	-0.00729573	0.0321654	0.0554998	0.0257028	0.0222404	0.0622461	0.00977916	0.00360391	0.0377808	0.0485679	0.0267275	0.00278887	-0.0110678	-0.00780108	-0.0090074	0	0
0	0	0	0	0	0	0	0	0	0	0	0	0	0	0	0	0	0	0	0	0	0	0	0	0	0	-0.00352656	-0.00544256	0.00968244	0.0176934	-0.000469578	-0.00130427	-0.00253343	0.00892286	0.0248193	0.036386	0.039182	0.0253999	0.0166408	0.0252863	0.00237807	0.0166066	0.0387054	0.0332541	-0.00591096	-0.00373458	-0.00363578	-0.00534183	0	0
0	0	0	0	0	0	0	0	0	0	0	0	0	0	0	0	0	0	0	0	0	0	0	0	0	-0.00881846	0.00402065	-0.00676061	0.000892017	0.0120522	-0.00392923	-0.00833303	0.00230886	-0.000145825	0.0132578	0.0121127	0.0318333	0.00446264	0.00450345	0.0058966	0.00348413	0.015597	0.0366123	0.0258051	-0.00122182	-0.00782311	-0.00474217	-0.00890323	0	0
0	0	0	0	0	0	0	0	0	0	0	0	0	0	0	0	0	0	0	0	0	0	0	0	0	0.00641299	0.017346	-0.00246549	-0.000125995	0.0173048	0.00108064	-0.00469677	0.00546852	-0.0119461	0.0148003	0.020706	0.0190563	0.0213043	0.0196136	0.00803781	-0.00834347	0.0101053	0.0149538	0.0201824	0.00267775	-0.00747561	-0.00884212	-0.00466548	0	0
0	0	0	0	0	0	0	0	0	0	0	0	0	0	0	0	0	0	0	0	0	0	0	0	0	0.0072935	0.0239461	-0.00273209	0.000781013	0.0159781	-0.00409301	0.00245281	0.00159251	-0.0193785	0.0146038	0.0325891	0.0216371	0.018844	0.0127511	0.0080505	0.00442621	0.0140733	0.0143066	0.0151327	0.00325411	-0.000649821	0.00260188	-0.00714905	0	0
0	0	0	0	0	0	0	0	0	0	0	0	0	0	0	0	0	0	0	0	0	0	0	0	0	0.00772005	0.0187662	-0.00378269	-0.0050524	0.0132676	-0.00717308	0.00118976	-0.00235348	-0.0187912	0.0121397	0.0265988	0.00520556	0.0115977	0.00336251	0.00460637	0.0147101	0.0274807	0.0165447	0.0191848	0.0083847	-0.00438785	-0.00911177	-0.00619299	0	0
0	0	0	0	0	0	0	0	0	0	0	0	0	0	0	0	0	0	0	0	0	0	0	0	-0.0173913	-0.0140534	-0.00412901	-0.00881227	-0.00540082	-0.000689665	-0.000761109	-0.00662305	0.00422129	-0.00703113	-0.000255431	0.00223568	0.0053889	-0.000447405	-0.00525775	0.00966885	0.0194807	0.0151121	0.0133862	0.000725165	-0.00404106	-0.00861593	-0.0104808	-0.018708	0	0
0	0	0	0	0	0	0	0	0	0	0	0	0	0	0	0	0	0	0	0	0	0	0	0	-0.012998	-0.00990455	-0.00790244	-0.0152848	-0.00864535	-0.00559897	-0.00738878	-0.00950777	-0.00777376	-0.0103998	-0.00378058	-0.00548705	-0.0155166	-0.0134539	-0.00850665	0.00127881	0.00604519	0.00276576	-0.00562545	-0.00989214	-0.00972453	-0.00968759	-0.0128029	0	0	0
0	0	0	0	0	0	0	0	0	0	0	0	0	0	0	0	0	0	0	0	0	0	0	0	-0.0224128	-0.0129669	-0.016459	-0.0244772	-0.0176793	-0.010953	-0.019121	-0.0231716	-0.0148872	-0.0202247	-0.0194331	-0.0188497	-0.0252729	-0.0181558	-0.0148754	-0.0238456	-0.00935946	0.00170459	-0.0139317	-0.0159236	-0.0108626	-0.0150352	-0.0144236	0	0	0
0	0	0	0	0	0	0	0	0	0	0	0	0	0	0	0	0	0	0	0	0	0	0	0	0	-0.0146825	-0.0171545	-0.0232495	-0.018874	-0.0100875	-0.0263201	-0.0258399	-0.0158323	-0.024204	-0.0190315	-0.0174315	-0.0256051	-0.0214552	-0.0188264	-0.0158588	-0.0121121	0.00652275	-0.000800631	-0.0148122	-0.0140964	-0.015694	0	0	0	0
0	0	0	0	0	0	0	0	0	0	0	0	0	0	0	0	0	0	0	0	0	0	0	0	0	-0.0235776	-0.0192659	-0.0227954	-0.023598	-0.0190593	-0.023988	-0.0271763	-0.0236549	-0.0255065	-0.0212485	-0.0230505	-0.0265422	-0.0259466	-0.0232397	-0.0174495	-0.0131835	0.00546778	-0.0176974	-0.0270927	-0.0128519	-0.0160983	0	0	0	0
0	0	0	0	0	0	0	0	0	0	0	0	0	0	0	0	0	0	0	0	0	0	0	0	0	0	0	-0.0307967	-0.0269526	-0.0252008	-0.029131	-0.0323819	-0.0262739	-0.0359798	-0.0254514	-0.0275914	-0.0429496	-0.0475031	-0.0190101	-0.00745514	-0.0184339	-0.00017313	-0.0137192	-0.0236188	-0.0169845	0	0	0	0	0
0	0	0	0	0	0	0	0	0	0	0	0	0	0	0	0	0	0	0	0	0	0	0	0	0	0	0	0	0	-0.0271585	-0.0336239	-0.0369499	-0.0254967	-0.0407207	-0.0327466	-0.00979742	-0.0158015	-0.0171528	-0.0133709	-0.0135253	-0.0100289	0.0031173	0	0	0	0	0	0	0	0
0	0	0	0	0	0	0	0	0	0	0	0	0	0	0	0	0	0	0	0	0	0	0	0	0	0	0	0	0	0	0	-0.0278575	-0.0233282	-0.0409363	-0.0276202	-0.0212798	-0.0227057	-0.0183926	-0.0144558	0	0	0	0	0	0	0	0	0	0	0
0	0	0	0	0	0	0	0	0	0	0	0	0	0	0	0	0	0	0	0	0	0	0	0	0	0	0	0	0	0	0	0	0	0	0	0	0	0	0	0	0	0	0	0	0	0	0	0	0	0
0	0	0	0	0	0	0	0	0	0	0	0	0	0	0	0	0	0	0	0	0	0	0	0	0	0	0	0	0	0	0	0	0	0	0	0	0	0	0	0	0	0	0	0	0	0	0	0	0	0
0	0	0	0	0	0	0	0	0	0	0	0	0	0	0	0	0	0	0	0	0	0	0	0	0	0	0	0	0	0	0	0	0	0	0	0	0	0	0	0	0	0	0	0	0	0	0	0	0	0
0	0	0	0	0	0	0	0	0	0	0	0	0	0	0	0	0	0	0	0	0	0	0	0	0	0	0	0	0	0	0	0	0	0	0	0	0	0	0	0	0	0	0	0	0	0	0	0	0	0
0	0	0	0	0	0	0	0	0	0	0	0	0	0	0	0	0	0	0	0	0	0	0	0	0	0	0	0	0	0	0	0	0	0	0	0	0	0	0	0	0	0	0	0	0	0	0	0	0	0
0	0	0	0	0	0	0	0	0	0	0	0	0	0	0	0	0	0	0	0	0	0	0	0	0	0	0	0	0	0	0	0	0	0	0	0	0	0	0	0	0	0	0	0	0	0	0	0	0	0
0	0	0	0	0	0	0	0	0	0	0	0	0	0	0	0	0	0	0	0	0	0	0	0	0	0	0	0	0	0	0	0	0	0	0	0	0	0	0	0	0	0	0	0	0	0	0	0	0	0
0	0	0	0	0	0	0	0	0	0	0	0	0	0	0	0	0	0	0	0	0	0	0	0	0	0	0	0	0	0	0	0	0	0	0	0	0	0	0	0	0	0	0	0	0	0	0	0	0	0
0	0	0	0	0	0	0	0	0	0	0	0	0	0	0	0	0	0	0	0	0	0	0	0	0	0	0	0	0	0	0	0	0	0	0	0	0	0	0	0	0	0	0	0	0	0	0	0	0	0
0	0	0	0	0	0	0	0	0	0	0	0	0	0	0	0	0	0	0	0	0	0	0	0	0	0	0	0	0	0	0	0	0	0	0	0	0	0	0	0	0	0	0	0	0	0	0	0	0	0
0	0	0	0	0	0	0	0	0	0	0	0	0	0	0	0	0	0	0	0	0	0	0	0	0	0	0	0	0	0	0	0	0	0	0	0	0	0	0	0	0	0	0	0	0	0	0	0	0	0
0	0	0	0	0	0	0	0	0	0	0	0	0	0	0	0	0	0	0	0	0	0	0	0	0	0	0	0	0	0	0	0	0	0	0	0	0	0	0	0	0	0	0	0	0	0	0	0	0	0
0	0	0	0	0	0	0	0	0	0	0	0	0	0	0	0	0	0	0	0	0	0	0	0	0	0	0	0	0	0	0	0	0	0	0	0	0	0	0	0	0	0	0	0	0	0	0	0	0	0
0	0	0	0	0	0	0	0	0	0	0	0	0	0	0	0	0	0	0	0	0	0	0	0	0	0	0	0	0	0	0	0	0	0	0	0	0	0	0	0	0	0	0	0	0	0	0	0	0	0
0	0	0	0	0	0	0	0	0	0	0	0	0	0	0	0	0	0	0	0	0	0	0	0	0	0	0	0	0	0	0	0	0	0	0	0	0	0	0	0	0	0	0	0	0	0	0	0	0	0
0	0	0	0	0	0	0	0	0	0	0	0	0	0	0	0	0	0	0	0	0	0	0	0	0	0	0	0	0	0	0	0	0	0	0	0	0	0	0	0	0	0	0	0	0	0	0	0	0	0
0	0	0	0	0	0	0	0	0	0	0	0	0	0	0	0	0	0	0	0	0	0	0	0	0	0	0	0	0	0	0	0	0	0	0	0	0	0	0	0	0	0	0	0	0	0	0	0	0	0
0	0	0	0	0	0	0	0	0	0	0	0	0	0	0	0	0	0	0	0	0	0	0	0	0	0	0	0	0	0	0	0	0	0	0	0	0	0	0	0	0	0	0	0	0	0	0	0	0	0
0	0	0	0	0	0	0	0	0	0	0	0	0	0	0	0	0	0	0	0	0	0	0	0	0	0	0	0	0	0	0	0	0	0	0	0	0	0	0	0	0	0	0	0	0	0	0	0	0	0
0	0	0	0	0	0	0	0	0	0	0	0	0	0	0	0	0	0	0	0	0	0	0	0	0	0	0	0	0	0	0	0	0	0	0	0	0	0	0	0	0	0	0	0	0	0	0	0	0	0
0	0	0	0	0	0	0	0	0	0	0	0	0	0	0	0	0	0	0	0	0	0	0	0	0	0	0	0	0	0	0	0	0	0	0	0	0	0	0	0	0	0	0	0	0	0	0	0	0	0
0	0	0	0	0	0	0	0	0	0	0	0	0	0	0	0	0	0	0	0	0	0	0	0	0	0	0	0	0	0	0	0	0	0	0	0	0	0	0	0	0	0	0	0	0	0	0	0	0	0
0	0	0	0	0	0	0	0	0	0	0	0	0	0	0	0	0	0	0	0	0	0	0	0	0	0	0	-0.041648	-0.0018447	-0.015684	-0.0270361	-0.0254442	-0.0224552	-0.00331635	0	0	0	0	0	0	0	0	0	0	0	0	0	0	0	0
0	0	0	0	0	0	0	0	0	0	0	0	0	0	0	0	0	0	0	0	0	0	0	-0.501182	-0.786154	-0.50263	0.0135111	0.240649	0.150933	-0.014578	-0.0176339	0.0025854	0.0364751	0.00940186	0.0173211	-0.319579	-0.747331	0	0	0	0	0	0	0	0	0	0	0	0	0
0	0	0	0	0	0	0	0	0	0	0	0	0	0	0	0	0	0	0	0	0	-0.0365747	-0.0403676	-0.0210588	0.0041193	-0.0514263	-0.0788246	-0.106099	-0.0892926	-0.0104078	-0.0160059	-0.0795514	-0.108895	-0.0907715	-0.0498219	-0.00842817	0.0750167	0.0914384	-0.0222409	0	0	0	0	0	0	0	0	0	0	0
0	0	0	0	0	0	0	0	0	0	0	0	0	0	0	0	0	-0.0256622	-0.0223788	-0.0229704	-0.0301891	-0.0440757	-0.0476709	0.00458716	-0.0212247	-0.0613859	-0.0852093	-0.110661	-0.0887076	-0.0371801	-0.0326609	-0.0642282	-0.0907914	-0.0639455	-0.0394	-0.0266918	0.060375	0.133726	0	0	0	0	0	0	0	0	0	0	0	0
0	0	0	0	0	0	0	0	0	0	0	0	0	0	0	0	0	-0.0244767	-0.0235899	-0.0197761	-0.0302416	-0.0430678	-0.0313175	-0.000454978	-0.0266201	-0.0479988	-0.0939093	-0.12263	-0.114411	-0.0371006	0.0108333	-0.0329634	-0.122005	-0.00777709	-0.0613126	-0.0320065	0.0572997	0.107907	0	0	0	0	0	0	0	0	0	0	0	0
0	0	0	0	0	0	0	0	0	0	0	0	0	0	0	0	-0.0221957	-0.0183398	-0.00994684	-0.0216212	-0.0314846	-0.0408334	-0.0365478	-0.0476274	-0.0514695	-0.0596275	-0.0935406	-0.143586	-0.0445685	-0.0192354	0.00995667	-0.0140217	-0.120564	-0.00570287	0.00522865	-0.0467523	0.0322351	0.0944078	0	0	0	0	0	0	0	0	0	0	0	0
0	0	0	0	0	0	0	0	0	0	0	0	0	0	0	0	-0.0267243	-0.0211773	-0.0156899	-0.0232697	-0.0342064	-0.0379224	-0.0534701	-0.053929	-0.0584887	-0.0912556	-0.14669	-0.068794	-0.0519217	-0.0412691	0.0323188	-0.0586188	-0.0433139	0.0185375	-0.0558153	-0.0316482	0.0311737	0.0432824	0	0	0	0	0	0	0	0	0	0	0	0
0	0	0	0	0	0	0	0	0	0	0	0	0	0	0	0	-0.0258109	-0.0269143	-0.023141	-0.0237362	-0.0311159	-0.0408425	-0.061828	-0.0431358	-0.0769273	-0.132028	-0.0627264	-0.0407322	-0.0741451	-0.0145669	0.0308535	-0.0703484	0.00123702	0.0128261	-0.0522849	-0.0396355	0.0592507	0.000275007	0	0	0	0	0	0	0	0	0	0	0	0
0	0	0	0	0	0	0	0	0	0	0	0	0	0	0	0	-0.0187167	-0.0143839	-0.00514941	-0.0093107	-0.0165132	-0.0500765	-0.0614587	-0.0638798	-0.115981	-0.0477596	-0.0628144	-0.0739851	-0.00898609	0.0114323	-0.0544838	-0.0720523	-0.00302221	0.0131091	-0.0371133	0.00545311	0.026521	-0.0127023	0	0	0	0	0	0	0	0	0	0	0	0
0	0	0	0	0	0	0	0	0	0	0	0	0	0	0	-0.0303023	-0.021193	-0.0155684	-0.0129873	-0.0125037	-0.0234814	-0.0608288	-0.064402	-0.0699586	-0.0824281	-0.0292723	-0.0652328	-0.0563656	0.0141376	-0.0243487	-0.0673054	-0.0730664	0.0188679	0.0108148	-0.0489759	0.0179322	-0.00486711	0	0	0	0	0	0	0	0	0	0	0	0	0
0	0	0	0	0	0	0	0	0	0	0	0	0	0	0	-0.0382559	-0.0209358	-0.0153177	-0.00177553	-0.0174668	-0.0391203	-0.0795364	-0.0581711	-0.074508	-0.0398136	-0.0274289	-0.0668354	-0.0370123	-0.0205589	-0.0366229	-0.0757251	-0.0437736	0.0294368	-0.00312373	-0.01011	0.00279686	0	0	0	0	0	0	0	0	0	0	0	0	0	0
0	0	0	0	0	0	0	0	0	0	0	0	0	0	0	0	-0.0175365	-0.0135188	-0.00170056	-0.0121553	-0.0468789	-0.0849112	-0.0467106	-0.0115987	-0.0530487	-0.0353112	-0.0233302	-0.0558081	-0.0288428	-0.0785024	-0.0813498	0.053931	0.0526902	0.0149952	-0.00715478	0	0	0	0	0	0	0	0	0	0	0	0	0	0	0
0	0	0	0	0	0	0	0	0	0	0	0	0	0	0	0	0	-0.0203674	-0.00477484	-0.0105976	-0.00434306	-0.0307935	-0.0349129	-0.0302472	-0.0125114	-0.0176246	-0.0227073	-0.000912083	0.00624122	0.0134625	0.0388173	0.00568178	-0.00935175	-0.0146081	0	0	0	0	0	0	0	0	0	0	0	0	0	0	0	0
0	0	0	0	0	0	0	0	0	0	0	0	0	0	0	0	0	0	-0.0352351	-0.0152825	-0.00453869	-0.00412503	-0.0172879	-0.029403	0.000149283	-0.00696389	-0.00265037	-0.00155538	0.00395536	0.00644625	0.00284341	-0.0140914	-0.0186977	0	0	0	0	0	0	0	0	0	0	0	0	0	0	0	0	0
0	0	0	0	0	0	0	0	0	0	0	0	0	0	0	0	0	0	0	-0.0149667	-0.00985676	-0.00227042	-0.0160276	-0.0310409	-0.00270483	0.00458403	-0.00637684	-0.0242941	-0.00935369	-0.000464562	-0.00163037	-0.0196388	0	0	0	0	0	0	0	0	0	0	0	0	0	0	0	0	0	0
0	0	0	0	0	0	0	0	0	0	0	0	0	0	0	0	0	0	0	0	-0.0171649	-0.0128954	-0.0127675	-0.0232692	-0.0191783	-0.00732571	-0.0136583	-0.0211679	-0.0236903	-0.00282676	-0.00813047	0	0	0	0	0	0	0	0	0	0	0	0	0	0	0	0	0	0	0
0	0	0	0	0	0	0	0	0	0	0	0	0	0	0	0	0	0	0	0	0	0	0	-0.0171922	-0.0137073	-0.0142656	-0.0160355	-0.0244839	-0.01576	0	0	0	0	0	0	0	0	0	0	0	0	0	0	0	0	0	0	0	0	0
0	0	0	0	0	0	0	0	0	0	0	0	0	0	0	0	0	0	0	0	0	0	0	0	0	0	0	0	0	0	0	0	0	0	0	0	0	0	0	0	0	0	0	0	0	0	0	0	0	0
0	0	0	0	0	0	0	0	0	0	0	0	0	0	0	0	0	0	0	0	0	0	0	0	0	0	0	0	0	0	0	0	0	0	0	0	0	0	0	0	0	0	0	0	0	0	0	0	0	0
0	0	0	0	0	0	0	0	0	0	0	0	0	0	0	0	0	0	0	0	0	0	0	0	0	0	0	0	0	0	0	0	0	0	0	0	0	0	0	0	0	0	0	0	0	0	0	0	0	0
0	0	0	0	0	0	0	0	0	0	0	0	0	0	0	0	0	0	0	0	0	0	0	0	0	0	0	0	0	0	0	0	0	0	0	0	0	0	0	0	0	0	0	0	0	0	0	0	0	0
0	0	0	0	0	0	0	0	0	0	0	0	0	0	0	0	0	0	0	0	0	0	0	0	0	0	0	0	0	0	0	0	0	0	0	0	0	0	0	0	0	0	0	0	0	0	0	0	0	0
0	0	0	0	0	0	0	0	0	0	0	0	0	0	0	0	0	0	0	0	0	0	0	0	0	0	0	0	0	0	0	0	0	0	0	0	0	0	0	0	0	0	0	0	0	0	0	0	0	0
0	0	0	0	0	0	0	0	0	0	0	0	0	0	0	0	0	0	0	0	0	0	0	0	0	0	0	0	0	0	0	0	0	0	0	0	0	0	0	0	0	0	0	0	0	0	0	0	0	0
0	0	0	0	0	0	0	0	0	0	0	0	0	0	0	0	0	0	0	0	0	0	0	0	0	0	0	0	0	0	0	0	0	0	0	0	0	0	0	0	0	0	0	0	0	0	0	0	0	0
0	0	0	0	0	0	0	0	0	0	0	0	0	0	0	0	0	0	0	0	0	0	0	0	0	0	0	0	0	0	0	0	0	0	0	0	0	0	0	0	0	0	0	0	0	0	0	0	0	0
0	0	0	0	0	0	0	0	0	0	0	0	0	0	0	0	0	0	0	0	0	0	0	0	0	0	0	0	0	0	0	0	0	0	0	0	0	0	0	0	0	0	0	0	0	0	0	0	0	0
0	0	0	0	0	0	0	0	0	0	0	0	0	0	0	0	0	0	0	0	0	0	0	0	0	0	0	0	0	0	0	0	0	0	0	0	0	0	0	0	0	0	0	0	0	0	0	0	0	0
0	0	0	0	0	0	0	0	0	0	0	0	0	0	0	0	0	0	0	0	0	0	0	0	0	0	0	0	0	0	0	0	0	0	0	0	0	0	0	0	0	0	0	0	0	0	0	0	0	0
0	0	0	0	0	0	0	0	0	0	0	0	0	0	0	0	0	0	0	0	0	0	0	0	0	0	0	0	0	0	0	0	0	0	0	0	0	0	0	0	0	0	0	0	0	0	0	0	0	0
0	0	0	0	0	0	0	0	0	0	0	0	0	0	0	0	0	0	0	0	0	0	0	0	0	0	0	0	0	0	0	0	0	0	0	0	0	0	0	0	0	0	0	0	0	0	0	0	0	0
0	0	0	0	0	0	0	0	0	0	0	0	0	0	0	0	0	0	0	0	0	0	0	0	0	0	0	0	0	0	0	0	0	0	0	0	0	0	0	0	0	0	0	0	0	0	0	0	0	0
0	0	0	0	0	0	0	0	0	0	0	0	0	0	0	0	0	0	0	0	0	0	0	0	0	0	0	0	0	0	0	0	0	0	0	0	0	0	0	0	0	0	0	0	0	0	0	0	0	0
0	0	0	0	0	0	0	0	0	0	0	0	0	0	0	0	0	0	0	0	0	0	0	0	0	0	0	0	0	0	0	0	0	0	0	0	0	0	0	0	0	0	0	0	0	0	0	0	0	0
0	0	0	0	0	0	0	0	0	0	0	0	0	0	0	0	0	0	0	0	0	0	0	0	0	0	0	0	0	0	0	0	0	0	0	0	0	0	0	0	0	0	0	0	0	0	0	0	0	0
0	0	0	0	0	0	0	0	0	0	0	0	0	0	0	0	0	0	0	0	0	0	0	0	0	0	0	0	0	0	0	0	0	0	0	0	0	0	0	0	0	0	0	0	0	0	0	0	0	0
0	0	0	0	0	0	0	0	0	0	0	0	0	0	0	0	0	0	0	0	0	0	0	0	0	0	0	0	0	0	0	0	0	0	0	0	0	0	0	0	0	0	0	0	0	0	0	0	0	0
0	0	0	0	0	0	0	0	0	0	0	0	0	0	0	0	0	0	0	0	0	0	0	0	0	0	0	0	0	0	0	0	0	0	0	0	0	0	0	0	0	0	0	0	0	0	0	0	0	0
0	0	0	0	0	0	0	0	0	0	0	0	0	0	0	0	0	0	0	0	0	0	0	0	0	0	0	0	0	0	0	0	0	0	0	0	0	0	0	0	0	0	0	0	0	0	0	0	0	0
0	0	0	0	0	0	0	0	0	0	0	0	0	0	0	0	0	0	0	0	0	0	0	0	0	0	0	0	0	0	0	0	0	0	0	0	0	0	0	0	0	0	0	0	0	0	0	0	0	0
0	0	0	0	0	0	0	0	0	0	0	0	0	0	0	0	0	0	0	0	0	0	0	0	0	0	0	0	0	0	0	0	0	0	0	0	0	0	0	0	0	0	0	0	0	0	0	0	0	0
0	0	0	0	0	0	0	0	0	0	0	0	0	0	0	0	0	0	0	0	0	0	0	0	0	0	0	0	0	0	0	0	0	0	0	0	0	0	0	0	0	0	0	0	0	0	0	0	0	0
0	0	0	0	0	0	0	0	0	0	0	0	0	0	0	0	0	0	0	0	0	0	0	0	0	0	0	0	0	0	0	0	0	0	0	0	0	0	0	0	0	0	0	0	0	0	0	0	0	0
0	0	0	0	0	0	0	0	0	0	0	0	0	0	0	0	0	0	0	0	0	0	0	0	0	0	0	0	0	0	0	0	0	0	0	0	0	0	0	0	0	0	0	0	0	0	0	0	0	0
0	0	0	0	0	0	0	0	0	0	0	0	0	0	0	0	0	0	0	0	0	0	0	0	0	0	0	0	0	0	0	0	0	0	0	0	0	0	0	0	0	0	0	0	0	0	0	0	0	0
0	0	0	0	0	0	0	0	0	0	0	0	0	0	0	0	0	0	0	0	0	0	0	0	0	0	0	0	0	0	0	0	0	0	0	0	0	0	0	0	0	0	0	0	0	0	0	0	0	0
0	0	0	0	0	0	0	0	0	0	0	0	0	0	0	0	0	0	0	0	0	0	0	0	0	0	0	0	0	0	0	0	0	0	0	0	0	0	0	0	0	0	0	0	0	0	0	0	0	0
0	0	0	0	0	0	0	0	0	0	0	0	0	0	0	0	0	0	0	0	0	0	0	0	0	0	0	0	0	0	0	0	0	0	0	0	0	0	0	0	0	0	0	0	0	0	0	0	0	0
0	0	0	0	0	0	0	0	0	0	0	0	0	0	0	0	0	0	0	0	0	0	0	0	0	0	0	0	0	0	0	0	0	0	0	0	0	0	0	0	0	0	0	0	0	0	0	0	0	0
0	0	0	0	0	0	0	0	0	0	0	0	0	0	0	0	0	0	0	0	0	0	0	0	0	0	0	0.0555467	0.115751	0.0063585	-0.0817204	0	0	0	0	0	0	0	0	0	0	0	0	0	0	0	0	0	0	0
0	0	0	0	0	0	0	0	0	0	0	0	0	0	0	0	0	0	0	0	0	0	0	0	-0.00242234	0.0158626	0.00241297	0.0146417	0.049035	-0.0017875	0.0231404	0	0	0	0	0	0	0	0	0	0	0	0	0	0	0	0	0	0	0
0	0	0	0	0	0	0	0	0	0	0	0	0	0	0	0	0	0	0	-0.0356258	-0.0370303	-0.0349734	-0.0273457	-0.0289464	-0.0213249	0.00962612	0.0193508	0.0257522	0.0605608	0.0190033	0.0331434	0	0	0	0	0	0	0	0	0	0	0	0	0	0	0	0	0	0	0
0	0	0	0	0	0	0	0	0	0	0	0	0	0	0	0	0	-0.0575127	-0.0419906	-0.0311646	-0.0487935	-0.0789744	-0.071321	-0.0323777	0.00511416	-0.033742	-0.012538	-0.000681918	0.0400031	0.0697868	0.0174215	0	0	0	0	0	0	0	0	0	0	0	0	0	0	0	0	0	0	0
0	0	0	0	0	0	0	0	0	0	0	0	0	0	0	0	-0.0875339	-0.00950545	-0.0299195	-0.0243696	-0.0623995	-0.0741011	-0.0678376	-0.0510822	0.00832742	0.0135598	-0.0188747	-0.0357078	0.0242055	0.0659379	0.000147863	0.0376315	0	0	0	0	0	0	0	0	0	0	0	0	0	0	0	0	0	0
0	0	0	0	0	0	0	0	0	0	0	0	0	0	0	0	-0.0420281	-0.0200576	-0.0385604	-0.0311667	-0.0739348	-0.0741537	-0.0652017	-0.0583755	0.00662006	0.0281723	-0.0136991	-0.0369887	0.0378904	0.056212	0.00343695	0.0224683	0	0	0	0	0	0	0	0	0	0	0	0	0	0	0	0	0	0
0	0	0	0	0	0	0	0	0	0	0	0	0	0	0	-0.0729898	-0.0326844	-0.0338837	-0.0349353	-0.0382711	-0.0598193	-0.0619048	-0.053028	-0.0287377	0.0014033	0.0216665	-0.00474245	-0.0308643	0.0540662	0.0334523	-0.00357902	0.0185741	0	0	0	0	0	0	0	0	0	0	0	0	0	0	0	0	0	0
0	0	0	0	0	0	0	0	0	0	0	0	0	0	0	-0.0405812	-0.0317727	-0.0439764	-0.0166785	-0.0290617	-0.0521153	-0.0350894	-0.049798	0.00419232	0.0148661	-0.00516125	-0.0177556	-0.0238437	0.0678935	0.027944	-0.00476297	0.0191339	0	0	0	0	0	0	0	0	0	0	0	0	0	0	0	0	0	0
0	0	0	0	0	0	0	0	0	0	0	0	0	0	-0.0722076	-0.0211206	-0.0350486	-0.035748	-0.0424163	-0.0505301	-0.0183172	-0.0170351	-0.035721	0.0117514	0.00379148	-0.0570118	-0.0164667	0.0186652	0.0597338	0.0142127	-0.0297438	-0.00105409	0	0	0	0	0	0	0	0	0	0	0	0	0	0	0	0	0	0
0	0	0	0	0	0	0	0	0	0	0	0	0	-0.49684	-0.25355	-0.184348	-0.420942	-0.5911	-0.452941	-0.230971	-0.191137	-0.289858	-0.130847	0.0362	0.103414	-0.061894	-0.175644	0.099919	0.230707	0.109802	0.0104487	0.0681405	0	0	0	0	0	0	0	0	0	0	0	0	0	0	0	0	0	0
0	0	0	0	0	0	0	0	0	0	0	0	-0.0922476	-0.0756143	0.0357721	-0.0504195	-0.0896845	-0.0357197	0.00131478	-0.0231542	0.00247399	-0.00320811	-0.00473894	-0.0137485	-0.0522894	-0.102233	0.118165	0.0342772	0.0128705	-0.0110137	-0.0239348	-0.00908584	0	0	0	0	0	0	0	0	0	0	0	0	0	0	0	0	0	0
0	0	0	0	0	0	0	0	0	0	0	-0.0399736	-0.0545192	-0.0672454	-0.0354797	-0.0535707	-0.0711918	-0.0537972	-0.000899471	-0.00340989	-0.00598778	0.00939431	0.00224542	-0.0183082	-0.0119099	0.0489006	0.0131825	0.0146518	0.00916199	-0.00440631	-0.0188693	-0.0107086	0	0	0	0	0	0	0	0	0	0	0	0	0	0	0	0	0	0
0	0	0	0	0	0	0	0	0	0	0	-0.0353132	-0.0440697	-0.0638269	-0.0503826	-0.0350089	-0.0462786	-0.0460945	-0.0144689	0.00213724	0.00190385	0.0131577	0.00993756	-0.0213161	-0.00983942	0.0497587	0.0139169	0.0103833	0.00633409	-0.00701802	-0.0216905	-0.0166287	0	0	0	0	0	0	0	0	0	0	0	0	0	0	0	0	0	0
0	0	0	0	0	0	0	0	0	0	0	-0.0327829	-0.0395834	-0.0718083	-0.0637193	-0.00593982	-0.042161	-0.00800394	-0.021855	-0.0141166	0.00770445	0.017686	0.0149383	-0.0249709	0.0161098	0.0381671	0.0231511	0.0123399	0.00168057	-0.00456005	-0.0163663	-0.0175508	0	0	0	0	0	0	0	0	0	0	0	0	0	0	0	0	0	0
0	0	0	0	0	0	0	0	0	0	0	-0.0297519	-0.0499158	-0.102167	-0.0918712	-0.00472152	0.000663245	-0.0375177	0.0159137	0.00507313	0.0153288	0.016049	-0.0131186	-0.0150803	0.0412043	0.00218124	0.0147888	0.00466325	-0.0122667	0.000867334	-0.017866	-0.0148161	0	0	0	0	0	0	0	0	0	0	0	0	0	0	0	0	0	0
0	0	0	0	0	0	0	0	0	0	0	-0.0389864	-0.0585863	-0.13339	-0.0654672	-0.0131667	0.0260235	0.0199238	0.0233369	0.0282301	0.0243544	-0.0103135	0.0148233	0.0200968	-0.00104883	-0.00564365	-0.00684366	-0.0171417	-0.0197035	-0.00498301	-0.0202487	-0.024112	0	0	0	0	0	0	0	0	0	0	0	0	0	0	0	0	0	0
0	0	0	0	0	0	0	0	0	0	0	-0.10463	-0.042267	0.0366748	0.329037	0.819194	1.22357	1.30047	0.996168	0.669553	0.414982	0.238289	0.17202	0.0941917	0.0599633	0.0423168	0.0447412	0.0412969	0.0539866	0.0604108	0.0588763	0.0543238	0	0	0	0	0	0	0	0	0	0	0	0	0	0	0	0	0	0
0	0	0	0	0	0	0	0	0	0	0	-0.0377392	-0.0255762	-0.0251669	-0.0240939	-0.0270308	-0.0269556	-0.0404061	-0.042986	-0.0397863	-0.0318744	-0.0291662	-0.0145008	-0.00299935	-0.015936	-0.0183552	-0.0156455	-0.0201786	-0.021026	-0.019154	-0.0154863	0	0	0	0	0	0	0	0	0	0	0	0	0	0	0	0	0	0	0
0	0	0	0	0	0	0	0	0	0	0	0	-0.0273344	-0.0271534	-0.00850385	-0.0149069	-0.0260452	-0.0333141	-0.034928	-0.0282784	-0.0284169	-0.0212599	-0.0157824	0.00842132	-0.0116138	-0.0143342	-0.0124388	-0.0143846	-0.0158656	-0.0103458	0	0	0	0	0	0	0	0	0	0	0	0	0	0	0	0	0	0	0	0
0	0	0	0	0	0	0	0	0	0	0	0	-0.0298594	-0.0296703	-0.0128423	0.00649662	-0.024938	-0.0319185	-0.0315277	-0.0352894	-0.0261132	-0.017569	-0.0105082	0.00641388	-0.00790334	-0.00898536	-0.0103811	-0.0132307	-0.016927	-0.00744298	0	0	0	0	0	0	0	0	0	0	0	0	0	0	0	0	0	0	0	0
0	0	0	0	0	0	0	0	0	0	0	0	-0.0352133	-0.020456	-0.019726	-0.00296007	-0.0156355	-0.0160188	-0.0361451	-0.0319806	-0.0150496	0.00612455	0.0105171	0.0141977	-0.00331055	-0.0052174	-0.0164278	-0.0167342	-0.0196886	0	0	0	0	0	0	0	0	0	0	0	0	0	0	0	0	0	0	0	0	0
0	0	0	0	0	0	0	0	0	0	0	0	0	0	-0.0170152	-0.0272391	-0.0210228	-0.0117057	-0.0235932	-0.0125825	0.0174967	0.0186185	0.00993337	0.0225631	-0.00460454	-0.0125182	-0.0141001	0	0	0	0	0	0	0	0	0	0	0	0	0	0	0	0	0	0	0	0	0	0	0
0	0	0	0	0	0	0	0	0	0	0	0	0	0	0	0	0	-0.0148576	-0.00928367	-0.00484235	-0.000577241	0.0090988	0.00420219	0.0100792	0	0	0	0	0	0	0	0	0	0	0	0	0	0	0	0	0	0	0	0	0	0	0	0	0	0
0	0	0	0	0	0	0	0	0	0	0	0	0	0	0	0	0	0	0	0	0	0	0	0	0	0	0	0	0	0	0	0	0	0	0	0	0	0	0	0	0	0	0	0	0	0	0	0	0	0
0	0	0	0	0	0	0	0	0	0	0	0	0	0	0	0	0	0	0	0	0	0	0	0	0	0	0	0	0	0	0	0	0	0	0	0	0	0	0	0	0	0	0	0	0	0	0	0	0	0
0	0	0	0	0	0	0	0	0	0	0	0	0	0	0	0	0	0	0	0	0	0	0	0	0	0	0	0	0	0	0	0	0	0	0	0	0	0	0	0	0	0	0	0	0	0	0	0	0	0
0	0	0	0	0	0	0	0	0	0	0	0	0	0	0	0	0	0	0	0	0	0	0	0	0	0	0	0	0	0	0	0	0	0	0	0	0	0	0	0	0	0	0	0	0	0	0	0	0	0
0	0	0	0	0	0	0	0	0	0	0	0	0	0	0	0	0	0	0	0	0	0	0	0	0	0	0	0	0	0	0	0	0	0	0	0	0	0	0	0	0	0	0	0	0	0	0	0	0	0
0	0	0	0	0	0	0	0	0	0	0	0	0	0	0	0	0	0	0	0	0	0	0	0	0	0	0	0	0	0	0	0	0	0	0	0	0	0	0	0	0	0	0	0	0	0	0	0	0	0
0	0	0	0	0	0	0	0	0	0	0	0	0	0	0	0	0	0	0	0	0	0	0	0	0	0	0	0	0	0	0	0	0	0	0	0	0	0	0	0	0	0	0	0	0	0	0	0	0	0
0	0	0	0	0	0	0	0	0	0	0	0	0	0	0	0	0	0	0	0	0	0	0	0	0	0	0	0	0	0	0	0	0	0	0	0	0	0	0	0	0	0	0	0	0	0	0	0	0	0
0	0	0	0	0	0	0	0	0	0	0	0	0	0	0	0	0	0	0	0	0	0	0	0	0	0	0	0	0	0	0	0	0	0	0	0	0	0	0	0	0	0	0	0	0	0	0	0	0	0
0	0	0	0	0	0	0	0	0	0	0	0	0	0	0	0	0	0	0	0	0	0	0	0	0	0	0	0	0	0	0	0	0	0	0	0	0	0	0	0	0	0	0	0	0	0	0	0	0	0
0	0	0	0	0	0	0	0	0	0	0	0	0	0	0	0	0	0	0	0	0	0	0	0	0	0	0	0	0	0	0	0	0	0	0	0	0	0	0	0	0	0	0	0	0	0	0	0	0	0
0	0	0	0	0	0	0	0	0	0	0	0	0	0	0	0	0	0	0	0	0	0	0	0	0	0	0	0	0	0	0	0	0	0	0	0	0	0	0	0	0	0	0	0	0	0	0	0	0	0
0	0	0	0	0	0	0	0	0	0	0	0	0	0	0	0	0	0	0	0	0	0	0	0	0	0	0	0	0	0	0	0	0	0	0	0	0	0	0	0	0	0	0	0	0	0	0	0	0	0
0	0	0	0	0	0	0	0	0	0	0	0	0	0	0	0	0	0	0	0	0	0	0	0	0	0	0	0	0	0	0	0	0	0	0	0	0	0	0	0	0	0	0	0	0	0	0	0	0	0
0	0	0	0	0	0	0	0	0	0	0	0	0	0	0	0	0	0	0	0	0	0	0	0	0	0	0	0	0	0	0	0	0	0	0	0	0	0	0	0	0	0	0	0	0	0	0	0	0	0
0	0	0	0	0	0	0	0	0	0	0	0	0	0	0	0	0	0	0	0	0	0	0	0	0	0	0	0	0	0	0	0	0	0	0	0	0	0	0	0	0	0	0	0	0	0	0	0	0	0
0	0	0	0	0	0	0	0	0	0	0	0	0	0	0	0	0	0	0	0	0	0	0	0	0	0	0	0	0	0	0	0	0	0	0	0	0	0	0	0	0	0	0	0	0	0	0	0	0	0
0	0	0	0	0	0	0	0	0	0	0	0	0	0	0	0	0	0	0	0	0	0	0	0	0	0	0	0	0	0	0	0	0	0	0	0	0	0	0	0	0	0	0	0	0	0	0	0	0	0
0	0	0	0	0	0	0	0	0	0	0	0	0	0	0	0	0	0	0	0	0	0	0	0	0	0	0	0	0	0	0	0	0	0	0	0	0	0	0	0	0	0	0	0	0	0	0	0	0	0
0	0	0	0	0	0	0	0	0	0	0	0	0	0	0	0	0	0	0	0	0	0	0	0	0	0	0	0	0	0	0	0	0	0	0	0	0	0	0	0	0	0	0	0	0	0	0	0	0	0
0	0	0	0	0	0	0	0	0	0	0	0	0	0	0	0	0	0	0	0	0	0	0	0	0	0	0	0	0	0	0	0	0	0	0	0	0	0	0	0	0	0	0	0	0	0	0	0	0	0
0	0	0	0	0	0	0	0	0	0	0	0	0	0	0	0	0	0	0	0	0	0	0	0	0	0	0	0	0	0	0	0	0	0	0	0	0	0	0	0	0	0	0	0	0	0	0	0	0	0
0	0	0	0	0	0	0	0	0	0	0	0	0	0	0	0	0	0	0	0	0	0	0	0	0	0	0	0	0	0	0	0	0	0	0	0	0	0	0	0	0	0	0	0	0	0	0	0	0	0
0	0	0	0	0	0	0	0	0	0	0	0	0	0	0	0	0	0	0	0	0	0	0	0	0	0	0	0	0	0	0	0	0	0	0	0	0	0	0	0	0	0	0	0	0	0	0	0	0	0
0	0	0	0	0	0	0	0	0	0	0	0	0	0	0	0	0	0	0	0	0	0	0	0	0	0	0	0	0	0	0	0	0	0	0	0	0	0	0	0	0	0	0	0	0	0	0	0	0	0
0	0	0	0	0	0	0	0	0	0	0	0	0	0	0	0	0	0	0	0	0	0	0	0	0	0	0	0	0	0	0	0	0	0	0	0	0	0	0	0	0	0	0	0	0	0	0	0	0	0
0	0	0	0	0	0	0	0	0	0	0	0	0	0	0	0	0	0	0	0	0	0	0	0	0	0	0	0	0	0	0	0	0	0	0	0	0	0	0	0	0	0	0	0	0	0	0	0	0	0
0	0	0	0	0	0	0	0	0	0	0	0	0	0	0	0	0	0	0	0	0	0	0	0	0	0	0	0	0	0	0	0	0	0	0	0	0	0	0	0	0	0	0	0	0	0	0	0	0	0
0	0	0	0	0	0	0	0	0	0	0	0	0	0	0	0	0	0	0	0	0	0	0	0	0	0	0	0	0	0	0	0	0	0	0	0	0	0	0	0	0	0	0	0	0	0	0	0	0	0
0	0	0	0	0	0	0	0	0	0	0	0	0	0	0	0	0	0	-0.0989009	0.00663441	0.0582164	0.032627	0.0705764	0	0	0	0	0	0	0	0	0	0	0	0	0	0	0	0	0	0	0	0	0	0	0	0	0	0	0
0	0	0	0	0	0	0	0	0	0	0	0	0	0	0	0	0	0	-0.0523117	-0.0222576	0.0103816	0.00566932	0.0745816	0	0	0	0	0	0	0	0	0	0	0	0	0	0	0	0	0	0	0	0	0	0	0	0	0	0	0
0	0	0	0	0	0	0	0	0	0	0	0	0	0	0	0	0	-0.0190098	-0.03189	-0.0406256	-0.00753112	0.00847071	0.0837592	0	0	0	0	0	0	0	0	0	0	0	0	0	0	0	0	0	0	0	0	0	0	0	0	0	0	0
0	0	0	0	0	0	0	0	0	0	0	0	0	0	0	0	0.00548264	-0.0551883	-0.00947988	-0.042437	-0.0266766	0.00223788	0.05388	0.0992193	0	0	0	0	0	0	0	0	0	0	0	0	0	0	0	0	0	0	0	0	0	0	0	0	0	0
0	0	0	0	0	0	0	0	0	0	0	0	0	0	0	0	0.0458902	-0.0656485	-0.003373	-0.0500518	-0.0531702	-0.0133063	0.0230661	0.0773655	0.117856	0	0	0	0	0	0	0	0	0	0	0	0	0	0	0	0	0	0	0	0	0	0	0	0	0
0	0	0	0	0	0	0	0	0	0	0	0	0	0	0	0.0620335	-0.0527058	-0.0268954	0.0135595	-0.0372382	-0.0597279	-0.0121552	0.0388717	0.0837971	0.0814201	0.0888256	0	0	0	0	0	0	0	0	0	0	0	0	0	0	0	0	0	0	0	0	0	0	0	0
0	0	0	0	0	0	0	0	0	0	0	0	0	0	-0.0272556	0.0375096	-0.0901064	-0.0310436	0.0241863	0.00570597	-0.0039321	0.000563884	0.0461315	0.068968	0.043541	0.0364973	0.0579537	0	0	0	0	0	0	0	0	0	0	0	0	0	0	0	0	0	0	0	0	0	0	0
0	0	0	0	0	0	0	0	0	0	0	0	0	-0.0511576	0.00489894	0.0169647	-0.0766021	-0.0589357	-0.0344613	0.00875656	0.0312223	0.0222969	0.0159162	0.000449564	0.0343107	0.092405	0.0546881	0	0	0	0	0	0	0	0	0	0	0	0	0	0	0	0	0	0	0	0	0	0	0
0	0	0	0	0	0	0	0	0	0	0	0	-0.0734602	-0.0141951	-0.0348054	0.0323359	-0.0524967	-0.0803494	-0.0821013	0.00317315	0.0389995	0.0284409	0.0358223	0.0333846	0.0187368	0.0312375	0.0591769	0.0389678	0	0	0	0	0	0	0	0	0	0	0	0	0	0	0	0	0	0	0	0	0	0
0	0	0	0	0	0	0	0	0	0	0	0	-0.0406562	-0.00790467	-0.0367036	0.0238643	-0.0576332	-0.084107	-0.0893018	0.000309607	0.0182718	0.0295152	0.038211	0.0390007	0.0185097	0.00242572	0.0480863	0.0401701	0	0	0	0	0	0	0	0	0	0	0	0	0	0	0	0	0	0	0	0	0	0
0	0	0	0	0	0	0	0	0	0	0	0	-0.0223246	-0.0270932	-0.0285721	0.031458	-0.0454824	-0.0820765	-0.0469419	-0.0344354	-0.0155637	0.0170409	0.0364324	0.0542259	0.00379738	0.00869485	0.0279172	0.0273799	0	0	0	0	0	0	0	0	0	0	0	0	0	0	0	0	0	0	0	0	0	0
0	0	0	0	0	0	0	0	0	0	0	0	0.0253565	0.058238	0.0417579	0.0809191	-0.0201923	-0.0716929	-0.0273783	-0.0120618	0.00455756	0.016292	0.029025	0.0398553	0.00682303	0.048495	0.0506529	0.028163	0.0271659	0	0	0	0	0	0	0	0	0	0	0	0	0	0	0	0	0	0	0	0	0
0	0	0	0	0	0	0	0	0	0	0	-0.0322029	-0.00621834	-0.0196833	0.00527463	0.0103006	-0.0472892	-0.0621362	-0.0299636	-0.0512623	-0.0238238	0.00911719	0.0203199	0.0126221	0.0244198	0.0116782	0.0106319	-7.90701e-05	0.0092695	0	0	0	0	0	0	0	0	0	0	0	0	0	0	0	0	0	0	0	0	0
0	0	0	0	0	0	0	0	0	0	0	-0.0176026	-0.0118027	-0.00973513	0.0501724	0.00868763	-0.0257937	-0.0291636	-0.0169365	-0.0144183	0.00335972	0.013652	0.0231727	0.0194306	0.02385	0.0149381	0.0120171	0.00204365	0.00156547	0	0	0	0	0	0	0	0	0	0	0	0	0	0	0	0	0	0	0	0	0
0	0	0	0	0	0	0	0	0	0	0	0	0.019645	0.000679758	0.0229286	0.00915338	-0.0253847	-0.0342246	-0.0337115	-0.0379222	-0.0355696	-0.0285541	-0.0219034	-0.0217347	-0.0191865	-0.0157055	-0.0182394	-0.0209182	-0.00886202	0	0	0	0	0	0	0	0	0	0	0	0	0	0	0	0	0	0	0	0	0
0	0	0	0	0	0	0	0	0	0	0	0.0158358	0.016162	-0.00781499	0.0151284	-0.0204538	-0.0381801	-0.0425611	-0.050617	-0.0422024	-0.0369965	-0.0376328	-0.0283667	-0.0198578	-0.0112185	-0.0102516	-0.0164744	-0.0178586	0	0	0	0	0	0	0	0	0	0	0	0	0	0	0	0	0	0	0	0	0	0
0	0	0	0	0	0	0	0	0	0	0	0	-0.00968783	-0.0100435	-0.0157928	-0.0360431	-0.0472234	-0.0494205	-0.0465457	-0.0406379	-0.0241289	-0.0212007	-0.0235437	-0.0231666	-0.0225604	-0.0230123	-0.0189999	-0.00732669	0	0	0	0	0	0	0	0	0	0	0	0	0	0	0	0	0	0	0	0	0	0
0	0	0	0	0	0	0	0	0	0	0	0	-0.0286344	-0.0203746	-0.0242451	-0.0359278	-0.0511555	-0.0630896	-0.0646442	-0.032713	-0.00950623	-0.00966912	-0.0164806	-0.0236904	-0.0154791	-0.0185419	-0.0100938	0	0	0	0	0	0	0	0	0	0	0	0	0	0	0	0	0	0	0	0	0	0	0
0	0	0	0	0	0	0	0	0	0	0	0	-0.0319563	-0.0253615	-0.029672	-0.0379268	-0.0364513	-0.0537131	-0.0476704	-0.0293889	-0.0131099	-0.00884284	-0.0143229	-0.0133383	-0.0178569	-0.017345	0	0	0	0	0	0	0	0	0	0	0	0	0	0	0	0	0	0	0	0	0	0	0	0
0	0	0	0	0	0	0	0	0	0	0	0	-0.0500742	-0.0302799	-0.0233145	-0.0277172	-0.026233	-0.0322434	-0.0336495	-0.0233791	-0.0168432	-0.0169772	-0.0148157	-0.0159394	-0.0151007	-0.00292066	0	0	0	0	0	0	0	0	0	0	0	0	0	0	0	0	0	0	0	0	0	0	0	0
0	0	0	0	0	0	0	0	0	0	0	0	-0.0437609	-0.0286789	-0.0241226	-0.022987	-0.0215284	-0.0140857	-0.0163523	-0.0238993	-0.0219945	-0.0178311	-0.0192649	-0.0153588	0	0	0	0	0	0	0	0	0	0	0	0	0	0	0	0	0	0	0	0	0	0	0	0	0	0
0	0	0	0	0	0	0	0	0	0	0	0	0	0	0	0	0	0	0	0	0	0	0	0	0	0	0	0	0	0	0	0	0	0	0	0	0	0	0	0	0	0	0	0	0	0	0	0	0	0
0	0	0	0	0	0	0	0	0	0	0	0	0	0	0	0	0	0	0	0	0	0	0	0	0	0	0	0	0	0	0	0	0	0	0	0	0	0	0	0	0	0	0	0	0	0	0	0	0	0
0	0	0	0	0	0	0	0	0	0	0	0	0	0	0	0	0	0	0	0	0	0	0	0	0	0	0	0	0	0	0	0	0	0	0	0	0	0	0	0	0	0	0	0	0	0	0	0	0	0
0	0	0	0	0	0	0	0	0	0	0	0	0	0	0	0	0	0	0	0	0	0	0	0	0	0	0	0	0	0	0	0	0	0	0	0	0	0	0	0	0	0	0	0	0	0	0	0	0	0
0	0	0	0	0	0	0	0	0	0	0	0	0	0	0	0	0	0	0	0	0	0	0	0	0	0	0	0	0	0	0	0	0	0	0	0	0	0	0	0	0	0	0	0	0	0	0	0	0	0
0	0	0	0	0	0	0	0	0	0	0	0	0	0	0	0	0	0	0	0	0	0	0	0	0	0	0	0	0	0	0	0	0	0	0	0	0	0	0	0	0	0	0	0	0	0	0	0	0	0
0	0	0	0	0	0	0	0	0	0	0	0	0	0	0	0	0	0	0	0	0	0	0	0	0	0	0	0	0	0	0	0	0	0	0	0	0	0	0	0	0	0	0	0	0	0	0	0	0	0
0	0	0	0	0	0	0	0	0	0	0	0	0	0	0	0	0	0	0	0	0	0	0	0	0	0	0	0	0	0	0	0	0	0	0	0	0	0	0	0	0	0	0	0	0	0	0	0	0	0
0	0	0	0	0	0	0	0	0	0	0	0	0	0	0	0	0	0	0	0	0	0	0	0	0	0	0	0	0	0	0	0	0	0	0	0	0	0	0	0	0	0	0	0	0	0	0	0	0	0
0	0	0	0	0	0	0	0	0	0	0	0	0	0	0	0	0	0	0	0	0	0	0	0	0	0	0	0	0	0	0	0	0	0	0	0	0	0	0	0	0	0	0	0	0	0	0	0	0	0
0	0	0	0	0	0	0	0	0	0	0	0	0	0	0	0	0	0	0	0	0	0	0	0	0	0	0	0	0	0	0	0	0	0	0	0	0	0	0	0	0	0	0	0	0	0	0	0	0	0
0	0	0	0	0	0	0	0	0	0	0	0	0	0	0	0	0	0	0	0	0	0	0	0	0	0	0	0	0	0	0	0	0	0	0	0	0	0	0	0	0	0	0	0	0	0	0	0	0	0
0	0	0	0	0	0	0	0	0	0	0	0	0	0	0	0	0	0	0	0	0	0	0	0	0	0	0	0	0	0	0	0	0	0	0	0	0	0	0	0	0	0	0	0	0	0	0	0	0	0
0	0	0	0	0	0	0	0	0	0	0	0	0	0	0	0	0	0	0	0	0	0	0	0	0	0	0	0	0	0	0	0	0	0	0	0	0	0	0	0	0	0	0	0	0	0	0	0	0	0
0	0	0	0	0	0	0	0	0	0	0	0	0	0	0	0	0	0	0	0	0	0	0	0	0	0	0	0	0	0	0	0	0	0	0	0	0	0	0	0	0	0	0	0	0	0	0	0	0	0
0	0	0	0	0	0	0	0	0	0	0	0	0	0	0	0	0	0	0	0	0	0	0	0	0	0	0	0	0	0	0	0	0	0	0	0	0	0	0	0	0	0	0	0	0	0	0	0	0	0
0	0	0	0	0	0	0	0	0	0	0	0	0	0	0	0	0	0	0	0	0	0	0	0	0	0	0	0	0	0	0	0	0	0	0	0	0	0	0	0	0	0	0	0	0	0	0	0	0	0
0	0	0	0	0	0	0	0	0	0	0	0	0	0	0	0	0	0	0	0	0	0	0	0	0	0	0	0	0	0	0	0	0	0	0	0	0	0	0	0	0	0	0	0	0	0	0	0	0	0
0	0	0	0	0	0	0	0	0	0	0	0	0	0	0	0	0	0	0	0	0	0	0	0	0	0	0	0	0	0	0	0	0	0	0	0	0	0	0	0	0	0	0	0	0	0	0	0	0	0
0	0	0	0	0	0	0	0	0	0	0	0	0	0	0	0	0	0	0	0	0	0	0	0	0	0	0	0	0	0	0	0	0	0	0	0	0	0	0	0	0	0	0	0	0	0	0	0	0	0
0	0	0	0	0	0	0	0	0	0	0	0	0	0	0	0	0	0	0	0	0	0	0	0	0	0	0	0	0	0	0	0	0	0	0	0	0	0	0	0	0	0	0	0	0	0	0	0	0	0
0	0	0	0	0	0	0	0	0	0	0	0	0	0	0	0	0	0	0	0	0	0	0	0	0	0	0	0	0	0	0	0	0	0	0	0	0	0	0	0	0	0	0	0	0	0	0	0	0	0
0	0	0	0	0	0	0	0	0	0	0	0	0	0	0	0	0	0	0	0	0	0	0	0	0	0	0	0	0	0	0	0	0	0	0	0	0	0	0	0	0	0	0	0	0	0	0	0	0	0
0	0	0	0	0	0	0	0	0	0	0	0	0	0	0	0	0	0	0	0	0	0	0	0	0	0	0	0	0	0	0	0	0	0	0	0	0	0	0	0	0	0	0	0	0	0	0	0	0	0
0	0	0	0	0	0	0	0	0	0	0	0	0	0	0	0	0	0	0	0	0	0	0	0	0	0	0	0	0	0	0	0	0	0	0	0	0	0	0	0	0	0	0	0	0	0	0	0	0	0
0	0	0	0	0	0	0	0	0	0	0	0	0	0	0	0	0	0	0	0	0	0	0	0	0	0	0	0	0	0	0	0	0	0	0	0	0	0	0	0	0	0	0	0	0	0	0	0	0	0
0	0	0	0	0	0	0	0	0	0	0	0	0	0	0	0	0	0	0	0	0	0	0	0	0	0	0	0	0	0	0	0	0	0	0	0	0	0	0	0	0	0	0	0	0	0	0	0	0	0
0	0	0	0	0	0	0	0	0	0	0	0	0	0	0	0	0	0	0	0	0	0	0	0	0	0	0	0	0	0	0	0	0	0	0	0	0	0	0	0	0	0	0	0	0	0	0	0	0	0
0	0	0	0	0	0	0	0	0	0	0	0	0	0	0	0	0	0	0	0	0	0	0	0	0	0	0	0	0	0	0	0	0	0	0	0	0	0	0	0	0	0	0	0	0	0	0	0	0	0
0	0	0	0	0	0	0	0	0	0	0	0	0	0	0	0	0	0	0	0	0	0	0	0	0	0	0	0	0	0	0	0	0	0	0	0	0	0	0	0	0	0	0	0	0	0	0	0	0	0
0	0	0	0	0	0	0	0	0	0	0	0	0	0	0	0	0	0	0	0	0	0	0	0	0	0	0	0	0	0	0	0	0	0	0	0	0	0	0	0	0	0	0	0	0	0	0	0	0	0
0	0	0	0	0	0	0	0	0	0	0	0	0	0	0	0	0	0	0	0	0	0	0	0	0	0	0	0	0	0	0	0	0	0	0	0	0	0	0	0	0	0	0	0	0	0	0	0	0	0
0	0	0	0	0	0	0	0	0	0	0	0	0	0	0	0	0	0	0	0	0	0	0	0	0	0	0	0	0	0	0	0	0	0	0	0	0	0	0	0	0	0	0	0	0	0	0	0	0	0
0	0	0	0	0	0	0	0	0	0	0	0	0	0	0	0	0	0	0	0	0	0	0	0	0	0	0	0	0	0	0	0	0	0	0	0	0	0	0	0	0	0	0	0	0	0	0	0	0	0
0	0	0	0	0	0	0	0	0	0	0	0	0	0	0	0	0	0	0	0	0	0	0	0	0	0	0	0	0	0	0	0	0	0	0	0	0	0	0	0	0	0	0	0	0	0	0	0	0	0
0	0	0	0	0	0	0	0	0	0	0	0	0	0	0	0	0	0	0	0	0	0	0	0	0	0	0	0	0	0	0	0	0	0	0	0	0	0	0	0	0	0	0	0	0	0	0	0	0	0
0	0	0	0	0	0	0	0	0	0	0	0	0	0	0	0	0	0	0	0	0	0	0	0	0	0	0	0	0	0	0	0	0	0	0	0	0	0	0	0	0	0	0	0	0	0	0	0	0	0
0	0	0	0	0	0	0	0	0	0	0	0	0	0	0	0	0	0	0	0	0	0	0	0	0	0	0	0	0	0	0	0	0	0	0	0	0	0	0	0	0	0	0	0	0	0	0	0	0	0
0	0	0	0	0	0	0	0	0	0	0	0	0	0	0	0	0	0	0	0	0	0	0	0	0	0	0	0	0	0	0	0	0	0	0	0	0	0	0	0	0	0	0	0	0	0	0	0	0	0
0	0	0	0	0	0	0	0	0	0	0	0	0	0	0	0	0	0	0	0	0	0	0	0	0	0	0	0	0	0	0	0	0	0	0	0	0	0	0	0	0	0	0	0	0	0	0	0	0	0
0	0	0	0	0	0	0	0	0	0	0	0	0	0	0	0	0	0	0	0	0	0	0	0	0	0	0	0	0	0	0	0	0	0	0	0	0	0	0	0	0	0	0	0	0	0	0	0	0	0
0	0	0	0	0	0	0	0	0	0	0	0	0	0	0	0	0	0	0	0	0	0	0	0	0	0	0	0	0	0	0	0	0	0	0	0	0	0	0	0	0	0	0	0	0	0	0	0	0	0
0	0	0	0	0	0	0	0	0	0	0	0	0	0	0	0	0	0	0	0	0	0	0	0	0	0	0	0	0	0	0	0	0	0	0	0	0	0	0	0	0	0	0	0	0	0	0	0	0	0
0	0	0	0	0	0	0	0	0	0	0	0	0	0	0	0	0	0	0	0	0	0	0	0	0	0	0	0	0	0	0	0	0	0	0	0	0	0	0	0	0	0	0	0	0	0	0	0	0	0
0	0	0	0	0	0	0	0	0	0	0	0	0	0	0	0	0	0	0	0	0	0	0	0	0	0	0	0	0	0	0	0	0	0	0	0	0	0	0	0	0	0	0	0	0	0	0	0	0	0
0	0	0	0	0	0	0	0	0	0	0	0	0	0	0	0	0	0	0	0	0	0	0	0	0	0	0	0	0	0	0	0	0	0	0	0	0	0	0	0	0	0	0	0	0	0	0	0	0	0
0	0	0	0	0	0	0	0	0	0	0	0	0	0	0	0	0	0	0	0	0	0	0	0	0	0	0	0	0	0	0	0	0	0	0	0	0	0	0	0	0	0	0	0	0	0	0	0	0	0
0	0	0	0	0	0	0	0	0	0	0	0	0	0	0	0	0	0	0	0	0	0	0	0	0	0	0	0	0	0	0	0	0	0	0	0	0	0	0	0	0	0	0	0	0	0	0	0	0	0
0	0	0	0	0	0	0	0	0	0	0	0	0	0	0	0	0	0	0	0	0	0	0	0	0	0	0	0	0	0	0	0	0	0	0	0	0	0	0	0	0	0	0	0	0	0	0	0	0	0
0	0	0	0	0	0	0	0	0	0	0	0	0	0	0	0	0	0	0	0	0	0	0	0	0	0	0	0	0	0	0	0	0	0	0	0	0	0	0	0	0	0	0	0	0	0	0	0	0	0
0	0	0	0	0	0	0	0	0	0	0	0	0	0	0	0	0	0	0	0	0	0	0	0	0	0	0	0	0	0	0	0	0	0	0	0	0	0	0	0	0	0	0	0	0	0	0	0	0	0
0	0	0	0	0	0	0	0	0	0	0	0	0	0	0	0	0	0	0	0	0	0	0	0	0	0	0	0	0	0	0	0	0	0	0	0	0	0	0	0	0	0	0	0	0	0	0	0	0	0
0	0	0	0	0	0	0	0	0	0	0	0	0	0	0	0	0	0	0	0	0	0	0	0	0	0	0	0	0	0	0	0	0	0	0	0	0	0	0	0	0	0	0	0	0	0	0	0	0	0
0	0	0	0	0	0	0	0	0	0	0	0	0	0	0	0	0	0	0	0	0	0	0	0	0	0	0	0	0	0	0	0	0	0	0	0	0	0	0	0	0	0	0	0	0	0	0	0	0	0
0	0	0	0	0	0	0	0	0	0	0	0	0	0	0	0	0	0	0	0	0	0	0	0	0	0	0	0	0	0	0	0	0	0	0	0	0	0	0	0	0	0	0	0	0	0	0	0	0	0
0	0	0	0	0	0	0	0	0	0	0	0	0	0	0	0	0	0	0	0	0	0	0	0	0	0	0	0	0	0	0	0	0	0	0	0	0	0	0	0	0	0	0	0	0	0	0	0	0	0
0	0	0	0	0	0	0	0	0	0	0	0	0	0	0	0	0	0	0	0	0	0	0	0	0	0	0	0	0	0	0	0	0	0	0	0	0	0	0	0	0	0	0	0	0	0	0	0	0	0
0	0	0	0	0	0	0	0	0	0	0	0	0	0	0	0	0	0	0	0	0	0	0	0	0	0	0	0	0	0	0	0	0	0	0	0	0	0	0	0	0	0	0	0	0	0	0	0	0	0
0	0	0	0	0	0	0	0	0	0	0	0	0	0	0	0	0	0	0	0	0	0	0	0	0	0	0	0	0	0	0	0	0	0	0	0	0	0	0	0	0	0	0	0	0	0	0	0	0	0
0	0	0	0	0	0	0	0	0	0	0	0	0	0	0	0	0	0	0	0	0	0	0	0	0	0	0	0	0	0	0	0	0	0	0	0	0	0	0	0	0	0	0	0	0	0	0	0	0	0
0	0	0	0	0	0	0	0	0	0	0	0	0	0	0	0	0	0	0	0	0	0	0	0	0	0	0	0	0	0	0	0	0	0	0	0	0	0	0	0	0	0	0	0	0	0	0	0	0	0
0	0	0	0	0	0	0	0	0	0	0	0	0	0	0	0	0	0	0	0	0	0	0	0	0	0	0	0	0	0	0	0	0	0	0	0	0	0	0	0	0	0	0	0	0	0	0	0	0	0
0	0	0	0	0	0	0	0	0	0	0	0	0	0	0	0	0	0	0	0	0	0	0	0	0	0	0	0	0	0	0	0	0	0	0	0	0	0	0	0	0	0	0	0	0	0	0	0	0	0
0	0	0	0	0	0	0	0	0	0	0	0	0	0	0	0	0	0	0	0	0	0	0	0	0	0	0	0	0	0	0	0	0	0	0	0	0	0	0	0	0	0	0	0	0	0	0	0	0	0
0	0	0	0	0	0	0	0	0	0	0	0	0	0	0	0	0	0	0	0	0	0	0	0	0	0	0	0	0	0	0	0	0	0	0	0	0	0	0	0	0	0	0	0	0	0	0	0	0	0
0	0	0	0	0	0	0	0	0	0	0	0	0	0	0	0	0	0	0	0	0	0	0	0	0	0	0	0	0	0	0	0	0	0	0	0	0	0	0	0	0	0	0	0	0	0	0	0	0	0
0	0	0	0	0	0	0	0	0	0	0	0	0	0	0	0	0	0	0	0	0	0	0	0	0	0	0	0	0	0	0	0	0	0	0	0	0	0	0	0	0	0	0	0	0	0	0	0	0	0
[truncated: 2,510 more columns]
