# Supplementary material for: Application of near-infrared hyperspectral imaging to identify a variety of silage maize seeds and common maize seeds
Source: RSC Adv. 2020 Mar 23;10(20):11707–15. doi: 10.1039/c9ra11047j (PMC9050551; doi:10.1039/c9ra11047j)
Supplement: RA-010-C9RA11047J-s012 [file RA-010-C9RA11047J-s012.xlsx]

## Sheet: Sheet1
0	0	0	0	0	0	0	0	0	0	0	0	0	0	0	0	0	0	0	0	0	0	0	0	0	0	0	0	0	0	0	0	0	0	0	0	0	0	0	0	0	0	0	0	0	0	0	0	0	0
0	0	0	0	0	0	0	0	0	0	0	0	0	0	0	0	0	0	0	0	0	0	0	0	0	0	0	0	0	0	0	0	0	0	0	0	0	0	0	0	0	0	0	0	0	0	0	0	0	0
0	0	0	0	0	0	0	0	0	0	0	0	0	0	0	0	0	0	0	0	0	0	0	0	0	0	0	0	0	0	0	0	0	0	0	0	0	0	0	0	0	0	0	0	0	0	0	0	0	0
0	0	0	0	0	0	0	0	0	0	0	0	0	0	0	0	0	0	0	0	0	0	0	0	0	0	0	0	0	0	0	0	0	0	0	0	0	0	0	0	0	0	0	0	0	0	0	0	0	0
0	0	0	0	0	0	0	0	0	0	0	0	0	0	0	0	0	0	0	0	0	0	0	0	0	0	0	0	0	0	0	0	0	0	0	0	0	0	0	0	0	0	0	0	0	0	0	0	0	0
0	0	0	0	0	0	0	0	0	0	0	0	0	0	0	0	0	0	0	0	0	0	0	0	0	0	0	0	0	0	0	0	0	0	0	0	0	0	0	0	0	0	0	0	0	0	0	0	0	0
0	0	0	0	0	0	0	0	0	0	0	0	0	0	0	0	0	0	0	0	0	0	0	0	0	0	0	0	0	0	0	0	0	0	0	0	0	0	0	0	0	0	0	0	0	0	0	0	0	0
0	0	0	0	0	0	0	0	0	0	0	0	0	0	0	0	0	0	0	0	0	0	0	0	0	0	0	0	0	0	0	0	0	0	0	0	0	0	0	0	0	0	0	0	0	0	0	0	0	0
0	0	0	0	0	0	0	0	0	0	0	0	0	0	0	0	0	0	0	0	0	0	0	0	0	0	0	0	0	0	0	0	0	0	0	0	0	0	0	0	0	0	0	0	0	0	0	0	0	0
0	0	0	0	0	0	0	0	0	0	0	0	0	0	0	0	0	0	0	0	0	0	0	0	0	0	0	0	0	0	0	0	0	0	0	0	0	0	0	0	0	0	0	0	0	0	0	0	0	0
0	0	0	0	0	0	0	0	0	0	0	0	0	0	0	0	0	0	0	0	0	0	0	0	0	0	0	0	0	0	0	0	0	0	0	0	0	0	0	0	0	0	0	0	0	0	0	0	0	0
0	0	0	0	0	0	0	0	0	0	0	0	0	0	0	0	0	0	0	0	0	0	0	0	0	0	0	0	0	0	0	0	0	0	0	0	0	0	0	0	0	0	0	0	0	0	0	0	0	0
0	0	0	0	0	0	0	0	0	0	0	0	0	0	0	0	0	0	0	0	0	0	0	0	0	0	0	0	0	0	0	0	0	0	0	0	0	0	0	0	0	0	0	0	0	0	0	0	0	0
0	0	0	0	0	0	0	0	0	0	0	0	0	0	0	0	0	0	0	0	0	0	0	0	0	0	0	0	0	0	0	0	0	0	0	0	0	0	0	0	0	0	0	0	0	0	0	0	0	0
0	0	0	0	0	0	0	0	0	0	0	0	0	0	0	0	0	0	0	0	0	0	0	0	0	0	0	0	0	0	0	0	0	0	0	0	0	0	0	0	0	0	0	0	0	0	0	0	0	0
0	0	0	0	0	0	0	0	0	0	0	0	0	0	0	0	0	0	0	0	0	0	0	0	0	0	0	0	0	0	0	0	0	0	0	0	0	0	0	0	0	0	0	0	0	0	0	0	0	0
0	0	0	0	0	0	0	0	0	0	0	0	0	0	0	0	0	0	0	0	0	0	0	0	0	0	0	0	0	0	0	0	0	0	0	0	0	0	0	0	0	0	0	0	0	0	0	0	0	0
0	0	0	0	0	0	0	0	0	0	0	0	0	0	0	0	0	0	0	0	0	0	0	0	0	0	0	0	0	0	0	0	0	0	0	0	0	0	0	0	0	0	0	0	0	0	0	0	0	0
0	0	0	0	0	0	0	0	0	0	0	0	0	0	0	0	0	0	0	0	0	0	0	0	0	0	0	0	0	0	0	0	0	0	0	0	0	0	0	0	0	0	0	0	0	0	0	0	0	0
0	0	0	0	0	0	0	0	0	0	0	0	0	0	0	0	0	0	0	0	0	0	0	0	0	0	0	0	0	0	0	0	0	0	0	0	0	0	0	0	0	0	0	0	0	0	0	0	0	0
0	0	0	0	0	0	0	0	0	0	0	0	0	0	0	0	0	0	0	0	0	0	0	0	0	0	0	0	0	0	0	0	0	0	0	0	0	0	0	0	0	0	0	0	0	0	0	0	0	0
0	0	0	0	0	0	0	0	0	0	0	0	0	0	0	0	0	0	0	0	0	0	0	0	0	0	0	0	0	0	0	0	0	0	0	0	0	0	0	0	0	0	0	0	0	0	0	0	0	0
0	0	0	0	0	0	0	0	0	0	0	0	0	0	0	0	0	0	0	0	0	0	0	0	0	0	0	0	0	0	0	0	0	0	0	0	0	0	0	0	0	0	0	0	0	0	0	0	0	0
0	0	0	0	0	0	0	0	0	0	0	0	0	0	0	0	0	0	0	0	0	0	0	0	0	0	0	0	0	0	0	0	0	0	0	0	0	0	0	0	0	0	0	0	0	0	0	0	0	0
0	0	0	0	0	0	0	0	0	0	0	0	0	0	0	0	0	0	0	0	0	0	0	0	0	0	0	0	0	0	0	0	0	0	0	0	0	0	0	0	0	0	0	0	0	0	0	0	0	0
0	0	0	0	0	0	0	0	0	0	0	0	0	0	0	0	0	0	0	0	0	0	0	0	0	0	0	0	0	0	0	0	0	0	0	0	0	0	0	0	0	0	0	0	0	0	0	0	0	0
0	0	0	0	0	0	0	0	0	0	0	0	0	0	0	0	0	0	0	0	0	0	0	0	0	0	0	0	0	0	0	0	0	0	0	0	0	0	0	0	0	0	0	0	0	0	0	0	0	0
0	0	0	0	0	0	0	0	0	0	0	0	0	0	0	0	0	0	0	0	0	0	0	0	0	0	0	0	0	0	0	0	0	0	0	0	0	0	0	0	0	0	0	0	0	0	0	0	0	0
0	0	0	0	0	0	0	0	0	0	0	0	0	0	0	0	0	0	0	0	0	0	0	0	0	0	0	0	0	0	0	0	0	0	0	0	0	0	0	0	0	0	0	0	0	0	0	0	0	0
0	0	0	0	0	0	0	0	0	0	0	0	0	0	0	0	0	0	0	0	0	0	0	0	0	0	0	0	0	0	0	0	0	0	0	0	0	0	0	0	0	0	0	0	0	0	0	0	0	0
0	0	0	0	0	0	0	0	0	0	0	0	0	0	0	0	0	0	0	0	0	0	0	0	0	0	0	0	0	0	0	0	0	0	0	0	0	0	0	0	0	0	0	0	0	0	0	0	0	0
0	0	0	0	0	0	0	0	0	0	0	0	0	0	0	0	0	0	0	0	0	0	0	0	0	0	0	0	0	0	0	0	0	0	0	0	0	0	0	0	0	0	0	0	0	0	0	0	0	0
0	0	0	0	0	0	0	0	0	0	0	0	0	0	0	0	0	0	0	0	0	0	0	0	0	0	0	0	0	0	0	0	0	0	0	0	0	0	0	0	0	0	0	0	0	0	0	0	0	0
0	0	0	0	0	0	0	0	0	0	0	0	0	0	0	0	0	0	0	0	0	0	0	0	0	0	0	0	0	0	0	0	0	0	0	0	0	0	0	0	0	0	0	0	0	0	0	0	0	0
0	0	0	0	0	0	0	0	0	0	0	0	0	0	0	0	0	0	0	0	0	0	0	0	0	0	0	0	0	0	0	0	0	0	0	0	0	0	0	0	0	0	0	0	0	0	0	0	0	0
0	0	0	0	0	0	0	0	0	0	0	0	0	0	0	0	0	0	0	0	0	0	0	0	0	0	0	0	0	0	0	0	0	0	0	0	0	0	0	0	0	0	0	0	0	0	0	0	0	0
0	0	0	0	0	0	0	0	0	0	0	0	0	0	0	0	0	0	0	0	0	0	0	0	0	0	0	0	0	0	0	0	0	0	0	0	0	0	0	0	0	0	0	0	0	0	0	0	0	0
0	0	0	0	0	0	0	0	0	0	0	0	0	0	0	0	0	0	0	0	0	0	0	0	0	0	0	0	0	0	0	0	0	0	0	0	0	0	0	0	0	0	0	0	0	0	0	0	0	0
0	0	0	0	0	0	0	0	0	0	0	0	0	0	0	0	0	0	0	0	0	0	0	0	0	0	0	0	0	0	0	0	0	0	0	0	0	0	0	0	0	0	0	0	0	0	0	0	0	0
0	0	0	0	0	0	0	0	0	0	0	0	0	0	0	0	0	0	0	0	0	0	0	0	0	0	0	0	0	0	0	0	0	0	0	0	0	0	0	0	0	0	0	0	0	0	0	0	0	0
0	0	0	0	0	0	0	0	0	0	0	0	0	0	0	0	0	0	0	0	0	0	0	0	0	0	0	0	0	0	0	0	0	0	0	0	0	0	0	0	0	0	0	0	0	0	0	0	0	0
0	0	0	0	0	0	0	0	0	0	0	0	0	0	0	0	0	0	0	0	0	0	0	0	0	0	0	0	0	0	0	0	0	0	0	0	0	0	0	0	0	0	0	0	0	0	0	0	0	0
0	0	0	0	0	0	0	0	0	0	0	0	0	0	0	0	0	0	0	0	0	0	0	0	0	0	0	0	0	0	0	0	0	0	0	0	0	0	0	0	0	0	0	0	0	0	0	0	0	0
0	0	0	0	0	0	0	0	0	0	0	0	0	0	0	0	0	0	0	0	0	0	0	0	0	0	0	0	0	0	0	0	0	0	0	0	0	0	0	0	0	0	0	0	0	0	0	0	0	0
0	0	0	0	0	0	0	0	0	0	0	0	0	0	0	0	0	0	0	0	0	0	0	0	0	0	0	0	0	0	0	0	0	0	0	0	0	0	0	0	0	0	0	0	0	0	0	0	0	0
0	0	0	0	0	0	0	0	0	0	0	0	0	0	0	0	0	0	0	0	0	0	0	0	0	0	0	0	0	0	0	0	0	0	0	0	0	0	0	0	0	0	0	0	0	0	0	0	0	0
0	0	0	0	0	0	0	0	0	0	0	0	0	0	0	0	0	0	0	0	0	0	0	0	0	0	0	0	0	0	0	0	0	0	0	0	0	0	0	0	0	0	0	0	0	0	0	0	0	0
0	0	0	0	0	0	0	0	0	0	0	0	0	0	0	0	0	0	0	0	0	0	0	0	0	0	0	0	0	0	0	0	0	0	0	0	0	0	0	0	0	0	0	0	0	0	0	0	0	0
0	0	0	0	0	0	0	0	0	0	0	0	0	0	0	0	0	0	0	0	0	0	0	0	0	0	0	0	0	0	0	0	0	0	0	0	0	0	0	0	0	0	0	0	0	0	0	0	0	0
0	0	0	0	0	0	0	0	0	0	0	0	0	0	0	0	0	0	0	0	0	0	0	0	0	0	0	0	0	0	0	0	0	0	0	0	0	0	0	0	0	0	0	0	0	0	0	0	0	0
0	0	0	0	0	0	0	0	0	0	0	0	0	0	0	0	0	0	0	0	0	0	0	0	0	0	0	0	0	0	0	0	0	0	0	0	0	0	0	0	0	0	0	0	0	0	0	0	0	0
0	0	0	0	0	0	0	0	0	0	0	0	0	0	0	0	0	0	0	0	0	0	0	0	0	0	0	0	0	0	0	0	0	0	0	0	0	0	0	0	0	0	0	0	0	0	0	0	0	0
0	0	0	0	0	0	0	0	0	0	0	0	0	0	0	0	0	0	0	0	0	0	0	0	0	0	0	0	0	0	0	0	0	0	0	0	0	0	0	0	0	0	0	0	0	0	0	0	0	0
0	0	0	0	0	0	0	0	0	0	0	0	0	0	0	0	0	0	0	0	0	0	0	0	0	0	0	0	0	0	0	0	0	0	0	0	0	0	0	0	0	0	0	0	0	0	0	0	0	0
0	0	0	0	0	0	0	0	0	0	0	0	0	0	0	0	0	0	0	0	0	0	0	0	0	0	0	0	0	0	0	0	0	0	0	0	0	0	0	0	0	0	0	0	0	0	0	0	0	0
0	0	0	0	0	0	0	0	0	0	0	0	0	0	0	0	0	0	0	0	0	0	0	0	0	0	0	0	0	0	0	0	0	0	0	0	0	0	0	0	0	0	0	0	0	0	0	0	0	0
0	0	0	0	0	0	0	0	0	0	0	0	0	0	0	0	0	0	0	0	0	0	0	0	0	0	0	0	0	0	0	0	0	0	0	0	0	0	0	0	0	0	0	0	0	0	0	0	0	0
0	0	0	0	0	0	0	0	0	0	0	0	0	0	0	0	0	0	0	0	0	0	0	0	0	0	0	0	0	0	0	0	0	0	0	0	0	0	0	0	0	0	0	0	0	0	0	0	0	0
0	0	0	0	0	0	0	0	0	0	0	0	0	0	0	0	0	0	0	0	0	0	0	0	0	0	0	0	0	0	0	0	0	0	0	0	0	0	0	0	0	0	0	0	0	0	0	0	0	0
0	0	0	0	0	0	0	0	0	0	0	0	0	0	0	0	0	0	0	0	0	0	0	0	0	0	0	0	0	0	0	0	0	0	0	0	0	0	0	0	0	0	0	0	0	0	0	0	0	0
0	0	0	0	0	0	0	0	0	0	0	0	0	0	0	0	0	0	0	0	0	0	0	0	0	0	0	0	0	0	0	0	0	0	0	0	0	0	0	0	0	0	0	0	0	0	0	0	0	0
0	0	0	0	0	0	0	0	0	0	0	0	0	0	0	0	0	0	0	0	0	0	0	0	0	0	0	0	0	0	0	0	0	0	0	0	0	0	0	0	0	0	0	0	0	0	0	0	0	0
0	0	0	0	0	0	0	0	0	0	0	0	0	0	0	0	0	0	0	0	0	0	0	0	0	0	0	0	0	0	0	0	0	0	0	0	0	0	0	0	0	0	0	0	0	0	0	0	0	0
0	0	0	0	0	0	0	0	0	0	0	0	0	0	0	0	0	0	0	0	0	0	0	0	0	0	0	0	0	0	0	0	0	0	0	0	0	0	0	0	0	0	0	0	0	0	0	0	0	0
0	0	0	0	0	0	0	0	0	0	0	0	0	0	0	0	0	0	0	0	0	0	0	0	0	0	0	0	0	0	0	0	0	0	0	0	0	0	0	0	0	0	0	0	0	0	0	0	0	0
0	0	0	0	0	0	0	0	0	0	0	0	0	0	0	0	0	0	0	0	0	0	0	0	0	0	0	0	0	0	0	0	0	0	0	0	0	0	0	0	0	0	0	0	0	0	0	0	0	0
0	0	0	0	0	0	0	0	0	0	0	0	0	0	0	0	0	0	0	0	0	0	0	0	0	0	0	0	0	0	0	0	0	0	0	0	0	0	0	0	0	0	0	0	0	0	0	0	0	0
0	0	0	0	0	0	0	0	0	0	0	0	0	0	0	0	0	0	0	0	0	0	0	0	0	0	0	0	0	0	0	0	0	0	0	0	0	0	0	0	0	0	0	0	0	0	0	0	0	0
0	0	0	0	0	0	0	0	0	0	0	0	0	0	0	0	0	0	0	0	0	0	0	0	0	0	0	0	0	0	0	0	0	0	0	0	0	0	0	0	0	0	0	0	0	0	0	0	0	0
0	0	0	0	0	0	0	0	0	0	0	0	0	0	0	0	0	0	0	0	0	0	0	0	0	0	0	0	0	0	0	0	0	0	0	0	0	0	0	0	0	0	0	0	0	0	0	0	0	0
0	0	0	0	0	0	0	0	0	0	0	0	0	0	0	0	0	0	0	0	0	0	0	0	0	0	0	0	0	0	0	0	0	0	0	0	0	0	0	0	0	0	0	0	0	0	0	0	0	0
0	0	0	0	0	0	0	0	0	0	0	0	0	0	0	0	0	0	0	0	0	0	0	0	0	0	0	0	0	0	0	0	0	0	0	0	0	0	0	0	0	0	0	0	0	0	0	0	0	0
0	0	0	0	0	0	0	0	0	0	0	0	0	0	0	0	0	0	0	0	0	0	0	0	0	0	0	0	0	0	0	0	0	0	0	0	0	0	0	0	0	0	0	0	0	0	0	0	0	0
0	0	0	0	0	0	0	0	0	0	0	0	0	0	0	0	0	0	0	0	0	0	0	0	0	0	0	0	0	0	0	0	0	0	0	0	0	0	0	0	0	0	0	0	0	0	0	0	0	0
0	0	0	0	0	0	0	0	0	0	0	0	0	0	0	0	0	0	0	0	0	0	0	0	0	0	0	0	0	0	0	0	0	0	0	0	0	0	0	0	0	0	0	0	0	0	0	0	0	0
0	0	0	0	0	0	0	0	0	0	0	0	0	0	0	0	0	0	0	0	0	0	0	0	0	0	0	0	0	0	0	0	0	0	0	0	0	0	0	0	0	0	0	0	0	0	0	0	0	0
0	0	0	0	0	0	0	0	0	0	0	0	0	0	0	0	0	0	0	0	0	0	0	0	0	0	0	0	0	0	0	0	0	0	0	0	0	0	0	0	0	0	0	0	0	0	0	0	0	0
0	0	0	0	0	0	0	0	0	0	0	0	0	0	0	0	0	0	0	0	0	0	0	0	0	0	0	0	0	0	0	0	0	0	0	0	0	0	0	0	0	0	0	0	0	0	0	0	0	0
0	0	0	0	0	0	0	0	0	0	0	0	0	0	0	0	0	0	0	0	0	0	0	0	0	0	0	0	0	0	0	0	0	0	0	0	0	0	0	0	0	0	0	0	0	0	0	0	0	0
0	0	0	0	0	0	0	0	0	0	0	0	0	0	0	0	0	0	0	0	0	0	0	0	0	0	0	0	0	0	0	0	0	0	0	0	0	0	0	0	0	0	0	0	0	0	0	0	0	0
0	0	0	0	0	0	0	0	0	0	0	0	0	0	0	0	0	0	0	0	0	0	0	0	0	0	0	0	0	0	0	0	0	0	0	0	0	0	0	0	0	0	0	0	0	0	0	0	0	0
0	0	0	0	0	0	0	0	0	0	0	0	0	0	0	0	0	0	0	0	0	0	0	0	0	0	0	0	0	0	0	0	0	0	0	0	0	0	0	0	0	0	0	0	0	0	0	0	0	0
0	0	0	0	0	0	0	0	0	0	0	0	0	0	0	0	0	0	0	0	0	0	0	0	0	0	0	0	0	0	0	0	0	0	0	0	0	0	0	0	0	0	0	0	0	0	0	0	0	0
0	0	0	0	0	0	0	0	0	0	0	0	0	0	0	0	0	0	0	0	0	0	0	0	0	0	0	0	0	0	0	0	0	0	0	0	0	0	0	0	0	0	0	0	0	0	0	0	0	0
0	0	0	0	0	0	0	0	0	0	0	0	0	0	0	0	0	0	0	0	0	0	0	0	0	0	0	0	0	0	0	0	0	0	0	0	0	0	0	0	0	0	0	0	0	0	0	0	0	0
0	0	0	0	0	0	0	0	0	0	0	0	0	0	0	0	0	0	0	0	0	0	0	0	0	0	0	0	0	0	0	0	0	0	0	0	0	0	0	0	0	0	0	0	0	0	0	0	0	0
0	0	0	0	0	0	0	0	0	0	0	0	0	0	0	0	0	0	0	0	0	0	0	0	0	0	0	0	0	0	0	0	0	0	0	0	0	0	0	0	0	0	0	0	0	0	0	0	0	0
0	0	0	0	0	0	0	0	0	0	0	0	0	0	0	0	0	0	0	0	0	0	0	0	0	0	0	0	0	0	0	0	0	0	0	0	0	0	0	0	0	0	0	0	0	0	0	0	0	0
0	0	0	0	0	0	0	0	0	0	0	0	0	0	0	0	0	0	0	0	0	0	0	0	0	0	0	0	0	0	0	0	0	0	0	0	0	0	0	0	0	0	0	0	0	0	0	0	0	0
0	0	0	0	0	0	0	0	0	0	0	0	0	0	0	0	0	0	0	0	0	0	0	0	0	0	0	0	0	0	0	0	0	0	0	0	0	0	0	0	0	0	0	0	0	0	0	0	0	0
0	0	0	0	0	0	0	0	0	0	0	0	0	0	0	0	0	0	0	0	0	0	0	0	0	0	0	0	0	0	0	0	0	0	0	0	0	0	0	0	0	0	0	0	0	0	0	0	0	0
0	0	0	0	0	0	0	0	0	0	0	0	0	0	0	0	0	0	0	0	0	0	0	0	0	0	0	0	0	0	0	0	0	0	0	0	0	0	0	0	0	0	0	0	0	0	0	0	0	0
0	0	0	0	0	0	0	0	0	0	0	0	0	0	0	0	0	0	0	0	0	0	0	0	0	0	0	0	0	0	0	0	0	0	0	0	0	0	0	0	0	0	0	0	0	0	0	0	0	0
0	0	0	0	0	0	0	0	0	0	0	0	0	0	0	0	0	0	0	0	0	0	0	0	0	0	0	0	0	0	0	0	0	0	0	0	0	0	0	0	0	0	0	0	0	0	0	0	0	0
0	0	0	0	0	0	0	0	0	0	0	0	0	0	0	0	0	0	0	0	0	0	0	0	0	0	0	0	0	0	0	0	0	0	0	0	0	0	0	0	0	0	0	0	0	0	0	0	0	0
0	0	0	0	0	0	0	0	0	0	0	0	0	0	0	0	0	0	0	0	0	0	0	0	0	0	0	0	0	0	0	0	0	0	0	0	0	0	0	0	0	0	0	0	0	0	0	0	0	0
0	0	0	0	0	0	0	0	0	0	0	0	0	0	0	0	0	0	0	0	0	0	0	0	0	0	0	0	0	0	0	0	0	0	0	0	0	0	0	0	0	0	0	0	0	0	0	0	0	0
0	0	0	0	0	0	0	0	0	0	0	0	0	0	0	0	0	0	0	0	0	0	0	0	0	0	0	0	0	0	0	0	0	0	0	0	0	0	0	0	0	0	0	0	0	0	0	0	0	0
0	0	0	0	0	0	0	0	0	0	0	0	0	0	0	0	0	0	0	0	0	0	0	0	0	0	0	0	0	0	0	0	0	0	0	0	0	0	0	0	0	0	0	0	0	0	0	0	0	0
0	0	0	0	0	0	0	0	0	0	0	0	0	0	0	0	0	0	0	0	0	0	0	0	0	0	0	0	0	0	0	0	0	0	0	0	0	0	0	0	0	0	0	0	0	0	0	0	0	0
0	0	0	0	0	0	0	0	0	0	0	0	0	0	0	0	0	0	0	0	0	0	0	0	0	0	0	0	0	0	0	0	0	0	0	0	0	0	0	0	0	0	0	0	0	0	0	0	0	0
0	0	0	0	0	0	0	0	0	0	0	0	0	0	0	0	0	0	0	0	0	0	0	0	0	0	0	0	0	0	0	0	0	0	0	0	0	0	0	0	0	0	0	0	0	0	0	0	0	0
0	0	0	0	0	0	0	0	0	0	0	0	0	0	0	0	0	0	0	0	0	0	0	0	0	0	0	0	0	0	0	0	0	0	0	0	0	0	0	0	0	0	0	0	0	0	0	0	0	0
0	0	0	0	0	0	0	0	0	0	0	0	0	0	0	0	0	0	0	0	0	0	0	0	0	0	0	0	0	0	0	0	0	0	0	0	0	0	0	0	0	0	0	0	0	0	0	0	0	0
0	0	0	0	0	0	0	0	0	0	0	0	0	0	0	0	0	0	0	0	0	0	0	0	0	0	0	0	0	0	0	0	0	0	0	0	0	0	0	0	0	0	0	0	0	0	0	0	0	0
0	0	0	0	0	0	0	0	0	0	0	0	0	0	0	0	0	0	0	0	0	0	0	0	0	0	0	0	0	0	0	0	0	0	0	0	0	0	0	0	0	0	0	0	0	0	0	0	0	0
0	0	0	0	0	0	0	0	0	0	0	0	0	0	0	0	0	0	0	0	0	0	0	0	0	0	0	0	0	0	0	0	0	0	0	0	0	0	0	0	0	0	0	0	0	0	0	0	0	0
0	0	0	0	0	0	0	0	0	0	0	0	0	0	0	0	0	0	0	0	0	0	0	0	0	0	0	0	0	0	0	0	0	0	0	0	0	0	0	0	0	0	0	0	0	0	0	0	0	0
0	0	0	0	0	0	0	0	0	0	0	0	0	0	0	0	0	0	0	0	0	0	0	0	0	0	0	0	0	0	0	0	0	0	0	0	0	0	0	0	0	0	0	0	0	0	0	0	0	0
0	0	0	0	0	0	0	0	0	0	0	0	0	0	0	0	0	0	0	0	0	0	0	0	0	0	0	0	0	0	0	0	0	0	0	0	0	0	0	0	0	0	0	0	0	0	0	0	0	0
0	0	0	0	0	0	0	0	0	0	0	0	0	0	0	0	0	0	0	0	0	0	0	0	0	0	0	0	0	0	0	0	0	0	0	0	0	0	0	0	0	0	0	0	0	0	0	0	0	0
0	0	0	0	0	0	0	0	0	0	0	0	0	0	0	0	0	0	0	0	0	0	0	0	0	0	0	0	0	0	0	0	0	0	0	0	0	0	0	0	0	0	0	0	0	0	0	0	0	0
0	0	0	0	0	0	0	0	0	0	0	0	0	0	0	0	0	0	0	0	0	0	0	0	0	0	0	0	0	0	0	0	0	0	0	0	0	0	0	0	0	0	0	0	0	0	0	0	0	0
0	0	0	0	0	0	0	0	0	0	0	0	0	0	0	0	0	0	0	0	0	0	0	0	0	0	0	0	0	0	0	0	0	0	0	0	0	0	0	0	0	0	0	0	0	0	0	0	0	0
0	0	0	0	0	0	0	0	0	0	0	0	0	0	0	0	0	0	0	0	0	0	0	0	0	0	0	0	0	0	0	0	0	0	0	0	0	0	0	0	0	0	0	0	0	0	0	0	0	0
0	0	0	0	0	0	0	0	0	0	0	0	0	0	0	0	0	0	0	0	0	0.063598	0.0695004	0.041185	0.0299875	0.0389036	0.0114091	0	0	0	0	0	0	0	0	0	0	0	0	0	0	0	0	0	0	0	0	0	0	0
0	0	0	0	0	0	0	0	0	0	0	0	0	0	0	0	0	0	0	0	0.069187	0.0467251	0.039025	0.0285269	0.0312012	0.0212337	0.0142838	0.0327799	0.0153818	0	0	0	0	0	0	0	0	0	0	0	0	0	0	0	0	0	0	0	0	0
0	0	0	0	0	0	0	0	0	0	0	0	0	0	0	0.046742	0.027608	0	0	0.0379917	0.0525217	0.0225527	0.0206322	0.0218191	0.0161949	0.0153903	0.0219588	0.0250585	0.0249563	0.00290349	0	0	0	0	0	0	0	0	0	0	0	0	0	0	0	0	0	0	0	0
0	0	0	0	0	0	0	0	0	0	0	0	0	0	0.11387	0.0678452	0.0715887	0.0608611	0.0111458	0.037759	0.0272538	0.0167549	0.0121607	0.0172115	0.00758762	0.0160502	0.00899701	0.0273862	0.0294948	0.0148273	0.00873586	0	0	0	0	0	0	0	0	0	0	0	0	0	0	0	0	0	0	0
0	0	0	0	0	0	0	0	0	0	0	0	0	0	0.109304	0.0912208	0.0881689	0.0371252	0.00325641	0.0285809	0.0115935	0.00877494	0.0155693	0.0205164	0.0238932	0.0284113	0.024385	0.0252858	0.0285279	0.0220155	0.0165581	0.0103825	-0.0100881	0	0	0	0	0	0	0	0	0	0	0	0	0	0	0	0	0
0	0	0	0	0	0	0	0	0	0	0	0	0	0.07017	0.0785249	0.0944793	0.067108	0.0203814	0.00523167	0.0251509	0.0204075	0.0243488	0.0213253	0.0244024	0.0333506	0.0291607	0.0288248	0.0410621	0.0302024	0.0174008	0.0243224	0.0171813	0.000276645	0.00758247	0	0	0	0	0	0	0	0	0	0	0	0	0	0	0	0
0	0	0	0	0	0	0	0	0	0	0	0	0	0.0276298	0.0625936	0.0557136	0.0436432	0.0449231	0.0144994	0.0269352	0.00272991	-0.00797461	-0.0102594	0.0346511	0.0762737	0.101399	0.104753	0.11262	0.101019	0.0782899	0.0691898	0.0578074	0.0146629	0.0185099	0.0119784	0	0	0	0	0	0	0	0	0	0	0	0	0	0	0
0	0	0	0	0	0	0	0	0	0	0	0	0	0.0614992	0.0764881	0.063929	0.0531942	0.0588127	-0.00663357	-0.00412143	0.0117738	0.0184939	0.0118541	0.0244457	0.0274861	0.0391395	0.0495878	0.069693	0.0656305	0.0428722	0.0441119	0.0339605	0.011641	0.0241015	0.0144178	0.00610653	0	0	0	0	0	0	0	0	0	0	0	0	0	0
0	0	0	0	0	0	0	0	0	0	0	0	0	0	0.043127	0.0320528	0.0507747	0.046537	-0.00134974	-0.0302552	0.00629813	0.0127511	0.0078929	0.019186	0.0256382	0.0287693	0.0365039	0.0544451	0.0664065	0.0786352	0.0759121	0.0379286	0.0246538	0.0244927	0.02199	0.0202813	0.0111213	-0.0113922	0	0	0	0	0	0	0	0	0	0	0	0
0	0	0	0	0	0	0	0	0	0	0	0	0	0	0.0767253	0.0541321	0.0326607	0.0215591	0.000678412	-0.0168681	-0.0133095	0.0182115	0.0182526	0.018537	0.017935	0.0211483	0.0171816	0.0270255	0.042548	0.011564	0.0299101	0.0293776	0.0145444	0.0322768	0.0316669	0.0168265	0.0243519	0.00834894	-0.00149814	0	0	0	0	0	0	0	0	0	0	0
0	0	0	0	0	0	0	0	0	0	0	0	0	0.0850628	0.0692847	0.0413512	0.0254404	0.00675038	0.00149827	-0.00640075	-0.00675767	0.00932247	0.0197829	0.0242543	0.0221827	0.00827946	0.0215028	0.0397199	0.023619	0.0150909	0.0203788	0.0302321	0.0149148	0.0325137	0.0214867	0.0323358	0.0147376	0.016361	-0.00106566	0	0	0	0	0	0	0	0	0	0	0
0	0	0	0	0	0	0	0	0	0	0	0	0	0.0737041	0.0691538	0.0416225	0.0232987	0.00845935	0.00192641	-3.04854e-05	-0.00896664	0.00255535	0.0138131	0.0218263	0.024165	0.0226299	0.018768	0.0468625	0.0356327	0.0130027	0.0216455	0.0270868	0.0156583	0.0313977	0.0300319	0.0264726	0.0363181	0.0186532	-0.000144865	0	0	0	0	0	0	0	0	0	0	0
0	0	0	0	0	0	0	0	0	0	0	0	0	0.0412642	0.0383124	0.0323961	0.0164923	0.00513313	0.0107007	0.01145	-0.0109825	0.000822007	0.0086035	0.00797818	0.0140265	0.0167568	0.0219557	0.0307004	0.0321544	0.000432578	0.027715	0.0326815	0.0183755	0.0366869	0.0236941	0.0198936	0.0245944	0.0222735	0.00818413	0	0	0	0	0	0	0	0	0	0	0
0	0	0	0	0	0	0	0	0	0	0	0	0	0.0410118	0.0258373	0.0299992	0.0306745	0.0177982	-0.00142359	0.0013851	0.00116513	0.0132974	0.0043476	0.0136554	0.0256063	0.0254702	0.0333383	0.0335395	0.0294677	0.0131211	0.0399809	0.0324546	0.0313889	0.040819	0.0407212	0.0367536	0.0303926	0.0204475	0.00703854	0	0	0	0	0	0	0	0	0	0	0
0	0	0	0	0	0	0	0	0	0	0	0	0	0	0.0337773	0.0175804	0.0168081	0.0151691	0.010425	0.0205311	0.0108213	0.0115808	0.0182903	0.0174072	0.010678	0.0220755	0.0288693	0.0306108	0.0285555	0.0271078	0.0409471	0.0454646	0.0364831	0.0482088	0.0348791	0.033805	0.0274826	0.0220737	0.00791714	0	0	0	0	0	0	0	0	0	0	0
0	0	0	0	0	0	0	0	0	0	0	0	0	0	0	0	0.0570852	0.0347117	0.0331445	0.0442588	0.0443974	0.0426457	0.0374584	0.0336472	0.0258771	0.0309658	0.024037	0.0465671	0.0724284	0.0641436	0.0406632	0.0375646	0.0335365	0.0459914	0.0461185	0.0406291	0.0459844	0.0516481	0	0	0	0	0	0	0	0	0	0	0	0
0	0	0	0	0	0	0	0	0	0	0	0	0	0	0	0	0	0.0175735	0.00544718	0.0363912	0.0237542	0.0221546	0.0251024	0.0370791	0.0184848	0.0265271	0.0227866	0.0420658	0.02956	0.0325177	0.0632344	0.0324065	0.0142594	0.0375533	0.0369654	0.0172915	0.0115087	0	0	0	0	0	0	0	0	0	0	0	0	0
0	0	0	0	0	0	0	0	0	0	0	0	0	0	0	0	0	0	0.029252	0.0305011	0.0279621	0.0253073	0.037317	0.0302634	0.029912	0.0215974	0.0256386	0.0413214	0.0413641	0.0628901	0.058615	0.0366174	0.0274718	0.0387643	0.0306934	0.0277127	0	0	0	0	0	0	0	0	0	0	0	0	0	0
0	0	0	0	0	0	0	0	0	0	0	0	0	0	0	0	0	0	0	0.0452251	0.0294662	0.027289	0.0198344	0.0291059	0.0339024	0.0435014	0.0421857	0.0418369	0.0548574	0.0363272	0.03253	0.033008	0.0217141	0.0244003	0.00763229	0	0	0	0	0	0	0	0	0	0	0	0	0	0	0
0	0	0	0	0	0	0	0	0	0	0	0	0	0	0	0	0	0	0	0	0	0.0295864	0.0230101	0.0381763	0.0271952	0.0304521	0.0327579	0.0473345	0.0428472	0.0450881	0.0417872	0.0356698	0.0203652	0.0262326	0	0	0	0	0	0	0	0	0	0	0	0	0	0	0	0
0	0	0	0	0	0	0	0	0	0	0	0	0	0	0	0	0	0	0	0	0	0	0	0.0365904	0.0319289	0.0363629	0.0319613	0.0288391	0.0283086	0.0339535	0.0387357	0.0417449	0	0	0	0	0	0	0	0	0	0	0	0	0	0	0	0	0	0
0	0	0	0	0	0	0	0	0	0	0	0	0	0	0	0	0	0	0	0	0	0	0	0	0	0	0	0	0	0	0	0	0	0	0	0	0	0	0	0	0	0	0	0	0	0	0	0	0	0
0	0	0	0	0	0	0	0	0	0	0	0	0	0	0	0	0	0	0	0	0	0	0	0	0	0	0	0	0	0	0	0	0	0	0	0	0	0	0	0	0	0	0	0	0	0	0	0	0	0
0	0	0	0	0	0	0	0	0	0	0	0	0	0	0	0	0	0	0	0	0	0	0	0	0	0	0	0	0	0	0	0	0	0	0	0	0	0	0	0	0	0	0	0	0	0	0	0	0	0
0	0	0	0	0	0	0	0	0	0	0	0	0	0	0	0	0	0	0	0	0	0	0	0	0	0	0	0	0	0	0	0	0	0	0	0	0	0	0	0	0	0	0	0	0	0	0	0	0	0
0	0	0	0	0	0	0	0	0	0	0	0	0	0	0	0	0	0	0	0	0	0	0	0	0	0	0	0	0	0	0	0	0	0	0	0	0	0	0	0	0	0	0	0	0	0	0	0	0	0
0	0	0	0	0	0	0	0	0	0	0	0	0	0	0	0	0	0	0	0	0	0	0	0	0	0	0	0	0	0	0	0	0	0	0	0	0	0	0	0	0	0	0	0	0	0	0	0	0	0
0	0	0	0	0	0	0	0	0	0	0	0	0	0	0	0	0	0	0	0	0	0	0	0	0	0	0	0	0	0	0	0	0	0	0	0	0	0	0	0	0	0	0	0	0	0	0	0	0	0
0	0	0	0	0	0	0	0	0	0	0	0	0	0	0	0	0	0	0	0	0	0	0	0	0	0	0	0	0	0	0	0	0	0	0	0	0	0	0	0	0	0	0	0	0	0	0	0	0	0
0	0	0	0	0	0	0	0	0	0	0	0	0	0	0	0	0	0	0	0	0	0	0	0	0	0	0	0	0	0	0	0	0	0	0	0	0	0	0	0	0	0	0	0	0	0	0	0	0	0
0	0	0	0	0	0	0	0	0	0	0	0	0	0	0	0	0	0	0	0	0	0	0	0	0	0	0	0	0	0	0	0	0	0	0	0	0	0	0	0	0	0	0	0	0	0	0	0	0	0
0	0	0	0	0	0	0	0	0	0	0	0	0	0	0	0	0	0	0	0	0	0	0	0	0	0	0	0	0	0	0	0	0	0	0	0	0	0	0	0	0	0	0	0	0	0	0	0	0	0
0	0	0	0	0	0	0	0	0	0	0	0	0	0	0	0	0	0	0	0	0	0	0	0	0	0	0	0	0	0	0	0	0	0	0	0	0	0	0	0	0	0	0	0	0	0	0	0	0	0
0	0	0	0	0	0	0	0	0	0	0	0	0	0	0	0	0	0	0	0	0	0	0	0	0	0	0	0	0	0	0	0	0	0	0	0	0	0	0	0	0	0	0	0	0	0	0	0	0	0
0	0	0	0	0	0	0	0	0	0	0	0	0	0	0	0	0	0	0	0	0	0	0	0	0	0	0	0	0	0	0	0	0	0	0	0	0	0	0	0	0	0	0	0	0	0	0	0	0	0
0	0	0	0	0	0	0	0	0	0	0	0	0	0	0	0	0	0	0	0	0	0	0	0	0	0	0	0	0	0	0	0	0	0	0	0	0	0	0	0	0	0	0	0	0	0	0	0	0	0
0	0	0	0	0	0	0	0	0	0	0	0	0	0	0	0	0	0	0	0	0	0	0	0	0	0	0	0	0	0	0	0	0	0	0	0	0	0	0	0	0	0	0	0	0	0	0	0	0	0
0	0	0	0	0	0	0	0	0	0	0	0	0	0	0	0	0	0	0	0	0	0	0	0	0	0	0	0	0	0	0	0	0	0	0	0	0	0	0	0	0	0	0	0	0	0	0	0	0	0
0	0	0	0	0	0	0	0	0	0	0	0	0	0	0	0	0	0	0	0	0	0	0	0	0	0	0	0	0	0	0	0	0	0	0	0	0	0	0	0	0	0	0	0	0	0	0	0	0	0
0	0	0	0	0	0	0	0	0	0	0	0	0	0	0	0	0	0	0	0	0	0	0	0	0	0	0	0	0	0	0	0	0	0	0	0	0	0	0	0	0	0	0	0	0	0	0	0	0	0
0	0	0	0	0	0	0	0	0	0	0	0	0	0	0	0	0	0	0	0	0	0	0	0	0	0	0	0	0	0	0	0	0	0	0	0	0	0	0	0	0	0	0	0	0	0	0	0	0	0
0	0	0	0	0	0	0	0	0	0	0	0	0	0	0	0	0	0	0	0	0	0	0	0	0	0	0	0	0	0	0	0	0	0	0	0	0	0	0	0	0	0	0	0	0	0	0	0	0	0
0	0	0	0	0	0	0	0	0	0	0	0	0	0	0	0	0	0	0	0	0	0	0	0	0	0	0	0	0	0	0	0	0	0	0	0	0	0	0	0	0	0	0	0	0	0	0	0	0	0
0	0	0	0	0	0	0	0	0	0	0	0	0	0	0	0	0	0	0	0	0	0	0	0	0	0	0	0	0	0	0	0	0	0	0	0	0	0	0	0	0	0	0	0	0	0	0	0	0	0
0	0	0	0	0	0	0	0	0	0	0	0	0	0	0	0	0	0	0	0	0	0	0	0	0	0	0	0	0	0	0	0	0	0	0	0	0	0	0	0	0	0	0	0	0	0	0	0	0	0
0	0	0	0	0	0	0	0	0	0	0	0	0	0	0	0	0	0	0	0	0	0	0	0	0	0	0	0	0	0	0	0	0	0	0	0	0	0	0	0	0	0	0	0	0	0	0	0	0	0
0	0	0	0	0	0	0	0	0	0	0	0	0	0	0	0	0	0	0	0	-0.00866642	-0.0148575	-0.013656	0.0193927	0.0222287	0	0	0	0	0	0	0	0	0	0	0	0	0	0	0	0	0	0	0	0	0	0	0	0	0
0	0	0	0	0	0	0	0	0	0	0	0	0	0	0	0	0.0522952	0.0270067	0.0272363	-0.00889071	-0.0394133	-0.00945871	0.0184825	0.011657	-0.000277439	0.0099507	0.004411	0.00277443	-0.00210314	-0.0653203	0	0	0	0	0	0	0	0	0	0	0	0	0	0	0	0	0	0	0	0
0	0	0	0	0	0	0	0	0	0	0	0	0	0	0	0.0484447	0.0275991	0.0392874	0.014191	0.000513103	-0.0167153	-0.00066494	0.0222315	0.0349892	-0.00255234	-0.00429213	0.00990815	0.00234374	0.0153415	-0.0562596	0	0	0	0	0	0	0	0	0	0	0	0	0	0	0	0	0	0	0	0
0	0	0	0	0	0	0	0	0	0	0	0	0	0	0.0700785	0.0491402	0.0454538	0.0454387	0.0212345	-0.00446839	-0.0267029	-0.00728292	0.0226834	0.0190615	-0.00382799	0.00125837	-0.0101634	0.00534173	0.00262145	-0.0546175	0	0	0	0	0	0	0	0	0	0	0	0	0	0	0	0	0	0	0	0
0	0	0	0	0	0	0	0	0	0	0	0	0	0	0.0654932	0.044052	0.032797	0.0272175	-0.0111533	-0.036512	-0.0433954	-0.0138768	0.0129645	0.0243623	0.00147736	0.00483658	-0.0305381	-0.01303	-0.0218784	-0.0483575	0	0	0	0	0	0	0	0	0	0	0	0	0	0	0	0	0	0	0	0
0	0	0	0	0	0	0	0	0	0	0	0	0	0	0.0567965	0.0500097	0.0208292	0.0232462	-0.0253147	-0.0356364	-0.0463083	-0.0190758	-0.0240669	-0.000967697	-0.00554196	-0.0102501	-0.0122515	0.00148741	-0.00874017	-0.0349413	0	0	0	0	0	0	0	0	0	0	0	0	0	0	0	0	0	0	0	0
0	0	0	0	0	0	0	0	0	0	0	0	0	0	0.0545698	0.0464958	0.0289459	0.0079448	-0.0142962	-0.0442866	-0.042158	-0.018356	-0.0260746	-0.039002	-0.0129762	-0.00908101	-0.00333265	-0.00138127	-0.00427632	-0.0624187	-0.0753713	0	0	0	0	0	0	0	0	0	0	0	0	0	0	0	0	0	0	0
0	0	0	0	0	0	0	0	0	0	0	0	0	0	0.0337695	0.0218277	0.00309708	-0.0012011	-0.0104469	-0.0254696	-0.0371371	-0.0246694	0.00451619	-0.0204286	-0.0488419	-0.041971	-0.0383272	-0.00923435	0.00235858	-0.0096569	-0.0172444	0	0	0	0	0	0	0	0	0	0	0	0	0	0	0	0	0	0	0
0	0	0	0	0	0	0	0	0	0	0	0	0	0	0.0386836	0.0232087	0.0249871	0.0205481	-0.00710233	-0.0255546	-0.0358826	-0.0274758	0.0012844	0.00990547	-0.0293352	-0.0339487	-0.0311501	-0.0129996	-0.0142252	-0.0411165	-0.0107963	-0.0685941	0	0	0	0	0	0	0	0	0	0	0	0	0	0	0	0	0	0
0	0	0	0	0	0	0	0	0	0	0	0	0	0	0.0441526	0.028665	0.0208916	0.0188056	0.0212855	0.00809282	0.0261969	0.0049784	-0.00555466	0.0039832	-0.0228204	-0.0427292	-0.0736569	-0.0253671	0.00529192	-0.0198246	0.00157147	-0.0375149	0	0	0	0	0	0	0	0	0	0	0	0	0	0	0	0	0	0
0	0	0	0	0	0	0	0	0	0	0	0	0	0	0.0387254	0.0249399	0.0169701	0.0184022	0.0115861	0.00852023	-0.00087756	0.000915317	-0.00631524	0.0139157	-0.018658	-0.0462697	-0.0492886	-0.0279696	-0.00799813	-0.00422027	-0.0160095	-0.0465091	0	0	0	0	0	0	0	0	0	0	0	0	0	0	0	0	0	0
0	0	0	0	0	0	0	0	0	0	0	0	0	0.0337215	0.0329031	0.0269352	0.0218568	0.0198163	0.0101472	0.0185714	0.0153544	0.00528802	-0.0210284	-0.00318869	0.00278725	-0.0277678	-0.0569643	-0.0226392	-0.012783	-0.0261666	-0.0197555	-0.0503773	-0.035065	0	0	0	0	0	0	0	0	0	0	0	0	0	0	0	0	0
0	0	0	0	0	0	0	0	0	0	0	0	0	0	0.0404862	0.0307453	0.0129218	0.0187937	0.0203697	0.0194747	0.0266653	-0.00113333	-0.00632539	-0.0103842	0.00805286	-0.0188462	-0.0403825	-0.0345763	-0.0169545	-0.0402756	-0.0215406	-0.0312035	-0.0274923	0	0	0	0	0	0	0	0	0	0	0	0	0	0	0	0	0
0	0	0	0	0	0	0	0	0	0	0	0	0	0	0.0446831	0.0257962	0.0205918	0.0267964	0.0215561	0.0122697	0.0156843	0.0286544	0.0230331	0.00400408	-0.040625	-0.041824	-0.0433453	-0.0520412	-0.0346016	-0.048131	-0.0331466	-0.0381038	-0.0179851	0	0	0	0	0	0	0	0	0	0	0	0	0	0	0	0	0
0	0	0	0	0	0	0	0	0	0	0	0	0	0	0.0468114	0.033234	0.0200016	0.0324336	0.0229121	0.0294462	0.0216309	0.0190759	0.0254851	0.03983	0.0570368	-0.0419145	-0.0420501	-0.0401945	-0.0301053	-0.0367801	-0.0261411	-0.0152992	-0.0199236	-0.00560985	0	0	0	0	0	0	0	0	0	0	0	0	0	0	0	0
0	0	0	0	0	0	0	0	0	0	0	0	0	0	0.041012	0.0265192	0.0260811	0.0311167	0.0316445	0.0325989	0.0236637	0.0292809	0.0283006	0.0264126	1.76114e-05	-0.00748562	-0.0188781	-0.0136415	-0.0246717	-0.02756	-0.00587334	-0.00311781	-0.00921394	-0.00249484	0	0	0	0	0	0	0	0	0	0	0	0	0	0	0	0
0	0	0	0	0	0	0	0	0	0	0	0	0	0	0.0416039	0.0262798	0.0257335	0.0329149	0.0297388	0.0312812	0.0177137	0.0281319	0.0267925	0.0220561	0.0246494	0.0142698	-0.0081579	-0.0021604	-0.000526309	-0.00608753	0.0037826	0.00599011	-0.0116515	0	0	0	0	0	0	0	0	0	0	0	0	0	0	0	0	0
0	0	0	0	0	0	0	0	0	0	0	0	0	0	0.0437099	0.0436796	0.0408209	0.0303632	0.0188137	0.0133142	0.0211991	0.0263428	0.0321298	0.022177	0.00183246	-0.00251377	0.00111902	0.00771455	-0.00118456	-0.0105372	-0.0218003	-0.00846703	0	0	0	0	0	0	0	0	0	0	0	0	0	0	0	0	0	0
0	0	0	0	0	0	0	0	0	0	0	0	0	0	0	0.0498609	0.0250461	0.0263353	0.0205734	0.0186133	0.0201116	0.0200263	0.0168922	0.0161528	0.00168548	0.0204933	0.0104035	0.00769189	0.00310075	-0.0116015	-0.0109118	0	0	0	0	0	0	0	0	0	0	0	0	0	0	0	0	0	0	0
0	0	0	0	0	0	0	0	0	0	0	0	0	0	0	0.048828	0.0334652	0.0220263	0.0184918	0.0238933	0.014769	0.0128497	0.0097523	0.0130048	0.00411072	0.00514739	0.00155086	-0.00248711	-0.000408467	-0.0156907	0	0	0	0	0	0	0	0	0	0	0	0	0	0	0	0	0	0	0	0
0	0	0	0	0	0	0	0	0	0	0	0	0	0	0	0	0.0331981	0.0245415	0.0242933	0.0164313	0.0226588	0.0205346	0.0242218	0.0146554	0.000760796	0.0114418	0.00496449	0	0	0	0	0	0	0	0	0	0	0	0	0	0	0	0	0	0	0	0	0	0	0
0	0	0	0	0	0	0	0	0	0	0	0	0	0	0	0	0	0	0	0	0	0	0	0	0	0	0	0	0	0	0	0	0	0	0	0	0	0	0	0	0	0	0	0	0	0	0	0	0	0
0	0	0	0	0	0	0	0	0	0	0	0	0	0	0	0	0	0	0	0	0	0	0	0	0	0	0	0	0	0	0	0	0	0	0	0	0	0	0	0	0	0	0	0	0	0	0	0	0	0
0	0	0	0	0	0	0	0	0	0	0	0	0	0	0	0	0	0	0	0	0	0	0	0	0	0	0	0	0	0	0	0	0	0	0	0	0	0	0	0	0	0	0	0	0	0	0	0	0	0
0	0	0	0	0	0	0	0	0	0	0	0	0	0	0	0	0	0	0	0	0	0	0	0	0	0	0	0	0	0	0	0	0	0	0	0	0	0	0	0	0	0	0	0	0	0	0	0	0	0
0	0	0	0	0	0	0	0	0	0	0	0	0	0	0	0	0	0	0	0	0	0	0	0	0	0	0	0	0	0	0	0	0	0	0	0	0	0	0	0	0	0	0	0	0	0	0	0	0	0
0	0	0	0	0	0	0	0	0	0	0	0	0	0	0	0	0	0	0	0	0	0	0	0	0	0	0	0	0	0	0	0	0	0	0	0	0	0	0	0	0	0	0	0	0	0	0	0	0	0
0	0	0	0	0	0	0	0	0	0	0	0	0	0	0	0	0	0	0	0	0	0	0	0	0	0	0	0	0	0	0	0	0	0	0	0	0	0	0	0	0	0	0	0	0	0	0	0	0	0
0	0	0	0	0	0	0	0	0	0	0	0	0	0	0	0	0	0	0	0	0	0	0	0	0	0	0	0	0	0	0	0	0	0	0	0	0	0	0	0	0	0	0	0	0	0	0	0	0	0
0	0	0	0	0	0	0	0	0	0	0	0	0	0	0	0	0	0	0	0	0	0	0	0	0	0	0	0	0	0	0	0	0	0	0	0	0	0	0	0	0	0	0	0	0	0	0	0	0	0
0	0	0	0	0	0	0	0	0	0	0	0	0	0	0	0	0	0	0	0	0	0	0	0	0	0	0	0	0	0	0	0	0	0	0	0	0	0	0	0	0	0	0	0	0	0	0	0	0	0
0	0	0	0	0	0	0	0	0	0	0	0	0	0	0	0	0	0	0	0	0	0	0	0	0	0	0	0	0	0	0	0	0	0	0	0	0	0	0	0	0	0	0	0	0	0	0	0	0	0
0	0	0	0	0	0	0	0	0	0	0	0	0	0	0	0	0	0	0	0	0	0	0	0	0	0	0	0	0	0	0	0	0	0	0	0	0	0	0	0	0	0	0	0	0	0	0	0	0	0
0	0	0	0	0	0	0	0	0	0	0	0	0	0	0	0	0	0	0	0	0	0	0	0	0	0	0	0	0	0	0	0	0	0	0	0	0	0	0	0	0	0	0	0	0	0	0	0	0	0
0	0	0	0	0	0	0	0	0	0	0	0	0	0	0	0	0	0	0	0	0	0	0	0	0	0	0	0	0	0	0	0	0	0	0	0	0	0	0	0	0	0	0	0	0	0	0	0	0	0
0	0	0	0	0	0	0	0	0	0	0	0	0	0	0	0	0	0	0	0	0	0	0	0	0	0	0	0	0	0	0	0	0	0	0	0	0	0	0	0	0	0	0	0	0	0	0	0	0	0
0	0	0	0	0	0	0	0	0	0	0	0	0	0	0	0	0	0	0	0	0	0	0	0	0	0	0	0	0	0	0	0	0	0	0	0	0	0	0	0	0	0	0	0	0	0	0	0	0	0
0	0	0	0	0	0	0	0	0	0	0	0	0	0	0	0	0	0	0	0	0	0	0	0	0	0	0	0	0	0	0	0	0	0	0	0	0	0	0	0	0	0	0	0	0	0	0	0	0	0
0	0	0	0	0	0	0	0	0	0	0	0	0	0	0	0	0	0	0	0	0	0	0	0	0	0	0	0	0	0	0	0	0	0	0	0	0	0	0	0	0	0	0	0	0	0	0	0	0	0
0	0	0	0	0	0	0	0	0	0	0	0	0	0	0	0	0	0	0	0	0	0	0	0	0	0	0	0	0	0	0	0	0	0	0	0	0	0	0	0	0	0	0	0	0	0	0	0	0	0
0	0	0	0	0	0	0	0	0	0	0	0	0	0	0	0	0	0	0	0	0	0	0	0	0	0	0	0	0	0	0	0	0	0	0	0	0	0	0	0	0	0	0	0	0	0	0	0	0	0
0	0	0	0	0	0	0	0	0	0	0	0	0	0	0	0	0	0	0	0	0	0	0	0	0	0	0	0	0	0	0	0	0	0	0	0	0	0	0	0	0	0	0	0	0	0	0	0	0	0
0	0	0	0	0	0	0	0	0	0	0	0	0	0	0	0	0	0	0	0	0	0	0	0	0	0	0	0	0	0	0	0	0	0	0	0	0	0	0	0	0	0	0	0	0	0	0	0	0	0
0	0	0	0	0	0	0	0	0	0	0	0	0	0	0	0	0	0	0	0	0	0	0	0	0	0	0	0	0	0	0	0	0	0	0	0	0	0	0	0	0	0	0	0	0	0	0	0	0	0
0	0	0	0	0	0	0	0	0	0	0	0	0	0	0	0	0	0	0	0	0	0	0	0	0	0	0	0	0	0	0	0	0	0	0	0	0	0	0	0	0	0	0	0	0	0	0	0	0	0
0	0	0	0	0	0	0	0	0	0	0	0	0	0	0	0	0	0	0	0	0	0	0	0	0	0	0	0	0	0	0	0	0	0	0	0	0	0	0	0	0	0	0	0	0	0	0	0	0	0
0	0	0	0	0	0	0	0	0	0	0	0	0	0	0	0	0	0	0	0	0	0	0	0	0	0	0	0.0986137	0.0730519	0	0	0	0	0	0	0	0	0	0	0	0	0	0	0	0	0	0	0	0	0
0	0	0	0	0	0	0	0	0	0	0	0	0	0	0	0	0	0	0	0	0	0	0	0	0	0.107544	0.103362	0.0983959	0.0833003	-0.00614763	0	0	0	0	0	0	0	0	0	0	0	0	0	0	0	0	0	0	0	0
0	0	0	0	0	0	0	0	0	0	0	0	0	0	0	0	0	0	0	0	0	0	0	0	0.067373	0.0809187	0.0752531	0.0960234	0.079851	0.0300895	0.00695533	0	0	0	0	0	0	0	0	0	0	0	0	0	0	0	0	0	0	0
0	0	0	0	0	0	0	0	0	0	0	0	0	0	0	0	0	0	0	0.0445334	0.0303054	0.0260258	0.0496064	0.0711082	0.0668316	0.0648942	0.0709517	0.0880335	0.0828024	0.0499643	0.0205511	0.046346	0	0	0	0	0	0	0	0	0	0	0	0	0	0	0	0	0	0
0	0	0	0	0	0	0	0	0	0	0	0	0	0	0	0	0	0	0.0462772	0.067224	0.0847239	0.0752526	0.0643267	0.0649728	0.0718345	0.0680501	0.0762602	0.0816683	0.0833247	0.0291061	0.0249152	0.0194152	-0.00613601	0	0	0	0	0	0	0	0	0	0	0	0	0	0	0	0	0
0	0	0	0	0	0	0	0	0	0	0	0	0	0	0	0	0	0.0303554	0.0409985	0.0509177	0.0326611	0.0581725	0.0503227	0.0623692	0.0510502	0.0421476	0.0567622	0.0688337	0.0491782	0.0326067	0.019586	0.0204168	-0.0204924	0	0	0	0	0	0	0	0	0	0	0	0	0	0	0	0	0
0	0	0	0	0	0	0	0	0	0	0	0	0	0	0	0	0	0.0350021	0.0337262	0.0504225	0.0518199	0.0499362	0.0618998	0.0576712	0.0341869	0.0330188	0.0353574	0.0607729	0.039343	0.0288479	0.0205581	-0.00360303	-0.0125809	0	0	0	0	0	0	0	0	0	0	0	0	0	0	0	0	0
0	0	0	0	0	0	0	0	0	0	0	0	0	0	0	0	0.0230034	0.0464575	0.0401526	0.0519825	0.0624908	0.030607	0.0587432	0.0364039	0.0469522	0.0374755	0.0272699	0.024827	0.0162466	0.0244948	0.0551081	0.026144	-0.00995522	-0.0219806	0	0	0	0	0	0	0	0	0	0	0	0	0	0	0	0
0	0	0	0	0	0	0	0	0	0	0	0	0	0	0	0	0.0345874	0.0198729	0.00634916	0.0356986	0.0507938	0.0334377	0.0584511	0.0563502	0.0609167	0.0463456	0.0547604	0.0271754	0.0163512	-0.00875362	0.00783243	0.0264885	0.00676488	0.00359573	0	0	0	0	0	0	0	0	0	0	0	0	0	0	0	0
0	0	0	0	0	0	0	0	0	0	0	0	0	0	0	0	0.0201752	0.0217348	0.00901763	0.0113149	0.0331644	0.0522408	0.0623019	0.0438516	0.0539403	0.0425712	0.0580789	0.0397768	0.0166593	-0.0206969	0.00619879	0.0323929	8.65142e-05	-0.00503668	0	0	0	0	0	0	0	0	0	0	0	0	0	0	0	0
0	0	0	0	0	0	0	0	0	0	0	0	0	0	0	0	0.0289267	0.0128527	0.0177618	0.00900161	0.0144085	0.0246331	0.0373296	0.043991	0.0326274	0.0113919	0.0307283	0.0213066	0.000920652	-0.0118748	0.00133574	0.0117541	-0.00835656	-6.11105e-05	-0.00673746	0	0	0	0	0	0	0	0	0	0	0	0	0	0	0
0	0	0	0	0	0	0	0	0	0	0	0	0	0	0	0.0282112	0.0356817	0.022889	0.0117393	0.0529398	0.0402825	0.0429974	0.0410917	0.0320796	0.0379996	0.0442509	0.0230084	-0.00133763	0.00777999	0.00268273	-0.00692136	0.000271362	-0.010075	0.00191496	-0.00120169	0	0	0	0	0	0	0	0	0	0	0	0	0	0	0
0	0	0	0	0	0	0	0	0	0	0	0	0	0	0	-0.0161851	0.0357366	0.047294	0.079177	0.135877	0.114912	0.0886676	0.18503	0.305273	0.316468	0.320053	0.260392	0.137823	0.125417	0.101046	0.0711983	0.0747726	0.0691806	0.0627759	0.0333716	0	0	0	0	0	0	0	0	0	0	0	0	0	0	0
0	0	0	0	0	0	0	0	0	0	0	0	0	0	0.0238725	0.0201402	0.00989946	0.0257392	0.0228482	0.0208175	0.014408	0.0262804	0.0149305	0.0372472	0.0254811	0.0104835	0.00403959	0.00495282	-0.00124525	-0.0141734	-0.00580673	-0.000861573	-0.00248169	0.00760883	0.00137252	0	0	0	0	0	0	0	0	0	0	0	0	0	0	0
0	0	0	0	0	0	0	0	0	0	0	0	0	0.0383431	0.0382926	0.0330499	0.0271174	0.0241759	0.0107985	0.0216988	0.0221445	0.025127	0.0312568	0.0203514	0.00133311	0.0103845	0.0154595	0.0248819	0.0174137	0.00370942	0.00115442	0.000584835	-0.00293484	0.0171277	0.0128998	0	0	0	0	0	0	0	0	0	0	0	0	0	0	0
0	0	0	0	0	0	0	0	0	0	0	0	0	0.0270469	0.0353082	0.0305995	0.023174	0.023232	0.0154291	0.0247259	0.0251908	0.0251468	0.0213201	0.0286608	0.00364219	0.0129183	0.0173671	0.0170473	0.0200482	-0.00241955	0.001665	-0.004456	-0.000806435	0.012025	0.0122853	0	0	0	0	0	0	0	0	0	0	0	0	0	0	0
0	0	0	0	0	0	0	0	0	0	0	0	0	0.0262237	0.012698	0.0278604	0.0328507	0.0132301	0.0209245	0.0273527	0.0271303	0.0166056	0.0183292	0.0245284	0.00589646	0.0114398	-0.00200481	0.0162434	0.0189628	-0.00270424	0.0161529	0.00318761	-0.0120523	0.000784152	0.0036429	0	0	0	0	0	0	0	0	0	0	0	0	0	0	0
0	0	0	0	0	0	0	0	0	0	0	0	0	0.0233938	0.0355109	0.0362427	0.0377743	0.027627	0.0292119	0.0282175	0.0287327	0.0305006	0.0342323	0.0282528	0.0176343	0.0199012	0.0140718	0.0202389	0.0215299	0.0144319	0.0219613	0.00916148	-0.0116894	0.0174052	0.0177981	0	0	0	0	0	0	0	0	0	0	0	0	0	0	0
0	0	0	0	0	0	0	0	0	0	0	0	0	0.0308656	0.0316447	0.0263223	0.0365243	0.0335975	0.0309014	0.038953	0.031768	0.0323728	0.0348513	0.0268158	0.025897	0.010086	0.0201588	0.0248721	0.0194302	0.009921	0.0203337	0.0305475	-0.0123638	-0.00351142	0.0109854	0	0	0	0	0	0	0	0	0	0	0	0	0	0	0
0	0	0	0	0	0	0	0	0	0	0	0	0	0.0345058	0.0379455	0.0364103	0.0343319	0.0295003	0.0286953	0.0310947	0.0290675	0.0233091	0.0190833	0.0271898	0.0344808	0.0288588	0.0192873	0.0230513	0.0215233	0.00439852	0.0244659	0.0204816	0.00223474	-0.0103865	0.00718298	0	0	0	0	0	0	0	0	0	0	0	0	0	0	0
0	0	0	0	0	0	0	0	0	0	0	0	0	0.0409992	0.0380954	0.0426427	0.0435587	0.0371565	0.0345358	0.0355355	0.0336889	0.0359434	0.0278635	0.0408788	0.0355014	0.0425984	0.030342	0.0458182	0.0224933	0.0100638	0.0278593	0.0327783	0.0150963	0.00517414	-0.00162412	0	0	0	0	0	0	0	0	0	0	0	0	0	0	0
0	0	0	0	0	0	0	0	0	0	0	0	0	0	0.0478817	0.0399188	0.0472769	0.0321055	0.0276592	0.0376268	0.0291518	0.0274879	0.033121	0.0432649	0.0392897	0.0341705	0.0311937	0.0365498	0.0407356	0.0260175	0.0324084	0.0278997	0.0134818	0.01069	0	0	0	0	0	0	0	0	0	0	0	0	0	0	0	0
0	0	0	0	0	0	0	0	0	0	0	0	0	0	0	0.0503953	0.0397254	0.0352397	0.0264023	0.047977	0.0378667	0.0325933	0.0418332	0.0579404	0.0514275	0.0586874	0.0339796	0.0434138	0.0348901	0.0204085	0.0195806	0.0356849	0.0120795	0	0	0	0	0	0	0	0	0	0	0	0	0	0	0	0	0
0	0	0	0	0	0	0	0	0	0	0	0	0	0	0	0	0	0	0	0	0.0446298	0.0522973	0.0531864	0.0644662	0.0551883	0.0374397	0.0333933	0.0372912	0	0	0	0	0	0	0	0	0	0	0	0	0	0	0	0	0	0	0	0	0	0
0	0	0	0	0	0	0	0	0	0	0	0	0	0	0	0	0	0	0	0	0	0	0	0	0	0	0	0	0	0	0	0	0	0	0	0	0	0	0	0	0	0	0	0	0	0	0	0	0	0
0	0	0	0	0	0	0	0	0	0	0	0	0	0	0	0	0	0	0	0	0	0	0	0	0	0	0	0	0	0	0	0	0	0	0	0	0	0	0	0	0	0	0	0	0	0	0	0	0	0
0	0	0	0	0	0	0	0	0	0	0	0	0	0	0	0	0	0	0	0	0	0	0	0	0	0	0	0	0	0	0	0	0	0	0	0	0	0	0	0	0	0	0	0	0	0	0	0	0	0
0	0	0	0	0	0	0	0	0	0	0	0	0	0	0	0	0	0	0	0	0	0	0	0	0	0	0	0	0	0	0	0	0	0	0	0	0	0	0	0	0	0	0	0	0	0	0	0	0	0
0	0	0	0	0	0	0	0	0	0	0	0	0	0	0	0	0	0	0	0	0	0	0	0	0	0	0	0	0	0	0	0	0	0	0	0	0	0	0	0	0	0	0	0	0	0	0	0	0	0
0	0	0	0	0	0	0	0	0	0	0	0	0	0	0	0	0	0	0	0	0	0	0	0	0	0	0	0	0	0	0	0	0	0	0	0	0	0	0	0	0	0	0	0	0	0	0	0	0	0
0	0	0	0	0	0	0	0	0	0	0	0	0	0	0	0	0	0	0	0	0	0	0	0	0	0	0	0	0	0	0	0	0	0	0	0	0	0	0	0	0	0	0	0	0	0	0	0	0	0
0	0	0	0	0	0	0	0	0	0	0	0	0	0	0	0	0	0	0	0	0	0	0	0	0	0	0	0	0	0	0	0	0	0	0	0	0	0	0	0	0	0	0	0	0	0	0	0	0	0
0	0	0	0	0	0	0	0	0	0	0	0	0	0	0	0	0	0	0	0	0	0	0	0	0	0	0	0	0	0	0	0	0	0	0	0	0	0	0	0	0	0	0	0	0	0	0	0	0	0
0	0	0	0	0	0	0	0	0	0	0	0	0	0	0	0	0	0	0	0	0	0	0	0	0	0	0	0	0	0	0	0	0	0	0	0	0	0	0	0	0	0	0	0	0	0	0	0	0	0
0	0	0	0	0	0	0	0	0	0	0	0	0	0	0	0	0	0	0	0	0	0	0	0	0	0	0	0	0	0	0	0	0	0	0	0	0	0	0	0	0	0	0	0	0	0	0	0	0	0
0	0	0	0	0	0	0	0	0	0	0	0	0	0	0	0	0	0	0	0	0	0	0	0	0	0	0	0	0	0	0	0	0	0	0	0	0	0	0	0	0	0	0	0	0	0	0	0	0	0
0	0	0	0	0	0	0	0	0	0	0	0	0	0	0	0	0	0	0	0	0	0	0	0	0	0	0	0	0	0	0	0	0	0	0	0	0	0	0	0	0	0	0	0	0	0	0	0	0	0
0	0	0	0	0	0	0	0	0	0	0	0	0	0	0	0	0	0	0	0	0	0	0	0	0	0	0	0	0	0	0	0	0	0	0	0	0	0	0	0	0	0	0	0	0	0	0	0	0	0
0	0	0	0	0	0	0	0	0	0	0	0	0	0	0	0	0	0	0	0	0	0	0	0	0	0	0	0	0	0	0	0	0	0	0	0	0	0	0	0	0	0	0	0	0	0	0	0	0	0
0	0	0	0	0	0	0	0	0	0	0	0	0	0	0	0	0	0	0	0	0	0	0	0	0	0	0	0	0	0	0	0	0	0	0	0	0	0	0	0	0	0	0	0	0	0	0	0	0	0
0	0	0	0	0	0	0	0	0	0	0	0	0	0	0	0	0	0	0	0	0	0	0	0	0	0	0	0	0	0	0	0	0	0	0	0	0	0	0	0	0	0	0	0	0	0	0	0	0	0
0	0	0	0	0	0	0	0	0	0	0	0	0	0	0	0	0	0	0	0	0	0	0	0	0	0	0	0	0	0	0	0	0	0	0	0	0	0	0	0	0	0	0	0	0	0	0	0	0	0
0	0	0	0	0	0	0	0	0	0	0	0	0	0	0	0	0	0	0	0	0	0	0	0	0	0	0	0	0	0	0	0	0	0	0	0	0	0	0	0	0	0	0	0	0	0	0	0	0	0
0	0	0	0	0	0	0	0	0	0	0	0	0	0	0	0	0	0	0	0	0	0	0	0	0	0	0	0	0	0	0	0	0	0	0	0	0	0	0	0	0	0	0	0	0	0	0	0	0	0
0	0	0	0	0	0	0	0	0	0	0	0	0	0	0	0	0	0	0	0	0	0	0	0	0	0	0	0	0	0	0	0	0	0	0	0	0	0	0	0	0	0	0	0	0	0	0	0	0	0
0	0	0	0	0	0	0	0	0	0	0	0	0	0	0	0	0	0	0	0	0	0	0	0	0	0	0	0	0	0	0	0	0	0	0	0	0	0	0	0	0	0	0	0	0	0	0	0	0	0
0	0	0	0	0	0	0	0	0	0	0	0	0	0	0	0	0	0	0	0	0	0	0	0	0	0	0	0	0	0	0	0	0	0	0	0	0	0	0	0	0	0	0	0	0	0	0	0	0	0
0	0	0	0	0	0	0	0	0	0	0	0	0	0	0	0	0	0	0	0	0	0	0	0	0	0	0	0	0	0	0	0	0	0	0	0	0	0	0	0	0	0	0	0	0	0	0	0	0	0
0	0	0	0	0	0	0	0	0	0	0	0	0	0	0	0	0	0	0	0	0	0	0	0	0	0	0	0	0	0	0	0	0	0	0	0	0	0	0	0	0	0	0	0	0	0	0	0	0	0
0	0	0	0	0	0	0	0	0	0	0	0	0	0	0	0	0	0	0	0	0	0	0	0	0	0	0	0	0	0	0	0	0	0	0	0	0	0	0	0	0	0	0	0	0	0	0	0	0	0
0	0	0	0	0	0	0	0	0	0	0	0	0	0	0	0	0	0	0	0	0	0	0	0	0	0	0	0	0	0	0	0	0	0	0	0	0	0	0	0	0	0	0	0	0	0	0	0	0	0
0	0	0	0	0	0	0	0	0	0	0	0	0	0	0	0	0	0	0	0	0	0	0	0	0	0	0	0	0	0	0	0	0	0	0	0	0	0	0	0	0	0	0	0	0	0	0	0	0	0
0	0	0	0	0	0	0	0	0	0	0	0	0	0	0	0	0	0	0	0	0	0	0	0	0	0	0	0	0	0	0	0	0	0	0	0	0	0	0	0	0	0	0	0	0	0	0	0	0	0
0	0	0	0	0	0	0	0	0	0	0	0	0	0	0	0	0	0	0	0	0	0	0	0	0	0	-0.0106786	-0.0283613	-0.0429973	-0.0301977	-0.00357305	0.000714331	-0.0264367	-0.0441567	-0.0596601	0	0	0	0	0	0	0	0	0	0	0	0	0	0	0
0	0	0	0	0	0	0	0	0	0	0	0	0	0	0	0	0	0	0	0	0	0	0	0	0.0304215	0.0235085	0.0222508	0.0201719	0.0192315	0.00576269	0.0276	0.0244676	0.0111727	0.0194059	0.0141349	-0.00531397	0	0	0	0	0	0	0	0	0	0	0	0	0	0
0	0	0	0	0	0	0	0	0	0	0	0	0	0	0	0	0	0	0	0	0	0	0.0368468	0.02472	0.0211102	0.0298437	0.00532732	0.0134765	0.0338369	0.0146784	0.017205	0.0109149	-0.00204319	0.016519	0.014035	0.00327546	-0.0150231	-0.00488478	0	0	0	0	0	0	0	0	0	0	0	0
0	0	0	0	0	0	0	0	0	0	0	0	0	0	0	0	0	0	0	0	0	0.0259777	0.0160466	0.0140681	0.015161	0.00656732	-0.00833705	0.0031971	0.00275822	0.0210201	0.0387987	0.0332568	0.00589217	0.0120323	0.00404447	-0.00148258	0.0122842	-0.00893485	-0.0109101	0	0	0	0	0	0	0	0	0	0	0
0	0	0	0	0	0	0	0	0	0	0	0	0	0	0	0	0	0	0	0	0.0264247	0.0213263	0.0231523	0.000501876	0.00439543	-0.00625992	-0.0158956	-0.000127277	-0.0177704	-0.0229782	-0.00923012	0.0274071	0.0151807	0.0159103	0.0244486	0.00173474	0.0129036	0.00274444	-0.0175693	0.000605016	0	0	0	0	0	0	0	0	0	0
0	0	0	0	0	0	0	0	0	0	0	0	0	0	0	0	0	0	0	0.0291983	0.0267887	0.00990412	0.00272906	-0.00435204	0.00265571	-0.0317096	-0.0253491	-0.0113612	-0.0200605	-0.0372042	-0.0269453	-0.00120852	0.00831485	0.026985	0.0191111	0.00974621	0.000891689	0.0109508	-0.00450063	-0.0175876	0	0	0	0	0	0	0	0	0	0
0	0	0	0	0	0	0	0	0	0	0	0	0	0	0	0	0	0	0.017784	0.0223296	0.0141788	-0.00654239	-0.0081008	-0.0281255	-0.0319108	-0.0249949	-0.0184002	-0.0198086	-0.00362364	-0.0235877	-0.0288228	-0.0106856	0.00590246	0.0346791	0.0159364	0.00213438	0.00830773	0.00913619	0.000336956	-0.00713504	0	0	0	0	0	0	0	0	0	0
0	0	0	0	0	0	0	0	0	0	0	0	0	0	0	0	0	0.0915245	0.0728747	0.0489124	-0.000851814	-0.0344884	-0.038671	-0.00862108	0.0113322	-0.00608684	-0.0336276	-0.0389606	-0.0302096	-0.0292726	-0.0357051	-0.0136835	-0.0255228	-0.000421275	-0.000726956	0.00248417	0.0118503	0.00228299	0.000776345	-0.0196625	-0.00455151	0	0	0	0	0	0	0	0	0
0	0	0	0	0	0	0	0	0	0	0	0	0	0	0	0	0.0334099	-0.0268442	-0.0157822	-0.0172612	-0.0216615	-0.0509234	-0.0389788	-0.0279429	-0.0338593	-0.025167	-0.0380281	-0.0280863	-0.0294564	-0.0490881	-0.03206	-0.0214495	-0.0169756	0.0215396	0.00492303	0.0126899	0.014382	0.00137598	0.00386914	0.00228493	-0.0021949	0	0	0	0	0	0	0	0	0
0	0	0	0	0	0	0	0	0	0	0	0	0	0	0	0.0293989	0.00869878	-0.00615413	0.00116438	-0.0240682	-0.0299701	-0.0273626	-0.0302279	-0.0368109	-0.0338222	-0.0343312	-0.0287768	-0.0292345	-0.0379814	-0.0472106	-0.0311316	-0.015841	-0.00245848	0.00680558	0.00920483	0.0115667	0.00673039	0.00844783	0.00878679	0.000909829	0	0	0	0	0	0	0	0	0	0
0	0	0	0	0	0	0	0	0	0	0	0	0	0	0	0.0323662	-0.00561925	-0.0124855	-0.0284157	-0.030008	-0.0268728	-0.0288194	-0.0374654	-0.0215738	-0.0464171	-0.0306568	-0.0436951	-0.0375279	-0.039772	-0.0506687	-0.00963298	0.00307892	-0.00798395	0.00420402	0.00818519	0.0092361	0.00859623	0.000302317	-0.0043583	-0.000429646	0	0	0	0	0	0	0	0	0	0
0	0	0	0	0	0	0	0	0	0	0	0	0	0	0	0.0263476	0.0112254	-0.00699141	-0.0202603	-0.00331248	-0.0132775	-0.0256783	-0.0426226	-0.0215703	-0.0435381	-0.0370928	-0.0631491	-0.05527	-0.0563877	-0.0372614	0.00212663	-7.52612e-05	0.000461618	0.0286496	0.006543	-0.00857735	-0.00405788	-0.00159221	0.0120577	0	0	0	0	0	0	0	0	0	0	0
0	0	0	0	0	0	0	0	0	0	0	0	0	0	0	0.0307467	0.00902563	0.0203632	0.00948517	0.00502864	-0.0012055	-0.035136	-0.0481826	-0.0417159	-0.0595378	-0.0642884	-0.0628525	-0.0494193	-0.0509455	-0.0225606	0.00931926	0.0206757	0.00909471	0.016045	-0.002083	-0.000562578	0.00363618	0.0135144	0.014555	0	0	0	0	0	0	0	0	0	0	0
0	0	0	0	0	0	0	0	0	0	0	0	0	0	0	0	0.0573568	0.0264798	0.0125093	0.026143	0.0100993	-0.0238265	-0.0446536	-0.042949	-0.0549411	-0.0563486	-0.0568022	-0.0290344	-0.00485019	-0.0137	0.0194565	0.0303912	0.0138754	0.00155689	0.00625335	-0.00156468	0.00782688	0	0	0	0	0	0	0	0	0	0	0	0	0
0	0	0	0	0	0	0	0	0	0	0	0	0	0	0	0	0.0537212	0.0646638	0.0383341	0.0489586	0.0150887	-0.0274983	-0.0534535	-0.0696971	-0.0704104	-0.0388555	-0.0356886	-0.00762572	0.000539124	0.00168056	0.0190613	0.015359	-0.00745177	0	0	0	0	0	0	0	0	0	0	0	0	0	0	0	0	0
0	0	0	0	0	0	0	0	0	0	0	0	0	0	0	0	0	0.0504976	0.0532231	-0.00529864	0.0308688	-0.0301514	-0.0291258	-0.0332152	-0.0210839	0.00452699	0.0111007	0.0248417	0.0208161	0.00260502	0.0218376	0	0	0	0	0	0	0	0	0	0	0	0	0	0	0	0	0	0	0
0	0	0	0	0	0	0	0	0	0	0	0	0	0	0	0	0	0	0	0	0.0380438	-0.0124146	-0.00899666	-0.000385333	0.0149347	0.0311832	0.017216	0	0	0	0	0	0	0	0	0	0	0	0	0	0	0	0	0	0	0	0	0	0	0
0	0	0	0	0	0	0	0	0	0	0	0	0	0	0	0	0	0	0	0	0	0	0	0	0	0	0	0	0	0	0	0	0	0	0	0	0	0	0	0	0	0	0	0	0	0	0	0	0	0
0	0	0	0	0	0	0	0	0	0	0	0	0	0	0	0	0	0	0	0	0	0	0	0	0	0	0	0	0	0	0	0	0	0	0	0	0	0	0	0	0	0	0	0	0	0	0	0	0	0
0	0	0	0	0	0	0	0	0	0	0	0	0	0	0	0	0	0	0	0	0	0	0	0	0	0	0	0	0	0	0	0	0	0	0	0	0	0	0	0	0	0	0	0	0	0	0	0	0	0
0	0	0	0	0	0	0	0	0	0	0	0	0	0	0	0	0	0	0	0	0	0	0	0	0	0	0	0	0	0	0	0	0	0	0	0	0	0	0	0	0	0	0	0	0	0	0	0	0	0
0	0	0	0	0	0	0	0	0	0	0	0	0	0	0	0	0	0	0	0	0	0	0	0	0	0	0	0	0	0	0	0	0	0	0	0	0	0	0	0	0	0	0	0	0	0	0	0	0	0
0	0	0	0	0	0	0	0	0	0	0	0	0	0	0	0	0	0	0	0	0	0	0	0	0	0	0	0	0	0	0	0	0	0	0	0	0	0	0	0	0	0	0	0	0	0	0	0	0	0
0	0	0	0	0	0	0	0	0	0	0	0	0	0	0	0	0	0	0	0	0	0	0	0	0	0	0	0	0	0	0	0	0	0	0	0	0	0	0	0	0	0	0	0	0	0	0	0	0	0
0	0	0	0	0	0	0	0	0	0	0	0	0	0	0	0	0	0	0	0	0	0	0	0	0	0	0	0	0	0	0	0	0	0	0	0	0	0	0	0	0	0	0	0	0	0	0	0	0	0
0	0	0	0	0	0	0	0	0	0	0	0	0	0	0	0	0	0	0	0	0	0	0	0	0	0	0	0	0	0	0	0	0	0	0	0	0	0	0	0	0	0	0	0	0	0	0	0	0	0
0	0	0	0	0	0	0	0	0	0	0	0	0	0	0	0	0	0	0	0	0	0	0	0	0	0	0	0	0	0	0	0	0	0	0	0	0	0	0	0	0	0	0	0	0	0	0	0	0	0
0	0	0	0	0	0	0	0	0	0	0	0	0	0	0	0	0	0	0	0	0	0	0	0	0	0	0	0	0	0	0	0	0	0	0	0	0	0	0	0	0	0	0	0	0	0	0	0	0	0
0	0	0	0	0	0	0	0	0	0	0	0	0	0	0	0	0	0	0	0	0	0	0	0	0	0	0	0	0	0	0	0	0	0	0	0	0	0	0	0	0	0	0	0	0	0	0	0	0	0
0	0	0	0	0	0	0	0	0	0	0	0	0	0	0	0	0	0	0	0	0	0	0	0	0	0	0	0	0	0	0	0	0	0	0	0	0	0	0	0	0	0	0	0	0	0	0	0	0	0
0	0	0	0	0	0	0	0	0	0	0	0	0	0	0	0	0	0	0	0	0	0	0	0	0	0	0	0	0	0	0	0	0	0	0	0	0	0	0	0	0	0	0	0	0	0	0	0	0	0
0	0	0	0	0	0	0	0	0	0	0	0	0	0	0	0	0	0	0	0	0	0	0	0	0	0	0	0	0	0	0	0	0	0	0	0	0	0	0	0	0	0	0	0	0	0	0	0	0	0
0	0	0	0	0	0	0	0	0	0	0	0	0	0	0	0	0	0	0	0	0	0	0	0	0	0	0	0	0	0	0	0	0	0	0	0	0	0	0	0	0	0	0	0	0	0	0	0	0	0
0	0	0	0	0	0	0	0	0	0	0	0	0	0	0	0	0	0	0	0	0	0	0	0	0	0	0	0	0	0	0	0	0	0	0	0	0	0	0	0	0	0	0	0	0	0	0	0	0	0
0	0	0	0	0	0	0	0	0	0	0	0	0	0	0	0	0	0	0	0	0	0	0	0	0	0	0	0	0	0	0	0	0	0	0	0	0	0	0	0	0	0	0	0	0	0	0	0	0	0
0	0	0	0	0	0	0	0	0	0	0	0	0	0	0	0	0	0	0	0	0	0	0	0	0	0	0	0	0	0	0	0	0	0	0	0	0	0	0	0	0	0	0	0	0	0	0	0	0	0
0	0	0	0	0	0	0	0	0	0	0	0	0	0	0	0	0	0	0	0	0	0	0	0	0	0	0	0	0	0	0	0	0	0	0	0	0	0	0	0	0	0	0	0	0	0	0	0	0	0
0	0	0	0	0	0	0	0	0	0	0	0	0	0	0	0	0	0	0	0	0	0	0	0	0	0	0	0	0	0	0	0	0	0	0	0	0	0	0	0	0	0	0	0	0	0	0	0	0	0
0	0	0	0	0	0	0	0	0	0	0	0	0	0	0	0	0	0	0	0.119162	0.0975409	0.040283	0	0	0	0	0	0	0	0	0	0	0	0	0	0	0	0	0	0	0	0	0	0	0	0	0	0	0	0
0	0	0	0	0	0	0	0	0	0	0	0	0	0	0	0	0	0	0	0.121361	0.0933567	0.100056	0.0557173	0	0	0	0	0	0	0	0	0	0	0	0	0	0	0	0	0	0	0	0	0	0	0	0	0	0	0
0	0	0	0	0	0	0	0	0	0	0	0	0	0	0	0	0	0	0.0937626	0.0926083	0.0510149	0.0726662	0.0732693	0.0724556	0.0797269	0.0757453	0.0443495	0.0391577	0.00957755	0.00913613	-0.00122057	0	0	0	0	0	0	0	0	0	0	0	0	0	0	0	0	0	0	0
0	0	0	0	0	0	0	0	0	0	0	0	0	0	0	0	0	-0.334206	-0.125159	-0.049114	-0.0654499	-0.0333414	-0.0700718	0.00667314	0.085789	0.0379447	-0.0315983	-0.0619025	-0.0953469	-0.229709	-0.304846	-0.237492	0	0	0	0	0	0	0	0	0	0	0	0	0	0	0	0	0	0
0	0	0	0	0	0	0	0	0	0	0	0	0	0	0	0.050711	0.0533922	0.0676182	0.0748616	0.053096	0.0644572	0.0529544	0.0288459	0.0407956	0.0782827	0.0650754	0.0304954	0.0201621	0.0179773	0.0276291	0.0411937	0.0105144	-0.0207109	-0.020815	0	0	0	0	0	0	0	0	0	0	0	0	0	0	0	0
0	0	0	0	0	0	0	0	0	0	0	0	0	0	0.054427	0.0500902	0.054507	0.0755152	0.0659233	0.0604969	0.0383995	0.0600939	0.0614733	0.0751752	0.0671055	0.0645208	0.0296425	0.00764998	-0.0036781	0.0172121	0.0286644	0.0188278	0.00060151	0.00361022	0	0	0	0	0	0	0	0	0	0	0	0	0	0	0	0
0	0	0	0	0	0	0	0	0	0	0	0	0	0.0464651	0.0463619	0.0538742	0.0378499	0.0566964	0.0654338	0.0375735	0.0397543	0.0649981	0.0507581	0.0439192	0.0352835	0.0428505	0.010582	0.00601151	0.0111561	0.000264238	0.0245637	0.0153026	-0.0149583	0.007252	0.00504903	0	0	0	0	0	0	0	0	0	0	0	0	0	0	0
0	0	0	0	0	0	0	0	0	0	0	0	0	0	0.0402956	0.0538257	0.0467595	0.0510389	0.0695978	0.0518648	0.0376515	0.0515342	0.0469928	0.0525649	0.0214897	0.0543944	0.00539098	0.00567766	0.0118929	0.00484389	0.00738153	0.0119646	-0.00995244	0.00974929	0.00400439	0	0	0	0	0	0	0	0	0	0	0	0	0	0	0
0	0	0	0	0	0	0	0	0	0	0	0	0	0.0218125	0.0349221	0.0286631	0.0577909	0.0898865	0.0588388	0.0438713	0.0377881	0.0337132	0.0395416	0.0558363	0.0830661	0.12713	0.10442	0.0527282	0.0261971	0.00246296	0.0235303	0.03384	0.0100957	0.00728566	-0.0016074	0	0	0	0	0	0	0	0	0	0	0	0	0	0	0
0	0	0	0	0	0	0	0	0	0	0	0	0	0.0342144	0.0345499	0.0366672	0.0216193	0.0640352	0.0631249	0.0679638	0.0603576	0.0608803	0.0442148	0.0354814	0.0232626	0.015651	-0.0038744	0.0169425	0.00737455	0.00327297	0.00830851	0.0181969	0.00149669	0.000398312	0.00399506	-0.0098573	0	0	0	0	0	0	0	0	0	0	0	0	0	0
0	0	0	0	0	0	0	0	0	0	0	0	0	0.0346762	0.0420263	0.0383435	0.0461982	0.0639725	0.0560518	0.0566397	0.0406154	0.056029	0.0256712	0.0205728	0.0242522	0.0037653	0.0135423	0.0308512	0.011272	0.00743964	0.0120576	0.0269759	0.000455271	0.0154396	0.00379167	0.0058077	0	0	0	0	0	0	0	0	0	0	0	0	0	0
0	0	0	0	0	0	0	0	0	0	0	0	0.0321895	0.0315079	0.0296954	0.0279946	0.0277939	0.0381145	0.0172245	0.0252224	0.0299814	0.0392583	0.040949	0.0334281	0.00995875	0.0172526	0.0166363	0.0119193	0.0189056	0.00131132	0.0135594	0.0213724	0.000127888	0.0114858	0.0213254	0.00830712	0	0	0	0	0	0	0	0	0	0	0	0	0	0
0	0	0	0	0	0	0	0	0	0	0	0	0.0357851	0.0251786	0.0367068	0.0248595	0.0336494	0.0246584	0.0253658	0.0389731	0.0330755	0.0252337	0.0263176	0.0323626	0.0271376	0.0352368	0.0254031	0.0229803	0.0206447	0.00782939	0.021328	0.0146791	0.00714645	0.0199539	0.0081056	0.0136701	0	0	0	0	0	0	0	0	0	0	0	0	0	0
0	0	0	0	0	0	0	0	0	0	0	0	0.0379218	0.0157841	0.0322999	0.0303294	0.0279862	0.0280692	0.0181119	0.025244	0.0258993	0.0301227	0.0339659	0.0182094	0.0128049	0.0219792	0.0238761	0.0352505	0.0282995	0.0136668	0.0154756	0.0199282	0.00467304	0.0208048	0.0176742	0.00857646	0	0	0	0	0	0	0	0	0	0	0	0	0	0
0	0	0	0	0	0	0	0	0	0	0	0	0.0310866	0.0326688	0.0313022	0.0255164	0.0292545	0.0244367	0.034211	0.0239447	0.0288642	0.0321724	0.0394052	0.0205726	0.0281881	0.0292507	0.0259808	0.0227899	0.0261944	0.00398796	0.021537	0.023726	0.00658033	0.0177142	0.0179617	0.00854588	0.0100117	0	0	0	0	0	0	0	0	0	0	0	0	0
0	0	0	0	0	0	0	0	0	0	0	0	0.0300857	0.0359388	0.0193903	0.0326077	0.0178106	0.0190252	0.0229804	0.0323358	0.0387925	0.0469388	0.0431254	0.0371632	0.0268404	0.0156859	0.0189379	0.0435736	0.0288561	0.0152655	0.0266032	0.0235853	0.0132975	0.0116616	0.0121773	0.0187321	0	0	0	0	0	0	0	0	0	0	0	0	0	0
0	0	0	0	0	0	0	0	0	0	0	0	-0.0368621	-0.010194	0.030806	0.0337955	0.0239419	0.0218031	-0.00247877	0.0135575	0.011437	-0.0319702	-0.0661528	-0.0338554	0.000521156	0.0481266	0.0470342	0.0331748	0.0236878	0.0135142	0.0298068	0.0176512	0.0136076	0.0269954	0.0243874	0.0283029	0	0	0	0	0	0	0	0	0	0	0	0	0	0
0	0	0	0	0	0	0	0	0	0	0	0	0.0252719	0.0289695	0.0310103	0.0368894	0.0188202	0.0205562	0.0205418	0.0230799	0.0222299	0.0340114	0.037988	0.028424	0.0135543	0.0262237	0.0242112	0.0353332	0.0304516	0.0105494	0.0338846	0.032593	0.0133722	0.0120833	0.0167165	0	0	0	0	0	0	0	0	0	0	0	0	0	0	0
0	0	0	0	0	0	0	0	0	0	0	0	0.0391274	0.015618	0.045918	0.0391334	0.0218535	0.0285555	0.0197303	0.00819307	0.0343773	0.0300813	0.0321872	0.0275803	0.0266244	0.0395814	0.0303941	0.0243959	0.0310606	0.0154033	0.025598	0.0203693	0.00625673	0.0255612	0.00872499	0	0	0	0	0	0	0	0	0	0	0	0	0	0	0
0	0	0	0	0	0	0	0	0	0	0	0	0.0448235	0.0248007	0.0357709	0.0329896	0.0322701	0.0275478	0.0159978	0.0268576	0.0339496	0.0360956	0.0358994	0.0421399	0.0208417	0.016541	0.0221825	0.036448	0.0277886	0.010477	0.0208707	0.0239904	0.00743558	0.0163274	0	0	0	0	0	0	0	0	0	0	0	0	0	0	0	0
0	0	0	0	0	0	0	0	0	0	0	0	0	0.0404028	0.0407016	0.0462816	0.0365381	0.0322983	0.029875	0.0346083	0.0284887	0.0399815	0.0405845	0.0330754	0.0232699	0.041472	0.0334619	0.0370227	0.0320707	0.0159461	0.030541	0.0253875	0.0145806	0.0182182	0	0	0	0	0	0	0	0	0	0	0	0	0	0	0	0
0	0	0	0	0	0	0	0	0	0	0	0	0	0	0.043971	0.0407626	0.0346582	0.0343174	0.0229131	0.0230224	0.0369711	0.0313356	0.0376395	0.0312921	0.0269777	0.0337785	0.0331608	0.0426905	0.0307732	0.0313527	0.0268803	0.0288998	0	0	0	0	0	0	0	0	0	0	0	0	0	0	0	0	0	0
0	0	0	0	0	0	0	0	0	0	0	0	0	0	0	0	0.0430921	0.0449981	0.0542179	0.0555048	0.0451025	0.0616161	0.0539377	0.0543979	0.0377266	0.0331849	0.0456208	0.0536156	0.0346975	0	0	0	0	0	0	0	0	0	0	0	0	0	0	0	0	0	0	0	0	0
0	0	0	0	0	0	0	0	0	0	0	0	0	0	0	0	0	0.0413892	0.0384355	0.0398791	0.0431726	0.0432453	0.0437653	0.0414376	0.0315824	0.0402546	0.0337799	0	0	0	0	0	0	0	0	0	0	0	0	0	0	0	0	0	0	0	0	0	0	0
0	0	0	0	0	0	0	0	0	0	0	0	0	0	0	0	0	0	0	0	0	0	0	0	0	0	0	0	0	0	0	0	0	0	0	0	0	0	0	0	0	0	0	0	0	0	0	0	0	0
0	0	0	0	0	0	0	0	0	0	0	0	0	0	0	0	0	0	0	0	0	0	0	0	0	0	0	0	0	0	0	0	0	0	0	0	0	0	0	0	0	0	0	0	0	0	0	0	0	0
0	0	0	0	0	0	0	0	0	0	0	0	0	0	0	0	0	0	0	0	0	0	0	0	0	0	0	0	0	0	0	0	0	0	0	0	0	0	0	0	0	0	0	0	0	0	0	0	0	0
0	0	0	0	0	0	0	0	0	0	0	0	0	0	0	0	0	0	0	0	0	0	0	0	0	0	0	0	0	0	0	0	0	0	0	0	0	0	0	0	0	0	0	0	0	0	0	0	0	0
0	0	0	0	0	0	0	0	0	0	0	0	0	0	0	0	0	0	0	0	0	0	0	0	0	0	0	0	0	0	0	0	0	0	0	0	0	0	0	0	0	0	0	0	0	0	0	0	0	0
0	0	0	0	0	0	0	0	0	0	0	0	0	0	0	0	0	0	0	0	0	0	0	0	0	0	0	0	0	0	0	0	0	0	0	0	0	0	0	0	0	0	0	0	0	0	0	0	0	0
0	0	0	0	0	0	0	0	0	0	0	0	0	0	0	0	0	0	0	0	0	0	0	0	0	0	0	0	0	0	0	0	0	0	0	0	0	0	0	0	0	0	0	0	0	0	0	0	0	0
0	0	0	0	0	0	0	0	0	0	0	0	0	0	0	0	0	0	0	0	0	0	0	0	0	0	0	0	0	0	0	0	0	0	0	0	0	0	0	0	0	0	0	0	0	0	0	0	0	0
0	0	0	0	0	0	0	0	0	0	0	0	0	0	0	0	0	0	0	0	0	0	0	0	0	0	0	0	0	0	0	0	0	0	0	0	0	0	0	0	0	0	0	0	0	0	0	0	0	0
0	0	0	0	0	0	0	0	0	0	0	0	0	0	0	0	0	0	0	0	0	0	0	0	0	0	0	0	0	0	0	0	0	0	0	0	0	0	0	0	0	0	0	0	0	0	0	0	0	0
0	0	0	0	0	0	0	0	0	0	0	0	0	0	0	0	0	0	0	0	0	0	0	0	0	0	0	0	0	0	0	0	0	0	0	0	0	0	0	0	0	0	0	0	0	0	0	0	0	0
0	0	0	0	0	0	0	0	0	0	0	0	0	0	0	0	0	0	0	0	0	0	0	0	0	0	0	0	0	0	0	0	0	0	0	0	0	0	0	0	0	0	0	0	0	0	0	0	0	0
0	0	0	0	0	0	0	0	0	0	0	0	0	0	0	0	0	0	0	0	0	0	0	0	0	0	0	0	0	0	0	0	0	0	0	0	0	0	0	0	0	0	0	0	0	0	0	0	0	0
0	0	0	0	0	0	0	0	0	0	0	0	0	0	0	0	0	0	0	0	0	0	0	0	0	0	0	0	0	0	0	0	0	0	0	0	0	0	0	0	0	0	0	0	0	0	0	0	0	0
0	0	0	0	0	0	0	0	0	0	0	0	0	0	0	0	0	0	0	0	0	0	0	0	0	0	0	0	0	0	0	0	0	0	0	0	0	0	0	0	0	0	0	0	0	0	0	0	0	0
0	0	0	0	0	0	0	0	0	0	0	0	0	0	0	0	0	0	0	0	0	0	0	0	0	0	0	0	0	0	0	0	0	0	0	0	0	0	0	0	0	0	0	0	0	0	0	0	0	0
0	0	0	0	0	0	0	0	0	0	0	0	0	0	0	0	0	0	0	0	0	0	0	0	0	0	0	0	0	0	0	0	0	0	0	0	0	0	0	0	0	0	0	0	0	0	0	0	0	0
0	0	0	0	0	0	0	0	0	0	0	0	0	0	0	0	0	0	0	0	0	0	0	0	0	0	0	0	0	0	0	0	0	0	0	0	0	0	0	0	0	0	0	0	0	0	0	0	0	0
0	0	0	0	0	0	0	0	0	0	0	0	0	0	0	0	0	0	0	0	0	0	0	0	0	0	0	0	0	0	0	0	0	0	0	0	0	0	0	0	0	0	0	0	0	0	0	0	0	0
0	0	0	0	0	0	0	0	0	0	0	0	0	0	0	0	0	0	0	0	0	0	0	0	0	0	0	0	0	0	0	0	0	0	0	0	0	0	0	0	0	0	0	0	0	0	0	0	0	0
0	0	0	0	0	0	0	0	0	0	0	0	0	0	0	0	0	0	0	0	0	0	0	0	0	0	0	0	0	0	0	0	0	0	0	0	0	0	0	0	0	0	0	0	0	0	0	0	0	0
0	0	0	0	0	0	0	0	0	0	0	0	0	0	0	0	0	0	0	0	0	0	0	0	0	0	0	0	0	0	0	0	0	0	0	0	0	0	0	0	0	0	0	0	0	0	0	0	0	0
0	0	0	0	0	0	0	0	0	0	0	0	0	0	0	0	0	0	0	0	0	0	0	0	0	0	0	0	0	0	0	0	0	0	0	0	0	0	0	0	0	0	0	0	0	0	0	0	0	0
0	0	0	0	0	0	0	0	0	0	0	0	0	0	0	0	0	0	0	0	0	0	0	0	0	0	0	0	0	0	0	0	0	0	0	0	0	0	0	0	0	0	0	0	0	0	0	0	0	0
0	0	0	0	0	0	0	0	0	0	0	0	0	0	0	0	0	0	0	0	0	0	0	0	0	0	0	0	0	0	0	0	0	0	0	0	0	0	0	0	0	0	0	0	0	0	0	0	0	0
0	0	0	0	0	0	0	0	0	0	0	0	0	0	0	0	0	0	0	0	0	0	0	0	0	0	0	0	0	0	0	0	0	0	0	0	0	0	0	0	0	0	0	0	0	0	0	0	0	0
0	0	0	0	0	0	0	0	0	0	0	0	0	0	0	0	0	0	0	0	0	0	0	0	0	0	0	0	0	0	0	0	0	0	0	0	0	0	0	0	0	0	0	0	0	0	0	0	0	0
0	0	0	0	0	0	0	0	0	0	0	0	0	0	0	0	0	0	0	0	0	0	0	0	0	0	0	0	0	0	0	0	0	0.0278434	0.0302245	0.0181336	0.029071	0.0237833	0.0319993	0.0266764	0.0192285	0.00379551	-0.0050565	0	0	0	0	0	0	0
0	0	0	0	0	0	0	0	0	0	0	0	0	0	0	0	0	0	0	0	0	0	0	0	0	0	0	0	0	0	0.0127973	0.0106336	0.00160093	0.022759	0.0227687	0.00862962	0.0206975	0.0103618	0.0171986	0.0324101	0.0219837	0.00392124	0.0124295	0.0124534	-0.00190511	-0.00187678	0	0	0	0
0	0	0	0	0	0	0	0	0	0	0	0	0	0	0	0	0	0	0	0	0	0	0	0	0	0	0	0	0.0210012	0.0132001	0.0148164	0.0126623	0.00297887	0.0191133	0.0158335	0.0162564	0.0160342	-0.00425687	0.0068424	0.00901408	0.00881898	0.0129319	0.00291707	0.0188405	0.00920781	0.00406037	0.00328518	-0.016914	0	0
0	0	0	0	0	0	0	0	0	0	0	0	0	0	0	0	0	0	0	0	0	0	0	0	0	0	0	0	0.020501	0.004207	0.0239667	0.0239754	0.00935127	0.021742	0.0248504	0.0203246	0.0122351	0.0135479	0.0187913	0.0130741	0.0179735	0.0239668	0.0113465	0.0407045	0.0118284	-0.00244756	-0.0124142	-0.00484561	0	0
0	0	0	0	0	0	0	0	0	0	0	0	0	0	0	0	0	0	0	0	0	0	0	0	0	0	0	0.0245228	0.0155044	0.00495462	0.024303	0.0212358	-0.019343	0.0109224	0.0258528	0.00927369	0.0232832	0.0114551	-0.000100646	0.00839037	0.00809547	0.00837465	0.00738942	0.0273636	0.0153836	0.00652266	-0.0134478	-0.0126925	-0.0300351	0
0	0	0	0	0	0	0	0	0	0	0	0	0	0	0	0	0	0	0	0	0	0	0	0	0	0	0.0164468	0.01116	0.0121169	-0.00306945	0.0155002	0.00691725	-0.0124782	0.00964254	0.0173821	0.0159478	0.009424	0.000103153	-0.0157893	-0.0132143	-0.0127915	0.00831954	0.0125997	0.0326832	0.0196451	-0.0028206	-0.00770364	-0.0109557	-0.0164443	0
0	0	0	0	0	0	0	0	0	0	0	0	0	0	0	0	0	0	0	0	0	0	0	0	0	-0.0627522	-0.0458775	-0.0517009	-0.0341678	-0.00622821	0.00655234	-0.149938	-0.433414	-0.314516	-0.134321	-0.151723	-0.130215	-0.0880095	-0.0503674	-0.046355	-0.0475763	-0.0119135	0.0502023	0.0692388	0.081484	0.104005	0.0595914	0.0209329	-0.00192901	-0.0350533
0	0	0	0	0	0	0	0	0	0	0	0	0	0	0	0	0	0	0	0	0	0	0	0	0.019781	0.00801607	0.0138376	0.00953577	-0.00421243	-0.0063614	0.0287412	0.0199639	-0.00441931	-0.00466457	-0.012835	0.0034557	-0.0293516	-0.0352887	-0.0353963	-0.0386149	-0.0337321	-0.00560151	0.00831353	0.0186624	0.00982933	0.00325136	-0.00208302	-0.00668406	-0.00979295	-0.00693994
0	0	0	0	0	0	0	0	0	0	0	0	0	0	0	0	0	0	0	0	0	0	0	0.0308155	0.00930114	0.0143236	-0.00955935	0.00477567	0.0133506	0.00963938	0.00329801	0.000813635	-0.0178167	-0.0425407	-0.0338119	-0.0426675	-0.0470428	-0.0381356	-0.0452209	-0.0348374	-0.0384778	-0.0150762	0.00178573	0.00842736	0.00754575	-0.00511665	-0.00519702	-0.00540485	-0.00119639	0.01137
0	0	0	0	0	0	0	0	0	0	0	0	0	0	0	0	0	0	0	0	0	0	0	0.0102654	0.0116467	0.00776253	-0.00208787	0.0176576	0.00989298	-0.00850771	-0.00700671	-0.0057112	-0.0432975	-0.0416903	-0.0446397	-0.0587485	-0.06086	-0.0495718	-0.0556266	-0.0449689	-0.0361164	-0.0198142	-0.00023691	0.00780639	-0.00265313	-0.0121152	-0.00405274	0.00249184	0.00650498	0.00916776
0	0	0	0	0	0	0	0	0	0	0	0	0	0	0	0	0	0	0	0	0	0	0	0.0123328	0.0144764	0.0187026	0.013757	0.0170161	-0.00691927	-0.0171595	-0.00315018	-0.0013631	-0.0284787	-0.0312142	-0.0502316	-0.0495133	-0.0351299	-0.0566519	-0.055392	-0.0556876	-0.0401655	0.00323366	0.00440213	0.011234	0.00457654	-0.00330709	0.000796879	0.00353196	0.0130825	0.0187728
0	0	0	0	0	0	0	0	0	0	0	0	0	0	0	0	0	0	0	0	0	0	0	0.029518	0.0517298	0.0297721	0.00304975	-0.00881406	-0.0212858	-0.0340445	-0.0318534	-0.0042875	-0.0210601	-0.0416849	-0.0564781	-0.0485444	-0.0458876	-0.0564288	-0.0658479	-0.0527511	-0.031944	-0.00312624	0.00322984	0.0120966	0.0149213	-0.00663287	0.00864045	0.0204229	0.00677358	0.0200989
0	0	0	0	0	0	0	0	0	0	0	0	0	0	0	0	0	0	0	0	0	0	0	0.0293766	0.0467835	0.00548801	-0.022422	-0.0149358	-0.018128	-0.0539182	-0.0430567	-0.0441815	-0.0488675	-0.0400477	-0.0478153	-0.0508453	-0.0620715	-0.0672696	-0.0663584	-0.0449245	-0.0345415	-0.00281384	0.00344183	0.0118204	-0.000340236	0.00236546	-0.0012616	0.00315769	0.00164647	0
0	0	0	0	0	0	0	0	0	0	0	0	0	0	0	0	0	0	0	0	0	0	0	0.0552406	0.0611519	0.0123682	-0.00440229	-0.0288039	-0.0340234	-0.0445351	-0.028173	-0.0322823	-0.0284746	-0.0147606	-0.0473212	-0.0702396	-0.0632624	-0.0695985	-0.0708674	-0.0458791	-0.0105613	-0.0084947	-0.00152836	0.00810959	0.0030115	0.00672182	0.00693005	0.0110227	0.00503061	0
0	0	0	0	0	0	0	0	0	0	0	0	0	0	0	0	0	0	0	0	0	0	0	0.0635719	0.0849903	0.0219024	0.00761725	-0.00630379	-0.0540823	-0.0411837	-0.0225204	-0.0382303	-0.0665628	-0.0238714	-0.0256926	-0.0517282	-0.0634463	-0.0498663	-0.042293	-0.0253999	0.00263524	-0.00483633	0.000615328	0.0151928	0.00113699	0.00746946	0.00615313	0.0211426	0	0
0	0	0	0	0	0	0	0	0	0	0	0	0	0	0	0	0	0	0	0	0	0	0	0	0.0673765	0.023015	-0.0112618	-0.00560457	-0.0138335	-0.0186971	-0.0277052	-0.025065	-0.0466397	-0.0568692	-0.0614545	-0.0668983	-0.0694673	-0.0710433	-0.0463148	-0.0236537	-0.00191042	0.0152802	0.00207881	0.00477093	0.00715925	0.00429228	0.00136764	0.00966518	0	0
0	0	0	0	0	0	0	0	0	0	0	0	0	0	0	0	0	0	0	0	0	0	0	0	0	0.0314653	0.00501327	-0.0226832	-0.00531843	0.00513009	0.0115103	-0.0109474	-0.0391482	-0.0365657	-0.0551609	-0.0717442	-0.0526075	-0.0438128	-0.041705	-0.0125522	0.00264709	0.00188872	0.00702456	0.0150299	0.0172391	0.0184607	0.00781141	0	0	0
0	0	0	0	0	0	0	0	0	0	0	0	0	0	0	0	0	0	0	0	0	0	0	0	0	0	0	0.00087343	-0.0144584	-0.0160182	0.0271162	0.0356023	0.0117828	-0.0443334	-0.0590635	-0.0591844	-0.0622622	-0.0453674	-0.032747	-0.011692	0.0143854	0.0118703	0.0120752	0.0228307	0.00357872	0	0	0	0	0
0	0	0	0	0	0	0	0	0	0	0	0	0	0	0	0	0	0	0	0	0	0	0	0	0	0	0	0	0.00239815	-0.00552711	0.00236899	0.0357639	0.000484906	-0.00321169	-0.0432484	-0.0557004	-0.0247786	-0.00994443	-0.00610401	0.00365459	0.0268916	0.0126112	0.0109054	0.00862659	0	0	0	0	0	0
0	0	0	0	0	0	0	0	0	0	0	0	0	0	0	0	0	0	0	0	0	0	0	0	0	0	0	0	0	0.00275023	0.00531249	0.00282809	0.00435489	0.00334688	0.00604767	-0.00139062	-0.00424053	0.00513316	0.0280179	0.0199981	0.0179677	0.0152331	0.0180405	0	0	0	0	0	0	0
0	0	0	0	0	0	0	0	0	0	0	0	0	0	0	0	0	0	0	0	0	0	0	0	0	0	0	0	0	0	0.0502114	-0.0113471	-0.0104677	0.0149962	0.0212979	0.012258	0.0117149	0.0312331	0.0225844	0.0231252	0.0154126	0.019796	0	0	0	0	0	0	0	0
0	0	0	0	0	0	0	0	0	0	0	0	0	0	0	0	0	0	0	0	0	0	0	0	0	0	0	0	0	0	0	0	0	0	0	0	0	0	0	0	0	0	0	0	0	0	0	0	0	0
0	0	0	0	0	0	0	0	0	0	0	0	0	0	0	0	0	0	0	0	0	0	0	0	0	0	0	0	0	0	0	0	0	0	0	0	0	0	0	0	0	0	0	0	0	0	0	0	0	0
0	0	0	0	0	0	0	0	0	0	0	0	0	0	0	0	0	0	0	0	0	0	0	0	0	0	0	0	0	0	0	0	0	0	0	0	0	0	0	0	0	0	0	0	0	0	0	0	0	0
0	0	0	0	0	0	0	0	0	0	0	0	0	0	0	0	0	0	0	0	0	0	0	0	0	0	0	0	0	0	0	0	0	0	0	0	0	0	0	0	0	0	0	0	0	0	0	0	0	0
0	0	0	0	0	0	0	0	0	0	0	0	0	0	0	0	0	0	0	0	0	0	0	0	0	0	0	0	0	0	0	0	0	0	0	0	0	0	0	0	0	0	0	0	0	0	0	0	0	0
0	0	0	0	0	0	0	0	0	0	0	0	0	0	0	0	0	0	0	0	0	0	0	0	0	0	0	0	0	0	0	0	0	0	0	0	0	0	0	0	0	0	0	0	0	0	0	0	0	0
0	0	0	0	0	0	0	0	0	0	0	0	0	0	0	0	0	0	0	0	0	0	0	0	0	0	0	0	0	0	0	0	0	0	0	0	0	0	0	0	0	0	0	0	0	0	0	0	0	0
0	0	0	0	0	0	0	0	0	0	0	0	0	0	0	0	0	0	0	0	0	0	0	0	0	0	0	0	0	0	0	0	0	0	0	0	0	0	0	0	0	0	0	0	0	0	0	0	0	0
0	0	0	0	0	0	0	0	0	0	0	0	0	0	0	0	0	0	0	0	0	0	0	0	0	0	0	0	0	0	0	0	0	0	0	0	0	0	0	0	0	0	0	0	0	0	0	0	0	0
0	0	0	0	0	0	0	0	0	0	0	0	0	0	0	0	0	0	0	0	0	0	0	0	0	0	0	0	0	0	0	0	0	0	0	0	0	0	0	0	0	0	0	0	0	0	0	0	0	0
0	0	0	0	0	0	0	0	0	0	0	0	0	0	0	0	0	0	0	0	0	0	0	0	0	0	0	0	0	0	0	0	0	0	0	0	0	0	0	0	0	0	0	0	0	0	0	0	0	0
0	0	0	0	0	0	0	0	0	0	0	0	0	0	0	0	0	0	0	0	0	0	0	0	0	0	0	0	0	0	0	0	0	0	0	0	0	0	0	0	0	0	0	0	0	0	0	0	0	0
0	0	0	0	0	0	0	0	0	0	0	0	0	0	0	0	0	0	0	0	0	0	0	0	0	0	0	0	0	0	0	0	0	0	0	0	0	0	0	0	0	0	0	0	0	0	0	0	0	0
0	0	0	0	0	0	0	0	0	0	0	0	0	0	0	0	0	0	0	0	0	0	0	0	0	0	0	0	0	0	0	0	0	0	0	0	0	0	0	0	0	0	0	0	0	0	0	0	0	0
0	0	0	0	0	0	0	0	0	0	0	0	0	0	0	0	0	0	0	0	0	0	0	0	0	0	0	0	0	0	0	0	0	0	0	0	0	0	0	0	0	0	0	0	0	0	0	0	0	0
0	0	0	0	0	0	0	0	0	0	0	0	0	0	0	0	0	0	0	0	0	0	0	0	0	0	0	0	0	0	0	0	0	0	0	0	0	0	0	0	0	0	0	0	0	0	0	0	0	0
0	0	0	0	0	0	0	0	0	0	0	0	0	0	0	0	0	0	0	0	0	0	0	0	0	0	0	0	0	0	0	0	0	0	0	0	0	0	0	0	0	0	0	0	0	0	0	0	0	0
0	0	0	0	0	0	0	0	0	0	0	0	0	0	0	0	0	0	0	0	0	0	0	0	0	0	0	0	0	0	0	0	0	0	0	0	0	0	0	0	0	0	0	0	0	0	0	0	0	0
0	0	0	0	0	0	0	0	0	0	0	0	0	0	0	0	0	0	0	0	0	0	0	0	0	0	0	0	0	0	0	0	0	0	0	0	0	0	0	0	0	0	0	0	0	0	0	0	0	0
0	0	0	0	0	0	0	0	0	0	0	0	0	0	0	0	0	0	0	0	0	0	0	0	0	0	0	0	0	0	0	0	0	0	0	0	0	0	0	0	0	0	0	0	0	0	0	0	0	0
0	0	0	0	0	0	0	0	0	0	0	0	0	0	0	0	0	0	0	0	0	0	0	0	0	0	0	0	0	0	0	0	0	0	0	0	0	0	0	0	0	0	0	0	0	0	0	0	0	0
0	0	0	0	0	0	0	0	0	0	0	0	0	0	0	0	0	0	0	0	0	0	0	0	0	0	0	0	0	0	0	0	0	0	0	0	0	0	0	0	0	0	0	0	0	0	0	0	0	0
0	0	0	0	0	0	0	0	0	0	0	0	0	0	0	0	0	0	0	0	0	0	0	0	0	0	0	0	0	0	0	0	0	0	0	0	0	0	0	0	0	0	0	0	0	0	0	0	0	0
0	0	0	0	0	0	0	0	0	0	0	0	0	0	0	0	0	0	0	0	0	0	0	0	0	0	0	0	0	0	0	0	0	0	0	0	0	0	0	0	0	0	0	0	0	0	0	0	0	0
0	0	0	0	0	0	0	0	0	0	0	0	0	0	0	0	0	0	0	0	0	0	0	0	0	0	0	0	0	0	0	0	0	0	0	0	0	0	0	0	0	0	0	0	0	0	0	0	0	0
0	0	0	0	0	0	0	0	0	0	0	0	0	0	0	0	0	0	0	0	0	0	0	0	0	0	0	0	0	0	0	0	0	0	0	0	0	0	0	0	0	0	0	0	0	0	0	0	0	0
0	0	0	0	0	0	0	0	0	0	0	0	0	0	0	0	0	0	0	0	0	0	0	0	0	0	0	0	0	0	0	0	0	0	0	0	0	0	0	0	0	0	0	0	0	0	0	0	0	0
0	0	0	0	0	0	0	0	0	0	0	0	0	0	0	0	0	0	0	0	0	0	0	0	0	0	0	0	0	0	0	0	0	0	0	0	0	0	0	0	0	0	0	0	0	0	0	0	0	0
0	0	0	0	0	0	0	0	0	0	0	0	0	0	0	0	0	0	0	0	0	0	0	0	0	0	0	0	0	0	0	0	0	0	0	0	0	0	0	0	0	0	0	0	0	0	0	0	0	0
0	0	0	0	0	0	0	0	0	0	0	0	0	0	0	0	0	0	0	0	0	0	0	0	0	0	0	0	0	0	0	0	0	0	0	0	0	0	0	0	0	0	0	0	0	0	0	0	0	0
0	0	0	0	0	0	0	0	0	0	0	0	0	0	0	0	0	0	0	0	0	0	0	0	0	0	0	0	0.0629443	0.0619585	0.0453559	0	0	0	0	0	0	0	0	0	0	0	0	0	0	0	0	0	0	0
0	0	0	0	0	0	0	0	0	0	0	0	0	0	0	0	0	0	0	0	0	0	0	0	0.0245017	0.023239	0.0277066	0.0423806	0.0423282	0.0243356	0.049694	0.0475363	0.0342019	0	0	0.0688106	0.0767053	0.0568252	0	0	0	0	0	0	0	0	0	0	0	0
0	0	0	0	0	0	0	0	0	0	0	0	0	0	0	0	0	0	0	0	0.0144819	0.0141201	0.0174374	0.00823995	0.00564617	0.0145581	0.0107154	0.0338843	0.0312166	0.0117418	0.0338608	0.0492065	0.0325067	0.0463444	0.0516616	0.0512282	0.0493477	0.0567685	0.00204448	0	0	0	0	0	0	0	0	0	0	0
0	0	0	0	0	0	0	0	0	0	0	0	0	0	0	0	0	0	0.0195857	0.00947561	0.0107346	0.0129369	0.015845	0.0142734	0.0162649	0.00882093	0.0104379	0.0144574	0.00708709	-0.00487611	0.00593991	0.0152	-0.0032889	-0.00072202	0.0234602	0.00303438	0.0268032	0.0584328	0.0294833	0	0	0	0	0	0	0	0	0	0	0
0	0	0	0	0	0	0	0	0	0	0	0	0	0	0	0	0.022409	0.0253714	0.0199678	0.0154897	0.0253721	0.0112695	-0.00250414	-0.0285371	-0.0537858	-0.0483128	-0.0276543	0.00865542	0.0151523	-0.056658	-0.0903751	0.0165929	0.0647132	-0.0180039	0.0437347	0.058204	0.0211354	0.00455065	0.060988	0	0	0	0	0	0	0	0	0	0	0
0	0	0	0	0	0	0	0	0	0	0	0	0	0	0	0.0405841	0.025585	0.022	0.0199588	0.0150102	0.0205923	0.0126378	0.0170007	0.0114184	0.00304343	-0.000579075	-0.0239287	-0.0287165	-0.0221032	-0.0369853	-0.0441495	-0.049738	-0.0254618	0.0336414	0.0212757	0.0247332	0.0502407	-0.0102345	0	0	0	0	0	0	0	0	0	0	0	0
0	0	0	0	0	0	0	0	0	0	0	0	0	0	0.0302824	0.0258745	0.0203473	0.0259537	0.0422171	0.0441193	0.0411991	0.0437769	0.0362938	-0.00876457	0.00145126	0.00226871	-0.0307839	-0.0213612	-0.0433222	-0.0357737	-0.0346299	-0.0184158	0.0272402	0.0284246	-0.00994643	0.0098452	0.0190516	0.00848692	-0.0574821	0	0	0	0	0	0	0	0	0	0	0
0	0	0	0	0	0	0	0	0	0	0	0	0	0.0306308	0.0230976	0.0269087	0.0212451	0.0279997	0.0380691	0.0633207	0.0770693	0.0484164	0.00530884	-0.00992681	-0.0207922	-0.0156957	-0.0457221	-0.0250693	-0.0503645	-0.0471438	-0.0234992	0.0146028	0.045397	-0.0069419	0.0249546	0.00169184	-4.78341e-05	0.00661582	-0.0432319	0	0	0	0	0	0	0	0	0	0	0
0	0	0	0	0	0	0	0	0	0	0	0	0	0.0255661	0.0283196	0.0323521	0.0143669	0.02344	0.022536	0.0295709	0.0126352	0.00879488	-0.0157226	-0.00626678	-0.0268137	-0.0524132	-0.065116	-0.0307227	-0.0405104	-0.0388434	-0.0260998	0.0155254	-0.0199839	0.0328801	0.0363141	-0.00579783	0.000545896	0.00848323	-0.0478476	0	0	0	0	0	0	0	0	0	0	0
0	0	0	0	0	0	0	0	0	0	0	0	0	0.0235893	0.0213408	0.0313178	0.0162618	0.0258035	0.0122007	0.00492957	-0.00270648	0.0116451	-0.00148674	-0.0145795	-0.0473333	-0.0465553	-0.0544503	-0.0257376	-0.00853387	-0.0181041	-0.0403551	-0.02156	0.00267396	0.0359471	-0.0145084	-0.0142188	-0.00850577	-0.00921938	0	0	0	0	0	0	0	0	0	0	0	0
0	0	0	0	0	0	0	0	0	0	0	0	0	0.0288294	0.0271783	0.0388504	0.0211636	0.0190485	0.0111894	0.0210593	0.0172723	0.00150847	-0.0132381	-0.0360425	-0.0556505	-0.0453593	-0.027621	-0.010029	0.00158493	-0.00329548	-0.0549896	-0.00193258	0.0224529	-0.00994746	-0.0341931	-0.0206797	-0.0152052	-0.0308707	0	0	0	0	0	0	0	0	0	0	0	0
0	0	0	0	0	0	0	0	0	0	0	0	0	0.025973	0.0330258	0.0360277	0.0298618	0.0143702	0.00675699	0.0128406	0.0144772	-0.00287168	-0.0106137	-0.0138875	-0.0217797	0.00243618	-0.00452368	-0.0158835	-0.00629212	-0.0360798	-0.01472	0.0174675	-0.0163805	-0.00969538	-0.0245086	-0.0149006	-0.0092902	-0.0415957	0	0	0	0	0	0	0	0	0	0	0	0
0	0	0	0	0	0	0	0	0	0	0	0	0	0.0215298	0.0263211	0.0341289	0.0230324	0.0288763	0.0354569	0.0379362	0.0225692	0.010876	-0.00555452	0.0249226	0.0786993	0.107508	0.0929859	0.0695136	0.0463297	0.0311425	0.0638657	0.122732	0.0561176	0.0363601	0.041422	-0.0063059	0	0	0	0	0	0	0	0	0	0	0	0	0	0
0	0	0	0	0	0	0	0	0	0	0	0	0	0	0.0476147	0.0459215	0.0314635	0.0470342	0.0406807	0.0149944	0.00798667	-0.00401437	-0.00242132	-0.00726391	-0.015598	-0.0252967	-0.0171851	-0.0153942	-0.0250501	-0.0341714	-0.0188931	-0.009141	-0.0239227	0.00209468	-0.0211985	0	0	0	0	0	0	0	0	0	0	0	0	0	0	0
0	0	0	0	0	0	0	0	0	0	0	0	0	0	0.0528375	0.0409929	0.0306348	0.0255247	0.0281182	0.0241111	0.0202642	0.00787626	-0.00494899	0.00539428	0.0012242	-0.0123798	-0.0115614	-0.0226504	-0.019692	-0.0297426	-0.00971148	-0.00412329	-0.00990019	0	0	0	0	0	0	0	0	0	0	0	0	0	0	0	0	0
0	0	0	0	0	0	0	0	0	0	0	0	0	0	0	0.040104	0.0331905	0.035965	0.0226353	0.0232267	0.0134475	0.00249817	-0.000432594	-0.00154759	-0.000716411	-0.00751488	-0.00924165	0.00506265	0.00159925	-0.00509753	0	0	0	0	0	0	0	0	0	0	0	0	0	0	0	0	0	0	0	0
0	0	0	0	0	0	0	0	0	0	0	0	0	0	0	0	0.0268203	0.0216241	0.0278122	0.0226228	0.0161912	0.00781004	0.0136648	0.0165578	0.00658181	0.00159051	0.0025536	0.0159129	0	0	0	0	0	0	0	0	0	0	0	0	0	0	0	0	0	0	0	0	0	0
0	0	0	0	0	0	0	0	0	0	0	0	0	0	0	0	0	0.0302577	0.0170636	0.0273225	0.0171941	0.0195502	0.02229	0.0199249	0.00200726	0.0176131	0.0206479	0	0	0	0	0	0	0	0	0	0	0	0	0	0	0	0	0	0	0	0	0	0	0
0	0	0	0	0	0	0	0	0	0	0	0	0	0	0	0	0	0	0.0296742	0.0203836	0.0263722	0.0148799	0.0238706	0.0230366	0.019074	0	0	0	0	0	0	0	0	0	0	0	0	0	0	0	0	0	0	0	0	0	0	0	0	0
0	0	0	0	0	0	0	0	0	0	0	0	0	0	0	0	0	0	0	0	0	0	0	0	0	0	0	0	0	0	0	0	0	0	0	0	0	0	0	0	0	0	0	0	0	0	0	0	0	0
0	0	0	0	0	0	0	0	0	0	0	0	0	0	0	0	0	0	0	0	0	0	0	0	0	0	0	0	0	0	0	0	0	0	0	0	0	0	0	0	0	0	0	0	0	0	0	0	0	0
0	0	0	0	0	0	0	0	0	0	0	0	0	0	0	0	0	0	0	0	0	0	0	0	0	0	0	0	0	0	0	0	0	0	0	0	0	0	0	0	0	0	0	0	0	0	0	0	0	0
0	0	0	0	0	0	0	0	0	0	0	0	0	0	0	0	0	0	0	0	0	0	0	0	0	0	0	0	0	0	0	0	0	0	0	0	0	0	0	0	0	0	0	0	0	0	0	0	0	0
0	0	0	0	0	0	0	0	0	0	0	0	0	0	0	0	0	0	0	0	0	0	0	0	0	0	0	0	0	0	0	0	0	0	0	0	0	0	0	0	0	0	0	0	0	0	0	0	0	0
0	0	0	0	0	0	0	0	0	0	0	0	0	0	0	0	0	0	0	0	0	0	0	0	0	0	0	0	0	0	0	0	0	0	0	0	0	0	0	0	0	0	0	0	0	0	0	0	0	0
0	0	0	0	0	0	0	0	0	0	0	0	0	0	0	0	0	0	0	0	0	0	0	0	0	0	0	0	0	0	0	0	0	0	0	0	0	0	0	0	0	0	0	0	0	0	0	0	0	0
0	0	0	0	0	0	0	0	0	0	0	0	0	0	0	0	0	0	0	0	0	0	0	0	0	0	0	0	0	0	0	0	0	0	0	0	0	0	0	0	0	0	0	0	0	0	0	0	0	0
0	0	0	0	0	0	0	0	0	0	0	0	0	0	0	0	0	0	0	0	0	0	0	0	0	0	0	0	0	0	0	0	0	0	0	0	0	0	0	0	0	0	0	0	0	0	0	0	0	0
0	0	0	0	0	0	0	0	0	0	0	0	0	0	0	0	0	0	0	0	0	0	0	0	0	0	0	0	0	0	0	0	0	0	0	0	0	0	0	0	0	0	0	0	0	0	0	0	0	0
0	0	0	0	0	0	0	0	0	0	0	0	0	0	0	0	0	0	0	0	0	0	0	0	0	0	0	0	0	0	0	0	0	0	0	0	0	0	0	0	0	0	0	0	0	0	0	0	0	0
0	0	0	0	0	0	0	0	0	0	0	0	0	0	0	0	0	0	0	0	0	0	0	0	0	0	0	0	0	0	0	0	0	0	0	0	0	0	0	0	0	0	0	0	0	0	0	0	0	0
0	0	0	0	0	0	0	0	0	0	0	0	0	0	0	0	0	0	0	0	0	0	0	0	0	0	0	0	0	0	0	0	0	0	0	0	0	0	0	0	0	0	0	0	0	0	0	0	0	0
0	0	0	0	0	0	0	0	0	0	0	0	0	0	0	0	0	0	0	0	0	0	0	0	0	0	0	0	0	0	0	0	0	0	0	0	0	0	0	0	0	0	0	0	0	0	0	0	0	0
0	0	0	0	0	0	0	0	0	0	0	0	0	0	0	0	0	0	0	0	0	0	0	0	0	0	0	0	0	0	0	0	0	0	0	0	0	0	0	0	0	0	0	0	0	0	0	0	0	0
0	0	0	0	0	0	0	0	0	0	0	0	0	0	0	0	0	0	0	0	0	0	0	0	0	0	0	0	0	0	0	0	0	0	0	0	0	0	0	0	0	0	0	0	0	0	0	0	0	0
0	0	0	0	0	0	0	0	0	0	0	0	0	0	0	0	0	0	0	0	0	0	0	0	0	0	0	0	0	0	0	0	0	0	0	0	0	0	0	0	0	0	0	0	0	0	0	0	0	0
0	0	0	0	0	0	0	0	0	0	0	0	0	0	0	0	0	0	0	0	0	0	0	0	0	0	0	0	0	0	0	0	0	0	0	0	0	0	0	0	0	0	0	0	0	0	0	0	0	0
0	0	0	0	0	0	0	0	0	0	0	0	0	0	0	0	0	0	0	0	0	0	0	0	0	0	0	0	0	0	0	0	0	0	0	0	0	0	0	0	0	0	0	0	0	0	0	0	0	0
0	0	0	0	0	0	0	0	0	0	0	0	0	0	0	0	0	0	0	0	0	0	0	0	0	0	0	0	0	0	0	0	0	0	0	0	0	0	0	0	0	0	0	0	0	0	0	0	0	0
0	0	0	0	0	0	0	0	0	0	0	0	0	0	0	0	0	0	0	0	0	0	0	0	0	0	0	0	0	0	0	0	0	0	0	0	0	0	0	0	0	0	0	0	0	0	0	0	0	0
0	0	0	0	0	0	0	0	0	0	0	0	0	0	0	0	0	0	0	0	0	0	0	0	0	0	0	0	0	0	0	0	0	0	0	0	0	0	0	0	0	0	0	0	0	0	0	0	0	0
0	0	0	0	0	0	0	0	0	0	0	0	0	0	0	0	0	0	0	0	0	0	0	0	0	0	0	0	0	0	0	0	0	0	0	0	0	0	0	0	0	0	0	0	0	0	0	0	0	0
0	0	0	0	0	0	0	0	0	0	0	0	0	0	0	0	0	0	0	0	0	0	0	0	0	0	0	0	0	0	0	0	0	0	0	0	0	0	0	0	0	0	0	0	0	0	0	0	0	0
0	0	0	0	0	0	0	0	0	0	0	0	0	0	0	0	0	0	0	0	0	0	0	0	0	0	0	0	0	0	0	0	0	0	0	0	0	0	0	0	0	0	0	0	0	0	0	0	0	0
0	0	0	0	0	0	0	0	0	0	0	0	0	0	0	0	0	0	0	0	0	0	0	0	0	0	0	0	0	0	0	0	0	0	0	0	0	0	0	0	0	0	0	0	0	0	0	0	0	0
0	0	0	0	0	0	0	0	0	0	0	0	0	0	0	0	0	0	0	0	0	0	0	0	0	0	0	0	0	0	0	0	0	0	0	0	0	0	0	0	0	0	0	0	0	0	0	0	0	0
0	0	0	0	0	0	0	0	0	0	0	0	0	0	0	0	0	0	0	0	0	0	0	0	0	0	0	0	0	0	0	0	0	0	0	0	0	0	0	0	0	0	0	0	0	0	0	0	0	0
0	0	0	0	0	0	0	0	0	0	0	0	0	0	0	0	0	0	0	0	0	0	0	0	0	0	0	0	0	0	0	0	0.0233129	0.0288199	0.0227718	0.0259714	0.030164	0.0283102	0.0249952	0.0170021	0	0	0	0	0	0	0	0	0	0
0	0	0	0	0	0	0	0	0	0	0	0	0	0	0	0	0	0	0	0	0	0	0	0	0	0	0	0	0	0	0.0503431	0.0505157	0.0321174	0.0392971	0.0237608	0.0391189	0.0382643	0.0303632	0.0248265	0.0157374	0.0176911	0	0	0	0	0	0	0	0	0
0	0	0	0	0	0	0	0	0	0	0	0	0	0	0	0	0	0	0	0	0	0	0	0	0	0	0	0	0	0.0339473	0.0506824	0.0422941	0.0220438	0.0436093	0.0266992	0.0409235	0.0329715	0.0265315	0.0276518	0.028615	0.0168051	0.00546706	0.011773	0	0	0	0	0	0	0
0	0	0	0	0	0	0	0	0	0	0	0	0	0	0	0	0	0	0	0	0	0	0	0	0	0	0	0	0.0532609	0.0266824	0.0401108	0.0356408	0.0222727	0.0298339	0.056161	0.0557658	0.0298748	0.0231479	0.024871	0.0217479	0.0315679	0.02592	0.00658131	0.00373503	0	0	0	0	0	0
0	0	0	0	0	0	0	0	0	0	0	0	0	0	0	0	0	0	0	0	0	0	0	0	0	0	0	0	0.0401876	0.0263845	0.0321548	0.0407691	0.0186471	0.0395801	0.0653566	0.0445673	0.0236486	0.0285456	0.0309122	0.0177767	0.0209898	0.0281162	0.0147527	0.000789126	0.000699231	0	0	0	0	0
0	0	0	0	0	0	0	0	0	0	0	0	0	0	0	0	0	0	0	0	0	0	0	0	0	0	0	0	0.0212153	0.0200707	0.0284818	0.0288922	0.0166032	0.046701	0.0451067	0.0638055	0.0525033	0.0452855	0.0379446	0.0176124	0.0247516	0.0317691	0.0271161	0.0200079	-0.0363616	-0.0763491	0	0	0	0
0	0	0	0	0	0	0	0	0	0	0	0	0	0	0	0	0	0	0	0	0	0	0	0	0	0	0	0.0305388	0.0373895	0.0319675	0.0419952	0.0349886	0.0253708	0.0351091	0.0407103	0.0324448	0.0327567	0.0244285	0.0294796	0.0311183	0.0266277	0.0243785	0.0142544	0.0265843	0.0105237	0.00267962	-0.00205224	0	0	0
0	0	0	0	0	0	0	0	0	0	0	0	0	0	0	0	0	0	0	0	0	0	0	0	0	0	0	0.0207884	0.0410081	0.0243555	0.0380125	0.056635	0.0495799	0.0489378	0.0647006	0.0531509	0.0519113	0.0668488	0.0383917	0.0353684	0.0322364	0.019862	0.0240293	0.0177452	0.0143093	0.01423	0.00843407	-0.00702882	0	0
0	0	0	0	0	0	0	0	0	0	0	0	0	0	0	0	0	0	0	0	0	0	0	0	0	0	0	0	0.0450176	0.0298898	0.0337236	0.0616159	0.049373	0.069743	0.0711376	0.0624941	0.0590327	0.0490863	0.0490566	0.0371	0.0365648	0.0322121	0.0148333	0.0183602	0.00376858	0.0157975	0.00477274	8.99975e-05	0	0
0	0	0	0	0	0	0	0	0	0	0	0	0	0	0	0	0	0	0	0	0	0	0	0	0	0	0	0	0.0375778	0.0259242	0.0557358	0.0584398	0.0550642	0.0618715	0.0465586	0.0647626	0.0803904	0.0521884	0.0463007	0.0354313	0.0324011	0.0152746	0.0213748	0.0151302	0.0118713	0.0147177	0.0101428	0.00434158	0	0
0	0	0	0	0	0	0	0	0	0	0	0	0	0	0	0	0	0	0	0	0	0	0	0	0	0	0	0	0.041697	0.0235458	0.0517602	0.0668112	0.0585084	0.0621695	0.0573205	0.0350736	0.0495662	0.0378907	0.0399942	0.0459737	0.0306054	0.0199825	0.0157828	0.0152437	0.0199546	0.0141594	0.0173788	0.0150654	0	0
0	0	0	0	0	0	0	0	0	0	0	0	0	0	0	0	0	0	0	0	0	0	0	0	0	0	0	0	0.043237	0.0202505	0.0438244	0.0646069	0.0459312	0.056401	0.0495049	0.0436813	0.0335875	0.0408395	0.050573	0.0527715	0.0383193	0.0332671	0.0282622	0.0132658	0.00935097	0.00670102	0.00262633	0	0	0
0	0	0	0	0	0	0	0	0	0	0	0	0	0	0	0	0	0	0	0	0	0	0	0	0	0	0	0	0.0402073	0.0265061	0.0429645	0.0473255	0.0494502	0.059178	0.0535338	0.0365518	0.0496648	0.0392681	0.0370038	0.0296555	0.030192	0.0302754	0.0271512	0.0169691	0.0114468	0.0158874	0.00320699	0	0	0
0	0	0	0	0	0	0	0	0	0	0	0	0	0	0	0	0	0	0	0	0	0	0	0	0	0	0	0.0411294	0.0364022	0.0274829	0.0473583	0.0474606	0.0347112	0.0411752	0.0492154	0.0400462	0.0361872	0.0366153	0.0147693	0.0230965	0.0171483	0.00829075	0.0102559	0.01985	0.00209848	0	0	0	0	0
0	0	0	0	0	0	0	0	0	0	0	0	0	0	0	0	0	0	0	0	0	0	0	0	0	0	0	0.0599462	0.0340588	0.00930322	0.0433181	0.0524974	0.0365763	0.06843	0.0405327	0.0332507	0.0624497	0.0829396	0.0914212	0.0907561	0.0826821	0.100872	0	0	0	0	0	0	0	0
0	0	0	0	0	0	0	0	0	0	0	0	0	0	0	0	0	0	0	0	0	0	0	0	0	0	0	0	0	0.0230831	0.0421379	0.0487962	0.0326316	0	0.0233201	-0.00857354	0	0	0	0	0	0	0	0	0	0	0	0	0	0
0	0	0	0	0	0	0	0	0	0	0	0	0	0	0	0	0	0	0	0	0	0	0	0	0	0	0	0	0	0	0	0	0	0	0	0	0	0	0	0	0	0	0	0	0	0	0	0	0	0
0	0	0	0	0	0	0	0	0	0	0	0	0	0	0	0	0	0	0	0	0	0	0	0	0	0	0	0	0	0	0	0	0	0	0	0	0	0	0	0	0	0	0	0	0	0	0	0	0	0
0	0	0	0	0	0	0	0	0	0	0	0	0	0	0	0	0	0	0	0	0	0	0	0	0	0	0	0	0	0	0	0	0	0	0	0	0	0	0	0	0	0	0	0	0	0	0	0	0	0
0	0	0	0	0	0	0	0	0	0	0	0	0	0	0	0	0	0	0	0	0	0	0	0	0	0	0	0	0	0	0	0	0	0	0	0	0	0	0	0	0	0	0	0	0	0	0	0	0	0
0	0	0	0	0	0	0	0	0	0	0	0	0	0	0	0	0	0	0	0	0	0	0	0	0	0	0	0	0	0	0	0	0	0	0	0	0	0	0	0	0	0	0	0	0	0	0	0	0	0
0	0	0	0	0	0	0	0	0	0	0	0	0	0	0	0	0	0	0	0	0	0	0	0	0	0	0	0	0	0	0	0	0	0	0	0	0	0	0	0	0	0	0	0	0	0	0	0	0	0
0	0	0	0	0	0	0	0	0	0	0	0	0	0	0	0	0	0	0	0	0	0	0	0	0	0	0	0	0	0	0	0	0	0	0	0	0	0	0	0	0	0	0	0	0	0	0	0	0	0
0	0	0	0	0	0	0	0	0	0	0	0	0	0	0	0	0	0	0	0	0	0	0	0	0	0	0	0	0	0	0	0	0	0	0	0	0	0	0	0	0	0	0	0	0	0	0	0	0	0
0	0	0	0	0	0	0	0	0	0	0	0	0	0	0	0	0	0	0	0	0	0	0	0	0	0	0	0	0	0	0	0	0	0	0	0	0	0	0	0	0	0	0	0	0	0	0	0	0	0
0	0	0	0	0	0	0	0	0	0	0	0	0	0	0	0	0	0	0	0	0	0	0	0	0	0	0	0	0	0	0	0	0	0	0	0	0	0	0	0	0	0	0	0	0	0	0	0	0	0
0	0	0	0	0	0	0	0	0	0	0	0	0	0	0	0	0	0	0	0	0	0	0	0	0	0	0	0	0	0	0	0	0	0	0	0	0	0	0	0	0	0	0	0	0	0	0	0	0	0
0	0	0	0	0	0	0	0	0	0	0	0	0	0	0	0	0	0	0	0	0	0	0	0	0	0	0	0	0	0	0	0	0	0	0	0	0	0	0	0	0	0	0	0	0	0	0	0	0	0
0	0	0	0	0	0	0	0	0	0	0	0	0	0	0	0	0	0	0	0	0	0	0	0	0	0	0	0	0	0	0	0	0	0	0	0	0	0	0	0	0	0	0	0	0	0	0	0	0	0
0	0	0	0	0	0	0	0	0	0	0	0	0	0	0	0	0	0	0	0	0	0	0	0	0	0	0	0	0	0	0	0	0	0	0	0	0	0	0	0	0	0	0	0	0	0	0	0	0	0
0	0	0	0	0	0	0	0	0	0	0	0	0	0	0	0	0	0	0	0	0	0	0	0	0	0	0	0	0	0	0	0	0	0	0	0	0	0	0	0	0	0	0	0	0	0	0	0	0	0
0	0	0	0	0	0	0	0	0	0	0	0	0	0	0	0	0	0	0	0	0	0	0	0	0	0	0	0	0	0	0	0	0	0	0	0	0	0	0	0	0	0	0	0	0	0	0	0	0	0
0	0	0	0	0	0	0	0	0	0	0	0	0	0	0	0	0	0	0	0	0	0	0	0	0	0	0	0	0	0	0	0	0	0	0	0	0	0	0	0	0	0	0	0	0	0	0	0	0	0
0	0	0	0	0	0	0	0	0	0	0	0	0	0	0	0	0	0	0	0	0	0	0	0	0	0	0	0	0	0	0	0	0	0	0	0	0	0	0	0	0	0	0	0	0	0	0	0	0	0
0	0	0	0	0	0	0	0	0	0	0	0	0	0	0	0	0	0	0	0	0	0	0	0	0	0	0	0	0	0	0	0	0	0	0	0	0	0	0	0	0	0	0	0	0	0	0	0	0	0
0	0	0	0	0	0	0	0	0	0	0	0	0	0	0	0	0	0	0	0	0	0	0	0	0	0	0	0	0	0	0	0	0	0	0	0	0	0	0	0	0	0	0	0	0	0	0	0	0	0
0	0	0	0	0	0	0	0	0	0	0	0	0	0	0	0	0	0	0	0	0	0	0	0	0	0	0	0	0	0	0	0	0	0	0	0	0	0	0	0	0	0	0	0	0	0	0	0	0	0
0	0	0	0	0	0	0	0	0	0	0	0	0	0	0	0	0	0	0	0	0	0	0	0	0	0	0	0	0	0	0	0	0	0	0	0	0	0	0	0	0	0	0	0	0	0	0	0	0	0
0	0	0	0	0	0	0	0	0	0	0	0	0	0	0	0	0	0	0	0	0	0	0	0	0	0	0	0	0	0	0	0	0	0	0	0	0	0	0	0	0	0	0	0	0	0	0	0	0	0
0	0	0	0	0	0	0	0	0	0	0	0	0	0	0	0	0	0	0	0	0	0	0	0	0	0	0	0	0	0	0	0	0	0	0	0	0	0	0	0	0	0	0	0	0	0	0	0	0	0
0	0	0	0	0	0	0	0	0	0	0	0	0	0	0	0	0	0	0	0	0	0	0	0	0	0	0	0	0	0	0	0	0	0	0	0	0	0	0	0	0	0	0	0	0	0	0	0	0	0
0	0	0	0	0	0	0	0	0	0	0	0	0	0	0	0	0	0	0	0	0	0	0	0	0	0	0	0	0	0	0	0	0	0	0	0	0	0	0	0	0	0	0	0	0	0	0	0	0	0
0	0	0	0	0	0	0	0	0	0	0	0	0	0	0	0	0	0	0	0	0	0	0	0	0	0	0	0	0	0	0	0	0	0	0	0	0	0	0	0	0	0	0	0	0	0	0	0	0	0
0	0	0	0	0	0	0	0	0	0	0	0	0	0	0	0	0	0	0	0	0	0	0	0	0	0	0	0	0	0	0	0	0	0	0	0	0	0	0	0	0	0	0	0	0	0	0	0	0	0
0	0	0	0	0	0	0	0	0	0	0	0	0	0	0	0	0	0	0	0	0	0	0	0	0	0	0	0	0	0	0	0	0	0	0	0	0	0	0	0	0	0	0	0	0	0	0	0	0	0
0	0	0	0	0	0	0	0	0	0	0	0	0	0	0	0	0	0	0	0	0	0	0	0	0	0	0	0	0	0.0217553	0.0265904	0.0280832	0.0218231	0.0342322	0.0190902	0.0142553	-0.000313385	0	0	0	0	0	0	0	0	0	0	0	0	0
0	0	0	0	0	0	0	0	0	0	0	0	0	0	0	0	0	0	0	0	0	0	0	0	0	0.0223838	0.0114001	0.0127576	0.0189857	0.0067235	0.0145804	0.0253274	-0.00657027	0.0100922	0.0164402	0.015596	0.0117758	0.00410186	-0.0128683	-0.0117013	0	0	0	0	0	0	0	0	0	0
0	0	0	0	0	0	0	0	0	0	0	0	0	0	0	0	0	0	0	0	0	0	0	0	0.0221073	0.0196044	0.0135561	0.00325354	0.0148527	0.0157738	0.0229055	0.0203604	0.00234498	0.0204674	0.0244189	0.0200531	0.0118824	0.0079873	0.00439606	0.00498578	0.00209273	-0.0136446	0	0	0	0	0	0	0	0
0	0	0	0	0	0	0	0	0	0	0	0	0	0	0	0	0	0	0	0	0	0	0	0.0123998	0.00752776	0.00509447	0.00492039	-0.00730793	-0.0747131	-0.0589565	-0.0156352	-0.0131822	-0.0276948	0.0342681	0.0856889	0.162424	0.1844	0.052425	0.0112179	0.054529	0.0335144	0.0164778	0.013052	0.00931471	0	0	0	0	0	0
0	0	0	0	0	0	0	0	0	0	0	0	0	0	0	0	0	0	0	0	0	0	0.0402946	0.0112222	0.0100034	0.00732708	0.0218616	0.0464252	-0.003052	-0.0116276	-0.0090753	-0.0159139	-0.0126158	0.00442609	0.0121091	0.0236153	0.0286403	0.0245615	0.0100856	-0.00730574	0.00262654	0.00366693	0.00954063	0.0353663	0	0	0	0	0	0
0	0	0	0	0	0	0	0	0	0	0	0	0	0	0	0	0	0	0	0	0	0	0.0342907	0.0232551	0.0161288	0.0316942	0.0245374	0.00654589	0.00868374	-0.0234297	-0.0265903	-0.0224782	-0.0331568	-0.00884436	0.0216185	0.0193456	0.0254812	0.00809361	0.0036512	-0.00256463	0.0183211	0.0269691	0.0133741	0.0235919	0	0	0	0	0	0
0	0	0	0	0	0	0	0	0	0	0	0	0	0	0	0	0	0	0	0	0	0.0263257	0.0199011	0.017794	0.00804017	0.0510995	0.0142706	-0.00264475	-0.00117429	-0.0233227	-0.0274697	-0.0171585	-0.0305561	-0.0128734	0.0109726	0.0188224	0.0138562	0.0139057	0.0147411	0.015329	0.016428	0.0223873	0.0127148	0.0279572	0	0	0	0	0	0
0	0	0	0	0	0	0	0	0	0	0	0	0	0	0	0	0	0	0	0	0	0	0.00949581	0.0259214	0.0538741	0.0333374	0.0069776	-0.000202798	-0.017751	-0.0299974	-0.0353335	-0.0240168	-0.0376294	-0.0198649	0.00139183	0.00851267	0.0024325	0.00573278	0.014194	0.0193757	0.0164272	0.00997729	0.0129009	0.0267237	0.0137208	0	0	0	0	0
0	0	0	0	0	0	0	0	0	0	0	0	0	0	0	0	0	0	0	0	0	0	0.0164765	0.0382006	0.0708553	0.0639168	0.0220053	0.0160823	0.00548419	-0.0222417	-0.0471033	-0.0422391	-0.0425463	-0.0268546	-0.0256023	-0.00139688	0.0204786	0.0137503	0.0215823	0.0123131	0.0238917	0.0121304	0.00946454	0.0218564	0.0168011	0	0	0	0	0
0	0	0	0	0	0	0	0	0	0	0	0	0	0	0	0	0	0	0	0	0	0	0.0247369	0.0505394	0.0470989	0.050263	0.0206515	0.00448696	-0.00883779	-0.0271403	-0.051484	-0.0372354	-0.0378136	-0.0317566	-0.0384276	-0.00842289	0.0120592	0.0148364	0.0157503	0.0144984	0.0215554	0.0328623	0.0192379	0.0312461	0.0140802	0	0	0	0	0
0	0	0	0	0	0	0	0	0	0	0	0	0	0	0	0	0	0	0	0	0	0	0.0518501	0.0500136	0.0212169	0.00125345	-0.0238128	-0.0133589	0.00416928	-0.0181689	-0.0305854	-0.0387186	-0.0582008	-0.0448156	-0.0394951	-0.0306905	0.00737837	0.00772351	0.0118591	0.01165	0.0139029	0.0208463	0.0262461	0.0171262	0.0159432	0	0	0	0	0
0	0	0	0	0	0	0	0	0	0	0	0	0	0	0	0	0	0	0	0	0	0	0	0.0179877	0.00144652	-0.00523252	-0.0350438	-0.0422898	0.00375502	0.0177785	-0.0200547	-0.029839	-0.0334676	-0.0373642	-0.0368368	-0.0366724	-0.0367537	-0.034242	-0.00797296	4.97242e-05	0.0149624	0.0256481	0.0359261	0.0259733	0.0234365	0	0	0	0	0
0	0	0	0	0	0	0	0	0	0	0	0	0	0	0	0	0	0	0	0	0	0	0	0.0126327	-0.0220072	-0.0317945	-0.029442	-0.0239742	-0.043682	-0.0536422	-0.043984	-0.0389155	-0.0443247	-0.0406686	-0.0460037	-0.0188421	0.00272561	0.0112574	0.00220852	0.0155702	0.0106816	0.027825	0.0200496	0.0261642	0	0	0	0	0	0
0	0	0	0	0	0	0	0	0	0	0	0	0	0	0	0	0	0	0	0	0	0	0	0.0125283	-0.0135214	-0.0236991	-0.0303015	-0.0276922	-0.0338625	-0.0340353	-0.0495411	-0.0309772	-0.0543315	-0.0432793	-0.0334158	-0.023489	0.00760017	0.0106821	0.00929623	0.00856401	0.0238174	0.0185162	0.0278858	0.0338369	0	0	0	0	0	0
0	0	0	0	0	0	0	0	0	0	0	0	0	0	0	0	0	0	0	0	0	0	0	0.0156844	-0.0312589	-0.0212072	-0.0247633	-0.0234072	-0.0236651	-0.0381492	-0.0405197	-0.0440299	-0.0482085	-0.0366417	-0.036406	-0.0238936	0.00902268	0.00451063	0.00529614	0.0203805	0.0203768	0.0299309	0.0246521	0	0	0	0	0	0	0
0	0	0	0	0	0	0	0	0	0	0	0	0	0	0	0	0	0	0	0	0	0	0	0.0171581	-0.00598055	-0.0159984	-0.0126112	-0.00538471	-0.0122049	-0.0351748	-0.0298411	-0.0423445	-0.0617846	-0.0379107	-0.039271	-0.00346338	0.0169414	0.00212051	0.00836712	0.0190403	0.0193167	0.0248731	0.0210436	0	0	0	0	0	0	0
0	0	0	0	0	0	0	0	0	0	0	0	0	0	0	0	0	0	0	0	0	0	0	0.0279562	0.0132896	-0.00484886	-0.00979447	0.00871944	0.00119838	-0.0393588	-0.039862	-0.0450922	-0.0475154	-0.0301024	-0.0260181	0.0013757	0.0139036	-0.00701771	0.00149667	0.0168917	0.0164649	0.00897123	0	0	0	0	0	0	0	0
0	0	0	0	0	0	0	0	0	0	0	0	0	0	0	0	0	0	0	0	0	0	0	0	0.0656591	0.0380641	0.0249272	0.0215255	0.0342847	0.00418536	-0.0381718	-0.0227118	-0.0369371	-0.0110522	-0.00203357	0.0101628	0.00892724	0.0025623	0.00417905	0.00450633	0.00382829	0	0	0	0	0	0	0	0	0
0	0	0	0	0	0	0	0	0	0	0	0	0	0	0	0	0	0	0	0	0	0	0	0	0	0.0373173	0.015842	0.0323815	0.0147369	0.0204579	0.000945109	0.0166346	-0.0200533	0.00119596	0.0161969	0.0298742	-0.0075378	0.012658	0.0136643	0.00615628	0	0	0	0	0	0	0	0	0	0
0	0	0	0	0	0	0	0	0	0	0	0	0	0	0	0	0	0	0	0	0	0	0	0	0	0	0	0	0	0.00259388	-0.00247982	0.0385797	0.0082509	0.0286328	0.0544932	0.0302782	0	0	0	0	0	0	0	0	0	0	0	0	0	0
0	0	0	0	0	0	0	0	0	0	0	0	0	0	0	0	0	0	0	0	0	0	0	0	0	0	0	0	0	0	0	0	0	0	0	0	0	0	0	0	0	0	0	0	0	0	0	0	0	0
0	0	0	0	0	0	0	0	0	0	0	0	0	0	0	0	0	0	0	0	0	0	0	0	0	0	0	0	0	0	0	0	0	0	0	0	0	0	0	0	0	0	0	0	0	0	0	0	0	0
0	0	0	0	0	0	0	0	0	0	0	0	0	0	0	0	0	0	0	0	0	0	0	0	0	0	0	0	0	0	0	0	0	0	0	0	0	0	0	0	0	0	0	0	0	0	0	0	0	0
0	0	0	0	0	0	0	0	0	0	0	0	0	0	0	0	0	0	0	0	0	0	0	0	0	0	0	0	0	0	0	0	0	0	0	0	0	0	0	0	0	0	0	0	0	0	0	0	0	0
0	0	0	0	0	0	0	0	0	0	0	0	0	0	0	0	0	0	0	0	0	0	0	0	0	0	0	0	0	0	0	0	0	0	0	0	0	0	0	0	0	0	0	0	0	0	0	0	0	0
0	0	0	0	0	0	0	0	0	0	0	0	0	0	0	0	0	0	0	0	0	0	0	0	0	0	0	0	0	0	0	0	0	0	0	0	0	0	0	0	0	0	0	0	0	0	0	0	0	0
0	0	0	0	0	0	0	0	0	0	0	0	0	0	0	0	0	0	0	0	0	0	0	0	0	0	0	0	0	0	0	0	0	0	0	0	0	0	0	0	0	0	0	0	0	0	0	0	0	0
0	0	0	0	0	0	0	0	0	0	0	0	0	0	0	0	0	0	0	0	0	0	0	0	0	0	0	0	0	0	0	0	0	0	0	0	0	0	0	0	0	0	0	0	0	0	0	0	0	0
0	0	0	0	0	0	0	0	0	0	0	0	0	0	0	0	0	0	0	0	0	0	0	0	0	0	0	0	0	0	0	0	0	0	0	0	0	0	0	0	0	0	0	0	0	0	0	0	0	0
0	0	0	0	0	0	0	0	0	0	0	0	0	0	0	0	0	0	0	0	0	0	0	0	0	0	0	0	0	0	0	0	0	0	0	0	0	0	0	0	0	0	0	0	0	0	0	0	0	0
0	0	0	0	0	0	0	0	0	0	0	0	0	0	0	0	0	0	0	0	0	0	0	0	0	0	0	0	0	0	0	0	0	0	0	0	0	0	0	0	0	0	0	0	0	0	0	0	0	0
0	0	0	0	0	0	0	0	0	0	0	0	0	0	0	0	0	0	0	0	0	0	0	0	0	0	0	0	0	0	0	0	0	0	0	0	0	0	0	0	0	0	0	0	0	0	0	0	0	0
0	0	0	0	0	0	0	0	0	0	0	0	0	0	0	0	0	0	0	0	0	0	0	0	0	0	0	0	0	0	0	0	0	0	0	0	0	0	0	0	0	0	0	0	0	0	0	0	0	0
0	0	0	0	0	0	0	0	0	0	0	0	0	0	0	0	0	0	0	0	0	0	0	0	0	0	0	0	0	0	0	0	0	0	0	0	0	0	0	0	0	0	0	0	0	0	0	0	0	0
0	0	0	0	0	0	0	0	0	0	0	0	0	0	0	0	0	0	0	0	0	0	0	0	0	0	0	0	0	0	0	0	0	0	0	0	0	0	0	0	0	0	0	0	0	0	0	0	0	0
0	0	0	0	0	0	0	0	0	0	0	0	0	0	0	0	0	0	0	0	0	0	0	0	0	0	0	0	0	0	0	0	0	0	0	0	0	0	0	0	0	0	0	0	0	0	0	0	0	0
0	0	0	0	0	0	0	0	0	0	0	0	0	0	0	0	0	0	0	0	0	0	0	0	0	0	0	0	0	0	0	0	0	0	0	0	0	0	0	0	0	0	0	0	0	0	0	0	0	0
0	0	0	0	0	0	0	0	0	0	0	0	0	0	0	0	0	0	0	0	0	0	0	0	0	0	0	0	0	0	0	0	0	0	0	0	0	0	0	0	0	0	0	0	0	0	0	0	0	0
0	0	0	0	0	0	0	0	0	0	0	0	0	0	0	0	0	0	0	0	0	0	0	0	0	0	0	0	0	0	0	0	0	0	0	0	0	0	0	0	0	0	0	0	0	0	0	0	0	0
0	0	0	0	0	0	0	0	0	0	0	0	0	0	0	0	0	0	0	0	0	0	0	0	0	0	0	0	0	0	0	0	0	0	0	0	0	0	0	0	0	0	0	0	0	0	0	0	0	0
0	0	0	0	0	0	0	0	0	0	0	0	0	0	0	0	0	0	0	0	0	0	0	0	0	0	0	0	0	0	0	0	0	0	0	0	0	0	0	0	0	0	0	0	0	0	0	0	0	0
0	0	0	0	0	0	0	0	0	0	0	0	0	0	0	0	0	0	0	0	0	0	0	0	0	0	0	0	0	0	0	0	0	0	0	0	0	0	0	0	0	0	0	0	0	0	0	0	0	0
0	0	0	0	0	0	0	0	0	0	0	0	0	0	0	0	0	0	0	0	0	0	0	0	0	0	0	0	0	0	0	0	0	0	0	0	0	0	0	0	0	0	0	0	0	0	0	0	0	0
0	0	0	0	0	0	0	0	0	0	0	0	0	0	0	0	0	0	0	0	0	0	0	0	0	0	0	0	0	0	0	0	0	0	0	0	0	0	0	0	0	0	0	0	0	0	0	0	0	0
0	0	0	0	0	0	0	0	0	0	0	0	0	0	0	0	0	0	0	0	0	0	0	0	0	0	0	0	0	0	0	0	0	0	0	0	0	0	0	0	0	0	0	0	0	0	0	0	0	0
0	0	0	0	0	0	0	0	0	0	0	0	0	0	0	0	0	0	0	0	0	0	0	0	0	0	0	0	0	0	0	0	0	0	0	0	0	0	0	0	0	0	0	0	0	0	0	0	0	0
0	0	0	0	0	0	0	0	0	0	0	0	0	0	0	0	0	0	0	0	0	0	0	0	0	0	0	0	0	0	0	0	0	0	0	0	0	0	0	0	0	0	0	0	0	0	0	0	0	0
0	0	0	0	0	0	0	0	0	0	0	0	0	0	0	0	0	0	0	0	0	0	0	0	0	0	0	0	0	0	0	0	0	0	0	0	0	0	0	0	0	0	0	0	0	0	0	0	0	0
0	0	0	0	0	0	0	0	0	0	0	0	0	0	0	0	0	0	0	0	0	0	0.0689549	0.0683733	0.00346365	0	0	0	0	0	0	0	0	0	0	0	0	0	0	0	0	0	0	0	0	0	0	0	0	0
0	0	0	0	0	0	0	0	0	0	0	0	0	0	0	0	0	0	0	0	0	0.071245	0.099778	0.0816988	0.0613079	0.0270263	0.0326936	0.0210603	0	0	0	0	0	0	0	0	0	0	0	0	0	0	0	0	0	0	0	0	0	0
0	0	0	0	0	0	0	0	0	0	0	0	0	0	0	0	0	0	0	0	0	0.0976852	0.0973035	0.0624398	0.0581214	0.0560406	0.0638199	0.0532209	0.0721852	0.0561434	0	0	0	0	0	0	0	0	0	0	0	0	0	0	0	0	0	0	0	0
0	0	0	0	0	0	0	0	0	0	0	0	0	0	0	0	0	0	0	0	0.0928681	0.0653107	0.0922497	0.0893678	0.0548184	0.0870764	0.0614907	0.0473766	0.0440107	0.0230774	0.000824414	0.00481036	-0.00820188	0	0	0	0	0	0	0	0	0	0	0	0	0	0	0	0	0
0	0	0	0	0	0	0	0	0	0	0	0	0	0	0	0	0	0	0	0.0379788	0.0618559	0.0736857	0.0801774	0.0760614	0.0783844	0.0887259	0.0676196	0.0622098	0.0432092	0.0436731	0.0274836	0.029361	0.0139167	0.0202797	-0.000382276	0	0	0	0	0	0	0	0	0	0	0	0	0	0	0
0	0	0	0	0	0	0	0	0	0	0	0	0	0	0	0	0	0	0.0565057	0.0448363	0.067949	0.0690153	0.0694182	0.0742421	0.0780978	0.082709	0.0637188	0.0491472	0.043384	0.0545184	0.0388319	-4.38874e-05	0.00613962	0.0152026	-0.0056516	-0.0130748	0	0	0	0	0	0	0	0	0	0	0	0	0	0
0	0	0	0	0	0	0	0	0	0	0	0	0	0	0	0	0	0.0783343	0.0434822	0.0575279	0.0625627	0.072741	0.0820664	0.0832934	0.0740114	0.0703469	0.062587	0.0372124	0.0163684	0.0234898	0.046196	0.0195707	0.0209098	0.0143169	0.012705	-0.0155587	0	0	0	0	0	0	0	0	0	0	0	0	0	0
0	0	0	0	0	0	0	0	0	0	0	0	0	0	0	0	0	0.0561103	0.0522017	0.063426	0.0712177	0.0731164	0.0508948	0.0447371	0.0659407	0.0472939	0.0406234	0.0152371	0.025957	0.0103374	0.0218858	0.0185008	0.0211108	0.00393628	-0.00357876	0.00305935	0.000550937	0	0	0	0	0	0	0	0	0	0	0	0	0
0	0	0	0	0	0	0	0	0	0	0	0	0	0	0	0	0.0601498	0.0535545	0.0256516	0.0584393	0.0590876	0.060889	0.0425778	0.0377533	0.0359996	0.0325376	0.0267734	0.0206399	0.0189141	-0.00505018	0.00780086	0.00775943	0.00662529	0.0181357	-0.00406279	-0.00738684	0.00437898	-0.00660138	0	0	0	0	0	0	0	0	0	0	0	0
0	0	0	0	0	0	0	0	0	0	0	0	0	0	0	0	0.071059	0.0507087	0.0132658	0.0440776	0.0448444	0.0467722	0.0374739	0.0293897	0.0283818	0.0417844	0.0282094	0.0213177	0.0192087	-0.00470453	0.00262726	0.017853	-0.00290353	0.010065	-0.00201712	-0.00382281	0.00960658	-0.00913739	0	0	0	0	0	0	0	0	0	0	0	0
0	0	0	0	0	0	0	0	0	0	0	0	0	0	0	0	0.0630259	0.014463	-0.153022	-0.113185	0.0683177	0.0908583	-0.0294912	-0.127518	-0.132768	-0.0503586	0.026734	0.0195158	-0.0216081	-0.0268482	0.00198626	0.0254366	-0.00780125	0.00367884	0.0122909	0.021686	0.0133077	0.0029563	-0.00351951	0	0	0	0	0	0	0	0	0	0	0
0	0	0	0	0	0	0	0	0	0	0	0	0	0	0	0	0	0.043543	0.0208987	0.0281883	0.0282201	0.041113	0.0361925	0.0304394	0.0123005	0.0229382	0.0262708	0.017276	0.01108	0.00517511	0.0104536	0.0243257	0.00600258	0.00363373	0.000513204	0.00248884	0.0141629	0.0117238	0.0217348	0	0	0	0	0	0	0	0	0	0	0
0	0	0	0	0	0	0	0	0	0	0	0	0	0	0	0	0	0.039515	0.0210989	0.0214484	0.0178275	0.0198053	0.0305574	0.0194175	0.018394	0.0278994	0.0178485	0.0123843	0.0188501	0.00625171	0.0162301	0.0225006	0.00959952	0.0176546	0.0050287	0.00869153	0.0172672	0.0177334	0.0261848	0	0	0	0	0	0	0	0	0	0	0
0	0	0	0	0	0	0	0	0	0	0	0	0	0	0	0	0	0.0418095	0.0240634	0.0170761	-0.000579518	0.0220677	0.025078	0.0164001	0.0194165	0.0205247	0.0298111	0.0250561	0.0242853	0.00736135	0.0178159	0.0279586	0.0076799	0.00932535	0.00901034	0.011885	0.0133065	0.019717	0.0215822	0	0	0	0	0	0	0	0	0	0	0
0	0	0	0	0	0	0	0	0	0	0	0	0	0	0	0	0	0.0412807	0.0309088	0.0188766	0.0100522	0.0238619	0.0327203	0.0233561	0.00685981	0.00702043	0.0204125	0.0366385	0.0137414	0.00991598	0.0218027	0.0231224	0.0138344	0.0148744	0.00537655	0.0132457	0.0196922	0.02116	0.01975	0	0	0	0	0	0	0	0	0	0	0
0	0	0	0	0	0	0	0	0	0	0	0	0	0	0	0	0	0	0.0129553	0.0228405	0.016131	0.0299768	0.0362431	0.0352609	0.0277514	0.0318413	0.0249899	0.0328535	0.0189776	0.0102818	0.0142946	0.0311714	0.0123487	0.0349779	0.0184367	0.0212016	0.0222331	0.0229787	0	0	0	0	0	0	0	0	0	0	0	0
0	0	0	0	0	0	0	0	0	0	0	0	0	0	0	0	0	0	0.022522	0.025763	0.0203451	0.0161644	0.0174726	0.0223977	0.0163866	0.0349749	0.0361572	0.0334005	0.0364441	0.0199528	0.0342503	0.0398196	0.0248054	0.0412591	0.0229857	0.0212208	0.0144134	0.0147313	0	0	0	0	0	0	0	0	0	0	0	0
0	0	0	0	0	0	0	0	0	0	0	0	0	0	0	0	0	0	0	0	0	0	0.0223477	0.0233988	0.0226328	0.020177	0.0193161	0.0333317	0.0414663	0.0361925	0.049194	0.039331	0	0	0	0	0	0	0	0	0	0	0	0	0	0	0	0	0	0
0	0	0	0	0	0	0	0	0	0	0	0	0	0	0	0	0	0	0	0	0	0	0	0	0.034522	0.043414	0.0258421	0.04718	0.0318729	0.0336016	0	0	0	0	0	0	0	0	0	0	0	0	0	0	0	0	0	0	0	0
0	0	0	0	0	0	0	0	0	0	0	0	0	0	0	0	0	0	0	0	0	0	0	0	0	0	0	0	0	0	0	0	0	0	0	0	0	0	0	0	0	0	0	0	0	0	0	0	0	0
0	0	0	0	0	0	0	0	0	0	0	0	0	0	0	0	0	0	0	0	0	0	0	0	0	0	0	0	0	0	0	0	0	0	0	0	0	0	0	0	0	0	0	0	0	0	0	0	0	0
0	0	0	0	0	0	0	0	0	0	0	0	0	0	0	0	0	0	0	0	0	0	0	0	0	0	0	0	0	0	0	0	0	0	0	0	0	0	0	0	0	0	0	0	0	0	0	0	0	0
0	0	0	0	0	0	0	0	0	0	0	0	0	0	0	0	0	0	0	0	0	0	0	0	0	0	0	0	0	0	0	0	0	0	0	0	0	0	0	0	0	0	0	0	0	0	0	0	0	0
0	0	0	0	0	0	0	0	0	0	0	0	0	0	0	0	0	0	0	0	0	0	0	0	0	0	0	0	0	0	0	0	0	0	0	0	0	0	0	0	0	0	0	0	0	0	0	0	0	0
0	0	0	0	0	0	0	0	0	0	0	0	0	0	0	0	0	0	0	0	0	0	0	0	0	0	0	0	0	0	0	0	0	0	0	0	0	0	0	0	0	0	0	0	0	0	0	0	0	0
0	0	0	0	0	0	0	0	0	0	0	0	0	0	0	0	0	0	0	0	0	0	0	0	0	0	0	0	0	0	0	0	0	0	0	0	0	0	0	0	0	0	0	0	0	0	0	0	0	0
0	0	0	0	0	0	0	0	0	0	0	0	0	0	0	0	0	0	0	0	0	0	0	0	0	0	0	0	0	0	0	0	0	0	0	0	0	0	0	0	0	0	0	0	0	0	0	0	0	0
0	0	0	0	0	0	0	0	0	0	0	0	0	0	0	0	0	0	0	0	0	0	0	0	0	0	0	0	0	0	0	0	0	0	0	0	0	0	0	0	0	0	0	0	0	0	0	0	0	0
0	0	0	0	0	0	0	0	0	0	0	0	0	0	0	0	0	0	0	0	0	0	0	0	0	0	0	0	0	0	0	0	0	0	0	0	0	0	0	0	0	0	0	0	0	0	0	0	0	0
0	0	0	0	0	0	0	0	0	0	0	0	0	0	0	0	0	0	0	0	0	0	0	0	0	0	0	0	0	0	0	0	0	0	0	0	0	0	0	0	0	0	0	0	0	0	0	0	0	0
0	0	0	0	0	0	0	0	0	0	0	0	0	0	0	0	0	0	0	0	0	0	0	0	0	0	0	0	0	0	0	0	0	0	0	0	0	0	0	0	0	0	0	0	0	0	0	0	0	0
0	0	0	0	0	0	0	0	0	0	0	0	0	0	0	0	0	0	0	0	0	0	0	0	0	0	0	0	0	0	0	0	0	0	0	0	0	0	0	0	0	0	0	0	0	0	0	0	0	0
0	0	0	0	0	0	0	0	0	0	0	0	0	0	0	0	0	0	0	0	0	0	0	0	0	0	0	0	0	0	0	0	0	0	0	0	0	0	0	0	0	0	0	0	0	0	0	0	0	0
0	0	0	0	0	0	0	0	0	0	0	0	0	0	0	0	0	0	0	0	0	0	0	0	0	0	0	0	0	0	0	0	0	0	0	0	0	0	0	0	0	0	0	0	0	0	0	0	0	0
0	0	0	0	0	0	0	0	0	0	0	0	0	0	0	0	0	0	0	0	0	0	0	0	0	0	0	0	0	0	0	0	0	0	0	0	0	0	0	0	0	0	0	0	0	0	0	0	0	0
0	0	0	0	0	0	0	0	0	0	0	0	0	0	0	0	0	0	0	0	0	0	0	0	0	0	0	0	0	0	0	0	0	0	0	0	0	0	0	0	0	0	0	0	0	0	0	0	0	0
0	0	0	0	0	0	0	0	0	0	0	0	0	0	0	0	0	0	0	0	0	0	0	0	0	0	0	0	0	0	0.00948294	0.0105959	0.00251836	0.02226	0.0119632	0.0122063	0.0211242	0	0	0	0	0	0	0	0	0	0	0	0	0
0	0	0	0	0	0	0	0	0	0	0	0	0	0	0	0	0	0	0	0	0	0	0	0	0	0.0193287	-0.0261086	-0.0172528	-0.00344131	-0.0173282	0.00620503	0.0116429	0.00429094	0.0177816	0.00687711	0.0119844	0.0247907	0.0130318	0.018242	0	0	0	0	0	0	0	0	0	0	0
0	0	0	0	0	0	0	0	0	0	0	0	0	0	0	0	0	0	0	0	0	0	0	0	0.0364071	-0.00257632	-0.0456313	-0.0303574	-0.0414716	-0.0262662	-0.019047	0.00911242	0.0070842	-0.000599673	-0.00928939	0.00484392	0.0203635	0.0154561	0.00968416	0.0141552	0	0	0	0	0	0	0	0	0	0
0	0	0	0	0	0	0	0	0	0	0	0	0	0	0	0	0	0	0	0	0	0	0	0.0353963	0.0243845	-0.0129977	-0.0195793	-0.00646843	-0.0304301	-0.0369565	-0.0634694	-0.0394842	-0.02539	0.0421527	0.0145388	0.00404257	0.00916432	0.0110201	0.0210185	0.0146682	0.018065	0	0	0	0	0	0	0	0	0
0	0	0	0	0	0	0	0	0	0	0	0	0	0	0	0	0	0	0	0	0	0	0	0.0339227	0.00860261	-0.00134935	0.0182101	-0.0217749	-0.0106235	-0.0425226	-0.0593176	-0.0508889	-0.0395714	0.0286909	0.0270908	0.0252282	0.00912187	0.0134395	0.0208867	0.0129821	0.0180071	0.0109243	0.00781633	0	0	0	0	0	0	0
0	0	0	0	0	0	0	0	0	0	0	0	0	0	0	0	0	0	0	0	0	0	0	0.0581129	0.00205767	0.00107649	0.0126118	0.0264324	-0.0102707	-0.0551297	-0.0509217	-0.0533718	-0.0549555	-0.0344899	-0.0018184	0.00612904	0.0419794	0.0374014	0.0147929	0.012326	0.0146324	0.0188638	0.0186099	0.0226328	0	0	0	0	0	0
0	0	0	0	0	0	0	0	0	0	0	0	0	0	0	0	0	0	0	0	0	0	0	0.0158171	-0.0394243	-0.00978851	-0.0329244	-0.0564268	-0.0602373	-0.06615	-0.0718967	-0.0430266	-0.0607957	-0.0518679	-0.0337389	-0.0136421	0.00881601	0.0164777	0.0154548	0.0127899	0.017813	0.00233361	0.00175581	0.00986849	0.00317058	0	0	0	0	0
0	0	0	0	0	0	0	0	0	0	0	0	0	0	0	0	0	0	0	0	0	0	0	0.0307159	0.00199987	-0.023361	-0.0393926	-0.0428848	-0.0259215	-0.0805776	-0.0554955	-0.0386297	-0.0549049	-0.0401066	-0.0351725	-0.0203792	0.00919063	0.0207453	0.020678	0.0202176	0.0215789	0.0120745	0.00774799	0.0230744	0.00666306	0.0228329	0	0	0	0
0	0	0	0	0	0	0	0	0	0	0	0	0	0	0	0	0	0	0	0	0	0	0	0	0.0116931	-0.0308336	-0.0586604	-0.0319865	0.0102651	-0.0865277	-0.0443338	-0.0349613	-0.04802	-0.0434898	-0.0370328	-0.0177502	0.00809411	0.0271871	0.0162222	0.0273815	0.020871	0.0254836	0.00538074	0.0153531	0.0131558	0.018563	0	0	0	0
0	0	0	0	0	0	0	0	0	0	0	0	0	0	0	0	0	0	0	0	0	0	0	0	0.0127387	-0.0225324	-0.0618175	0.00349445	-0.0274057	-0.0730831	-0.0461304	-0.0414195	-0.049601	-0.0407474	-0.0284294	-0.0202873	0.00274219	0.0212827	0.0257162	0.0273817	0.016433	0.0144587	0.0163958	0.0153902	-0.00404687	0.0155827	0	0	0	0
0	0	0	0	0	0	0	0	0	0	0	0	0	0	0	0	0	0	0	0	0	0	0	0	0.0292398	-0.000886332	-0.0402742	-0.0189788	-0.0641356	-0.046674	-0.0338909	-0.031434	-0.0433861	-0.0333892	-0.0433534	-0.0091607	0.01228	0.0286865	0.0283201	0.0235222	0.0157766	0.0221055	0.00852398	-0.00379795	1.79774e-05	-0.00228651	0	0	0	0
0	0	0	0	0	0	0	0	0	0	0	0	0	0	0	0	0	0	0	0	0	0	0	0	0.00966068	-0.0227397	-0.0303084	-0.0490558	-0.0343301	-0.0181362	-0.0155011	-0.0396718	-0.0309836	-0.0307235	-0.0336867	-0.00982858	-0.0045601	0.0141631	0.0257853	0.0245646	0.0208615	0.0233887	0.010738	-0.00929083	-0.00138182	-0.00630791	0	0	0	0
0	0	0	0	0	0	0	0	0	0	0	0	0	0	0	0	0	0	0	0	0	0	0	0	0	-0.000497223	-0.0358777	-0.014678	0.015943	-0.0281108	-0.00661411	0.000204368	-0.00909423	-0.0124188	-0.0220243	-0.0141261	-0.0102342	0.0194338	0.0192232	0.031476	0.0269058	0.0140373	-0.00034745	-0.0161958	-0.0090675	-0.00681903	0	0	0	0
0	0	0	0	0	0	0	0	0	0	0	0	0	0	0	0	0	0	0	0	0	0	0	0	0	0	0.0164053	0.0357168	0.0358923	-0.00858301	0.0331188	0.00252014	0.00459189	0.0123538	-0.0251994	0.00508717	0.0101684	0.0192432	0.0163686	0.0211226	0.0176313	-0.00469708	-0.00795461	-0.0107923	0	0	0	0	0	0
0	0	0	0	0	0	0	0	0	0	0	0	0	0	0	0	0	0	0	0	0	0	0	0	0	0	0	0.0211087	0.0366746	0.016882	0.0102741	0.0111154	-0.00723116	-0.00329381	-0.0139646	0.0074015	0.0123156	0.00799772	0.00278346	0.0169984	0.0232836	0.0202611	0.0185698	0	0	0	0	0	0	0
0	0	0	0	0	0	0	0	0	0	0	0	0	0	0	0	0	0	0	0	0	0	0	0	0	0	0	0.0217289	0.0248194	0.0247536	0.0362257	0.0358506	0.031517	0.0313673	0.0311307	0.0292949	0.0249192	0.0166963	0.0144695	0.00628757	0.00795014	0.000239501	0	0	0	0	0	0	0	0
0	0	0	0	0	0	0	0	0	0	0	0	0	0	0	0	0	0	0	0	0	0	0	0	0	0	0	0	0.0296537	0.0268394	0.0300806	0.0363545	0.0336189	0.0385218	0.0481699	0.0326247	0.00936171	0.0041056	-0.00550985	-0.00101856	0.00598697	0	0	0	0	0	0	0	0	0
0	0	0	0	0	0	0	0	0	0	0	0	0	0	0	0	0	0	0	0	0	0	0	0	0	0	0	0	0	0.0238626	0.0392736	0.0284103	0.0203577	0.0328769	0.0224513	0.0283996	0.0120474	0.00661749	-0.000675123	0.00615907	0	0	0	0	0	0	0	0	0	0
0	0	0	0	0	0	0	0	0	0	0	0	0	0	0	0	0	0	0	0	0	0	0	0	0	0	0	0	0	0	0.0429967	0.0367528	0.0200447	0.0227538	0.0227809	0.0213735	0.0128738	0.00335154	0	0	0	0	0	0	0	0	0	0	0	0
0	0	0	0	0	0	0	0	0	0	0	0	0	0	0	0	0	0	0	0	0	0	0	0	0	0	0	0	0	0	0	0	0	0	0	0	0	0	0	0	0	0	0	0	0	0	0	0	0	0
0	0	0	0	0	0	0	0	0	0	0	0	0	0	0	0	0	0	0	0	0	0	0	0	0	0	0	0	0	0	0	0	0	0	0	0	0	0	0	0	0	0	0	0	0	0	0	0	0	0
0	0	0	0	0	0	0	0	0	0	0	0	0	0	0	0	0	0	0	0	0	0	0	0	0	0	0	0	0	0	0	0	0	0	0	0	0	0	0	0	0	0	0	0	0	0	0	0	0	0
0	0	0	0	0	0	0	0	0	0	0	0	0	0	0	0	0	0	0	0	0	0	0	0	0	0	0	0	0	0	0	0	0	0	0	0	0	0	0	0	0	0	0	0	0	0	0	0	0	0
0	0	0	0	0	0	0	0	0	0	0	0	0	0	0	0	0	0	0	0	0	0	0	0	0	0	0	0	0	0	0	0	0	0	0	0	0	0	0	0	0	0	0	0	0	0	0	0	0	0
0	0	0	0	0	0	0	0	0	0	0	0	0	0	0	0	0	0	0	0	0	0	0	0	0	0	0	0	0	0	0	0	0	0	0	0	0	0	0	0	0	0	0	0	0	0	0	0	0	0
0	0	0	0	0	0	0	0	0	0	0	0	0	0	0	0	0	0	0	0	0	0	0	0	0	0	0	0	0	0	0	0	0	0	0	0	0	0	0	0	0	0	0	0	0	0	0	0	0	0
0	0	0	0	0	0	0	0	0	0	0	0	0	0	0	0	0	0	0	0	0	0	0	0	0	0	0	0	0	0	0	0	0	0	0	0	0	0	0	0	0	0	0	0	0	0	0	0	0	0
0	0	0	0	0	0	0	0	0	0	0	0	0	0	0	0	0	0	0	0	0	0	0	0	0	0	0	0	0	0	0	0	0	0	0	0	0	0	0	0	0	0	0	0	0	0	0	0	0	0
0	0	0	0	0	0	0	0	0	0	0	0	0	0	0	0	0	0	0	0	0	0	0	0	0	0	0	0	0	0	0	0	0	0	0	0	0	0	0	0	0	0	0	0	0	0	0	0	0	0
0	0	0	0	0	0	0	0	0	0	0	0	0	0	0	0	0	0	0	0	0	0	0	0	0	0	0	0	0	0	0	0	0	0	0	0	0	0	0	0	0	0	0	0	0	0	0	0	0	0
0	0	0	0	0	0	0	0	0	0	0	0	0	0	0	0	0	0	0	0	0	0	0	0	0	0	0	0	0	0	0	0	0	0	0	0	0	0	0	0	0	0	0	0	0	0	0	0	0	0
0	0	0	0	0	0	0	0	0	0	0	0	0	0	0	0	0	0	0	0	0	0	0	0	0	0	0	0	0	0	0	0	0	0	0	0	0	0	0	0	0	0	0	0	0	0	0	0	0	0
0	0	0	0	0	0	0	0	0	0	0	0	0	0	0	0	0	0	0	0	0	0	0	0	0	0	0	0	0	0	0	0	0	0	0	0	0	0	0	0	0	0	0	0	0	0	0	0	0	0
0	0	0	0	0	0	0	0	0	0	0	0	0	0	0	0	0	0	0	0	0	0	0	0	0	0	0	0	0	0	0	0	0	0	0	0	0	0	0	0	0	0	0	0	0	0	0	0	0	0
0	0	0	0	0	0	0	0	0	0	0	0	0	0	0	0	0	0	0	0	0	0	0	0	0	0	0	0	0	0	0	0	0	0	0	0	0	0	0	0	0	0	0	0	0	0	0	0	0	0
0	0	0	0	0	0	0	0	0	0	0	0	0	0	0	0	0	0	0	0	0	0	0	0	0	0	0	0	0	0	0	0	0	0	0	0	0	0	0	0	0	0	0	0	0	0	0	0	0	0
0	0	0	0	0	0	0	0	0	0	0	0	0	0	0	0	0	0	0	0	0	0	0	0	0	0	0	0	0	0	0	0	0	0	0	0	0	0	0	0	0	0	0	0	0	0	0	0	0	0
0	0	0	0	0	0	0	0	0	0	0	0	0	0	0	0	0	0	0	0	0	0	0	0	0	0	0	0	0	0	0	0	0	0	0	0	0	0	0	0	0	0	0	0	0	0	0	0	0	0
0	0	0	0	0	0	0	0	0	0	0	0	0	0	0	0	0	0	0	0	0	0	0	0	0	0	0	0	0	0	0	0	0	0	0	0	0	0	0	0	0	0	0	0	0	0	0	0	0	0
0	0	0	0	0	0	0	0	0	0	0	0	0	0	0	0	0	0	0	0	0	0	0	0	0	0	0	0	0	0	0	0	0	0	0	0	0	0	0	0	0	0	0	0	0	0	0	0	0	0
0	0	0	0	0	0	0	0	0	0	0	0	0	0	0	0	0	0	0	0	0	0	0	0	0	0	0	0	0	0	0	0	0	0	0	0	0	0	0	0	0	0	0	0	0	0	0	0	0	0
0	0	0	0	0	0	0	0	0	0	0	0	0	0	0	0	0	0	0	0	0	0	0	0	0	0	0	0	0	0	0	0	0	0	0	0	0	0	0	0	0	0	0	0	0	0	0	0	0	0
0	0	0	0	0	0	0	0	0	0	0	0	0	0	0	0	0	0	0	0	0	0	0	0	0	0	0	0	0	0	0	0	0	0	0	0	0	0	0	0	0	0	0	0	0	0	0	0	0	0
0	0	0	0	0	0	0	0	0	0	0	0	0	0	0	0	0	0	0	0	0	0	0	0	0	0	0	0	0	0	0	0	0	0	0	0	0	0	0	0	0	0	0	0	0	0	0	0	0	0
0	0	0	0	0	0	0	0	0	0	0	0	0	0	0	0	0	0	0	0	0	0	0	0	0	0	0	0	0	0	0	0	0	0	0	0	0	0	0	0	0	0	0	0	0	0	0	0	0	0
0	0	0	0	0	0	0	0	0	0	0	0	0	0	0	0	0	0	0	0	0	0	0	0	0	0	0	0	0	0	0	0	0	0	0	0	0	0	0	0	0	0	0	0	0	0	0	0	0	0
0	0	0	0	0	0	0	0	0	0	0	0	0	0	0	0	0	0	0	0	0	0	0	0	0	0	0	0	0	0	0	0	0	0	0	0	0	0	0	0	0	0	0	0	0	0	0	0	0	0
0	0	0	0	0	0	0	0	0	0	0	0	0	0	0	0	0	0	0	0	0	0	0	0	0	0	0	0	0	0	0	0	0	0	0.0296061	0.00550931	0.00166356	0.00412895	0.00111742	0.00170199	0.0149164	0.0144	-0.00449522	0	0	0	0	0	0	0
0	0	0	0	0	0	0	0	0	0	0	0	0	0	0	0	0	0	0	0	0	0	0	0	0	0	0	0	0	0	0	0	0	0.0128836	0.00783165	-0.0091077	0.000274784	0.000369676	-0.00821715	-0.00258381	0.00581781	-0.008209	0.00221496	-0.000958954	0	0	0	0	0	0
0	0	0	0	0	0	0	0	0	0	0	0	0	0	0	0	0	0	0	0	0	0	0	0	0	0	0	0	0	0	0	0	0.0043415	0.00117797	0.000148282	-0.00120428	0.00779369	0.00643766	0.0153175	0.0110611	0.00897277	0.0106236	0.00332419	-0.00986273	-0.000910651	0	0	0	0	0
0	0	0	0	0	0	0	0	0	0	0	0	0	0	0	0	0	0	0	0	0	0	0	0	0	0	0	0	0	0	0	0.022971	-0.000238109	0.0104944	0.00477052	0.00140286	0.0023659	0.00748531	0.00610766	0.0096933	0.0419377	0.0138782	0.0104475	-0.00670384	-0.000598817	0.0131686	0	0	0	0
0	0	0	0	0	0	0	0	0	0	0	0	0	0	0	0	0	0	0	0	0	0	0	0	0	0	0	0	0	0	0.0257528	0.0299239	-0.000538361	0.0188365	0.016708	0.0144782	0.0110663	0.0135672	0.00635256	0.00490968	0.00611948	0.0107121	0.0102381	0.0121458	-0.0139791	0.0106492	6.76348e-06	0	0	0
0	0	0	0	0	0	0	0	0	0	0	0	0	0	0	0	0	0	0	0	0	0	0	0	0	0	0	0	0	0.0166472	0.011642	0.014621	-0.00314842	0.0112318	0.00382741	-0.00948273	-0.00317243	-0.00712397	-0.0049049	0.00986232	-0.00215453	0.00711268	0.00869737	0.00757538	0.0112728	-0.00842027	-0.00100557	-3.09543e-05	0	0
0	0	0	0	0	0	0	0	0	0	0	0	0	0	0	0	0	0	0	0	0	0	0	0	0	0	0	0	0	0.0482637	0.0520224	0.0777978	0.0779899	0.0690941	0.0207233	-0.0188482	-0.0537432	-0.0894087	-0.112161	-0.101229	-0.0914949	-0.0689097	0.00409202	0.0307681	0.037918	0.017869	-0.0259315	-0.0374441	0	0
0	0	0	0	0	0	0	0	0	0	0	0	0	0	0	0	0	0	0	0	0	0	0	0	0	0	0	0	0	0.0111591	0.0151608	0.0099634	-0.00796166	0.000603508	-0.00570948	-0.0102324	-0.0234449	-0.0248158	-0.029194	-0.0351865	-0.0304947	-0.0281222	-0.0271343	0.00243239	0.000968533	0.00434259	-0.00798783	-0.00377078	-0.00999378	0
0	0	0	0	0	0	0	0	0	0	0	0	0	0	0	0	0	0	0	0	0	0	0	0	0	0	0	0	0	0.00386579	0.011008	0.020967	-0.00642725	-0.00518584	-0.00700122	-0.00462562	-0.00821222	-0.0156779	-0.0296	-0.0370793	-0.0407802	-0.0537952	-0.0467865	-0.0196469	-0.0256721	0.00533555	0.00197088	4.426e-05	-0.00124277	-0.00394061
0	0	0	0	0	0	0	0	0	0	0	0	0	0	0	0	0	0	0	0	0	0	0	0	0	0	0	0	0	0.00488666	0.0179665	0.00973415	-0.00703898	-0.00185379	-0.0162018	-0.0137935	-0.0305654	-0.0507659	-0.049859	-0.0379877	-0.0336531	-0.0427587	-0.0304068	-0.0253792	-0.023791	-0.0156392	-0.00915826	0.00709244	0.005472	0.00404952
0	0	0	0	0	0	0	0	0	0	0	0	0	0	0	0	0	0	0	0	0	0	0	0	0	0	0	0	0	2.7427e-05	0.0148768	0.00978457	-0.0052115	0.00060253	-0.0102802	-0.0206284	-0.0292135	-0.0497108	-0.0485743	-0.0351244	-0.033022	-0.030275	-0.0551897	-0.0356952	-0.0538935	-0.0336692	-0.0226398	-8.1281e-05	-0.00319043	-0.00677941
0	0	0	0	0	0	0	0	0	0	0	0	0	0	0	0	0	0	0	0	0	0	0	0	0	0	0	0	0	0.0101824	0.0173813	0.0111227	-0.0172688	-0.00379736	-0.016499	-0.017524	-0.0116017	-0.0527748	-0.0432313	-0.046015	-0.0388573	-0.0512617	-0.0445351	-0.0343549	-0.0445136	-0.0337774	-0.0207989	-0.00669932	-0.00835956	-0.0160679
0	0	0	0	0	0	0	0	0	0	0	0	0	0	0	0	0	0	0	0	0	0	0	0	0	0	0	0	0	0	0.00565182	0.00965843	0.0102066	-0.00735517	-0.018659	-0.0244318	-0.0559485	-0.0366821	-0.0317571	-0.0553462	-0.0344517	-0.0339741	-0.0443887	-0.0515818	-0.0670969	-0.054146	-0.0374958	-0.0296848	-0.0278856	-0.0220718
0	0	0	0	0	0	0	0	0	0	0	0	0	0	0	0	0	0	0	0	0	0	0	0	0	0	0	0	0	0	0.017697	0.0143184	-0.000962847	0.0107943	-0.0209271	-0.0360903	-0.0484275	-0.048414	-0.0349375	-0.055563	-0.0390006	-0.0576864	-0.0534374	-0.0479446	-0.0590809	-0.0524865	-0.0326656	-0.0262592	-0.00842249	-0.0140215
0	0	0	0	0	0	0	0	0	0	0	0	0	0	0	0	0	0	0	0	0	0	0	0	0	0	0	0	0	0	0	0.0187023	0.00236456	0.0202908	-0.0221232	-0.0303822	-0.028065	-0.0143034	-0.0422446	-0.0449043	-0.0320243	-0.0416889	-0.0265353	-0.0313849	-0.0348782	-0.0485808	-0.0608285	-0.0491906	-0.0172627	-0.0218253
0	0	0	0	0	0	0	0	0	0	0	0	0	0	0	0	0	0	0	0	0	0	0	0	0	0	0	0	0	0	0	0	0.00194064	0.0184969	0.0352179	0.000195866	-0.0133824	-0.0327774	-0.044333	-0.0383827	-0.0237834	-0.0497068	-0.0379469	-0.0100438	-0.0252107	-0.0188332	-0.0311824	-0.0193058	-0.0264028	-0.00825611
0	0	0	0	0	0	0	0	0	0	0	0	0	0	0	0	0	0	0	0	0	0	0	0	0	0	0	0	0	0	0	0	0	0.0169158	0.0229354	0.0199162	-0.00444021	-0.0311413	-0.036134	-0.0279435	-0.00984254	-0.0331212	-0.037803	-0.0135855	-0.0280402	-0.00220645	-0.0111039	0.00125363	0.0183027	-0.00519417
0	0	0	0	0	0	0	0	0	0	0	0	0	0	0	0	0	0	0	0	0	0	0	0	0	0	0	0	0	0	0	0	0	0	0.00888556	0.0193078	0.0146642	-0.00514516	-0.00651779	-0.0300015	-0.0380391	-0.028376	-0.0449785	-0.0213672	-0.0192157	-0.0109361	0.0108825	0.0242001	0.0240998	0.00900878
0	0	0	0	0	0	0	0	0	0	0	0	0	0	0	0	0	0	0	0	0	0	0	0	0	0	0	0	0	0	0	0	0	0	0	0.0220806	0.0253744	0.00606357	-0.0076259	-0.0141739	-0.00125641	-0.0226142	-0.00919661	-0.00879767	0.00196024	0.0230011	0.0388448	0.0316724	0.0196445	0.0256885
0	0	0	0	0	0	0	0	0	0	0	0	0	0	0	0	0	0	0	0	0	0	0	0	0	0	0	0	0	0	0	0	0	0	0	0	0.0363416	0.0267055	0.00476566	-0.000520222	-0.014556	-0.00765943	-0.0155251	-0.00751548	0.0246935	0.046867	0.0340086	0.0287769	0.0206217	0.0290908
0	0	0	0	0	0	0	0	0	0	0	0	0	0	0	0	0	0	0	0	0	0	0	0	0	0	0	0	0	0	0	0	0	0	0	0	0	0	0	0.028943	0.0253853	0.017909	0.01177	0.0190116	0.0459982	0.0452024	0.0392534	0.0352763	0.0180268	0
0	0	0	0	0	0	0	0	0	0	0	0	0	0	0	0	0	0	0	0	0	0	0	0	0	0	0	0	0	0	0	0	0	0	0	0	0	0	0	0	0	0	0	0	0	0	0	0	0	0
0	0	0	0	0	0	0	0	0	0	0	0	0	0	0	0	0	0	0	0	0	0	0	0	0	0	0	0	0	0	0	0	0	0	0	0	0	0	0	0	0	0	0	0	0	0	0	0	0	0
0	0	0	0	0	0	0	0	0	0	0	0	0	0	0	0	0	0	0	0	0	0	0	0	0	0	0	0	0	0	0	0	0	0	0	0	0	0	0	0	0	0	0	0	0	0	0	0	0	0
0	0	0	0	0	0	0	0	0	0	0	0	0	0	0	0	0	0	0	0	0	0	0	0	0	0	0	0	0	0	0	0	0	0	0	0	0	0	0	0	0	0	0	0	0	0	0	0	0	0
0	0	0	0	0	0	0	0	0	0	0	0	0	0	0	0	0	0	0	0	0	0	0	0	0	0	0	0	0	0	0	0	0	0	0	0	0	0	0	0	0	0	0	0	0	0	0	0	0	0
0	0	0	0	0	0	0	0	0	0	0	0	0	0	0	0	0	0	0	0	0	0	0	0	0	0	0	0	0	0	0	0	0	0	0	0	0	0	0	0	0	0	0	0	0	0	0	0	0	0
0	0	0	0	0	0	0	0	0	0	0	0	0	0	0	0	0	0	0	0	0	0	0	0	0	0	0	0	0	0	0	0	0	0	0	0	0	0	0	0	0	0	0	0	0	0	0	0	0	0
0	0	0	0	0	0	0	0	0	0	0	0	0	0	0	0	0	0	0	0	0	0	0	0	0	0	0	0	0	0	0	0	0	0	0	0	0	0	0	0	0	0	0	0	0	0	0	0	0	0
0	0	0	0	0	0	0	0	0	0	0	0	0	0	0	0	0	0	0	0	0	0	0	0	0	0	0	0	0	0	0	0	0	0	0	0	0	0	0	0	0	0	0	0	0	0	0	0	0	0
0	0	0	0	0	0	0	0	0	0	0	0	0	0	0	0	0	0	0	0	0	0	0	0	0	0	0	0	0	0	0	0	0	0	0	0	0	0	0	0	0	0	0	0	0	0	0	0	0	0
0	0	0	0	0	0	0	0	0	0	0	0	0	0	0	0	0	0	0	0	0	0	0	0	0	0	0	0	0	0	0	0	0	0	0	0	0	0	0	0	0	0	0	0	0	0	0	0	0	0
0	0	0	0	0	0	0	0	0	0	0	0	0	0	0	0	0	0	0	0	0	0	0	0	0	0	0	0	0	0	0	0	0	0	0	0	0	0	0	0	0	0	0	0	0	0	0	0	0	0
0	0	0	0	0	0	0	0	0	0	0	0	0	0	0	0	0	0	0	0	0	0	0	0	0	0	0	0	0	0	0	0	0	0	0	0	0	0	0	0	0	0	0	0	0	0	0	0	0	0
0	0	0	0	0	0	0	0	0	0	0	0	0	0	0	0	0	0	0	0	0	0	0	0	0	0	0	0	0	0	0	0	0	0	0	0	0	0	0	0	0	0	0	0	0	0	0	0	0	0
0	0	0	0	0	0	0	0	0	0	0	0	0	0	0	0	0	0	0	0	0	0	0	0	0	0	0	0	0	0	0	0	0	0	0	0	0	0	0	0	0	0	0	0	0	0	0	0	0	0
0	0	0	0	0	0	0	0	0	0	0	0	0	0	0	0	0	0	0	0	0	0	0	0	0	0	0	0	0	0	0	0	0	0	0	0	0	0	0	0	0	0	0	0	0	0	0	0	0	0
0	0	0	0	0	0	0	0	0	0	0	0	0	0	0	0	0	0	0	0	0	0	0	0	0	0	0	0	0	0	0	0	0	0	0	0	0	0	0	0	0	0	0	0	0	0	0	0	0	0
0	0	0	0	0	0	0	0	0	0	0	0	0	0	0	0	0	0	0	0	0	0	0	0	0	0	0	0	0	0	0	0	0	0	0	0	0	0	0	0	0	0	0	0	0	0	0	0	0	0
0	0	0	0	0	0	0	0	0	0	0	0	0	0	0	0	0	0	0	0	0	0	0	0	0	0	0	0	0	0	0	0	0	0	0	0	0	0	0	0	0	0	0	0	0	0	0	0	0	0
0	0	0	0	0	0	0	0	0	0	0	0	0	0	0	0	0	0	0	0	0	0	0	0	0	0	0	0	0	0	0	0	0	0	0	0	0	0	0	0	0	0	0	0	0	0	0	0	0	0
0	0	0	0	0	0	0	0	0	0	0	0	0	0	0	0	0	0	0	0	0	0	0	0	0	0	0	0	0	0	0	0	0	0	0	0	0	0	0	0	0	0	0	0	0	0	0	0	0	0
0	0	0	0	0	0	0	0	0	0	0	0	0	0	0	0	0	0	0	0	0	0	0	0	0	0	0	0	0	0	0	0	0	0	0	0	0	0	0	0	0	0	0	0	0	0	0	0	0	0
0	0	0	0	0	0	0	0	0	0	0	0	0	0	0	0	0	0	0	0	0	0	0	0	0	0	0	0	0	0	0	0	0	0	0	0	0	0	0	0	0	0	0	0	0	0	0	0	0	0
0	0	0	0	0	0	0	0	0	0	0	0	0	0	0	0	0	0	0	0	0	0	0	0	0	0	0	0	0	0	0	0	0	0	0	0	0	0	0	0	0	0	0	0	0	0	0	0	0	0
0	0	0	0	0	0	0	0	0	0	0	0	0	0	0	0	0	0	0	0	0	0	0	0	0	0	0	0	0	0	0	0	0	0	0	0	0	0	0	0	0	0	0	0	0	0	0	0	0	0
0	0	0	0	0	0	0	0	0	0	0	0	0	0	0	0	0	0	0	0	0	0	0	0	0	0	0	0	0	0	0	0	0	0	0	0	0	0	0	0	0	0	0	0	0	0	0	0	0	0
0	0	0	0	0	0	0	0	0	0	0	0	0	0	0	0	0	0	0	0	0	0	0	0	0	0	0	0	0	0	0	0	0	0	0	0	0	0	0	0	0	0	0	0	0	0	0	0	0	0
0	0	0	0	0	0	0	0	0	0	0	0	0	0	0	0	0	0	0	0	0	0	0	0	0	0	0	0	0	0	0	0	0	0	0	0	0	0	0	0	0	0	0	0	0	0	0	0	0	0
0	0	0	0	0	0	0	0	0	0	0	0	0	0	0	0	0	0	0	0	0	0	0	0	0	0	0	0	0	0	0	0	0	0	0	0	0	0	0	0	0	0	0	0	0	0	0	0	0	0
0	0	0	0	0	0	0	0	0	0	0	0	0	0	0	0	0	0	0	0	0	0	0	0	0	0	0	0	0	0	0	0	0	0	0	0	0	0	0	0	0	0	0	0	0	0	0	0	0	0
0	0	0	0	0	0	0	0	0	0	0	0	0	0	0	0	0	0	0	0	0	0	0	0	0	0	0	0	0	0	0	0	0	0	0	0	0	0	0	0	0	0	0	0	0	0	0	0	0	0
0	0	0	0	0	0	0	0	0	0	0	0	0	0	0	0	0	0	0	0	0	0	0	0	0	0	0	0	0	0	0	0	0	0	0	0	0	0	0	0	0	0	0	0	0	0	0	0	0	0
0	0	0	0	0	0	0	0	0	0	0	0	0	0	0	0	0	0	0	0	0	0	0	0	0	0	0	0	0	0	0	0	0	0	0	0	0	0	0	0	0	0	0	0	0	0	0	0	0	0
0	0	0	0	0	0	0	0	0	0	0	0	0	0	0	0	0	0	0	0	0	0	0	0	0	0	0	0	0	0	0	0	0	0	0	0	0	0	0	0	0	0	0	0	0	0	0	0	0	0
0	0	0	0	0	0	0	0	0	0	0	0	0	0	0	0	0	0	0	0	0	0	0	0	0	0	0	0	0	0	0	0	0	0	0	0	0	0	0	0	0	0	0	0	0	0	0	0	0	0
0	0	0	0	0	0	0	0	0	0	0	0	0	0	0	0	0	0	0	0	0	0	0	0	0	0	0	0	0	0	0	0	0	0	0	0	0	0	0	0	0	0	0	0	0	0	0	0	0	0
0	0	0	0	0	0	0	0	0	0	0	0	0	0	0	0	0	0	0	0	0	0	0	0	0	0	0	0	0	0.0676138	0.0663412	0.0750257	0.0662375	0.0661213	0.0456489	0.0461931	0.0737244	0.0437318	0.00584757	0	0	0	0	0	0	0	0	0	0	0
0	0	0	0	0	0	0	0	0	0	0	0	0	0	0	0	0	0	0	0	0	0	0	0	0	0	0	0	0.0759935	0.0652093	0.0803235	0.0844662	0.0687727	0.0736572	0.0612019	0.0670978	0.0595563	0.0250915	0.0132756	0.00880981	-0.00111443	0	0	0	0	0	0	0	0	0
0	0	0	0	0	0	0	0	0	0	0	0	0	0	0	0	0	0	0	0	0	0	0	0	0	0	0.0639914	0.0437283	0.0623267	0.0494977	0.0716941	0.0649005	0.0474213	0.0526397	0.0485423	0.0524796	0.0147493	0.00795137	-0.00195788	-0.00474785	0.00363678	0.00145771	0	0	0	0	0	0	0	0
0	0	0	0	0	0	0	0	0	0	0	0	0	0	0	0	0	0	0	0	0	0	0	0	0	0.0353751	0.0344318	0.0497014	0.0664162	0.0302576	0.0420897	0.0569569	0.0443503	0.0451299	0.0370056	0.0199697	0.0242946	0.0196088	-0.0119758	0.00235002	0.00920753	0.0111622	0.00316764	0	0	0	0	0	0	0
0	0	0	0	0	0	0	0	0	0	0	0	0	0	0	0	0	0	0	0	0	0	0	0	0	0.0252031	0.0414231	0.0343846	0.0348651	0.03329	0.0387137	0.0468566	0.0309711	0.0433691	0.0118067	0.0222546	0.00687507	0.00998446	0.0257077	0.0231369	0.0219829	0.00213215	-0.00627637	0.0202103	0	0	0	0	0	0
0	0	0	0	0	0	0	0	0	0	0	0	0	0	0	0	0	0	0	0	0	0	0	0	0.0233525	0.0281775	0.0266152	0.0313806	0.0445303	0.041325	0.043367	0.0355932	0.0266383	0.0382601	0.0189071	0.0175962	-0.00297065	0.0116272	0.0284021	0.0276199	-0.00101428	-0.000260806	-0.00925271	0.017308	0.0067351	0	0	0	0	0
0	0	0	0	0	0	0	0	0	0	0	0	0	0	0	0	0	0	0	0	0	0	0	0	0.0502308	0.0342878	0.0419169	0.0463179	0.0575978	0.0252838	0.034587	0.0360516	0.0269176	0.0156964	0.0091654	-0.000306804	-0.00340769	0.0292586	0.0270609	0.03289	-0.00318616	0.00634549	0.00272481	0.0179384	0.0112681	0	0	0	0	0
0	0	0	0	0	0	0	0	0	0	0	0	0	0	0	0	0	0	0	0	0	0	0	0.0141443	0.0379072	0.0848494	0.0753138	0.100209	0.115488	0.0790442	0.0930989	0.0660012	0.047655	0.0792206	0.0732872	0.0216135	0.0226697	0.0373925	0.0472797	0.0648444	0.0536622	0.0148582	-0.00440728	0.00625766	0.00325568	-0.000768242	0	0	0	0
0	0	0	0	0	0	0	0	0	0	0	0	0	0	0	0	0	0	0	0	0	0	0	0.0376682	0.0119427	0.00858549	0.0280544	0.0316082	0.0519008	0.0417144	0.0406079	0.0673589	0.0418613	0.0393314	0.0441641	0.0283373	0.0211542	0.0225601	0.0104194	-6.0638e-05	-0.0101506	-0.00596767	0.00984119	0.00755157	-0.00136581	0.00399226	0	0	0	0
0	0	0	0	0	0	0	0	0	0	0	0	0	0	0	0	0	0	0	0	0	0	0.025976	0.0271814	0.0260189	0.0348735	0.0457815	0.0581453	0.0292201	0.0140191	0.0280502	0.0350826	0.0256516	0.0387398	0.039155	0.0126531	0.0141497	0.0149281	0.0221738	0.0131846	0.0109467	0.0160321	0.0111293	0.0164289	0.0050317	0.0186126	0	0	0	0
0	0	0	0	0	0	0	0	0	0	0	0	0	0	0	0	0	0	0	0	0	0	0.0216147	0.0212467	0.0262695	0.0326162	0.0255993	0.0478965	0.039613	0.0331321	0.0506831	0.0698826	0.0521294	0.043119	0.0269048	0.0180326	0.0288448	0.00925247	0.00944518	0.00769892	0.00107292	0.00701235	0.00898628	0.010659	0.00896489	0.00870623	0	0	0	0
0	0	0	0	0	0	0	0	0	0	0	0	0	0	0	0	0	0	0	0	0	0	0.035806	0.0152704	0.0143072	0.0303239	0.037344	0.0402459	0.0311415	0.0195739	0.0297866	0.0469446	0.0336091	0.0247125	0.0230464	0.0128804	0.0272311	0.0193091	0.0101747	0.0130696	0.0163646	0.00834484	0.0141007	0.0165309	0.00966207	0.0186566	0	0	0	0
0	0	0	0	0	0	0	0	0	0	0	0	0	0	0	0	0	0	0	0	0	0	0.0254662	0.0268934	0.00953554	0.0227599	0.0204126	0.0187232	0.0152865	0.0144348	0.0134704	0.0376834	0.0177869	0.0217776	0.010706	0.0267162	0.023746	0.0252457	0.0187092	0.0151124	0.0194525	0.0211467	0.00105114	0.0169586	0.0121614	0	0	0	0	0
0	0	0	0	0	0	0	0	0	0	0	0	0	0	0	0	0	0	0	0	0	0	0.0347492	0.0224183	0.0279365	0.0265732	0.0138704	0.0293867	0.0273763	0.0134461	0.0226995	0.0191069	0.00995721	0.0165396	0.030316	0.0290807	0.0214122	0.0121956	0.0219547	0.0174107	0.0180748	0.0217563	0.0161259	0.0160702	0.0174188	0	0	0	0	0
0	0	0	0	0	0	0	0	0	0	0	0	0	0	0	0	0	0	0	0	0	0	0.0354206	0.035148	0.024003	0.0229892	0.0197792	0.0245518	0.02492	0.00916308	0.0303146	0.0370315	0.0140934	0.0317364	0.0198997	0.0194732	0.0174868	0.0239474	0.0289848	0.0227853	0.0277995	0.0198453	0.0155282	0.0119494	0	0	0	0	0	0
0	0	0	0	0	0	0	0	0	0	0	0	0	0	0	0	0	0	0	0	0	0	0.0389697	0.0285872	0.0282282	0.0201569	0.0267704	0.0292842	0.0145789	0.0199343	0.0212033	0.0285378	0.0165848	0.029764	0.0295614	0.0258376	0.0211091	0.023057	0.0281519	0.0297225	0.0285395	0.0273578	0.0278149	0.0131151	0	0	0	0	0	0
0	0	0	0	0	0	0	0	0	0	0	0	0	0	0	0	0	0	0	0	0	0	0.0417385	0.0203367	0.0262388	0.02477	0.022963	0.0306518	0.0217801	0.0111081	0.0253673	0.023831	0.00543558	0.0252672	0.0256881	0.0280305	0.0288646	0.0299779	0.0232838	0.0195532	0.033052	0.0221246	0.00654114	0	0	0	0	0	0	0
0	0	0	0	0	0	0	0	0	0	0	0	0	0	0	0	0	0	0	0	0	0	0	0	0.0284077	0.0380868	0.0296093	0.0317931	0.0276496	0.0208	0.0299901	0.0391751	0.0281771	0.0324589	0.0322173	0.0462656	0.0389573	0.0324717	0.0387528	0.016386	0.0239464	0	0	0	0	0	0	0	0	0
0	0	0	0	0	0	0	0	0	0	0	0	0	0	0	0	0	0	0	0	0	0	0	0	0	0	0	0	0.0404296	0.0388156	0.0420139	0.0345855	0.0261661	0.0331052	0.0291274	0.0302092	0.0405627	0	0	0	0	0	0	0	0	0	0	0	0	0
0	0	0	0	0	0	0	0	0	0	0	0	0	0	0	0	0	0	0	0	0	0	0	0	0	0	0	0	0	0	0	0	0	0	0	0	0	0	0	0	0	0	0	0	0	0	0	0	0	0
0	0	0	0	0	0	0	0	0	0	0	0	0	0	0	0	0	0	0	0	0	0	0	0	0	0	0	0	0	0	0	0	0	0	0	0	0	0	0	0	0	0	0	0	0	0	0	0	0	0
0	0	0	0	0	0	0	0	0	0	0	0	0	0	0	0	0	0	0	0	0	0	0	0	0	0	0	0	0	0	0	0	0	0	0	0	0	0	0	0	0	0	0	0	0	0	0	0	0	0
0	0	0	0	0	0	0	0	0	0	0	0	0	0	0	0	0	0	0	0	0	0	0	0	0	0	0	0	0	0	0	0	0	0	0	0	0	0	0	0	0	0	0	0	0	0	0	0	0	0
0	0	0	0	0	0	0	0	0	0	0	0	0	0	0	0	0	0	0	0	0	0	0	0	0	0	0	0	0	0	0	0	0	0	0	0	0	0	0	0	0	0	0	0	0	0	0	0	0	0
0	0	0	0	0	0	0	0	0	0	0	0	0	0	0	0	0	0	0	0	0	0	0	0	0	0	0	0	0	0	0	0	0	0	0	0	0	0	0	0	0	0	0	0	0	0	0	0	0	0
0	0	0	0	0	0	0	0	0	0	0	0	0	0	0	0	0	0	0	0	0	0	0	0	0	0	0	0	0	0	0	0	0	0	0	0	0	0	0	0	0	0	0	0	0	0	0	0	0	0
0	0	0	0	0	0	0	0	0	0	0	0	0	0	0	0	0	0	0	0	0	0	0	0	0	0	0	0	0	0	0	0	0	0	0	0	0	0	0	0	0	0	0	0	0	0	0	0	0	0
0	0	0	0	0	0	0	0	0	0	0	0	0	0	0	0	0	0	0	0	0	0	0	0	0	0	0	0	0	0	0	0	0	0	0	0	0	0	0	0	0	0	0	0	0	0	0	0	0	0
0	0	0	0	0	0	0	0	0	0	0	0	0	0	0	0	0	0	0	0	0	0	0	0	0	0	0	0	0	0	0	0	0	0	0	0	0	0	0	0	0	0	0	0	0	0	0	0	0	0
0	0	0	0	0	0	0	0	0	0	0	0	0	0	0	0	0	0	0	0	0	0	0	0	0	0	0	0	0	0	0	0	0	0	0	0	0	0	0	0	0	0	0	0	0	0	0	0	0	0
0	0	0	0	0	0	0	0	0	0	0	0	0	0	0	0	0	0	0	0	0	0	0	0	0	0	0	0	0	0	0	0	0	0	0	0	0	0	0	0	0	0	0	0	0	0	0	0	0	0
0	0	0	0	0	0	0	0	0	0	0	0	0	0	0	0	0	0	0	0	0	0	0	0	0	0	0	0	0	0	0	0	0	0	0	0	0	0	0	0	0	0	0	0	0	0	0	0	0	0
0	0	0	0	0	0	0	0	0	0	0	0	0	0	0	0	0	0	0	0	0	0	0	0	0	0	0	0	0	0	0	0	0	0	0	0	0	0	0	0	0	0	0	0	0	0	0	0	0	0
0	0	0	0	0	0	0	0	0	0	0	0	0	0	0	0	0	0	0	0	0	0	0	0	0	0	0	0	0	0	0	0	0	0	0	0	0	0	0	0	0	0	0	0	0	0	0	0	0	0
0	0	0	0	0	0	0	0	0	0	0	0	0	0	0	0	0	0	0	0	0	0	0	0	0	0	0	0	0	0	0	0	0	0	0	0	0	0	0	0	0	0	0	0	0	0	0	0	0	0
0	0	0	0	0	0	0	0	0	0	0	0	0	0	0	0	0	0	0	0	0	0	0	0	0	0	0	0	0	0	0	0	0	0	0	0	0	0	0	0	0	0	0	0	0	0	0	0	0	0
0	0	0	0	0	0	0	0	0	0	0	0	0	0	0	0	0	0	0	0	0	0	0	0	0	0	0	0	0	0	0	0	0	0	0	0	0	0	0	0	0	0	0	0	0	0	0	0	0	0
0	0	0	0	0	0	0	0	0	0	0	0	0	0	0	0	0	0	0	0	0	0	0	0	0	0	0	0	0	0	0	0	0	0	0	0	0	0	0	0	0	0	0	0	0	0	0	0	0	0
0	0	0	0	0	0	0	0	0	0	0	0	0	0	0	0	0	0	0	0	0	0	0	0	0	0	0	0	0	0	0	0	0	0	0	0	0	0	0	0	0	0	0	0	0	0	0	0	0	0
0	0	0	0	0	0	0	0	0	0	0	0	0	0	0	0	0	0	0	0	0	0	0	0	0	0	0	0	0	0	0	0	0	0	0	0	0	0	0	0	0	0	0	0	0	0	0	0	0	0
0	0	0	0	0	0	0	0	0	0	0	0	0	0	0	0	0	0	0	0	0	0	0	0	0	0	0	0	0	0	0	0	0	0	0	0	0	0	0	0	0	0	0	0	0	0	0	0	0	0
0	0	0	0	0	0	0	0	0	0	0	0	0	0	0	0	0	0	0	0	0	0	0	0	0	0	0	0	0	0	0	0	0	0	0	0	0	0	0	0	0	0	0	0	0	0	0	0	0	0
0	0	0	0	0	0	0	0	0	0	0	0	0	0	0	0	0	0	0	0	0	0	0	0	0	0	0	0	0	0	0	0	0	0	0	0	0	0	0	0	0	0	0	0	0	0	0	0	0	0
0	0	0	0	0	0	0	0	0	0	0	0	0	0	0	0	0	0	0	0	0	0	0	0	0	0	0	0	0	0	0	0	0	0	0	0	0	0	0	0	0	0	0	0	0	0	0	0	0	0
0	0	0	0	0	0	0	0	0	0	0	0	0	0	0	0	0	0	0	0	0	0	0	0	0	0	0	0	0	0	0	0	0	0	0	0	0	0	0	0	0	0	0	0	0	0	0	0	0	0
0	0	0	0	0	0	0	0	0	0	0	0	0	0	0	0	0	0	0	0	0	0	0	0	0	0	0	0	0	0	0	0	0	0	0	0	0	0	0	0	0	0	0	0	0	0	0	0	0	0
0	0	0	0	0	0	0	0	0	0	0	0	0	0	0	0	0	0	0	0	0	0	0	0	0	0	0	0	0	0	0	0	0	0	0	0	0	0	0	0	0	0	0	0	0	0	0	0	0	0
0	0	0	0	0	0	0	0	0	0	0	0	0	0	0	0	0	0	0	0	0	0	0	0	0	0	0	0	0	0	0	0	0	0	0	0	0	0	0	0	0	0	0	0	0	0	0	0	0	0
0	0	0	0	0	0	0	0	0	0	0	0	0	0	0	0	0	0	0.0471103	0.0348113	0.0402814	0.0252926	0.0246433	0.0292758	0.0348085	0.0363447	0	0	0	0	0	0	0	0	0	0	0	0	0	0	0	0	0	0	0	0	0	0	0	0
0	0	0	0	0	0	0	0	0	0	0	0	0	0	0	0	0	0.0403807	0.0233055	0.0273519	0.023563	0.0219707	0.0374461	0.0309633	0.0321169	0.032149	0.0251466	0.0250733	0	0	0	0	0	0	0	0	0	0	0	0	0	0	0	0	0	0	0	0	0	0
0	0	0	0	0	0	0	0	0	0	0	0	0	0	0	0	0.042115	0.0376437	0.00807486	0.0226011	0.0276218	0.0249888	0.0366045	0.0395008	0.0471878	0.0507715	0.0634536	0.0535687	0.0454053	0.0315361	0.014329	0	0	0	0	0	0	0	0	0	0	0	0	0	0	0	0	0	0	0
0	0	0	0	0	0	0	0	0	0	0	0	0	0	0	0.0455781	0.0645651	0.036964	0.0261592	0.0223423	0.0217235	0.0202092	0.0173313	0.00840684	0.0191597	0.0167085	0.0237266	0.0665138	0.135439	0.196154	0.201476	0.137022	0.0402785	0	0	0	0	0	0	0	0	0	0	0	0	0	0	0	0	0
0	0	0	0	0	0	0	0	0	0	0	0	0	0	0.0421358	0.0366593	0.0248809	0.0245243	0.0268844	0.0327157	0.0213354	0.0157165	0.0209478	0.0202334	0.0221308	0.0176259	0.0260309	0.0139917	0.0178427	0.00615838	0.0275282	0.0138948	0.0113318	0.0111904	0.0154501	0	0	0	0	0	0	0	0	0	0	0	0	0	0	0
0	0	0	0	0	0	0	0	0	0	0	0	0	0.0362557	0.0420347	0.0311643	0.0258015	0.0140794	0.0211416	0.0211159	0.0180304	0.0216588	0.0191727	0.0331552	0.0272123	0.0307323	0.0162637	0.0296883	0.0145763	0.0166131	0.0232196	0.0246939	0.000983375	0.0147603	0.0156893	0.0068931	0.00971701	0.0199454	0.00993309	0.0139861	0.0129549	-0.0167093	0	0	0	0	0	0	0	0
0	0	0	0	0	0	0	0	0	0	0	0	0	0.0373994	0.0517901	0.0444926	0.0315012	0.0317938	0.0138125	0.0220372	0.0231489	0.0202729	0.022358	0.0335442	0.025756	0.0302541	0.0167073	0.0280268	0.0252103	0.0119501	0.0241722	0.0258083	0.0173204	0.0237867	0.0206005	0.0176237	0.0251361	0.0127148	0.00579102	0.0142606	0.0152999	0.00970246	-0.0109223	0	0	0	0	0	0	0
0	0	0	0	0	0	0	0	0	0	0	0	0	0.0319902	0.040383	0.0381109	0.0245713	0.0268486	0.0145053	0.00925905	0.0174637	0.0161104	0.0134867	0.0255553	0.0217663	0.0273119	0.0166083	0.0199769	0.0245357	0.0139217	0.0129674	0.0115061	0.000832263	0.0264035	0.016803	0.00638821	0.014559	0.0145263	0.00971125	0.0164355	0.0122375	0.0117764	-0.00622672	0	0	0	0	0	0	0
0	0	0	0	0	0	0	0	0	0	0	0	0	0.028793	0.0382693	0.0397836	0.0278622	0.0243625	0.0183266	0.0213623	0.0139033	0.0148488	0.0129293	0.0235451	0.012547	0.0213435	0.0172154	0.0154242	0.0311998	0.00541246	0.0226823	0.0213747	0.00897335	0.0241755	0.01438	0.0237298	0.0140871	0.0153651	0.02183	0.0179545	0.0114449	0.000947737	-0.0110686	-0.0148953	0	0	0	0	0	0
0	0	0	0	0	0	0	0	0	0	0	0	0	0.0457692	0.0322832	0.0436298	0.0231247	0.0156497	0.0238086	0.0109252	0.0213027	0.0225581	0.0116296	0.0167201	0.0128458	0.0184516	0.0153122	0.0243718	0.0193974	0.0161982	0.0244227	0.0246226	0.000765701	0.0161212	0.0274011	0.0200636	0.0331758	0.026864	0.022988	0.0195527	0.00597331	0.0156249	7.78183e-05	0.00271144	-0.0146653	0.0107251	0.00883199	0.00107467	0.000321777	0.00102879
0	0	0	0	0	0	0	0	0	0	0	0	0	0.024884	0.0319235	0.0218334	0.0184226	0.020848	0.0128723	0.016495	0.0144649	0.0147295	0.0194616	0.021296	0.0211204	0.0154754	0.0260159	0.0225538	0.0353333	0.0164856	0.0268714	0.0279296	0.00819824	0.0279045	0.0307036	0.0138054	0.0303761	0.0265758	0.0289551	0.0483805	0.00218702	0.0376162	0.0268291	0.0400849	0.0257746	0	0	0	0	0
0	0	0	0	0	0	0	0	0	0	0	0	0	0.0291546	0.0334627	0.0151359	0.0211387	0.0128799	0.0057065	0.0145864	0.0219234	0.0202853	0.0184951	0.0183496	0.0149764	0.0191172	0.0167984	0.0281371	0.0266125	0.00954466	0.0254088	0.04046	0.0191582	0.0198096	0.0125824	0.00540083	0.0250798	0.0311507	0.0425781	0.0478551	0.0391974	0.0468878	0.0445747	0.0276456	0	0	0	0	0	0
0	0	0	0	0	0	0	0	0	0	0	0	0	0.0333403	0.0277746	0.0307177	0.0133445	0.0151138	0.00676708	0.00746772	0.0204579	-0.00390077	0.0113993	0.0242439	0.0114787	0.0188938	0.0179657	0.0252565	0.0224406	0.0134196	0.0280689	0.0211489	0.0205726	0.0256693	0.00685567	0.0116893	0.0345404	0.0293222	0.0182426	0.0288869	0.0498693	0.0581678	0.0591485	0.0422478	0	0	0	0	0	0
0	0	0	0	0	0	0	0	0	0	0	0	0	0	0.045617	0.0297473	0.0263035	0.0195139	0.0105258	0.00578569	0.0152287	0.008492	0.0163555	0.0342668	0.0186682	0.0155574	0.0255384	0.0224054	0.0270854	0.0200855	0.0249632	0.0333849	0.0384667	0.0347058	0.0305048	0.0254031	0.0282984	0.0233334	0.0535463	0.0424452	0.0708639	0.0759379	0.041702	0.0158611	0	0	0	0	0	0
0	0	0	0	0	0	0	0	0	0	0	0	0	0	0	0.0436425	0.0275666	0.0216612	0.0171035	0.0213691	0.018673	0.015801	0.0192306	0.0259758	0.0312268	0.0204403	6.28807e-05	0.0171932	0.0319708	0.0130274	0.0343458	0.0392987	0.0253282	0.0304864	0.0107209	0.0005069	0.0170622	0.0416603	0.0584925	0.0526922	0.0442798	0.0419051	0.0525786	0.035828	0	0	0	0	0	0
0	0	0	0	0	0	0	0	0	0	0	0	0	0	0	0	0	0.0202824	0.0253341	0.0103488	0.0151602	0.010738	0.010744	0.0241978	0.0184078	-0.00134971	-2.19591e-05	0.0220618	0.00680968	0.00591429	0.0203601	0.021919	0.0159613	0.0198281	0.0204036	0.00797129	0.0106458	0.0293339	0.0546506	0.0292677	0.0224717	0.0504618	0	0	0	0	0	0	0	0
0	0	0	0	0	0	0	0	0	0	0	0	0	0	0	0	0	0	0	0	0.0418915	0.030613	0.0274451	0.0356995	0.0220628	0.026018	0.00693945	0.0203039	0.020935	0.00076635	0.0227897	0.0414456	0.0334575	0.0301791	0.0116235	0.0327014	0.0169972	0.0207106	0	0	0	0	0	0	0	0	0	0	0	0
0	0	0	0	0	0	0	0	0	0	0	0	0	0	0	0	0	0	0	0	0	0	0	0	0	0	0	0	0	0	0	0	0	0	0	0	0	0	0	0	0	0	0	0	0	0	0	0	0	0
0	0	0	0	0	0	0	0	0	0	0	0	0	0	0	0	0	0	0	0	0	0	0	0	0	0	0	0	0	0	0	0	0	0	0	0	0	0	0	0	0	0	0	0	0	0	0	0	0	0
0	0	0	0	0	0	0	0	0	0	0	0	0	0	0	0	0	0	0	0	0	0	0	0	0	0	0	0	0	0	0	0	0	0	0	0	0	0	0	0	0	0	0	0	0	0	0	0	0	0
0	0	0	0	0	0	0	0	0	0	0	0	0	0	0	0	0	0	0	0	0	0	0	0	0	0	0	0	0	0	0	0	0	0	0	0	0	0	0	0	0	0	0	0	0	0	0	0	0	0
0	0	0	0	0	0	0	0	0	0	0	0	0	0	0	0	0	0	0	0	0	0	0	0	0	0	0	0	0	0	0	0	0	0	0	0	0	0	0	0	0	0	0	0	0	0	0	0	0	0
0	0	0	0	0	0	0	0	0	0	0	0	0	0	0	0	0	0	0	0	0	0	0	0	0	0	0	0	0	0	0	0	0	0	0	0	0	0	0	0	0	0	0	0	0	0	0	0	0	0
0	0	0	0	0	0	0	0	0	0	0	0	0	0	0	0	0	0	0	0	0	0	0	0	0	0	0	0	0	0	0	0	0	0	0	0	0	0	0	0	0	0	0	0	0	0	0	0	0	0
0	0	0	0	0	0	0	0	0	0	0	0	0	0	0	0	0	0	0	0	0	0	0	0	0	0	0	0	0	0	0	0	0	0	0	0	0	0	0	0	0	0	0	0	0	0	0	0	0	0
0	0	0	0	0	0	0	0	0	0	0	0	0	0	0	0	0	0	0	0	0	0	0	0	0	0	0	0	0	0	0	0	0	0	0	0	0	0	0	0	0	0	0	0	0	0	0	0	0	0
0	0	0	0	0	0	0	0	0	0	0	0	0	0	0	0	0	0	0	0	0	0	0	0	0	0	0	0	0	0	0	0	0	0	0	0	0	0	0	0	0	0	0	0	0	0	0	0	0	0
0	0	0	0	0	0	0	0	0	0	0	0	0	0	0	0	0	0	0	0	0	0	0	0	0	0	0	0	0	0	0	0	0	0	0	0	0	0	0	0	0	0	0	0	0	0	0	0	0	0
0	0	0	0	0	0	0	0	0	0	0	0	0	0	0	0	0	0	0	0	0	0	0	0	0	0	0	0	0	0	0	0	0	0	0	0	0	0	0	0	0	0	0	0	0	0	0	0	0	0
0	0	0	0	0	0	0	0	0	0	0	0	0	0	0	0	0	0	0	0	0	0	0	0	0	0	0	0	0	0	0	0	0	0	0	0	0	0	0	0	0	0	0	0	0	0	0	0	0	0
0	0	0	0	0	0	0	0	0	0	0	0	0	0	0	0	0	0	0	0	0	0	0	0	0	0	0	0	0	0	0	0	0	0	0	0	0	0	0	0	0	0	0	0	0	0	0	0	0	0
0	0	0	0	0	0	0	0	0	0	0	0	0	0	0	0	0	0	0	0	0	0	0	0	0	0	0	0	0	0	0	0	0	0	0	0	0	0	0	0	0	0	0	0	0	0	0	0	0	0
0	0	0	0	0	0	0	0	0	0	0	0	0	0	0	0	0	0	0	0	0	0	0	0	0	0	0	0	0	0	0	0	0	0	0	0	0	0	0	0	0	0	0	0	0	0	0	0	0	0
0	0	0	0	0	0	0	0	0	0	0	0	0	0	0	0	0	0	0	0	0	0	0	0	0	0	0	0	0	0	0	0	0	0	0	0	0	0	0	0	0	0	0	0	0	0	0	0	0	0
0	0	0	0	0	0	0	0	0	0	0	0	0	0	0	0	0	0	0	0	0	0	0	0	0	0	0	0	0	0	0	0	0	0	0	0	0	0	0	0	0	0	0	0	0	0	0	0	0	0
0	0	0	0	0	0	0	0	0	0	0	0	0	0	0	0	0	0	0	0	0	0	0	0	0	0	0	0	0	0	0	0	0	0	0	0	0	0	0	0	0	0	0	0	0	0	0	0	0	0
0	0	0	0	0	0	0	0	0	0	0	0	0	0	0	0	0	0	0	0	0	0	0	0	0	0	0	0	0	0	0	0	0	0	0	0	0	0	0	0	0	0	0	0	0	0	0	0	0	0
0	0	0	0	0	0	0	0	0	0	0	0	0	0	0	0	0	0	0	0	0	0	0	0	0	0	0	0	0	0	0	0	0	0	0	0	0.0969709	0.0811884	0	0	0	0	0	0	0	0	0	0	0	0
0	0	0	0	0	0	0	0	0	0	0	0	0	0	0	0	0	0	0	0	0	0	0	0	0	0	0	0	0	0	0	0	0	0	0	0.0850315	0.109565	0.0929375	0.106731	0.0271073	0	0	0	0	0	0	0	0	0	0
0	0	0	0	0	0	0	0	0	0	0	0	0	0	0	0	0	0	0	0	0	0	0	0	0	0	0	0	0	0	0	0	0	0	0.0760206	0.0708104	0.0993109	0.0894447	0.0875504	0.0552392	0.00815871	0	0	0	0	0	0	0	0	0
0	0	0	0	0	0	0	0	0	0	0	0	0	0	0	0	0	0	0	0	0	0	0	0	0	0	0	0	0	0	0	0	0	0.0841568	0.082071	0.0721702	0.0763861	0.0907118	0.0656669	0.0484546	0.0322191	0.0580131	0.0345237	0.0231212	0	0	0	0	0	0
0	0	0	0	0	0	0	0	0	0	0	0	0	0	0	0	0	0	0	0	0	0	0	0	0	0	0	0	0	0	0	0.0652203	0.0398538	0.0682355	0.0448857	0.0532513	0.0567431	0.0766387	0.0736536	0.0514246	0.0352487	0.0506407	0.0416326	0.0166881	0.00657794	0.0137389	0	0	0	0
0	0	0	0	0	0	0	0	0	0	0	0	0	0	0	0	0	0	0	0	0	0	0	0	0	0	0	0	0	0	0.0480774	0.0578463	0.0415319	0.036139	0.0402019	0.0482463	0.035314	0.0475565	0.0523517	0.0313517	0.029589	0.0486353	0.028791	-0.010055	0.00305282	0.00668557	0.00359224	0	0	0
0	0	0	0	0	0	0	0	0	0	0	0	0	0	0	0	0	0	0	0	0	0	0	0	0	0	0	0	0	0.0353432	0.0273113	0.0262099	0.0481878	0.0531834	0.0506371	0.0444233	0.0515343	0.0402107	0.0438876	0.0200391	0.00934449	0.0153949	0.0119048	-0.0122711	-0.000288953	0.0146441	0.00593018	0.00431069	0	0
0	0	0	0	0	0	0	0	0	0	0	0	0	0	0	0	0	0	0	0	0	0	0	0	0	0	0	0	0	0.0126619	0.0378575	0.0206632	0.0404394	0.0484638	0.0295217	0.0316235	0.0408341	0.036359	0.0238633	0.0292042	0.0191931	0.0240632	-0.0118299	-0.0116498	0.00922672	0.00703043	0.00220419	0.00731159	0	0
0	0	0	0	0	0	0	0	0	0	0	0	0	0	0	0	0	0	0	0	0	0	0	0	0	0	0	0	0.0188469	0.00792012	0.024556	0.0279183	0.0466632	0.0341507	0.0502797	0.0392842	0.0453195	0.0217194	0.013818	0.00880407	0.0176708	0.0229863	-0.00880875	-0.00743068	0.00601586	0.00519032	0.000781265	0.00485233	0	0
0	0	0	0	0	0	0	0	0	0	0	0	0	0	0	0	0	0	0	0	0	0	0	0	0	0	0	0.0180363	0.0219854	0.00908595	0.0160417	0.0342092	0.0378043	0.0506622	0.0348201	0.030926	0.0423621	0.021442	0.0187534	0.0127089	0.0272387	0.0201745	-0.00247005	-0.00566986	0.00546201	0.00565582	0.00428022	0.0030084	0	0
0	0	0	0	0	0	0	0	0	0	0	0	0	0	0	0	0	0	0	0	0	0	0	0	0	0	0.0216527	0.0223839	0.0336155	0.0080852	0.0189289	0.0320256	0.0159369	0.0377427	0.0496135	0.0181371	0.0133981	0.0155173	-0.00427054	0.0149364	0.0250477	0.024594	-0.00577237	-0.000527385	-0.0052855	0.00209235	0.00915777	0.000648243	0	0
0	0	0	0	0	0	0	0	0	0	0	0	0	0	0	0	0	0	0	0	0	0	0	0	0	0	0.0282791	0.0225268	0.0219782	0.00305709	0.0195585	0.0238536	0.0250326	0.021958	0.0272142	0.0191592	0.0161467	0.0145447	0.00860331	0.010208	0.0115412	0.0108432	0.00114594	0.00399647	0.013614	0.00414191	0.00739657	0.00296606	0	0
0	0	0	0	0	0	0	0	0	0	0	0	0	0	0	0	0	0	0	0	0	0	0	0	0	0.0271743	0.0166386	0.0333726	0.0277597	-0.00138316	0.0152769	0.040079	0.02751	0.0308684	0.0327462	0.0281687	0.0108107	0.0224846	0.0208683	0.0156147	0.021651	0.0156381	-0.00171517	0.0125466	0.0220082	0.0182521	0.00902975	0.00666587	0	0
0	0	0	0	0	0	0	0	0	0	0	0	0	0	0	0	0	0	0	0	0	0	0	0	0	0.0184763	0.000710533	0.00940539	0.0244968	-0.002297	0.0186821	0.0279923	0.00980742	0.0251286	0.0307431	0.0185559	0.0216854	0.0122949	0.0120148	0.017506	0.0143735	0.00781868	0.0104734	0.0146909	0.00469325	0.0149365	0.0141296	0.0103821	0	0
0	0	0	0	0	0	0	0	0	0	0	0	0	0	0	0	0	0	0	0	0	0	0	0	0	0.0267167	0.00752163	0.0182639	0.0153835	0.00214707	0.0115254	0.0209974	0.00970602	0.0304246	0.0262543	0.00517001	0.00432473	0.0134067	0.00759565	0.0149113	0.0154839	0.0184127	0.00266832	0.00936039	0.0122293	0.0111584	-0.0052776	0.00650571	0	0
0	0	0	0	0	0	0	0	0	0	0	0	0	0	0	0	0	0	0	0	0	0	0	0	0	0.0163644	0.00307191	0.0174614	0.0220958	0.0181628	0.0200868	0.0305722	0.0218479	0.0279485	0.025971	0.00801738	0.0259757	0.0206141	0.0198408	0.0121307	0.0176168	0.00941804	0.0199905	0.0155455	0.00184509	0.0127259	0.0187997	0.016652	0	0
0	0	0	0	0	0	0	0	0	0	0	0	0	0	0	0	0	0	0	0	0	0	0	0	0.0277777	0.0256346	0.0242848	0.0235368	0.0278535	0.0249996	0.0217587	0.024215	0.0185692	0.0318615	0.0320128	0.0204172	0.0233202	0.0173352	0.0255096	0.0217315	0.0113343	0.00726947	0.00480282	0.0131504	0.0137289	0.022507	0.0211086	0.0281719	0	0
0	0	0	0	0	0	0	0	0	0	0	0	0	0	0	0	0	0	0	0	0	0	0	0	0.0216864	0.0201208	0.0156989	0.0269151	0.0168552	0.0172539	0.030681	0.02862	0.0164333	0.0320792	0.0214855	0.0105952	0.0289124	0.0297739	0.0260667	0.0227859	0.0154115	0.0207031	0.0243675	0.0202249	0.0207734	0.0113943	0.0160333	0	0	0
0	0	0	0	0	0	0	0	0	0	0	0	0	0	0	0	0	0	0	0	0	0	0	0	0.0343952	0.0243387	0.0227239	0.0338562	0.0289149	0.0222743	0.0246111	0.0379353	0.0192082	0.0320478	0.0320064	0.0309218	0.0339411	0.0235885	0.0254602	0.0397164	0.0257891	0.0138066	0.0260413	0.0221686	0.0165565	0.0217962	0.0198445	0	0	0
0	0	0	0	0	0	0	0	0	0	0	0	0	0	0	0	0	0	0	0	0	0	0	0	0	0.0225801	0.0135787	0.0270827	0.0282093	0.0193964	0.0434397	0.0424715	0.0215331	0.0297421	0.0321053	0.0247859	0.0371625	0.0382793	0.032666	0.0323665	0.0299521	0.00589897	0.0132532	0.0260559	0.0199561	0.0191264	0	0	0	0
0	0	0	0	0	0	0	0	0	0	0	0	0	0	0	0	0	0	0	0	0	0	0	0	0	0.0400681	0.033744	0.0346258	0.0343582	0.0274645	0.0394876	0.0428972	0.0346557	0.0419973	0.0399959	0.040148	0.0435638	0.0393181	0.0354033	0.0363707	0.0407987	0.0192989	0.0186462	0.0423738	0.0188074	0.0272022	0	0	0	0
0	0	0	0	0	0	0	0	0	0	0	0	0	0	0	0	0	0	0	0	0	0	0	0	0	0	0	0.0310447	0.0400886	0.035212	0.039686	0.0404224	0.0247746	0.0499217	0.0439955	0.0387117	0.046679	0.052745	0.0470405	0.0382755	0.0344773	0.0256889	0.0125876	0.0263825	0.0247307	0	0	0	0	0
0	0	0	0	0	0	0	0	0	0	0	0	0	0	0	0	0	0	0	0	0	0	0	0	0	0	0	0	0	0.0251939	0.0430569	0.0529244	0.0349194	0.0514438	0.058582	0.0467971	0.0492697	0.0395359	0.0211691	0.0217862	0.0234294	0.0176679	0	0	0	0	0	0	0	0
0	0	0	0	0	0	0	0	0	0	0	0	0	0	0	0	0	0	0	0	0	0	0	0	0	0	0	0	0	0	0	0.038389	0.0182081	0.0517699	0.0466542	0.0350914	0.0344813	0.0340737	0.0290242	0	0	0	0	0	0	0	0	0	0	0
0	0	0	0	0	0	0	0	0	0	0	0	0	0	0	0	0	0	0	0	0	0	0	0	0	0	0	0	0	0	0	0	0	0	0	0	0	0	0	0	0	0	0	0	0	0	0	0	0	0
0	0	0	0	0	0	0	0	0	0	0	0	0	0	0	0	0	0	0	0	0	0	0	0	0	0	0	0	0	0	0	0	0	0	0	0	0	0	0	0	0	0	0	0	0	0	0	0	0	0
0	0	0	0	0	0	0	0	0	0	0	0	0	0	0	0	0	0	0	0	0	0	0	0	0	0	0	0	0	0	0	0	0	0	0	0	0	0	0	0	0	0	0	0	0	0	0	0	0	0
0	0	0	0	0	0	0	0	0	0	0	0	0	0	0	0	0	0	0	0	0	0	0	0	0	0	0	0	0	0	0	0	0	0	0	0	0	0	0	0	0	0	0	0	0	0	0	0	0	0
0	0	0	0	0	0	0	0	0	0	0	0	0	0	0	0	0	0	0	0	0	0	0	0	0	0	0	0	0	0	0	0	0	0	0	0	0	0	0	0	0	0	0	0	0	0	0	0	0	0
0	0	0	0	0	0	0	0	0	0	0	0	0	0	0	0	0	0	0	0	0	0	0	0	0	0	0	0	0	0	0	0	0	0	0	0	0	0	0	0	0	0	0	0	0	0	0	0	0	0
0	0	0	0	0	0	0	0	0	0	0	0	0	0	0	0	0	0	0	0	0	0	0	0	0	0	0	0	0	0	0	0	0	0	0	0	0	0	0	0	0	0	0	0	0	0	0	0	0	0
0	0	0	0	0	0	0	0	0	0	0	0	0	0	0	0	0	0	0	0	0	0	0	0	0	0	0	0	0	0	0	0	0	0	0	0	0	0	0	0	0	0	0	0	0	0	0	0	0	0
0	0	0	0	0	0	0	0	0	0	0	0	0	0	0	0	0	0	0	0	0	0	0	0	0	0	0	0	0	0	0	0	0	0	0	0	0	0	0	0	0	0	0	0	0	0	0	0	0	0
0	0	0	0	0	0	0	0	0	0	0	0	0	0	0	0	0	0	0	0	0	0	0	0	0	0	0	0	0	0	0	0	0	0	0	0	0	0	0	0	0	0	0	0	0	0	0	0	0	0
0	0	0	0	0	0	0	0	0	0	0	0	0	0	0	0	0	0	0	0	0	0	0	0	0	0	0	0	0	0	0	0	0	0	0	0	0	0	0	0	0	0	0	0	0	0	0	0	0	0
0	0	0	0	0	0	0	0	0	0	0	0	0	0	0	0	0	0	0	0	0	0	0	0	0	0	0	0	0	0	0	0	0	0	0	0	0	0	0	0	0	0	0	0	0	0	0	0	0	0
0	0	0	0	0	0	0	0	0	0	0	0	0	0	0	0	0	0	0	0	0	0	0	0	0	0	0	0	0	0	0	0	0	0	0	0	0	0	0	0	0	0	0	0	0	0	0	0	0	0
0	0	0	0	0	0	0	0	0	0	0	0	0	0	0	0	0	0	0	0	0	0	0	0	0	0	0	0	0	0	0	0	0	0	0	0	0	0	0	0	0	0	0	0	0	0	0	0	0	0
0	0	0	0	0	0	0	0	0	0	0	0	0	0	0	0	0	0	0	0	0	0	0	0	0	0	0	0	0	0	0	0	0	0	0	0	0	0	0	0	0	0	0	0	0	0	0	0	0	0
0	0	0	0	0	0	0	0	0	0	0	0	0	0	0	0	0	0	0	0	0	0	0	0	0	0	0	0	0	0	0	0	0	0	0	0	0	0	0	0	0	0	0	0	0	0	0	0	0	0
0	0	0	0	0	0	0	0	0	0	0	0	0	0	0	0	0	0	0	0	0	0	0	0	0	0	0	0	0	0	0	0	0	0	0	0	0	0	0	0	0	0	0	0	0	0	0	0	0	0
0	0	0	0	0	0	0	0	0	0	0	0	0	0	0	0	0	0	0	0	0	0	0	0	0	0	0	0	0	0	0	0	0	0	0	0	0	0	0	0	0	0	0	0	0	0	0	0	0	0
0	0	0	0	0	0	0	0	0	0	0	0	0	0	0	0	0	0	0	0	0	0	0	0	0	0	0	0	0	0	0	0	0	0	0	0	0	0	0	0	0	0	0	0	0	0	0	0	0	0
0	0	0	0	0	0	0	0	0	0	0	0	0	0	0	0	0	0	0	0	0	0	0	0	0	0	0	0	0	0	0	0	0	0	0	0	0	0	0	0	0	0	0	0	0	0	0	0	0	0
0	0	0	0	0	0	0	0	0	0	0	0	0	0	0	0	0	0	0	0	0	0	0	0	0	0	0	0	0	0	0	0	0	0	0	0	0	0	0	0	0	0	0	0	0	0	0	0	0	0
0	0	0	0	0	0	0	0	0	0	0	0	0	0	0	0	0	0	0	0	0	0	0	0	0	0	0	0	0	0	0	0	0	0	0	0	0	0	0	0	0	0	0	0	0	0	0	0	0	0
0	0	0	0	0	0	0	0	0	0	0	0	0	0	0	0	0	0	0	0	0	0	0	0	0	0	0	0.0317172	0.0177494	-0.0068134	0.0189657	0.0169846	0.0138909	0.0424074	0	0	0	0	0	0	0	0	0	0	0	0	0	0	0	0
0	0	0	0	0	0	0	0	0	0	0	0	0	0	0	0	0	0	0	0	0	0	0	-0.0647748	-0.229219	-0.144198	0.00444281	0.0648146	0.0164565	-0.018676	0.028356	0.016126	0.0386653	0.128451	0.138412	-0.057244	-0.157852	0	0	0	0	0	0	0	0	0	0	0	0	0
0	0	0	0	0	0	0	0	0	0	0	0	0	0	0	0	0	0	0	0	0	0.0204982	0.024719	0.0117026	-0.0116713	-0.0260971	-0.0438773	-0.0462143	-0.0245702	-0.0436286	-0.0304407	0.00123689	0.0159423	0.046758	0.0481918	0.0405633	0.0295212	-0.0278166	0.0284555	0	0	0	0	0	0	0	0	0	0	0
0	0	0	0	0	0	0	0	0	0	0	0	0	0	0	0	0	0.0244371	0.0169616	0.0202537	0.021416	0.014245	0.0273629	-0.000880556	-0.0355981	-0.0354398	-0.0550999	-0.0459387	-0.0198374	-0.0301896	-0.013958	0.00221967	0.0212914	0.0339665	0.0428053	0.044481	0.0376209	-0.0413026	0	0	0	0	0	0	0	0	0	0	0	0
0	0	0	0	0	0	0	0	0	0	0	0	0	0	0	0	0	0.0225393	0.0246312	0.0139368	0.0223648	0.0289967	0.0285913	-0.0126529	-0.0250232	-0.0469351	-0.0567742	-0.0368515	-0.011226	-0.00252263	-0.0183155	-0.0108097	0.0570271	0.030576	0.0258082	0.0478395	0.0158205	-0.0393223	0	0	0	0	0	0	0	0	0	0	0	0
0	0	0	0	0	0	0	0	0	0	0	0	0	0	0	0	0.0304502	0.00957488	0.0128819	0.0130078	0.0164732	0.0152669	0.0239202	0.0014581	-0.0202995	-0.0475755	-0.0606479	-0.0153981	-0.0193626	-0.0272963	-0.0127807	-0.015672	0.0297175	0.010508	-0.0200466	0.0120285	0.00896313	-0.0515006	0	0	0	0	0	0	0	0	0	0	0	0
0	0	0	0	0	0	0	0	0	0	0	0	0	0	0	0	0.0280891	0.0279832	0.0185225	0.0155601	0.0275205	0.0220699	0.0105544	0.00130941	-0.0320321	-0.050228	-0.0341398	-0.0195071	-0.0461048	-0.0161032	-0.00704064	0.00324319	-0.0055993	-0.0151829	0.00172573	0.00184254	-0.0226259	-0.029656	0	0	0	0	0	0	0	0	0	0	0	0
0	0	0	0	0	0	0	0	0	0	0	0	0	0	0	0	0.0252364	0.0320536	0.0229471	0.0222538	0.0165552	0.0121474	0.012777	-0.0250101	-0.0437689	-0.0376767	-0.0520216	-0.0631831	-0.0332348	-0.00572802	-0.034055	0.0177156	-0.0122789	-0.0276522	-0.0173053	0.0011566	-0.04233	-0.0155459	0	0	0	0	0	0	0	0	0	0	0	0
0	0	0	0	0	0	0	0	0	0	0	0	0	0	0	0	0.0217604	0.0134269	0.0190211	0.00395502	0.00761414	0.0072505	-0.00590572	-0.0492931	-0.0467755	-0.0526164	-0.0618768	-0.0350593	-0.0220024	-0.0557916	-0.0306798	-0.00266082	-0.0371868	-0.037343	-0.028351	-0.019395	-0.0328799	0.0125592	0	0	0	0	0	0	0	0	0	0	0	0
0	0	0	0	0	0	0	0	0	0	0	0	0	0	0	0.0377475	0.0280388	0.0194939	0.0214918	0.0156175	0.014228	0.0126889	-0.00763092	-0.0474101	-0.0420593	-0.0634285	-0.0486894	-0.0336582	-0.0494132	-0.0528431	-0.0205352	0.0111009	-0.0410003	-0.0437473	-0.00874083	-0.018113	-0.00583917	0	0	0	0	0	0	0	0	0	0	0	0	0
0	0	0	0	0	0	0	0	0	0	0	0	0	0	0	0.0532765	0.0307562	0.0282222	0.00715511	0.017365	0.0159578	0.00494025	-0.025478	-0.0486188	-0.0606816	-0.070029	-0.0484921	-0.0322563	-0.027898	-0.0385621	-0.0241374	0.000734647	-0.0408808	-0.0323623	-0.0161909	-0.00872636	0	0	0	0	0	0	0	0	0	0	0	0	0	0
0	0	0	0	0	0	0	0	0	0	0	0	0	0	0	0	0.0306518	0.0220178	0.0108099	0.01823	0.0222857	0.0131982	0.000681186	-0.0542942	-0.0481434	-0.0429916	-0.0610308	-0.0348624	-0.0395715	-0.0374043	-0.00189563	-0.0282929	-0.0517116	-0.0346132	-0.00567225	0	0	0	0	0	0	0	0	0	0	0	0	0	0	0
0	0	0	0	0	0	0	0	0	0	0	0	0	0	0	0	0	0.029427	0.0149152	0.0170424	0.01169	0.0209823	0.0211308	0.0137572	0.00482405	-0.0171949	-0.0141135	-0.0240396	-0.0149113	-0.0152756	-0.0145054	-0.00020258	-0.00053045	0.0119312	0	0	0	0	0	0	0	0	0	0	0	0	0	0	0	0
0	0	0	0	0	0	0	0	0	0	0	0	0	0	0	0	0	0	0.0390431	0.0280999	0.0178902	0.0160458	0.0143934	0.0279187	0.0129396	0.0111555	1.97944e-05	0.00927116	0.0170594	-0.000108438	0.0104059	0.0132757	0.0124999	0	0	0	0	0	0	0	0	0	0	0	0	0	0	0	0	0
0	0	0	0	0	0	0	0	0	0	0	0	0	0	0	0	0	0	0	0.0288483	0.0307075	0.0201294	0.0247956	0.03706	0.0289568	0.019473	0.0136731	0.0269228	0.0249231	0.00861579	0.00857944	0.0135182	0	0	0	0	0	0	0	0	0	0	0	0	0	0	0	0	0	0
0	0	0	0	0	0	0	0	0	0	0	0	0	0	0	0	0	0	0	0	0.029004	0.029141	0.0311357	0.0281713	0.0329208	0.0236357	0.0235646	0.0268143	0.0318222	0.00963829	0.00882997	0	0	0	0	0	0	0	0	0	0	0	0	0	0	0	0	0	0	0
0	0	0	0	0	0	0	0	0	0	0	0	0	0	0	0	0	0	0	0	0	0	0	0.035437	0.0258661	0.0217891	0.0159516	0.0310477	0.0165279	0	0	0	0	0	0	0	0	0	0	0	0	0	0	0	0	0	0	0	0	0
0	0	0	0	0	0	0	0	0	0	0	0	0	0	0	0	0	0	0	0	0	0	0	0	0	0	0	0	0	0	0	0	0	0	0	0	0	0	0	0	0	0	0	0	0	0	0	0	0	0
0	0	0	0	0	0	0	0	0	0	0	0	0	0	0	0	0	0	0	0	0	0	0	0	0	0	0	0	0	0	0	0	0	0	0	0	0	0	0	0	0	0	0	0	0	0	0	0	0	0
0	0	0	0	0	0	0	0	0	0	0	0	0	0	0	0	0	0	0	0	0	0	0	0	0	0	0	0	0	0	0	0	0	0	0	0	0	0	0	0	0	0	0	0	0	0	0	0	0	0
0	0	0	0	0	0	0	0	0	0	0	0	0	0	0	0	0	0	0	0	0	0	0	0	0	0	0	0	0	0	0	0	0	0	0	0	0	0	0	0	0	0	0	0	0	0	0	0	0	0
0	0	0	0	0	0	0	0	0	0	0	0	0	0	0	0	0	0	0	0	0	0	0	0	0	0	0	0	0	0	0	0	0	0	0	0	0	0	0	0	0	0	0	0	0	0	0	0	0	0
0	0	0	0	0	0	0	0	0	0	0	0	0	0	0	0	0	0	0	0	0	0	0	0	0	0	0	0	0	0	0	0	0	0	0	0	0	0	0	0	0	0	0	0	0	0	0	0	0	0
0	0	0	0	0	0	0	0	0	0	0	0	0	0	0	0	0	0	0	0	0	0	0	0	0	0	0	0	0	0	0	0	0	0	0	0	0	0	0	0	0	0	0	0	0	0	0	0	0	0
0	0	0	0	0	0	0	0	0	0	0	0	0	0	0	0	0	0	0	0	0	0	0	0	0	0	0	0	0	0	0	0	0	0	0	0	0	0	0	0	0	0	0	0	0	0	0	0	0	0
0	0	0	0	0	0	0	0	0	0	0	0	0	0	0	0	0	0	0	0	0	0	0	0	0	0	0	0	0	0	0	0	0	0	0	0	0	0	0	0	0	0	0	0	0	0	0	0	0	0
0	0	0	0	0	0	0	0	0	0	0	0	0	0	0	0	0	0	0	0	0	0	0	0	0	0	0	0	0	0	0	0	0	0	0	0	0	0	0	0	0	0	0	0	0	0	0	0	0	0
0	0	0	0	0	0	0	0	0	0	0	0	0	0	0	0	0	0	0	0	0	0	0	0	0	0	0	0	0	0	0	0	0	0	0	0	0	0	0	0	0	0	0	0	0	0	0	0	0	0
0	0	0	0	0	0	0	0	0	0	0	0	0	0	0	0	0	0	0	0	0	0	0	0	0	0	0	0	0	0	0	0	0	0	0	0	0	0	0	0	0	0	0	0	0	0	0	0	0	0
0	0	0	0	0	0	0	0	0	0	0	0	0	0	0	0	0	0	0	0	0	0	0	0	0	0	0	0	0	0	0	0	0	0	0	0	0	0	0	0	0	0	0	0	0	0	0	0	0	0
0	0	0	0	0	0	0	0	0	0	0	0	0	0	0	0	0	0	0	0	0	0	0	0	0	0	0	0	0	0	0	0	0	0	0	0	0	0	0	0	0	0	0	0	0	0	0	0	0	0
0	0	0	0	0	0	0	0	0	0	0	0	0	0	0	0	0	0	0	0	0	0	0	0	0	0	0	0	0	0	0	0	0	0	0	0	0	0	0	0	0	0	0	0	0	0	0	0	0	0
0	0	0	0	0	0	0	0	0	0	0	0	0	0	0	0	0	0	0	0	0	0	0	0	0	0	0	0	0	0	0	0	0	0	0	0	0	0	0	0	0	0	0	0	0	0	0	0	0	0
0	0	0	0	0	0	0	0	0	0	0	0	0	0	0	0	0	0	0	0	0	0	0	0	0	0	0	0	0	0	0	0	0	0	0	0	0	0	0	0	0	0	0	0	0	0	0	0	0	0
0	0	0	0	0	0	0	0	0	0	0	0	0	0	0	0	0	0	0	0	0	0	0	0	0	0	0	0	0	0	0	0	0	0	0	0	0	0	0	0	0	0	0	0	0	0	0	0	0	0
0	0	0	0	0	0	0	0	0	0	0	0	0	0	0	0	0	0	0	0	0	0	0	0	0	0	0	0	0	0	0	0	0	0	0	0	0	0	0	0	0	0	0	0	0	0	0	0	0	0
0	0	0	0	0	0	0	0	0	0	0	0	0	0	0	0	0	0	0	0	0	0	0	0	0	0	0	0	0	0	0	0	0	0	0	0	0	0	0	0	0	0	0	0	0	0	0	0	0	0
0	0	0	0	0	0	0	0	0	0	0	0	0	0	0	0	0	0	0	0	0	0	0	0	0	0	0	0	0	0	0	0	0	0	0	0	0	0	0	0	0	0	0	0	0	0	0	0	0	0
0	0	0	0	0	0	0	0	0	0	0	0	0	0	0	0	0	0	0	0	0	0	0	0	0	0	0	0	0	0	0	0	0	0	0	0	0	0	0	0	0	0	0	0	0	0	0	0	0	0
0	0	0	0	0	0	0	0	0	0	0	0	0	0	0	0	0	0	0	0	0	0	0	0	0	0	0	0	0	0	0	0	0	0	0	0	0	0	0	0	0	0	0	0	0	0	0	0	0	0
0	0	0	0	0	0	0	0	0	0	0	0	0	0	0	0	0	0	0	0	0	0	0	0	0	0	0	0	0	0	0	0	0	0	0	0	0	0	0	0	0	0	0	0	0	0	0	0	0	0
0	0	0	0	0	0	0	0	0	0	0	0	0	0	0	0	0	0	0	0	0	0	0	0	0	0	0	0	0	0	0	0	0	0	0	0	0	0	0	0	0	0	0	0	0	0	0	0	0	0
0	0	0	0	0	0	0	0	0	0	0	0	0	0	0	0	0	0	0	0	0	0	0	0	0	0	0	0	0	0	0	0	0	0	0	0	0	0	0	0	0	0	0	0	0	0	0	0	0	0
0	0	0	0	0	0	0	0	0	0	0	0	0	0	0	0	0	0	0	0	0	0	0	0	0	0	0	0	0	0	0	0	0	0	0	0	0	0	0	0	0	0	0	0	0	0	0	0	0	0
0	0	0	0	0	0	0	0	0	0	0	0	0	0	0	0	0	0	0	0	0	0	0	0	0	0	0	0	0	0	0	0	0	0	0	0	0	0	0	0	0	0	0	0	0	0	0	0	0	0
0	0	0	0	0	0	0	0	0	0	0	0	0	0	0	0	0	0	0	0	0	0	0	0	0	0	0	0	0	0	0	0	0	0	0	0	0	0	0	0	0	0	0	0	0	0	0	0	0	0
0	0	0	0	0	0	0	0	0	0	0	0	0	0	0	0	0	0	0	0	0	0	0	0	0	0	0	0	0	0	0	0	0	0	0	0	0	0	0	0	0	0	0	0	0	0	0	0	0	0
0	0	0	0	0	0	0	0	0	0	0	0	0	0	0	0	0	0	0	0	0	0	0	0	0	0	0	0	0	0	0	0	0	0	0	0	0	0	0	0	0	0	0	0	0	0	0	0	0	0
0	0	0	0	0	0	0	0	0	0	0	0	0	0	0	0	0	0	0	0	0	0	0	0	0	0	0	0	0	0	0	0	0	0	0	0	0	0	0	0	0	0	0	0	0	0	0	0	0	0
0	0	0	0	0	0	0	0	0	0	0	0	0	0	0	0	0	0	0	0	0	0	0	0	0	0	0	0.0528838	0.0438969	0.0404459	-0.0107428	0	0	0	0	0	0	0	0	0	0	0	0	0	0	0	0	0	0	0
0	0	0	0	0	0	0	0	0	0	0	0	0	0	0	0	0	0	0	0	0	0	0	0	0.0496064	0.0526899	0.0462557	0.03696	0.0292531	0.00996669	0.0455347	0	0	0	0	0	0	0	0	0	0	0	0	0	0	0	0	0	0	0
0	0	0	0	0	0	0	0	0	0	0	0	0	0	0	0	0	0	0	0.041114	0.0382215	0.0265892	0.0159847	0.026591	0.031628	0.0386833	0.036305	0.0367002	0.00925749	-0.00651401	0.0303388	0	0	0	0	0	0	0	0	0	0	0	0	0	0	0	0	0	0	0
0	0	0	0	0	0	0	0	0	0	0	0	0	0	0	0	0	0.0431622	0.0327059	0.00590843	0.0153889	0.0217055	0.036249	0.0244166	0.00573949	0.0193442	0.0207065	0.0174356	0.0158552	-0.0253258	0.00302082	0	0	0	0	0	0	0	0	0	0	0	0	0	0	0	0	0	0	0
0	0	0	0	0	0	0	0	0	0	0	0	0	0	0	0	0.0707438	0.0119644	0.0162962	0.00609265	0.0147501	0.0162927	0.0252188	0.0377566	0.0297814	0.00629136	0.00402284	0.02095	0.0127591	-0.014211	0.015384	0.00615262	0	0	0	0	0	0	0	0	0	0	0	0	0	0	0	0	0	0
0	0	0	0	0	0	0	0	0	0	0	0	0	0	0	0	0.0421507	0.00393841	-0.00869106	-0.00462958	0.000366172	0.0167876	0.0179326	0.0292499	0.0193454	0.00328831	-0.00387436	0.020392	-0.00934227	-0.0368549	0.00423791	0.0086458	0	0	0	0	0	0	0	0	0	0	0	0	0	0	0	0	0	0
0	0	0	0	0	0	0	0	0	0	0	0	0	0	0	0.067986	0.014679	0.00817385	-0.00611727	-0.00308335	1.44322e-05	0.0139112	0.0214983	0.0270295	0.0103394	0.01628	-0.00504859	0.0154547	-0.0185564	-0.0275063	0.00339726	0.00688397	0	0	0	0	0	0	0	0	0	0	0	0	0	0	0	0	0	0
0	0	0	0	0	0	0	0	0	0	0	0	0	0	0	0.0429471	0.0151336	0.019578	-0.0104002	-0.00524148	0.0103827	0.0157008	0.0234893	0.0106881	-0.00217778	0.0017597	0.00598274	0.0197894	-0.0208114	-0.0212796	0.00279636	0.00615355	0	0	0	0	0	0	0	0	0	0	0	0	0	0	0	0	0	0
0	0	0	0	0	0	0	0	0	0	0	0	0	0	0.0625494	0.0196911	0.0217791	-0.00481981	-0.01499	0.00289091	0.00486606	0.0060193	0.015667	0.00178636	-0.0275822	0.00715438	-0.00855488	-0.00141691	-0.0313784	-0.0132111	0.0124461	0.0348466	0	0	0	0	0	0	0	0	0	0	0	0	0	0	0	0	0	0
0	0	0	0	0	0	0	0	0	0	0	0	0	-0.0650023	-0.0566539	-0.0254903	-0.110649	-0.167913	-0.138466	-0.0880157	-0.0821056	-0.0936592	-0.0477291	0.0105077	0.0183996	-0.026586	-0.0878429	0.0118713	0.0476045	0.0267403	0.026605	0.0674936	0	0	0	0	0	0	0	0	0	0	0	0	0	0	0	0	0	0
0	0	0	0	0	0	0	0	0	0	0	0	0.0261336	0.0741279	0.00431486	0.0191447	0.0399383	0.0279724	-0.0180421	-0.00391296	-0.030538	-0.0200394	-0.0296508	-0.0214536	0.001251	0.0708161	-3.70651e-06	0.00066962	-0.00525497	0.000849615	0.0190753	0.0222463	0	0	0	0	0	0	0	0	0	0	0	0	0	0	0	0	0	0
0	0	0	0	0	0	0	0	0	0	0	0.0288187	0.0175816	0.0381446	0.0349511	0.0380233	0.0516141	0.0436788	0.018586	-0.00805924	-0.00460446	-0.0186995	-0.0314273	-0.0245234	0.0155289	-0.0103245	0.000120588	0.00666694	-0.00672025	0.00123823	0.0171395	0.0113855	0	0	0	0	0	0	0	0	0	0	0	0	0	0	0	0	0	0
0	0	0	0	0	0	0	0	0	0	0	0.0312767	0.0137226	0.0368416	0.0472564	0.024336	0.0316523	0.0269682	0.0181644	-0.000293676	-0.00613031	-0.016805	-0.0295405	-0.00389316	0.0343455	0.000384091	-0.00111695	0.00268537	-0.000306144	-0.00334706	0.0132989	0.0137937	0	0	0	0	0	0	0	0	0	0	0	0	0	0	0	0	0	0
0	0	0	0	0	0	0	0	0	0	0	0.0180812	-0.000973232	0.0244298	0.05335	0.0271312	0.0275536	0.0185247	1.77698e-05	-0.00594855	-0.0292336	-0.0265271	-0.0447365	0.0104685	0.00543153	-0.000723589	-0.00488119	-0.00128822	0.0024811	-0.00575111	0.0156576	0.0147523	0	0	0	0	0	0	0	0	0	0	0	0	0	0	0	0	0	0
0	0	0	0	0	0	0	0	0	0	0	0.0143325	0.0236949	0.0533528	0.0549306	0.0312685	0.0126035	0.0346931	-0.0161652	-0.0127251	-0.0186902	-0.0297694	-0.0165104	0.0195553	-0.010395	0.00870187	0.00702044	0.0093126	0.00773038	-0.00458128	0.0216141	0.0118916	0	0	0	0	0	0	0	0	0	0	0	0	0	0	0	0	0	0
0	0	0	0	0	0	0	0	0	0	0	0.0179131	0.0205536	0.0691794	0.0542282	0.0774015	0.0419055	0.0170963	-0.0107682	-0.0172298	-0.0307135	-0.0107419	-0.00455303	-0.00228081	0.0058868	0.00827171	0.00732228	0.00452233	0.00769273	0.00136868	0.0141385	0.0245987	0	0	0	0	0	0	0	0	0	0	0	0	0	0	0	0	0	0
0	0	0	0	0	0	0	0	0	0	0	0.00287484	0.0142198	0.0502991	0.17118	0.324512	0.390831	0.338974	0.222299	0.173343	0.106197	0.0671333	0.0378155	0.0269225	0.0291582	0.0289389	0.024042	0.0220624	0.024924	0.0260734	0.031916	0.0485606	0	0	0	0	0	0	0	0	0	0	0	0	0	0	0	0	0	0
0	0	0	0	0	0	0	0	0	0	0	0.0389259	0.0370414	0.0425113	0.0463368	0.0369039	0.0277886	0.031686	0.035627	0.0321037	0.0137977	0.0291302	0.0207221	0.0188018	0.019771	0.0228925	0.0174206	0.0174997	0.0286059	0.0171459	0.01926	0	0	0	0	0	0	0	0	0	0	0	0	0	0	0	0	0	0	0
0	0	0	0	0	0	0	0	0	0	0	0	0.0303879	0.0283656	0.038291	0.0270761	0.0202488	0.024086	0.0250266	0.0265124	0.0327343	0.010712	0.0222171	0.00426008	0.0126529	0.0224677	0.0207993	0.0108572	0.0233065	0.00838417	0	0	0	0	0	0	0	0	0	0	0	0	0	0	0	0	0	0	0	0
0	0	0	0	0	0	0	0	0	0	0	0	0.0383973	0.0346986	0.0454005	0.0199426	0.0208042	0.0265447	0.0246683	0.0300861	0.0327409	0.035049	0.0229156	0.018193	0.0177236	0.0217865	0.0193224	0.0145886	0.0199353	0.00970826	0	0	0	0	0	0	0	0	0	0	0	0	0	0	0	0	0	0	0	0
0	0	0	0	0	0	0	0	0	0	0	0	0.0419646	0.0289675	0.0462176	0.0381873	0.0286878	0.0245513	0.0239425	0.0187973	0.0225781	0.0197085	0.0167371	0.0120168	0.0169723	0.0172986	0.0101974	0.0141038	0.0164825	0	0	0	0	0	0	0	0	0	0	0	0	0	0	0	0	0	0	0	0	0
0	0	0	0	0	0	0	0	0	0	0	0	0	0	0.0334153	0.0395604	0.0329515	0.0226221	0.0132233	0.031533	0.0220882	0.0206948	0.014996	0.00434582	0.0128321	0.0230291	0.0207652	0	0	0	0	0	0	0	0	0	0	0	0	0	0	0	0	0	0	0	0	0	0	0
0	0	0	0	0	0	0	0	0	0	0	0	0	0	0	0	0	0.0313041	0.0367067	0.0281383	0.0346448	0.0219457	0.0161287	0.0153302	0	0	0	0	0	0	0	0	0	0	0	0	0	0	0	0	0	0	0	0	0	0	0	0	0	0
0	0	0	0	0	0	0	0	0	0	0	0	0	0	0	0	0	0	0	0	0	0	0	0	0	0	0	0	0	0	0	0	0	0	0	0	0	0	0	0	0	0	0	0	0	0	0	0	0	0
0	0	0	0	0	0	0	0	0	0	0	0	0	0	0	0	0	0	0	0	0	0	0	0	0	0	0	0	0	0	0	0	0	0	0	0	0	0	0	0	0	0	0	0	0	0	0	0	0	0
0	0	0	0	0	0	0	0	0	0	0	0	0	0	0	0	0	0	0	0	0	0	0	0	0	0	0	0	0	0	0	0	0	0	0	0	0	0	0	0	0	0	0	0	0	0	0	0	0	0
0	0	0	0	0	0	0	0	0	0	0	0	0	0	0	0	0	0	0	0	0	0	0	0	0	0	0	0	0	0	0	0	0	0	0	0	0	0	0	0	0	0	0	0	0	0	0	0	0	0
0	0	0	0	0	0	0	0	0	0	0	0	0	0	0	0	0	0	0	0	0	0	0	0	0	0	0	0	0	0	0	0	0	0	0	0	0	0	0	0	0	0	0	0	0	0	0	0	0	0
0	0	0	0	0	0	0	0	0	0	0	0	0	0	0	0	0	0	0	0	0	0	0	0	0	0	0	0	0	0	0	0	0	0	0	0	0	0	0	0	0	0	0	0	0	0	0	0	0	0
0	0	0	0	0	0	0	0	0	0	0	0	0	0	0	0	0	0	0	0	0	0	0	0	0	0	0	0	0	0	0	0	0	0	0	0	0	0	0	0	0	0	0	0	0	0	0	0	0	0
0	0	0	0	0	0	0	0	0	0	0	0	0	0	0	0	0	0	0	0	0	0	0	0	0	0	0	0	0	0	0	0	0	0	0	0	0	0	0	0	0	0	0	0	0	0	0	0	0	0
0	0	0	0	0	0	0	0	0	0	0	0	0	0	0	0	0	0	0	0	0	0	0	0	0	0	0	0	0	0	0	0	0	0	0	0	0	0	0	0	0	0	0	0	0	0	0	0	0	0
0	0	0	0	0	0	0	0	0	0	0	0	0	0	0	0	0	0	0	0	0	0	0	0	0	0	0	0	0	0	0	0	0	0	0	0	0	0	0	0	0	0	0	0	0	0	0	0	0	0
0	0	0	0	0	0	0	0	0	0	0	0	0	0	0	0	0	0	0	0	0	0	0	0	0	0	0	0	0	0	0	0	0	0	0	0	0	0	0	0	0	0	0	0	0	0	0	0	0	0
0	0	0	0	0	0	0	0	0	0	0	0	0	0	0	0	0	0	0	0	0	0	0	0	0	0	0	0	0	0	0	0	0	0	0	0	0	0	0	0	0	0	0	0	0	0	0	0	0	0
0	0	0	0	0	0	0	0	0	0	0	0	0	0	0	0	0	0	0	0	0	0	0	0	0	0	0	0	0	0	0	0	0	0	0	0	0	0	0	0	0	0	0	0	0	0	0	0	0	0
0	0	0	0	0	0	0	0	0	0	0	0	0	0	0	0	0	0	0	0	0	0	0	0	0	0	0	0	0	0	0	0	0	0	0	0	0	0	0	0	0	0	0	0	0	0	0	0	0	0
0	0	0	0	0	0	0	0	0	0	0	0	0	0	0	0	0	0	0	0	0	0	0	0	0	0	0	0	0	0	0	0	0	0	0	0	0	0	0	0	0	0	0	0	0	0	0	0	0	0
0	0	0	0	0	0	0	0	0	0	0	0	0	0	0	0	0	0	0	0	0	0	0	0	0	0	0	0	0	0	0	0	0	0	0	0	0	0	0	0	0	0	0	0	0	0	0	0	0	0
0	0	0	0	0	0	0	0	0	0	0	0	0	0	0	0	0	0	0	0	0	0	0	0	0	0	0	0	0	0	0	0	0	0	0	0	0	0	0	0	0	0	0	0	0	0	0	0	0	0
0	0	0	0	0	0	0	0	0	0	0	0	0	0	0	0	0	0	0	0	0	0	0	0	0	0	0	0	0	0	0	0	0	0	0	0	0	0	0	0	0	0	0	0	0	0	0	0	0	0
0	0	0	0	0	0	0	0	0	0	0	0	0	0	0	0	0	0	0	0	0	0	0	0	0	0	0	0	0	0	0	0	0	0	0	0	0	0	0	0	0	0	0	0	0	0	0	0	0	0
0	0	0	0	0	0	0	0	0	0	0	0	0	0	0	0	0	0	0	0	0	0	0	0	0	0	0	0	0	0	0	0	0	0	0	0	0	0	0	0	0	0	0	0	0	0	0	0	0	0
0	0	0	0	0	0	0	0	0	0	0	0	0	0	0	0	0	0	0	0	0	0	0	0	0	0	0	0	0	0	0	0	0	0	0	0	0	0	0	0	0	0	0	0	0	0	0	0	0	0
0	0	0	0	0	0	0	0	0	0	0	0	0	0	0	0	0	0	0	0	0	0	0	0	0	0	0	0	0	0	0	0	0	0	0	0	0	0	0	0	0	0	0	0	0	0	0	0	0	0
0	0	0	0	0	0	0	0	0	0	0	0	0	0	0	0	0	0	0	0	0	0	0	0	0	0	0	0	0	0	0	0	0	0	0	0	0	0	0	0	0	0	0	0	0	0	0	0	0	0
0	0	0	0	0	0	0	0	0	0	0	0	0	0	0	0	0	0	0	0	0	0	0	0	0	0	0	0	0	0	0	0	0	0	0	0	0	0	0	0	0	0	0	0	0	0	0	0	0	0
0	0	0	0	0	0	0	0	0	0	0	0	0	0	0	0	0	0	0	0	0	0	0	0	0	0	0	0	0	0	0	0	0	0	0	0	0	0	0	0	0	0	0	0	0	0	0	0	0	0
0	0	0	0	0	0	0	0	0	0	0	0	0	0	0	0	0	0	0	0	0	0	0	0	0	0	0	0	0	0	0	0	0	0	0	0	0	0	0	0	0	0	0	0	0	0	0	0	0	0
0	0	0	0	0	0	0	0	0	0	0	0	0	0	0	0	0	0	0	0	0	0	0	0	0	0	0	0	0	0	0	0	0	0	0	0	0	0	0	0	0	0	0	0	0	0	0	0	0	0
0	0	0	0	0	0	0	0	0	0	0	0	0	0	0	0	0	0	0	0	0	0	0	0	0	0	0	0	0	0	0	0	0	0	0	0	0	0	0	0	0	0	0	0	0	0	0	0	0	0
0	0	0	0	0	0	0	0	0	0	0	0	0	0	0	0	0	0	0	0	0	0	0	0	0	0	0	0	0	0	0	0	0	0	0	0	0	0	0	0	0	0	0	0	0	0	0	0	0	0
0	0	0	0	0	0	0	0	0	0	0	0	0	0	0	0	0	0	0.111417	0.0762939	0.0617446	0.0423342	0.0299558	0	0	0	0	0	0	0	0	0	0	0	0	0	0	0	0	0	0	0	0	0	0	0	0	0	0	0
0	0	0	0	0	0	0	0	0	0	0	0	0	0	0	0	0	0	0.0775366	0.0769062	0.06295	0.0397517	0.0421403	0	0	0	0	0	0	0	0	0	0	0	0	0	0	0	0	0	0	0	0	0	0	0	0	0	0	0
0	0	0	0	0	0	0	0	0	0	0	0	0	0	0	0	0	0.0418321	0.0516414	0.059774	0.0395826	0.0443058	0.0372317	0	0	0	0	0	0	0	0	0	0	0	0	0	0	0	0	0	0	0	0	0	0	0	0	0	0	0
0	0	0	0	0	0	0	0	0	0	0	0	0	0	0	0	0.0601804	0.0356022	0.0331235	0.0422297	0.0537937	0.0465953	0.0367362	-0.0129571	0	0	0	0	0	0	0	0	0	0	0	0	0	0	0	0	0	0	0	0	0	0	0	0	0	0
0	0	0	0	0	0	0	0	0	0	0	0	0	0	0	0	0.0191797	0.0515987	0.0250868	0.0393172	0.0595194	0.0545338	0.0456291	0.0166768	-0.0335989	0	0	0	0	0	0	0	0	0	0	0	0	0	0	0	0	0	0	0	0	0	0	0	0	0
0	0	0	0	0	0	0	0	0	0	0	0	0	0	0	0.0320225	0.00184313	0.0180834	-0.0110467	0.0180598	0.0293285	0.0264902	0.0148143	0.0100366	0.018837	0.00484136	0	0	0	0	0	0	0	0	0	0	0	0	0	0	0	0	0	0	0	0	0	0	0	0
0	0	0	0	0	0	0	0	0	0	0	0	0	0	0.0815334	-0.0133944	-0.0131636	-0.0073301	-0.0294757	-0.0136855	-0.00779617	-0.0209809	-0.0379462	-0.0385953	0.0207783	0.0498172	0.0414533	0	0	0	0	0	0	0	0	0	0	0	0	0	0	0	0	0	0	0	0	0	0	0
0	0	0	0	0	0	0	0	0	0	0	0	0	0.0357002	-0.000424518	-0.0262965	-0.0200982	0.0194279	0.0117161	0.0210302	0.00797864	0.00671544	0.00669429	0.024009	0.024466	-0.00752914	-0.000830601	0	0	0	0	0	0	0	0	0	0	0	0	0	0	0	0	0	0	0	0	0	0	0
0	0	0	0	0	0	0	0	0	0	0	0	0.0439633	-0.0218984	-0.0141448	-0.0363592	-0.0343111	0.00587971	0.0351116	0.0310216	-0.00436685	0.0163939	0.0108289	0.0134106	0.015229	0.02471	-0.00651332	0.00651692	0	0	0	0	0	0	0	0	0	0	0	0	0	0	0	0	0	0	0	0	0	0
0	0	0	0	0	0	0	0	0	0	0	0	0.0154579	-0.025107	-0.0155658	-0.0466806	-0.0302277	0.00681574	0.0214648	0.0295929	0.0134159	0.014155	0.00460561	0.00824876	0.00130597	0.0240439	0.00129171	0.00437707	0	0	0	0	0	0	0	0	0	0	0	0	0	0	0	0	0	0	0	0	0	0
0	0	0	0	0	0	0	0	0	0	0	0	0.00856891	-0.029026	-0.0166384	-0.0550017	-0.0359505	0.00683907	0.0217986	0.0145801	0.0214013	0.0208065	0.0093479	-0.0038065	0.0126545	0.0145398	0.00717284	0.00104605	0	0	0	0	0	0	0	0	0	0	0	0	0	0	0	0	0	0	0	0	0	0
0	0	0	0	0	0	0	0	0	0	0	0	-0.007378	-0.0278641	-0.0103858	-0.0451819	-0.0272737	-0.00636128	0.0193115	0.0294607	0.0423599	0.0136042	0.00841164	0.0114413	0.0194975	0.0159643	0.00399793	0.00993948	-0.000416322	0	0	0	0	0	0	0	0	0	0	0	0	0	0	0	0	0	0	0	0	0
0	0	0	0	0	0	0	0	0	0	0	0.0292964	-0.0167091	-0.0135093	-0.0163101	-0.0442429	-0.0299108	0.00502789	0.0117975	0.0232109	0.0183367	0.0158294	0.0103031	0.0191093	0.0112551	0.00695609	0.0052692	0.00723714	0.010684	0	0	0	0	0	0	0	0	0	0	0	0	0	0	0	0	0	0	0	0	0
0	0	0	0	0	0	0	0	0	0	0	0.0473112	0.00324554	-0.0200987	-0.0519755	-0.0386777	-0.0384339	-0.0141589	-0.00780467	-0.00690602	-0.0180539	-0.025313	-0.0294897	-0.0154533	-0.0146602	-0.00820274	-0.0085146	0.00299561	0.0112455	0	0	0	0	0	0	0	0	0	0	0	0	0	0	0	0	0	0	0	0	0
0	0	0	0	0	0	0	0	0	0	0	0	-0.00812704	0.00702275	-0.00475765	-0.00288404	0.00729964	0.0140906	0.0200059	0.0357967	0.0236457	0.0232152	0.0147184	0.0278292	0.0298971	0.0361888	0.028706	0.0281198	0.023311	0	0	0	0	0	0	0	0	0	0	0	0	0	0	0	0	0	0	0	0	0
0	0	0	0	0	0	0	0	0	0	0	0.0293536	-0.00232368	0.0148594	0.00150613	0.0178397	0.0218714	0.0255	0.0301943	0.0307283	0.0269059	0.0297992	0.0332538	0.0295637	0.0138795	0.0263279	0.0203986	0.0310622	0	0	0	0	0	0	0	0	0	0	0	0	0	0	0	0	0	0	0	0	0	0
0	0	0	0	0	0	0	0	0	0	0	0	0.00286619	0.0206076	0.0249451	0.0270071	0.0288724	0.0271531	0.0385122	0.03904	0.0285495	0.0237689	0.0299648	0.0304071	0.0395097	0.0278021	0.0243163	0.0238882	0	0	0	0	0	0	0	0	0	0	0	0	0	0	0	0	0	0	0	0	0	0
0	0	0	0	0	0	0	0	0	0	0	0	0.0202331	0.0159056	0.0314962	0.0237354	0.0348123	0.0354587	0.0508353	0.0515849	0.0286097	0.0249729	0.0256067	0.0209746	0.030249	0.0274513	0.0177139	0	0	0	0	0	0	0	0	0	0	0	0	0	0	0	0	0	0	0	0	0	0	0
0	0	0	0	0	0	0	0	0	0	0	0	0.0169267	0.0149013	0.027892	0.0361096	0.0182614	0.037443	0.0530864	0.0514818	0.0332533	0.0287027	0.0248586	0.0266654	0.0271965	0.0250024	0	0	0	0	0	0	0	0	0	0	0	0	0	0	0	0	0	0	0	0	0	0	0	0
0	0	0	0	0	0	0	0	0	0	0	0	0.0413079	0.024227	0.0272437	0.0326073	0.0290209	0.0302523	0.0315681	0.0247424	0.0303925	0.0191912	0.0183118	0.0326525	0.0282835	0.0201535	0	0	0	0	0	0	0	0	0	0	0	0	0	0	0	0	0	0	0	0	0	0	0	0
0	0	0	0	0	0	0	0	0	0	0	0	0.0331525	0.0255873	0.0219567	0.0304977	0.032899	0.0203236	0.0192669	0.0215042	0.0279453	0.023436	0.0321682	0.0196426	0	0	0	0	0	0	0	0	0	0	0	0	0	0	0	0	0	0	0	0	0	0	0	0	0	0
0	0	0	0	0	0	0	0	0	0	0	0	0	0	0	0	0	0	0	0	0	0	0	0	0	0	0	0	0	0	0	0	0	0	0	0	0	0	0	0	0	0	0	0	0	0	0	0	0	0
0	0	0	0	0	0	0	0	0	0	0	0	0	0	0	0	0	0	0	0	0	0	0	0	0	0	0	0	0	0	0	0	0	0	0	0	0	0	0	0	0	0	0	0	0	0	0	0	0	0
0	0	0	0	0	0	0	0	0	0	0	0	0	0	0	0	0	0	0	0	0	0	0	0	0	0	0	0	0	0	0	0	0	0	0	0	0	0	0	0	0	0	0	0	0	0	0	0	0	0
0	0	0	0	0	0	0	0	0	0	0	0	0	0	0	0	0	0	0	0	0	0	0	0	0	0	0	0	0	0	0	0	0	0	0	0	0	0	0	0	0	0	0	0	0	0	0	0	0	0
0	0	0	0	0	0	0	0	0	0	0	0	0	0	0	0	0	0	0	0	0	0	0	0	0	0	0	0	0	0	0	0	0	0	0	0	0	0	0	0	0	0	0	0	0	0	0	0	0	0
0	0	0	0	0	0	0	0	0	0	0	0	0	0	0	0	0	0	0	0	0	0	0	0	0	0	0	0	0	0	0	0	0	0	0	0	0	0	0	0	0	0	0	0	0	0	0	0	0	0
0	0	0	0	0	0	0	0	0	0	0	0	0	0	0	0	0	0	0	0	0	0	0	0	0	0	0	0	0	0	0	0	0	0	0	0	0	0	0	0	0	0	0	0	0	0	0	0	0	0
0	0	0	0	0	0	0	0	0	0	0	0	0	0	0	0	0	0	0	0	0	0	0	0	0	0	0	0	0	0	0	0	0	0	0	0	0	0	0	0	0	0	0	0	0	0	0	0	0	0
0	0	0	0	0	0	0	0	0	0	0	0	0	0	0	0	0	0	0	0	0	0	0	0	0	0	0	0	0	0	0	0	0	0	0	0	0	0	0	0	0	0	0	0	0	0	0	0	0	0
0	0	0	0	0	0	0	0	0	0	0	0	0	0	0	0	0	0	0	0	0	0	0	0	0	0	0	0	0	0	0	0	0	0	0	0	0	0	0	0	0	0	0	0	0	0	0	0	0	0
0	0	0	0	0	0	0	0	0	0	0	0	0	0	0	0	0	0	0	0	0	0	0	0	0	0	0	0	0	0	0	0	0	0	0	0	0	0	0	0	0	0	0	0	0	0	0	0	0	0
0	0	0	0	0	0	0	0	0	0	0	0	0	0	0	0	0	0	0	0	0	0	0	0	0	0	0	0	0	0	0	0	0	0	0	0	0	0	0	0	0	0	0	0	0	0	0	0	0	0
0	0	0	0	0	0	0	0	0	0	0	0	0	0	0	0	0	0	0	0	0	0	0	0	0	0	0	0	0	0	0	0	0	0	0	0	0	0	0	0	0	0	0	0	0	0	0	0	0	0
0	0	0	0	0	0	0	0	0	0	0	0	0	0	0	0	0	0	0	0	0	0	0	0	0	0	0	0	0	0	0	0	0	0	0	0	0	0	0	0	0	0	0	0	0	0	0	0	0	0
0	0	0	0	0	0	0	0	0	0	0	0	0	0	0	0	0	0	0	0	0	0	0	0	0	0	0	0	0	0	0	0	0	0	0	0	0	0	0	0	0	0	0	0	0	0	0	0	0	0
0	0	0	0	0	0	0	0	0	0	0	0	0	0	0	0	0	0	0	0	0	0	0	0	0	0	0	0	0	0	0	0	0	0	0	0	0	0	0	0	0	0	0	0	0	0	0	0	0	0
0	0	0	0	0	0	0	0	0	0	0	0	0	0	0	0	0	0	0	0	0	0	0	0	0	0	0	0	0	0	0	0	0	0	0	0	0	0	0	0	0	0	0	0	0	0	0	0	0	0
0	0	0	0	0	0	0	0	0	0	0	0	0	0	0	0	0	0	0	0	0	0	0	0	0	0	0	0	0	0	0	0	0	0	0	0	0	0	0	0	0	0	0	0	0	0	0	0	0	0
0	0	0	0	0	0	0	0	0	0	0	0	0	0	0	0	0	0	0	0	0	0	0	0	0	0	0	0	0	0	0	0	0	0	0	0	0	0	0	0	0	0	0	0	0	0	0	0	0	0
0	0	0	0	0	0	0	0	0	0	0	0	0	0	0	0	0	0	0	0	0	0	0	0	0	0	0	0	0	0	0	0	0	0	0	0	0	0	0	0	0	0	0	0	0	0	0	0	0	0
0	0	0	0	0	0	0	0	0	0	0	0	0	0	0	0	0	0	0	0	0	0	0	0	0	0	0	0	0	0	0	0	0	0	0	0	0	0	0	0	0	0	0	0	0	0	0	0	0	0
0	0	0	0	0	0	0	0	0	0	0	0	0	0	0	0	0	0	0	0	0	0	0	0	0	0	0	0	0	0	0	0	0	0	0	0	0	0	0	0	0	0	0	0	0	0	0	0	0	0
0	0	0	0	0	0	0	0	0	0	0	0	0	0	0	0	0	0	0	0	0	0	0	0	0	0	0	0	0	0	0	0	0	0	0	0	0	0	0	0	0	0	0	0	0	0	0	0	0	0
0	0	0	0	0	0	0	0	0	0	0	0	0	0	0	0	0	0	0	0	0	0	0	0	0	0	0	0	0	0	0	0	0	0	0	0	0	0	0	0	0	0	0	0	0	0	0	0	0	0
0	0	0	0	0	0	0	0	0	0	0	0	0	0	0	0	0	0	0	0	0	0	0	0	0	0	0	0	0	0	0	0	0	0	0	0	0	0	0	0	0	0	0	0	0	0	0	0	0	0
0	0	0	0	0	0	0	0	0	0	0	0	0	0	0	0	0	0	0	0	0	0	0	0	0	0	0	0	0	0	0	0	0	0	0	0	0	0	0	0	0	0	0	0	0	0	0	0	0	0
0	0	0	0	0	0	0	0	0	0	0	0	0	0	0	0	0	0	0	0	0	0	0	0	0	0	0	0	0	0	0	0	0	0	0	0	0	0	0	0	0	0	0	0	0	0	0	0	0	0
0	0	0	0	0	0	0	0	0	0	0	0	0	0	0	0	0	0	0	0	0	0	0	0	0	0	0	0	0	0	0	0	0	0	0	0	0	0	0	0	0	0	0	0	0	0	0	0	0	0
0	0	0	0	0	0	0	0	0	0	0	0	0	0	0	0	0	0	0	0	0	0	0	0	0	0	0	0	0	0	0	0	0	0	0	0	0	0	0	0	0	0	0	0	0	0	0	0	0	0
0	0	0	0	0	0	0	0	0	0	0	0	0	0	0	0	0	0	0	0	0	0	0	0	0	0	0	0	0	0	0	0	0	0	0	0	0	0	0	0	0	0	0	0	0	0	0	0	0	0
0	0	0	0	0	0	0	0	0	0	0	0	0	0	0	0	0	0	0	0	0	0	0	0	0	0	0	0	0	0	0	0	0	0	0	0	0	0	0	0	0	0	0	0	0	0	0	0	0	0
0	0	0	0	0	0	0	0	0	0	0	0	0	0	0	0	0	0	0	0	0	0	0	0	0	0	0	0	0	0	0	0	0	0	0	0	0	0	0	0	0	0	0	0	0	0	0	0	0	0
0	0	0	0	0	0	0	0	0	0	0	0	0	0	0	0	0	0	0	0	0	0	0	0	0	0	0	0	0	0	0	0	0	0	0	0	0	0	0	0	0	0	0	0	0	0	0	0	0	0
0	0	0	0	0	0	0	0	0	0	0	0	0	0	0	0	0	0	0	0	0	0	0	0	0	0	0	0	0	0	0	0	0	0	0	0	0	0	0	0	0	0	0	0	0	0	0	0	0	0
0	0	0	0	0	0	0	0	0	0	0	0	0	0	0	0	0	0	0	0	0	0	0	0	0	0	0	0	0	0	0	0	0	0	0	0	0	0	0	0	0	0	0	0	0	0	0	0	0	0
0	0	0	0	0	0	0	0	0	0	0	0	0	0	0	0	0	0	0	0	0	0	0	0	0	0	0	0	0	0	0	0	0	0	0	0	0	0	0	0	0	0	0	0	0	0	0	0	0	0
0	0	0	0	0	0	0	0	0	0	0	0	0	0	0	0	0	0	0	0	0	0	0	0	0	0	0	0	0	0	0	0	0	0	0	0	0	0	0	0	0	0	0	0	0	0	0	0	0	0
0	0	0	0	0	0	0	0	0	0	0	0	0	0	0	0	0	0	0	0	0	0	0	0	0	0	0	0	0	0	0	0	0	0	0	0	0	0	0	0	0	0	0	0	0	0	0	0	0	0
0	0	0	0	0	0	0	0	0	0	0	0	0	0	0	0	0	0	0	0	0	0	0	0	0	0	0	0	0	0	0	0	0	0	0	0	0	0	0	0	0	0	0	0	0	0	0	0	0	0
0	0	0	0	0	0	0	0	0	0	0	0	0	0	0	0	0	0	0	0	0	0	0	0	0	0	0	0	0	0	0	0	0	0	0	0	0	0	0	0	0	0	0	0	0	0	0	0	0	0
0	0	0	0	0	0	0	0	0	0	0	0	0	0	0	0	0	0	0	0	0	0	0	0	0	0	0	0	0	0	0	0	0	0	0	0	0	0	0	0	0	0	0	0	0	0	0	0	0	0
0	0	0	0	0	0	0	0	0	0	0	0	0	0	0	0	0	0	0	0	0	0	0	0	0	0	0	0	0	0	0	0	0	0	0	0	0	0	0	0	0	0	0	0	0	0	0	0	0	0
0	0	0	0	0	0	0	0	0	0	0	0	0	0	0	0	0	0	0	0	0	0	0	0	0	0	0	0	0	0	0	0	0	0	0	0	0	0	0	0	0	0	0	0	0	0	0	0	0	0
0	0	0	0	0	0	0	0	0	0	0	0	0	0	0	0	0	0	0	0	0	0	0	0	0	0	0	0	0	0	0	0	0	0	0	0	0	0	0	0	0	0	0	0	0	0	0	0	0	0
0	0	0	0	0	0	0	0	0	0	0	0	0	0	0	0	0	0	0	0	0	0	0	0	0	0	0	0	0	0	0	0	0	0	0	0	0	0	0	0	0	0	0	0	0	0	0	0	0	0
0	0	0	0	0	0	0	0	0	0	0	0	0	0	0	0	0	0	0	0	0	0	0	0	0	0	0	0	0	0	0	0	0	0	0	0	0	0	0	0	0	0	0	0	0	0	0	0	0	0
0	0	0	0	0	0	0	0	0	0	0	0	0	0	0	0	0	0	0	0	0	0	0	0	0	0	0	0	0	0	0	0	0	0	0	0	0	0	0	0	0	0	0	0	0	0	0	0	0	0
0	0	0	0	0	0	0	0	0	0	0	0	0	0	0	0	0	0	0	0	0	0	0	0	0	0	0	0	0	0	0	0	0	0	0	0	0	0	0	0	0	0	0	0	0	0	0	0	0	0
0	0	0	0	0	0	0	0	0	0	0	0	0	0	0	0	0	0	0	0	0	0	0	0	0	0	0	0	0	0	0	0	0	0	0	0	0	0	0	0	0	0	0	0	0	0	0	0	0	0
0	0	0	0	0	0	0	0	0	0	0	0	0	0	0	0	0	0	0	0	0	0	0	0	0	0	0	0	0	0	0	0	0	0	0	0	0	0	0	0	0	0	0	0	0	0	0	0	0	0
0	0	0	0	0	0	0	0	0	0	0	0	0	0	0	0	0	0	0	0	0	0	0	0	0	0	0	0	0	0	0	0	0	0	0	0	0	0	0	0	0	0	0	0	0	0	0	0	0	0
0	0	0	0	0	0	0	0	0	0	0	0	0	0	0	0	0	0	0	0	0	0	0	0	0	0	0	0	0	0	0	0	0	0	0	0	0	0	0	0	0	0	0	0	0	0	0	0	0	0
0	0	0	0	0	0	0	0	0	0	0	0	0	0	0	0	0	0	0	0	0	0	0	0	0	0	0	0	0	0	0	0	0	0	0	0	0	0	0	0	0	0	0	0	0	0	0	0	0	0
0	0	0	0	0	0	0	0	0	0	0	0	0	0	0	0	0	0	0	0	0	0	0	0	0	0	0	0	0	0	0	0	0	0	0	0	0	0	0	0	0	0	0	0	0	0	0	0	0	0
0	0	0	0	0	0	0	0	0	0	0	0	0	0	0	0	0	0	0	0	0	0	0	0	0	0	0	0	0	0	0	0	0	0	0	0	0	0	0	0	0	0	0	0	0	0	0	0	0	0
0	0	0	0	0	0	0	0	0	0	0	0	0	0	0	0	0	0	0	0	0	0	0	0	0	0	0	0	0	0	0	0	0	0	0	0	0	0	0	0	0	0	0	0	0	0	0	0	0	0
0	0	0	0	0	0	0	0	0	0	0	0	0	0	0	0	0	0	0	0	0	0	0	0	0	0	0	0	0	0	0	0	0	0	0	0	0	0	0	0	0	0	0	0	0	0	0	0	0	0
0	0	0	0	0	0	0	0	0	0	0	0	0	0	0	0	0	0	0	0	0	0	0	0	0	0	0	0	0	0	0	0	0	0	0	0	0	0	0	0	0	0	0	0	0	0	0	0	0	0
0	0	0	0	0	0	0	0	0	0	0	0	0	0	0	0	0	0	0	0	0	0	0	0	0	0	0	0	0	0	0	0	0	0	0	0	0	0	0	0	0	0	0	0	0	0	0	0	0	0
0	0	0	0	0	0	0	0	0	0	0	0	0	0	0	0	0	0	0	0	0	0	0	0	0	0	0	0	0	0	0	0	0	0	0	0	0	0	0	0	0	0	0	0	0	0	0	0	0	0
0	0	0	0	0	0	0	0	0	0	0	0	0	0	0	0	0	0	0	0	0	0	0	0	0	0	0	0	0	0	0	0	0	0	0	0	0	0	0	0	0	0	0	0	0	0	0	0	0	0
0	0	0	0	0	0	0	0	0	0	0	0	0	0	0	0	0	0	0	0	0	0	0	0	0	0	0	0	0	0	0	0	0	0	0	0	0	0	0	0	0	0	0	0	0	0	0	0	0	0
0	0	0	0	0	0	0	0	0	0	0	0	0	0	0	0	0	0	0	0	0	0	0	0	0	0	0	0	0	0	0	0	0	0	0	0	0	0	0	0	0	0	0	0	0	0	0	0	0	0
0	0	0	0	0	0	0	0	0	0	0	0	0	0	0	0	0	0	0	0	0	0	0	0	0	0	0	0	0	0	0	0	0	0	0	0	0	0	0	0	0	0	0	0	0	0	0	0	0	0
0	0	0	0	0	0	0	0	0	0	0	0	0	0	0	0	0	0	0	0	0	0	0	0	0	0	0	0	0	0	0	0	0	0	0	0	0	0	0	0	0	0	0	0	0	0	0	0	0	0
0	0	0	0	0	0	0	0	0	0	0	0	0	0	0	0	0	0	0	0	0	0	0	0	0	0	0	0	0	0	0	0	0	0	0	0	0	0	0	0	0	0	0	0	0	0	0	0	0	0
0	0	0	0	0	0	0	0	0	0	0	0	0	0	0	0	0	0	0	0	0	0	0	0	0	0	0	0	0	0	0	0	0	0	0	0	0	0	0	0	0	0	0	0	0	0	0	0	0	0
[truncated: 2,510 more columns]
